# Supplementary material for: <span aria-describedby="tippy-17">Transcriptomic and Metabolomic Profiling Provides Insights into Flavonoids Biosynthesis and Flower Coloring in <em>Loropetalum chinense</em> and <em>Loropetalum chinense</em> var. <em>rubrum</em>
Source: Preprints.org preprint supplement (doi:10.20944/preprints202304.0456.v1), 2023-04-18
Supplement: Supplementary file 1 [file supplementary]

## Sheet: Table S25 
Supplementary table S25 The GO enrichment analysis of DETs between XNFJ VS LDPF group
GO_accession	Description	Term_type	Over_represented_pValue	Corrected_pValue	DEG_item	DEG_list	Bg_item	Bg_list	up	Down
GO:0005488	binding	molecular_function	2.71e-07	3.03e-05	9013	14743	45204	76974	5762	0
GO:0003824	catalytic activity	molecular_function	3.09e-15	2.07e-12	7558	14743	37140	76974	4723	0
GO:0008152	metabolic process	biological_process	2.98e-05	0.002413	7514	14743	38138	76974	4723	0
GO:0009987	cellular process	biological_process	0.036557	0.50492	6899	14743	35601	76974	4351	0
GO:0071704	organic substance metabolic process	biological_process	0.029946	0.44643	5858	14743	30055	76974	3660	0
GO:0044238	primary metabolic process	biological_process	0.031921	0.46553	5631	14743	28867	76974	3521	0
GO:0044699	single-organism process	biological_process	1.01e-05	0.000891	5362	14743	26880	76974	3408	0
GO:0097159	organic cyclic compound binding	molecular_function	6.66e-10	9.78e-08	5162	14743	25105	76974	3297	0
GO:1901363	heterocyclic compound binding	molecular_function	6.66e-10	9.78e-08	5162	14743	25105	76974	3297	0
GO:0044237	cellular metabolic process	biological_process	0.14309	1	5021	14743	25988	76974	3159	0
GO:0043167	ion binding	molecular_function	1.37e-11	3.05e-09	4927	14743	23628	76974	3138	0
GO:0043170	macromolecule metabolic process	biological_process	0.57991	1	4258	14743	22305	76974	2698	0
GO:0005515	protein binding	molecular_function	9.41e-09	1.34e-06	3918	14743	18804	76974	2534	0
GO:0044260	cellular macromolecule metabolic process	biological_process	0.44872	1	3845	14743	20056	76974	2462	0
GO:0044763	single-organism cellular process	biological_process	0.003994	0.11576	3724	14743	18770	76974	2325	0
GO:0036094	small molecule binding	molecular_function	3.59e-14	2.11e-11	3339	14743	15382	76974	2095	0
GO:0000166	nucleotide binding	molecular_function	1.73e-13	6.79e-11	3262	14743	15049	76974	2053	0
GO:1901265	nucleoside phosphate binding	molecular_function	1.73e-13	6.79e-11	3262	14743	15049	76974	2053	0
GO:0043168	anion binding	molecular_function	9.57e-14	4.49e-11	3223	14743	14833	76974	2036	0
GO:0044710	single-organism metabolic process	biological_process	7.19e-07	7.86e-05	3022	14743	14730	76974	1921	0
GO:0016740	transferase activity	molecular_function	1.63e-05	0.001364	3014	14743	14628	76974	1877	0
GO:0006807	nitrogen compound metabolic process	biological_process	0.83263	1	2931	14743	15693	76974	1840	0
GO:0097367	carbohydrate derivative binding	molecular_function	5.96e-11	9.66e-09	2854	14743	13219	76974	1796	0
GO:0032553	ribonucleotide binding	molecular_function	2.61e-11	4.72e-09	2836	14743	13096	76974	1787	0
GO:0017076	purine nucleotide binding	molecular_function	3.63e-11	6.09e-09	2836	14743	13106	76974	1786	0
GO:0001882	nucleoside binding	molecular_function	2.39e-11	4.66e-09	2817	14743	12996	76974	1774	0
GO:0001883	purine nucleoside binding	molecular_function	2.48e-11	4.66e-09	2816	14743	12992	76974	1774	0
GO:0032549	ribonucleoside binding	molecular_function	2.48e-11	4.66e-09	2816	14743	12992	76974	1774	0
GO:0032550	purine ribonucleoside binding	molecular_function	2.48e-11	4.66e-09	2816	14743	12992	76974	1774	0
GO:0032555	purine ribonucleotide binding	molecular_function	2.89e-11	5.03e-09	2816	14743	12997	76974	1774	0
GO:0034641	cellular nitrogen compound metabolic process	biological_process	0.97251	1	2678	14743	14584	76974	1691	0
GO:0030554	adenyl nucleotide binding	molecular_function	4.63e-13	1.28e-10	2681	14743	12188	76974	1684	0
GO:0032559	adenyl ribonucleotide binding	molecular_function	4.46e-13	1.28e-10	2667	14743	12116	76974	1677	0
GO:0016020	membrane	cellular_component	0.99967	1	2638	14743	14698	76974	1629	0
GO:1901360	organic cyclic compound metabolic process	biological_process	0.20003	1	2576	14743	13346	76974	1624	0
GO:0035639	purine ribonucleoside triphosphate binding	molecular_function	7.55e-05	0.005629	2558	14743	12238	76974	1618	0
GO:0009058	biosynthetic process	biological_process	0.68186	1	2578	14743	13737	76974	1601	0
GO:0019538	protein metabolic process	biological_process	0.065183	0.74841	2454	14743	12439	76974	1544	0
GO:0005623	cell	cellular_component	0.99981	1	2385	14743	13510	76974	1532	0
GO:0044464	cell part	cellular_component	0.99981	1	2385	14743	13510	76974	1532	0
GO:0016787	hydrolase activity	molecular_function	0.30852	1	2503	14743	12931	76974	1525	0
GO:0006725	cellular aromatic compound metabolic process	biological_process	0.83309	1	2414	14743	12874	76974	1516	0
GO:0005524	ATP binding	molecular_function	1.25e-05	0.001067	2395	14743	11323	76974	1512	0
GO:0046483	heterocycle metabolic process	biological_process	0.88452	1	2397	14743	12836	76974	1507	0
GO:1901576	organic substance biosynthetic process	biological_process	0.89414	1	2410	14743	13027	76974	1493	0
GO:0005622	intracellular	cellular_component	0.99967	1	2187	14743	12395	76974	1405	0
GO:0044249	cellular biosynthetic process	biological_process	0.99692	1	2249	14743	12484	76974	1393	0
GO:0006139	nucleobase-containing compound metabolic process	biological_process	0.94453	1	2211	14743	11932	76974	1391	0
GO:0044424	intracellular part	cellular_component	0.99902	1	2123	14743	11984	76974	1373	0
GO:0044267	cellular protein metabolic process	biological_process	0.024874	0.38772	2026	14743	10134	76974	1305	0
GO:0003676	nucleic acid binding	molecular_function	0.97224	1	1998	14743	10810	76974	1277	0
GO:0090304	nucleic acid metabolic process	biological_process	0.81528	1	1989	14743	10608	76974	1265	0
GO:0043169	cation binding	molecular_function	0.057994	0.68085	1910	14743	9614	76974	1236	0
GO:0046872	metal ion binding	molecular_function	0.089346	0.91013	1880	14743	9505	76974	1221	0
GO:0065007	biological regulation	biological_process	0.07336	0.80679	1872	14743	9595	76974	1194	0
GO:0051179	localization	biological_process	0.99972	1	1871	14743	10461	76974	1181	0
GO:0050789	regulation of biological process	biological_process	0.025017	0.38772	1810	14743	9149	76974	1159	0
GO:0051234	establishment of localization	biological_process	0.99976	1	1821	14743	10203	76974	1155	0
GO:0006810	transport	biological_process	0.9998	1	1811	14743	10160	76974	1149	0
GO:0050794	regulation of cellular process	biological_process	0.01047	0.24258	1757	14743	8795	76974	1128	629
GO:0010467	gene expression	biological_process	0.99094	1	1788	14743	9927	76974	1122	666
GO:0016772	transferase activity, transferring phosphorus-containing groups	molecular_function	0.020499	0.34878	1758	14743	8634	76974	1095	663
GO:0043226	organelle	cellular_component	0.99419	1	1661	14743	9327	76974	1082	579
GO:0043229	intracellular organelle	cellular_component	0.9989	1	1614	14743	9177	76974	1056	558
GO:0055114	oxidation-reduction process	biological_process	3.4e-13	1.14e-10	1602	14743	7221	76974	1048	554
GO:0043412	macromolecule modification	biological_process	0.003851	0.11232	1634	14743	7909	76974	1046	588
GO:0009059	macromolecule biosynthetic process	biological_process	0.99999	1	1634	14743	9486	76974	1015	619
GO:0044271	cellular nitrogen compound biosynthetic process	biological_process	0.9985	1	1605	14743	9067	76974	1010	595
GO:0034645	cellular macromolecule biosynthetic process	biological_process	0.99999	1	1615	14743	9387	76974	1004	611
GO:0016491	oxidoreductase activity	molecular_function	8.17e-14	4.27e-11	1536	14743	6885	76974	992	544
GO:0016070	RNA metabolic process	biological_process	0.86982	1	1519	14743	8141	76974	961	558
GO:0050896	response to stimulus	biological_process	1.85e-07	2.12e-05	1425	14743	6765	76974	955	470
GO:0006464	cellular protein modification process	biological_process	0.000852	0.037407	1479	14743	7035	76974	947	532
GO:0036211	protein modification process	biological_process	0.000852	0.037407	1479	14743	7035	76974	947	532
GO:0044425	membrane part	cellular_component	1	1	1522	14743	9233	76974	945	577
GO:0016301	kinase activity	molecular_function	0.00032	0.018316	1436	14743	6739	76974	916	520
GO:0006796	phosphate-containing compound metabolic process	biological_process	0.00867	0.21543	1465	14743	7094	76974	913	552
GO:0006793	phosphorus metabolic process	biological_process	0.00889	0.21858	1465	14743	7096	76974	913	552
GO:1901362	organic cyclic compound biosynthetic process	biological_process	0.31649	1	1450	14743	7560	76974	907	543
GO:1902578	single-organism localization	biological_process	0.97509	1	1384	14743	7563	76974	876	508
GO:0044765	single-organism transport	biological_process	0.97507	1	1365	14743	7461	76974	864	501
GO:0043227	membrane-bounded organelle	cellular_component	0.99969	1	1266	14743	7267	76974	849	417
GO:0043231	intracellular membrane-bounded organelle	cellular_component	0.9997	1	1265	14743	7263	76974	848	417
GO:0016773	phosphotransferase activity, alcohol group as acceptor	molecular_function	0.002906	0.091583	1327	14743	6303	76974	842	485
GO:0032991	macromolecular complex	cellular_component	1	1	1240	14743	7430	76974	799	441
GO:0018130	heterocycle biosynthetic process	biological_process	0.98515	1	1273	14743	7062	76974	794	479
GO:0019438	aromatic compound biosynthetic process	biological_process	0.97045	1	1270	14743	6998	76974	789	481
GO:0046914	transition metal ion binding	molecular_function	0.65752	1	1161	14743	6057	76974	767	394
GO:0016310	phosphorylation	biological_process	4.24e-05	0.003262	1197	14743	5495	76974	745	452
GO:0004672	protein kinase activity	molecular_function	0.002257	0.076599	1166	14743	5485	76974	739	427
GO:0031224	intrinsic component of membrane	cellular_component	1	1	1172	14743	7019	76974	731	441
GO:0003677	DNA binding	molecular_function	0.93298	1	1138	14743	6205	76974	727	411
GO:0016021	integral component of membrane	cellular_component	1	1	1163	14743	6991	76974	723	440
GO:0006468	protein phosphorylation	biological_process	3.16e-05	0.002512	1121	14743	5102	76974	709	412
GO:0051716	cellular response to stimulus	biological_process	0.000169	0.010635	1021	14743	4862	76974	685	336
GO:0034654	nucleobase-containing compound biosynthetic process	biological_process	0.99405	1	1105	14743	6217	76974	680	425
GO:1901564	organonitrogen compound metabolic process	biological_process	0.7157	1	1076	14743	5813	76974	669	407
GO:0043234	protein complex	cellular_component	1	1	996	14743	5977	76974	637	359
GO:0005737	cytoplasm	cellular_component	0.99252	1	983	14743	5704	76974	626	357
GO:0032774	RNA biosynthetic process	biological_process	0.96143	1	1003	14743	5539	76974	614	389
GO:0019222	regulation of metabolic process	biological_process	0.74344	1	993	14743	5278	76974	608	385
GO:0005634	nucleus	cellular_component	0.99116	1	887	14743	4996	76974	607	280
GO:0006351	transcription, DNA-templated	biological_process	0.96484	1	984	14743	5446	76974	603	381
GO:0097659	nucleic acid-templated transcription	biological_process	0.96484	1	984	14743	5446	76974	603	381
GO:0060255	regulation of macromolecule metabolic process	biological_process	0.60415	1	944	14743	4965	76974	580	364
GO:0031323	regulation of cellular metabolic process	biological_process	0.64407	1	949	14743	4990	76974	580	369
GO:0005215	transporter activity	molecular_function	0.98706	1	929	14743	5219	76974	579	350
GO:0007154	cell communication	biological_process	6.59e-05	0.004989	818	14743	3808	76974	573	245
GO:0016817	hydrolase activity, acting on acid anhydrides	molecular_function	0.002234	0.076599	905	14743	4281	76974	573	332
GO:0080090	regulation of primary metabolic process	biological_process	0.66716	1	914	14743	4816	76974	563	351
GO:0010468	regulation of gene expression	biological_process	0.62024	1	910	14743	4792	76974	559	351
GO:0051171	regulation of nitrogen compound metabolic process	biological_process	0.48185	1	893	14743	4640	76974	552	341
GO:0016818	hydrolase activity, acting on acid anhydrides, in phosphorus-containing anhydrides	molecular_function	0.000333	0.018835	870	14743	4030	76974	550	320
GO:0009889	regulation of biosynthetic process	biological_process	0.51812	1	887	14743	4621	76974	545	342
GO:0010556	regulation of macromolecule biosynthetic process	biological_process	0.5427	1	885	14743	4619	76974	544	341
GO:0031326	regulation of cellular biosynthetic process	biological_process	0.5427	1	885	14743	4619	76974	544	341
GO:2000112	regulation of cellular macromolecule biosynthetic process	biological_process	0.58096	1	875	14743	4581	76974	538	337
GO:0016462	pyrophosphatase activity	molecular_function	0.00024	0.014274	845	14743	3892	76974	536	309
GO:0044422	organelle part	cellular_component	0.99989	1	804	14743	4767	76974	528	276
GO:0044446	intracellular organelle part	cellular_component	0.99996	1	792	14743	4736	76974	520	272
GO:0019219	regulation of nucleobase-containing compound metabolic process	biological_process	0.21546	1	841	14743	4282	76974	519	322
GO:0017111	nucleoside-triphosphatase activity	molecular_function	0.00017	0.010635	817	14743	3744	76974	518	299
GO:0008270	zinc ion binding	molecular_function	0.99921	1	758	14743	4305	76974	511	247
GO:0051252	regulation of RNA metabolic process	biological_process	0.30855	1	827	14743	4247	76974	509	318
GO:2001141	regulation of RNA biosynthetic process	biological_process	0.30855	1	827	14743	4247	76974	509	318
GO:0044711	single-organism biosynthetic process	biological_process	0.012044	0.27191	836	14743	4096	76974	503	333
GO:0006355	regulation of transcription, DNA-templated	biological_process	0.34388	1	817	14743	4209	76974	503	314
GO:1903506	regulation of nucleic acid-templated transcription	biological_process	0.34388	1	817	14743	4209	76974	503	314
GO:1901566	organonitrogen compound biosynthetic process	biological_process	0.8942	1	773	14743	4300	76974	502	271
GO:0044281	small molecule metabolic process	biological_process	0.47489	1	832	14743	4319	76974	501	331
GO:0071840	cellular component organization or biogenesis	biological_process	0.69481	1	791	14743	4217	76974	500	291
GO:0055085	transmembrane transport	biological_process	0.84791	1	817	14743	4369	76974	499	318
GO:0023052	signaling	biological_process	0.000499	0.024642	717	14743	3381	76974	495	222
GO:0044700	single organism signaling	biological_process	0.000545	0.025602	716	14743	3379	76974	494	222
GO:0007165	signal transduction	biological_process	0.000456	0.022889	712	14743	3354	76974	491	221
GO:0044444	cytoplasmic part	cellular_component	0.99403	1	753	14743	4434	76974	483	270
GO:0022857	transmembrane transporter activity	molecular_function	0.96389	1	769	14743	4273	76974	477	292
GO:0016043	cellular component organization	biological_process	0.80778	1	713	14743	3848	76974	447	266
GO:0005975	carbohydrate metabolic process	biological_process	0.98826	1	716	14743	3991	76974	431	285
GO:0048037	cofactor binding	molecular_function	2.44e-12	6.04e-10	669	14743	2751	76974	418	251
GO:0006950	response to stress	biological_process	0.000458	0.022889	602	14743	2838	76974	408	194
GO:0006259	DNA metabolic process	biological_process	0.56893	1	626	14743	3316	76974	404	222
GO:0006811	ion transport	biological_process	0.94156	1	617	14743	3449	76974	391	226
GO:0043531	ADP binding	molecular_function	1.25e-36	5.88e-33	589	14743	1831	76974	380	209
GO:0006082	organic acid metabolic process	biological_process	0.002706	0.086073	635	14743	2963	76974	371	264
GO:0043436	oxoacid metabolic process	biological_process	0.00244	0.080136	634	14743	2954	76974	370	264
GO:0019752	carboxylic acid metabolic process	biological_process	0.002713	0.086073	623	14743	2903	76974	368	255
GO:0071702	organic substance transport	biological_process	0.99998	1	590	14743	3599	76974	365	225
GO:0006629	lipid metabolic process	biological_process	3.92e-13	1.23e-10	621	14743	2512	76974	361	260
GO:0022892	substrate-specific transporter activity	molecular_function	0.97014	1	554	14743	3166	76974	347	207
GO:0050662	coenzyme binding	molecular_function	2.14e-12	5.58e-10	559	14743	2249	76974	337	222
GO:0019001	guanyl nucleotide binding	molecular_function	0.062699	0.72165	473	14743	2293	76974	334	139
GO:0033036	macromolecule localization	biological_process	0.99996	1	531	14743	3238	76974	334	197
GO:0043228	non-membrane-bounded organelle	cellular_component	0.39251	1	528	14743	2836	76974	330	198
GO:0051641	cellular localization	biological_process	0.99979	1	521	14743	3091	76974	330	191
GO:0005525	GTP binding	molecular_function	0.049651	0.60719	466	14743	2247	76974	329	137
GO:0032561	guanyl ribonucleotide binding	molecular_function	0.050914	0.61781	467	14743	2253	76974	329	138
GO:0003723	RNA binding	molecular_function	0.82539	1	513	14743	2765	76974	328	185
GO:0016887	ATPase activity	molecular_function	0.076115	0.81793	501	14743	2414	76974	325	176
GO:0016788	hydrolase activity, acting on ester bonds	molecular_function	0.025816	0.39819	540	14743	2614	76974	324	216
GO:0043232	intracellular non-membrane-bounded organelle	cellular_component	0.60525	1	506	14743	2777	76974	317	189
GO:0022891	substrate-specific transmembrane transporter activity	molecular_function	0.9241	1	509	14743	2859	76974	316	193
GO:0006508	proteolysis	biological_process	0.87656	1	535	14743	2926	76974	312	223
GO:0051649	establishment of localization in cell	biological_process	0.99983	1	492	14743	2936	76974	312	180
GO:0015075	ion transmembrane transporter activity	molecular_function	0.91914	1	488	14743	2732	76974	302	186
GO:0008104	protein localization	biological_process	0.99983	1	477	14743	2877	76974	302	175
GO:0045184	establishment of protein localization	biological_process	0.99981	1	458	14743	2766	76974	290	168
GO:0043603	cellular amide metabolic process	biological_process	0.96265	1	437	14743	2552	76974	287	150
GO:0008233	peptidase activity	molecular_function	0.99991	1	486	14743	2992	76974	286	200
GO:0015031	protein transport	biological_process	0.99988	1	448	14743	2723	76974	284	164
GO:0006812	cation transport	biological_process	0.90433	1	440	14743	2470	76974	281	159
GO:0043604	amide biosynthetic process	biological_process	0.89929	1	425	14743	2431	76974	279	146
GO:0051704	multi-organism process	biological_process	0.7785	1	424	14743	2339	76974	275	149
GO:0046907	intracellular transport	biological_process	0.99997	1	432	14743	2650	76974	272	160
GO:0070011	peptidase activity, acting on L-amino acid peptides	molecular_function	0.99914	1	461	14743	2752	76974	271	190
GO:0006396	RNA processing	biological_process	0.13555	1	423	14743	2084	76974	270	153
GO:0016757	transferase activity, transferring glycosyl groups	molecular_function	0.028914	0.43381	431	14743	2057	76974	262	169
GO:0009056	catabolic process	biological_process	0.45278	1	451	14743	2359	76974	262	189
GO:0034660	ncRNA metabolic process	biological_process	0.033912	0.48112	395	14743	1869	76974	259	136
GO:0003924	GTPase activity	molecular_function	0.000392	0.020943	373	14743	1638	76974	257	116
GO:0006518	peptide metabolic process	biological_process	0.97105	1	392	14743	2318	76974	254	138
GO:0043043	peptide biosynthetic process	biological_process	0.94751	1	385	14743	2252	76974	249	136
GO:0006412	translation	biological_process	0.92331	1	383	14743	2223	76974	248	135
GO:0034613	cellular protein localization	biological_process	0.999	1	387	14743	2293	76974	242	145
GO:0070727	cellular macromolecule localization	biological_process	0.999	1	387	14743	2293	76974	242	145
GO:0098796	membrane protein complex	cellular_component	0.99998	1	378	14743	2439	76974	239	139
GO:0016614	oxidoreductase activity, acting on CH-OH group of donors	molecular_function	1.32e-11	3.05e-09	374	14743	1429	76974	237	137
GO:0016798	hydrolase activity, acting on glycosyl bonds	molecular_function	0.11253	1	391	14743	1916	76974	237	154
GO:0006996	organelle organization	biological_process	0.98127	1	379	14743	2182	76974	235	144
GO:0006520	cellular amino acid metabolic process	biological_process	0.05264	0.63221	367	14743	1748	76974	234	133
GO:0004553	hydrolase activity, hydrolyzing O-glycosyl compounds	molecular_function	0.16675	1	372	14743	1841	76974	232	140
GO:0016616	oxidoreductase activity, acting on the CH-OH group of donors, NAD or NADP as acceptor	molecular_function	2.48e-13	8.95e-11	352	14743	1295	76974	230	122
GO:0006886	intracellular protein transport	biological_process	0.9992	1	358	14743	2137	76974	224	134
GO:0044085	cellular component biogenesis	biological_process	0.5946	1	357	14743	1894	76974	221	136
GO:0006399	tRNA metabolic process	biological_process	0.079543	0.84701	337	14743	1611	76974	219	118
GO:0044428	nuclear part	cellular_component	0.9999	1	312	14743	1993	76974	219	93
GO:1902494	catalytic complex	cellular_component	0.99348	1	316	14743	1915	76974	215	101
GO:0008324	cation transmembrane transporter activity	molecular_function	0.92195	1	348	14743	1991	76974	214	134
GO:0016758	transferase activity, transferring hexosyl groups	molecular_function	0.077752	0.83362	331	14743	1604	76974	207	124
GO:0033554	cellular response to stress	biological_process	0.043364	0.55952	325	14743	1563	76974	206	119
GO:0003700	transcription factor activity, sequence-specific DNA binding	molecular_function	0.35759	1	309	14743	1587	76974	206	103
GO:0001071	nucleic acid binding transcription factor activity	molecular_function	0.38965	1	309	14743	1594	76974	206	103
GO:0046906	tetrapyrrole binding	molecular_function	1.82e-07	2.12e-05	291	14743	1170	76974	199	92
GO:0006974	cellular response to DNA damage stimulus	biological_process	0.011796	0.26874	315	14743	1460	76974	198	117
GO:0020037	heme binding	molecular_function	6.66e-08	8.45e-06	287	14743	1139	76974	197	90
GO:0016192	vesicle-mediated transport	biological_process	0.99409	1	299	14743	1729	76974	197	102
GO:0022890	inorganic cation transmembrane transporter activity	molecular_function	0.77316	1	323	14743	1794	76974	195	128
GO:1901135	carbohydrate derivative metabolic process	biological_process	0.99886	1	326	14743	2000	76974	192	134
GO:0008610	lipid biosynthetic process	biological_process	5.34e-10	8.35e-08	347	14743	1357	76974	191	156
GO:1901575	organic substance catabolic process	biological_process	0.062621	0.72165	329	14743	1606	76974	191	138
GO:0044248	cellular catabolic process	biological_process	0.89296	1	325	14743	1820	76974	190	135
GO:0005509	calcium ion binding	molecular_function	4.51e-08	6.05e-06	272	14743	1082	76974	188	84
GO:0006281	DNA repair	biological_process	0.035805	0.49758	295	14743	1392	76974	188	107
GO:0016741	transferase activity, transferring one-carbon groups	molecular_function	0.26036	1	303	14743	1544	76974	187	116
GO:0005198	structural molecule activity	molecular_function	0.9877	1	309	14743	1920	76974	187	122
GO:0044283	small molecule biosynthetic process	biological_process	0.006261	0.168	320	14743	1460	76974	185	135
GO:0034470	ncRNA processing	biological_process	0.006301	0.16812	288	14743	1302	76974	185	103
GO:0044723	single-organism carbohydrate metabolic process	biological_process	0.99752	1	318	14743	1896	76974	185	133
GO:0005506	iron ion binding	molecular_function	2.35e-05	0.001937	293	14743	1224	76974	183	110
GO:0016705	oxidoreductase activity, acting on paired donors, with incorporation or reduction of molecular oxygen	molecular_function	4.98e-08	6.5e-06	274	14743	1064	76974	181	93
GO:0008168	methyltransferase activity	molecular_function	0.21772	1	292	14743	1477	76974	181	111
GO:0030001	metal ion transport	biological_process	0.34001	1	258	14743	1352	76974	181	77
GO:0016829	lyase activity	molecular_function	0.51312	1	275	14743	1444	76974	180	95
GO:0005576	extracellular region	cellular_component	0.25174	1	271	14743	1390	76974	178	93
GO:0043933	macromolecular complex subunit organization	biological_process	0.67287	1	287	14743	1542	76974	178	109
GO:0019637	organophosphate metabolic process	biological_process	0.9878	1	299	14743	1762	76974	176	123
GO:0015672	monovalent inorganic cation transport	biological_process	0.82154	1	271	14743	1501	76974	175	96
GO:0030529	ribonucleoprotein complex	cellular_component	0.86437	1	261	14743	1564	76974	175	86
GO:0044255	cellular lipid metabolic process	biological_process	0.004605	0.12645	321	14743	1461	76974	173	148
GO:0004842	ubiquitin-protein transferase activity	molecular_function	0.00113	0.045754	222	14743	949	76974	171	51
GO:0019787	ubiquitin-like protein transferase activity	molecular_function	0.00113	0.045754	222	14743	949	76974	171	51
GO:0022607	cellular component assembly	biological_process	0.76001	1	276	14743	1502	76974	167	109
GO:0031090	organelle membrane	cellular_component	0.99964	1	253	14743	1629	76974	164	89
GO:0004386	helicase activity	molecular_function	0.022707	0.37484	259	14743	1175	76974	163	96
GO:0016053	organic acid biosynthetic process	biological_process	0.00013	0.008477	276	14743	1165	76974	158	118
GO:0046394	carboxylic acid biosynthetic process	biological_process	0.00013	0.008477	276	14743	1165	76974	158	118
GO:0044877	macromolecular complex binding	molecular_function	0.32605	1	233	14743	1177	76974	156	77
GO:0012505	endomembrane system	cellular_component	0.99994	1	232	14743	1520	76974	156	76
GO:0035556	intracellular signal transduction	biological_process	0.93637	1	230	14743	1316	76974	154	76
GO:0051186	cofactor metabolic process	biological_process	0.11983	1	245	14743	1190	76974	153	92
GO:1902582	single-organism intracellular transport	biological_process	0.98621	1	233	14743	1385	76974	151	82
GO:1990234	transferase complex	cellular_component	0.99177	1	213	14743	1309	76974	149	64
GO:0008033	tRNA processing	biological_process	0.018072	0.32107	230	14743	1044	76974	145	85
GO:0071944	cell periphery	cellular_component	0.82473	1	223	14743	1257	76974	145	78
GO:0032501	multicellular organismal process	biological_process	0.24434	1	214	14743	1065	76974	144	70
GO:0004175	endopeptidase activity	molecular_function	0.99992	1	251	14743	1639	76974	144	107
GO:0006310	DNA recombination	biological_process	0.020747	0.35046	217	14743	985	76974	143	74
GO:0016874	ligase activity	molecular_function	0.93304	1	206	14743	1149	76974	140	66
GO:0071822	protein complex subunit organization	biological_process	0.58043	1	225	14743	1188	76974	138	87
GO:0016779	nucleotidyltransferase activity	molecular_function	0.98025	1	240	14743	1436	76974	136	104
GO:0098588	bounding membrane of organelle	cellular_component	0.99894	1	203	14743	1304	76974	135	68
GO:0065003	macromolecular complex assembly	biological_process	0.48353	1	216	14743	1125	76974	134	82
GO:0016746	transferase activity, transferring acyl groups	molecular_function	0.007532	0.19434	230	14743	1045	76974	132	98
GO:0051287	NAD binding	molecular_function	1.09e-07	1.31e-05	207	14743	782	76974	130	77
GO:0044764	multi-organism cellular process	biological_process	0.67712	1	210	14743	1160	76974	130	80
GO:0043565	sequence-specific DNA binding	molecular_function	0.18406	1	185	14743	907	76974	127	58
GO:0006461	protein complex assembly	biological_process	0.47464	1	208	14743	1079	76974	127	81
GO:0070271	protein complex biogenesis	biological_process	0.48085	1	208	14743	1080	76974	127	81
GO:0008236	serine-type peptidase activity	molecular_function	0.52043	1	230	14743	1205	76974	126	104
GO:0017171	serine hydrolase activity	molecular_function	0.52043	1	230	14743	1205	76974	126	104
GO:0006260	DNA replication	biological_process	0.99383	1	196	14743	1228	76974	126	70
GO:0005694	chromosome	cellular_component	0.038945	0.51824	192	14743	891	76974	125	67
GO:0015077	monovalent inorganic cation transmembrane transporter activity	molecular_function	0.69169	1	214	14743	1176	76974	124	90
GO:0022804	active transmembrane transporter activity	molecular_function	0.35296	1	227	14743	1145	76974	123	104
GO:0034220	ion transmembrane transport	biological_process	0.9397	1	219	14743	1280	76974	121	98
GO:0032787	monocarboxylic acid metabolic process	biological_process	0.010169	0.23757	239	14743	1073	76974	120	119
GO:0065008	regulation of biological quality	biological_process	0.86174	1	209	14743	1225	76974	120	89
GO:0046983	protein dimerization activity	molecular_function	0.46102	1	196	14743	1011	76974	119	77
GO:0042578	phosphoric ester hydrolase activity	molecular_function	0.090594	0.92084	191	14743	895	76974	118	73
GO:0044403	symbiosis, encompassing mutualism through parasitism	biological_process	0.88638	1	198	14743	1144	76974	118	80
GO:0044419	interspecies interaction between organisms	biological_process	0.89111	1	198	14743	1146	76974	118	80
GO:1902589	single-organism organelle organization	biological_process	0.9739	1	193	14743	1134	76974	118	75
GO:1901605	alpha-amino acid metabolic process	biological_process	0.033727	0.48099	192	14743	882	76974	117	75
GO:0003735	structural constituent of ribosome	molecular_function	0.67662	1	182	14743	1095	76974	117	65
GO:0005840	ribosome	cellular_component	0.74148	1	179	14743	1090	76974	115	64
GO:0055086	nucleobase-containing small molecule metabolic process	biological_process	0.99586	1	204	14743	1269	76974	115	89
GO:0006732	coenzyme metabolic process	biological_process	0.10243	0.98976	174	14743	826	76974	114	60
GO:0051276	chromosome organization	biological_process	0.66802	1	175	14743	945	76974	114	61
GO:1901137	carbohydrate derivative biosynthetic process	biological_process	0.99997	1	174	14743	1205	76974	114	60
GO:0032403	protein complex binding	molecular_function	0.37629	1	178	14743	902	76974	113	65
GO:0051188	cofactor biosynthetic process	biological_process	0.43354	1	148	14743	756	76974	112	36
GO:0008092	cytoskeletal protein binding	molecular_function	0.037561	0.51126	209	14743	962	76974	111	98
GO:0008652	cellular amino acid biosynthetic process	biological_process	0.001223	0.049099	171	14743	716	76974	109	62
GO:0046873	metal ion transmembrane transporter activity	molecular_function	0.96506	1	166	14743	1009	76974	109	57
GO:0004871	signal transducer activity	molecular_function	0.99588	1	164	14743	1049	76974	109	55
GO:0060089	molecular transducer activity	molecular_function	0.99815	1	166	14743	1078	76974	109	57
GO:0031974	membrane-enclosed lumen	cellular_component	1	1	162	14743	1215	76974	109	53
GO:0034622	cellular macromolecular complex assembly	biological_process	0.49094	1	174	14743	910	76974	108	66
GO:0043233	organelle lumen	cellular_component	1	1	161	14743	1207	76974	108	53
GO:0070013	intracellular organelle lumen	cellular_component	1	1	161	14743	1207	76974	108	53
GO:0003678	DNA helicase activity	molecular_function	0.005496	0.14918	177	14743	755	76974	107	70
GO:0016032	viral process	biological_process	0.43319	1	177	14743	915	76974	107	70
GO:0019012	virion	cellular_component	0.61629	1	172	14743	919	76974	106	66
GO:0016482	cytoplasmic transport	biological_process	0.87685	1	162	14743	922	76974	105	57
GO:0044427	chromosomal part	cellular_component	0.14951	1	159	14743	770	76974	104	55
GO:0098772	molecular function regulator	molecular_function	0.95467	1	165	14743	985	76974	102	63
GO:0090407	organophosphate biosynthetic process	biological_process	0.99975	1	159	14743	1069	76974	102	57
GO:0006694	steroid biosynthetic process	biological_process	3.84e-19	9.02e-16	161	14743	439	76974	101	60
GO:0008202	steroid metabolic process	biological_process	2.52e-18	3.95e-15	161	14743	448	76974	101	60
GO:0009117	nucleotide metabolic process	biological_process	0.98193	1	181	14743	1091	76974	101	80
GO:0006753	nucleoside phosphate metabolic process	biological_process	0.98294	1	181	14743	1093	76974	101	80
GO:0031981	nuclear lumen	cellular_component	1	1	154	14743	1151	76974	101	53
GO:0042221	response to chemical	biological_process	3.44e-05	0.002692	179	14743	724	76974	100	79
GO:0044421	extracellular region part	cellular_component	9.31e-05	0.006828	150	14743	603	76974	99	51
GO:0044423	virion part	cellular_component	0.66228	1	163	14743	879	76974	99	64
GO:0016853	isomerase activity	molecular_function	0.85598	1	151	14743	879	76974	99	52
GO:0007049	cell cycle	biological_process	0.95574	1	176	14743	1036	76974	99	77
GO:0050660	flavin adenine dinucleotide binding	molecular_function	0.011836	0.26874	166	14743	724	76974	98	68
GO:0044262	cellular carbohydrate metabolic process	biological_process	0.99304	1	152	14743	944	76974	98	54
GO:0003854	3-beta-hydroxy-delta5-steroid dehydrogenase activity	molecular_function	7.49e-18	5.86e-15	155	14743	428	76974	96	59
GO:0016229	steroid dehydrogenase activity	molecular_function	7.49e-18	5.86e-15	155	14743	428	76974	96	59
GO:0033764	steroid dehydrogenase activity, acting on the CH-OH group of donors, NAD or NADP as acceptor	molecular_function	7.49e-18	5.86e-15	155	14743	428	76974	96	59
GO:0043623	cellular protein complex assembly	biological_process	0.47881	1	157	14743	814	76974	96	61
GO:0005739	mitochondrion	cellular_component	0.57309	1	141	14743	774	76974	96	45
GO:0009057	macromolecule catabolic process	biological_process	0.62705	1	157	14743	853	76974	96	61
GO:1901607	alpha-amino acid biosynthetic process	biological_process	0.004463	0.12327	147	14743	625	76974	95	52
GO:0000152	nuclear ubiquitin ligase complex	cellular_component	0.009516	0.22596	127	14743	549	76974	95	32
GO:0005680	anaphase-promoting complex	cellular_component	0.009516	0.22596	127	14743	549	76974	95	32
GO:0031461	cullin-RING ubiquitin ligase complex	cellular_component	0.009516	0.22596	127	14743	549	76974	95	32
GO:0000151	ubiquitin ligase complex	cellular_component	0.021303	0.35601	127	14743	563	76974	95	32
GO:0016747	transferase activity, transferring acyl groups other than amino-acyl groups	molecular_function	0.015011	0.2987	163	14743	731	76974	94	69
GO:0098655	cation transmembrane transport	biological_process	0.96981	1	172	14743	1044	76974	93	79
GO:0006820	anion transport	biological_process	0.8781	1	140	14743	799	76974	92	48
GO:0098662	inorganic cation transmembrane transport	biological_process	0.97124	1	171	14743	1040	76974	92	79
GO:0098660	inorganic ion transmembrane transport	biological_process	0.97224	1	171	14743	1041	76974	92	79
GO:0006091	generation of precursor metabolites and energy	biological_process	0.07204	0.79461	163	14743	767	76974	91	72
GO:0009116	nucleoside metabolic process	biological_process	0.98338	1	163	14743	1003	76974	91	72
GO:1901657	glycosyl compound metabolic process	biological_process	0.98402	1	163	14743	1004	76974	91	72
GO:0006631	fatty acid metabolic process	biological_process	0.009872	0.2318	174	14743	760	76974	90	84
GO:0030246	carbohydrate binding	molecular_function	0.075074	0.8142	125	14743	567	76974	90	35
GO:0009108	coenzyme biosynthetic process	biological_process	0.080978	0.85226	112	14743	513	76974	90	22
GO:0004518	nuclease activity	molecular_function	0.96714	1	135	14743	818	76974	90	45
GO:0009451	RNA modification	biological_process	0.62266	1	142	14743	748	76974	89	53
GO:0016051	carbohydrate biosynthetic process	biological_process	0.98106	1	145	14743	882	76974	89	56
GO:0072521	purine-containing compound metabolic process	biological_process	0.96956	1	154	14743	927	76974	88	66
GO:0016791	phosphatase activity	molecular_function	0.10428	1	145	14743	676	76974	87	58
GO:0030234	enzyme regulator activity	molecular_function	0.93631	1	142	14743	849	76974	87	55
GO:0009378	four-way junction helicase activity	molecular_function	0.001924	0.071158	135	14743	543	76974	86	49
GO:0019693	ribose phosphate metabolic process	biological_process	0.94688	1	156	14743	923	76974	86	70
GO:0022414	reproductive process	biological_process	0.094337	0.94457	115	14743	521	76974	85	30
GO:0007264	small GTPase mediated signal transduction	biological_process	0.85106	1	122	14743	702	76974	85	37
GO:0006163	purine nucleotide metabolic process	biological_process	0.95218	1	150	14743	892	76974	85	65
GO:0009150	purine ribonucleotide metabolic process	biological_process	0.93743	1	148	14743	873	76974	84	64
GO:0009259	ribonucleotide metabolic process	biological_process	0.93873	1	149	14743	880	76974	84	65
GO:0044703	multi-organism reproductive process	biological_process	0.03814	0.51467	112	14743	487	76974	83	29
GO:0098805	whole membrane	cellular_component	0.93327	1	131	14743	770	76974	83	48
GO:0009119	ribonucleoside metabolic process	biological_process	0.97183	1	146	14743	893	76974	82	64
GO:0005856	cytoskeleton	cellular_component	0.97224	1	142	14743	842	76974	82	60
GO:0006813	potassium ion transport	biological_process	0.000882	0.03836	108	14743	421	76974	81	27
GO:0015078	hydrogen ion transmembrane transporter activity	molecular_function	0.48957	1	150	14743	795	76974	81	69
GO:0070647	protein modification by small protein conjugation or removal	biological_process	0.73354	1	112	14743	597	76974	81	31
GO:0042278	purine nucleoside metabolic process	biological_process	0.93022	1	145	14743	852	76974	81	64
GO:0046128	purine ribonucleoside metabolic process	biological_process	0.93022	1	145	14743	852	76974	81	64
GO:0044712	single-organism catabolic process	biological_process	0.12333	1	148	14743	709	76974	79	69
GO:0044430	cytoskeletal part	cellular_component	0.94601	1	138	14743	802	76974	79	59
GO:0008037	cell recognition	biological_process	0.001267	0.050015	102	14743	388	76974	78	24
GO:0042623	ATPase activity, coupled	molecular_function	0.17607	1	147	14743	707	76974	77	70
GO:1902580	single-organism cellular localization	biological_process	0.77355	1	117	14743	660	76974	77	40
GO:0009856	pollination	biological_process	0.002122	0.073809	99	14743	380	76974	76	23
GO:0009875	pollen-pistil interaction	biological_process	0.002122	0.073809	99	14743	380	76974	76	23
GO:0048544	recognition of pollen	biological_process	0.002122	0.073809	99	14743	380	76974	76	23
GO:0044706	multi-multicellular organism process	biological_process	0.002602	0.083698	100	14743	387	76974	76	24
GO:0061024	membrane organization	biological_process	0.27627	1	113	14743	568	76974	76	37
GO:0031975	envelope	cellular_component	0.92619	1	118	14743	709	76974	76	42
GO:0006952	defense response	biological_process	0.008856	0.21858	101	14743	439	76974	75	26
GO:0016835	carbon-oxygen lyase activity	molecular_function	0.20042	1	113	14743	541	76974	75	38
GO:0003724	RNA helicase activity	molecular_function	0.31417	1	111	14743	540	76974	74	37
GO:0043038	amino acid activation	biological_process	0.70529	1	107	14743	567	76974	74	33
GO:0043039	tRNA aminoacylation	biological_process	0.70529	1	107	14743	567	76974	74	33
GO:0005216	ion channel activity	molecular_function	0.70813	1	116	14743	631	76974	74	42
GO:0022838	substrate-specific channel activity	molecular_function	0.70813	1	116	14743	631	76974	74	42
GO:0015267	channel activity	molecular_function	0.71312	1	116	14743	632	76974	74	42
GO:0022803	passive transmembrane transporter activity	molecular_function	0.71312	1	116	14743	632	76974	74	42
GO:0044265	cellular macromolecule catabolic process	biological_process	0.59133	1	117	14743	628	76974	73	44
GO:0007186	G-protein coupled receptor signaling pathway	biological_process	0.79297	1	97	14743	571	76974	73	24
GO:0033365	protein localization to organelle	biological_process	0.9139	1	112	14743	663	76974	73	39
GO:0016071	mRNA metabolic process	biological_process	0.9301	1	111	14743	652	76974	73	38
GO:0019058	viral life cycle	biological_process	0.48221	1	121	14743	628	76974	72	49
GO:0006605	protein targeting	biological_process	0.88147	1	110	14743	643	76974	72	38
GO:0031967	organelle envelope	cellular_component	0.94043	1	111	14743	676	76974	72	39
GO:0098687	chromosomal region	cellular_component	0.275	1	100	14743	491	76974	71	29
GO:0016875	ligase activity, forming carbon-oxygen bonds	molecular_function	0.79644	1	103	14743	560	76974	71	32
GO:0016876	ligase activity, forming aminoacyl-tRNA and related compounds	molecular_function	0.79644	1	103	14743	560	76974	71	32
GO:0032502	developmental process	biological_process	0.97294	1	121	14743	751	76974	71	50
GO:0034637	cellular carbohydrate biosynthetic process	biological_process	0.97335	1	110	14743	676	76974	71	39
GO:0005976	polysaccharide metabolic process	biological_process	0.98777	1	106	14743	678	76974	71	35
GO:0006914	autophagy	biological_process	0.99301	1	122	14743	774	76974	71	51
GO:0005783	endoplasmic reticulum	cellular_component	0.99903	1	103	14743	728	76974	71	32
GO:0031012	extracellular matrix	cellular_component	6.94e-08	8.58e-06	94	14743	310	76974	70	24
GO:0000775	chromosome, centromeric region	cellular_component	0.25286	1	99	14743	483	76974	70	29
GO:0008134	transcription factor binding	molecular_function	0.82506	1	118	14743	650	76974	70	48
GO:0019028	viral capsid	cellular_component	0.88469	1	116	14743	669	76974	70	46
GO:0030117	membrane coat	cellular_component	0.99338	1	117	14743	736	76974	70	47
GO:0048475	coated membrane	cellular_component	0.99338	1	117	14743	736	76974	70	47
GO:0006818	hydrogen transport	biological_process	0.99793	1	131	14743	858	76974	70	61
GO:0015992	proton transport	biological_process	0.99793	1	131	14743	858	76974	70	61
GO:0016209	antioxidant activity	molecular_function	0.000402	0.021063	108	14743	435	76974	69	39
GO:0016701	oxidoreductase activity, acting on single donors with incorporation of molecular oxygen	molecular_function	0.014714	0.29741	103	14743	437	76974	69	34
GO:0030170	pyridoxal phosphate binding	molecular_function	0.085511	0.88795	90	14743	404	76974	69	21
GO:0044802	single-organism membrane organization	biological_process	0.26921	1	102	14743	512	76974	69	33
GO:0006400	tRNA modification	biological_process	0.43592	1	114	14743	576	76974	69	45
GO:0008289	lipid binding	molecular_function	0.62317	1	108	14743	571	76974	69	39
GO:0044429	mitochondrial part	cellular_component	0.74507	1	106	14743	607	76974	69	37
GO:0005578	proteinaceous extracellular matrix	cellular_component	1.04e-08	1.43e-06	92	14743	291	76974	68	24
GO:0042592	homeostatic process	biological_process	0.77859	1	125	14743	751	76974	68	57
GO:0072594	establishment of protein localization to organelle	biological_process	0.8102	1	104	14743	593	76974	68	36
GO:0007010	cytoskeleton organization	biological_process	0.89025	1	121	14743	689	76974	68	53
GO:0016627	oxidoreductase activity, acting on the CH-CH group of donors	molecular_function	0.095622	0.95136	112	14743	523	76974	67	45
GO:0006418	tRNA aminoacylation for protein translation	biological_process	0.76509	1	97	14743	523	76974	67	30
GO:0019867	outer membrane	cellular_component	0.1481	1	97	14743	461	76974	66	31
GO:0016820	hydrolase activity, acting on acid anhydrides, catalyzing transmembrane movement of substances	molecular_function	0.60499	1	120	14743	638	76974	66	54
GO:0044707	single-multicellular organism process	biological_process	0.79591	1	110	14743	624	76974	66	44
GO:0004812	aminoacyl-tRNA ligase activity	molecular_function	0.84042	1	96	14743	531	76974	66	30
GO:0034062	RNA polymerase activity	molecular_function	0.99941	1	110	14743	789	76974	65	45
GO:0015631	tubulin binding	molecular_function	0.005477	0.14918	117	14743	480	76974	64	53
GO:0005740	mitochondrial envelope	cellular_component	0.64972	1	101	14743	565	76974	64	37
GO:0048193	Golgi vesicle transport	biological_process	0.89296	1	97	14743	558	76974	64	33
GO:0044767	single-organism developmental process	biological_process	0.96293	1	113	14743	698	76974	64	49
GO:0015979	photosynthesis	biological_process	0.3586	1	92	14743	504	76974	63	29
GO:0015399	primary active transmembrane transporter activity	molecular_function	0.4572	1	113	14743	576	76974	63	50
GO:0015405	P-P-bond-hydrolysis-driven transmembrane transporter activity	molecular_function	0.4572	1	113	14743	576	76974	63	50
GO:0031966	mitochondrial membrane	cellular_component	0.63977	1	99	14743	551	76974	63	36
GO:0022402	cell cycle process	biological_process	0.9652	1	108	14743	654	76974	63	45
GO:0009165	nucleotide biosynthetic process	biological_process	0.98365	1	98	14743	626	76974	63	35
GO:1901293	nucleoside phosphate biosynthetic process	biological_process	0.98365	1	98	14743	626	76974	63	35
GO:0016702	oxidoreductase activity, acting on single donors with incorporation of molecular oxygen, incorporation of two atoms of oxygen	molecular_function	0.009467	0.22596	84	14743	341	76974	61	23
GO:0051213	dioxygenase activity	molecular_function	0.03776	0.51249	86	14743	371	76974	61	25
GO:0008509	anion transmembrane transporter activity	molecular_function	0.87939	1	90	14743	521	76974	60	30
GO:0008194	UDP-glycosyltransferase activity	molecular_function	0.99999	1	98	14743	732	76974	60	38
GO:0006928	movement of cell or subcellular component	biological_process	0.036229	0.50186	112	14743	496	76974	59	53
GO:0033013	tetrapyrrole metabolic process	biological_process	0.31462	1	102	14743	510	76974	59	43
GO:0032446	protein modification by small protein conjugation	biological_process	0.46265	1	76	14743	382	76974	59	17
GO:0051082	unfolded protein binding	molecular_function	0.61836	1	83	14743	446	76974	59	24
GO:0071705	nitrogen compound transport	biological_process	0.82972	1	98	14743	571	76974	59	39
GO:0004674	protein serine/threonine kinase activity	molecular_function	0.90323	1	95	14743	543	76974	59	36
GO:0008238	exopeptidase activity	molecular_function	0.94519	1	92	14743	548	76974	59	33
GO:0005886	plasma membrane	cellular_component	0.9995	1	98	14743	712	76974	59	39
GO:0005654	nucleoplasm	cellular_component	1	1	94	14743	780	76974	59	35
GO:0044451	nucleoplasm part	cellular_component	1	1	94	14743	780	76974	59	35
GO:0015291	secondary active transmembrane transporter activity	molecular_function	0.29311	1	108	14743	526	76974	58	50
GO:0003899	DNA-directed RNA polymerase activity	molecular_function	0.99332	1	94	14743	653	76974	58	36
GO:0006457	protein folding	biological_process	0.56953	1	90	14743	489	76974	57	33
GO:0071949	FAD binding	molecular_function	0.003666	0.1076	90	14743	355	76974	56	34
GO:0000287	magnesium ion binding	molecular_function	0.025862	0.39819	104	14743	451	76974	56	48
GO:0019725	cellular homeostasis	biological_process	0.37382	1	103	14743	551	76974	56	47
GO:0030163	protein catabolic process	biological_process	0.55607	1	90	14743	482	76974	56	34
GO:0005102	receptor binding	molecular_function	0.78762	1	99	14743	550	76974	56	43
GO:0016469	proton-transporting two-sector ATPase complex	cellular_component	0.90783	1	102	14743	611	76974	56	46
GO:0090150	establishment of protein localization to membrane	biological_process	0.24572	1	76	14743	377	76974	55	21
GO:0072657	protein localization to membrane	biological_process	0.26877	1	76	14743	380	76974	55	21
GO:0016567	protein ubiquitination	biological_process	0.41349	1	72	14743	357	76974	55	17
GO:0016830	carbon-carbon lyase activity	molecular_function	0.98137	1	85	14743	550	76974	55	30
GO:0044264	cellular polysaccharide metabolic process	biological_process	0.99379	1	81	14743	545	76974	55	26
GO:1902600	hydrogen ion transmembrane transport	biological_process	0.99521	1	105	14743	696	76974	55	50
GO:0009055	electron carrier activity	molecular_function	0.023783	0.3838	102	14743	479	76974	54	48
GO:0022613	ribonucleoprotein complex biogenesis	biological_process	0.22582	1	80	14743	390	76974	54	26
GO:0044257	cellular protein catabolic process	biological_process	0.49809	1	88	14743	464	76974	54	34
GO:0051603	proteolysis involved in cellular protein catabolic process	biological_process	0.49809	1	88	14743	464	76974	54	34
GO:0006397	mRNA processing	biological_process	0.94937	1	82	14743	498	76974	54	28
GO:0016903	oxidoreductase activity, acting on the aldehyde or oxo group of donors	molecular_function	2.7e-06	0.000276	81	14743	263	76974	53	28
GO:0052689	carboxylic ester hydrolase activity	molecular_function	0.001666	0.062601	94	14743	372	76974	53	41
GO:0009308	amine metabolic process	biological_process	0.017426	0.31841	77	14743	319	76974	53	24
GO:0048519	negative regulation of biological process	biological_process	0.01772	0.32076	106	14743	458	76974	53	53
GO:0048518	positive regulation of biological process	biological_process	0.91952	1	82	14743	495	76974	53	29
GO:0098519	nucleotide phosphatase activity, acting on free nucleotides	molecular_function	0.017568	0.31976	74	14743	299	76974	52	22
GO:0042626	ATPase activity, coupled to transmembrane movement of substances	molecular_function	0.29545	1	96	14743	472	76974	52	44
GO:0043492	ATPase activity, coupled to movement of substances	molecular_function	0.29545	1	96	14743	472	76974	52	44
GO:0070085	glycosylation	biological_process	0.39138	1	84	14743	421	76974	52	32
GO:0072522	purine-containing compound biosynthetic process	biological_process	0.99091	1	78	14743	523	76974	52	26
GO:0038023	signaling receptor activity	molecular_function	0.99769	1	88	14743	613	76974	52	36
GO:0004872	receptor activity	molecular_function	0.99921	1	90	14743	642	76974	52	38
GO:0022836	gated channel activity	molecular_function	0.5783	1	74	14743	393	76974	51	23
GO:0042802	identical protein binding	molecular_function	0.90814	1	88	14743	510	76974	51	37
GO:0006073	cellular glucan metabolic process	biological_process	0.9946	1	77	14743	524	76974	51	26
GO:0044042	glucan metabolic process	biological_process	0.9946	1	77	14743	524	76974	51	26
GO:0051536	iron-sulfur cluster binding	molecular_function	0.00102	0.042769	84	14743	324	76974	50	34
GO:0051540	metal cluster binding	molecular_function	0.00102	0.042769	84	14743	324	76974	50	34
GO:0032259	methylation	biological_process	0.58783	1	82	14743	450	76974	50	32
GO:0009579	thylakoid	cellular_component	0.77288	1	71	14743	441	76974	50	21
GO:0044436	thylakoid part	cellular_component	0.77288	1	71	14743	441	76974	50	21
GO:0048522	positive regulation of cellular process	biological_process	0.89974	1	78	14743	467	76974	50	28
GO:0016684	oxidoreductase activity, acting on peroxide as acceptor	molecular_function	0.000367	0.019782	69	14743	254	76974	49	20
GO:0072330	monocarboxylic acid biosynthetic process	biological_process	0.020847	0.35089	105	14743	447	76974	49	56
GO:0015980	energy derivation by oxidation of organic compounds	biological_process	0.13036	1	78	14743	362	76974	49	29
GO:0007017	microtubule-based process	biological_process	0.18505	1	100	14743	473	76974	49	51
GO:0009521	photosystem	cellular_component	0.47634	1	70	14743	401	76974	49	21
GO:0070008	serine-type exopeptidase activity	molecular_function	0.6129	1	76	14743	404	76974	49	27
GO:0034357	photosynthetic membrane	cellular_component	0.7255	1	70	14743	429	76974	49	21
GO:0000003	reproduction	biological_process	0.89366	1	74	14743	448	76974	49	25
GO:0006164	purine nucleotide biosynthetic process	biological_process	0.98257	1	74	14743	488	76974	49	25
GO:0032268	regulation of cellular protein metabolic process	biological_process	0.99706	1	80	14743	533	76974	49	31
GO:0051246	regulation of protein metabolic process	biological_process	0.99852	1	80	14743	544	76974	49	31
GO:0004601	peroxidase activity	molecular_function	0.000407	0.021063	67	14743	246	76974	48	19
GO:0042254	ribosome biogenesis	biological_process	0.27599	1	73	14743	361	76974	48	25
GO:0006511	ubiquitin-dependent protein catabolic process	biological_process	0.52718	1	76	14743	400	76974	48	28
GO:0019941	modification-dependent protein catabolic process	biological_process	0.54739	1	76	14743	402	76974	48	28
GO:0043632	modification-dependent macromolecule catabolic process	biological_process	0.54739	1	76	14743	402	76974	48	28
GO:0016831	carboxy-lyase activity	molecular_function	0.8488	1	72	14743	426	76974	48	24
GO:0009152	purine ribonucleotide biosynthetic process	biological_process	0.97401	1	72	14743	469	76974	48	24
GO:0009260	ribonucleotide biosynthetic process	biological_process	0.97455	1	73	14743	476	76974	48	25
GO:0046390	ribose phosphate biosynthetic process	biological_process	0.97455	1	73	14743	476	76974	48	25
GO:0000988	transcription factor activity, protein binding	molecular_function	0.99822	1	75	14743	539	76974	48	27
GO:0040011	locomotion	biological_process	0.31767	1	83	14743	414	76974	47	36
GO:0008135	translation factor activity, RNA binding	molecular_function	0.50344	1	69	14743	368	76974	47	22
GO:0002949	tRNA threonylcarbamoyladenosine modification	biological_process	0.51022	1	73	14743	369	76974	47	26
GO:0070525	tRNA threonylcarbamoyladenosine metabolic process	biological_process	0.51022	1	73	14743	369	76974	47	26
GO:0015698	inorganic anion transport	biological_process	0.77051	1	64	14743	354	76974	47	17
GO:0009126	purine nucleoside monophosphate metabolic process	biological_process	0.98959	1	101	14743	655	76974	47	54
GO:0009167	purine ribonucleoside monophosphate metabolic process	biological_process	0.98959	1	101	14743	655	76974	47	54
GO:0009161	ribonucleoside monophosphate metabolic process	biological_process	0.9898	1	102	14743	662	76974	47	55
GO:0009123	nucleoside monophosphate metabolic process	biological_process	0.99102	1	102	14743	665	76974	47	55
GO:0009163	nucleoside biosynthetic process	biological_process	0.99429	1	71	14743	498	76974	47	24
GO:0042455	ribonucleoside biosynthetic process	biological_process	0.99429	1	71	14743	498	76974	47	24
GO:1901659	glycosyl compound biosynthetic process	biological_process	0.99464	1	71	14743	499	76974	47	24
GO:0008017	microtubule binding	molecular_function	0.014756	0.29741	84	14743	344	76974	46	38
GO:0015297	antiporter activity	molecular_function	0.037143	0.50713	90	14743	383	76974	46	44
GO:0045333	cellular respiration	biological_process	0.057411	0.67739	74	14743	327	76974	46	28
GO:0043566	structure-specific DNA binding	molecular_function	0.76799	1	67	14743	371	76974	46	21
GO:0042451	purine nucleoside biosynthetic process	biological_process	0.97782	1	70	14743	459	76974	46	24
GO:0046129	purine ribonucleoside biosynthetic process	biological_process	0.97782	1	70	14743	459	76974	46	24
GO:0044432	endoplasmic reticulum part	cellular_component	0.99921	1	62	14743	479	76974	46	16
GO:0006366	transcription from RNA polymerase II promoter	biological_process	0.99998	1	72	14743	582	76974	46	26
GO:0006633	fatty acid biosynthetic process	biological_process	0.022877	0.37484	99	14743	420	76974	45	54
GO:0044448	cell cortex part	cellular_component	0.052031	0.62974	64	14743	269	76974	45	19
GO:0005938	cell cortex	cellular_component	0.075865	0.81712	64	14743	275	76974	45	19
GO:0019439	aromatic compound catabolic process	biological_process	0.10165	0.98634	76	14743	349	76974	45	31
GO:1901361	organic cyclic compound catabolic process	biological_process	0.14452	1	76	14743	359	76974	45	31
GO:0009311	oligosaccharide metabolic process	biological_process	0.43269	1	77	14743	389	76974	45	32
GO:0046903	secretion	biological_process	0.50502	1	66	14743	340	76974	45	21
GO:0015630	microtubule cytoskeleton	cellular_component	0.67636	1	72	14743	390	76974	45	27
GO:0008234	cysteine-type peptidase activity	molecular_function	0.69861	1	68	14743	379	76974	45	23
GO:0009605	response to external stimulus	biological_process	0.99442	1	65	14743	482	76974	45	20
GO:0008237	metallopeptidase activity	molecular_function	0.99984	1	69	14743	504	76974	45	24
GO:0009892	negative regulation of metabolic process	biological_process	0.000747	0.034372	87	14743	328	76974	44	43
GO:0043414	macromolecule methylation	biological_process	0.36965	1	70	14743	366	76974	44	26
GO:0032940	secretion by cell	biological_process	0.52435	1	65	14743	336	76974	44	21
GO:0009607	response to biotic stimulus	biological_process	0.86207	1	68	14743	442	76974	44	24
GO:0004252	serine-type endopeptidase activity	molecular_function	0.98324	1	90	14743	572	76974	44	46
GO:0046527	glucosyltransferase activity	molecular_function	0.99998	1	72	14743	563	76974	44	28
GO:0030312	external encapsulating structure	cellular_component	0.080993	0.85226	63	14743	281	76974	43	20
GO:0005507	copper ion binding	molecular_function	0.39397	1	63	14743	318	76974	43	20
GO:0008171	O-methyltransferase activity	molecular_function	4.85e-06	0.000446	60	14743	188	76974	42	18
GO:0016628	oxidoreductase activity, acting on the CH-CH group of donors, NAD or NADP as acceptor	molecular_function	0.017102	0.31372	64	14743	262	76974	42	22
GO:0006364	rRNA processing	biological_process	0.039855	0.52572	64	14743	273	76974	42	22
GO:0016072	rRNA metabolic process	biological_process	0.039855	0.52572	64	14743	273	76974	42	22
GO:0045454	cell redox homeostasis	biological_process	0.16786	1	78	14743	387	76974	42	36
GO:0070972	protein localization to endoplasmic reticulum	biological_process	0.3341	1	59	14743	299	76974	42	17
GO:0019031	viral envelope	cellular_component	0.43584	1	72	14743	367	76974	42	30
GO:0036338	viral membrane	cellular_component	0.43584	1	72	14743	367	76974	42	30
GO:0015711	organic anion transport	biological_process	0.63963	1	72	14743	398	76974	42	30
GO:0015988	energy coupled proton transmembrane transport, against electrochemical gradient	biological_process	0.81967	1	75	14743	433	76974	42	33
GO:0015991	ATP hydrolysis coupled proton transport	biological_process	0.81967	1	75	14743	433	76974	42	33
GO:0006352	DNA-templated transcription, initiation	biological_process	0.99329	1	69	14743	470	76974	42	27
GO:0042175	nuclear outer membrane-endoplasmic reticulum membrane network	cellular_component	0.99955	1	58	14743	462	76974	42	16
GO:0010605	negative regulation of macromolecule metabolic process	biological_process	0.000597	0.027768	83	14743	306	76974	41	42
GO:0006576	cellular biogenic amine metabolic process	biological_process	0.046977	0.58515	56	14743	237	76974	41	15
GO:0044106	cellular amine metabolic process	biological_process	0.046977	0.58515	56	14743	237	76974	41	15
GO:0016052	carbohydrate catabolic process	biological_process	0.2036	1	82	14743	392	76974	41	41
GO:0016836	hydro-lyase activity	molecular_function	0.20399	1	60	14743	282	76974	41	19
GO:0044270	cellular nitrogen compound catabolic process	biological_process	0.26938	1	72	14743	356	76974	41	31
GO:0001871	pattern binding	molecular_function	0.43712	1	62	14743	311	76974	41	21
GO:0030247	polysaccharide binding	molecular_function	0.43712	1	62	14743	311	76974	41	21
GO:0015103	inorganic anion transmembrane transporter activity	molecular_function	0.51455	1	56	14743	284	76974	41	15
GO:0000776	kinetochore	cellular_component	0.59704	1	61	14743	326	76974	41	20
GO:0015849	organic acid transport	biological_process	0.66896	1	71	14743	396	76974	41	30
GO:0046942	carboxylic acid transport	biological_process	0.66896	1	71	14743	396	76974	41	30
GO:0048856	anatomical structure development	biological_process	0.95718	1	65	14743	412	76974	41	24
GO:0046034	ATP metabolic process	biological_process	0.99449	1	93	14743	620	76974	41	52
GO:0009141	nucleoside triphosphate metabolic process	biological_process	0.99793	1	94	14743	646	76974	41	53
GO:0009144	purine nucleoside triphosphate metabolic process	biological_process	0.99793	1	94	14743	646	76974	41	53
GO:0009199	ribonucleoside triphosphate metabolic process	biological_process	0.99793	1	94	14743	646	76974	41	53
GO:0009205	purine ribonucleoside triphosphate metabolic process	biological_process	0.99793	1	94	14743	646	76974	41	53
GO:0005789	endoplasmic reticulum membrane	cellular_component	0.99956	1	57	14743	456	76974	41	16
GO:0048523	negative regulation of cellular process	biological_process	0.008991	0.21989	87	14743	358	76974	40	47
GO:0042440	pigment metabolic process	biological_process	0.0338	0.48099	74	14743	317	76974	40	34
GO:0071554	cell wall organization or biogenesis	biological_process	0.10558	1	60	14743	270	76974	40	20
GO:0006778	porphyrin-containing compound metabolic process	biological_process	0.16397	1	74	14743	347	76974	40	34
GO:0006612	protein targeting to membrane	biological_process	0.17597	1	57	14743	271	76974	40	17
GO:0046700	heterocycle catabolic process	biological_process	0.22638	1	71	14743	346	76974	40	31
GO:0009405	pathogenesis	biological_process	0.9911	1	63	14743	456	76974	40	23
GO:0044459	plasma membrane part	cellular_component	0.99682	1	59	14743	437	76974	40	19
GO:0033692	cellular polysaccharide biosynthetic process	biological_process	0.99961	1	62	14743	468	76974	40	22
GO:0000271	polysaccharide biosynthetic process	biological_process	0.99973	1	62	14743	473	76974	40	22
GO:0071103	DNA conformation change	biological_process	0.065609	0.74984	58	14743	250	76974	39	19
GO:0008757	S-adenosylmethionine-dependent methyltransferase activity	molecular_function	0.15202	1	73	14743	340	76974	39	34
GO:0045047	protein targeting to ER	biological_process	0.20335	1	56	14743	269	76974	39	17
GO:0072599	establishment of protein localization to endoplasmic reticulum	biological_process	0.20335	1	56	14743	269	76974	39	17
GO:0006613	cotranslational protein targeting to membrane	biological_process	0.21433	1	55	14743	265	76974	39	16
GO:0006614	SRP-dependent cotranslational protein targeting to membrane	biological_process	0.21433	1	55	14743	265	76974	39	16
GO:0004185	serine-type carboxypeptidase activity	molecular_function	0.34302	1	56	14743	277	76974	39	17
GO:0004180	carboxypeptidase activity	molecular_function	0.52219	1	57	14743	298	76974	39	18
GO:0033014	tetrapyrrole biosynthetic process	biological_process	0.90288	1	61	14743	366	76974	39	22
GO:0010608	posttranscriptional regulation of gene expression	biological_process	0.9747	1	61	14743	382	76974	39	22
GO:0016620	oxidoreductase activity, acting on the aldehyde or oxo group of donors, NAD or NADP as acceptor	molecular_function	1.09e-05	0.000945	58	14743	180	76974	38	20
GO:0006979	response to oxidative stress	biological_process	0.03086	0.45286	53	14743	235	76974	38	15
GO:0000793	condensed chromosome	cellular_component	0.06215	0.71885	59	14743	253	76974	38	21
GO:1901565	organonitrogen compound catabolic process	biological_process	0.11043	1	71	14743	329	76974	38	33
GO:0009523	photosystem II	cellular_component	0.20653	1	55	14743	290	76974	38	17
GO:0003779	actin binding	molecular_function	0.23266	1	76	14743	365	76974	38	38
GO:0005984	disaccharide metabolic process	biological_process	0.46842	1	60	14743	303	76974	38	22
GO:0006325	chromatin organization	biological_process	0.65394	1	63	14743	351	76974	38	25
GO:0031683	G-protein beta/gamma-subunit complex binding	molecular_function	0.71686	1	48	14743	271	76974	38	10
GO:0033177	proton-transporting two-sector ATPase complex, proton-transporting domain	cellular_component	0.72705	1	69	14743	393	76974	38	31
GO:0006417	regulation of translation	biological_process	0.98349	1	59	14743	378	76974	38	21
GO:0034248	regulation of cellular amide metabolic process	biological_process	0.98349	1	59	14743	378	76974	38	21
GO:0006261	DNA-dependent DNA replication	biological_process	0.99789	1	62	14743	476	76974	38	24
GO:0009312	oligosaccharide biosynthetic process	biological_process	0.030199	0.44879	58	14743	241	76974	37	21
GO:0015074	DNA integration	biological_process	0.14292	1	59	14743	261	76974	37	22
GO:0042995	cell projection	cellular_component	0.22374	1	65	14743	307	76974	37	28
GO:0006887	exocytosis	biological_process	0.3341	1	52	14743	247	76974	37	15
GO:0051258	protein polymerization	biological_process	0.50967	1	63	14743	325	76974	37	26
GO:0006575	cellular modified amino acid metabolic process	biological_process	0.51885	1	52	14743	270	76974	37	15
GO:0000228	nuclear chromosome	cellular_component	0.73649	1	53	14743	300	76974	37	16
GO:0007275	multicellular organismal development	biological_process	0.8068	1	56	14743	332	76974	37	19
GO:0033176	proton-transporting V-type ATPase complex	cellular_component	0.83695	1	67	14743	388	76974	37	30
GO:0004519	endonuclease activity	molecular_function	0.96467	1	58	14743	381	76974	37	21
GO:0016485	protein processing	biological_process	0.99964	1	59	14743	462	76974	37	22
GO:0051604	protein maturation	biological_process	0.99964	1	59	14743	462	76974	37	22
GO:0033865	nucleoside bisphosphate metabolic process	biological_process	0.016606	0.31098	45	14743	170	76974	36	9
GO:0033875	ribonucleoside bisphosphate metabolic process	biological_process	0.016606	0.31098	45	14743	170	76974	36	9
GO:0034032	purine nucleoside bisphosphate metabolic process	biological_process	0.016606	0.31098	45	14743	170	76974	36	9
GO:0003857	3-hydroxyacyl-CoA dehydrogenase activity	molecular_function	0.12154	1	57	14743	255	76974	36	21
GO:0003774	motor activity	molecular_function	0.26923	1	70	14743	331	76974	36	34
GO:0005543	phospholipid binding	molecular_function	0.32949	1	45	14743	216	76974	36	9
GO:0048583	regulation of response to stimulus	biological_process	0.57108	1	44	14743	234	76974	36	8
GO:0005794	Golgi apparatus	cellular_component	0.89516	1	54	14743	324	76974	36	18
GO:0006270	DNA replication initiation	biological_process	0.90608	1	57	14743	347	76974	36	21
GO:0009101	glycoprotein biosynthetic process	biological_process	0.95899	1	58	14743	364	76974	36	22
GO:0009100	glycoprotein metabolic process	biological_process	0.96117	1	58	14743	365	76974	36	22
GO:0004222	metalloendopeptidase activity	molecular_function	0.96219	1	52	14743	327	76974	36	16
GO:0006644	phospholipid metabolic process	biological_process	0.98666	1	59	14743	401	76974	36	23
GO:0009250	glucan biosynthetic process	biological_process	0.99971	1	58	14743	447	76974	36	22
GO:0035251	UDP-glucosyltransferase activity	molecular_function	1	1	62	14743	536	76974	36	26
GO:0043648	dicarboxylic acid metabolic process	biological_process	0.00097	0.041397	62	14743	226	76974	35	27
GO:0010033	response to organic substance	biological_process	0.008206	0.20719	69	14743	278	76974	35	34
GO:0008380	RNA splicing	biological_process	0.79109	1	45	14743	262	76974	35	10
GO:0004540	ribonuclease activity	molecular_function	0.89106	1	57	14743	344	76974	35	22
GO:0006486	protein glycosylation	biological_process	0.95509	1	54	14743	340	76974	35	19
GO:0043413	macromolecule glycosylation	biological_process	0.95509	1	54	14743	340	76974	35	19
GO:0051301	cell division	biological_process	0.97603	1	60	14743	391	76974	35	25
GO:0003712	transcription cofactor activity	molecular_function	0.99877	1	55	14743	423	76974	35	20
GO:0000989	transcription factor activity, transcription factor binding	molecular_function	0.99899	1	55	14743	426	76974	35	20
GO:0010629	negative regulation of gene expression	biological_process	0.000111	0.00752	67	14743	223	76974	34	33
GO:0000145	exocyst	cellular_component	0.042044	0.54692	45	14743	177	76974	34	11
GO:0042398	cellular modified amino acid biosynthetic process	biological_process	0.21559	1	48	14743	221	76974	34	14
GO:0005741	mitochondrial outer membrane	cellular_component	0.28582	1	49	14743	240	76974	34	15
GO:0031968	organelle outer membrane	cellular_component	0.28582	1	49	14743	240	76974	34	15
GO:0018193	peptidyl-amino acid modification	biological_process	0.42618	1	56	14743	295	76974	34	22
GO:0046486	glycerolipid metabolic process	biological_process	0.58571	1	53	14743	289	76974	34	19
GO:0000160	phosphorelay signal transduction system	biological_process	0.64213	1	60	14743	321	76974	34	26
GO:0031982	vesicle	cellular_component	0.91833	1	59	14743	352	76974	34	25
GO:0004888	transmembrane signaling receptor activity	molecular_function	0.93545	1	55	14743	364	76974	34	21
GO:0044455	mitochondrial membrane part	cellular_component	0.97292	1	48	14743	332	76974	34	14
GO:0003682	chromatin binding	molecular_function	0.16929	1	44	14743	197	76974	33	11
GO:0016810	hydrolase activity, acting on carbon-nitrogen (but not peptide) bonds	molecular_function	0.25731	1	54	14743	264	76974	33	21
GO:0016568	chromatin modification	biological_process	0.62932	1	54	14743	298	76974	33	21
GO:0004857	enzyme inhibitor activity	molecular_function	0.69099	1	51	14743	300	76974	33	18
GO:0031988	membrane-bounded vesicle	cellular_component	0.92109	1	58	14743	347	76974	33	25
GO:0031410	cytoplasmic vesicle	cellular_component	0.92486	1	58	14743	348	76974	33	25
GO:0060589	nucleoside-triphosphatase regulator activity	molecular_function	0.93689	1	52	14743	330	76974	33	19
GO:0070925	organelle assembly	biological_process	0.93816	1	54	14743	342	76974	33	21
GO:0004527	exonuclease activity	molecular_function	0.94627	1	52	14743	328	76974	33	19
GO:0098798	mitochondrial protein complex	cellular_component	0.97431	1	47	14743	327	76974	33	14
GO:0017038	protein import	biological_process	0.97883	1	51	14743	339	76974	33	18
GO:0004190	aspartic-type endopeptidase activity	molecular_function	0.99987	1	57	14743	469	76974	33	24
GO:0070001	aspartic-type peptidase activity	molecular_function	0.99987	1	57	14743	469	76974	33	24
GO:0019205	nucleobase-containing compound kinase activity	molecular_function	0.008538	0.21326	52	14743	198	76974	32	20
GO:0016645	oxidoreductase activity, acting on the CH-NH group of donors	molecular_function	0.015501	0.30315	48	14743	184	76974	32	16
GO:0009066	aspartate family amino acid metabolic process	biological_process	0.04578	0.57637	54	14743	226	76974	32	22
GO:0016838	carbon-oxygen lyase activity, acting on phosphates	molecular_function	0.36053	1	48	14743	232	76974	32	16
GO:0016023	cytoplasmic membrane-bounded vesicle	cellular_component	0.92752	1	57	14743	343	76974	32	25
GO:0048869	cellular developmental process	biological_process	0.94028	1	55	14743	345	76974	32	23
GO:0061695	transferase complex, transferring phosphorus-containing groups	cellular_component	0.99993	1	54	14743	441	76974	32	22
GO:0031324	negative regulation of cellular metabolic process	biological_process	0.00051	0.024929	67	14743	237	76974	31	36
GO:0019201	nucleotide kinase activity	molecular_function	0.001806	0.067289	46	14743	156	76974	31	15
GO:0042558	pteridine-containing compound metabolic process	biological_process	0.02925	0.43744	41	14743	162	76974	31	10
GO:0045229	external encapsulating structure organization	biological_process	0.045005	0.57275	45	14743	184	76974	31	14
GO:0006865	amino acid transport	biological_process	0.49094	1	49	14743	254	76974	31	18
GO:0006888	ER to Golgi vesicle-mediated transport	biological_process	0.69742	1	47	14743	255	76974	31	16
GO:0008565	protein transporter activity	molecular_function	0.86341	1	46	14743	287	76974	31	15
GO:0044454	nuclear chromosome part	cellular_component	0.87599	1	44	14743	269	76974	31	13
GO:0012506	vesicle membrane	cellular_component	0.9299	1	52	14743	314	76974	31	21
GO:0044433	cytoplasmic vesicle part	cellular_component	0.9335	1	52	14743	315	76974	31	21
GO:0009893	positive regulation of metabolic process	biological_process	0.9465	1	57	14743	356	76974	31	26
GO:0051274	beta-glucan biosynthetic process	biological_process	0.99996	1	51	14743	427	76974	31	20
GO:0051273	beta-glucan metabolic process	biological_process	0.99999	1	52	14743	448	76974	31	21
GO:0042559	pteridine-containing compound biosynthetic process	biological_process	0.007633	0.19586	40	14743	144	76974	30	10
GO:0006855	drug transmembrane transport	biological_process	0.01282	0.28	50	14743	189	76974	30	20
GO:0015238	drug transmembrane transporter activity	molecular_function	0.01282	0.28	50	14743	189	76974	30	20
GO:0015893	drug transport	biological_process	0.01282	0.28	50	14743	189	76974	30	20
GO:0090484	drug transporter activity	molecular_function	0.01282	0.28	50	14743	189	76974	30	20
GO:0046351	disaccharide biosynthetic process	biological_process	0.015495	0.30315	41	14743	155	76974	30	11
GO:0042493	response to drug	biological_process	0.015678	0.30315	50	14743	191	76974	30	20
GO:0008219	cell death	biological_process	0.038464	0.51608	44	14743	178	76974	30	14
GO:0016265	death	biological_process	0.038464	0.51608	44	14743	178	76974	30	14
GO:0071555	cell wall organization	biological_process	0.068426	0.77263	43	14743	180	76974	30	13
GO:0016597	amino acid binding	molecular_function	0.091317	0.92419	52	14743	224	76974	30	22
GO:0016638	oxidoreductase activity, acting on the CH-NH2 group of donors	molecular_function	0.099577	0.97419	56	14743	247	76974	30	26
GO:0005991	trehalose metabolic process	biological_process	0.10212	0.9888	44	14743	190	76974	30	14
GO:0031406	carboxylic acid binding	molecular_function	0.12132	1	52	14743	229	76974	30	22
GO:0043177	organic acid binding	molecular_function	0.12132	1	52	14743	229	76974	30	22
GO:0004616	phosphogluconate dehydrogenase (decarboxylating) activity	molecular_function	0.40768	1	42	14743	211	76974	30	12
GO:0019079	viral genome replication	biological_process	0.45476	1	45	14743	224	76974	30	15
GO:0019898	extrinsic component of membrane	cellular_component	0.63285	1	48	14743	270	76974	30	18
GO:0030133	transport vesicle	cellular_component	0.77462	1	49	14743	273	76974	30	19
GO:0006650	glycerophospholipid metabolic process	biological_process	0.84453	1	44	14743	268	76974	30	14
GO:0030120	vesicle coat	cellular_component	0.93489	1	50	14743	304	76974	30	20
GO:0030135	coated vesicle	cellular_component	0.93489	1	50	14743	304	76974	30	20
GO:0030662	coated vesicle membrane	cellular_component	0.93489	1	50	14743	304	76974	30	20
GO:0030659	cytoplasmic vesicle membrane	cellular_component	0.93617	1	51	14743	310	76974	30	21
GO:0044431	Golgi apparatus part	cellular_component	0.96151	1	46	14743	298	76974	30	16
GO:0005996	monosaccharide metabolic process	biological_process	0.99687	1	45	14743	330	76974	30	15
GO:0045182	translation regulator activity	molecular_function	0.99719	1	46	14743	324	76974	30	16
GO:0009067	aspartate family amino acid biosynthetic process	biological_process	0.013003	0.28268	49	14743	189	76974	29	20
GO:0016646	oxidoreductase activity, acting on the CH-NH group of donors, NAD or NADP as acceptor	molecular_function	0.019166	0.33212	39	14743	146	76974	29	10
GO:0006915	apoptotic process	biological_process	0.040848	0.53284	43	14743	174	76974	29	14
GO:0012501	programmed cell death	biological_process	0.040848	0.53284	43	14743	174	76974	29	14
GO:0048870	cell motility	biological_process	0.36054	1	57	14743	281	76974	29	28
GO:0051674	localization of cell	biological_process	0.36054	1	57	14743	281	76974	29	28
GO:0006733	oxidoreduction coenzyme metabolic process	biological_process	0.38825	1	66	14743	330	76974	29	37
GO:0048285	organelle fission	biological_process	0.70498	1	43	14743	245	76974	29	14
GO:0065004	protein-DNA complex assembly	biological_process	0.72403	1	43	14743	247	76974	29	14
GO:0071824	protein-DNA complex subunit organization	biological_process	0.72403	1	43	14743	247	76974	29	14
GO:0005743	mitochondrial inner membrane	cellular_component	0.83477	1	50	14743	308	76974	29	21
GO:0019866	organelle inner membrane	cellular_component	0.89876	1	50	14743	319	76974	29	21
GO:0007155	cell adhesion	biological_process	0.92081	1	49	14743	302	76974	29	20
GO:0022610	biological adhesion	biological_process	0.9582	1	49	14743	314	76974	29	20
GO:0009653	anatomical structure morphogenesis	biological_process	0.99461	1	41	14743	304	76974	29	12
GO:0010941	regulation of cell death	biological_process	0.04741	0.58589	38	14743	152	76974	28	10
GO:0042981	regulation of apoptotic process	biological_process	0.04741	0.58589	38	14743	152	76974	28	10
GO:0043067	regulation of programmed cell death	biological_process	0.04741	0.58589	38	14743	152	76974	28	10
GO:0005618	cell wall	cellular_component	0.10338	0.99685	44	14743	193	76974	28	16
GO:0008641	small protein activating enzyme activity	molecular_function	0.13969	1	35	14743	149	76974	28	7
GO:0016877	ligase activity, forming carbon-sulfur bonds	molecular_function	0.20061	1	35	14743	155	76974	28	7
GO:0003333	amino acid transmembrane transport	biological_process	0.37348	1	45	14743	222	76974	28	17
GO:1903825	organic acid transmembrane transport	biological_process	0.41407	1	45	14743	226	76974	28	17
GO:0098656	anion transmembrane transport	biological_process	0.42727	1	45	14743	227	76974	28	17
GO:0005615	extracellular space	cellular_component	0.69539	1	55	14743	303	76974	28	27
GO:0012507	ER to Golgi transport vesicle membrane	cellular_component	0.69876	1	44	14743	237	76974	28	16
GO:0030127	COPII vesicle coat	cellular_component	0.69876	1	44	14743	237	76974	28	16
GO:0030134	ER to Golgi transport vesicle	cellular_component	0.69876	1	44	14743	237	76974	28	16
GO:0046488	phosphatidylinositol metabolic process	biological_process	0.70923	1	41	14743	237	76974	28	13
GO:0030658	transport vesicle membrane	cellular_component	0.7667	1	46	14743	255	76974	28	18
GO:0042803	protein homodimerization activity	molecular_function	0.95779	1	50	14743	319	76974	28	22
GO:0031325	positive regulation of cellular metabolic process	biological_process	0.95996	1	53	14743	339	76974	28	25
GO:0016879	ligase activity, forming carbon-nitrogen bonds	molecular_function	0.97079	1	41	14743	269	76974	28	13
GO:0007059	chromosome segregation	biological_process	0.97637	1	48	14743	320	76974	28	20
GO:0009890	negative regulation of biosynthetic process	biological_process	1.07e-06	0.000114	58	14743	163	76974	27	31
GO:0006553	lysine metabolic process	biological_process	0.002316	0.076599	43	14743	150	76974	27	16
GO:0009072	aromatic amino acid family metabolic process	biological_process	0.021918	0.36498	42	14743	161	76974	27	15
GO:0015937	coenzyme A biosynthetic process	biological_process	0.060956	0.70679	31	14743	122	76974	27	4
GO:0033866	nucleoside bisphosphate biosynthetic process	biological_process	0.060956	0.70679	31	14743	122	76974	27	4
GO:0034030	ribonucleoside bisphosphate biosynthetic process	biological_process	0.060956	0.70679	31	14743	122	76974	27	4
GO:0034033	purine nucleoside bisphosphate biosynthetic process	biological_process	0.060956	0.70679	31	14743	122	76974	27	4
GO:0015936	coenzyme A metabolic process	biological_process	0.090912	0.92208	32	14743	131	76974	27	5
GO:0016866	intramolecular transferase activity	molecular_function	0.57683	1	38	14743	204	76974	27	11
GO:0072509	divalent inorganic cation transmembrane transporter activity	molecular_function	0.59633	1	43	14743	233	76974	27	16
GO:0006313	transposition, DNA-mediated	biological_process	0.64252	1	40	14743	213	76974	27	13
GO:0032196	transposition	biological_process	0.64252	1	40	14743	213	76974	27	13
GO:0003743	translation initiation factor activity	molecular_function	0.66403	1	38	14743	215	76974	27	11
GO:0005819	spindle	cellular_component	0.66641	1	44	14743	238	76974	27	17
GO:0015276	ligand-gated ion channel activity	molecular_function	0.68039	1	41	14743	229	76974	27	14
GO:0022834	ligand-gated channel activity	molecular_function	0.68039	1	41	14743	229	76974	27	14
GO:0065009	regulation of molecular function	biological_process	0.83593	1	37	14743	224	76974	27	10
GO:0030684	preribosome	cellular_component	0.84406	1	42	14743	248	76974	27	15
GO:0000902	cell morphogenesis	biological_process	0.88661	1	39	14743	239	76974	27	12
GO:0032989	cellular component morphogenesis	biological_process	0.88661	1	39	14743	239	76974	27	12
GO:0010558	negative regulation of macromolecule biosynthetic process	biological_process	3.61e-06	0.000339	56	14743	161	76974	26	30
GO:0031327	negative regulation of cellular biosynthetic process	biological_process	3.61e-06	0.000339	56	14743	161	76974	26	30
GO:0051172	negative regulation of nitrogen compound metabolic process	biological_process	3.61e-06	0.000339	56	14743	161	76974	26	30
GO:2000113	negative regulation of cellular macromolecule biosynthetic process	biological_process	3.61e-06	0.000339	56	14743	161	76974	26	30
GO:0005992	trehalose biosynthetic process	biological_process	0.038956	0.51824	36	14743	142	76974	26	10
GO:0051259	protein oligomerization	biological_process	0.074139	0.8128	39	14743	162	76974	26	13
GO:0016765	transferase activity, transferring alkyl or aryl (other than methyl) groups	molecular_function	0.082883	0.86879	50	14743	213	76974	26	24
GO:0006760	folic acid-containing compound metabolic process	biological_process	0.13155	1	35	14743	151	76974	26	9
GO:0072524	pyridine-containing compound metabolic process	biological_process	0.33472	1	63	14743	309	76974	26	37
GO:0023051	regulation of signaling	biological_process	0.53983	1	32	14743	167	76974	26	6
GO:0031226	intrinsic component of plasma membrane	cellular_component	0.6146	1	33	14743	183	76974	26	7
GO:0000280	nuclear division	biological_process	0.61805	1	39	14743	211	76974	26	13
GO:0034061	DNA polymerase activity	molecular_function	0.91642	1	48	14743	293	76974	26	22
GO:0016759	cellulose synthase activity	molecular_function	0.96916	1	42	14743	270	76974	26	16
GO:0016760	cellulose synthase (UDP-forming) activity	molecular_function	0.96916	1	42	14743	270	76974	26	16
GO:0030244	cellulose biosynthetic process	biological_process	0.9855	1	43	14743	288	76974	26	17
GO:0003690	double-stranded DNA binding	molecular_function	0.99034	1	42	14743	291	76974	26	16
GO:0030243	cellulose metabolic process	biological_process	0.99477	1	44	14743	309	76974	26	18
GO:0006357	regulation of transcription from RNA polymerase II promoter	biological_process	0.99894	1	39	14743	321	76974	26	13
GO:0051701	interaction with host	biological_process	0.99936	1	39	14743	340	76974	26	13
GO:0045934	negative regulation of nucleobase-containing compound metabolic process	biological_process	9.27e-06	0.000837	50	14743	143	76974	25	25
GO:0003777	microtubule motor activity	molecular_function	0.001309	0.051044	52	14743	176	76974	25	27
GO:0007018	microtubule-based movement	biological_process	0.001434	0.054922	52	14743	177	76974	25	27
GO:0008374	O-acyltransferase activity	molecular_function	0.002009	0.07201	41	14743	139	76974	25	16
GO:0004488	methylenetetrahydrofolate dehydrogenase (NADP+) activity	molecular_function	0.016983	0.31275	32	14743	115	76974	25	7
GO:0009719	response to endogenous stimulus	biological_process	0.038082	0.51467	52	14743	219	76974	25	27
GO:0009396	folic acid-containing compound biosynthetic process	biological_process	0.05374	0.6389	34	14743	134	76974	25	9
GO:0019842	vitamin binding	molecular_function	0.074775	0.81283	40	14743	164	76974	25	15
GO:0004497	monooxygenase activity	molecular_function	0.24709	1	48	14743	225	76974	25	23
GO:0010333	terpene synthase activity	molecular_function	0.54404	1	41	14743	210	76974	25	16
GO:0010646	regulation of cell communication	biological_process	0.58709	1	31	14743	165	76974	25	6
GO:0030674	protein binding, bridging	molecular_function	0.6236	1	40	14743	215	76974	25	15
GO:0060090	binding, bridging	molecular_function	0.6236	1	40	14743	215	76974	25	15
GO:0004803	transposase activity	molecular_function	0.64611	1	38	14743	202	76974	25	13
GO:0034508	centromere complex assembly	biological_process	0.71665	1	35	14743	200	76974	25	10
GO:0000375	RNA splicing, via transesterification reactions	biological_process	0.74354	1	34	14743	197	76974	25	9
GO:0036459	ubiquitinyl hydrolase activity	molecular_function	0.95791	1	39	14743	249	76974	25	14
GO:0016591	DNA-directed RNA polymerase II, holoenzyme	cellular_component	0.97882	1	41	14743	282	76974	25	16
GO:0019318	hexose metabolic process	biological_process	0.99814	1	39	14743	299	76974	25	14
GO:0000428	DNA-directed RNA polymerase complex	cellular_component	0.99939	1	42	14743	341	76974	25	17
GO:0030880	RNA polymerase complex	cellular_component	0.99939	1	42	14743	341	76974	25	17
GO:0055029	nuclear DNA-directed RNA polymerase complex	cellular_component	0.99939	1	42	14743	341	76974	25	17
GO:0009085	lysine biosynthetic process	biological_process	0.000538	0.025536	39	14743	125	76974	24	15
GO:0009089	lysine biosynthetic process via diaminopimelate	biological_process	0.000538	0.025536	39	14743	125	76974	24	15
GO:0046451	diaminopimelate metabolic process	biological_process	0.000538	0.025536	39	14743	125	76974	24	15
GO:0004127	cytidylate kinase activity	molecular_function	0.023704	0.3838	33	14743	120	76974	24	9
GO:0009725	response to hormone	biological_process	0.028787	0.43328	51	14743	211	76974	24	27
GO:0003916	DNA topoisomerase activity	molecular_function	0.066961	0.76322	30	14743	118	76974	24	6
GO:0019362	pyridine nucleotide metabolic process	biological_process	0.3079	1	60	14743	291	76974	24	36
GO:0046496	nicotinamide nucleotide metabolic process	biological_process	0.3079	1	60	14743	291	76974	24	36
GO:0005244	voltage-gated ion channel activity	molecular_function	0.39584	1	33	14743	161	76974	24	9
GO:0022832	voltage-gated channel activity	molecular_function	0.39584	1	33	14743	161	76974	24	9
GO:0033179	proton-transporting V-type ATPase, V0 domain	cellular_component	0.43536	1	43	14743	216	76974	24	19
GO:0015079	potassium ion transmembrane transporter activity	molecular_function	0.62761	1	38	14743	204	76974	24	14
GO:0005815	microtubule organizing center	cellular_component	0.6289	1	39	14743	207	76974	24	15
GO:0009966	regulation of signal transduction	biological_process	0.63394	1	30	14743	163	76974	24	6
GO:1990204	oxidoreductase complex	cellular_component	0.65502	1	36	14743	221	76974	24	12
GO:0009110	vitamin biosynthetic process	biological_process	0.85806	1	35	14743	214	76974	24	11
GO:0042364	water-soluble vitamin biosynthetic process	biological_process	0.85806	1	35	14743	214	76974	24	11
GO:0006766	vitamin metabolic process	biological_process	0.87856	1	35	14743	217	76974	24	11
GO:0006767	water-soluble vitamin metabolic process	biological_process	0.87856	1	35	14743	217	76974	24	11
GO:0016410	N-acyltransferase activity	molecular_function	0.90101	1	35	14743	224	76974	24	11
GO:0051128	regulation of cellular component organization	biological_process	0.91412	1	41	14743	261	76974	24	17
GO:0042157	lipoprotein metabolic process	biological_process	0.96536	1	40	14743	275	76974	24	16
GO:0045892	negative regulation of transcription, DNA-templated	biological_process	0.000112	0.00752	45	14743	136	76974	23	22
GO:0051253	negative regulation of RNA metabolic process	biological_process	0.000112	0.00752	45	14743	136	76974	23	22
GO:1902679	negative regulation of RNA biosynthetic process	biological_process	0.000112	0.00752	45	14743	136	76974	23	22
GO:1903507	negative regulation of nucleic acid-templated transcription	biological_process	0.000112	0.00752	45	14743	136	76974	23	22
GO:0030258	lipid modification	biological_process	0.004023	0.11589	40	14743	138	76974	23	17
GO:1901136	carbohydrate derivative catabolic process	biological_process	0.022904	0.37484	41	14743	160	76974	23	18
GO:0044724	single-organism carbohydrate catabolic process	biological_process	0.11035	1	54	14743	239	76974	23	31
GO:0051382	kinetochore assembly	biological_process	0.70423	1	33	14743	186	76974	23	10
GO:0051383	kinetochore organization	biological_process	0.70423	1	33	14743	186	76974	23	10
GO:0008408	3'-5' exonuclease activity	molecular_function	0.81567	1	32	14743	189	76974	23	9
GO:0007005	mitochondrion organization	biological_process	0.95045	1	36	14743	239	76974	23	13
GO:0019954	asexual reproduction	biological_process	0.9652	1	37	14743	258	76974	23	14
GO:0043207	response to external biotic stimulus	biological_process	0.99972	1	35	14743	327	76974	23	12
GO:0051707	response to other organism	biological_process	0.99972	1	35	14743	327	76974	23	12
GO:0016763	transferase activity, transferring pentosyl groups	molecular_function	0.008193	0.20719	39	14743	139	76974	22	17
GO:0052646	alditol phosphate metabolic process	biological_process	0.010486	0.24258	37	14743	132	76974	22	15
GO:0009628	response to abiotic stimulus	biological_process	0.013709	0.28485	27	14743	93	76974	22	5
GO:0006479	protein methylation	biological_process	0.11637	1	38	14743	163	76974	22	16
GO:0008213	protein alkylation	biological_process	0.11637	1	38	14743	163	76974	22	16
GO:0071804	cellular potassium ion transport	biological_process	0.11764	1	36	14743	152	76974	22	14
GO:0071805	potassium ion transmembrane transport	biological_process	0.11764	1	36	14743	152	76974	22	14
GO:0006547	histidine metabolic process	biological_process	0.1394	1	38	14743	168	76974	22	16
GO:0052803	imidazole-containing compound metabolic process	biological_process	0.1394	1	38	14743	168	76974	22	16
GO:0000105	histidine biosynthetic process	biological_process	0.17198	1	36	14743	162	76974	22	14
GO:0008173	RNA methyltransferase activity	molecular_function	0.23634	1	42	14743	197	76974	22	20
GO:0000794	condensed nuclear chromosome	cellular_component	0.33067	1	33	14743	159	76974	22	11
GO:0005887	integral component of plasma membrane	cellular_component	0.83194	1	28	14743	174	76974	22	6
GO:0016579	protein deubiquitination	biological_process	0.89369	1	36	14743	215	76974	22	14
GO:0070646	protein modification by small protein removal	biological_process	0.89369	1	36	14743	215	76974	22	14
GO:0043093	FtsZ-dependent cytokinesis	biological_process	0.91841	1	32	14743	206	76974	22	10
GO:0032505	reproduction of a single-celled organism	biological_process	0.92339	1	32	14743	207	76974	22	10
GO:0000226	microtubule cytoskeleton organization	biological_process	0.92833	1	46	14743	285	76974	22	24
GO:0031329	regulation of cellular catabolic process	biological_process	0.93263	1	51	14743	315	76974	22	29
GO:0000910	cytokinesis	biological_process	0.93924	1	34	14743	222	76974	22	12
GO:0032506	cytokinetic process	biological_process	0.94156	1	33	14743	217	76974	22	11
GO:0090529	cell septum assembly	biological_process	0.94156	1	33	14743	217	76974	22	11
GO:0006913	nucleocytoplasmic transport	biological_process	0.95715	1	42	14743	273	76974	22	20
GO:0009894	regulation of catabolic process	biological_process	0.96272	1	51	14743	326	76974	22	29
GO:0051169	nuclear transport	biological_process	0.96655	1	42	14743	277	76974	22	20
GO:0005261	cation channel activity	molecular_function	0.99121	1	30	14743	234	76974	22	8
GO:0031300	intrinsic component of organelle membrane	cellular_component	0.99738	1	29	14743	245	76974	22	7
GO:0031301	integral component of organelle membrane	cellular_component	0.99738	1	29	14743	245	76974	22	7
GO:0051321	meiotic cell cycle	biological_process	0.014916	0.29807	27	14743	93	76974	21	6
GO:0030976	thiamine pyrophosphate binding	molecular_function	0.017759	0.32076	36	14743	130	76974	21	15
GO:0031072	heat shock protein binding	molecular_function	0.027663	0.42177	27	14743	100	76974	21	6
GO:0046434	organophosphate catabolic process	biological_process	0.034667	0.48741	34	14743	130	76974	21	13
GO:0006720	isoprenoid metabolic process	biological_process	0.048664	0.59667	40	14743	161	76974	21	19
GO:0008677	2-dehydropantoate 2-reductase activity	molecular_function	0.086925	0.89517	32	14743	130	76974	21	11
GO:0016868	intramolecular transferase activity, phosphotransferases	molecular_function	0.17855	1	26	14743	114	76974	21	5
GO:1901681	sulfur compound binding	molecular_function	0.27688	1	39	14743	183	76974	21	18
GO:0005516	calmodulin binding	molecular_function	0.3906	1	29	14743	138	76974	21	8
GO:0008643	carbohydrate transport	biological_process	0.52617	1	32	14743	177	76974	21	11
GO:0072511	divalent inorganic cation transport	biological_process	0.65456	1	32	14743	176	76974	21	11
GO:0046148	pigment biosynthetic process	biological_process	0.67041	1	34	14743	186	76974	21	13
GO:0016893	endonuclease activity, active with either ribo- or deoxyribonucleic acids and producing 5'-phosphomonoesters	molecular_function	0.79591	1	35	14743	206	76974	21	14
GO:0032040	small-subunit processome	cellular_component	0.84424	1	36	14743	214	76974	21	15
GO:0090575	RNA polymerase II transcription factor complex	cellular_component	0.89621	1	36	14743	225	76974	21	15
GO:0030695	GTPase regulator activity	molecular_function	0.90055	1	32	14743	198	76974	21	11
GO:0044798	nuclear transcription factor complex	cellular_component	0.9375	1	36	14743	238	76974	21	15
GO:0016407	acetyltransferase activity	molecular_function	0.938	1	32	14743	218	76974	21	11
GO:0005667	transcription factor complex	cellular_component	0.96677	1	36	14743	248	76974	21	15
GO:0070840	dynein complex binding	molecular_function	0.98983	1	36	14743	257	76974	21	15
GO:0005057	receptor signaling protein activity	molecular_function	0.99116	1	34	14743	243	76974	21	13
GO:0019899	enzyme binding	molecular_function	0.99123	1	38	14743	268	76974	21	17
GO:0009156	ribonucleoside monophosphate biosynthetic process	biological_process	0.99673	1	41	14743	317	76974	21	20
GO:0009127	purine nucleoside monophosphate biosynthetic process	biological_process	0.99675	1	40	14743	310	76974	21	19
GO:0009168	purine ribonucleoside monophosphate biosynthetic process	biological_process	0.99675	1	40	14743	310	76974	21	19
GO:0009124	nucleoside monophosphate biosynthetic process	biological_process	0.99698	1	41	14743	318	76974	21	20
GO:0001076	transcription factor activity, RNA polymerase II transcription factor binding	molecular_function	0.9978	1	32	14743	269	76974	21	11
GO:0001104	RNA polymerase II transcription cofactor activity	molecular_function	0.9978	1	32	14743	269	76974	21	11
GO:0016592	mediator complex	cellular_component	0.99815	1	32	14743	271	76974	21	11
GO:0015994	chlorophyll metabolic process	biological_process	0.000444	0.022645	41	14743	132	76974	20	21
GO:0006072	glycerol-3-phosphate metabolic process	biological_process	0.001051	0.043277	33	14743	101	76974	20	13
GO:0046168	glycerol-3-phosphate catabolic process	biological_process	0.001051	0.043277	33	14743	101	76974	20	13
GO:0051539	4 iron, 4 sulfur cluster binding	molecular_function	0.001315	0.051044	25	14743	71	76974	20	5
GO:0003697	single-stranded DNA binding	molecular_function	0.003119	0.096997	25	14743	75	76974	20	5
GO:0006265	DNA topological change	biological_process	0.037149	0.50713	26	14743	95	76974	20	6
GO:0070566	adenylyltransferase activity	molecular_function	0.038863	0.51824	28	14743	103	76974	20	8
GO:0043631	RNA polyadenylation	biological_process	0.040279	0.52835	24	14743	86	76974	20	4
GO:0016151	nickel cation binding	molecular_function	0.26787	1	30	14743	140	76974	20	10
GO:0001510	RNA methylation	biological_process	0.28975	1	27	14743	126	76974	20	7
GO:0044282	small molecule catabolic process	biological_process	0.6571	1	30	14743	163	76974	20	10
GO:0016667	oxidoreductase activity, acting on a sulfur group of donors	molecular_function	0.74431	1	33	14743	204	76974	20	13
GO:0016569	covalent chromatin modification	biological_process	0.79202	1	32	14743	189	76974	20	12
GO:0016570	histone modification	biological_process	0.79202	1	32	14743	189	76974	20	12
GO:0010506	regulation of autophagy	biological_process	0.80395	1	45	14743	258	76974	20	25
GO:0001775	cell activation	biological_process	0.80905	1	38	14743	222	76974	20	18
GO:0004521	endoribonuclease activity	molecular_function	0.86118	1	33	14743	203	76974	20	13
GO:0034655	nucleobase-containing compound catabolic process	biological_process	0.89842	1	30	14743	190	76974	20	10
GO:0006779	porphyrin-containing compound biosynthetic process	biological_process	0.90386	1	33	14743	206	76974	20	13
GO:0098800	inner mitochondrial membrane protein complex	cellular_component	0.93187	1	33	14743	228	76974	20	13
GO:0015629	actin cytoskeleton	cellular_component	0.93618	1	37	14743	235	76974	20	17
GO:0061630	ubiquitin protein ligase activity	molecular_function	0.94029	1	27	14743	177	76974	20	7
GO:0061659	ubiquitin-like protein ligase activity	molecular_function	0.94029	1	27	14743	177	76974	20	7
GO:0050790	regulation of catalytic activity	biological_process	0.94801	1	28	14743	193	76974	20	8
GO:0006367	transcription initiation from RNA polymerase II promoter	biological_process	0.95857	1	35	14743	232	76974	20	15
GO:0003887	DNA-directed DNA polymerase activity	molecular_function	0.979	1	38	14743	259	76974	20	18
GO:0004673	protein histidine kinase activity	molecular_function	0.9981	1	33	14743	257	76974	20	13
GO:0016775	phosphotransferase activity, nitrogenous group as acceptor	molecular_function	0.9981	1	33	14743	257	76974	20	13
GO:0008654	phospholipid biosynthetic process	biological_process	0.99926	1	36	14743	300	76974	20	16
GO:0015996	chlorophyll catabolic process	biological_process	0.000189	0.011404	40	14743	123	76974	19	21
GO:0047746	chlorophyllase activity	molecular_function	0.000189	0.011404	40	14743	123	76974	19	21
GO:0046149	pigment catabolic process	biological_process	0.000266	0.015602	40	14743	125	76974	19	21
GO:0006787	porphyrin-containing compound catabolic process	biological_process	0.000778	0.03511	40	14743	131	76974	19	21
GO:0033015	tetrapyrrole catabolic process	biological_process	0.000778	0.03511	40	14743	131	76974	19	21
GO:0051187	cofactor catabolic process	biological_process	0.000922	0.039709	40	14743	132	76974	19	21
GO:0016160	amylase activity	molecular_function	0.023868	0.38385	29	14743	103	76974	19	10
GO:0009073	aromatic amino acid family biosynthetic process	biological_process	0.025013	0.38772	30	14743	109	76974	19	11
GO:0015948	methanogenesis	biological_process	0.03064	0.45105	34	14743	129	76974	19	15
GO:0015975	energy derivation by oxidation of reduced inorganic compounds	biological_process	0.03064	0.45105	34	14743	129	76974	19	15
GO:0043447	alkane biosynthetic process	biological_process	0.03064	0.45105	34	14743	129	76974	19	15
GO:0009061	anaerobic respiration	biological_process	0.033199	0.47979	34	14743	130	76974	19	15
GO:0015947	methane metabolic process	biological_process	0.034134	0.48136	34	14743	130	76974	19	15
GO:0043446	cellular alkane metabolic process	biological_process	0.034134	0.48136	34	14743	130	76974	19	15
GO:0006821	chloride transport	biological_process	0.094218	0.94457	27	14743	107	76974	19	8
GO:0008081	phosphoric diester hydrolase activity	molecular_function	0.20156	1	33	14743	146	76974	19	14
GO:0016709	oxidoreductase activity, acting on paired donors, with incorporation or reduction of molecular oxygen, NAD(P)H as one donor, and incorporation of one atom of oxygen	molecular_function	0.2264	1	29	14743	129	76974	19	10
GO:0006323	DNA packaging	biological_process	0.33979	1	32	14743	155	76974	19	13
GO:0016651	oxidoreductase activity, acting on NAD(P)H	molecular_function	0.35236	1	29	14743	147	76974	19	10
GO:0006413	translational initiation	biological_process	0.59854	1	26	14743	144	76974	19	7
GO:0006783	heme biosynthetic process	biological_process	0.66227	1	31	14743	169	76974	19	12
GO:0050661	NADP binding	molecular_function	0.75299	1	28	14743	159	76974	19	9
GO:0002376	immune system process	biological_process	0.75468	1	39	14743	223	76974	19	20
GO:0042168	heme metabolic process	biological_process	0.75726	1	31	14743	177	76974	19	12
GO:0005577	fibrinogen complex	cellular_component	0.75884	1	34	14743	194	76974	19	15
GO:0030168	platelet activation	biological_process	0.75884	1	34	14743	194	76974	19	15
GO:0000377	RNA splicing, via transesterification reactions with bulged adenosine as nucleophile	biological_process	0.80669	1	26	14743	160	76974	19	7
GO:0000398	mRNA splicing, via spliceosome	biological_process	0.80669	1	26	14743	160	76974	19	7
GO:0007596	blood coagulation	biological_process	0.82685	1	34	14743	201	76974	19	15
GO:0007599	hemostasis	biological_process	0.82685	1	34	14743	201	76974	19	15
GO:0050817	coagulation	biological_process	0.82685	1	34	14743	201	76974	19	15
GO:0050878	regulation of body fluid levels	biological_process	0.82685	1	34	14743	201	76974	19	15
GO:0042060	wound healing	biological_process	0.84066	1	36	14743	214	76974	19	17
GO:0045017	glycerolipid biosynthetic process	biological_process	0.84341	1	31	14743	196	76974	19	12
GO:0009611	response to wounding	biological_process	0.86276	1	36	14743	218	76974	19	17
GO:0008170	N-methyltransferase activity	molecular_function	0.89939	1	34	14743	229	76974	19	15
GO:0004536	deoxyribonuclease activity	molecular_function	0.9045	1	31	14743	199	76974	19	12
GO:0016796	exonuclease activity, active with either ribo- or deoxyribonucleic acids and producing 5'-phosphomonoesters	molecular_function	0.90531	1	34	14743	217	76974	19	15
GO:0006606	protein import into nucleus	biological_process	0.91062	1	35	14743	219	76974	19	16
GO:0034504	protein localization to nucleus	biological_process	0.91062	1	35	14743	219	76974	19	16
GO:0044744	protein targeting to nucleus	biological_process	0.91062	1	35	14743	219	76974	19	16
GO:0051170	nuclear import	biological_process	0.91062	1	35	14743	219	76974	19	16
GO:1902593	single-organism nuclear import	biological_process	0.91062	1	35	14743	219	76974	19	16
GO:0008080	N-acetyltransferase activity	molecular_function	0.93975	1	29	14743	198	76974	19	10
GO:0008514	organic anion transmembrane transporter activity	molecular_function	0.94857	1	34	14743	230	76974	19	15
GO:0005342	organic acid transmembrane transporter activity	molecular_function	0.9508	1	30	14743	208	76974	19	11
GO:0046943	carboxylic acid transmembrane transporter activity	molecular_function	0.9508	1	30	14743	208	76974	19	11
GO:0098813	nuclear chromosome segregation	biological_process	0.97615	1	31	14743	218	76974	19	12
GO:0008839	4-hydroxy-tetrahydrodipicolinate reductase	molecular_function	0.000356	0.019763	31	14743	92	76974	18	13
GO:0004764	shikimate 3-dehydrogenase (NADP+) activity	molecular_function	0.004348	0.12169	22	14743	64	76974	18	4
GO:0000502	proteasome complex	cellular_component	0.069944	0.78451	37	14743	162	76974	18	19
GO:0005247	voltage-gated chloride channel activity	molecular_function	0.070833	0.78451	26	14743	99	76974	18	8
GO:0005253	anion channel activity	molecular_function	0.070833	0.78451	26	14743	99	76974	18	8
GO:0005254	chloride channel activity	molecular_function	0.070833	0.78451	26	14743	99	76974	18	8
GO:0008308	voltage-gated anion channel activity	molecular_function	0.070833	0.78451	26	14743	99	76974	18	8
GO:0015108	chloride transmembrane transporter activity	molecular_function	0.070833	0.78451	26	14743	99	76974	18	8
GO:0008276	protein methyltransferase activity	molecular_function	0.25994	1	29	14743	134	76974	18	11
GO:0009654	photosystem II oxygen evolving complex	cellular_component	0.37734	1	28	14743	154	76974	18	10
GO:0006402	mRNA catabolic process	biological_process	0.4175	1	28	14743	139	76974	18	10
GO:0006401	RNA catabolic process	biological_process	0.45136	1	28	14743	141	76974	18	10
GO:0031514	motile cilium	cellular_component	0.49051	1	38	14743	192	76974	18	20
GO:0005929	cilium	cellular_component	0.52417	1	38	14743	195	76974	18	20
GO:0015925	galactosidase activity	molecular_function	0.53619	1	25	14743	128	76974	18	7
GO:0019354	siroheme biosynthetic process	biological_process	0.55114	1	27	14743	141	76974	18	9
GO:0043115	precorrin-2 dehydrogenase activity	molecular_function	0.55114	1	27	14743	141	76974	18	9
GO:0046156	siroheme metabolic process	biological_process	0.55114	1	27	14743	141	76974	18	9
GO:0000049	tRNA binding	molecular_function	0.66603	1	26	14743	144	76974	18	8
GO:0000777	condensed chromosome kinetochore	cellular_component	0.71965	1	28	14743	159	76974	18	10
GO:0000779	condensed chromosome, centromeric region	cellular_component	0.71965	1	28	14743	159	76974	18	10
GO:0042651	thylakoid membrane	cellular_component	0.76598	1	28	14743	182	76974	18	10
GO:0022900	electron transport chain	biological_process	0.78786	1	30	14743	183	76974	18	12
GO:0006006	glucose metabolic process	biological_process	0.90958	1	26	14743	165	76974	18	8
GO:0033178	proton-transporting two-sector ATPase complex, catalytic domain	cellular_component	0.93185	1	33	14743	218	76974	18	15
GO:1903509	liposaccharide metabolic process	biological_process	0.97641	1	27	14743	203	76974	18	9
GO:0004930	G-protein coupled receptor activity	molecular_function	0.98635	1	23	14743	201	76974	18	5
GO:0030259	lipid glycosylation	biological_process	9.97e-05	0.007203	30	14743	79	76974	17	13
GO:0003855	3-dehydroquinate dehydratase activity	molecular_function	0.013778	0.28504	21	14743	66	76974	17	4
GO:0004140	dephospho-CoA kinase activity	molecular_function	0.018564	0.32408	21	14743	70	76974	17	4
GO:0008299	isoprenoid biosynthetic process	biological_process	0.088637	0.90684	36	14743	149	76974	17	19
GO:0019684	photosynthesis, light reaction	biological_process	0.16641	1	29	14743	126	76974	17	12
GO:0019080	viral gene expression	biological_process	0.17269	1	27	14743	115	76974	17	10
GO:0006096	glycolytic process	biological_process	0.23816	1	46	14743	215	76974	17	29
GO:0006757	ATP generation from ADP	biological_process	0.23816	1	46	14743	215	76974	17	29
GO:0009135	purine nucleoside diphosphate metabolic process	biological_process	0.23816	1	46	14743	215	76974	17	29
GO:0009179	purine ribonucleoside diphosphate metabolic process	biological_process	0.23816	1	46	14743	215	76974	17	29
GO:0009185	ribonucleoside diphosphate metabolic process	biological_process	0.23816	1	46	14743	215	76974	17	29
GO:0046031	ADP metabolic process	biological_process	0.23816	1	46	14743	215	76974	17	29
GO:0007166	cell surface receptor signaling pathway	biological_process	0.26912	1	23	14743	111	76974	17	6
GO:0006090	pyruvate metabolic process	biological_process	0.2699	1	46	14743	218	76974	17	29
GO:0044033	multi-organism metabolic process	biological_process	0.28262	1	27	14743	123	76974	17	10
GO:0015298	solute:cation antiporter activity	molecular_function	0.42211	1	37	14743	180	76974	17	20
GO:0015299	solute:proton antiporter activity	molecular_function	0.42211	1	37	14743	180	76974	17	20
GO:0015144	carbohydrate transmembrane transporter activity	molecular_function	0.42703	1	26	14743	138	76974	17	9
GO:1901476	carbohydrate transporter activity	molecular_function	0.42703	1	26	14743	138	76974	17	9
GO:0016790	thiolester hydrolase activity	molecular_function	0.43009	1	27	14743	135	76974	17	10
GO:0006165	nucleoside diphosphate phosphorylation	biological_process	0.45574	1	47	14743	241	76974	17	30
GO:0009132	nucleoside diphosphate metabolic process	biological_process	0.45574	1	47	14743	241	76974	17	30
GO:0046939	nucleotide phosphorylation	biological_process	0.45574	1	47	14743	241	76974	17	30
GO:0032324	molybdopterin cofactor biosynthetic process	biological_process	0.51011	1	22	14743	111	76974	17	5
GO:0043545	molybdopterin cofactor metabolic process	biological_process	0.51011	1	22	14743	111	76974	17	5
GO:0051189	prosthetic group metabolic process	biological_process	0.51011	1	22	14743	111	76974	17	5
GO:0009064	glutamine family amino acid metabolic process	biological_process	0.51856	1	39	14743	202	76974	17	22
GO:0016054	organic acid catabolic process	biological_process	0.63187	1	27	14743	145	76974	17	10
GO:0046395	carboxylic acid catabolic process	biological_process	0.63187	1	27	14743	145	76974	17	10
GO:0000940	condensed chromosome outer kinetochore	cellular_component	0.75552	1	26	14743	151	76974	17	9
GO:0004197	cysteine-type endopeptidase activity	molecular_function	0.88459	1	26	14743	168	76974	17	9
GO:0016311	dephosphorylation	biological_process	0.91314	1	27	14743	174	76974	17	10
GO:0015171	amino acid transmembrane transporter activity	molecular_function	0.96669	1	24	14743	172	76974	17	7
GO:0008047	enzyme activator activity	molecular_function	0.96947	1	24	14743	168	76974	17	7
GO:0000155	phosphorelay sensor kinase activity	molecular_function	0.99591	1	29	14743	221	76974	17	12
GO:0004315	3-oxoacyl-[acyl-carrier-protein] synthase activity	molecular_function	0.003009	0.094215	28	14743	86	76974	16	12
GO:0004312	fatty acid synthase activity	molecular_function	0.003635	0.10736	28	14743	87	76974	16	12
GO:0007127	meiosis I	biological_process	0.006644	0.17528	21	14743	64	76974	16	5
GO:0004652	polynucleotide adenylyltransferase activity	molecular_function	0.008455	0.21233	20	14743	59	76974	16	4
GO:0007126	meiotic nuclear division	biological_process	0.01681	0.31098	21	14743	69	76974	16	5
GO:1903046	meiotic cell cycle process	biological_process	0.01681	0.31098	21	14743	69	76974	16	5
GO:0016042	lipid catabolic process	biological_process	0.2513	1	23	14743	102	76974	16	7
GO:0016854	racemase and epimerase activity	molecular_function	0.34313	1	20	14743	94	76974	16	4
GO:0035091	phosphatidylinositol binding	molecular_function	0.37041	1	20	14743	93	76974	16	4
GO:0018205	peptidyl-lysine modification	biological_process	0.39289	1	24	14743	114	76974	16	8
GO:0061025	membrane fusion	biological_process	0.44537	1	28	14743	141	76974	16	12
GO:0000272	polysaccharide catabolic process	biological_process	0.53576	1	26	14743	137	76974	16	10
GO:0005777	peroxisome	cellular_component	0.60156	1	20	14743	114	76974	16	4
GO:0042579	microbody	cellular_component	0.60156	1	20	14743	114	76974	16	4
GO:0008378	galactosyltransferase activity	molecular_function	0.64427	1	16	14743	87	76974	16	0
GO:0098542	defense response to other organism	biological_process	0.7336	1	23	14743	138	76974	16	7
GO:0070838	divalent metal ion transport	biological_process	0.76654	1	27	14743	157	76974	16	11
GO:0008375	acetylglucosaminyltransferase activity	molecular_function	0.79377	1	26	14743	151	76974	16	10
GO:0006470	protein dephosphorylation	biological_process	0.87996	1	26	14743	163	76974	16	10
GO:0006643	membrane lipid metabolic process	biological_process	0.97672	1	27	14743	204	76974	16	11
GO:0010876	lipid localization	biological_process	0.98555	1	28	14743	210	76974	16	12
GO:0016762	xyloglucan:xyloglucosyl transferase activity	molecular_function	0.006783	0.17597	18	14743	56	76974	15	3
GO:0048046	apoplast	cellular_component	0.006783	0.17597	18	14743	56	76974	15	3
GO:0005544	calcium-dependent phospholipid binding	molecular_function	0.008007	0.20436	18	14743	54	76974	15	3
GO:0010035	response to inorganic substance	biological_process	0.016439	0.31098	17	14743	56	76974	15	2
GO:0009664	plant-type cell wall organization	biological_process	0.023251	0.3778	17	14743	57	76974	15	2
GO:0071669	plant-type cell wall organization or biogenesis	biological_process	0.023251	0.3778	17	14743	57	76974	15	2
GO:0016624	oxidoreductase activity, acting on the aldehyde or oxo group of donors, disulfide as acceptor	molecular_function	0.04376	0.563	21	14743	74	76974	15	6
GO:0005839	proteasome core complex	cellular_component	0.069147	0.77869	30	14743	129	76974	15	15
GO:0043900	regulation of multi-organism process	biological_process	0.17664	1	22	14743	95	76974	15	7
GO:0006414	translational elongation	biological_process	0.21321	1	20	14743	91	76974	15	5
GO:0009060	aerobic respiration	biological_process	0.26947	1	21	14743	93	76974	15	6
GO:0000413	protein peptidyl-prolyl isomerization	biological_process	0.27554	1	26	14743	130	76974	15	11
GO:0003755	peptidyl-prolyl cis-trans isomerase activity	molecular_function	0.27554	1	26	14743	130	76974	15	11
GO:0016859	cis-trans isomerase activity	molecular_function	0.27554	1	26	14743	130	76974	15	11
GO:0018208	peptidyl-proline modification	biological_process	0.27554	1	26	14743	130	76974	15	11
GO:0019208	phosphatase regulator activity	molecular_function	0.33953	1	26	14743	122	76974	15	11
GO:0005230	extracellular ligand-gated ion channel activity	molecular_function	0.38719	1	24	14743	115	76974	15	9
GO:0000785	chromatin	cellular_component	0.43033	1	23	14743	118	76974	15	8
GO:0042393	histone binding	molecular_function	0.44519	1	24	14743	117	76974	15	9
GO:0019013	viral nucleocapsid	cellular_component	0.59955	1	17	14743	92	76974	15	2
GO:0019783	ubiquitin-like protein-specific protease activity	molecular_function	0.63174	1	18	14743	98	76974	15	3
GO:0010604	positive regulation of macromolecule metabolic process	biological_process	0.76591	1	23	14743	137	76974	15	8
GO:0004721	phosphoprotein phosphatase activity	molecular_function	0.80846	1	27	14743	160	76974	15	12
GO:0055065	metal ion homeostasis	biological_process	0.86087	1	26	14743	172	76974	15	11
GO:0010256	endomembrane system organization	biological_process	0.8654	1	29	14743	180	76974	15	14
GO:0050801	ion homeostasis	biological_process	0.86614	1	26	14743	173	76974	15	11
GO:0055080	cation homeostasis	biological_process	0.86614	1	26	14743	173	76974	15	11
GO:0098771	inorganic ion homeostasis	biological_process	0.86614	1	26	14743	173	76974	15	11
GO:0004177	aminopeptidase activity	molecular_function	0.88121	1	25	14743	154	76974	15	10
GO:0048878	chemical homeostasis	biological_process	0.90153	1	26	14743	178	76974	15	11
GO:0006403	RNA localization	biological_process	0.95731	1	26	14743	191	76974	15	11
GO:0050657	nucleic acid transport	biological_process	0.95731	1	26	14743	191	76974	15	11
GO:0050658	RNA transport	biological_process	0.95731	1	26	14743	191	76974	15	11
GO:0051236	establishment of RNA localization	biological_process	0.95731	1	26	14743	191	76974	15	11
GO:0006869	lipid transport	biological_process	0.97298	1	27	14743	196	76974	15	12
GO:0015931	nucleobase-containing compound transport	biological_process	0.97702	1	26	14743	199	76974	15	11
GO:0000139	Golgi membrane	cellular_component	0.98164	1	23	14743	170	76974	15	8
GO:0046474	glycerophospholipid biosynthetic process	biological_process	0.9826	1	22	14743	175	76974	15	7
GO:0006664	glycolipid metabolic process	biological_process	0.98475	1	24	14743	190	76974	15	9
GO:0009247	glycolipid biosynthetic process	biological_process	0.98475	1	24	14743	190	76974	15	9
GO:0046467	membrane lipid biosynthetic process	biological_process	0.98475	1	24	14743	190	76974	15	9
GO:0006814	sodium ion transport	biological_process	0.99807	1	20	14743	188	76974	15	5
GO:0006754	ATP biosynthetic process	biological_process	0.99925	1	32	14743	275	76974	15	17
GO:0009142	nucleoside triphosphate biosynthetic process	biological_process	0.99985	1	33	14743	301	76974	15	18
GO:0009145	purine nucleoside triphosphate biosynthetic process	biological_process	0.99985	1	33	14743	301	76974	15	18
GO:0009201	ribonucleoside triphosphate biosynthetic process	biological_process	0.99985	1	33	14743	301	76974	15	18
GO:0009206	purine ribonucleoside triphosphate biosynthetic process	biological_process	0.99985	1	33	14743	301	76974	15	18
GO:0030151	molybdenum ion binding	molecular_function	0.003559	0.10736	21	14743	60	76974	14	7
GO:0016161	beta-amylase activity	molecular_function	0.065627	0.74984	22	14743	81	76974	14	8
GO:0006721	terpenoid metabolic process	biological_process	0.086035	0.88795	26	14743	102	76974	14	12
GO:0016114	terpenoid biosynthetic process	biological_process	0.086035	0.88795	26	14743	102	76974	14	12
GO:0006099	tricarboxylic acid cycle	biological_process	0.12907	1	20	14743	79	76974	14	6
GO:0006101	citrate metabolic process	biological_process	0.12907	1	20	14743	79	76974	14	6
GO:0072350	tricarboxylic acid metabolic process	biological_process	0.13349	1	21	14743	84	76974	14	7
GO:0016641	oxidoreductase activity, acting on the CH-NH2 group of donors, oxygen as acceptor	molecular_function	0.18497	1	22	14743	95	76974	14	8
GO:0003746	translation elongation factor activity	molecular_function	0.21496	1	19	14743	86	76974	14	5
GO:0048731	system development	biological_process	0.24305	1	19	14743	88	76974	14	5
GO:0009452	7-methylguanosine RNA capping	biological_process	0.28279	1	21	14743	94	76974	14	7
GO:0036260	RNA capping	biological_process	0.28279	1	21	14743	94	76974	14	7
GO:0004970	ionotropic glutamate receptor activity	molecular_function	0.36887	1	23	14743	109	76974	14	9
GO:0008066	glutamate receptor activity	molecular_function	0.36887	1	23	14743	109	76974	14	9
GO:0000956	nuclear-transcribed mRNA catabolic process	biological_process	0.38757	1	20	14743	97	76974	14	6
GO:0051130	positive regulation of cellular component organization	biological_process	0.39456	1	17	14743	87	76974	14	3
GO:0004427	inorganic diphosphatase activity	molecular_function	0.56722	1	23	14743	120	76974	14	9
GO:0000746	conjugation	biological_process	0.56747	1	20	14743	106	76974	14	6
GO:1901606	alpha-amino acid catabolic process	biological_process	0.5773	1	20	14743	105	76974	14	6
GO:0030029	actin filament-based process	biological_process	0.61353	1	20	14743	109	76974	14	6
GO:0030036	actin cytoskeleton organization	biological_process	0.61353	1	20	14743	109	76974	14	6
GO:0009063	cellular amino acid catabolic process	biological_process	0.62509	1	21	14743	113	76974	14	7
GO:0004611	phosphoenolpyruvate carboxykinase activity	molecular_function	0.6317	1	24	14743	128	76974	14	10
GO:0006777	Mo-molybdopterin cofactor biosynthetic process	biological_process	0.64976	1	16	14743	87	76974	14	2
GO:0019720	Mo-molybdopterin cofactor metabolic process	biological_process	0.64976	1	16	14743	87	76974	14	2
GO:0005672	transcription factor TFIIA complex	cellular_component	0.76406	1	25	14743	145	76974	14	11
GO:0006873	cellular ion homeostasis	biological_process	0.84439	1	25	14743	164	76974	14	11
GO:0006875	cellular metal ion homeostasis	biological_process	0.84439	1	25	14743	164	76974	14	11
GO:0030003	cellular cation homeostasis	biological_process	0.84439	1	25	14743	164	76974	14	11
GO:0055082	cellular chemical homeostasis	biological_process	0.84439	1	25	14743	164	76974	14	11
GO:0005262	calcium channel activity	molecular_function	0.87996	1	20	14743	133	76974	14	6
GO:0045259	proton-transporting ATP synthase complex	cellular_component	0.88721	1	26	14743	175	76974	14	12
GO:0015085	calcium ion transmembrane transporter activity	molecular_function	0.89602	1	20	14743	135	76974	14	6
GO:1901615	organic hydroxy compound metabolic process	biological_process	0.92359	1	24	14743	160	76974	14	10
GO:0009896	positive regulation of catabolic process	biological_process	0.93751	1	32	14743	207	76974	14	18
GO:0010508	positive regulation of autophagy	biological_process	0.93751	1	32	14743	207	76974	14	18
GO:0031331	positive regulation of cellular catabolic process	biological_process	0.93751	1	32	14743	207	76974	14	18
GO:0006304	DNA modification	biological_process	0.95333	1	20	14743	160	76974	14	6
GO:0022406	membrane docking	biological_process	0.98568	1	18	14743	142	76974	14	4
GO:0098797	plasma membrane protein complex	cellular_component	0.99987	1	25	14743	254	76974	14	11
GO:0016717	oxidoreductase activity, acting on paired donors, with oxidation of a pair of donors resulting in the reduction of molecular oxygen to two molecules of water	molecular_function	0.000315	0.018264	19	14743	45	76974	13	6
GO:0004298	threonine-type endopeptidase activity	molecular_function	0.013637	0.28462	27	14743	101	76974	13	14
GO:0070003	threonine-type peptidase activity	molecular_function	0.013637	0.28462	27	14743	101	76974	13	14
GO:0070206	protein trimerization	biological_process	0.035814	0.49758	23	14743	83	76974	13	10
GO:0009288	bacterial-type flagellum	cellular_component	0.059682	0.69892	22	14743	84	76974	13	9
GO:0019888	protein phosphatase regulator activity	molecular_function	0.33321	1	23	14743	107	76974	13	10
GO:0015035	protein disulfide oxidoreductase activity	molecular_function	0.38704	1	25	14743	134	76974	13	12
GO:0015036	disulfide oxidoreductase activity	molecular_function	0.38704	1	25	14743	134	76974	13	12
GO:0006338	chromatin remodeling	biological_process	0.43179	1	22	14743	114	76974	13	9
GO:0010181	FMN binding	molecular_function	0.43252	1	20	14743	101	76974	13	7
GO:1902531	regulation of intracellular signal transduction	biological_process	0.50131	1	15	14743	76	76974	13	2
GO:0004129	cytochrome-c oxidase activity	molecular_function	0.53783	1	18	14743	100	76974	13	5
GO:0016675	oxidoreductase activity, acting on a heme group of donors	molecular_function	0.53783	1	18	14743	100	76974	13	5
GO:0016676	oxidoreductase activity, acting on a heme group of donors, oxygen as acceptor	molecular_function	0.53783	1	18	14743	100	76974	13	5
GO:0015002	heme-copper terminal oxidase activity	molecular_function	0.61999	1	19	14743	110	76974	13	6
GO:0043161	proteasome-mediated ubiquitin-dependent protein catabolic process	biological_process	0.62435	1	23	14743	124	76974	13	10
GO:0016278	lysine N-methyltransferase activity	molecular_function	0.64588	1	21	14743	115	76974	13	8
GO:0016279	protein-lysine N-methyltransferase activity	molecular_function	0.64588	1	21	14743	115	76974	13	8
GO:0018024	histone-lysine N-methyltransferase activity	molecular_function	0.64588	1	21	14743	115	76974	13	8
GO:0042054	histone methyltransferase activity	molecular_function	0.64588	1	21	14743	115	76974	13	8
GO:0010498	proteasomal protein catabolic process	biological_process	0.65767	1	23	14743	126	76974	13	10
GO:0004725	protein tyrosine phosphatase activity	molecular_function	0.66208	1	21	14743	116	76974	13	8
GO:0043241	protein complex disassembly	biological_process	0.68148	1	23	14743	131	76974	13	10
GO:0016886	ligase activity, forming phosphoric ester bonds	molecular_function	0.68604	1	19	14743	106	76974	13	6
GO:0000990	transcription factor activity, core RNA polymerase binding	molecular_function	0.69645	1	20	14743	113	76974	13	7
GO:0000996	core DNA-dependent RNA polymerase binding promoter specificity activity	molecular_function	0.69645	1	20	14743	113	76974	13	7
GO:0016987	sigma factor activity	molecular_function	0.69645	1	20	14743	113	76974	13	7
GO:0016891	endoribonuclease activity, producing 5'-phosphomonoesters	molecular_function	0.74236	1	26	14743	150	76974	13	13
GO:0030030	cell projection organization	biological_process	0.76453	1	17	14743	107	76974	13	4
GO:0022411	cellular component disassembly	biological_process	0.82161	1	23	14743	142	76974	13	10
GO:0032984	macromolecular complex disassembly	biological_process	0.82161	1	23	14743	142	76974	13	10
GO:0033043	regulation of organelle organization	biological_process	0.88737	1	27	14743	172	76974	13	14
GO:0006874	cellular calcium ion homeostasis	biological_process	0.91223	1	19	14743	136	76974	13	6
GO:0055074	calcium ion homeostasis	biological_process	0.91223	1	19	14743	136	76974	13	6
GO:0072503	cellular divalent inorganic cation homeostasis	biological_process	0.91223	1	19	14743	136	76974	13	6
GO:0072507	divalent inorganic cation homeostasis	biological_process	0.91223	1	19	14743	136	76974	13	6
GO:0098799	outer mitochondrial membrane protein complex	cellular_component	0.91662	1	14	14743	99	76974	13	1
GO:0006497	protein lipidation	biological_process	0.9522	1	19	14743	145	76974	13	6
GO:0006505	GPI anchor metabolic process	biological_process	0.9522	1	19	14743	145	76974	13	6
GO:0006506	GPI anchor biosynthetic process	biological_process	0.9522	1	19	14743	145	76974	13	6
GO:0006661	phosphatidylinositol biosynthetic process	biological_process	0.9522	1	19	14743	145	76974	13	6
GO:0005096	GTPase activator activity	molecular_function	0.95601	1	19	14743	133	76974	13	6
GO:0006790	sulfur compound metabolic process	biological_process	0.96149	1	25	14743	172	76974	13	12
GO:0042158	lipoprotein biosynthetic process	biological_process	0.96252	1	19	14743	148	76974	13	6
GO:0033180	proton-transporting V-type ATPase, V1 domain	cellular_component	0.96334	1	24	14743	172	76974	13	11
GO:0015985	energy coupled proton transport, down electrochemical gradient	biological_process	0.9993	1	30	14743	263	76974	13	17
GO:0015986	ATP synthesis coupled proton transport	biological_process	0.9993	1	30	14743	263	76974	13	17
GO:0015081	sodium ion transmembrane transporter activity	molecular_function	0.99941	1	17	14743	179	76974	13	4
GO:0001101	response to acid chemical	biological_process	0.001661	0.062601	13	14743	32	76974	12	1
GO:0007131	reciprocal meiotic recombination	biological_process	0.003567	0.10736	16	14743	42	76974	12	4
GO:0035825	reciprocal DNA recombination	biological_process	0.003567	0.10736	16	14743	42	76974	12	4
GO:0009539	photosystem II reaction center	cellular_component	0.026467	0.40618	16	14743	52	76974	12	4
GO:0016307	phosphatidylinositol phosphate kinase activity	molecular_function	0.052626	0.63221	18	14743	62	76974	12	6
GO:1901700	response to oxygen-containing compound	biological_process	0.057282	0.67739	14	14743	51	76974	12	2
GO:0043015	gamma-tubulin binding	molecular_function	0.083169	0.86985	23	14743	87	76974	12	11
GO:0008312	7S RNA binding	molecular_function	0.11013	1	14	14743	55	76974	12	2
GO:0048500	signal recognition particle	cellular_component	0.11013	1	14	14743	55	76974	12	2
GO:0006570	tyrosine metabolic process	biological_process	0.1652	1	12	14743	46	76974	12	0
GO:0019083	viral transcription	biological_process	0.21597	1	20	14743	85	76974	12	8
GO:0000041	transition metal ion transport	biological_process	0.23053	1	24	14743	115	76974	12	12
GO:0080134	regulation of response to stress	biological_process	0.26767	1	14	14743	62	76974	12	2
GO:0042546	cell wall biogenesis	biological_process	0.31535	1	14	14743	62	76974	12	2
GO:0009314	response to radiation	biological_process	0.3304	1	16	14743	71	76974	12	4
GO:0016655	oxidoreductase activity, acting on NAD(P)H, quinone or similar compound as acceptor	molecular_function	0.38535	1	18	14743	93	76974	12	6
GO:0030599	pectinesterase activity	molecular_function	0.40563	1	21	14743	100	76974	12	9
GO:0042545	cell wall modification	biological_process	0.40563	1	21	14743	100	76974	12	9
GO:0003995	acyl-CoA dehydrogenase activity	molecular_function	0.43438	1	18	14743	86	76974	12	6
GO:0017119	Golgi transport complex	cellular_component	0.55009	1	20	14743	103	76974	12	8
GO:0048038	quinone binding	molecular_function	0.6602	1	19	14743	103	76974	12	7
GO:0009522	photosystem I	cellular_component	0.72335	1	14	14743	91	76974	12	2
GO:0006298	mismatch repair	biological_process	0.72743	1	19	14743	107	76974	12	7
GO:0006955	immune response	biological_process	0.76138	1	24	14743	141	76974	12	12
GO:0016679	oxidoreductase activity, acting on diphenols and related substances as donors	molecular_function	0.77786	1	19	14743	119	76974	12	7
GO:0035821	modification of morphology or physiology of other organism	biological_process	0.78566	1	16	14743	99	76974	12	4
GO:0005217	intracellular ligand-gated ion channel activity	molecular_function	0.79525	1	17	14743	108	76974	12	5
GO:0005218	intracellular ligand-gated calcium channel activity	molecular_function	0.79525	1	17	14743	108	76974	12	5
GO:0005219	ryanodine-sensitive calcium-release channel activity	molecular_function	0.79525	1	17	14743	108	76974	12	5
GO:0015278	calcium-release channel activity	molecular_function	0.79525	1	17	14743	108	76974	12	5
GO:0060590	ATPase regulator activity	molecular_function	0.82382	1	20	14743	132	76974	12	8
GO:0008272	sulfate transport	biological_process	0.82934	1	13	14743	82	76974	12	1
GO:0015116	sulfate transmembrane transporter activity	molecular_function	0.82934	1	13	14743	82	76974	12	1
GO:1901682	sulfur compound transmembrane transporter activity	molecular_function	0.82934	1	13	14743	82	76974	12	1
GO:0072348	sulfur compound transport	biological_process	0.83814	1	13	14743	83	76974	12	1
GO:0010628	positive regulation of gene expression	biological_process	0.85512	1	18	14743	117	76974	12	6
GO:0033218	amide binding	molecular_function	0.88009	1	12	14743	85	76974	12	0
GO:0071806	protein transmembrane transport	biological_process	0.88034	1	13	14743	91	76974	12	1
GO:0018995	host	cellular_component	0.90593	1	22	14743	150	76974	12	10
GO:0033643	host cell part	cellular_component	0.90593	1	22	14743	150	76974	12	10
GO:0043657	host cell	cellular_component	0.90593	1	22	14743	150	76974	12	10
GO:0044215	other organism	cellular_component	0.90593	1	22	14743	150	76974	12	10
GO:0044216	other organism cell	cellular_component	0.90593	1	22	14743	150	76974	12	10
GO:0044217	other organism part	cellular_component	0.90593	1	22	14743	150	76974	12	10
GO:0006904	vesicle docking involved in exocytosis	biological_process	0.92986	1	16	14743	109	76974	12	4
GO:0000221	vacuolar proton-transporting V-type ATPase, V1 domain	cellular_component	0.93913	1	22	14743	153	76974	12	10
GO:0016471	vacuolar proton-transporting V-type ATPase complex	cellular_component	0.93913	1	22	14743	153	76974	12	10
GO:0005774	vacuolar membrane	cellular_component	0.94356	1	22	14743	154	76974	12	10
GO:0044437	vacuolar part	cellular_component	0.94356	1	22	14743	154	76974	12	10
GO:0005773	vacuole	cellular_component	0.96432	1	22	14743	160	76974	12	10
GO:0048278	vesicle docking	biological_process	0.97871	1	16	14743	122	76974	12	4
GO:0009584	detection of visible light	biological_process	0.01245	0.2784	15	14743	42	76974	11	4
GO:0051052	regulation of DNA metabolic process	biological_process	0.0144	0.2953	15	14743	44	76974	11	4
GO:0006595	polyamine metabolic process	biological_process	0.015637	0.30315	13	14743	36	76974	11	2
GO:0006596	polyamine biosynthetic process	biological_process	0.015637	0.30315	13	14743	36	76974	11	2
GO:0097164	ammonium ion metabolic process	biological_process	0.015637	0.30315	13	14743	36	76974	11	2
GO:0018298	protein-chromophore linkage	biological_process	0.015687	0.30315	15	14743	43	76974	11	4
GO:0009309	amine biosynthetic process	biological_process	0.016115	0.30888	14	14743	40	76974	11	3
GO:0042401	cellular biogenic amine biosynthetic process	biological_process	0.016115	0.30888	14	14743	40	76974	11	3
GO:0009581	detection of external stimulus	biological_process	0.019535	0.3348	15	14743	44	76974	11	4
GO:0009582	detection of abiotic stimulus	biological_process	0.019535	0.3348	15	14743	44	76974	11	4
GO:0009583	detection of light stimulus	biological_process	0.019535	0.3348	15	14743	44	76974	11	4
GO:0051606	detection of stimulus	biological_process	0.024058	0.38558	15	14743	45	76974	11	4
GO:0004506	squalene monooxygenase activity	molecular_function	0.11708	1	15	14743	56	76974	11	4
GO:0008094	DNA-dependent ATPase activity	molecular_function	0.12621	1	30	14743	127	76974	11	19
GO:0016811	hydrolase activity, acting on carbon-nitrogen (but not peptide) bonds, in linear amides	molecular_function	0.14315	1	22	14743	94	76974	11	11
GO:0015095	magnesium ion transmembrane transporter activity	molecular_function	0.15332	1	20	14743	81	76974	11	9
GO:0015693	magnesium ion transport	biological_process	0.15332	1	20	14743	81	76974	11	9
GO:0016458	gene silencing	biological_process	0.19377	1	18	14743	74	76974	11	7
GO:0016272	prefoldin complex	cellular_component	0.19697	1	17	14743	74	76974	11	6
GO:0046915	transition metal ion transmembrane transporter activity	molecular_function	0.21076	1	23	14743	107	76974	11	12
GO:0005199	structural constituent of cell wall	molecular_function	0.31016	1	13	14743	62	76974	11	2
GO:0009416	response to light stimulus	biological_process	0.39531	1	15	14743	69	76974	11	4
GO:0051087	chaperone binding	molecular_function	0.3982	1	20	14743	99	76974	11	9
GO:0008175	tRNA methyltransferase activity	molecular_function	0.51051	1	23	14743	119	76974	11	12
GO:0003860	3-hydroxyisobutyryl-CoA hydrolase activity	molecular_function	0.51255	1	16	14743	83	76974	11	5
GO:0016289	CoA hydrolase activity	molecular_function	0.51255	1	16	14743	83	76974	11	5
GO:0032182	ubiquitin-like protein binding	molecular_function	0.53863	1	16	14743	84	76974	11	5
GO:0043624	cellular protein complex disassembly	biological_process	0.64653	1	20	14743	113	76974	11	9
GO:0008026	ATP-dependent helicase activity	molecular_function	0.72015	1	23	14743	130	76974	11	12
GO:0070035	purine NTP-dependent helicase activity	molecular_function	0.72015	1	23	14743	130	76974	11	12
GO:0030983	mismatched DNA binding	molecular_function	0.7258	1	17	14743	96	76974	11	6
GO:0043021	ribonucleoprotein complex binding	molecular_function	0.73892	1	13	14743	80	76974	11	2
GO:0009678	hydrogen-translocating pyrophosphatase activity	molecular_function	0.77031	1	17	14743	98	76974	11	6
GO:0016881	acid-amino acid ligase activity	molecular_function	0.78885	1	16	14743	94	76974	11	5
GO:0044003	modification by symbiont of host morphology or physiology	biological_process	0.79231	1	15	14743	94	76974	11	4
GO:0051817	modification of morphology or physiology of other organism involved in symbiotic interaction	biological_process	0.79231	1	15	14743	94	76974	11	4
GO:0051336	regulation of hydrolase activity	biological_process	0.80941	1	12	14743	78	76974	11	1
GO:0006094	gluconeogenesis	biological_process	0.82306	1	18	14743	110	76974	11	7
GO:0019319	hexose biosynthetic process	biological_process	0.82306	1	18	14743	110	76974	11	7
GO:0046364	monosaccharide biosynthetic process	biological_process	0.82306	1	18	14743	110	76974	11	7
GO:0045263	proton-transporting ATP synthase complex, coupling factor F(o)	cellular_component	0.82334	1	22	14743	144	76974	11	11
GO:0006891	intra-Golgi vesicle-mediated transport	biological_process	0.83334	1	18	14743	111	76974	11	7
GO:0030154	cell differentiation	biological_process	0.84595	1	22	14743	144	76974	11	11
GO:0022884	macromolecule transmembrane transporter activity	molecular_function	0.84606	1	15	14743	111	76974	11	4
GO:0009236	cobalamin biosynthetic process	biological_process	0.89127	1	15	14743	102	76974	11	4
GO:0044272	sulfur compound biosynthetic process	biological_process	0.89328	1	21	14743	134	76974	11	10
GO:0009341	beta-galactosidase complex	cellular_component	0.90581	1	14	14743	94	76974	11	3
GO:0009891	positive regulation of biosynthetic process	biological_process	0.9106	1	16	14743	112	76974	11	5
GO:0010557	positive regulation of macromolecule biosynthetic process	biological_process	0.9106	1	16	14743	112	76974	11	5
GO:0031328	positive regulation of cellular biosynthetic process	biological_process	0.9106	1	16	14743	112	76974	11	5
GO:0051173	positive regulation of nitrogen compound metabolic process	biological_process	0.9106	1	16	14743	112	76974	11	5
GO:0000778	condensed nuclear chromosome kinetochore	cellular_component	0.91366	1	18	14743	122	76974	11	7
GO:0000780	condensed nuclear chromosome, centromeric region	cellular_component	0.91366	1	18	14743	122	76974	11	7
GO:0000942	condensed nuclear chromosome outer kinetochore	cellular_component	0.91366	1	18	14743	122	76974	11	7
GO:0042729	DASH complex	cellular_component	0.91366	1	18	14743	122	76974	11	7
GO:0009235	cobalamin metabolic process	biological_process	0.91442	1	15	14743	105	76974	11	4
GO:0008138	protein tyrosine/serine/threonine phosphatase activity	molecular_function	0.93293	1	19	14743	129	76974	11	8
GO:0004565	beta-galactosidase activity	molecular_function	0.94113	1	14	14743	100	76974	11	3
GO:0006066	alcohol metabolic process	biological_process	0.95416	1	18	14743	131	76974	11	7
GO:0005681	spliceosomal complex	cellular_component	0.96763	1	15	14743	118	76974	11	4
GO:0015923	mannosidase activity	molecular_function	0.98437	1	17	14743	131	76974	11	6
GO:0000278	mitotic cell cycle	biological_process	0.99301	1	20	14743	164	76974	11	9
GO:1903047	mitotic cell cycle process	biological_process	0.99301	1	20	14743	164	76974	11	9
GO:0030176	integral component of endoplasmic reticulum membrane	cellular_component	0.99657	1	13	14743	131	76974	11	2
GO:0031227	intrinsic component of endoplasmic reticulum membrane	cellular_component	0.99657	1	13	14743	131	76974	11	2
GO:0009415	response to water	biological_process	0.000189	0.011404	11	14743	21	76974	10	1
GO:0004619	phosphoglycerate mutase activity	molecular_function	0.002545	0.082432	13	14743	32	76974	10	3
GO:0010207	photosystem II assembly	biological_process	0.011846	0.26874	18	14743	55	76974	10	8
GO:0003993	acid phosphatase activity	molecular_function	0.19246	1	25	14743	106	76974	10	15
GO:0000075	cell cycle checkpoint	biological_process	0.19269	1	21	14743	91	76974	10	11
GO:1901068	guanosine-containing compound metabolic process	biological_process	0.2421	1	16	14743	70	76974	10	6
GO:0005231	excitatory extracellular ligand-gated ion channel activity	molecular_function	0.24522	1	18	14743	76	76974	10	8
GO:0046912	transferase activity, transferring acyl groups, acyl groups converted into alkyl on transfer	molecular_function	0.24838	1	15	14743	65	76974	10	5
GO:0008064	regulation of actin polymerization or depolymerization	biological_process	0.24981	1	15	14743	66	76974	10	5
GO:0008154	actin polymerization or depolymerization	biological_process	0.24981	1	15	14743	66	76974	10	5
GO:0030041	actin filament polymerization	biological_process	0.24981	1	15	14743	66	76974	10	5
GO:0030832	regulation of actin filament length	biological_process	0.24981	1	15	14743	66	76974	10	5
GO:0030833	regulation of actin filament polymerization	biological_process	0.24981	1	15	14743	66	76974	10	5
GO:0032271	regulation of protein polymerization	biological_process	0.24981	1	15	14743	66	76974	10	5
GO:0032535	regulation of cellular component size	biological_process	0.24981	1	15	14743	66	76974	10	5
GO:0032956	regulation of actin cytoskeleton organization	biological_process	0.24981	1	15	14743	66	76974	10	5
GO:0032970	regulation of actin filament-based process	biological_process	0.24981	1	15	14743	66	76974	10	5
GO:0043254	regulation of protein complex assembly	biological_process	0.24981	1	15	14743	66	76974	10	5
GO:0071973	bacterial-type flagellum-dependent cell motility	biological_process	0.25956	1	15	14743	66	76974	10	5
GO:0031047	gene silencing by RNA	biological_process	0.27422	1	16	14743	69	76974	10	6
GO:0008131	primary amine oxidase activity	molecular_function	0.27536	1	16	14743	69	76974	10	6
GO:0016840	carbon-nitrogen lyase activity	molecular_function	0.31085	1	12	14743	54	76974	10	2
GO:0016571	histone methylation	biological_process	0.31374	1	17	14743	75	76974	10	7
GO:0018022	peptidyl-lysine methylation	biological_process	0.31374	1	17	14743	75	76974	10	7
GO:0034968	histone lysine methylation	biological_process	0.31374	1	17	14743	75	76974	10	7
GO:0051493	regulation of cytoskeleton organization	biological_process	0.32422	1	19	14743	90	76974	10	9
GO:0001539	cilium or flagellum-dependent cell motility	biological_process	0.32531	1	15	14743	69	76974	10	5
GO:0097588	archaeal or bacterial-type flagellum-dependent cell motility	biological_process	0.32531	1	15	14743	69	76974	10	5
GO:0090066	regulation of anatomical structure size	biological_process	0.3563	1	15	14743	71	76974	10	5
GO:0044087	regulation of cellular component biogenesis	biological_process	0.36257	1	18	14743	86	76974	10	8
GO:0005085	guanyl-nucleotide exchange factor activity	molecular_function	0.39176	1	17	14743	79	76974	10	7
GO:0008483	transaminase activity	molecular_function	0.44453	1	13	14743	63	76974	10	3
GO:0016769	transferase activity, transferring nitrogenous groups	molecular_function	0.44453	1	13	14743	63	76974	10	3
GO:0000790	nuclear chromatin	cellular_component	0.45037	1	15	14743	76	76974	10	5
GO:0004535	poly(A)-specific ribonuclease activity	molecular_function	0.477	1	16	14743	82	76974	10	6
GO:0000922	spindle pole	cellular_component	0.48958	1	18	14743	88	76974	10	8
GO:0042597	periplasmic space	cellular_component	0.5166	1	17	14743	92	76974	10	7
GO:0007015	actin filament organization	biological_process	0.57933	1	15	14743	81	76974	10	5
GO:0004594	pantothenate kinase activity	molecular_function	0.61938	1	10	14743	53	76974	10	0
GO:0004520	endodeoxyribonuclease activity	molecular_function	0.66167	1	14	14743	79	76974	10	4
GO:0033926	glycopeptide alpha-N-acetylgalactosaminidase activity	molecular_function	0.66678	1	12	14743	66	76974	10	2
GO:0000175	3'-5'-exoribonuclease activity	molecular_function	0.67958	1	17	14743	97	76974	10	7
GO:0004532	exoribonuclease activity	molecular_function	0.67958	1	17	14743	97	76974	10	7
GO:0016896	exoribonuclease activity, producing 5'-phosphomonoesters	molecular_function	0.67958	1	17	14743	97	76974	10	7
GO:0051028	mRNA transport	biological_process	0.74428	1	18	14743	105	76974	10	8
GO:0019048	modulation by virus of host morphology or physiology	biological_process	0.78866	1	14	14743	88	76974	10	4
GO:0005753	mitochondrial proton-transporting ATP synthase complex	cellular_component	0.83781	1	17	14743	114	76974	10	7
GO:0007006	mitochondrial membrane organization	biological_process	0.86711	1	12	14743	79	76974	10	2
GO:0030414	peptidase inhibitor activity	molecular_function	0.88979	1	12	14743	90	76974	10	2
GO:0061134	peptidase regulator activity	molecular_function	0.88979	1	12	14743	90	76974	10	2
GO:0004559	alpha-mannosidase activity	molecular_function	0.8948	1	16	14743	103	76974	10	6
GO:0005882	intermediate filament	cellular_component	0.90427	1	26	14743	164	76974	10	16
GO:0045111	intermediate filament cytoskeleton	cellular_component	0.90427	1	26	14743	164	76974	10	16
GO:0005730	nucleolus	cellular_component	0.93563	1	16	14743	118	76974	10	6
GO:0065002	intracellular protein transmembrane transport	biological_process	0.93814	1	11	14743	86	76974	10	1
GO:0044743	intracellular protein transmembrane import	biological_process	0.95268	1	10	14743	82	76974	10	0
GO:0005742	mitochondrial outer membrane translocase complex	cellular_component	0.95392	1	11	14743	86	76974	10	1
GO:0007067	mitotic nuclear division	biological_process	0.9835	1	18	14743	142	76974	10	8
GO:0016459	myosin complex	cellular_component	0.99642	1	18	14743	153	76974	10	8
GO:0004144	diacylglycerol O-acyltransferase activity	molecular_function	0.000362	0.019763	16	14743	35	76974	9	7
GO:0016411	acylglycerol O-acyltransferase activity	molecular_function	0.000362	0.019763	16	14743	35	76974	9	7
GO:0009733	response to auxin	biological_process	0.012298	0.27632	15	14743	53	76974	9	6
GO:0006282	regulation of DNA repair	biological_process	0.018255	0.32107	9	14743	22	76974	9	0
GO:0080135	regulation of cellular response to stress	biological_process	0.018255	0.32107	9	14743	22	76974	9	0
GO:2001020	regulation of response to DNA damage stimulus	biological_process	0.018255	0.32107	9	14743	22	76974	9	0
GO:0015969	guanosine tetraphosphate metabolic process	biological_process	0.035027	0.48955	13	14743	39	76974	9	4
GO:0034035	purine ribonucleoside bisphosphate metabolic process	biological_process	0.035027	0.48955	13	14743	39	76974	9	4
GO:0006597	spermine biosynthetic process	biological_process	0.036779	0.50501	11	14743	32	76974	9	2
GO:0008215	spermine metabolic process	biological_process	0.036779	0.50501	11	14743	32	76974	9	2
GO:0019773	proteasome core complex, alpha-subunit complex	cellular_component	0.042647	0.55323	18	14743	67	76974	9	9
GO:0004014	adenosylmethionine decarboxylase activity	molecular_function	0.04575	0.57637	11	14743	33	76974	9	2
GO:0008216	spermidine metabolic process	biological_process	0.04575	0.57637	11	14743	33	76974	9	2
GO:0008295	spermidine biosynthetic process	biological_process	0.04575	0.57637	11	14743	33	76974	9	2
GO:0044462	external encapsulating structure part	cellular_component	0.056132	0.66564	12	14743	39	76974	9	3
GO:0030313	cell envelope	cellular_component	0.067192	0.76401	12	14743	40	76974	9	3
GO:0006536	glutamate metabolic process	biological_process	0.097536	0.96631	21	14743	83	76974	9	12
GO:0015696	ammonium transport	biological_process	0.10409	1	12	14743	43	76974	9	3
GO:0030955	potassium ion binding	molecular_function	0.10735	1	23	14743	90	76974	9	14
GO:0031420	alkali metal ion binding	molecular_function	0.10735	1	23	14743	90	76974	9	14
GO:0002097	tRNA wobble base modification	biological_process	0.11869	1	18	14743	70	76974	9	9
GO:0016776	phosphotransferase activity, phosphate group as acceptor	molecular_function	0.13303	1	16	14743	66	76974	9	7
GO:0004143	diacylglycerol kinase activity	molecular_function	0.15293	1	9	14743	32	76974	9	0
GO:0008519	ammonium transmembrane transporter activity	molecular_function	0.15481	1	12	14743	46	76974	9	3
GO:0006083	acetate metabolic process	biological_process	0.21718	1	13	14743	52	76974	9	4
GO:0005234	extracellular-glutamate-gated ion channel activity	molecular_function	0.25867	1	17	14743	72	76974	9	8
GO:0016298	lipase activity	molecular_function	0.26572	1	15	14743	65	76974	9	6
GO:0006487	protein N-linked glycosylation	biological_process	0.26833	1	14	14743	61	76974	9	5
GO:0000394	RNA splicing, via endonucleolytic cleavage and ligation	biological_process	0.28843	1	10	14743	43	76974	9	1
GO:0006388	tRNA splicing, via endonucleolytic cleavage and ligation	biological_process	0.28843	1	10	14743	43	76974	9	1
GO:0009095	aromatic amino acid family biosynthetic process, prephenate pathway	biological_process	0.29712	1	12	14743	52	76974	9	3
GO:0006935	chemotaxis	biological_process	0.322	1	12	14743	58	76974	9	3
GO:0042330	taxis	biological_process	0.322	1	12	14743	58	76974	9	3
GO:0010638	positive regulation of organelle organization	biological_process	0.33278	1	12	14743	54	76974	9	3
GO:0045735	nutrient reservoir activity	molecular_function	0.45025	1	16	14743	90	76974	9	7
GO:0003684	damaged DNA binding	molecular_function	0.50194	1	16	14743	80	76974	9	7
GO:0009615	response to virus	biological_process	0.51464	1	18	14743	93	76974	9	9
GO:0030904	retromer complex	cellular_component	0.51678	1	15	14743	74	76974	9	6
GO:0044801	single-organism membrane fusion	biological_process	0.52719	1	17	14743	89	76974	9	8
GO:0016857	racemase and epimerase activity, acting on carbohydrates and derivatives	molecular_function	0.53606	1	10	14743	52	76974	9	1
GO:0003729	mRNA binding	molecular_function	0.53771	1	11	14743	57	76974	9	2
GO:0044822	poly(A) RNA binding	molecular_function	0.53771	1	11	14743	57	76974	9	2
GO:0048284	organelle fusion	biological_process	0.57345	1	16	14743	86	76974	9	7
GO:0005874	microtubule	cellular_component	0.59341	1	14	14743	75	76974	9	5
GO:0005876	spindle microtubule	cellular_component	0.59341	1	14	14743	75	76974	9	5
GO:0006415	translational termination	biological_process	0.64308	1	15	14743	85	76974	9	6
GO:0042147	retrograde transport, endosome to Golgi	biological_process	0.64787	1	15	14743	80	76974	9	6
GO:0004612	phosphoenolpyruvate carboxykinase (ATP) activity	molecular_function	0.64828	1	14	14743	76	76974	9	5
GO:0004843	ubiquitin-specific protease activity	molecular_function	0.64945	1	10	14743	56	76974	9	1
GO:0022904	respiratory electron transport chain	biological_process	0.65688	1	15	14743	89	76974	9	6
GO:0008287	protein serine/threonine phosphatase complex	cellular_component	0.68129	1	16	14743	89	76974	9	7
GO:1903293	phosphatase complex	cellular_component	0.68129	1	16	14743	89	76974	9	7
GO:0008443	phosphofructokinase activity	molecular_function	0.71828	1	22	14743	126	76974	9	13
GO:0009084	glutamine family amino acid biosynthetic process	biological_process	0.72108	1	21	14743	120	76974	9	12
GO:0000723	telomere maintenance	biological_process	0.74134	1	14	14743	80	76974	9	5
GO:0032200	telomere organization	biological_process	0.74134	1	14	14743	80	76974	9	5
GO:0060249	anatomical structure homeostasis	biological_process	0.74134	1	14	14743	80	76974	9	5
GO:0019200	carbohydrate kinase activity	molecular_function	0.75672	1	22	14743	129	76974	9	13
GO:0016197	endosomal transport	biological_process	0.78852	1	15	14743	89	76974	9	6
GO:0006289	nucleotide-excision repair	biological_process	0.83771	1	15	14743	94	76974	9	6
GO:0006835	dicarboxylic acid transport	biological_process	0.83979	1	19	14743	126	76974	9	10
GO:0005048	signal sequence binding	molecular_function	0.84701	1	9	14743	64	76974	9	0
GO:0042277	peptide binding	molecular_function	0.84701	1	9	14743	64	76974	9	0
GO:0033646	host intracellular part	cellular_component	0.8615	1	16	14743	106	76974	9	7
GO:0043656	intracellular region of host	cellular_component	0.8615	1	16	14743	106	76974	9	7
GO:0005852	eukaryotic translation initiation factor 3 complex	cellular_component	0.86425	1	16	14743	105	76974	9	7
GO:0008608	attachment of spindle microtubules to kinetochore	biological_process	0.87725	1	15	14743	100	76974	9	6
GO:0008855	exodeoxyribonuclease VII activity	molecular_function	0.89608	1	17	14743	115	76974	9	8
GO:0017016	Ras GTPase binding	molecular_function	0.91481	1	15	14743	100	76974	9	6
GO:0031267	small GTPase binding	molecular_function	0.91481	1	15	14743	100	76974	9	6
GO:0051020	GTPase binding	molecular_function	0.91481	1	15	14743	100	76974	9	6
GO:0034453	microtubule anchoring	biological_process	0.91602	1	15	14743	105	76974	9	6
GO:0004529	exodeoxyribonuclease activity	molecular_function	0.92701	1	17	14743	120	76974	9	8
GO:0016895	exodeoxyribonuclease activity, producing 5'-phosphomonoesters	molecular_function	0.92701	1	17	14743	120	76974	9	8
GO:0070887	cellular response to chemical stimulus	biological_process	0.94257	1	12	14743	98	76974	9	3
GO:0000077	DNA damage checkpoint	biological_process	0.002301	0.076599	15	14743	37	76974	8	7
GO:0031570	DNA integrity checkpoint	biological_process	0.002301	0.076599	15	14743	37	76974	8	7
GO:0005086	ARF guanyl-nucleotide exchange factor activity	molecular_function	0.028421	0.42915	10	14743	27	76974	8	2
GO:0032011	ARF protein signal transduction	biological_process	0.028421	0.42915	10	14743	27	76974	8	2
GO:0032012	regulation of ARF protein signal transduction	biological_process	0.028421	0.42915	10	14743	27	76974	8	2
GO:0031225	anchored component of membrane	cellular_component	0.032597	0.47391	9	14743	25	76974	8	1
GO:0002098	tRNA wobble uridine modification	biological_process	0.053419	0.6389	15	14743	50	76974	8	7
GO:0009279	cell outer membrane	cellular_component	0.053519	0.6389	8	14743	22	76974	8	0
GO:0008417	fucosyltransferase activity	molecular_function	0.11574	1	11	14743	38	76974	8	3
GO:0005885	Arp2/3 protein complex	cellular_component	0.12485	1	10	14743	36	76974	8	2
GO:0003972	RNA ligase (ATP) activity	molecular_function	0.12637	1	9	14743	31	76974	8	1
GO:0030915	Smc5-Smc6 complex	cellular_component	0.12667	1	14	14743	52	76974	8	6
GO:0008452	RNA ligase activity	molecular_function	0.16345	1	9	14743	33	76974	8	1
GO:0030838	positive regulation of actin filament polymerization	biological_process	0.16648	1	10	14743	38	76974	8	2
GO:0031334	positive regulation of protein complex assembly	biological_process	0.16648	1	10	14743	38	76974	8	2
GO:0032273	positive regulation of protein polymerization	biological_process	0.16648	1	10	14743	38	76974	8	2
GO:0034314	Arp2/3 complex-mediated actin nucleation	biological_process	0.16648	1	10	14743	38	76974	8	2
GO:0044089	positive regulation of cellular component biogenesis	biological_process	0.16648	1	10	14743	38	76974	8	2
GO:0045010	actin nucleation	biological_process	0.16648	1	10	14743	38	76974	8	2
GO:0051495	positive regulation of cytoskeleton organization	biological_process	0.16648	1	10	14743	38	76974	8	2
GO:0007205	protein kinase C-activating G-protein coupled receptor signaling pathway	biological_process	0.16898	1	8	14743	28	76974	8	0
GO:0006359	regulation of transcription from RNA polymerase III promoter	biological_process	0.18243	1	14	14743	59	76974	8	6
GO:0043903	regulation of symbiosis, encompassing mutualism through parasitism	biological_process	0.19925	1	12	14743	47	76974	8	4
GO:0030145	manganese ion binding	molecular_function	0.20192	1	10	14743	40	76974	8	2
GO:0003950	NAD+ ADP-ribosyltransferase activity	molecular_function	0.21247	1	16	14743	66	76974	8	8
GO:0043066	negative regulation of apoptotic process	biological_process	0.28282	1	10	14743	43	76974	8	2
GO:0043069	negative regulation of programmed cell death	biological_process	0.28282	1	10	14743	43	76974	8	2
GO:0060548	negative regulation of cell death	biological_process	0.28282	1	10	14743	43	76974	8	2
GO:0007029	endoplasmic reticulum organization	biological_process	0.33974	1	12	14743	54	76974	8	4
GO:0007265	Ras protein signal transduction	biological_process	0.3735	1	10	14743	44	76974	8	2
GO:0046578	regulation of Ras protein signal transduction	biological_process	0.3735	1	10	14743	44	76974	8	2
GO:0008121	ubiquinol-cytochrome-c reductase activity	molecular_function	0.3822	1	13	14743	64	76974	8	5
GO:0016681	oxidoreductase activity, acting on diphenols and related substances as donors, cytochrome as acceptor	molecular_function	0.3822	1	13	14743	64	76974	8	5
GO:0007020	microtubule nucleation	biological_process	0.42013	1	14	14743	65	76974	8	6
GO:0046785	microtubule polymerization	biological_process	0.42013	1	14	14743	65	76974	8	6
GO:0016846	carbon-sulfur lyase activity	molecular_function	0.42078	1	13	14743	68	76974	8	5
GO:0051056	regulation of small GTPase mediated signal transduction	biological_process	0.42338	1	10	14743	46	76974	8	2
GO:0004470	malic enzyme activity	molecular_function	0.43203	1	13	14743	61	76974	8	5
GO:0004471	malate dehydrogenase (decarboxylating) (NAD+) activity	molecular_function	0.43203	1	13	14743	61	76974	8	5
GO:0005092	GDP-dissociation inhibitor activity	molecular_function	0.45967	1	13	14743	64	76974	8	5
GO:0000123	histone acetyltransferase complex	cellular_component	0.47364	1	13	14743	64	76974	8	5
GO:0031248	protein acetyltransferase complex	cellular_component	0.47364	1	13	14743	64	76974	8	5
GO:1902493	acetyltransferase complex	cellular_component	0.47364	1	13	14743	64	76974	8	5
GO:0031109	microtubule polymerization or depolymerization	biological_process	0.50265	1	15	14743	74	76974	8	7
GO:0004499	N,N-dimethylaniline monooxygenase activity	molecular_function	0.55093	1	14	14743	72	76974	8	6
GO:0016615	malate dehydrogenase activity	molecular_function	0.55676	1	13	14743	66	76974	8	5
GO:0016423	tRNA (guanine) methyltransferase activity	molecular_function	0.57672	1	18	14743	95	76974	8	10
GO:0005801	cis-Golgi network	cellular_component	0.57904	1	15	14743	79	76974	8	7
GO:0042775	mitochondrial ATP synthesis coupled electron transport	biological_process	0.62615	1	13	14743	76	76974	8	5
GO:0008172	S-methyltransferase activity	molecular_function	0.62936	1	14	14743	77	76974	8	6
GO:0005047	signal recognition particle binding	molecular_function	0.6412	1	10	14743	55	76974	8	2
GO:0008137	NADH dehydrogenase (ubiquinone) activity	molecular_function	0.72151	1	12	14743	76	76974	8	4
GO:0050136	NADH dehydrogenase (quinone) activity	molecular_function	0.72151	1	12	14743	76	76974	8	4
GO:0000276	mitochondrial proton-transporting ATP synthase complex, coupling factor F(o)	cellular_component	0.72459	1	15	14743	94	76974	8	7
GO:0016888	endodeoxyribonuclease activity, producing 5'-phosphomonoesters	molecular_function	0.74633	1	9	14743	56	76974	8	1
GO:0000921	septin ring assembly	biological_process	0.75033	1	12	14743	72	76974	8	4
GO:0005940	septin ring	cellular_component	0.75033	1	12	14743	72	76974	8	4
GO:0031106	septin ring organization	biological_process	0.75033	1	12	14743	72	76974	8	4
GO:0032156	septin cytoskeleton	cellular_component	0.75033	1	12	14743	72	76974	8	4
GO:0032185	septin cytoskeleton organization	biological_process	0.75033	1	12	14743	72	76974	8	4
GO:0006119	oxidative phosphorylation	biological_process	0.75713	1	13	14743	83	76974	8	5
GO:0042773	ATP synthesis coupled electron transport	biological_process	0.75713	1	13	14743	83	76974	8	5
GO:0006541	glutamine metabolic process	biological_process	0.75861	1	17	14743	100	76974	8	9
GO:0009967	positive regulation of signal transduction	biological_process	0.75862	1	9	14743	56	76974	8	1
GO:0010647	positive regulation of cell communication	biological_process	0.75862	1	9	14743	56	76974	8	1
GO:0023056	positive regulation of signaling	biological_process	0.75862	1	9	14743	56	76974	8	1
GO:0003954	NADH dehydrogenase activity	molecular_function	0.78475	1	12	14743	80	76974	8	4
GO:0015740	C4-dicarboxylate transport	biological_process	0.79665	1	18	14743	116	76974	8	10
GO:0007031	peroxisome organization	biological_process	0.81281	1	9	14743	66	76974	8	1
GO:0019069	viral capsid assembly	biological_process	0.82338	1	16	14743	99	76974	8	8
GO:0072686	mitotic spindle	cellular_component	0.84034	1	12	14743	79	76974	8	4
GO:1902495	transmembrane transporter complex	cellular_component	0.84587	1	11	14743	78	76974	8	3
GO:1990351	transporter complex	cellular_component	0.84587	1	11	14743	78	76974	8	3
GO:0070469	respiratory chain	cellular_component	0.85695	1	12	14743	88	76974	8	4
GO:0048584	positive regulation of response to stimulus	biological_process	0.8618	1	9	14743	63	76974	8	1
GO:0045893	positive regulation of transcription, DNA-templated	biological_process	0.87514	1	13	14743	87	76974	8	5
GO:1903508	positive regulation of nucleic acid-templated transcription	biological_process	0.87514	1	13	14743	87	76974	8	5
GO:0033647	host intracellular organelle	cellular_component	0.89426	1	14	14743	98	76974	8	6
GO:0033648	host intracellular membrane-bounded organelle	cellular_component	0.89426	1	14	14743	98	76974	8	6
GO:1990542	mitochondrial transmembrane transport	biological_process	0.90428	1	9	14743	66	76974	8	1
GO:0004813	alanine-tRNA ligase activity	molecular_function	0.90953	1	10	14743	70	76974	8	2
GO:0006419	alanyl-tRNA aminoacylation	biological_process	0.90953	1	10	14743	70	76974	8	2
GO:0019068	virion assembly	biological_process	0.91959	1	17	14743	116	76974	8	9
GO:0019748	secondary metabolic process	biological_process	0.92078	1	12	14743	85	76974	8	4
GO:0015294	solute:cation symporter activity	molecular_function	0.92167	1	12	14743	87	76974	8	4
GO:0045935	positive regulation of nucleobase-containing compound metabolic process	biological_process	0.93013	1	13	14743	94	76974	8	5
GO:0051254	positive regulation of RNA metabolic process	biological_process	0.93013	1	13	14743	94	76974	8	5
GO:1902680	positive regulation of RNA biosynthetic process	biological_process	0.93013	1	13	14743	94	76974	8	5
GO:0004866	endopeptidase inhibitor activity	molecular_function	0.94858	1	9	14743	79	76974	8	1
GO:0061135	endopeptidase regulator activity	molecular_function	0.94858	1	9	14743	79	76974	8	1
GO:0015293	symporter activity	molecular_function	0.9559	1	12	14743	93	76974	8	4
GO:0006383	transcription from RNA polymerase III promoter	biological_process	0.95927	1	15	14743	121	76974	8	7
GO:0048468	cell development	biological_process	0.96586	1	9	14743	81	76974	8	1
GO:0006839	mitochondrial transport	biological_process	0.96644	1	11	14743	91	76974	8	3
GO:0008948	oxaloacetate decarboxylase activity	molecular_function	0.96882	1	11	14743	101	76974	8	3
GO:0035725	sodium ion transmembrane transport	biological_process	0.96882	1	11	14743	101	76974	8	3
GO:0071436	sodium ion export	biological_process	0.96882	1	11	14743	101	76974	8	3
GO:0005985	sucrose metabolic process	biological_process	0.97191	1	16	14743	118	76974	8	8
GO:0051726	regulation of cell cycle	biological_process	0.99361	1	24	14743	196	76974	8	16
GO:0005643	nuclear pore	cellular_component	0.99713	1	10	14743	99	76974	8	2
GO:0005635	nuclear envelope	cellular_component	0.9996	1	10	14743	114	76974	8	2
GO:0004557	alpha-galactosidase activity	molecular_function	0.012558	0.27948	11	14743	28	76974	7	4
GO:0044461	bacterial-type flagellum part	cellular_component	0.014475	0.29554	11	14743	30	76974	7	4
GO:0004017	adenylate kinase activity	molecular_function	0.014653	0.29741	13	14743	37	76974	7	6
GO:0015159	polysaccharide transmembrane transporter activity	molecular_function	0.017859	0.32107	9	14743	25	76974	7	2
GO:0015774	polysaccharide transport	biological_process	0.022909	0.37484	9	14743	26	76974	7	2
GO:0033037	polysaccharide localization	biological_process	0.022909	0.37484	9	14743	26	76974	7	2
GO:0044463	cell projection part	cellular_component	0.027194	0.41598	11	14743	33	76974	7	4
GO:0006558	L-phenylalanine metabolic process	biological_process	0.079393	0.84701	10	14743	32	76974	7	3
GO:1902221	erythrose 4-phosphate/phosphoenolpyruvate family amino acid metabolic process	biological_process	0.079393	0.84701	10	14743	32	76974	7	3
GO:0051015	actin filament binding	molecular_function	0.10983	1	9	14743	30	76974	7	2
GO:0035064	methylated histone binding	molecular_function	0.12338	1	8	14743	26	76974	7	1
GO:0006537	glutamate biosynthetic process	biological_process	0.12435	1	19	14743	76	76974	7	12
GO:0043650	dicarboxylic acid biosynthetic process	biological_process	0.12435	1	19	14743	76	76974	7	12
GO:0033202	DNA helicase complex	cellular_component	0.13022	1	10	14743	35	76974	7	3
GO:0015930	glutamate synthase activity	molecular_function	0.13751	1	19	14743	77	76974	7	12
GO:0016049	cell growth	biological_process	0.15977	1	9	14743	32	76974	7	2
GO:0019064	fusion of virus membrane with host plasma membrane	biological_process	0.17564	1	11	14743	42	76974	7	4
GO:0039663	membrane fusion involved in viral entry into host cell	biological_process	0.17564	1	11	14743	42	76974	7	4
GO:0044800	multi-organism membrane fusion	biological_process	0.17564	1	11	14743	42	76974	7	4
GO:0044803	multi-organism membrane organization	biological_process	0.17564	1	11	14743	42	76974	7	4
GO:0051205	protein insertion into membrane	biological_process	0.24436	1	11	14743	46	76974	7	4
GO:0008661	1-deoxy-D-xylulose-5-phosphate synthase activity	molecular_function	0.25203	1	13	14743	54	76974	7	6
GO:0016744	transferase activity, transferring aldehyde or ketonic groups	molecular_function	0.25203	1	13	14743	54	76974	7	6
GO:0050792	regulation of viral process	biological_process	0.25838	1	11	14743	45	76974	7	4
GO:0000184	nuclear-transcribed mRNA catabolic process, nonsense-mediated decay	biological_process	0.29036	1	11	14743	46	76974	7	4
GO:0016855	racemase and epimerase activity, acting on amino acids and derivatives	molecular_function	0.29415	1	10	14743	42	76974	7	3
GO:0036361	racemase activity, acting on amino acids and derivatives	molecular_function	0.29415	1	10	14743	42	76974	7	3
GO:0040007	growth	biological_process	0.29427	1	11	14743	47	76974	7	4
GO:0004096	catalase activity	molecular_function	0.30395	1	11	14743	47	76974	7	4
GO:0030260	entry into host cell	biological_process	0.32169	1	11	14743	48	76974	7	4
GO:0044409	entry into host	biological_process	0.32169	1	11	14743	48	76974	7	4
GO:0046718	viral entry into host cell	biological_process	0.32169	1	11	14743	48	76974	7	4
GO:0051806	entry into cell of other organism involved in symbiotic interaction	biological_process	0.32169	1	11	14743	48	76974	7	4
GO:0051828	entry into other organism involved in symbiotic interaction	biological_process	0.32169	1	11	14743	48	76974	7	4
GO:0003918	DNA topoisomerase type II (ATP-hydrolyzing) activity	molecular_function	0.34	1	9	14743	39	76974	7	2
GO:0061505	DNA topoisomerase II activity	molecular_function	0.34	1	9	14743	39	76974	7	2
GO:0008176	tRNA (guanine-N7-)-methyltransferase activity	molecular_function	0.39191	1	14	14743	66	76974	7	7
GO:0000774	adenyl-nucleotide exchange factor activity	molecular_function	0.4264	1	15	14743	74	76974	7	8
GO:0004665	prephenate dehydrogenase (NADP+) activity	molecular_function	0.45576	1	7	14743	33	76974	7	0
GO:0006571	tyrosine biosynthetic process	biological_process	0.45576	1	7	14743	33	76974	7	0
GO:0008977	prephenate dehydrogenase activity	molecular_function	0.45576	1	7	14743	33	76974	7	0
GO:0009069	serine family amino acid metabolic process	biological_process	0.47743	1	14	14743	68	76974	7	7
GO:0016725	oxidoreductase activity, acting on CH or CH2 groups	molecular_function	0.50567	1	12	14743	60	76974	7	5
GO:0000159	protein phosphatase type 2A complex	cellular_component	0.54128	1	11	14743	55	76974	7	4
GO:0072525	pyridine-containing compound biosynthetic process	biological_process	0.57521	1	10	14743	52	76974	7	3
GO:0009507	chloroplast	cellular_component	0.57841	1	17	14743	103	76974	7	10
GO:0009536	plastid	cellular_component	0.57841	1	17	14743	103	76974	7	10
GO:0051607	defense response to virus	biological_process	0.60484	1	12	14743	65	76974	7	5
GO:0004571	mannosyl-oligosaccharide 1,2-alpha-mannosidase activity	molecular_function	0.61494	1	12	14743	63	76974	7	5
GO:0015924	mannosyl-oligosaccharide mannosidase activity	molecular_function	0.61494	1	12	14743	63	76974	7	5
GO:0000288	nuclear-transcribed mRNA catabolic process, deadenylation-dependent decay	biological_process	0.61497	1	9	14743	51	76974	7	2
GO:0002252	immune effector process	biological_process	0.62839	1	12	14743	66	76974	7	5
GO:0051260	protein homooligomerization	biological_process	0.63757	1	7	14743	38	76974	7	0
GO:0043244	regulation of protein complex disassembly	biological_process	0.64438	1	11	14743	64	76974	7	4
GO:0030182	neuron differentiation	biological_process	0.64679	1	9	14743	55	76974	7	2
GO:0048699	generation of neurons	biological_process	0.64679	1	9	14743	55	76974	7	2
GO:0031175	neuron projection development	biological_process	0.65986	1	8	14743	50	76974	7	1
GO:0048666	neuron development	biological_process	0.65986	1	8	14743	50	76974	7	1
GO:0052126	movement in host environment	biological_process	0.66859	1	11	14743	62	76974	7	4
GO:0052192	movement in environment of other organism involved in symbiotic interaction	biological_process	0.66859	1	11	14743	62	76974	7	4
GO:0022008	neurogenesis	biological_process	0.67202	1	9	14743	56	76974	7	2
GO:0007399	nervous system development	biological_process	0.69582	1	9	14743	57	76974	7	2
GO:0005402	cation:sugar symporter activity	molecular_function	0.70031	1	10	14743	58	76974	7	3
GO:0009307	DNA restriction-modification system	biological_process	0.72293	1	8	14743	49	76974	7	1
GO:0044355	clearance of foreign intracellular DNA	biological_process	0.72293	1	8	14743	49	76974	7	1
GO:0004089	carbonate dehydratase activity	molecular_function	0.73481	1	9	14743	57	76974	7	2
GO:0006771	riboflavin metabolic process	biological_process	0.74296	1	11	14743	67	76974	7	4
GO:0009231	riboflavin biosynthetic process	biological_process	0.74296	1	11	14743	67	76974	7	4
GO:0042726	flavin-containing compound metabolic process	biological_process	0.74296	1	11	14743	67	76974	7	4
GO:0042727	flavin-containing compound biosynthetic process	biological_process	0.74296	1	11	14743	67	76974	7	4
GO:0051119	sugar transmembrane transporter activity	molecular_function	0.75282	1	10	14743	61	76974	7	3
GO:0015743	malate transport	biological_process	0.76291	1	15	14743	92	76974	7	8
GO:0002682	regulation of immune system process	biological_process	0.81229	1	9	14743	61	76974	7	2
GO:0005669	transcription factor TFIID complex	cellular_component	0.82511	1	11	14743	73	76974	7	4
GO:2001070	starch binding	molecular_function	0.82845	1	12	14743	77	76974	7	5
GO:0016247	channel regulator activity	molecular_function	0.83663	1	8	14743	55	76974	7	1
GO:0009306	protein secretion	biological_process	0.84143	1	13	14743	89	76974	7	6
GO:0005351	sugar:proton symporter activity	molecular_function	0.8544	1	8	14743	55	76974	7	1
GO:0015295	solute:proton symporter activity	molecular_function	0.8544	1	8	14743	55	76974	7	1
GO:0004356	glutamate-ammonia ligase activity	molecular_function	0.88073	1	8	14743	57	76974	7	1
GO:0042025	host cell nucleus	cellular_component	0.88605	1	13	14743	91	76974	7	6
GO:0006040	amino sugar metabolic process	biological_process	0.88918	1	12	14743	86	76974	7	5
GO:0016211	ammonia ligase activity	molecular_function	0.89247	1	8	14743	58	76974	7	1
GO:0016880	acid-ammonia (or amide) ligase activity	molecular_function	0.89247	1	8	14743	58	76974	7	1
GO:0072527	pyrimidine-containing compound metabolic process	biological_process	0.91103	1	17	14743	118	76974	7	10
GO:0043086	negative regulation of catalytic activity	biological_process	0.9197	1	13	14743	96	76974	7	6
GO:0044092	negative regulation of molecular function	biological_process	0.9197	1	13	14743	96	76974	7	6
GO:0019900	kinase binding	molecular_function	0.93146	1	15	14743	107	76974	7	8
GO:0051235	maintenance of location	biological_process	0.9389	1	10	14743	77	76974	7	3
GO:0019901	protein kinase binding	molecular_function	0.94747	1	14	14743	104	76974	7	7
GO:0030162	regulation of proteolysis	biological_process	0.94955	1	12	14743	91	76974	7	5
GO:0006626	protein targeting to mitochondrion	biological_process	0.96279	1	9	14743	76	76974	7	2
GO:0044702	single organism reproductive process	biological_process	0.96872	1	12	14743	98	76974	7	5
GO:0070585	protein localization to mitochondrion	biological_process	0.97004	1	9	14743	78	76974	7	2
GO:0072655	establishment of protein localization to mitochondrion	biological_process	0.97004	1	9	14743	78	76974	7	2
GO:0019953	sexual reproduction	biological_process	0.97597	1	13	14743	107	76974	7	6
GO:0016860	intramolecular oxidoreductase activity	molecular_function	0.9879	1	11	14743	102	76974	7	4
GO:0006368	transcription elongation from RNA polymerase II promoter	biological_process	0.99341	1	10	14743	97	76974	7	3
GO:0003968	RNA-directed RNA polymerase activity	molecular_function	0.99342	1	16	14743	136	76974	7	9
GO:0006354	DNA-templated transcription, elongation	biological_process	0.99553	1	10	14743	100	76974	7	3
GO:0003879	ATP phosphoribosyltransferase activity	molecular_function	0.000139	0.00896	10	14743	16	76974	6	4
GO:0046685	response to arsenic-containing substance	biological_process	0.000408	0.021063	19	14743	45	76974	6	13
GO:0006432	phenylalanyl-tRNA aminoacylation	biological_process	0.00083	0.037137	10	14743	18	76974	6	4
GO:0046537	2,3-bisphosphoglycerate-independent phosphoglycerate mutase activity	molecular_function	0.020732	0.35046	8	14743	21	76974	6	2
GO:0008649	rRNA methyltransferase activity	molecular_function	0.021266	0.35601	12	14743	34	76974	6	6
GO:0004743	pyruvate kinase activity	molecular_function	0.033512	0.47979	20	14743	67	76974	6	14
GO:0019385	methanogenesis, from acetate	biological_process	0.072083	0.79461	9	14743	27	76974	6	3
GO:0004832	valine-tRNA ligase activity	molecular_function	0.075828	0.81712	7	14743	20	76974	6	1
GO:0006438	valyl-tRNA aminoacylation	biological_process	0.075828	0.81712	7	14743	20	76974	6	1
GO:0031503	protein complex localization	biological_process	0.087906	0.90133	7	14743	21	76974	6	1
GO:0034629	cellular protein complex localization	biological_process	0.087906	0.90133	7	14743	21	76974	6	1
GO:0003917	DNA topoisomerase type I activity	molecular_function	0.096682	0.95987	10	14743	33	76974	6	4
GO:0031124	mRNA 3'-end processing	biological_process	0.12698	1	9	14743	32	76974	6	3
GO:0048309	endoplasmic reticulum inheritance	biological_process	0.14822	1	10	14743	36	76974	6	4
GO:0007129	synapsis	biological_process	0.15261	1	7	14743	24	76974	6	1
GO:0007130	synaptonemal complex assembly	biological_process	0.15261	1	7	14743	24	76974	6	1
GO:0045143	homologous chromosome segregation	biological_process	0.15261	1	7	14743	24	76974	6	1
GO:0070192	chromosome organization involved in meiosis	biological_process	0.15261	1	7	14743	24	76974	6	1
GO:0070193	synaptonemal complex organization	biological_process	0.15261	1	7	14743	24	76974	6	1
GO:0008107	galactoside 2-alpha-L-fucosyltransferase activity	molecular_function	0.18028	1	8	14743	28	76974	6	2
GO:0031127	alpha-(1,2)-fucosyltransferase activity	molecular_function	0.18028	1	8	14743	28	76974	6	2
GO:0048308	organelle inheritance	biological_process	0.19352	1	10	14743	38	76974	6	4
GO:0051090	regulation of sequence-specific DNA binding transcription factor activity	biological_process	0.19632	1	8	14743	29	76974	6	2
GO:0031011	Ino80 complex	cellular_component	0.19939	1	8	14743	29	76974	6	2
GO:0097346	INO80-type complex	cellular_component	0.19939	1	8	14743	29	76974	6	2
GO:0046782	regulation of viral transcription	biological_process	0.20359	1	10	14743	38	76974	6	4
GO:1903900	regulation of viral life cycle	biological_process	0.20359	1	10	14743	38	76974	6	4
GO:0031123	RNA 3'-end processing	biological_process	0.2184	1	9	14743	36	76974	6	3
GO:0070070	proton-transporting V-type ATPase complex assembly	biological_process	0.23019	1	6	14743	24	76974	6	0
GO:0070072	vacuolar proton-transporting V-type ATPase complex assembly	biological_process	0.23019	1	6	14743	24	76974	6	0
GO:0008837	diaminopimelate epimerase activity	molecular_function	0.30172	1	8	14743	33	76974	6	2
GO:0047661	amino-acid racemase activity	molecular_function	0.30172	1	8	14743	33	76974	6	2
GO:0045132	meiotic chromosome segregation	biological_process	0.30791	1	7	14743	29	76974	6	1
GO:0000097	sulfur amino acid biosynthetic process	biological_process	0.31611	1	11	14743	47	76974	6	5
GO:0000245	spliceosomal complex assembly	biological_process	0.31923	1	7	14743	29	76974	6	1
GO:0005685	U1 snRNP	cellular_component	0.31923	1	7	14743	29	76974	6	1
GO:0006376	mRNA splice site selection	biological_process	0.31923	1	7	14743	29	76974	6	1
GO:0030532	small nuclear ribonucleoprotein complex	cellular_component	0.31923	1	7	14743	29	76974	6	1
GO:0097525	spliceosomal snRNP complex	cellular_component	0.31923	1	7	14743	29	76974	6	1
GO:0009074	aromatic amino acid family catabolic process	biological_process	0.32064	1	6	14743	25	76974	6	0
GO:0015098	molybdate ion transmembrane transporter activity	molecular_function	0.32236	1	12	14743	52	76974	6	6
GO:0015689	molybdate ion transport	biological_process	0.32236	1	12	14743	52	76974	6	6
GO:0019843	rRNA binding	molecular_function	0.32341	1	13	14743	65	76974	6	7
GO:0005126	cytokine receptor binding	molecular_function	0.32718	1	14	14743	63	76974	6	8
GO:0070071	proton-transporting two-sector ATPase complex assembly	biological_process	0.33026	1	6	14743	27	76974	6	0
GO:0004869	cysteine-type endopeptidase inhibitor activity	molecular_function	0.33837	1	7	14743	33	76974	6	1
GO:0044815	DNA packaging complex	cellular_component	0.34454	1	10	14743	46	76974	6	4
GO:0002161	aminoacyl-tRNA editing activity	molecular_function	0.34709	1	9	14743	39	76974	6	3
GO:0032270	positive regulation of cellular protein metabolic process	biological_process	0.37997	1	8	14743	38	76974	6	2
GO:0051247	positive regulation of protein metabolic process	biological_process	0.37997	1	8	14743	38	76974	6	2
GO:0016843	amine-lyase activity	molecular_function	0.38029	1	8	14743	37	76974	6	2
GO:0016844	strictosidine synthase activity	molecular_function	0.38029	1	8	14743	37	76974	6	2
GO:0008250	oligosaccharyltransferase complex	cellular_component	0.44875	1	7	14743	33	76974	6	1
GO:0070603	SWI/SNF superfamily-type complex	cellular_component	0.45038	1	8	14743	39	76974	6	2
GO:0000372	Group I intron splicing	biological_process	0.46058	1	8	14743	37	76974	6	2
GO:0000376	RNA splicing, via transesterification reactions with guanosine as nucleophile	biological_process	0.46058	1	8	14743	37	76974	6	2
GO:0016929	SUMO-specific protease activity	molecular_function	0.49726	1	8	14743	39	76974	6	2
GO:0032183	SUMO binding	molecular_function	0.49726	1	8	14743	39	76974	6	2
GO:0070122	isopeptidase activity	molecular_function	0.49726	1	8	14743	39	76974	6	2
GO:0070138	ubiquitin-like protein-specific isopeptidase activity	molecular_function	0.49726	1	8	14743	39	76974	6	2
GO:0070140	SUMO-specific isopeptidase activity	molecular_function	0.49726	1	8	14743	39	76974	6	2
GO:0016703	oxidoreductase activity, acting on single donors with incorporation of molecular oxygen, incorporation of one atom of oxygen (internal monooxygenases or internal mixed function oxidases)	molecular_function	0.51625	1	17	14743	88	76974	6	11
GO:0022618	ribonucleoprotein complex assembly	biological_process	0.52634	1	7	14743	36	76974	6	1
GO:0007409	axonogenesis	biological_process	0.55412	1	6	14743	36	76974	6	0
GO:0007411	axon guidance	biological_process	0.55412	1	6	14743	36	76974	6	0
GO:0048667	cell morphogenesis involved in neuron differentiation	biological_process	0.55412	1	6	14743	36	76974	6	0
GO:0048812	neuron projection morphogenesis	biological_process	0.55412	1	6	14743	36	76974	6	0
GO:0061564	axon development	biological_process	0.55412	1	6	14743	36	76974	6	0
GO:0097485	neuron projection guidance	biological_process	0.55412	1	6	14743	36	76974	6	0
GO:0000096	sulfur amino acid metabolic process	biological_process	0.56607	1	13	14743	67	76974	6	7
GO:0070009	serine-type aminopeptidase activity	molecular_function	0.56641	1	13	14743	67	76974	6	7
GO:0000289	nuclear-transcribed mRNA poly(A) tail shortening	biological_process	0.5698	1	8	14743	44	76974	6	2
GO:0005786	signal recognition particle, endoplasmic reticulum targeting	cellular_component	0.60213	1	6	14743	34	76974	6	0
GO:0030942	endoplasmic reticulum signal peptide binding	molecular_function	0.60213	1	6	14743	34	76974	6	0
GO:0004176	ATP-dependent peptidase activity	molecular_function	0.60328	1	8	14743	42	76974	6	2
GO:0019087	transformation of host cell by virus	biological_process	0.60743	1	8	14743	44	76974	6	2
GO:0008053	mitochondrial fusion	biological_process	0.61031	1	12	14743	67	76974	6	6
GO:0016226	iron-sulfur cluster assembly	biological_process	0.62162	1	13	14743	75	76974	6	7
GO:0031163	metallo-sulfur cluster assembly	biological_process	0.62162	1	13	14743	75	76974	6	7
GO:0000904	cell morphogenesis involved in differentiation	biological_process	0.62209	1	6	14743	38	76974	6	0
GO:0034457	Mpp10 complex	cellular_component	0.63394	1	7	14743	39	76974	6	1
GO:0032269	negative regulation of cellular protein metabolic process	biological_process	0.63556	1	17	14743	94	76974	6	11
GO:0051248	negative regulation of protein metabolic process	biological_process	0.63556	1	17	14743	94	76974	6	11
GO:0008239	dipeptidyl-peptidase activity	molecular_function	0.65596	1	13	14743	71	76974	6	7
GO:0003747	translation release factor activity	molecular_function	0.66382	1	12	14743	67	76974	6	6
GO:0008079	translation termination factor activity	molecular_function	0.66382	1	12	14743	67	76974	6	6
GO:1901617	organic hydroxy compound biosynthetic process	biological_process	0.68881	1	14	14743	79	76974	6	8
GO:0071310	cellular response to organic substance	biological_process	0.69519	1	9	14743	53	76974	6	3
GO:0030686	90S preribosome	cellular_component	0.71114	1	7	14743	42	76974	6	1
GO:0032990	cell part morphogenesis	biological_process	0.71433	1	6	14743	42	76974	6	0
GO:0048858	cell projection morphogenesis	biological_process	0.71433	1	6	14743	42	76974	6	0
GO:0005732	small nucleolar ribonucleoprotein complex	cellular_component	0.72914	1	7	14743	43	76974	6	1
GO:0009401	phosphoenolpyruvate-dependent sugar phosphotransferase system	biological_process	0.73511	1	12	14743	78	76974	6	6
GO:0009036	Type II site-specific deoxyribonuclease activity	molecular_function	0.74104	1	7	14743	44	76974	6	1
GO:0015666	restriction endodeoxyribonuclease activity	molecular_function	0.74104	1	7	14743	44	76974	6	1
GO:0043248	proteasome assembly	biological_process	0.78567	1	14	14743	85	76974	6	8
GO:0009289	pilus	cellular_component	0.80519	1	6	14743	39	76974	6	0
GO:0071826	ribonucleoprotein complex subunit organization	biological_process	0.80999	1	7	14743	47	76974	6	1
GO:0016814	hydrolase activity, acting on carbon-nitrogen (but not peptide) bonds, in cyclic amidines	molecular_function	0.81375	1	11	14743	71	76974	6	5
GO:0044452	nucleolar part	cellular_component	0.83256	1	7	14743	52	76974	6	1
GO:0042600	chorion	cellular_component	0.83793	1	7	14743	49	76974	6	1
GO:0016755	transferase activity, transferring amino-acyl groups	molecular_function	0.849	1	9	14743	61	76974	6	3
GO:0016782	transferase activity, transferring sulfur-containing groups	molecular_function	0.84903	1	14	14743	95	76974	6	8
GO:0016892	endoribonuclease activity, producing 3'-phosphomonoesters	molecular_function	0.86212	1	6	14743	45	76974	6	0
GO:0016894	endonuclease activity, active with either ribo- or deoxyribonucleic acids and producing 3'-phosphomonoesters	molecular_function	0.86212	1	6	14743	45	76974	6	0
GO:0009617	response to bacterium	biological_process	0.86718	1	7	14743	54	76974	6	1
GO:0042742	defense response to bacterium	biological_process	0.86718	1	7	14743	54	76974	6	1
GO:0032507	maintenance of protein location in cell	biological_process	0.86802	1	9	14743	63	76974	6	3
GO:0045185	maintenance of protein location	biological_process	0.86802	1	9	14743	63	76974	6	3
GO:0051651	maintenance of location in cell	biological_process	0.86802	1	9	14743	63	76974	6	3
GO:0007008	outer mitochondrial membrane organization	biological_process	0.89343	1	6	14743	45	76974	6	0
GO:0045040	protein import into mitochondrial outer membrane	biological_process	0.89343	1	6	14743	45	76974	6	0
GO:0090151	establishment of protein localization to mitochondrial membrane	biological_process	0.89343	1	6	14743	45	76974	6	0
GO:0004576	oligosaccharyl transferase activity	molecular_function	0.90885	1	9	14743	67	76974	6	3
GO:0007034	vacuolar transport	biological_process	0.93965	1	9	14743	73	76974	6	3
GO:0005746	mitochondrial respiratory chain	cellular_component	0.94151	1	8	14743	72	76974	6	2
GO:0005179	hormone activity	molecular_function	0.95315	1	13	14743	97	76974	6	7
GO:0031399	regulation of protein modification process	biological_process	0.95466	1	15	14743	114	76974	6	9
GO:0016861	intramolecular oxidoreductase activity, interconverting aldoses and ketoses	molecular_function	0.96415	1	10	14743	84	76974	6	4
GO:0051302	regulation of cell division	biological_process	0.96639	1	13	14743	102	76974	6	7
GO:0042180	cellular ketone metabolic process	biological_process	0.96926	1	7	14743	64	76974	6	1
GO:0015932	nucleobase-containing compound transmembrane transporter activity	molecular_function	0.9967	1	13	14743	135	76974	6	7
GO:0030119	AP-type membrane coat adaptor complex	cellular_component	0.99825	1	10	14743	120	76974	6	4
GO:0044413	avoidance of host defenses	biological_process	1	1	7	14743	169	76974	6	1
GO:0044415	evasion or tolerance of host defenses	biological_process	1	1	7	14743	169	76974	6	1
GO:0051832	avoidance of defenses of other organism involved in symbiotic interaction	biological_process	1	1	7	14743	169	76974	6	1
GO:0051834	evasion or tolerance of defenses of other organism involved in symbiotic interaction	biological_process	1	1	7	14743	169	76974	6	1
GO:0052173	response to defenses of other organism involved in symbiotic interaction	biological_process	1	1	7	14743	169	76974	6	1
GO:0052200	response to host defenses	biological_process	1	1	7	14743	169	76974	6	1
GO:0075136	response to host	biological_process	1	1	7	14743	169	76974	6	1
GO:0006729	tetrahydrobiopterin biosynthetic process	biological_process	0.001974	0.071299	6	14743	10	76974	5	1
GO:0008124	4-alpha-hydroxytetrahydrobiopterin dehydratase activity	molecular_function	0.001974	0.071299	6	14743	10	76974	5	1
GO:0046146	tetrahydrobiopterin metabolic process	biological_process	0.001974	0.071299	6	14743	10	76974	5	1
GO:0045300	acyl-[acyl-carrier-protein] desaturase activity	molecular_function	0.006168	0.16646	10	14743	23	76974	5	5
GO:0007423	sensory organ development	biological_process	0.006596	0.17501	7	14743	13	76974	5	2
GO:0003880	protein C-terminal carboxyl O-methyltransferase activity	molecular_function	0.013517	0.28462	8	14743	19	76974	5	3
GO:0004671	protein C-terminal S-isoprenylcysteine carboxyl O-methyltransferase activity	molecular_function	0.013517	0.28462	8	14743	19	76974	5	3
GO:0006481	C-terminal protein methylation	biological_process	0.013517	0.28462	8	14743	19	76974	5	3
GO:0010340	carboxyl-O-methyltransferase activity	molecular_function	0.013517	0.28462	8	14743	19	76974	5	3
GO:0018410	C-terminal protein amino acid modification	biological_process	0.013517	0.28462	8	14743	19	76974	5	3
GO:0043687	post-translational protein modification	biological_process	0.013517	0.28462	8	14743	19	76974	5	3
GO:0051998	protein carboxyl O-methyltransferase activity	molecular_function	0.013517	0.28462	8	14743	19	76974	5	3
GO:0003847	1-alkyl-2-acetylglycerophosphocholine esterase activity	molecular_function	0.014039	0.28915	7	14743	15	76974	5	2
GO:0006515	misfolded or incompletely synthesized protein catabolic process	biological_process	0.024719	0.38694	6	14743	13	76974	5	1
GO:0031144	proteasome localization	biological_process	0.024719	0.38694	6	14743	13	76974	5	1
GO:0035966	response to topologically incorrect protein	biological_process	0.024719	0.38694	6	14743	13	76974	5	1
GO:0035967	cellular response to topologically incorrect protein	biological_process	0.024719	0.38694	6	14743	13	76974	5	1
GO:0051788	response to misfolded protein	biological_process	0.024719	0.38694	6	14743	13	76974	5	1
GO:0071218	cellular response to misfolded protein	biological_process	0.024719	0.38694	6	14743	13	76974	5	1
GO:0071630	nucleus-associated proteasomal ubiquitin-dependent protein catabolic process	biological_process	0.024719	0.38694	6	14743	13	76974	5	1
GO:0008830	dTDP-4-dehydrorhamnose 3,5-epimerase activity	molecular_function	0.04337	0.55952	6	14743	14	76974	5	1
GO:0015018	galactosylgalactosylxylosylprotein 3-beta-glucuronosyltransferase activity	molecular_function	0.046916	0.58515	7	14743	18	76974	5	2
GO:0015020	glucuronosyltransferase activity	molecular_function	0.046916	0.58515	7	14743	18	76974	5	2
GO:0006480	N-terminal protein amino acid methylation	biological_process	0.05005	0.6089	9	14743	28	76974	5	4
GO:0031365	N-terminal protein amino acid modification	biological_process	0.05005	0.6089	9	14743	28	76974	5	4
GO:0050664	oxidoreductase activity, acting on NAD(P)H, oxygen as acceptor	molecular_function	0.05787	0.68085	6	14743	15	76974	5	1
GO:0046789	host cell surface receptor binding	molecular_function	0.070038	0.78451	7	14743	20	76974	5	2
GO:0004864	protein phosphatase inhibitor activity	molecular_function	0.074599	0.8128	8	14743	24	76974	5	3
GO:0019212	phosphatase inhibitor activity	molecular_function	0.074599	0.8128	8	14743	24	76974	5	3
GO:0046812	host cell surface binding	molecular_function	0.089133	0.90993	7	14743	21	76974	5	2
GO:0004411	homogentisate 1,2-dioxygenase activity	molecular_function	0.09284	0.93357	5	14743	13	76974	5	0
GO:0006559	L-phenylalanine catabolic process	biological_process	0.09284	0.93357	5	14743	13	76974	5	0
GO:1902222	erythrose 4-phosphate/phosphoenolpyruvate family amino acid catabolic process	biological_process	0.09284	0.93357	5	14743	13	76974	5	0
GO:0048513	organ development	biological_process	0.10135	0.98634	9	14743	29	76974	5	4
GO:0004556	alpha-amylase activity	molecular_function	0.11781	1	7	14743	22	76974	5	2
GO:0071203	WASH complex	cellular_component	0.1347	1	10	14743	36	76974	5	5
GO:0007219	Notch signaling pathway	biological_process	0.1567	1	7	14743	24	76974	5	2
GO:0008883	glutamyl-tRNA reductase activity	molecular_function	0.20483	1	5	14743	17	76974	5	0
GO:0019236	response to pheromone	biological_process	0.21901	1	11	14743	44	76974	5	6
GO:0004620	phospholipase activity	molecular_function	0.21942	1	9	14743	35	76974	5	4
GO:0016055	Wnt signaling pathway	biological_process	0.22559	1	6	14743	22	76974	5	1
GO:0043281	regulation of cysteine-type endopeptidase activity involved in apoptotic process	biological_process	0.23863	1	6	14743	22	76974	5	1
GO:2000116	regulation of cysteine-type endopeptidase activity	biological_process	0.23863	1	6	14743	22	76974	5	1
GO:0034227	tRNA thio-modification	biological_process	0.23971	1	6	14743	23	76974	5	1
GO:0004602	glutathione peroxidase activity	molecular_function	0.29021	1	9	14743	40	76974	5	4
GO:0009877	nodulation	biological_process	0.30301	1	14	14743	65	76974	5	9
GO:0008964	phosphoenolpyruvate carboxylase activity	molecular_function	0.36069	1	10	14743	44	76974	5	5
GO:0019082	viral protein processing	biological_process	0.36388	1	7	14743	30	76974	5	2
GO:0004064	arylesterase activity	molecular_function	0.38042	1	7	14743	31	76974	5	2
GO:0033588	Elongator holoenzyme complex	cellular_component	0.38711	1	12	14743	56	76974	5	7
GO:0015977	carbon fixation	biological_process	0.38996	1	10	14743	45	76974	5	5
GO:0052547	regulation of peptidase activity	biological_process	0.39119	1	6	14743	26	76974	5	1
GO:0052548	regulation of endopeptidase activity	biological_process	0.39119	1	6	14743	26	76974	5	1
GO:0044769	ATPase activity, coupled to transmembrane movement of ions, rotational mechanism	molecular_function	0.45909	1	10	14743	51	76974	5	5
GO:0006188	IMP biosynthetic process	biological_process	0.48177	1	6	14743	30	76974	5	1
GO:0046040	IMP metabolic process	biological_process	0.48177	1	6	14743	30	76974	5	1
GO:0019359	nicotinamide nucleotide biosynthetic process	biological_process	0.48586	1	7	14743	33	76974	5	2
GO:0000786	nucleosome	cellular_component	0.48958	1	8	14743	41	76974	5	3
GO:0032993	protein-DNA complex	cellular_component	0.48958	1	8	14743	41	76974	5	3
GO:0019321	pentose metabolic process	biological_process	0.49378	1	6	14743	29	76974	5	1
GO:0019566	arabinose metabolic process	biological_process	0.49378	1	6	14743	29	76974	5	1
GO:0046373	L-arabinose metabolic process	biological_process	0.49378	1	6	14743	29	76974	5	1
GO:0006284	base-excision repair	biological_process	0.50602	1	10	14743	51	76974	5	5
GO:0070461	SAGA-type complex	cellular_component	0.50765	1	8	14743	39	76974	5	3
GO:0019363	pyridine nucleotide biosynthetic process	biological_process	0.51955	1	7	14743	34	76974	5	2
GO:0044093	positive regulation of molecular function	biological_process	0.52837	1	5	14743	24	76974	5	0
GO:0018580	nitronate monooxygenase activity	molecular_function	0.52841	1	13	14743	68	76974	5	8
GO:0006801	superoxide metabolic process	biological_process	0.54017	1	8	14743	48	76974	5	3
GO:0072593	reactive oxygen species metabolic process	biological_process	0.54017	1	8	14743	48	76974	5	3
GO:0050793	regulation of developmental process	biological_process	0.54104	1	14	14743	76	76974	5	9
GO:0009538	photosystem I reaction center	cellular_component	0.55863	1	6	14743	38	76974	5	1
GO:0006334	nucleosome assembly	biological_process	0.56452	1	9	14743	50	76974	5	4
GO:0031497	chromatin assembly	biological_process	0.56452	1	9	14743	50	76974	5	4
GO:0034728	nucleosome organization	biological_process	0.56452	1	9	14743	50	76974	5	4
GO:0004615	phosphomannomutase activity	molecular_function	0.57867	1	7	14743	37	76974	5	2
GO:0009226	nucleotide-sugar biosynthetic process	biological_process	0.57867	1	7	14743	37	76974	5	2
GO:0009298	GDP-mannose biosynthetic process	biological_process	0.57867	1	7	14743	37	76974	5	2
GO:0019673	GDP-mannose metabolic process	biological_process	0.57867	1	7	14743	37	76974	5	2
GO:0006544	glycine metabolic process	biological_process	0.58836	1	12	14743	62	76974	5	7
GO:0019829	cation-transporting ATPase activity	molecular_function	0.61509	1	10	14743	57	76974	5	5
GO:0042625	ATPase activity, coupled to transmembrane movement of ions	molecular_function	0.61509	1	10	14743	57	76974	5	5
GO:0043130	ubiquitin binding	molecular_function	0.61551	1	8	14743	45	76974	5	3
GO:0006476	protein deacetylation	biological_process	0.61926	1	9	14743	52	76974	5	4
GO:0035601	protein deacylation	biological_process	0.61926	1	9	14743	52	76974	5	4
GO:0098732	macromolecule deacylation	biological_process	0.61926	1	9	14743	52	76974	5	4
GO:0046556	alpha-L-arabinofuranosidase activity	molecular_function	0.62442	1	6	14743	33	76974	5	1
GO:0044781	bacterial-type flagellum organization	biological_process	0.63456	1	7	14743	39	76974	5	2
GO:0006333	chromatin assembly or disassembly	biological_process	0.6347	1	9	14743	53	76974	5	4
GO:0016972	thiol oxidase activity	molecular_function	0.6376	1	5	14743	28	76974	5	0
GO:0009225	nucleotide-sugar metabolic process	biological_process	0.6405	1	7	14743	39	76974	5	2
GO:1902533	positive regulation of intracellular signal transduction	biological_process	0.64737	1	5	14743	29	76974	5	0
GO:0051239	regulation of multicellular organismal process	biological_process	0.64751	1	10	14743	57	76974	5	5
GO:0003714	transcription corepressor activity	molecular_function	0.66523	1	7	14743	40	76974	5	2
GO:0016149	translation release factor activity, codon specific	molecular_function	0.66775	1	10	14743	55	76974	5	5
GO:0050776	regulation of immune response	biological_process	0.67028	1	6	14743	36	76974	5	1
GO:0007224	smoothened signaling pathway	biological_process	0.69101	1	6	14743	41	76974	5	1
GO:0016742	hydroxymethyl-, formyl- and related transferase activity	molecular_function	0.69463	1	7	14743	41	76974	5	2
GO:0016670	oxidoreductase activity, acting on a sulfur group of donors, oxygen as acceptor	molecular_function	0.70854	1	6	14743	36	76974	5	1
GO:0003910	DNA ligase (ATP) activity	molecular_function	0.716	1	10	14743	57	76974	5	5
GO:0051346	negative regulation of hydrolase activity	biological_process	0.74229	1	6	14743	40	76974	5	1
GO:0019238	cyclohydrolase activity	molecular_function	0.75747	1	6	14743	38	76974	5	1
GO:0006743	ubiquinone metabolic process	biological_process	0.77113	1	6	14743	39	76974	5	1
GO:0006744	ubiquinone biosynthetic process	biological_process	0.77113	1	6	14743	39	76974	5	1
GO:0003873	6-phosphofructo-2-kinase activity	molecular_function	0.81331	1	11	14743	72	76974	5	6
GO:0006000	fructose metabolic process	biological_process	0.81331	1	11	14743	72	76974	5	6
GO:0045861	negative regulation of proteolysis	biological_process	0.82673	1	10	14743	66	76974	5	5
GO:0008083	growth factor activity	molecular_function	0.84344	1	10	14743	67	76974	5	5
GO:0004112	cyclic-nucleotide phosphodiesterase activity	molecular_function	0.85204	1	6	14743	42	76974	5	1
GO:0033897	ribonuclease T2 activity	molecular_function	0.85507	1	5	14743	38	76974	5	0
GO:0009982	pseudouridine synthase activity	molecular_function	0.8735	1	10	14743	69	76974	5	5
GO:0031625	ubiquitin protein ligase binding	molecular_function	0.89534	1	8	14743	56	76974	5	3
GO:0044389	ubiquitin-like protein ligase binding	molecular_function	0.89534	1	8	14743	56	76974	5	3
GO:0016872	intramolecular lyase activity	molecular_function	0.90498	1	14	14743	99	76974	5	9
GO:0009847	spore germination	biological_process	0.91561	1	6	14743	48	76974	5	1
GO:1901661	quinone metabolic process	biological_process	0.92486	1	6	14743	49	76974	5	1
GO:1901663	quinone biosynthetic process	biological_process	0.92486	1	6	14743	49	76974	5	1
GO:0003909	DNA ligase activity	molecular_function	0.92512	1	10	14743	73	76974	5	5
GO:0005759	mitochondrial matrix	cellular_component	0.92756	1	5	14743	44	76974	5	0
GO:0015105	arsenite transmembrane transporter activity	molecular_function	0.9315	1	5	14743	41	76974	5	0
GO:0015700	arsenite transport	biological_process	0.9315	1	5	14743	41	76974	5	0
GO:0070069	cytochrome complex	cellular_component	0.93161	1	7	14743	62	76974	5	2
GO:0042181	ketone biosynthetic process	biological_process	0.93368	1	6	14743	50	76974	5	1
GO:0008200	ion channel inhibitor activity	molecular_function	0.9355	1	6	14743	51	76974	5	1
GO:0016248	channel inhibitor activity	molecular_function	0.9355	1	6	14743	51	76974	5	1
GO:0016884	carbon-nitrogen ligase activity, with glutamine as amido-N-donor	molecular_function	0.94132	1	6	14743	49	76974	5	1
GO:0030123	AP-3 adaptor complex	cellular_component	0.95199	1	8	14743	80	76974	5	3
GO:0098803	respiratory chain complex	cellular_component	0.95627	1	7	14743	68	76974	5	2
GO:0001522	pseudouridine synthesis	biological_process	0.96908	1	10	14743	85	76974	5	5
GO:0008536	Ran GTPase binding	molecular_function	0.96958	1	10	14743	80	76974	5	5
GO:0022843	voltage-gated cation channel activity	molecular_function	0.97398	1	5	14743	51	76974	5	0
GO:0006022	aminoglycan metabolic process	biological_process	0.9743	1	13	14743	108	76974	5	8
GO:0019207	kinase regulator activity	molecular_function	0.98179	1	9	14743	83	76974	5	4
GO:0019751	polyol metabolic process	biological_process	0.99043	1	12	14743	105	76974	5	7
GO:0032879	regulation of localization	biological_process	0.99924	1	9	14743	110	76974	5	4
GO:0000148	1,3-beta-D-glucan synthase complex	cellular_component	0.99999	1	8	14743	139	76974	5	3
GO:0003843	1,3-beta-D-glucan synthase activity	molecular_function	0.99999	1	8	14743	139	76974	5	3
GO:0006074	(1->3)-beta-D-glucan metabolic process	biological_process	0.99999	1	8	14743	139	76974	5	3
GO:0006075	(1->3)-beta-D-glucan biosynthetic process	biological_process	0.99999	1	8	14743	139	76974	5	3
GO:0030682	evasion or tolerance of host defense response	biological_process	1	1	6	14743	164	76974	5	1
GO:0051807	evasion or tolerance of defense response of other organism involved in symbiotic interaction	biological_process	1	1	6	14743	164	76974	5	1
GO:0009425	bacterial-type flagellum basal body	cellular_component	0.002492	0.081255	7	14743	12	76974	4	3
GO:0004826	phenylalanine-tRNA ligase activity	molecular_function	0.011304	0.26021	7	14743	14	76974	4	3
GO:0046658	anchored component of plasma membrane	cellular_component	0.014884	0.29807	5	14743	9	76974	4	1
GO:0003830	beta-1,4-mannosylglycoprotein 4-beta-N-acetylglucosaminyltransferase activity	molecular_function	0.039717	0.52572	6	14743	14	76974	4	2
GO:0006007	glucose catabolic process	biological_process	0.044906	0.57275	5	14743	11	76974	4	1
GO:0019320	hexose catabolic process	biological_process	0.044906	0.57275	5	14743	11	76974	4	1
GO:0046365	monosaccharide catabolic process	biological_process	0.044906	0.57275	5	14743	11	76974	4	1
GO:0004367	glycerol-3-phosphate dehydrogenase [NAD+] activity	molecular_function	0.047975	0.59131	9	14743	26	76974	4	5
GO:0006471	protein ADP-ribosylation	biological_process	0.052513	0.63221	10	14743	30	76974	4	6
GO:0019089	transmission of virus	biological_process	0.085893	0.88795	8	14743	25	76974	4	4
GO:0044007	dissemination or transmission of symbiont from host	biological_process	0.085893	0.88795	8	14743	25	76974	4	4
GO:0051821	dissemination or transmission of organism from other organism involved in symbiotic interaction	biological_process	0.085893	0.88795	8	14743	25	76974	4	4
GO:0004435	phosphatidylinositol phospholipase C activity	molecular_function	0.09852	0.97195	8	14743	25	76974	4	4
GO:0004629	phospholipase C activity	molecular_function	0.09852	0.97195	8	14743	25	76974	4	4
GO:0000156	phosphorelay response regulator activity	molecular_function	0.11198	1	5	14743	14	76974	4	1
GO:0004379	glycylpeptide N-tetradecanoyltransferase activity	molecular_function	0.11459	1	6	14743	18	76974	4	2
GO:0019107	myristoyltransferase activity	molecular_function	0.11459	1	6	14743	18	76974	4	2
GO:0000279	M phase	biological_process	0.12663	1	5	14743	15	76974	4	1
GO:0022403	cell cycle phase	biological_process	0.12663	1	5	14743	15	76974	4	1
GO:0044848	biological phase	biological_process	0.12663	1	5	14743	15	76974	4	1
GO:0006824	cobalt ion transport	biological_process	0.14744	1	4	14743	11	76974	4	0
GO:0015087	cobalt ion transmembrane transporter activity	molecular_function	0.14744	1	4	14743	11	76974	4	0
GO:0016093	polyprenol metabolic process	biological_process	0.14849	1	4	14743	12	76974	4	0
GO:0019348	dolichol metabolic process	biological_process	0.14849	1	4	14743	12	76974	4	0
GO:0001503	ossification	biological_process	0.15435	1	7	14743	24	76974	4	3
GO:0004018	N6-(1,2-dicarboxyethyl)AMP AMP-lyase (fumarate-forming) activity	molecular_function	0.19984	1	4	14743	12	76974	4	0
GO:0009070	serine family amino acid biosynthetic process	biological_process	0.21493	1	6	14743	21	76974	4	2
GO:0007128	meiotic prophase I	biological_process	0.21656	1	4	14743	13	76974	4	0
GO:0051324	prophase	biological_process	0.21656	1	4	14743	13	76974	4	0
GO:0098762	meiotic cell cycle phase	biological_process	0.21656	1	4	14743	13	76974	4	0
GO:0098764	meiosis I cell cycle phase	biological_process	0.21656	1	4	14743	13	76974	4	0
GO:0016842	amidine-lyase activity	molecular_function	0.23593	1	4	14743	13	76974	4	0
GO:0009832	plant-type cell wall biogenesis	biological_process	0.23909	1	4	14743	13	76974	4	0
GO:0010215	cellulose microfibril organization	biological_process	0.23909	1	4	14743	13	76974	4	0
GO:0030198	extracellular matrix organization	biological_process	0.23909	1	4	14743	13	76974	4	0
GO:0043062	extracellular structure organization	biological_process	0.23909	1	4	14743	13	76974	4	0
GO:0070726	cell wall assembly	biological_process	0.23909	1	4	14743	13	76974	4	0
GO:0071668	plant-type cell wall assembly	biological_process	0.23909	1	4	14743	13	76974	4	0
GO:0015939	pantothenate metabolic process	biological_process	0.25238	1	5	14743	18	76974	4	1
GO:0015940	pantothenate biosynthetic process	biological_process	0.25238	1	5	14743	18	76974	4	1
GO:0004733	pyridoxamine-phosphate oxidase activity	molecular_function	0.26214	1	6	14743	25	76974	4	2
GO:0000795	synaptonemal complex	cellular_component	0.26392	1	4	14743	14	76974	4	0
GO:0005986	sucrose biosynthetic process	biological_process	0.26969	1	5	14743	18	76974	4	1
GO:0050307	sucrose-phosphate phosphatase activity	molecular_function	0.26969	1	5	14743	18	76974	4	1
GO:0007606	sensory perception of chemical stimulus	biological_process	0.27205	1	11	14743	48	76974	4	7
GO:0070851	growth factor receptor binding	molecular_function	0.30181	1	9	14743	37	76974	4	5
GO:0004549	tRNA-specific ribonuclease activity	molecular_function	0.31599	1	8	14743	36	76974	4	4
GO:0017048	Rho GTPase binding	molecular_function	0.31959	1	5	14743	19	76974	4	1
GO:0004618	phosphoglycerate kinase activity	molecular_function	0.33471	1	7	14743	30	76974	4	3
GO:0035257	nuclear hormone receptor binding	molecular_function	0.34565	1	4	14743	15	76974	4	0
GO:0051427	hormone receptor binding	molecular_function	0.34565	1	4	14743	15	76974	4	0
GO:0046429	4-hydroxy-3-methylbut-2-en-1-yl diphosphate synthase activity	molecular_function	0.35758	1	8	14743	34	76974	4	4
GO:0052592	oxidoreductase activity, acting on CH or CH2 groups, with an iron-sulfur protein as acceptor	molecular_function	0.35758	1	8	14743	34	76974	4	4
GO:0051262	protein tetramerization	biological_process	0.38889	1	5	14743	21	76974	4	1
GO:0006120	mitochondrial electron transport, NADH to ubiquinone	biological_process	0.38953	1	7	14743	32	76974	4	3
GO:0003856	3-dehydroquinate synthase activity	molecular_function	0.39238	1	4	14743	16	76974	4	0
GO:0016774	phosphotransferase activity, carboxyl group as acceptor	molecular_function	0.40404	1	7	14743	32	76974	4	3
GO:0007600	sensory perception	biological_process	0.40585	1	11	14743	53	76974	4	7
GO:0050877	neurological system process	biological_process	0.40585	1	11	14743	53	76974	4	7
GO:0009086	methionine biosynthetic process	biological_process	0.43116	1	9	14743	41	76974	4	5
GO:0019203	carbohydrate phosphatase activity	molecular_function	0.43846	1	5	14743	22	76974	4	1
GO:0050308	sugar-phosphatase activity	molecular_function	0.43846	1	5	14743	22	76974	4	1
GO:0034702	ion channel complex	cellular_component	0.46036	1	5	14743	24	76974	4	1
GO:0034703	cation channel complex	cellular_component	0.46036	1	5	14743	24	76974	4	1
GO:0019904	protein domain specific binding	molecular_function	0.48596	1	6	14743	28	76974	4	2
GO:0009898	cytoplasmic side of plasma membrane	cellular_component	0.49992	1	7	14743	36	76974	4	3
GO:0098552	side of membrane	cellular_component	0.49992	1	7	14743	36	76974	4	3
GO:0098562	cytoplasmic side of membrane	cellular_component	0.49992	1	7	14743	36	76974	4	3
GO:0004806	triglyceride lipase activity	molecular_function	0.50519	1	6	14743	29	76974	4	2
GO:0003872	6-phosphofructokinase activity	molecular_function	0.5069	1	11	14743	54	76974	4	7
GO:0010109	regulation of photosynthesis	biological_process	0.53294	1	6	14743	31	76974	4	2
GO:0042548	regulation of photosynthesis, light reaction	biological_process	0.53294	1	6	14743	31	76974	4	2
GO:0042549	photosystem II stabilization	biological_process	0.53294	1	6	14743	31	76974	4	2
GO:0043467	regulation of generation of precursor metabolites and energy	biological_process	0.53294	1	6	14743	31	76974	4	2
GO:0009081	branched-chain amino acid metabolic process	biological_process	0.53953	1	5	14743	25	76974	4	1
GO:0009082	branched-chain amino acid biosynthetic process	biological_process	0.53953	1	5	14743	25	76974	4	1
GO:0030269	tetrahydromethanopterin S-methyltransferase activity	molecular_function	0.55021	1	5	14743	27	76974	4	1
GO:0042086	5-methyl-5,6,7,8-tetrahydromethanopterin-dependent methyltransferase activity	molecular_function	0.55021	1	5	14743	27	76974	4	1
GO:0006448	regulation of translational elongation	biological_process	0.5521	1	4	14743	23	76974	4	0
GO:0003008	system process	biological_process	0.56238	1	11	14743	59	76974	4	7
[truncated: 1,804 more rows]
