# Supplementary material for: <span aria-describedby="tippy-17">Transcriptomic and Metabolomic Profiling Provides Insights into Flavonoids Biosynthesis and Flower Coloring in <em>Loropetalum chinense</em> and <em>Loropetalum chinense</em> var. <em>rubrum</em>
Source: Preprints.org preprint supplement (doi:10.20944/preprints202304.0456.v1), 2023-04-18
Supplement: Supplementary file 2 [file supplementary table S1.xlsx]

## Sheet: Table S1
		Supplementary table S1 Type and content of flavonoids in four Loropetalum cultivars
	Index	Compounds	Molecular Weight (Da)	Class	CPS
					LDPF	SE	XNNC	SE	XNFJ	SE	XNXY	SE
1	pma0787	Quercetin-3-(6''-malonyl)-Glucoside	550.1	Flavonol	19100	5373.08	8233.33	3552.88	8113.33	2244.49	46566.7	288.675
2	pma1116	Kaempferide	300.1	Flavonol	108933	48814.4	424667	207351	2.47333e+06	366106	9	0
3	pma6389	Ayanin	344.2	Flavonol	11200	100	18266.7	4193.25	7733.33	1336.95	9306.67	470.779
4	pma6639	Isorhamnetin O-hexoside	478.2	Flavonol	2.36333e+07	2.35018e+06	23500000	1.35277e+06	4.57333e+07	1.41892e+06	2.29667e+06	172434
5	pmb0565	Syringetin 3-O-hexoside	508.1	Flavonol	243667	25794.1	81033.3	17772	771667	32624.1	11446.7	1654.25
6	pmb0595	Isorhamnetin 5-O-hexoside	478.2	Flavonol	4250000	490000	4.57333e+06	466083	8.43667e+06	934897	472667	57761
7	pmb0604	Kaempferol 3-O-glucoside	448.1	Flavonol	1.13667e+07	152753	3530000	353412	7.84667e+06	421940	1.05667e+07	152753
8	pmb0711	Quercetin 7-O-rutinoside	610.2	Flavonol	1300000	165227	5.14667e+06	604676	5.96667e+06	352184	4.23667e+07	1.20554e+06
9	pmb3013	Isorhamnetin O-acetyl-hexoside	520.1	Flavonol	24833.3	7900.21	19933.3	2818.39	145000	10440.3	7786.67	1805.83
10	pmb3026	Quercetin O-acetylhexoside	506.1	Flavonol	385667	45368.9	107733	16517.1	506667	102539	268667	52080.1
11	pmb3894	Di-O-methylquercetin	330.1	Flavonol	94200	20535.8	742000	91804.1	149667	11060.4	314333	20256.7
12	pme0197	Quercetin 3-O-rutinoside	610.153	Flavonol	622667	28571.5	1013000	72917.8	1.59333e+06	119304	13200000	793725
13	pme0200	Kaempferol	286.048	Flavonol	7610000	2.27092e+06	2.61333e+07	3.23316e+06	1.84867e+07	9.16573e+06	60300000	3.36006e+06
14	pme0361	Quercetin 3-alpha-L-arabinofuranoside	434.085	Flavonol	2.52667e+07	650641	1.39667e+07	702377	1.09933e+07	1.19001e+06	2.19667e+07	1.22202e+06
15	pme0369	Kaempferol 3-O-rutinoside	594.159	Flavonol	375667	16623.3	284667	33709.5	1670000	170880	5570000	346987
16	pme1478	Myricetin	318.038	Flavonol	1.25667e+07	1.6563e+06	18100000	3.98873e+06	1.17933e+07	3.32748e+06	1.47333e+07	3.25167e+06
17	pme1500	Kumatakenin	314.079	Flavonol	32633.3	7344.61	52066.7	6412.75	68133.3	18652.7	57533.3	17956.7
18	pme1506	Kaempferol 7-O-rhamnoside	432.106	Flavonol	5.43667e+06	433167	1640000	113578	3.71667e+06	308923	7.99667e+06	45092.5
19	pme1521	Dihydroquercetin	304.058	Flavonol	419667	20550.8	1.88333e+06	101160	812333	22301	1.74333e+06	372872
20	pme1539	Isorhamnetin 3-O-neohesperidoside	624.169	Flavonol	852667	104462	1.09333e+06	70946	1180000	96436.5	382000	57887.8
21	pme1552	Myricetin 3-O-rhamnoside	464.096	Flavonol	7120000	550545	808333	90522.6	1820000	383536	1.70333e+06	20816.7
22	pme1588	Isorhamnetin	316.058	Flavonol	4740000	1.35126e+06	55000000	3.04138e+06	4.09667e+07	1.46838e+07	1.12233e+07	1.37863e+06
23	pme1605	Kaempferol 3-O-robinobioside	594.159	Flavonol	381333	18339.4	287000	19924.9	1.54333e+06	231157	5.75667e+06	345881
24	pme2493	Kaempferol 3,7-dirhamnoside	578.164	Flavonol	131667	7371.11	416333	14189.2	152000	20880.6	556667	29569.1
25	pme2898	Dihydromyricetin	320.053	Flavonol	936333	170840	496667	32715.9	1.42667e+06	144338	958000	58283.8
26	pme2954	Quercetin	302.043	Flavonol	7.37333e+06	1.63714e+06	5.03667e+07	5.19359e+06	1.54733e+07	7.63781e+06	4.67333e+07	5.11599e+06
27	pme2963	Aromadedrin	288.063	Flavonol	746667	85002	754667	50580	697667	33501.2	1.53333e+06	81445.3
28	pme3130	Quercetin 4'-O-glucoside	464.096	Flavonol	4.57667e+06	190088	3.41333e+06	172143	4.07667e+06	165025	4.38333e+06	102144
29	pme3211	Quercetin 3-O-glucoside	464.096	Flavonol	2860000	55677.6	1310000	70000	1970000	131149	2.19667e+06	110151
30	pme3268	Kaempferol 3-O-galactoside	448.101	Flavonol	6.93333e+06	206478	2.45333e+06	179536	5.51667e+06	637913	6.53667e+06	118462
31	pme3288	3,7-Di-O-methylquercetin	330.074	Flavonol	8920	1036.77	36566.7	4796.18	30566.7	10131.8	5933.33	2120.62
32	pme3296	Kaempferol 3-O-rhamnoside	432.106	Flavonol	2.77667e+07	57735	4.02667e+06	306649	1.54667e+07	1.19304e+06	31000000	953939
33	pme3369	Rhamnetin	316.058	Flavonol	44566.7	7651.36	19166.7	6253.27	124800	46429.7	117667	45337.9
34	pme3393	Fustin	288.063	Flavonol	9	0	9	0	9	0	9	0
35	pme3401	Syringetin	346.069	Flavonol	400333	81696.6	1.74667e+06	380175	3.33333e+06	1.14692e+06	373000	50388.5
36	pme3407	Laricitrin	332.053	Flavonol	518000	60058.3	389000	63694.6	427000	60770.1	132667	15631.2
37	pme3442	Quercetin 7-O-β-D-Glucuronide	478.36	Flavonol	236333	8504.9	96733.3	9449.51	212333	31005.4	239000	20808.7
38	pme3484	Myricetin 3-O-galactoside	480.09	Flavonol	30000000	2100000	839333	167479	4.86333e+06	603020	8.39333e+06	148436
39	pme3514	Morin	302.043	Flavonol	649000	187649	2850000	275136	1.07867e+06	453084	2970000	416053
1	pme0355	Daidzein	254.058	Isoflavone	87633.3	10636.9	28666.7	9012.4	18866.7	1882.37	21833.3	6254.86
2	pme1568	Orobol	286.048	Isoflavone	12433.3	3002.22	112333	4163.33	34733.3	3906.83	54566.7	6661.33
3	pme3208	Glycitin	446.121	Isoflavone	9	0	9	0	9	0	8760	1254.91
4	pme3276	2'-Hydroxygenistein	286.048	Isoflavone	8410	2589.65	4506.67	2085.79	20733.3	8418.04	13166.7	4885.01
5	pme3292	Prunetin	284.069	Isoflavone	63833.3	26060.8	93466.7	18238.8	50666.7	16252.5	138333	15695
6	pme3399	Sissotrin	446.121	Isoflavone	139333	30237.9	323333	31659.6	114867	17298.9	257333	75035.5
7	pme3502	Formononetin 7-O-glucoside	430.126	Isoflavone	13166.7	2250.19	25466.7	3323.15	45766.7	9143.49	65200	12330.5
1	pme1667	Isovitexin 7-O-glucoside	594.159	Flavonoid	9	0	9	0	9	0	9	0
2	pmf0109	3-O-Acetylpinobanksin	314.079	Flavonoid	96100	48324.2	1.77333e+06	150444	41966.7	28104.2	93733.3	25969.5
3	pmf0115	Galangin	270.053	Flavonoid	9646.67	3783.65	49933.3	5173.33	5283.33	2739.64	33133.3	5950.07
4	pmf0179	Narcissoside	624.169	Flavonoid	2.86333e+06	205020	2510000	294618	8.37333e+06	1.15578e+06	2.51333e+06	323934
5	pmf0204	Hyperoside	464.096	Flavonoid	5450000	260576	3.78667e+06	80829	4560000	308058	4990000	55677.6
6	pmf0208	Isoquercitroside	464.096	Flavonoid	5.37333e+06	98149.5	4.19667e+06	153080	4880000	173494	5350000	191572
7	pmf0233	Tiliroside	594.137	Flavonoid	34900000	1.05357e+06	32400000	1.05357e+06	3.50333e+07	1.51767e+06	2.12667e+07	1.823e+06
8	pmf0246	Orientin	448.101	Flavonoid	67900	6165.23	28500	1992.49	19233.3	2003.33	24866.7	2081.67
9	pmf0260	Sinensetin	372.121	Flavonoid	1168	288.257	9	0	1570	127.671	2990	1305.03
10	pmf0265	5,7-Dihydroxychromone	178.027	Flavonoid	10766.7	5812.25	144667	21221.1	52633.3	6625.2	34366.7	3481.86
11	pmf0274	Herbacetin	302.043	Flavonoid	667000	183524	2.70333e+06	241316	1085000	481430	2890000	207846
12	pmf0279	Gossypitrin	464.095	Flavonoid	40300000	360555	2.74333e+07	2.25462e+06	3.42667e+07	1.35769e+06	3.83333e+07	1.07858e+06
13	pmf0302	Engeletin	434.121	Flavonoid	1060000	65574.4	325333	19629.9	819000	29461.8	1.63333e+06	56862.4
14	pmf0330	Spinosin	608.174	Flavonoid	4830	1196.62	9	0	5466.67	935.86	23566.7	4485.9
15	pmf0361	Astilbin	450.116	Flavonoid	1.14333e+06	63508.5	848000	86185.8	238000	45210.6	2.08333e+06	120554
16	pmf0362	Hydroxygenkwanin	300.063	Flavonoid	4070	1681.46	32433.3	4964.21	12730	4249.67	46666.7	4055.04
17	pmf0369	Persicoside	478.148	Flavonoid	370333	103452	80333.3	7695.67	328333	56438.8	12133.3	2281.08
18	pmf0371	Pedalitin	316.058	Flavonoid	2.47333e+06	50332.2	4.87667e+06	736637	2.52667e+06	369639	5570000	823954
19	pmf0374	Isorhamnetin 3-O-glucoside	478.111	Flavonoid	4.48333e+07	8.5143e+06	2.36667e+07	3.10698e+06	8.88667e+07	5.72742e+06	1900000	115326
20	pmf0382	5,7-Dihydroxy-3',4',5'-trimethoxyflavone	344.09	Flavonoid	7086.67	2423.25	66000	9328.99	6730	2193.56	6393.33	530.031
21	pmf0392	Persicogenin	316.095	Flavonoid	1829.67	1987.52	12766.7	1929.59	4536.67	2305.31	4373.33	800.021
22	pmf0472	Apiin	564.148	Flavonoid	9	0	7666.67	1447.8	5573.33	1532.39	9	0
23	pmf0550	Diosmin	608.174	Flavonoid	49773.3	35878.5	45366.7	23511.8	5.65667e+06	511892	35903	31085.2
24	pmf0567	Tectorigenin	300.063	Flavonoid	1506.67	521.76	4750	833.727	2646.67	1000.02	726	1241.88
25	pmf0582	Glabridin	324.136	Flavonoid	9	0	9	0	9	0	9	0
26	pmf0583	Phloridzin	436.137	Flavonoid	2.78333e+06	15275.3	3950000	476970	1.61333e+06	28867.5	2770000	52915
1	pma0249	Selgin 5-O-hexoside	478.118	Flavone	513667	72016.2	4.16333e+06	1.07519e+06	1.42667e+06	592818	1.24333e+06	270062
2	pma0253	O-methylChrysoeriol 5-O-hexoside	476.14	Flavone	16636.7	6991.64	71133.3	15454.6	29700	8107.4	290000	92455.4
3	pma0724	Naringenin C-hexoside	434.1	Flavone	9	0	9	0	9	0	9	0
4	pma0760	Selgin O-malonylhexoside	564	Flavone	17400	2551.47	34666.7	4188.48	124333	5033.22	5170	574.195
5	pma0779	Tricin O-rhamnosyl-O-malonylhexoside	724.2	Flavone	9	0	5103.33	4246.24	5706.67	1979.05	9	0
6	pma1108	Apigenin C-glucoside	432.113	Flavone	686	1172.6	16116.7	9155.64	3463.33	788.31	4833.33	2485.34
7	pma6218	O-methylnaringenin C-pentoside	418.1	Flavone	17633.3	2814.84	51200	11099.1	28600	10612.7	15366.7	5519.36
8	pma6496	Luteolin 6-C-glucoside	448.1	Flavone	1672.67	2881.56	8580	1857.85	4193.33	1659.29	3909.67	3623.19
9	pma6515	C-hexosyl-chrysin O-feruloylhexoside	754.2	Flavone	9	0	7046.67	1740.61	9083.33	1797.45	9	0
10	pma6558	Velutin	314.08	Flavone	29300	3724.24	41500	10049.4	46300	16955.5	65233.3	30200.4
11	pma6576	Spinacetin	346	Flavone	194667	10692.7	23233.3	9743.89	217333	84760.4	11500	1311.49
12	pma6638	O-methylChrysoeriol 7-O-hexoside	476.2	Flavone	20733.3	7343.25	68400	14799	33233.3	6915.44	300000	97616.6
13	pma6647	C-hexosyl-chrysoeriol O-hexoside	624.2	Flavone	14533.3	2706.17	9	0	9	0	40100	5469
14	pmb0566	Luteolin O-hexosyl-O-pentoside	580.2	Flavone	55533.3	5216.64	93433.3	25605.9	96000	11732	74400	8371.98
15	pmb0576	Apigenin O-malonylhexoside	518	Flavone	16166.7	1594.78	13066.7	2653.93	17343.3	11907.8	12336.7	7326.6
16	pmb0579	Chrysoeriol O-sinapoylhexoside	668	Flavone	9	0	16166.7	3950.11	46433.3	9244.64	9	0
17	pmb0580	Chrysin 5-O-glucoside	416.1	Flavone	521000	51117.5	250667	24214.3	328333	23288.1	121433	34846.3
18	pmb0588	Luteolin 3',7-di-O-glucoside	610.1	Flavone	753333	40079.1	110000	3464.1	267000	25238.9	1660000	0
19	pmb0592	Chrysoeriol O-hexosyl-O-rutinoside	770.1	Flavone	27566.7	550.757	96700	17055.5	28333.3	4992.33	32566.7	850.49
20	pmb0600	Chrysoeriol 7-O-rutinoside	608.4	Flavone	9	0	9	0	4700000	356791	9	0
21	pmb0602	Syringetin 7-O-hexoside	508.3	Flavone	1.12667e+07	750555	1750000	105830	15100000	1.08167e+06	681333	78653.2
22	pmb0618	8-C-hexosyl-hesperetin O-hexoside	626.1	Flavone	30500000	2700000	1.33333e+07	1.11505e+06	3.82667e+06	353883	2.89667e+07	3.05014e+06
23	pmb0622	C-hexosyl-luteolin O-hexoside	610.2	Flavone	9	0	9	0	9	0	2006.67	866.737
24	pmb0624	6-C-hexosyl-luteolin O-hexoside	610.1	Flavone	65566.7	9219.73	14333.3	832.666	15666.7	1250.33	99133.3	6306.61
25	pmb0628	Eriodictiol C-hexosyl-O-hexoside	612.1	Flavone	1.83333e+06	55075.7	132667	18583.1	287000	32741.4	2.44667e+06	192180
26	pmb0629	Chrysoeriol 6-C-hexoside	462.1	Flavone	12633.3	2490.65	22300	1833.03	106400	6548.28	9	0
27	pmb0645	6-C-hexosyl-hesperetin O-hexoside	626.1	Flavone	7.35333e+06	347898	4.70333e+06	85049	8050000	1.0387e+06	7730000	545802
28	pmb0647	8-C-hexosyl-luteolin O-pentoside	580.1	Flavone	11500	3119.29	9	0	22533.3	6047.59	17400	3143.25
29	pmb0653	"di-C,C-hexosyl-apigenin"	594.1	Flavone	2002.67	3453.13	41933.3	5853.49	483667	27970.2	9	0
30	pmb0660	C-hexosyl-luteolin O-p-coumaroylhexoside	756.2	Flavone	7526.67	1504.8	24666.7	6851.52	15566.7	1985.78	10306.7	1500.71
31	pmb0663	8-C-hexosyl-luteolin O-hexoside	610.1	Flavone	42800	8842.51	93300	6331.67	133333	12503.3	44166.7	8936.63
32	pmb0665	Luteolin 8-C-hexosyl-O-hexoside	610.2	Flavone	54366.7	6627.47	160333	10116	197000	20223.7	2.06667e+06	126623
33	pmb0689	Chrysoeriol C-hexoside	462.1	Flavone	12933.3	808.29	13896.7	4809.79	11503.3	3360.66	10663.3	4798.86
34	pmb0696	8-C-hexosyl chrysoeriol O-hexoside	624	Flavone	5850000	1.43259e+06	2.41333e+07	2.02567e+06	4.98333e+07	1.53337e+07	9	0
35	pmb0701	Chrysoeriol 8-C-hexoside	462.1	Flavone	9	0	9	0	9	0	9	0
36	pmb0713	Tricin 7-O-hexosyl-O-hexoside	654.2	Flavone	134333	23501.8	916333	183957	1830000	85440	9	0
37	pmb0724	Tricin O-rhamnoside	476.1	Flavone	373000	26851.4	423333	28536.5	181333	7371.11	270333	27537.9
38	pmb0725	Tricin 7-O-feruloylhexoside	668.1	Flavone	10800	458.258	2356.67	228.108	5233.33	1044.14	15166.7	2136.2
39	pmb0732	Tricin 5-O-feruloylhexoside	668.1	Flavone	18566.7	3043.57	30566.7	2888.48	33800	5771.48	31133.3	4675.82
40	pmb0739	Tricin O-hexosyl-O-syringin alcohol	658.3	Flavone	158667	40129	7833.33	316.596	9866.67	3233.22	225000	6082.76
41	pmb0746	Tricin 4'-O-β-guaiacylglycerol	526.1	Flavone	5303.33	251.064	4786.67	732.006	2616.67	557.165	4646.67	719.884
42	pmb2850	Tricin	330	Flavone	76833.3	15347.4	630333	185907	146333	31005.4	818333	91729.7
43	pmb2983	Chrysoeriol C-pentosyl-O-rhamnosyl-rhamnoside	724.1	Flavone	1166.67	80.2081	3370	605.062	1480	574.543	4910	130.767
44	pmb2987	Acacetin O-acetyl hexoside	488.1	Flavone	36500	2762.25	53633.3	13194.1	20066.7	3982.88	44366.7	4026.58
45	pmb2992	Acacetin O-glucuronic acid	460.1	Flavone	2853.33	1420.47	29533.3	9108.97	27733.3	4554.48	9	0
46	pmb2999	Chrysoeriol 5-O-hexoside	462.1	Flavone	69933.3	16226.3	111833	19470.1	196000	4358.9	131000	17521.4
47	pmb3006	Apigenin 7-O-glucoside	432.1	Flavone	61566.7	9001.3	24433.3	5714.31	36966.7	4957.15	46766.7	7214.11
48	pmb3014	Luteolin O-eudesmic acid-O-hexoside	642.1	Flavone	11010	1810.06	53400	8428.52	25166.7	6724.09	70833.3	4441.1
49	pmb3023	Eriodictyol C-hexoside	450.1	Flavone	4520000	180831	2.41667e+06	246644	5.56667e+06	778481	4940000	515073
50	pmb3024	Luteolin C-hexoside	448.1	Flavone	9	0	499.333	849.282	9	0	9	0
51	pmb3037	Tricin O-malonyl shikimic acid	572.1	Flavone	5430	912.634	2160	1075.55	1553.33	436.616	1242.67	306.596
52	pmb3041	Tricin O-saccharic acid	522.1	Flavone	1220000	117898	1.45333e+06	61101	637667	50954.2	2.77333e+06	352326
53	pmb3045	Tricin O-glucuronic acid	506.1	Flavone	9	0	9	0	9	0	9	0
54	pmb3046	Tricin 7-O-hexoside	492.1	Flavone	26900	2821.35	20633.3	4168.13	70900	3439.48	56566.7	6013.6
55	pmb3047	Tricin 4'-O-(syringyl alcohol) ether 5-O-hexoside	658.1	Flavone	93400	4500	26966.7	4166.93	29633.3	4215.84	39833.3	2542.31
56	pme0088	Luteolin	286	Flavone	80733.3	17138.9	291000	19078.8	174000	36756	213667	10016.7
57	pme0208	Amentoflavone	538.09	Flavone	67266.7	17808	56433.3	11943.8	85866.7	18188.3	153667	9073.77
58	pme0324	Chrysin	254.058	Flavone	8013.33	4037.33	128667	2081.67	2783.33	1500.71	5766.67	1411
59	pme0333	Apigenin 7-O-neohesperidoside	578.164	Flavone	61300	10912.4	195667	20744.5	77933.3	9928.91	267333	12662.3
60	pme0359	Apigenin 5-O-glucoside	432.106	Flavone	9	0	9	0	9	0	9	0
61	pme0363	Chrysoeriol	300.063	Flavone	68033.3	72794.4	165000	25357.4	51433.3	15014.1	90066.7	18030.6
62	pme0367	Apigenin 7-rutinoside (Isorhoifolin)	578.164	Flavone	9	0	8203.33	2814.08	45700	10423.1	9	0
63	pme0379	Apigenin	270.053	Flavone	40233.3	9761.83	68800	9506.31	32800	4744.47	158000	19287.3
64	pme1510	Baicalein	270.053	Flavone	12246.7	7333.33	19533.3	2454.25	12366.7	321.455	14366.7	1497.78
65	pme1518	Nobiletin	402.132	Flavone	21533.3	5894.35	27633.3	14436.9	57033.3	15284.4	86800	23779.8
66	pme1541	Acacetin	284.069	Flavone	67300	30120.9	95000	20822.1	54433.3	15109.7	145667	17214.3
67	pme1550	Tangeretin	372.121	Flavone	12353.3	5461.18	18700	9873.2	33000	10262.1	62833.3	17611.7
68	pme1601	Apigenin 4-O-rhamnoside	416.111	Flavone	9	0	9	0	9	0	9	0
69	pme1611	Isohemiphloin	434.121	Flavone	386000	52028.8	244000	45923.9	115333	26539.3	283000	35028.6
70	pme1624	Isovitexin	432.106	Flavone	1506.33	1471.23	14806.7	5162.18	4000	480	4626.67	1436.47
71	pme1662	sakuranetin	286.084	Flavone	5986.67	1531.15	22566.7	10060	10706.7	4110.49	6836.67	811.193
72	pme2457	Luteolin 7-O-glucoside	448.101	Flavone	129333	15176.7	83300	8944.83	105067	23908.4	48633.3	9849.03
73	pme3303	Tricetin	302.043	Flavone	3.02667e+06	426185	2110000	257099	328333	21548.4	5470000	727736
74	pme3473	Butin	272.069	Flavone	1.24667e+06	37859.4	2170000	115326	3330000	336452	1.10333e+06	5773.5
75	pme3509	7,4'-Dihydroxyflavone	254.058	Flavone	51033.3	9004.63	21900	2600	12080	5325.52	10453.3	1981.55
76	pmf0011	Apigenin 6,8-C-diglucoside	594.159	Flavone	2006.67	237.136	3290	810.617	3170	444.41	9	0
77	pmf0012	6,8-di-C-glucoside Apigenine	594.159	Flavone	24533.3	3385.75	33133.3	6028.54	7583.33	260.832	17466.7	1401.19
78	pmf0057	4,2',4',6'-Tetrahydroxychalcone	272.068	Flavone	833667	38188.1	3.82667e+06	205508	1.45333e+06	102144	1.89333e+06	150111
1	pmb2975	Hesperetin O-Glucuronic acid	478.1	Flavanone	38133.3	8638.48	13423.3	6805.41	82466.7	24431.6	9	0
2	pmb2979	Hesperetin O-malonylhexoside	550.2	Flavanone	100033	13397.9	1.37333e+06	176163	1880000	269629	452667	32654.8
3	pmc1990	4'-Hydroxy-5,7-dimethoxyflavanone	300.1	Flavanone	2100000	40000	1.65333e+06	70946	1.83333e+06	126623	1.52333e+06	179536
4	pme0001	Hesperetin 7-O-neohesperidoside	610.19	Flavanone	284000	145918	1.14667e+06	223681	467000	302590	862000	166154
5	pme0372	Naringenin 7-O-glucoside	434.121	Flavanone	1319003	2.14157e+06	1387000	2.03796e+06	9	0	1.28067e+07	3.80843e+06
6	pme0376	Naringenin	272.068	Flavanone	770333	42336	1240000	117898	1.95333e+06	230940	646000	31192.9
7	pme1201	Phloretin	274.084	Flavanone	328667	29365.5	1.27533e+06	256409	304333	26501.6	426000	22605.3
8	pme1580	Eriodictyol	288.063	Flavanone	1570000	431393	38000000	2.85832e+06	6.93333e+06	599694	1.19667e+07	2.49867e+06
9	pme1598	Hesperetin 5-O-glucoside	464.132	Flavanone	2940000	210713	1.24333e+06	85049	2.03667e+06	60277.1	2.34667e+06	315331
10	pme1599	7-O-Methyleriodictyol	302.079	Flavanone	231333	112100	10080000	1.74983e+06	1.58333e+06	176163	628333	23072.3
11	pme2319	Hesperetin	302.079	Flavanone	22133.3	5153.96	2.03667e+06	260256	173333	34588.1	72500	4550.82
12	pme2949	Hesperetin 7-rutinoside	610.19	Flavanone	228667	52974.8	1.03167e+06	305219	457000	267305	942333	290541
13	pme2957	Naringenin chalcone	272.069	Flavanone	1270000	96436.5	2120000	196723	3.29667e+06	436616	1074000	105773
14	pme2982	Pinocembrin	256.074	Flavanone	37266.7	17532.1	259000	5000	42866.7	8663.33	17066.7	1625.83
15	pme2984	Isosakuranetin-7-neohesperidoside	594.195	Flavanone	6610000	257099	5.43667e+06	305669	6.12667e+06	540123	3.97667e+06	105040
16	pme3215	Isoliquiritigenin	256.074	Flavanone	3946.67	415.492	7633.33	657.445	4823.33	587.736	4156.67	474.271
17	pme3285	Afzelechin	274.084	Flavanone	9	0	179000	47148.7	7410	776.724	8986.67	1949.8
18	pme3461	Homoeriodictyol	302.279	Flavanone	212667	93275.6	8.31667e+06	869502	1223000	271177	3730000	1.16245e+06
19	pme3464	Isosakuranetin	286.084	Flavanone	72433.3	64016.4	505333	88058.7	181033	99657.4	81066.7	23050.9
20	pmf0058	4',5,7-Trihydroxyflavanone	272.068	Flavanone	945667	48013.9	4240000	147309	1.62333e+06	144684	2150000	190000
1	pmb0835	Gallocatechin-gallocatechin	610.2	Polyphenol	21900000	5.15073e+06	70800000	9.91363e+06	1.55333e+07	1.16762e+06	510333	78213.4
2	pmb2831	Protocatechuic acid O-glucoside	316.1	Polyphenol	3.75333e+06	76376.3	5.94667e+06	510033	7.76333e+06	342977	4.35667e+06	636894
3	pmb2947	Catechin-catechin-catechin	866.1	Polyphenol	613667	52880.4	625333	24542.5	229333	16802.8	687667	42359.6
4	pmb3114	Epicatechin-epiafzelechin	562.1	Polyphenol	45033.3	2013.29	30133.3	5052.06	16400	721.11	86366.7	9450.04
5	pme0205	Catechin	290.079	Polyphenol	728000	179853	2.10333e+07	1.00664e+06	1650000	108167	5.12667e+06	615169
6	pme0450	L-Epicatechin	290.3	Polyphenol	1.37333e+07	838650	2.59333e+07	814453	9.12667e+06	575007	3.83667e+07	2.40069e+06
7	pme1486	Epigallate catechin gallate	458.085	Polyphenol	4.65333e+07	3.52184e+06	4.91333e+07	1.65025e+06	20100000	1.47986e+06	4.18667e+07	5.06491e+06
8	pme1514	Epigallocatechin	306	Polyphenol	8.27667e+06	1.10011e+06	10330000	877895	2.69333e+06	207445	7.52333e+06	769567
9	pme1535	(+)-Gallocatechin	306.074	Polyphenol	5.14333e+06	447698	1.61667e+07	568624	2.38667e+06	126623	4.48333e+06	127017
10	pme1562	Epicatechin gallate	442.3	Polyphenol	1.32333e+07	1.51767e+06	53500000	1.76918e+06	1.30333e+07	288675	4.67667e+07	493288
11	pme1824	Protocatechuic acid	154.027	Polyphenol	523667	50954.2	866000	90216.4	598000	70171.2	1.54333e+06	234592
12	pme2247	Ellagic acid	302.006	Polyphenol	265667	20404.2	202000	17578.4	227333	59702	164000	28053.5
13	pme2478	Protocatechuic aldehyde	138.032	Polyphenol	41200	1417.74	41400	1385.64	61600	7362.74	53166.7	4804.51
14	pmf0216	Catechin gallate，CG	442.09	Polyphenol	358000	58660	3080000	355949	432000	8000	1.89333e+06	94516.3
15	pmf0238	Theaflavin-3-gallate	716.138	Polyphenol	59733.3	7600.22	751333	10263.2	173333	17616.3	64633.3	8500.78
16	pmf0240	Theaflavin	716.138	Polyphenol	59400	5632.05	752667	29501.4	168333	18583.1	64233.3	5507.57
17	pmf0344	(-)-Epiafzelechin	274.084	Polyphenol	3446.67	792.864	7430	1955.17	6410	1395.24	36466.7	3911.95
18	pmf0379	Gallocatechin gallate	458.085	Polyphenol	2.23667e+06	385011	2.60333e+06	335012	817333	136078	1.89333e+06	132035
19	pmf0458	6-Gingerol	294.183	Polyphenol	722667	117023	833333	138551	1800000	477912	1.08467e+06	182278
1	pmb0550	Cyanidin 3-O-glucoside	449.1	Anthocyanins	1.76667e+08	2.51661e+06	1.20667e+08	7.57188e+06	202000000	7.93725e+06	6330000	2.77842e+06
2	pmb0563	Peonidin	301.1	Anthocyanins	118567	39534.3	515000	311379	3010000	659621	9	0
3	pmb2957	Cyanidin O-syringic acid	466.1	Anthocyanins	22600000	4.39659e+06	1.96667e+07	6.74858e+06	9	0	192667	99931.6
4	pme0442	Delphinidin	303.24	Anthocyanins	253667	56145.6	41600	12967.7	9	0	236667	70614
5	pme1398	Delphinidin 3-O-glucoside	465.1	Anthocyanins	5.08667e+07	5.20128e+06	1.12667e+07	981495	39100000	3.2078e+06	228333	74036
6	pme1773	Cyanidin 3-O-rutinoside	595	Anthocyanins	89266.7	11757.7	164333	23180.5	153000	13892.4	277333	30892.3
7	pme1777	Cyanidin 3,5-O-diglucoside	611	Anthocyanins	2.17333e+07	4.42982e+06	74400000	1.66676e+07	1.78667e+07	1.45029e+06	390000	50109.9
8	pme1793	Pelargonin	595	Anthocyanins	1650000	245153	5490000	412432	1.80667e+07	550757	104200	15520
9	pme3391	Petunidin 3-O-glucoside	479	Anthocyanins	5120000	1.46369e+06	1.67667e+06	280238	5.15333e+06	310215	9	0
10	pme3392	Pelargonidin 3-O-beta-D-glucoside	433.1	Anthocyanins	5.34667e+06	625327	3310000	156205	81100000	1.49332e+06	95900	15614.4
11	pme3609	Cyanidin	287.24	Anthocyanins	118033	25197.3	9	0	9	0	9	0
12	pmf0027	Cyanidin 3-O-galactoside	448.101	Anthocyanins	9250000	1.27432e+06	5.27333e+06	704438	23000000	1.04403e+06	189667	80884.7
13	pmf0615	Petunidin 3, 5-diglucoside	641.4	Anthocyanins	10690000	671789	2.86333e+07	4.21466e+06	6.71333e+06	582866	98866.7	24848.6
14	pmf0616	Malvidin 3-acetyl-5-diglucoside	697.1	Anthocyanins	9	0	39766.7	9412.93	13466.7	2328.81	9	0
15	pmf0617	Peonidin 3-sophoroside-5-glucoside	787.23	Anthocyanins	4063.33	846.306	83900	19068.6	67400	10942.1	9	0
1	pme0431	Procyanidin A1	576.127	Proanthocyanidins	24633.3	2891.94	83700	21014.5	25133.3	3611.56	75733.3	10800.6
2	pme0434	Procyanidin B2	578.142	Proanthocyanidins	4.73333e+06	466083	7.24333e+06	55075.7	3.57333e+06	318957	8.92333e+06	1.03074e+06
3	pme0436	Procyanidin B3	578.142	Proanthocyanidins	4.96333e+06	343123	7.48667e+06	126623	3.86667e+06	239653	9.44667e+06	669428
