# Supplementary material for: <span aria-describedby="tippy-17">Transcriptomic and Metabolomic Profiling Provides Insights into Flavonoids Biosynthesis and Flower Coloring in <em>Loropetalum chinense</em> and <em>Loropetalum chinense</em> var. <em>rubrum</em>
Source: Preprints.org preprint supplement (doi:10.20944/preprints202304.0456.v1), 2023-04-18
Supplement: Supplementary file 3 [file supplementary table S10.xlsx]

## Sheet: Table S10 
Supplementary table S10 The differentially concentration of flavonoid metabolites analysis in group of LDPF VS XNFJ
Index	Compounds	Class	LDPF1	LDPF2	LDPF3	XNFJ1	XNFJ2	XNFJ3	VIP	Fold_Change	LogFC	type
pma0760	Selgin O-malonylhexoside	Flavone	19900	14800	17500	119000	129000	125000	1.19999	7.14559	2.83705	up
pma0779	Tricin O-rhamnosyl-O-malonylhexoside	Flavone	9	9	9	4080	7910	5130	2.16618	634.074	9.30851	up
pma1108	Apigenin C-glucoside	Flavone	2040	9	9	2720	3380	4290	1.5068	5.04859	2.33588	up
pma1116	Kaempferide	Flavonol	163000	68100	95700	2370000	2880000	2170000	1.51605	22.705	4.50494	up
pma6496	Luteolin 6-C-glucoside	Flavone	5000	9	9	6090	3480	3010	1.41464	2.50697	1.32595	up
pma6515	C-hexosyl-chrysin O-feruloylhexoside	Flavone	9	9	9	8500	11100	7650	2.24884	1009.26	9.97908	up
pma6647	C-hexosyl-chrysoeriol O-hexoside	Flavone	15400	16700	11500	9	9	9	2.32401	0.000619266	-10.6572	down
pmb0563	Peonidin	Anthocyanins	164000	92000	99700	2310000	3620000	3100000	1.53648	25.3866	4.66599	up
pmb0579	Chrysoeriol O-sinapoylhexoside	Flavone	9	9	9	50200	35900	53200	2.50003	5159.26	12.3329	up
pmb0600	Chrysoeriol 7-O-rutinoside	Flavone	9	9	9	4310000	5010000	4780000	3.1058	522222	18.9943	up
pmb0618	8-C-hexosyl-hesperetin O-hexoside	Flavone	30500000	33200000	27800000	3940000	4110000	3430000	1.23168	0.125464	-2.99465	down
pmb0624	6-C-hexosyl-luteolin O-hexoside	Flavone	60700	59800	76200	17100	15100	14800	1.01875	0.238943	-2.06526	down
pmb0628	Eriodictiol C-hexosyl-O-hexoside	Flavone	1830000	1780000	1890000	315000	295000	251000	1.1654	0.156545	-2.67535	down
pmb0629	Chrysoeriol 6-C-hexoside	Flavone	11400	11000	15500	112000	99200	108000	1.24905	8.42216	3.07419	up
pmb0653	di-C,C-hexosyl-apigenin	Flavone	9	9	5990	505000	452000	494000	2.39216	241.511	7.91595	up
pmb0696	8-C-hexosyl chrysoeriol O-hexoside	Flavone	7190000	4340000	6020000	35800000	66200000	47500000	1.23589	8.51852	3.0906	up
pmb0711	Quercetin 7-O-rutinoside	Flavonol	1110000	1380000	1410000	5810000	6370000	5720000	1.05528	4.58974	2.19841	up
pmb0713	Tricin 7-O-hexosyl-O-hexoside	Flavone	158000	111000	134000	1820000	1920000	1750000	1.38365	13.6228	3.76795	up
pmb0739	Tricin O-hexosyl-O-syringin alcohol	Flavone	135000	136000	205000	13600	8020	7980	1.42125	0.0621849	-4.00729	down
pmb2957	Cyanidin O-syringic acid	Anthocyanins	23900000	17700000	26200000	9	9	9	3.28437	3.9823e-07	-21.2599	down
pmb2979	Hesperetin O-malonylhexoside	Flavanone	111000	104000	85100	2010000	1570000	2060000	1.46335	18.7937	4.23218	up
pmb2992	Acacetin O-glucuronic acid	Flavone	4440	1700	2420	27500	23300	32400	1.29041	9.71963	3.2809	up
pmb3013	Isorhamnetin O-acetyl-hexoside	Flavonol	32700	16900	24900	152000	133000	150000	1.13436	5.83893	2.5457	up
pme0355	Daidzein	Isoflavone	76300	97400	89200	16700	20100	19800	1.0562	0.215291	-2.21564	down
pme0367	Apigenin 7-rutinoside (Isorhoifolin)	Flavone	9	9	9	52500	33700	50900	2.49674	5077.78	12.31	up
pme0369	Kaempferol 3-O-rutinoside (Nicotiflorin)	Flavonol	391000	358000	378000	1690000	1490000	1830000	1.04237	4.44543	2.15232	up
pme0372	Naringenin 7-O-glucoside (Prunin)	Flavanone	3790000	167000	9	9	9	9	1.96939	6.82334e-06	-17.1611	down
pme0442	Delphinidin	Anthocyanins	282000	189000	290000	9	9	9	2.73725	3.54796e-05	-14.7826	down
pme1580	Eriodictyol	Flavanone	1980000	1120000	1610000	6260000	7130000	7410000	1.03806	4.41614	2.14278	up
pme1588	Isorhamnetin	Flavonol	5240000	5770000	3210000	24100000	47900000	50900000	1.22775	8.64276	3.11149	up
pme1599	7-O-Methyleriodictyol	Flavanone	359000	149000	186000	1530000	1440000	1780000	1.18648	6.84438	2.77492	up
pme1605	Kaempferol 3-O-robinobioside (Biorobin)	Flavonol	367000	402000	375000	1570000	1300000	1760000	1.00502	4.0472	2.01693	up
pme1793	Pelargonin	Anthocyanins	1660000	1400000	1890000	17700000	17800000	18700000	1.32437	10.9495	3.45279	up
pme2319	Hesperetin	Flavanone	27400	17100	21900	211000	143000	166000	1.22034	7.83133	2.96926	up
pme3285	Afzelechin (3,5,7,4'-Tetrahydroxyflavan)	Flavanone	9	9	9	8290	7120	6820	2.21713	823.333	9.68533	up
pme3303	Tricetin	Flavone	2620000	3470000	2990000	306000	330000	349000	1.27209	0.10848	-3.2045	down
pme3392	Pelargonidin 3-O-beta-D-glucoside（Callistephin chloride)	Anthocyanins	5370000	4710000	5960000	81700000	79400000	82200000	1.41175	15.1683	3.92299	up
pme3401	Syringetin	Flavonol	447000	448000	306000	2010000	3950000	4040000	1.21834	8.32639	3.05769	up
pme3461	Homoeriodictyol	Flavanone	264000	269000	105000	919000	1440000	1310000	1.11706	5.75078	2.52376	up
pme3484	Myricetin 3-O-galactoside	Flavonol	28500000	29100000	32400000	5550000	4620000	4420000	1.15362	0.162111	-2.62495	down
pme3509	7,4'-Dihydroxyflavone	Flavone	42200	50700	60200	16100	6040	14100	1.01093	0.236708	-2.07882	down
pme3609	Cyanidin	Anthocyanins	146000	111000	97100	9	9	9	2.63339	7.62496e-05	-13.6789	down
pmf0265	5,7-Dihydroxychromone	Flavonoid	17300	6170	8830	53300	45700	58900	1.07221	4.88854	2.28941	up
pmf0361	Astilbin	Flavonoid	1180000	1180000	1070000	186000	260000	268000	1.06998	0.208163	-2.26421	down
pmf0472	Apiin	Flavonoid	9	9	9	5160	4290	7270	2.16488	619.259	9.2744	up
pmf0550	Diosmin	Flavonoid	73700	67100	8520	5220000	6220000	5530000	1.89574	113.649	6.82844	up
pmf0616	Malvidin 3-acetyl-5-diglucoside	Anthocyanins	9	9	9	10800	15100	14500	2.31245	1496.3	10.5472	up
pmf0617	Peonidin 3-sophoroside-5-glucoside.	Anthocyanins	5010	3380	3800	79800	63300	59100	1.43184	16.5874	4.05201	up
