# Supplementary material for: <span aria-describedby="tippy-17">Transcriptomic and Metabolomic Profiling Provides Insights into Flavonoids Biosynthesis and Flower Coloring in <em>Loropetalum chinense</em> and <em>Loropetalum chinense</em> var. <em>rubrum</em>
Source: Preprints.org preprint supplement (doi:10.20944/preprints202304.0456.v1), 2023-04-18
Supplement: Supplementary file 4 [file supplementary table S11.xlsx]

## Sheet: Table S11 
Supplementary table S11 The differentially concentration of flavonoid metabolites analysis in group of LDPF VS XNXY
Index	Compounds	Class	LDPF1	LDPF2	LDPF3	XNXY1	XNXY2	XNXY3	VIP	Fold_Change	LogFC	type
pma0253	O-methylChrysoeriol 5-O-hexoside	Flavone	19900	21400	8610	396000	226000	248000	1.32063	17.4314	4.12361	up
pma1108	Apigenin C-glucoside	Flavone	2040	9	9	5660	6800	2040	1.4349	7.04568	2.81674	up
pma1116	Kaempferide	Flavonol	163000	68100	95700	9	9	9	2.39902	8.26193e-05	-13.5632	down
pma6576	Spinacetin	Flavone	207000	189000	188000	11700	12700	10100	1.32156	0.0590753	-4.0813	down
pma6638	O-methylChrysoeriol 7-O-hexoside	Flavone	27100	22400	12700	412000	233000	255000	1.27358	14.4695	3.85494	up
pma6639	Isorhamnetin O-hexoside	Flavonol	26000000	21300000	23600000	2450000	2110000	2330000	1.19828	0.0971791	-3.36321	down
pmb0550	Cyanidin 3-O-glucoside (Kuromanin)	Anthocyanins	179000000	174000000	177000000	5330000	4190000	9470000	1.43951	0.0358302	-4.80268	down
pmb0563	Peonidin	Anthocyanins	164000	92000	99700	9	9	9	2.41489	7.59067e-05	-13.6854	down
pmb0565	Syringetin 3-O-hexoside	Flavonol	265000	215000	251000	12300	12500	9540	1.37322	0.0469767	-4.41191	down
pmb0595	Isorhamnetin 5-O-hexoside	Flavonol	4740000	3760000	4250000	527000	412000	479000	1.16245	0.111216	-3.16857	down
pmb0602	Syringetin 7-O-hexoside	Flavone	12000000	10500000	11300000	687000	600000	757000	1.31594	0.0604734	-4.04756	down
pmb0622	C-hexosyl-luteolin O-hexoside	Flavone	9	9	9	1760	1290	2970	1.81327	222.963	7.80066	up
pmb0629	Chrysoeriol 6-C-hexoside	Flavone	11400	11000	15500	9	9	9	2.11317	0.000712401	-10.455	down
pmb0665	Luteolin 8-C-hexosyl-O-hexoside	Flavone	48400	61500	53200	2180000	1930000	2090000	1.49871	38.0135	5.24844	up
pmb0696	8-C-hexosyl chrysoeriol O-hexoside	Flavone	7190000	4340000	6020000	9	9	9	2.87221	1.53846e-06	-19.3101	down
pmb0711	Quercetin 7-O-rutinoside	Flavonol	1110000	1380000	1410000	42500000	41100000	43500000	1.46708	32.5897	5.02635	up
pmb0713	Tricin 7-O-hexosyl-O-hexoside	Flavone	158000	111000	134000	9	9	9	2.43449	6.69975e-05	-13.8655	down
pmb0835	Gallocatechin-gallocatechin	Polyphenol	22000000	16700000	27000000	597000	489000	445000	1.51835	0.0233029	-5.42335	down
pmb2850	Tricin	Flavone	93400	74000	63100	805000	916000	734000	1.20749	10.6508	3.41288	up
pmb2957	Cyanidin O-syringic acid	Anthocyanins	23900000	17700000	26200000	149000	122000	307000	1.72081	0.00852507	-6.87407	down
pmb2975	Hesperetin O-Glucuronic acid	Flavanone	41600	28300	44500	9	9	9	2.26762	0.000236014	-12.0488	down
pmb2992	Acacetin O-glucuronic acid	Flavone	4440	1700	2420	9	9	9	1.86773	0.00315421	-8.30851	down
pmb3014	Luteolin O-eudesmic acid-O-hexoside	Flavone	13100	9980	9950	72500	65800	74200	1.07143	6.43355	2.68561	up
pme0197	Quercetin 3-O-rutinoside (Rutin)	Flavonol	593000	650000	625000	14100000	12900000	12600000	1.37279	21.1991	4.40593	up
pme0200	Kaempferol	Flavonol	7920000	9710000	5200000	60000000	63800000	57100000	1.13012	7.92378	2.98619	up
pme0205	Catechin	Polyphenol	935000	639000	610000	5750000	4520000	5110000	1.09546	7.04212	2.81601	up
pme0369	Kaempferol 3-O-rutinoside (Nicotiflorin)	Flavonol	391000	358000	378000	5790000	5750000	5170000	1.28993	14.827	3.89015	up
pme0372	Naringenin 7-O-glucoside (Prunin)	Flavanone	3790000	167000	9	14100000	8520000	15800000	1.61056	9.70935	3.27938	up
pme1398	Delphinidin 3-O-glucoside (Mirtillin)	Anthocyanins	56000000	45600000	51000000	231000	153000	301000	1.83032	0.00448886	-7.79944	down
pme1580	Eriodictyol	Flavanone	1980000	1120000	1610000	14700000	9800000	11400000	1.11261	7.62208	2.93018	up
pme1605	Kaempferol 3-O-robinobioside (Biorobin)	Flavonol	367000	402000	375000	6060000	5830000	5380000	1.29415	15.0962	3.91611	up
pme1777	Cyanidin 3,5-O-diglucoside (Cyanin)	Anthocyanins	22700000	16900000	25600000	444000	381000	345000	1.57176	0.0179448	-5.80029	down
pme1793	Pelargonin	Anthocyanins	1660000	1400000	1890000	93500	122000	97100	1.30321	0.0631515	-3.98504	down
pme2954	Quercetin	Flavonol	7470000	8960000	5690000	47200000	51600000	41400000	1.06491	6.33816	2.66406	up
pme3208	Glycitin	Isoflavone	9	9	9	10200	8180	7900	2.05998	973.333	9.92679	up
pme3285	Afzelechin (3,5,7,4'-Tetrahydroxyflavan)	Flavanone	9	9	9	9540	10600	6820	2.06186	998.519	9.96365	up
pme3391	Petunidin 3-O-glucoside	Anthocyanins	4440000	4120000	6800000	9	9	9	2.85746	1.75781e-06	-19.1178	down
pme3392	Pelargonidin 3-O-beta-D-glucoside（Callistephin chloride)	Anthocyanins	5370000	4710000	5960000	92300	82400	113000	1.57523	0.0179364	-5.80097	down
pme3461	Homoeriodictyol	Flavanone	264000	269000	105000	4720000	4020000	2450000	1.32027	17.5392	4.13251	up
pme3609	Cyanidin	Anthocyanins	146000	111000	97100	9	9	9	2.41741	7.62496e-05	-13.6789	down
pmf0011	Apigenin 6,8-C-diglucoside	Flavone	2260	1970	1790	9	9	9	1.82619	0.00448505	-7.80066	down
pmf0027	Cyanidin 3-O-galactoside	Anthocyanins	9470000	7880000	10400000	146000	140000	283000	1.55296	0.0205045	-5.60792	down
pmf0216	Catechin gallate，CG	Polyphenol	419000	353000	302000	2000000	1860000	1820000	1.01317	5.28864	2.4029	up
pmf0344	(-)-Epiafzelechin	Polyphenol	4010	3790	2540	40900	35000	33500	1.20573	10.5803	3.4033	up
pmf0362	Hydroxygenkwanin	Flavonoid	5660	4240	2310	50600	42500	46900	1.22907	11.466	3.51929	up
pmf0369	Persicoside	Flavonoid	452000	254000	405000	13500	9500	13400	1.4437	0.0327633	-4.93178	down
pmf0374	Isorhamnetin 3-O-glucoside	Flavonoid	48500000	35100000	50900000	1910000	1780000	2010000	1.39229	0.0423792	-4.5605	down
pmf0567	Tectorigenin	Flavonoid	1410	1040	2070	2160	9	9	1.15667	0.481858	-1.05332	down
pmf0615	Petunidin 3, 5-diglucoside	Anthocyanins	11300000	9970000	10800000	122000	72600	102000	1.70274	0.00924852	-6.75656	down
pmf0617	Peonidin 3-sophoroside-5-glucoside.	Anthocyanins	5010	3380	3800	9	9	9	1.93978	0.00221493	-8.81852	down
