# Supplementary material for: <span aria-describedby="tippy-17">Transcriptomic and Metabolomic Profiling Provides Insights into Flavonoids Biosynthesis and Flower Coloring in <em>Loropetalum chinense</em> and <em>Loropetalum chinense</em> var. <em>rubrum</em>
Source: Preprints.org preprint supplement (doi:10.20944/preprints202304.0456.v1), 2023-04-18
Supplement: Supplementary file 5 [file supplementary table S12.xlsx]

## Sheet: Table S12 
Supplementary table S12 The differentially concentration of flavonoid metabolites analysis in group of XNNC VS XNFJ
Index	Compounds	Class	XNNC1	XNNC2	XNNC3	XNFJ1	XNFJ2	XNFJ3	VIP	Fold_Change	LogFC	type
pma0760	Selgin O-malonylhexoside	Flavone	38100	35900	30000	119000	129000	125000	1.01929	3.58654	1.84259	up
pma1108	Apigenin C-glucoside	Flavone	13100	26400	8850	2720	3380	4290	1.0333	0.214891	-2.21832	down
pma1116	Kaempferide	Flavonol	403000	642000	229000	2370000	2880000	2170000	1.19332	5.82418	2.54205	up
pma6576	Spinacetin	Flavone	33900	14800	21000	315000	174000	163000	1.32843	9.35438	3.22564	up
pmb0563	Peonidin	Anthocyanins	407000	866000	272000	2310000	3620000	3100000	1.19142	5.84466	2.54712	up
pmb0565	Syringetin 3-O-hexoside	Flavonol	60700	88800	93600	800000	779000	736000	1.35586	9.52283	3.25139	up
pmb0600	Chrysoeriol 7-O-rutinoside	Flavone	9	9	9	4310000	5010000	4780000	3.27723	522222	18.9943	up
pmb0602	Syringetin 7-O-hexoside	Flavone	1870000	1670000	1710000	14800000	16300000	14200000	1.32512	8.62857	3.10912	up
pmb0618	8-C-hexosyl-hesperetin O-hexoside	Flavone	12900000	12500000	14600000	3940000	4110000	3430000	1.00622	0.287	-1.80088	down
pmb0629	Chrysoeriol 6-C-hexoside	Flavone	20300	23900	22700	112000	99200	108000	1.12773	4.7713	2.25438	up
pmb0647	8-C-hexosyl-luteolin O-pentoside	Flavone	9	9	9	20200	18000	29400	2.52229	2503.7	11.2898	up
pmb0653	di-C,C-hexosyl-apigenin	Flavone	47900	36200	41700	505000	452000	494000	1.41233	11.5342	3.52784	up
pmb0835	Gallocatechin-gallocatechin	Polyphenol	59400000	77400000	75600000	15300000	14500000	16800000	1.10646	0.219397	-2.18838	down
pmb2850	Tricin	Flavone	661000	799000	431000	111000	159000	169000	1.06062	0.232152	-2.10686	down
pmb2957	Cyanidin O-syringic acid	Anthocyanins	11900000	23000000	24100000	9	9	9	3.44478	4.57627e-07	-21.0593	down
pmb2975	Hesperetin O-Glucuronic acid	Flavanone	6070	19500	14700	85900	56500	105000	1.19313	6.14353	2.61907	up
pmb3013	Isorhamnetin O-acetyl-hexoside	Flavonol	19000	23100	17700	152000	133000	150000	1.27131	7.27425	2.8628	up
pmb3026	Quercetin O-acetylhexoside	Flavonol	90200	110000	123000	625000	451000	444000	1.11235	4.70297	2.23357	up
pmb3894	Di-O-methylquercetin	Flavonol	826000	756000	644000	138000	151000	160000	1.13829	0.201707	-2.30967	down
pme0205	Catechin	Polyphenol	20900000	22100000	20100000	1620000	1560000	1770000	1.44077	0.0784469	-3.67214	down
pme0324	Chrysin	Flavone	127000	131000	128000	2730	4310	1310	1.78062	0.0216321	-5.53068	down
pme0367	Apigenin 7-rutinoside (Isorhoifolin)	Flavone	7110	11400	6100	52500	33700	50900	1.16869	5.57091	2.47791	up
pme0369	Kaempferol 3-O-rutinoside (Nicotiflorin)	Flavonol	249000	316000	289000	1690000	1490000	1830000	1.19858	5.86651	2.5525	up
pme0372	Naringenin 7-O-glucoside (Prunin)	Flavanone	239000	182000	3740000	9	9	9	2.97567	6.48882e-06	-17.2336	down
pme0442	Delphinidin	Anthocyanins	44000	27600	53200	9	9	9	2.61696	0.000216346	-12.1744	down
pme1201	Phloretin	Flavanone	1330000	1500000	996000	283000	334000	296000	1.06754	0.23863	-2.06715	down
pme1398	Delphinidin 3-O-glucoside (Mirtillin)	Anthocyanins	10700000	12400000	10700000	37400000	37100000	42800000	1.00475	3.47041	1.79511	up
pme1514	Epigallocatechin (EGC)	Polyphenol	11300000	10100000	9590000	2880000	2470000	2730000	1.04451	0.260729	-1.93938	down
pme1535	(+)-Gallocatechin (GC)	Polyphenol	16000000	16800000	15700000	2530000	2290000	2340000	1.24907	0.147629	-2.75995	down
pme1562	Epicatechin gallate (ECG)	Polyphenol	53800000	55100000	51600000	13200000	12700000	13200000	1.07301	0.243614	-2.03733	down
pme1580	Eriodictyol	Flavanone	39700000	34700000	39600000	6260000	7130000	7410000	1.17646	0.182456	-2.45438	down
pme1599	7-O-Methyleriodictyol	Flavanone	12100000	9110000	9030000	1530000	1440000	1780000	1.22216	0.157077	-2.67046	down
pme1605	Kaempferol 3-O-robinobioside (Biorobin)	Flavonol	264000	299000	298000	1570000	1300000	1760000	1.16545	5.37747	2.42693	up
pme1777	Cyanidin 3,5-O-diglucoside (Cyanin)	Anthocyanins	59500000	92400000	71300000	17900000	16400000	19300000	1.06385	0.240143	-2.05803	down
pme2319	Hesperetin	Flavanone	2290000	1770000	2050000	211000	143000	166000	1.41572	0.0851064	-3.55459	down
pme2982	Pinocembrin (Dihydrochrysin)	Flavanone	259000	254000	264000	40000	52600	36000	1.21107	0.165508	-2.59502	down
pme3276	2'-Hydroxygenistein	Isoflavone	6260	2200	5060	13800	30100	18300	1.06836	4.60059	2.20182	up
pme3285	Afzelechin (3,5,7,4'-Tetrahydroxyflavan)	Flavanone	230000	170000	137000	8290	7120	6820	1.60266	0.0413966	-4.59434	down
pme3296	Kaempferol 3-O-rhamnoside (Kaempferin)	Flavonol	3740000	3990000	4350000	16800000	14500000	15100000	1.04548	3.84106	1.9415	up
pme3303	Tricetin	Flavone	1820000	2200000	2310000	306000	330000	349000	1.22854	0.155608	-2.68401	down
pme3369	Rhamnetin (7-O-methxyl quercetin)	Flavonol	19400	12800	25300	83400	175000	116000	1.20519	6.5113	2.70295	up
pme3392	Pelargonidin 3-O-beta-D-glucoside（Callistephin chloride)	Anthocyanins	3490000	3230000	3210000	81700000	79400000	82200000	1.61557	24.5015	4.6148	up
pme3461	Homoeriodictyol	Flavanone	8920000	7320000	8710000	919000	1440000	1310000	1.24761	0.147054	-2.76558	down
pme3484	Myricetin 3-O-galactoside	Flavonol	772000	716000	1030000	5550000	4620000	4420000	1.19313	5.79428	2.53463	up
pmf0012	6,8-di-C-glucoside Apigenine	Flavone	26300	35400	37700	7870	7360	7520	1.08647	0.228873	-2.12738	down
pmf0027	Cyanidin 3-O-galactoside	Anthocyanins	4460000	5690000	5670000	22300000	22500000	24200000	1.09457	4.36157	2.12485	up
pmf0109	3-O-Acetylpinobanksin	Flavonoid	1630000	1930000	1760000	26700	74400	24800	1.76361	0.0236654	-5.40108	down
pmf0115	Galangin	Flavonoid	53500	52300	44000	2120	6890	6840	1.35451	0.105808	-3.24048	down
pmf0216	Catechin gallate，CG	Polyphenol	3110000	3420000	2710000	424000	440000	432000	1.26291	0.14026	-2.83383	down
pmf0238	Theaflavin-3-gallate	Polyphenol	760000	754000	740000	153000	183000	184000	1.09327	0.230701	-2.1159	down
pmf0240	Theaflavin	Polyphenol	782000	723000	753000	147000	181000	177000	1.10434	0.223649	-2.16069	down
pmf0260	Sinensetin	Flavonoid	9	9	9	1540	1710	1460	2.05156	174.444	7.44662	up
pmf0330	Spinosin	Flavonoid	9	9	9	4400	5850	6150	2.28432	607.407	9.24652	up
pmf0361	Astilbin	Flavonoid	814000	946000	784000	186000	260000	268000	1.01166	0.28066	-1.8331	down
pmf0369	Persicoside	Flavonoid	81300	72200	87500	393000	303000	289000	1.06267	4.08714	2.03109	up
pmf0374	Isorhamnetin 3-O-glucoside	Flavonoid	24600000	20200000	26200000	90500000	82500000	93600000	1.03634	3.75493	1.90879	up
pmf0382	5,7-Dihydroxy-3',4',5'-trimethoxyflavone	Flavonoid	57900	63900	76200	9140	4850	6200	1.36321	0.10197	-3.29379	down
pmf0550	Diosmin	Flavonoid	69800	43400	22900	5220000	6220000	5530000	1.99571	124.688	6.96218	up
pmf0615	Petunidin 3, 5-diglucoside	Anthocyanins	25400000	33400000	27100000	7380000	6460000	6300000	1.08153	0.234459	-2.09259	down
