# Supplementary material for: <span aria-describedby="tippy-17">Transcriptomic and Metabolomic Profiling Provides Insights into Flavonoids Biosynthesis and Flower Coloring in <em>Loropetalum chinense</em> and <em>Loropetalum chinense</em> var. <em>rubrum</em>
Source: Preprints.org preprint supplement (doi:10.20944/preprints202304.0456.v1), 2023-04-18
Supplement: Supplementary file 6 [file supplementary table S13.xlsx]

## Sheet: Table S13 
Supplementary table S13 The differentially concentration of flavonoid metabolites analysis in group of XNNC VS XNXY
Index	Compounds	Class	XNNC1	XNNC2	XNNC3	XNXY1	XNXY2	XNXY3	VIP	Fold_Change	LogFC	type
pma0779	Tricin O-rhamnosyl-O-malonylhexoside	Flavone	1790	9890	3630	9	9	9	1.74607	0.00176355	-9.1473	down
pma1116	Kaempferide	Flavonol	403000	642000	229000	9	9	9	2.32417	2.11931e-05	-15.526	down
pma6515	C-hexosyl-chrysin O-feruloylhexoside	Flavone	6480	9000	5660	9	9	9	1.83399	0.0012772	-9.6128	down
pma6639	Isorhamnetin O-hexoside	Flavonol	23600000	22100000	24800000	2450000	2110000	2330000	1.08508	0.0977305	-3.35505	down
pma6647	C-hexosyl-chrysoeriol O-hexoside	Flavone	9	9	9	35200	46000	39100	2.06238	4455.56	12.1214	up
pmb0550	Cyanidin 3-O-glucoside (Kuromanin)	Anthocyanins	112000000	124000000	126000000	5330000	4190000	9470000	1.22609	0.0524586	-4.25268	down
pmb0563	Peonidin	Anthocyanins	407000	866000	272000	9	9	9	2.34105	1.74757e-05	-15.8043	down
pmb0579	Chrysoeriol O-sinapoylhexoside	Flavone	12200	20100	16200	9	9	9	1.94506	0.000556701	-10.8108	down
pmb0588	Luteolin 3',7-di-O-glucoside	Flavone	108000	114000	108000	1660000	1660000	1660000	1.17272	15.0909	3.91561	up
pmb0595	Isorhamnetin 5-O-hexoside	Flavonol	5110000	4270000	4340000	527000	412000	479000	1.07115	0.103353	-3.27435	down
pmb0622	C-hexosyl-luteolin O-hexoside	Flavone	9	9	9	1760	1290	2970	1.64268	222.963	7.80066	up
pmb0628	Eriodictiol C-hexosyl-O-hexoside	Flavone	138000	112000	148000	2480000	2620000	2240000	1.21494	18.4422	4.20494	up
pmb0629	Chrysoeriol 6-C-hexoside	Flavone	20300	23900	22700	9	9	9	1.98954	0.000403587	-11.2748	down
pmb0647	8-C-hexosyl-luteolin O-pentoside	Flavone	9	9	9	20200	18000	14000	1.95618	1933.33	10.9169	up
pmb0653	di-C,C-hexosyl-apigenin	Flavone	47900	36200	41700	9	9	9	2.06785	0.000214626	-12.1859	down
pmb0665	Luteolin 8-C-hexosyl-O-hexoside	Flavone	154000	172000	155000	2180000	1930000	2090000	1.1377	12.8898	3.68816	up
pmb0696	8-C-hexosyl chrysoeriol O-hexoside	Flavone	26400000	22500000	23500000	9	9	9	2.73842	3.72928e-07	-21.3546	down
pmb0711	Quercetin 7-O-rutinoside	Flavonol	4970000	5820000	4650000	42500000	41100000	43500000	1.03344	8.23187	3.04122	up
pmb0713	Tricin 7-O-hexosyl-O-hexoside	Flavone	980000	709000	1060000	9	9	9	2.41536	9.82175e-06	-16.6356	down
pmb0739	Tricin O-hexosyl-O-syringin alcohol	Flavone	8130	7500	7870	221000	232000	222000	1.3043	28.7234	4.84415	up
pmb0835	Gallocatechin-gallocatechin	Polyphenol	59400000	77400000	75600000	597000	489000	445000	1.58002	0.0072081	-7.11617	down
pmb2957	Cyanidin O-syringic acid	Anthocyanins	11900000	23000000	24100000	149000	122000	307000	1.52723	0.00979661	-6.6735	down
pmb2975	Hesperetin O-Glucuronic acid	Flavanone	6070	19500	14700	9	9	9	1.90489	0.000670474	-10.5425	down
pmb2992	Acacetin O-glucuronic acid	Flavone	23400	40000	25200	9	9	9	2.02081	0.00030474	-11.6801	down
pme0197	Quercetin 3-O-rutinoside (Rutin)	Flavonol	1060000	1050000	929000	14100000	12900000	12600000	1.14008	13.0306	3.70383	up
pme0324	Chrysin	Flavone	127000	131000	128000	6660	6500	4140	1.25591	0.0448187	-4.47976	down
pme0367	Apigenin 7-rutinoside (Isorhoifolin)	Flavone	7110	11400	6100	9	9	9	1.85185	0.00109711	-9.83207	down
pme0369	Kaempferol 3-O-rutinoside (Nicotiflorin)	Flavonol	249000	316000	289000	5790000	5750000	5170000	1.22745	19.5667	4.29033	up
pme0372	Naringenin 7-O-glucoside (Prunin)	Flavanone	239000	182000	3740000	14100000	8520000	15800000	1.15787	9.23336	3.20686	up
pme1398	Delphinidin 3-O-glucoside (Mirtillin)	Anthocyanins	10700000	12400000	10700000	231000	153000	301000	1.408	0.0202663	-5.62478	down
pme1599	7-O-Methyleriodictyol	Flavanone	12100000	9110000	9030000	645000	602000	638000	1.18256	0.0623347	-4.00382	down
pme1605	Kaempferol 3-O-robinobioside (Biorobin)	Flavonol	264000	299000	298000	6060000	5830000	5380000	1.23237	20.0581	4.32611	up
pme1777	Cyanidin 3,5-O-diglucoside (Cyanin)	Anthocyanins	59500000	92400000	71300000	444000	381000	345000	1.62812	0.00524194	-7.57568	down
pme1793	Pelargonin	Anthocyanins	5940000	5400000	5130000	93500	122000	97100	1.41752	0.01898	-5.71938	down
pme2319	Hesperetin	Flavanone	2290000	1770000	2050000	77000	72600	67900	1.2985	0.0355974	-4.81209	down
pme2982	Pinocembrin (Dihydrochrysin)	Flavanone	259000	254000	264000	18500	17400	15300	1.17407	0.0658945	-3.9237	down
pme3208	Glycitin	Isoflavone	9	9	9	10200	8180	7900	1.86603	973.333	9.92679	up
pme3285	Afzelechin (3,5,7,4'-Tetrahydroxyflavan)	Flavanone	230000	170000	137000	9540	10600	6820	1.22487	0.0502048	-4.31603	down
pme3296	Kaempferol 3-O-rhamnoside (Kaempferin)	Flavonol	3740000	3990000	4350000	31900000	30000000	31100000	1.0169	7.69868	2.94461	up
pme3391	Petunidin 3-O-glucoside	Anthocyanins	1590000	1990000	1450000	9	9	9	2.47863	5.36779e-06	-17.5072	down
pme3392	Pelargonidin 3-O-beta-D-glucoside（Callistephin chloride)	Anthocyanins	3490000	3230000	3210000	92300	82400	113000	1.34006	0.0289728	-5.10916	down
pme3484	Myricetin 3-O-galactoside	Flavonol	772000	716000	1030000	8230000	8430000	8520000	1.08074	10	3.32193	up
pmf0011	Apigenin 6,8-C-diglucoside	Flavone	2430	4040	3400	9	9	9	1.72482	0.00273556	-8.51395	down
pmf0027	Cyanidin 3-O-galactoside	Anthocyanins	4460000	5690000	5670000	146000	140000	283000	1.30059	0.0359671	-4.79718	down
pmf0109	3-O-Acetylpinobanksin	Flavonoid	1630000	1930000	1760000	104000	113000	64200	1.22158	0.0528571	-4.24176	down
pmf0238	Theaflavin-3-gallate	Polyphenol	760000	754000	740000	67000	55200	71700	1.11508	0.0860248	-3.5391	down
pmf0240	Theaflavin	Polyphenol	782000	723000	753000	67900	57900	66900	1.11661	0.085341	-3.55062	down
pmf0260	Sinensetin	Flavonoid	9	9	9	2440	2050	4480	1.70369	332.222	8.376	up
pmf0330	Spinosin	Flavonoid	9	9	9	20400	21600	28700	1.99521	2618.52	11.3545	up
pmf0374	Isorhamnetin 3-O-glucoside	Flavonoid	24600000	20200000	26200000	1910000	1780000	2010000	1.12807	0.0802817	-3.63879	down
pmf0382	5,7-Dihydroxy-3',4',5'-trimethoxyflavone	Flavonoid	57900	63900	76200	7000	6020	6160	1.08473	0.0968687	-3.36783	down
pmf0472	Apiin	Flavonoid	7840	9020	6140	9	9	9	1.84688	0.00117391	-9.73446	down
pmf0567	Tectorigenin	Flavonoid	5040	3810	5400	2160	9	9	1.3163	0.152842	-2.70989	down
pmf0615	Petunidin 3, 5-diglucoside	Anthocyanins	25400000	33400000	27100000	122000	72600	102000	1.69548	0.00345285	-8.178	down
pmf0616	Malvidin 3-acetyl-5-diglucoside	Anthocyanins	28900	45400	45000	9	9	9	2.0589	0.00022632	-12.1093	down
pmf0617	Peonidin 3-sophoroside-5-glucoside.	Anthocyanins	78800	105000	67900	9	9	9	2.14969	0.000107271	-13.1865	down
