# Supplementary material for: <span aria-describedby="tippy-17">Transcriptomic and Metabolomic Profiling Provides Insights into Flavonoids Biosynthesis and Flower Coloring in <em>Loropetalum chinense</em> and <em>Loropetalum chinense</em> var. <em>rubrum</em>
Source: Preprints.org preprint supplement (doi:10.20944/preprints202304.0456.v1), 2023-04-18
Supplement: Supplementary file 7 [file supplementary table S14.xlsx]

## Sheet: Table S14 
Supplementary table S14 The differentially concentration of flavonoid metabolites analysis in group of XNFJ VS XNXY
Index	Compounds	Class	XNFJ1	XNFJ2	XNFJ3	XNXY1	XNXY2	XNXY3	VIP	Fold_Change	LogFC	type
pma0253	O-methylChrysoeriol 5-O-hexoside	Flavone	38000	29300	21800	396000	226000	248000	1.01777	9.76431	3.28752	up
pma0760	Selgin O-malonylhexoside	Flavone	119000	129000	125000	5640	4530	5340	1.21687	0.0415818	-4.58791	down
pma0779	Tricin O-rhamnosyl-O-malonylhexoside	Flavone	4080	7910	5130	9	9	9	1.72639	0.0015771	-9.30851	down
pma1116	Kaempferide	Flavonol	2370000	2880000	2170000	9	9	9	2.41383	3.63881e-06	-18.0681	down
pma6515	C-hexosyl-chrysin O-feruloylhexoside	Flavone	8500	11100	7650	9	9	9	1.7924	0.000990826	-9.97908	down
pma6576	Spinacetin	Flavone	315000	174000	163000	11700	12700	10100	1.15476	0.0529141	-4.2402	down
pma6639	Isorhamnetin O-hexoside	Flavonol	46000000	47000000	44200000	2450000	2110000	2330000	1.18011	0.0502187	-4.31563	down
pma6647	C-hexosyl-chrysoeriol O-hexoside	Flavone	9	9	9	35200	46000	39100	1.97685	4455.56	12.1214	up
pmb0550	Cyanidin 3-O-glucoside (Kuromanin)	Anthocyanins	196000000	199000000	211000000	5330000	4190000	9470000	1.27464	0.0313366	-4.99601	down
pmb0563	Peonidin	Anthocyanins	2310000	3620000	3100000	9	9	9	2.4316	2.99003e-06	-18.3514	down
pmb0565	Syringetin 3-O-hexoside	Flavonol	800000	779000	736000	12300	12500	9540	1.40061	0.0148337	-6.07498	down
pmb0579	Chrysoeriol O-sinapoylhexoside	Flavone	50200	35900	53200	9	9	9	1.99282	0.000193826	-12.3329	down
pmb0595	Isorhamnetin 5-O-hexoside	Flavonol	7590000	9440000	8280000	527000	412000	479000	1.15725	0.0560253	-4.15778	down
pmb0600	Chrysoeriol 7-O-rutinoside	Flavone	4310000	5010000	4780000	9	9	9	2.47553	1.91489e-06	-18.9943	down
pmb0602	Syringetin 7-O-hexoside	Flavone	14800000	16300000	14200000	687000	600000	757000	1.20079	0.0451214	-4.47004	down
pmb0622	C-hexosyl-luteolin O-hexoside	Flavone	9	9	9	1760	1290	2970	1.57445	222.963	7.80066	up
pmb0629	Chrysoeriol 6-C-hexoside	Flavone	112000	99200	108000	9	9	9	2.08926	8.45865e-05	-13.5292	down
pmb0653	di-C,C-hexosyl-apigenin	Flavone	505000	452000	494000	9	9	9	2.25167	1.86079e-05	-15.7137	down
pmb0665	Luteolin 8-C-hexosyl-O-hexoside	Flavone	189000	220000	182000	2180000	1930000	2090000	1.04566	10.4907	3.39104	up
pmb0696	8-C-hexosyl chrysoeriol O-hexoside	Flavone	35800000	66200000	47500000	9	9	9	2.6855	1.80602e-07	-22.4007	down
pmb0713	Tricin 7-O-hexosyl-O-hexoside	Flavone	1820000	1920000	1750000	9	9	9	2.38532	4.91803e-06	-17.6335	down
pmb0739	Tricin O-hexosyl-O-syringin alcohol	Flavone	13600	8020	7980	221000	232000	222000	1.20901	22.8041	4.51122	up
pmb0835	Gallocatechin-gallocatechin	Polyphenol	15300000	14500000	16800000	597000	489000	445000	1.26106	0.0328541	-4.92778	down
pmb2957	Cyanidin O-syringic acid	Anthocyanins	9	9	9	149000	122000	307000	2.1439	21407.4	14.3858	up
pmb2975	Hesperetin O-Glucuronic acid	Flavanone	85900	56500	105000	9	9	9	2.0564	0.000109135	-13.1616	down
pmb2992	Acacetin O-glucuronic acid	Flavone	27500	23300	32400	9	9	9	1.93248	0.000324519	-11.5894	down
pmb3013	Isorhamnetin O-acetyl-hexoside	Flavonol	152000	133000	150000	5950	7850	9560	1.16734	0.0537011	-4.2189	down
pme0367	Apigenin 7-rutinoside (Isorhoifolin)	Flavone	52500	33700	50900	9	9	9	1.99023	0.000196937	-12.31	down
pme0372	Naringenin 7-O-glucoside (Prunin)	Flavanone	9	9	9	14100000	8520000	15800000	2.56473	1.42296e+06	20.4405	up
pme0442	Delphinidin	Anthocyanins	9	9	9	201000	318000	191000	2.17318	26296.3	14.6826	up
pme1398	Delphinidin 3-O-glucoside (Mirtillin)	Anthocyanins	37400000	37100000	42800000	231000	153000	301000	1.55029	0.00583973	-7.41988	down
pme1777	Cyanidin 3,5-O-diglucoside (Cyanin)	Anthocyanins	17900000	16400000	19300000	444000	381000	345000	1.33422	0.0218284	-5.51765	down
pme1793	Pelargonin	Anthocyanins	17700000	17800000	18700000	93500	122000	97100	1.54982	0.00576753	-7.43783	down
pme3208	Glycitin	Isoflavone	9	9	9	10200	8180	7900	1.78867	973.333	9.92679	up
pme3303	Tricetin	Flavone	306000	330000	349000	5870000	5910000	4630000	1.14224	16.6599	4.05831	up
pme3391	Petunidin 3-O-glucoside	Anthocyanins	5470000	5140000	4850000	9	9	9	2.48425	1.74644e-06	-19.1271	down
pme3392	Pelargonidin 3-O-beta-D-glucoside（Callistephin chloride)	Anthocyanins	81700000	79400000	82200000	92300	82400	113000	1.77217	0.00118249	-9.72396	down
pmf0011	Apigenin 6,8-C-diglucoside	Flavone	3320	2670	3520	9	9	9	1.65097	0.00283912	-8.46034	down
pmf0027	Cyanidin 3-O-galactoside	Anthocyanins	22300000	22500000	24200000	146000	140000	283000	1.49964	0.00824638	-6.92202	down
pmf0361	Astilbin	Flavonoid	186000	260000	268000	2070000	2210000	1970000	1.00464	8.7535	3.12986	up
pmf0369	Persicoside	Flavonoid	393000	303000	289000	13500	9500	13400	1.23721	0.0369543	-4.75811	down
pmf0374	Isorhamnetin 3-O-glucoside	Flavonoid	90500000	82500000	93600000	1910000	1780000	2010000	1.33768	0.0213803	-5.54757	down
pmf0472	Apiin	Flavonoid	5160	4290	7270	9	9	9	1.72566	0.00161483	-9.2744	down
pmf0550	Diosmin	Flavonoid	5220000	6220000	5530000	53900	53800	9	1.66977	0.00634702	-7.2997	down
pmf0567	Tectorigenin	Flavonoid	2640	3650	1650	2160	9	9	1.12846	0.274307	-1.86614	down
pmf0615	Petunidin 3, 5-diglucoside	Anthocyanins	7380000	6460000	6300000	122000	72600	102000	1.40265	0.0147269	-6.0854	down
pmf0616	Malvidin 3-acetyl-5-diglucoside	Anthocyanins	10800	15100	14500	9	9	9	1.84311	0.000668317	-10.5472	down
pmf0617	Peonidin 3-sophoroside-5-glucoside.	Anthocyanins	79800	63300	59100	9	9	9	2.03676	0.000133531	-12.8705	down
