# Supplementary material for: <span aria-describedby="tippy-17">Transcriptomic and Metabolomic Profiling Provides Insights into Flavonoids Biosynthesis and Flower Coloring in <em>Loropetalum chinense</em> and <em>Loropetalum chinense</em> var. <em>rubrum</em>
Source: Preprints.org preprint supplement (doi:10.20944/preprints202304.0456.v1), 2023-04-18
Supplement: Supplementary file 8 [file supplementary table S15.xlsx]

## Sheet: Table S15 
Supplementary table S15 The compared transcriptome of LDPF VS XNNC on KEGG metabolic pathway annotation
Pathway	ko_ID	Unique compound	compound	Uni_all	compound_all	Index	KEGG pathway
Flavonoid biosynthesis	ko00941	15	36	26	92	pme2982;pme3461;pme2954;pme1521;pme0324;pme3285;pme2319;pmf0057;pme0442;pme1580;pme3464;pmf0115;pmf0058;pme3609;pme0205	C09827+C09756+C00389+C01617+C10028+C09320+C01709+C06561+C05908+C05631+C05334+C10044+C00509+C05905+C06562
Biosynthesis of phenylpropanoids	ko01061	5	14	26	92	pmf0057;pme1521;pme3609;pme0205;pmf0058	C06561+C01617+C05905+C06562+C00509
Biosynthesis of secondary metabolites	ko01110	10	32	26	92	pme0442;pmf0057;pme1580;pme1521;pme2954;pme3609;pme0205;pme3464;pmf0058;pme3285	C05908+C06561+C05631+C01617+C00389+C05905+C06562+C05334+C00509+C09320
Anthocyanin biosynthesis	ko00942	3	8	26	92	pme3609;pme1398;pme0442	C05905+C12138+C05908
Metabolic pathways	ko01100	6	16	26	92	pme3609;pmf0058;pmf0057;pme1580;pme2954;pme1521	C05905+C00509+C06561+C05631+C00389+C01617
Flavone and flavonol biosynthesis	ko00944	4	21	26	92	pme3296;pme2954;pme1624;pmf0472	C16911+C00389+C01714+C04858
AMPK signaling pathway	ko04152	1	2	26	92	pme2954	C00389
Isoflavonoid biosynthesis	ko00943	1	9	26	92	pmf0058	C00509
