# Supplementary material for: <span aria-describedby="tippy-17">Transcriptomic and Metabolomic Profiling Provides Insights into Flavonoids Biosynthesis and Flower Coloring in <em>Loropetalum chinense</em> and <em>Loropetalum chinense</em> var. <em>rubrum</em>
Source: Preprints.org preprint supplement (doi:10.20944/preprints202304.0456.v1), 2023-04-18
Supplement: Supplementary file 10 [file supplementary table S17.xlsx]

## Sheet: Table S17 
Supplementary table S17 The compared transcriptome of LDPF VS XNXY on KEGG metabolic pathway annotation
Pathway	ko_ID	Unique compound	compound	Uni_all	compound_all	Index	KEGG pathway
Flavone and flavonol biosynthesis	ko00944	4	20	20	92	pme2954;pme0197;pma1116;pme0200	C00389+C05625+C10098+C05903
Anthocyanin biosynthesis	ko00942	6	8	20	92	pme3391;pme1793;pme1777;pmb0550;pme1398;pme3609	C12139+C08725+C08639+C08604+C12138+C05905
Metabolic pathways	ko01100	5	16	20	92	pme0200;pme1580;pme3609;pme0197;pme2954	C05903+C05631+C05905+C05625+C00389
Biosynthesis of secondary metabolites	ko01110	8	32	20	92	pme3609;pme1580;pme0200;pme2954;pme3285;pme0205;pmf0344;pme0197	C05905+C05631+C05903+C00389+C09320+C06562+C12128+C05625
Flavonoid biosynthesis	ko00941	9	36	20	92	pme3285;pme2954;pme1580;pme0200;pme0372;pme3609;pmf0344;pme0205;pme3461	C09320+C00389+C05631+C05903+C09099+C05905+C12128+C06562+C09756
Biosynthesis of phenylpropanoids	ko01061	3	14	20	92	pme0205;pme3609;pme0200	C06562+C05905+C05903
AMPK signaling pathway	ko04152	1	2	20	92	pme2954	C00389
Isoflavonoid biosynthesis	ko00943	1	10	20	92	pme3208	C16195
