# Supplementary material for: <span aria-describedby="tippy-17">Transcriptomic and Metabolomic Profiling Provides Insights into Flavonoids Biosynthesis and Flower Coloring in <em>Loropetalum chinense</em> and <em>Loropetalum chinense</em> var. <em>rubrum</em>
Source: Preprints.org preprint supplement (doi:10.20944/preprints202304.0456.v1), 2023-04-18
Supplement: Supplementary file 11 [file supplementary table S18.xlsx]

## Sheet: Table S18 
Supplementary table S18 The compared transcriptome of XNNC VS XNFJ on KEGG metabolic pathway annotation
Pathway	ko_ID	Unique compound	compound	Uni_all	compound_all	Index	KEGG pathway
Flavone and flavonol biosynthesis	ko00944	2	21	27	91	pme3296;pma1116	C16911+C10098
Flavonoid biosynthesis	ko00941	14	35	27	91	pme1201;pme2982;pme3285;pme0372;pme3303;pme0205;pme1514;pme1580;pmf0115;pme2319;pme1535;pme3461;pme0324;pme0442	C00774+C09827+C09320+C09099+C10192+C06562+C12136+C05631+C10044+C01709+C12127+C09756+C10028+C05908
Biosynthesis of phenylpropanoids	ko01061	1	13	27	91	pme0205	C06562
Biosynthesis of secondary metabolites	ko01110	7	31	27	91	pme1514;pme0205;pme1580;pme1201;pme3285;pme1535;pme0442	C12136+C06562+C05631+C00774+C09320+C12127+C05908
Anthocyanin biosynthesis	ko00942	3	7	27	91	pme1777;pme1398;pme0442	C08639+C12138+C05908
Metabolic pathways	ko01100	1	15	27	91	pme1580	C05631
Isoflavonoid biosynthesis	ko00943	1	9	27	91	pme3276	C12134
