# Supplementary material for: <span aria-describedby="tippy-17">Transcriptomic and Metabolomic Profiling Provides Insights into Flavonoids Biosynthesis and Flower Coloring in <em>Loropetalum chinense</em> and <em>Loropetalum chinense</em> var. <em>rubrum</em>
Source: Preprints.org preprint supplement (doi:10.20944/preprints202304.0456.v1), 2023-04-18
Supplement: Supplementary file 12 [file supplementary table S19.xlsx]

## Sheet: Table S19 
Supplementary table S19 The compared transcriptome of XNNC VS XNXY on KEGG metabolic pathway annotation
Pathway	ko_ID	Unique compound	compound	Uni_all	compound_all	Index	KEGG pathway
Flavone and flavonol biosynthesis	ko00944	4	21	21	92	pme0197;pma1116;pme3296;pmf0472	C05625+C10098+C16911+C04858
Anthocyanin biosynthesis	ko00942	5	7	21	92	pme1777;pmb0550;pme1793;pme3391;pme1398	C08639+C08604+C08725+C12139+C12138
Metabolic pathways	ko01100	1	15	21	92	pme0197	C05625
Biosynthesis of secondary metabolites	ko01110	2	31	21	92	pme3285;pme0197	C09320+C05625
Flavonoid biosynthesis	ko00941	5	35	21	92	pme0324;pme3285;pme0372;pme2982;pme2319	C10028+C09320+C09099+C09827+C01709
Isoflavonoid biosynthesis	ko00943	1	10	21	92	pme3208	C16195
