# Supplementary material for: <span aria-describedby="tippy-17">Transcriptomic and Metabolomic Profiling Provides Insights into Flavonoids Biosynthesis and Flower Coloring in <em>Loropetalum chinense</em> and <em>Loropetalum chinense</em> var. <em>rubrum</em>
Source: Preprints.org preprint supplement (doi:10.20944/preprints202304.0456.v1), 2023-04-18
Supplement: Supplementary file 13 [file supplementary table S2.xlsx]

## Sheet: Table S2 
Supplementary Table S2 The differential accumulated metabolites in group of LDPF VS XNNC
Index	Compounds	Class	LDPF1	LDPF2	LDPF3	XNNC1	XNNC2	XNNC3	VIP	Fold_Change	LogFC
pme3609	Cyanidin	Anthocyanins	146000	111000	97100	9	9	9	2.51846	7.62496e-05	-13.6789
pme0442	Delphinidin	Anthocyanins	282000	189000	290000	44000	27600	53200	1.08919	0.163995	-2.60828
pme1398	Delphinidin 3-O-glucoside (Mirtillin)	Anthocyanins	56000000	45600000	51000000	10700000	12400000	10700000	1.00218	0.221494	-2.17466
pme3391	Petunidin 3-O-glucoside	Anthocyanins	4440000	4120000	6800000	1590000	1990000	1450000	0.836327	0.327474	-1.61055
pmf0027	Cyanidin 3-O-galactoside	Anthocyanins	9470000	7880000	10400000	4460000	5690000	5670000	0.591449	0.57009	-0.810738
pme3392	Pelargonidin 3-O-beta-D-glucoside（Callistephin chloride)	Anthocyanins	5370000	4710000	5960000	3490000	3230000	3210000	0.552	0.619077	-0.691809
pmb0550	Cyanidin 3-O-glucoside (Kuromanin)	Anthocyanins	179000000	174000000	177000000	112000000	124000000	126000000	0.501985	0.683019	-0.550003
pmb2957	Cyanidin O-syringic acid	Anthocyanins	23900000	17700000	26200000	11900000	23000000	24100000	0.195206	0.870206	-0.20057
pme1773	Cyanidin 3-O-rutinoside (Keracyanin)	Anthocyanins	91100	100000	76700	191000	149000	153000	0.620703	1.84093	0.880432
pmf0615	Petunidin 3, 5-diglucoside	Anthocyanins	11300000	9970000	10800000	25400000	33400000	27100000	0.803431	2.67852	1.42143
pme1793	Pelargonin	Anthocyanins	1660000	1400000	1890000	5940000	5400000	5130000	0.894056	3.32727	1.73434
pme1777	Cyanidin 3,5-O-diglucoside (Cyanin)	Anthocyanins	22700000	16900000	25600000	59500000	92400000	71300000	0.888965	3.42331	1.77539
pmb0563	Peonidin	Anthocyanins	164000	92000	99700	407000	866000	272000	0.901995	4.34355	2.11887
pmf0617	Peonidin 3-sophoroside-5-glucoside.	Anthocyanins	5010	3380	3800	78800	105000	67900	1.41938	20.6481	4.36794
pmf0616	Malvidin 3-acetyl-5-diglucoside	Anthocyanins	9	9	9	28900	45400	45000	2.36767	4418.52	12.1093
pmb2975	Hesperetin O-Glucuronic acid	Flavanone	41600	28300	44500	6070	19500	14700	0.79732	0.35201	-1.50631
pme1598	Hesperetin 5-O-glucoside	Flavanone	3140000	2960000	2720000	1160000	1240000	1330000	0.756449	0.422902	-1.2416
pmc1990	4'-Hydroxy-5,7-dimethoxyflavanone	Flavanone	2140000	2060000	2100000	1590000	1640000	1730000	0.396394	0.787302	-0.345012
pme2984	Isosakuranetin-7-neohesperidoside (Poncirin)	Flavanone	6410000	6520000	6900000	5460000	5120000	5730000	0.349544	0.822491	-0.281928
pme0372	Naringenin 7-O-glucoside (Prunin)	Flavanone	3790000	167000	9	239000	182000	3740000	0.944704	1.05155	0.0725199
pme0376	Naringenin	Flavanone	819000	742000	750000	1140000	1210000	1370000	0.553356	1.60969	0.686785
pme2957	Naringenin chalcone	Flavanone	1380000	1230000	1200000	1940000	2090000	2330000	0.574567	1.66929	0.739236
pme3215	Isoliquiritigenin	Flavanone	3970	4350	3520	7830	8170	6900	0.656955	1.93412	0.951679
pme1201	Phloretin	Flavanone	295000	349000	342000	1330000	1500000	996000	0.941219	3.88032	1.95618
pme0001	Hesperetin 7-O-neohesperidoside (Neohesperidin)	Flavanone	226000	450000	176000	950000	1390000	1100000	0.953706	4.03756	2.01348
pmf0058	4',5,7-Trihydroxyflavanone	Flavanone	981000	891000	965000	4330000	4320000	4070000	1.00241	4.48361	2.16466
pme2949	Hesperetin 7-rutinoside (Hesperidin)	Flavanone	243000	273000	170000	685000	1260000	1150000	0.975719	4.51166	2.17366
pme2982	Pinocembrin (Dihydrochrysin)	Flavanone	32800	22400	56600	259000	254000	264000	1.14056	6.94991	2.79699
pme3464	Isosakuranetin (4'-Methylnaringenin)	Flavanone	146000	29400	41900	481000	603000	432000	1.15319	6.97653	2.80251
pmb2979	Hesperetin O-malonylhexoside	Flavanone	111000	104000	85100	1230000	1570000	1320000	1.32299	13.7288	3.77913
pme1580	Eriodictyol	Flavanone	1980000	1120000	1610000	39700000	34700000	39600000	1.4624	24.2038	4.59716
pme3461	Homoeriodictyol	Flavanone	264000	269000	105000	8920000	7320000	8710000	1.57378	39.1066	5.28934
pme1599	7-O-Methyleriodictyol	Flavanone	359000	149000	186000	12100000	9110000	9030000	1.59515	43.5735	5.44538
pme2319	Hesperetin	Flavanone	27400	17100	21900	2290000	1770000	2050000	1.74107	92.0181	6.52385
pme3285	Afzelechin (3,5,7,4'-Tetrahydroxyflavan)	Flavanone	9	9	9	230000	170000	137000	2.5724	19888.9	14.2797
pma6647	C-hexosyl-chrysoeriol O-hexoside	Flavone	15400	16700	11500	9	9	9	2.2225	0.000619266	-10.6572
pmb0647	8-C-hexosyl-luteolin O-pentoside	Flavone	13200	7900	13400	9	9	9	2.18408	0.000782609	-10.3194
pmb0739	Tricin O-hexosyl-O-syringin alcohol	Flavone	135000	136000	205000	8130	7500	7870	1.41236	0.0493697	-4.34023
pmb0628	Eriodictiol C-hexosyl-O-hexoside	Flavone	1830000	1780000	1890000	138000	112000	148000	1.32718	0.0723636	-3.78859
pma6576	Spinacetin	Flavone	207000	189000	188000	33900	14800	21000	1.1946	0.119349	-3.06674
pmb0588	Luteolin 3',7-di-O-glucoside	Flavone	799000	724000	737000	108000	114000	108000	1.135	0.146018	-2.77578
pmb0602	Syringetin 7-O-hexoside	Flavone	12000000	10500000	11300000	1870000	1670000	1710000	1.11618	0.155325	-2.68663
pmb0725	Tricin 7-O-feruloylhexoside	Flavone	10900	11200	10300	2560	2400	2110	1.00874	0.21821	-2.19621
pmb0624	6-C-hexosyl-luteolin O-hexoside	Flavone	60700	59800	76200	15000	13400	14600	1.00468	0.218607	-2.19359
pmb3047	Tricin 4'-O-(syringyl alcohol) ether 5-O-hexoside	Flavone	97900	93400	88900	22600	27400	30900	0.910667	0.288722	-1.79225
pmb3006	Apigenin 7-O-glucoside (Cosmosiin)	Flavone	67400	66100	51200	17900	28500	26900	0.768733	0.39686	-1.3333
pmb3037	Tricin O-malonyl shikimic acid	Flavone	4560	5350	6380	1480	3400	1600	0.757213	0.39779	-1.32992
pme3509	7,4'-Dihydroxyflavone	Flavone	42200	50700	60200	19300	24500	21900	0.735099	0.429131	-1.22051
pmb0618	8-C-hexosyl-hesperetin O-hexoside	Flavone	30500000	33200000	27800000	12900000	12500000	14600000	0.73961	0.437158	-1.19377
pmb0580	Chrysin 5-O-glucoside (Toringin)	Flavone	517000	472000	574000	223000	261000	268000	0.692713	0.481126	-1.05551
pmb3023	Eriodictyol C-hexoside	Flavone	4540000	4330000	4690000	2250000	2300000	2700000	0.643895	0.534661	-0.903304
pme1611	Isohemiphloin	Flavone	439000	335000	384000	192000	261000	279000	0.519045	0.632124	-0.66172
pmb0645	6-C-hexosyl-hesperetin O-hexoside	Flavone	7210000	7100000	7750000	4670000	4640000	4800000	0.544822	0.639619	-0.644715
pme2457	Luteolin 7-O-glucoside (Cynaroside)	Flavone	113000	132000	143000	75200	92900	81800	0.520656	0.644072	-0.634706
pme3303	Tricetin	Flavone	2620000	3470000	2990000	1820000	2200000	2310000	0.454194	0.697137	-0.520487
pmb3046	Tricin 7-O-hexoside	Flavone	29900	24300	26500	21500	24300	16100	0.361609	0.767038	-0.382629
pmb0576	Apigenin O-malonylhexoside	Flavone	18000	15400	15100	10500	15800	12900	0.312971	0.808247	-0.307131
pme0208	Amentoflavone	Flavone	82300	71900	47600	69300	45700	54300	0.202231	0.838949	-0.253344
pmb0746	Tricin 4'-O-β-guaiacylglycerol	Flavone	5090	5240	5580	4120	4670	5570	0.195865	0.902577	-0.147878
pmb0689	Chrysoeriol C-hexoside	Flavone	13800	12800	12200	8490	15500	17700	0.0286266	1.07448	0.103645
pmb0724	Tricin O-rhamnoside	Flavone	388000	389000	342000	394000	425000	451000	0.249971	1.13494	0.182618
pmb3041	Tricin O-saccharic acid	Flavone	1250000	1320000	1090000	1440000	1520000	1400000	0.31316	1.19126	0.252484
pme1518	Nobiletin	Flavone	28100	19800	16700	44300	19000	19600	0.194536	1.28328	0.359838
pmf0012	6,8-di-C-glucoside Apigenine	Flavone	27600	25100	20900	26300	35400	37700	0.378876	1.35054	0.43354
pme1541	Acacetin	Flavone	101000	43000	57900	92400	117000	75600	0.388766	1.41159	0.497321
pma6558	Velutin	Flavone	27200	33600	27100	43800	30500	50200	0.396633	1.41638	0.502211
pmb2987	Acacetin O-acetyl hexoside	Flavone	35600	34300	39600	47300	68800	44800	0.442679	1.46941	0.555233
pme1550	Tangeretin	Flavone	18500	10500	8060	30100	12900	13100	0.352156	1.51376	0.598138
pme1510	Baicalein (5,6,7-Trihydroxyflavone)	Flavone	20500	9760	6480	19700	21900	17000	0.498639	1.59499	0.673549
pmb2999	Chrysoeriol 5-O-hexoside	Flavone	51200	79600	79000	104000	97500	134000	0.509052	1.59914	0.677298
pmf0011	Apigenin 6,8-C-diglucoside	Flavone	2260	1970	1790	2430	4040	3400	0.512743	1.63953	0.713287
pmb0732	Tricin 5-O-feruloylhexoside	Flavone	17500	22000	16200	28800	33900	29000	0.558748	1.64632	0.719244
pmb0566	Luteolin O-hexosyl-O-pentoside	Flavone	59400	57600	49600	78500	123000	78800	0.532405	1.68247	0.750583
pme0379	Apigenin	Flavone	49300	41500	29900	65100	79600	61700	0.563081	1.71002	0.774017
pme3473	Butin	Flavone	1220000	1290000	1230000	2040000	2210000	2260000	0.606364	1.74064	0.799619
pmb0629	Chrysoeriol 6-C-hexoside	Flavone	11400	11000	15500	20300	23900	22700	0.598073	1.76517	0.819808
pma0760	Selgin O-malonylhexoside	Flavone	19900	14800	17500	38100	35900	30000	0.664488	1.99234	0.994462
pmb0663	8-C-hexosyl-luteolin O-hexoside	Flavone	52100	41800	34500	86100	98000	95800	0.710897	2.17991	1.12427
pme0363	Chrysoeriol	Flavone	152000	22700	29400	176000	183000	136000	0.778212	2.42528	1.27815
pmb2983	Chrysoeriol C-pentosyl-O-rhamnosyl-rhamnoside	Flavone	1250	1160	1090	2680	3810	3620	0.828473	2.88857	1.53036
pma6218	O-methylnaringenin C-pentoside	Flavone	17300	20600	15000	59900	55000	38700	0.824615	2.90359	1.53784
pmb0665	Luteolin 8-C-hexosyl-O-hexoside	Flavone	48400	61500	53200	154000	172000	155000	0.848729	2.94911	1.56028
pme0333	Apigenin 7-O-neohesperidoside (Rhoifolin)	Flavone	67700	67500	48700	218000	177000	192000	0.875373	3.19195	1.67444
pmb0660	C-hexosyl-luteolin O-p-coumaroylhexoside	Flavone	8760	5850	7970	24500	31600	17900	0.862947	3.27724	1.71248
pma6638	O-methylChrysoeriol 7-O-hexoside	Flavone	27100	22400	12700	84900	56300	64000	0.871149	3.29904	1.72204
pmb0592	Chrysoeriol O-hexosyl-O-rutinoside	Flavone	27600	28100	27000	79900	96200	114000	0.906293	3.50786	1.81059
pme0088	Luteolin	Flavone	98500	79400	64300	311000	289000	273000	0.923152	3.60446	1.84978
pme1662	sakuranetin	Flavone	6810	6930	4220	34100	15600	18000	0.889603	3.76949	1.91437
pmb0696	8-C-hexosyl chrysoeriol O-hexoside	Flavone	7190000	4340000	6020000	26400000	22500000	23500000	0.969556	4.12536	2.04452
pma0253	O-methylChrysoeriol 5-O-hexoside	Flavone	19900	21400	8610	88900	60800	63700	0.968685	4.2757	2.09616
pmf0057	4,2',4',6'-Tetrahydroxychalcone	Flavone	867000	792000	842000	3810000	4040000	3630000	1.00987	4.59016	2.19855
pmb3014	Luteolin O-eudesmic acid-O-hexoside	Flavone	13100	9980	9950	44600	61400	54200	1.02138	4.85014	2.27803
pma6496	Luteolin 6-C-glucoside	Flavone	5000	9	9	9780	9520	6440	1.53753	5.12953	2.35883
pmb0713	Tricin 7-O-hexosyl-O-hexoside	Flavone	158000	111000	134000	980000	709000	1060000	1.12464	6.82134	2.77006
pma0249	Selgin 5-O-hexoside	Flavone	458000	488000	595000	3450000	3640000	5400000	1.17207	8.10513	3.01883
pmb2850	Tricin	Flavone	93400	74000	63100	661000	799000	431000	1.17107	8.2039	3.03631
pme1624	Isovitexin	Flavone	2950	1560	9	15800	19400	9220	1.32908	9.82961	3.29713
pmb2992	Acacetin O-glucuronic acid	Flavone	4440	1700	2420	23400	40000	25200	1.24193	10.3505	3.37162
pme0324	Chrysin	Flavone	11500	3590	8950	127000	131000	128000	1.36983	16.0566	4.00509
pmb0653	di-C,C-hexosyl-apigenin	Flavone	9	9	5990	47900	36200	41700	1.85857	20.9387	4.3881
pma1108	Apigenin C-glucoside	Flavone	2040	9	9	13100	26400	8850	1.76601	23.4937	4.5542
pmb3024	Luteolin C-hexoside	Flavone	9	9	9	9	1480	9	0.716658	55.4815	5.79393
pma0779	Tricin O-rhamnosyl-O-malonylhexoside	Flavone	9	9	9	1790	9890	3630	2.00821	567.037	9.1473
pma6515	C-hexosyl-chrysin O-feruloylhexoside	Flavone	9	9	9	6480	9000	5660	2.10947	782.963	9.6128
pme0367	Apigenin 7-rutinoside (Isorhoifolin)	Flavone	9	9	9	7110	11400	6100	2.13009	911.481	9.83207
pmb0579	Chrysoeriol O-sinapoylhexoside	Flavone	9	9	9	12200	20100	16200	2.2369	1796.3	10.8108
pmf0330	Spinosin	Flavonoid	5460	3450	5580	9	9	9	2.04757	0.00186335	-9.06788
pmf0260	Sinensetin	Flavonoid	934	1490	1080	9	9	9	1.80047	0.00770548	-7.0199
pmf0369	Persicoside	Flavonoid	452000	254000	405000	81300	72200	87500	0.989414	0.216922	-2.20475
pmf0302	Engeletin	Flavonoid	1000000	1130000	1050000	314000	348000	314000	0.887909	0.306918	-1.70407
pmf0246	Orientin	Flavonoid	71900	60800	71000	26200	29600	29700	0.758178	0.419735	-1.25245
pmf0374	Isorhamnetin 3-O-glucoside	Flavonoid	48500000	35100000	50900000	24600000	20200000	26200000	0.623037	0.527881	-0.921715
pmf0279	Gossypitrin	Flavonoid	40200000	40000000	40700000	27600000	25100000	29600000	0.502131	0.680728	-0.55485
pmf0204	Hyperoside	Flavonoid	5320000	5280000	5750000	3880000	3740000	3740000	0.490249	0.694801	-0.525328
pmf0361	Astilbin	Flavonoid	1180000	1180000	1070000	814000	946000	784000	0.429338	0.741691	-0.43111
pmf0208	Isoquercitroside	Flavonoid	5430000	5430000	5260000	4290000	4020000	4280000	0.403676	0.781017	-0.356573
pmf0179	Narcissoside	Flavonoid	2750000	2740000	3100000	2350000	2850000	2330000	0.242833	0.876601	-0.190008
pmf0550	Diosmin	Flavonoid	73700	67100	8520	69800	43400	22900	0.112261	0.911465	-0.13374
pmf0233	Tiliroside	Flavonoid	36000000	33900000	34800000	32500000	33400000	31300000	0.202304	0.928367	-0.107233
pmf0583	Phloridzin	Flavonoid	2780000	2800000	2770000	3450000	4400000	4000000	0.462197	1.41916	0.505039
pmf0371	Pedalitin	Flavonoid	2480000	2520000	2420000	4650000	5700000	4280000	0.660983	1.9717	0.979439
pmf0567	Tectorigenin	Flavonoid	1410	1040	2070	5040	3810	5400	0.857162	3.15265	1.65657
pmf0274	Herbacetin	Flavonoid	651000	858000	492000	2500000	2970000	2640000	0.963554	4.05297	2.01898
pmf0115	Galangin	Flavonoid	7790	7150	14000	53500	52300	44000	1.0462	5.17623	2.3719
pmf0392	Persicogenin	Flavonoid	3950	9	1530	14300	13400	10600	1.26155	6.97759	2.80273
pmf0362	Hydroxygenkwanin	Flavonoid	5660	4240	2310	37600	27700	32000	1.17622	7.96888	2.99438
pmf0382	5,7-Dihydroxy-3',4',5'-trimethoxyflavone	Flavonoid	6700	4880	9680	57900	63900	76200	1.22013	9.31326	3.21929
pmf0265	5,7-Dihydroxychromone	Flavonoid	17300	6170	8830	130000	169000	135000	1.32314	13.4365	3.74809
pmf0109	3-O-Acetylpinobanksin	Flavonoid	124000	40300	124000	1630000	1930000	1760000	1.40339	18.453	4.20578
pmf0472	Apiin	Flavonoid	9	9	9	7840	9020	6140	2.1243	851.852	9.73446
pme3484	Myricetin 3-O-galactoside	Flavonol	28500000	29100000	32400000	772000	716000	1030000	1.54942	0.0279778	-5.15957
pme1552	Myricetin 3-O-rhamnoside (Myricitrin)	Flavonol	6660000	7730000	6970000	824000	890000	711000	1.20606	0.11353	-3.13885
pme3296	Kaempferol 3-O-rhamnoside (Kaempferin)	Flavonol	27800000	27700000	27800000	3740000	3990000	4350000	1.13785	0.145018	-2.7857
pmb3026	Quercetin O-acetylhexoside	Flavonol	404000	419000	334000	90200	110000	123000	0.918951	0.279343	-1.83989
pme1506	Kaempferol 7-O-rhamnoside	Flavonol	5780000	4950000	5580000	1510000	1690000	1720000	0.894068	0.301655	-1.72903
pmb0604	Kaempferol 3-O-glucoside (Astragalin)	Flavonol	11500000	11400000	11200000	3800000	3130000	3660000	0.884322	0.310557	-1.68707
pmb0565	Syringetin 3-O-hexoside	Flavonol	265000	215000	251000	60700	88800	93600	0.850557	0.332558	-1.58832
pme3268	Kaempferol 3-O-galactoside (Trifolin)	Flavonol	6840000	7170000	6790000	2590000	2250000	2520000	0.833366	0.353846	-1.49881
pme3442	Quercetin 7-O-β-D-Glucuronide	Flavonol	236000	245000	228000	88400	107000	94800	0.771479	0.409309	-1.28874
pme3369	Rhamnetin (7-O-methxyl quercetin)	Flavonol	40000	53400	40300	19400	12800	25300	0.723513	0.430067	-1.21737
pma0787	Quercetin-3-(6''-malonyl)-Glucoside	Flavonol	16200	25300	15800	4340	11300	9060	0.695599	0.431065	-1.21402
pme3211	Quercetin 3-O-glucoside (Isotrifoliin)	Flavonol	2920000	2850000	2810000	1390000	1280000	1260000	0.722254	0.458042	-1.12645
pme2898	Dihydromyricetin	Flavonol	872000	1130000	807000	501000	462000	527000	0.628725	0.530438	-0.914744
pme0361	Quercetin 3-alpha-L-arabinofuranoside (Avicularin)	Flavonol	25900000	24600000	25300000	13300000	13900000	14700000	0.629192	0.55277	-0.855248
pme3130	Quercetin 4'-O-glucoside (Spiraeoside)	Flavonol	4770000	4390000	4570000	3610000	3340000	3290000	0.43636	0.745812	-0.423116
pme3407	Laricitrin	Flavonol	567000	536000	451000	438000	412000	317000	0.385989	0.750965	-0.413182
pme1605	Kaempferol 3-O-robinobioside (Biorobin)	Flavonol	367000	402000	375000	264000	299000	298000	0.425199	0.752622	-0.410002
pme0369	Kaempferol 3-O-rutinoside (Nicotiflorin)	Flavonol	391000	358000	378000	249000	316000	289000	0.409195	0.757764	-0.40018
pmb3013	Isorhamnetin O-acetyl-hexoside	Flavonol	32700	16900	24900	19000	23100	17700	0.231407	0.802685	-0.317095
pma6639	Isorhamnetin O-hexoside	Flavonol	26000000	21300000	23600000	23600000	22100000	24800000	0.00900967	0.994358	-0.00816237
pme2963	Aromadedrin (Dihydrokaempferol)	Flavonol	746000	662000	832000	728000	813000	723000	0.0281414	1.01071	0.0153752
pmb0595	Isorhamnetin 5-O-hexoside	Flavonol	4740000	3760000	4250000	5110000	4270000	4340000	0.139525	1.07608	0.105783
pme1539	Isorhamnetin 3-O-neohesperidoside	Flavonol	743000	864000	951000	1080000	1170000	1030000	0.3779	1.28225	0.35868
pme1478	Myricetin	Flavonol	12400000	14300000	11000000	16700000	22600000	15000000	0.431187	1.44032	0.526388
pme1500	Kumatakenin	Flavonol	31700	40400	25800	56400	44700	55100	0.522122	1.59551	0.674014
pme0197	Quercetin 3-O-rutinoside (Rutin)	Flavonol	593000	650000	625000	1060000	1050000	929000	0.565283	1.62687	0.702102
pma6389	Ayanin	Flavonol	11200	11300	11100	15600	23100	16100	0.529175	1.63095	0.705715
pme2493	Kaempferol 3,7-dirhamnoside (Kaempferitrin)	Flavonol	129000	140000	126000	419000	401000	429000	0.877669	3.16203	1.66085
pme0200	Kaempferol	Flavonol	7920000	9710000	5200000	23200000	29600000	25600000	0.898516	3.43408	1.77992
pma1116	Kaempferide	Flavonol	163000	68100	95700	403000	642000	229000	0.881822	3.89841	1.96289
pmb0711	Quercetin 7-O-rutinoside	Flavonol	1110000	1380000	1410000	4970000	5820000	4650000	0.956047	3.95897	1.98513
pme3288	3,7-Di-O-methylquercetin	Flavonol	8850	7920	9990	34000	33600	42100	0.966492	4.0994	2.03541
pme3401	Syringetin	Flavonol	447000	448000	306000	1760000	2120000	1360000	0.979863	4.36303	2.12533
pme3514	Morin	Flavonol	667000	827000	453000	2570000	3120000	2860000	0.99046	4.39137	2.13467
pme1521	Dihydroquercetin (Taxifolin)	Flavonol	441000	400000	418000	1820000	1830000	2000000	1.00192	4.48769	2.16597
pme2954	Quercetin	Flavonol	7470000	8960000	5690000	44700000	54900000	51500000	1.13249	6.83092	2.77208
pmb3894	Di-O-methylquercetin	Flavonol	108000	104000	70600	826000	756000	644000	1.17379	7.87686	2.97762
pme1588	Isorhamnetin	Flavonol	5240000	5770000	3210000	53000000	58500000	53500000	1.28278	11.6034	3.53647
pme0355	Daidzein	Isoflavone	76300	97400	89200	20800	38500	26700	0.852646	0.327121	-1.61211
pme3276	2'-Hydroxygenistein	Isoflavone	7630	11300	6300	6260	2200	5060	0.560931	0.53587	-0.900045
pme3292	Prunetin	Isoflavone	92600	41800	57100	99400	108000	73000	0.422256	1.46423	0.550142
pme3502	Formononetin 7-O-glucoside (Ononin)	Isoflavone	14800	14100	10600	29300	23400	23700	0.645701	1.93418	0.95172
pme3399	Sissotrin	Isoflavone	165000	147000	106000	290000	353000	327000	0.736901	2.32057	1.21448
pme1568	Orobol (5,7,3',4'-tetrahydroxyisoflavone)	Isoflavone	15900	10700	10700	117000	111000	109000	1.2149	9.03485	3.1755
pmb3114	Epicatechin-epiafzelechin	Polyphenol	46900	42900	45300	26100	35800	28500	0.49825	0.669134	-0.579633
pme2247	Ellagic acid	Polyphenol	261000	248000	288000	189000	222000	195000	0.40728	0.760351	-0.395262
pme2478	Protocatechuic aldehyde	Polyphenol	42800	40700	40100	42200	42200	39800	0.0174945	1.00485	0.00698643
pmb2947	Catechin-catechin-catechin	Polyphenol	650000	638000	553000	597000	639000	640000	0.0503278	1.01901	0.0271702
pme1486	Epigallate catechin gallate (EGCG)	Polyphenol	50600000	44500000	44500000	47500000	50800000	49100000	0.137804	1.05587	0.0784376
pmf0458	6-Gingerol	Polyphenol	856000	637000	675000	974000	829000	697000	0.212702	1.15314	0.205563
pmf0379	Gallocatechin gallate	Polyphenol	2620000	2240000	1850000	2940000	2270000	2600000	0.235585	1.16393	0.21901
pme1514	Epigallocatechin (EGC)	Polyphenol	9540000	7760000	7530000	11300000	10100000	9590000	0.344445	1.24809	0.319718
pmb2831	Protocatechuic acid O-glucoside	Polyphenol	3820000	3770000	3670000	6460000	5440000	5940000	0.54742	1.58437	0.663909
pme1824	Protocatechuic acid	Polyphenol	568000	535000	468000	828000	969000	801000	0.566354	1.65372	0.725718
pme0450	L-Epicatechin	Polyphenol	14700000	13300000	13200000	26300000	26500000	25000000	0.650819	1.88835	0.917126
pmf0344	(-)-Epiafzelechin	Polyphenol	4010	3790	2540	5490	9400	7400	0.66883	2.15571	1.10816
pme1535	(+)-Gallocatechin (GC)	Polyphenol	5660000	4870000	4900000	16000000	16800000	15700000	0.874969	3.14323	1.65225
pmb0835	Gallocatechin-gallocatechin	Polyphenol	22000000	16700000	27000000	59400000	77400000	75600000	0.874368	3.23288	1.69282
pme1562	Epicatechin gallate (ECG)	Polyphenol	14600000	13500000	11600000	53800000	55100000	51600000	0.966722	4.04282	2.01536
pmf0216	Catechin gallate，CG	Polyphenol	419000	353000	302000	3110000	3420000	2710000	1.19905	8.60335	3.1049
pmf0238	Theaflavin-3-gallate	Polyphenol	55000	68500	55700	760000	754000	740000	1.30314	12.5781	3.65284
pmf0240	Theaflavin	Polyphenol	57200	65800	55200	782000	723000	753000	1.30462	12.6712	3.66348
pme0205	Catechin	Polyphenol	935000	639000	610000	20900000	22100000	20100000	1.50288	28.8919	4.8526
pme0436	Procyanidin B3	Proanthocyanidins	5330000	4650000	4910000	7510000	7600000	7350000	0.520668	1.50839	0.593014
pme0434	Procyanidin B2	Proanthocyanidins	5150000	4230000	4820000	7270000	7180000	7280000	0.526272	1.53028	0.613797
pme0431	Procyanidin A1	Proanthocyanidins	25200	21500	27200	59600	93300	98200	0.879384	3.39783	1.76462
