# Supplementary material for: <span aria-describedby="tippy-17">Transcriptomic and Metabolomic Profiling Provides Insights into Flavonoids Biosynthesis and Flower Coloring in <em>Loropetalum chinense</em> and <em>Loropetalum chinense</em> var. <em>rubrum</em>
Source: Preprints.org preprint supplement (doi:10.20944/preprints202304.0456.v1), 2023-04-18
Supplement: Supplementary file 14 [file supplementary table S20.xlsx]

## Sheet: Table S20 
Supplementary table S20 The compared transcriptome of XNFJ VS XNXY on KEGG metabolic pathway annotation
Pathway	ko_ID	Unique compound	compound	Uni_all	compound_all	Index	KEGG pathway
Flavone and flavonol biosynthesis	ko00944	2	21	16	92	pmf0472;pma1116	C04858+C10098
Anthocyanin biosynthesis	ko00942	6	7	16	92	pme1777;pmb0550;pme1398;pme3391;pme0442;pme1793	C08639+C08604+C12138+C12139+C05908+C08725
Flavonoid biosynthesis	ko00941	3	35	16	92	pme0442;pme3303;pme0372	C05908+C10192+C09099
Biosynthesis of secondary metabolites	ko01110	1	31	16	92	pme0442	C05908
Isoflavonoid biosynthesis	ko00943	1	10	16	92	pme3208	C16195
