# Supplementary material for: <span aria-describedby="tippy-17">Transcriptomic and Metabolomic Profiling Provides Insights into Flavonoids Biosynthesis and Flower Coloring in <em>Loropetalum chinense</em> and <em>Loropetalum chinense</em> var. <em>rubrum</em>
Source: Preprints.org preprint supplement (doi:10.20944/preprints202304.0456.v1), 2023-04-18
Supplement: Supplementary file 15 [file supplementary table S21.xlsx]

## Sheet: Table S21
Supplementary table S21 Quality statistics of filtered reads
Sample name	Library ID	Raw reads	Clean reads	Clean bases(GB）	Error rate(%)	Q20(%)	Q30(%)	GC content(%)	Total reads	Total mapped	Total mapped ratio（%）
XNFJ1	FRAS190049888-1a	46381306	45530254	6.83	0.02	98.16	94.54	43.59	45530254	39504662	86.77
XNFJ2	FRAS190049889-1a	49744954	48881462	7.33	0.03	97.94	94.02	43.68	48881462	42220004	86.37
XNFJ3	FRAS190049890-1a	64382016	62639476	9.4	0.03	97.83	93.82	43.41	62639476	53356328	85.18
XNNC1	FRAS190049891-1a	56396892	55752460	8.36	0.03	97.98	94.1	43.75	55752460	45997860	82.5
XNNC2	FRAS190049892-1a	57265298	56573052	8.49	0.03	97.97	94.12	44.1	56573052	46893034	82.89
XNNC3	FRAS190049893-1a	47399612	46862804	7.03	0.02	98.05	94.26	43.93	46862804	38603872	82.38
XNXY1	FRAS190049894-1a	58641764	57360592	8.6	0.03	97.9	93.97	43.43	57360592	46245074	80.62
XNXY2	FRAS190049895-1a	52614862	51738060	7.76	0.03	97.98	94.23	43.31	51738060	41574196	80.36
XNXY3	FRAS190049896-1a	58365288	56221590	8.43	0.03	97.92	94.15	43.54	56221590	45229902	80.45
LDPF1	FRAS190049897-1a	65078706	62524960	9.38	0.03	97.87	93.94	43.91	62524960	51119038	81.76
LDPF2	FRAS190049898-1a	48404146	48070320	7.21	0.03	97.61	93.09	44.02	48070320	40213306	83.66
LDPF3	FRAS190049899-1a	60114676	58823758	8.82	0.02	98.15	94.61	44.01	58823758	48644046	82.69
