# Supplementary material for: <span aria-describedby="tippy-17">Transcriptomic and Metabolomic Profiling Provides Insights into Flavonoids Biosynthesis and Flower Coloring in <em>Loropetalum chinense</em> and <em>Loropetalum chinense</em> var. <em>rubrum</em>
Source: Preprints.org preprint supplement (doi:10.20944/preprints202304.0456.v1), 2023-04-18
Supplement: Supplementary file 16 [file supplementary table S22.xlsx]

## Sheet: Sheet1
Supplementary table S22 Major indicators of the full-length transcriptome of Loropetalum chinense var. rubrum
Subreads
Number	1562962
Total Base (Gb)	46.16
Average subreads length (bp)	29532
N50 Length (bp)	51440
Subreads after filtering and adapter removing
Number	35173249
Total Base (Gb)	43.5
Average subreads length (bp)	1237
N50 Length (bp)	1981
Full-length non-chimericRead (FLNC)
Full-length non-chimeric Reads	723655
Min length (bp)	200
Max length (bp)	14229
Mean length (bp)	2059
N50	2548
The classification of full-length transcriptome
Circular Consensus Sequence (CCS) Reads	1301081
Containing of 5'-primer CCS Reads	1081784
Containing of 3'-primer CCS Reads	1166023
Containing of Ploy-A CCS Reads	1136101
Filtered short Reads	47522
Non-full length Reads (NFL)	288342
Full-length Reads (FL)	965217
Full-length non-chimeric Reads (FLNC)	723655
Full-length chimeric Reads (FLC)	241562
Full-length non-chimeric mean read length	2058
FLNC/CCS (%)	55.62
Polished consensus
Consensus Number	394101
Consensus Min Length (bp)	118
Consensus Max Length (bp)	14229
Consensus Mean Length (bp)	2034
N50	2662
Non-redundant high-quality consensus
Number	171783
Total length (bp)	406454922
N50 (bp)	2935
N90 (bp)	1568
Max length (bp)	14258
Min length (bp)	132
Mean length (bp)	2367
