# Supplementary material for: <span aria-describedby="tippy-17">Transcriptomic and Metabolomic Profiling Provides Insights into Flavonoids Biosynthesis and Flower Coloring in <em>Loropetalum chinense</em> and <em>Loropetalum chinense</em> var. <em>rubrum</em>
Source: Preprints.org preprint supplement (doi:10.20944/preprints202304.0456.v1), 2023-04-18
Supplement: Supplementary file 17 [file supplementary table S23.xlsx]

## Sheet: Table S23   
Supplementary table S23 The GO enrichment analysis of DETs between XNNC VS LDPF group
GO_accession	Description	Term_type	Over_represented_pValue	Corrected_pValue	DEG_item	DEG_list	Bg_item	Bg_list	up	Down
GO:0005488	binding	molecular_function	0.0016282	0.045512	10489	17460	45204	76974	5776	0
GO:0003824	catalytic activity	molecular_function	2.0052e-25	9.4163e-22	9039	17460	37140	76974	4929	0
GO:0008152	metabolic process	biological_process	4.7439e-13	7.6818e-11	9041	17460	38138	76974	4887	0
GO:0009987	cellular process	biological_process	0.013143	0.24109	8192	17460	35601	76974	4507	0
GO:0071704	organic substance metabolic process	biological_process	0.00036531	0.012996	7010	17460	30055	76974	3816	0
GO:0044238	primary metabolic process	biological_process	0.00093407	0.030251	6726	17460	28867	76974	3657	0
GO:0044699	single-organism process	biological_process	1.5854e-05	0.00089699	6322	17460	26880	76974	3527	0
GO:0097159	organic cyclic compound binding	molecular_function	5.1452e-07	3.7172e-05	5999	17460	25105	76974	3283	0
GO:1901363	heterocyclic compound binding	molecular_function	5.1452e-07	3.7172e-05	5999	17460	25105	76974	3283	0
GO:0044237	cellular metabolic process	biological_process	0.011943	0.22255	6011	17460	25988	76974	3279	0
GO:0043167	ion binding	molecular_function	7.2352e-21	4.8538e-18	5907	17460	23628	76974	3216	0
GO:0043170	macromolecule metabolic process	biological_process	0.39987	1	5070	17460	22305	76974	2853	0
GO:0044260	cellular macromolecule metabolic process	biological_process	0.25646	1	4581	17460	20056	76974	2597	0
GO:0044763	single-organism cellular process	biological_process	0.047712	0.585	4344	17460	18770	76974	2396	0
GO:0005515	protein binding	molecular_function	0.084421	0.79433	4383	17460	18804	76974	2386	0
GO:0036094	small molecule binding	molecular_function	1.609e-18	8.3956e-16	3940	17460	15382	76974	2150	0
GO:0000166	nucleotide binding	molecular_function	2.604e-18	1.019e-15	3858	17460	15049	76974	2101	0
GO:1901265	nucleoside phosphate binding	molecular_function	2.604e-18	1.019e-15	3858	17460	15049	76974	2101	0
GO:0016740	transferase activity	molecular_function	4.2978e-13	7.2079e-11	3658	17460	14628	76974	2042	0
GO:0043168	anion binding	molecular_function	1.9927e-13	3.4658e-11	3739	17460	14833	76974	2007	0
GO:0044710	single-organism metabolic process	biological_process	6.0745e-06	0.00037534	3539	17460	14730	76974	1936	0
GO:0006807	nitrogen compound metabolic process	biological_process	0.99931	1	3388	17460	15693	76974	1812	0
GO:0097367	carbohydrate derivative binding	molecular_function	4.7504e-11	5.8933e-09	3318	17460	13219	76974	1796	0
GO:0016020	membrane	cellular_component	0.89214	1	3255	17460	14698	76974	1788	0
GO:0017076	purine nucleotide binding	molecular_function	2.4446e-11	3.4788e-09	3297	17460	13106	76974	1775	0
GO:0032553	ribonucleotide binding	molecular_function	6.9332e-11	7.3996e-09	3287	17460	13096	76974	1771	0
GO:0001882	nucleoside binding	molecular_function	5.0838e-11	5.8933e-09	3266	17460	12996	76974	1758	0
GO:0001883	purine nucleoside binding	molecular_function	5.1453e-11	5.8933e-09	3265	17460	12992	76974	1758	0
GO:0032549	ribonucleoside binding	molecular_function	5.1453e-11	5.8933e-09	3265	17460	12992	76974	1758	0
GO:0032550	purine ribonucleoside binding	molecular_function	5.1453e-11	5.8933e-09	3265	17460	12992	76974	1758	0
GO:0032555	purine ribonucleotide binding	molecular_function	5.2877e-11	5.9121e-09	3266	17460	12997	76974	1758	0
GO:0019538	protein metabolic process	biological_process	3.8928e-05	0.0019243	2999	17460	12439	76974	1698	0
GO:0030554	adenyl nucleotide binding	molecular_function	5.0755e-16	1.2544e-13	3148	17460	12188	76974	1690	0
GO:0035639	purine ribonucleoside triphosphate binding	molecular_function	6.1216e-07	4.2864e-05	3023	17460	12238	76974	1684	0
GO:0032559	adenyl ribonucleotide binding	molecular_function	1.7807e-15	3.9819e-13	3124	17460	12116	76974	1680	0
GO:0034641	cellular nitrogen compound metabolic process	biological_process	0.99998	1	3099	17460	14584	76974	1646	0
GO:0009058	biosynthetic process	biological_process	0.97327	1	3007	17460	13737	76974	1609	0
GO:0005524	ATP binding	molecular_function	6.4387e-11	7.0316e-09	2867	17460	11323	76974	1599	0
GO:1901360	organic cyclic compound metabolic process	biological_process	0.94933	1	2945	17460	13346	76974	1599	0
GO:0016787	hydrolase activity	molecular_function	0.15812	1	2981	17460	12931	76974	1544	0
GO:0005623	cell	cellular_component	0.99999	1	2838	17460	13510	76974	1538	0
GO:0044464	cell part	cellular_component	0.99999	1	2838	17460	13510	76974	1538	0
GO:1901576	organic substance biosynthetic process	biological_process	0.99875	1	2800	17460	13027	76974	1500	0
GO:0006725	cellular aromatic compound metabolic process	biological_process	0.99952	1	2769	17460	12874	76974	1487	0
GO:0046483	heterocycle metabolic process	biological_process	0.99961	1	2758	17460	12836	76974	1479	0
GO:0044267	cellular protein metabolic process	biological_process	4.8237e-06	0.00030203	2482	17460	10134	76974	1430	0
GO:0005622	intracellular	cellular_component	0.99998	1	2603	17460	12395	76974	1411	0
GO:0044249	cellular biosynthetic process	biological_process	0.99997	1	2639	17460	12484	76974	1406	0
GO:0044424	intracellular part	cellular_component	0.99998	1	2510	17460	11984	76974	1362	0
GO:0051179	localization	biological_process	0.74103	1	2344	17460	10461	76974	1357	0
GO:0006139	nucleobase-containing compound metabolic process	biological_process	1	1	2509	17460	11932	76974	1354	0
GO:0043169	cation binding	molecular_function	6.1828e-07	4.2864e-05	2373	17460	9614	76974	1329	0
GO:0046872	metal ion binding	molecular_function	7.5564e-07	5.1427e-05	2346	17460	9505	76974	1315	0
GO:0051234	establishment of localization	biological_process	0.85041	1	2270	17460	10203	76974	1315	0
GO:0006810	transport	biological_process	0.8144	1	2266	17460	10160	76974	1312	0
GO:0016772	transferase activity, transferring phosphorus-containing groups	molecular_function	3.5445e-11	4.8955e-09	2214	17460	8634	76974	1298	0
GO:0003676	nucleic acid binding	molecular_function	0.99994	1	2298	17460	10810	76974	1276	0
GO:0090304	nucleic acid metabolic process	biological_process	0.99991	1	2251	17460	10608	76974	1222	0
GO:0043412	macromolecule modification	biological_process	7.9175e-11	8.2623e-09	2034	17460	7909	76974	1219	0
GO:0065007	biological regulation	biological_process	0.53948	1	2160	17460	9595	76974	1174	0
GO:0050789	regulation of biological process	biological_process	0.39634	1	2077	17460	9149	76974	1139	0
GO:0006464	cellular protein modification process	biological_process	3.3693e-15	6.8792e-13	1877	17460	7035	76974	1138	0
GO:0036211	protein modification process	biological_process	3.3693e-15	6.8792e-13	1877	17460	7035	76974	1138	0
GO:0043226	organelle	cellular_component	0.9916	1	2000	17460	9327	76974	1129	871
GO:0050794	regulation of cellular process	biological_process	0.16152	1	2026	17460	8795	76974	1114	912
GO:0016301	kinase activity	molecular_function	1.0868e-16	3.6453e-14	1825	17460	6739	76974	1100	725
GO:0010467	gene expression	biological_process	1	1	2043	17460	9927	76974	1097	946
GO:0043229	intracellular organelle	cellular_component	0.99863	1	1944	17460	9177	76974	1095	849
GO:0006796	phosphate-containing compound metabolic process	biological_process	4.3056e-11	5.7769e-09	1843	17460	7094	76974	1094	749
GO:0006793	phosphorus metabolic process	biological_process	4.6359e-11	5.8933e-09	1843	17460	7096	76974	1094	749
GO:0055114	oxidation-reduction process	biological_process	7.3097e-14	1.3202e-11	1880	17460	7221	76974	1067	813
GO:0009059	macromolecule biosynthetic process	biological_process	1	1	1932	17460	9486	76974	1050	882
GO:0034645	cellular macromolecule biosynthetic process	biological_process	1	1	1913	17460	9387	76974	1037	876
GO:0016773	phosphotransferase activity, alcohol group as acceptor	molecular_function	2.147e-16	5.6012e-14	1714	17460	6303	76974	1031	683
GO:0044271	cellular nitrogen compound biosynthetic process	biological_process	0.99984	1	1903	17460	9067	76974	1020	883
GO:1902578	single-organism localization	biological_process	0.27997	1	1735	17460	7563	76974	1018	717
GO:0044425	membrane part	cellular_component	0.99998	1	1913	17460	9233	76974	1014	899
GO:0044765	single-organism transport	biological_process	0.20623	1	1720	17460	7461	76974	1010	710
GO:0016491	oxidoreductase activity	molecular_function	5.3394e-12	8.3579e-10	1775	17460	6885	76974	997	778
GO:1901362	organic cyclic compound biosynthetic process	biological_process	0.22127	1	1732	17460	7560	76974	966	766
GO:0016070	RNA metabolic process	biological_process	0.9996	1	1726	17460	8141	76974	950	776
GO:0004672	protein kinase activity	molecular_function	7.6767e-16	1.8025e-13	1507	17460	5485	76974	918	589
GO:0050896	response to stimulus	biological_process	0.00021614	0.0085276	1636	17460	6765	76974	910	726
GO:0016310	phosphorylation	biological_process	8.606e-18	3.1088e-15	1525	17460	5495	76974	908	617
GO:0043231	intracellular membrane-bounded organelle	cellular_component	0.9903	1	1556	17460	7263	76974	892	664
GO:0043227	membrane-bounded organelle	cellular_component	0.99095	1	1556	17460	7267	76974	892	664
GO:0006468	protein phosphorylation	biological_process	5.6851e-19	3.3372e-16	1438	17460	5102	76974	870	568
GO:0018130	heterocycle biosynthetic process	biological_process	0.91469	1	1548	17460	7062	76974	852	696
GO:0019438	aromatic compound biosynthetic process	biological_process	0.88722	1	1539	17460	6998	76974	846	693
GO:0031224	intrinsic component of membrane	cellular_component	0.99856	1	1473	17460	7019	76974	815	658
GO:0016021	integral component of membrane	cellular_component	0.99892	1	1464	17460	6991	76974	809	655
GO:0046914	transition metal ion binding	molecular_function	0.060096	0.66403	1432	17460	6057	76974	801	631
GO:0032991	macromolecular complex	cellular_component	1	1	1493	17460	7430	76974	780	713
GO:0034654	nucleobase-containing compound biosynthetic process	biological_process	0.97184	1	1342	17460	6217	76974	744	598
GO:0003677	DNA binding	molecular_function	0.98924	1	1331	17460	6205	76974	741	590
GO:0005215	transporter activity	molecular_function	0.32553	1	1190	17460	5219	76974	688	502
GO:0032774	RNA biosynthetic process	biological_process	0.8303	1	1222	17460	5539	76974	679	543
GO:0006351	transcription, DNA-templated	biological_process	0.83734	1	1200	17460	5446	76974	666	534
GO:0097659	nucleic acid-templated transcription	biological_process	0.83734	1	1200	17460	5446	76974	666	534
GO:1901564	organonitrogen compound metabolic process	biological_process	0.94906	1	1254	17460	5813	76974	654	600
GO:0005634	nucleus	cellular_component	0.84203	1	1100	17460	4996	76974	652	448
GO:0019222	regulation of metabolic process	biological_process	0.6127	1	1189	17460	5278	76974	641	548
GO:0043234	protein complex	cellular_component	1	1	1205	17460	5977	76974	632	573
GO:0031323	regulation of cellular metabolic process	biological_process	0.23471	1	1155	17460	4990	76974	622	533
GO:0051716	cellular response to stimulus	biological_process	0.28004	1	1115	17460	4862	76974	619	496
GO:0060255	regulation of macromolecule metabolic process	biological_process	0.50585	1	1126	17460	4965	76974	611	515
GO:0005737	cytoplasm	cellular_component	0.99995	1	1148	17460	5704	76974	607	541
GO:0080090	regulation of primary metabolic process	biological_process	0.26928	1	1112	17460	4816	76974	602	510
GO:0010468	regulation of gene expression	biological_process	0.51798	1	1086	17460	4792	76974	594	492
GO:0051171	regulation of nitrogen compound metabolic process	biological_process	0.20154	1	1078	17460	4640	76974	589	489
GO:0055085	transmembrane transport	biological_process	0.25781	1	1013	17460	4369	76974	586	427
GO:0010556	regulation of macromolecule biosynthetic process	biological_process	0.22436	1	1071	17460	4619	76974	585	486
GO:0031326	regulation of cellular biosynthetic process	biological_process	0.22436	1	1071	17460	4619	76974	585	486
GO:0009889	regulation of biosynthetic process	biological_process	0.22945	1	1071	17460	4621	76974	585	486
GO:0016817	hydrolase activity, acting on acid anhydrides	molecular_function	0.0015332	0.043636	1060	17460	4281	76974	583	477
GO:2000112	regulation of cellular macromolecule biosynthetic process	biological_process	0.21515	1	1063	17460	4581	76974	581	482
GO:0019219	regulation of nucleobase-containing compound metabolic process	biological_process	0.022289	0.34431	1026	17460	4282	76974	568	458
GO:0051252	regulation of RNA metabolic process	biological_process	0.028544	0.42033	1015	17460	4247	76974	562	453
GO:2001141	regulation of RNA biosynthetic process	biological_process	0.028544	0.42033	1015	17460	4247	76974	562	453
GO:0006355	regulation of transcription, DNA-templated	biological_process	0.0262	0.39184	1007	17460	4209	76974	558	449
GO:1903506	regulation of nucleic acid-templated transcription	biological_process	0.0262	0.39184	1007	17460	4209	76974	558	449
GO:0016818	hydrolase activity, acting on acid anhydrides, in phosphorus-containing anhydrides	molecular_function	0.00039809	0.014056	1012	17460	4030	76974	557	455
GO:0007154	cell communication	biological_process	0.010851	0.21056	920	17460	3808	76974	555	365
GO:0044422	organelle part	cellular_component	0.99997	1	960	17460	4767	76974	552	408
GO:0008270	zinc ion binding	molecular_function	0.97295	1	934	17460	4305	76974	551	383
GO:0022857	transmembrane transporter activity	molecular_function	0.55874	1	962	17460	4273	76974	547	415
GO:0044446	intracellular organelle part	cellular_component	0.99999	1	950	17460	4736	76974	546	404
GO:0016462	pyrophosphatase activity	molecular_function	0.00097899	0.031274	973	17460	3892	76974	532	441
GO:0071840	cellular component organization or biogenesis	biological_process	0.36373	1	963	17460	4217	76974	518	445
GO:0017111	nucleoside-triphosphatase activity	molecular_function	0.0010806	0.034056	937	17460	3744	76974	508	429
GO:0044281	small molecule metabolic process	biological_process	0.30139	1	996	17460	4319	76974	505	491
GO:0044711	single-organism biosynthetic process	biological_process	0.12014	0.99084	957	17460	4096	76974	503	454
GO:0016043	cellular component organization	biological_process	0.35443	1	880	17460	3848	76974	472	408
GO:0044444	cytoplasmic part	cellular_component	0.99992	1	882	17460	4434	76974	468	414
GO:0006811	ion transport	biological_process	0.27166	1	791	17460	3449	76974	450	341
GO:0005975	carbohydrate metabolic process	biological_process	0.85946	1	882	17460	3991	76974	444	438
GO:0023052	signaling	biological_process	0.44198	1	767	17460	3381	76974	438	329
GO:0048037	cofactor binding	molecular_function	7.9204e-15	1.4878e-12	792	17460	2751	76974	437	355
GO:0044700	single organism signaling	biological_process	0.45084	1	766	17460	3379	76974	437	329
GO:1901566	organonitrogen compound biosynthetic process	biological_process	0.99997	1	856	17460	4300	76974	436	420
GO:0007165	signal transduction	biological_process	0.47182	1	759	17460	3354	76974	433	326
GO:0006950	response to stress	biological_process	9.6631e-05	0.0044775	719	17460	2838	76974	419	300
GO:0071702	organic substance transport	biological_process	0.99982	1	726	17460	3599	76974	406	320
GO:0022892	substrate-specific transporter activity	molecular_function	0.98959	1	657	17460	3166	76974	376	281
GO:0050662	coenzyme binding	molecular_function	1.8662e-16	5.1551e-14	672	17460	2249	76974	373	299
GO:0006629	lipid metabolic process	biological_process	2.0127e-18	9.4516e-16	752	17460	2512	76974	370	382
GO:0006259	DNA metabolic process	biological_process	0.97433	1	703	17460	3316	76974	368	335
GO:0006082	organic acid metabolic process	biological_process	0.0017656	0.047928	744	17460	2963	76974	363	381
GO:0043436	oxoacid metabolic process	biological_process	0.0023063	0.059506	740	17460	2954	76974	360	380
GO:0033036	macromolecule localization	biological_process	0.99999	1	634	17460	3238	76974	354	280
GO:0019752	carboxylic acid metabolic process	biological_process	0.0038996	0.087201	724	17460	2903	76974	350	374
GO:0022891	substrate-specific transmembrane transporter activity	molecular_function	0.90071	1	614	17460	2859	76974	350	264
GO:0051641	cellular localization	biological_process	0.99998	1	611	17460	3091	76974	346	265
GO:0016887	ATPase activity	molecular_function	0.00021791	0.0085276	628	17460	2414	76974	345	283
GO:0015075	ion transmembrane transporter activity	molecular_function	0.95297	1	579	17460	2732	76974	330	249
GO:0051649	establishment of localization in cell	biological_process	0.99995	1	583	17460	2936	76974	329	254
GO:0019001	guanyl nucleotide binding	molecular_function	0.043179	0.54362	558	17460	2293	76974	328	230
GO:0006508	proteolysis	biological_process	0.95253	1	626	17460	2926	76974	323	303
GO:0005525	GTP binding	molecular_function	0.031671	0.45762	550	17460	2247	76974	321	229
GO:0032561	guanyl ribonucleotide binding	molecular_function	0.033262	0.47393	551	17460	2253	76974	321	230
GO:0016788	hydrolase activity, acting on ester bonds	molecular_function	0.042087	0.53417	630	17460	2614	76974	319	311
GO:0043228	non-membrane-bounded organelle	cellular_component	0.97903	1	585	17460	2836	76974	318	267
GO:0003723	RNA binding	molecular_function	0.96868	1	589	17460	2765	76974	313	276
GO:0008104	protein localization	biological_process	0.99999	1	560	17460	2877	76974	312	248
GO:0043232	intracellular non-membrane-bounded organelle	cellular_component	0.98723	1	568	17460	2777	76974	308	260
GO:0006812	cation transport	biological_process	0.5498	1	552	17460	2470	76974	307	245
GO:0008233	peptidase activity	molecular_function	0.99959	1	598	17460	2992	76974	306	292
GO:0046907	intracellular transport	biological_process	0.99973	1	531	17460	2650	76974	300	231
GO:0045184	establishment of protein localization	biological_process	0.99999	1	536	17460	2766	76974	298	238
GO:0015031	protein transport	biological_process	0.99997	1	532	17460	2723	76974	295	237
GO:0070011	peptidase activity, acting on L-amino acid peptides	molecular_function	0.99784	1	561	17460	2752	76974	285	276
GO:0051704	multi-organism process	biological_process	0.77232	1	509	17460	2339	76974	282	227
GO:0016757	transferase activity, transferring glycosyl groups	molecular_function	0.056021	0.62786	499	17460	2057	76974	275	224
GO:0009056	catabolic process	biological_process	0.85505	1	512	17460	2359	76974	265	247
GO:0034613	cellular protein localization	biological_process	0.99418	1	474	17460	2293	76974	262	212
GO:0070727	cellular macromolecule localization	biological_process	0.99418	1	474	17460	2293	76974	262	212
GO:0001071	nucleic acid binding transcription factor activity	molecular_function	0.021614	0.33609	395	17460	1594	76974	256	139
GO:0003700	transcription factor activity, sequence-specific DNA binding	molecular_function	0.019734	0.31307	394	17460	1587	76974	255	139
GO:0016614	oxidoreductase activity, acting on CH-OH group of donors	molecular_function	4.206e-15	8.2297e-13	449	17460	1429	76974	252	197
GO:0003924	GTPase activity	molecular_function	3.7776e-05	0.0019164	443	17460	1638	76974	252	191
GO:0044428	nuclear part	cellular_component	0.97906	1	410	17460	1993	76974	250	160
GO:0006996	organelle organization	biological_process	0.96596	1	459	17460	2182	76974	249	210
GO:0016616	oxidoreductase activity, acting on the CH-OH group of donors, NAD or NADP as acceptor	molecular_function	1.7567e-16	5.1551e-14	419	17460	1295	76974	245	174
GO:0006886	intracellular protein transport	biological_process	0.98687	1	446	17460	2137	76974	245	201
GO:0016798	hydrolase activity, acting on glycosyl bonds	molecular_function	0.0051898	0.11442	484	17460	1916	76974	235	249
GO:0006396	RNA processing	biological_process	0.98327	1	436	17460	2084	76974	235	201
GO:0043603	cellular amide metabolic process	biological_process	0.99998	1	483	17460	2552	76974	235	248
GO:0004553	hydrolase activity, hydrolyzing O-glycosyl compounds	molecular_function	0.016999	0.28732	458	17460	1841	76974	228	230
GO:0098796	membrane protein complex	cellular_component	0.99587	1	491	17460	2439	76974	228	263
GO:0016758	transferase activity, transferring hexosyl groups	molecular_function	0.015911	0.27369	401	17460	1604	76974	227	174
GO:1902494	catalytic complex	cellular_component	0.96673	1	395	17460	1915	76974	226	169
GO:0044085	cellular component biogenesis	biological_process	0.31903	1	437	17460	1894	76974	224	213
GO:0043531	ADP binding	molecular_function	1.3722e-16	4.2961e-14	574	17460	1831	76974	223	351
GO:0006520	cellular amino acid metabolic process	biological_process	0.21898	1	414	17460	1748	76974	223	191
GO:0043604	amide biosynthetic process	biological_process	0.99998	1	458	17460	2431	76974	223	235
GO:0044723	single-organism carbohydrate metabolic process	biological_process	0.98641	1	392	17460	1896	76974	217	175
GO:0034660	ncRNA metabolic process	biological_process	0.96911	1	395	17460	1869	76974	214	181
GO:0008324	cation transmembrane transporter activity	molecular_function	0.99726	1	395	17460	1991	76974	214	181
GO:0005198	structural molecule activity	molecular_function	0.78755	1	406	17460	1920	76974	213	193
GO:1901135	carbohydrate derivative metabolic process	biological_process	0.99998	1	376	17460	2000	76974	207	169
GO:0006518	peptide metabolic process	biological_process	1	1	425	17460	2318	76974	202	223
GO:0030001	metal ion transport	biological_process	0.01855	0.30524	334	17460	1352	76974	200	134
GO:0015672	monovalent inorganic cation transport	biological_process	0.12796	1	357	17460	1501	76974	198	159
GO:0044248	cellular catabolic process	biological_process	0.94973	1	382	17460	1820	76974	198	184
GO:0043043	peptide biosynthetic process	biological_process	1	1	413	17460	2252	76974	196	217
GO:0016192	vesicle-mediated transport	biological_process	0.99764	1	350	17460	1729	76974	195	155
GO:0006412	translation	biological_process	0.99999	1	409	17460	2223	76974	194	215
GO:0022890	inorganic cation transmembrane transporter activity	molecular_function	0.99277	1	359	17460	1794	76974	193	166
GO:0033554	cellular response to stress	biological_process	0.3566	1	360	17460	1563	76974	191	169
GO:0008610	lipid biosynthetic process	biological_process	9.3035e-11	9.4976e-09	405	17460	1357	76974	189	216
GO:0004842	ubiquitin-protein transferase activity	molecular_function	0.00013421	0.0057294	265	17460	949	76974	188	77
GO:0019787	ubiquitin-like protein transferase activity	molecular_function	0.00013421	0.0057294	265	17460	949	76974	188	77
GO:0005576	extracellular region	cellular_component	0.37166	1	317	17460	1390	76974	188	129
GO:0043933	macromolecular complex subunit organization	biological_process	0.14666	1	366	17460	1542	76974	186	180
GO:0046906	tetrapyrrole binding	molecular_function	2.5313e-06	0.0001651	331	17460	1170	76974	185	146
GO:0005509	calcium ion binding	molecular_function	0.0060036	0.12873	278	17460	1082	76974	185	93
GO:0020037	heme binding	molecular_function	2.7719e-07	2.1339e-05	327	17460	1139	76974	184	143
GO:0019637	organophosphate metabolic process	biological_process	0.99887	1	346	17460	1762	76974	182	164
GO:0005506	iron ion binding	molecular_function	6.4973e-09	5.3529e-07	361	17460	1224	76974	181	180
GO:1901575	organic substance catabolic process	biological_process	0.81091	1	348	17460	1606	76974	181	167
GO:0006399	tRNA metabolic process	biological_process	0.9851	1	334	17460	1611	76974	180	154
GO:1902582	single-organism intracellular transport	biological_process	0.96513	1	286	17460	1385	76974	179	107
GO:0044283	small molecule biosynthetic process	biological_process	0.014755	0.25855	368	17460	1460	76974	178	190
GO:0004386	helicase activity	molecular_function	0.010067	0.20032	305	17460	1175	76974	175	130
GO:0022607	cellular component assembly	biological_process	0.31091	1	348	17460	1502	76974	175	173
GO:0006974	cellular response to DNA damage stimulus	biological_process	0.33196	1	339	17460	1460	76974	175	164
GO:1990234	transferase complex	cellular_component	0.99074	1	259	17460	1309	76974	174	85
GO:0032501	multicellular organismal process	biological_process	0.043473	0.54586	266	17460	1065	76974	171	95
GO:0031090	organelle membrane	cellular_component	0.99895	1	314	17460	1629	76974	171	143
GO:0051186	cofactor metabolic process	biological_process	0.026069	0.39184	299	17460	1190	76974	168	131
GO:0016705	oxidoreductase activity, acting on paired donors, with incorporation or reduction of molecular oxygen	molecular_function	2.1813e-09	1.8969e-07	323	17460	1064	76974	167	156
GO:0006281	DNA repair	biological_process	0.32975	1	324	17460	1392	76974	167	157
GO:0043565	sequence-specific DNA binding	molecular_function	0.00095926	0.030854	246	17460	907	76974	165	81
GO:0044255	cellular lipid metabolic process	biological_process	0.00073759	0.024565	384	17460	1461	76974	164	220
GO:0022804	active transmembrane transporter activity	molecular_function	0.017009	0.28732	292	17460	1145	76974	164	128
GO:0034470	ncRNA processing	biological_process	0.4847	1	298	17460	1302	76974	164	134
GO:0030529	ribonucleoprotein complex	cellular_component	0.96147	1	311	17460	1564	76974	163	148
GO:0035556	intracellular signal transduction	biological_process	0.58194	1	295	17460	1316	76974	160	135
GO:0016829	lyase activity	molecular_function	0.0059966	0.12873	367	17460	1444	76974	158	209
GO:0004175	endopeptidase activity	molecular_function	0.99981	1	310	17460	1639	76974	153	157
GO:0051287	NAD binding	molecular_function	3.0418e-10	3.0393e-08	251	17460	782	76974	148	103
GO:0034220	ion transmembrane transport	biological_process	0.68251	1	280	17460	1280	76974	147	133
GO:0012505	endomembrane system	cellular_component	0.99968	1	289	17460	1520	76974	146	143
GO:0016053	organic acid biosynthetic process	biological_process	0.0015887	0.044673	309	17460	1165	76974	143	166
GO:0046394	carboxylic acid biosynthetic process	biological_process	0.0015887	0.044673	309	17460	1165	76974	143	166
GO:0016779	nucleotidyltransferase activity	molecular_function	0.99988	1	266	17460	1436	76974	141	125
GO:0071944	cell periphery	cellular_component	0.88814	1	264	17460	1257	76974	140	124
GO:0008236	serine-type peptidase activity	molecular_function	0.14094	1	289	17460	1205	76974	138	151
GO:0017171	serine hydrolase activity	molecular_function	0.14094	1	289	17460	1205	76974	138	151
GO:0042578	phosphoric ester hydrolase activity	molecular_function	0.063478	0.69811	225	17460	895	76974	137	88
GO:0098588	bounding membrane of organelle	cellular_component	0.99814	1	250	17460	1304	76974	137	113
GO:0071822	protein complex subunit organization	biological_process	0.11564	0.97475	287	17460	1188	76974	136	151
GO:0006310	DNA recombination	biological_process	0.15355	1	239	17460	985	76974	136	103
GO:0015077	monovalent inorganic cation transmembrane transporter activity	molecular_function	0.60089	1	260	17460	1176	76974	136	124
GO:0016741	transferase activity, transferring one-carbon groups	molecular_function	0.99605	1	306	17460	1544	76974	136	170
GO:0044877	macromolecular complex binding	molecular_function	0.94161	1	246	17460	1177	76974	132	114
GO:0008033	tRNA processing	biological_process	0.56128	1	237	17460	1044	76974	130	107
GO:0065003	macromolecular complex assembly	biological_process	0.14738	1	270	17460	1125	76974	129	141
GO:0051276	chromosome organization	biological_process	0.62053	1	210	17460	945	76974	129	81
GO:0032787	monocarboxylic acid metabolic process	biological_process	7.6537e-06	0.00046079	306	17460	1073	76974	128	178
GO:0043233	organelle lumen	cellular_component	0.99961	1	222	17460	1207	76974	128	94
GO:0070013	intracellular organelle lumen	cellular_component	0.99961	1	222	17460	1207	76974	128	94
GO:0031974	membrane-enclosed lumen	cellular_component	0.99974	1	222	17460	1215	76974	128	94
GO:0008168	methyltransferase activity	molecular_function	0.99583	1	292	17460	1477	76974	127	165
GO:0006461	protein complex assembly	biological_process	0.075918	0.76394	265	17460	1079	76974	126	139
GO:0070271	protein complex biogenesis	biological_process	0.078433	0.7732	265	17460	1080	76974	126	139
GO:0055086	nucleobase-containing small molecule metabolic process	biological_process	0.99952	1	238	17460	1269	76974	126	112
GO:0060089	molecular transducer activity	molecular_function	0.98628	1	212	17460	1078	76974	124	88
GO:0031981	nuclear lumen	cellular_component	0.99926	1	213	17460	1151	76974	124	89
GO:0007049	cell cycle	biological_process	0.73002	1	226	17460	1036	76974	122	104
GO:1902589	single-organism organelle organization	biological_process	0.97877	1	230	17460	1134	76974	122	108
GO:0016482	cytoplasmic transport	biological_process	0.72624	1	201	17460	922	76974	121	80
GO:0004871	signal transducer activity	molecular_function	0.98566	1	206	17460	1049	76974	121	85
GO:0016746	transferase activity, transferring acyl groups	molecular_function	0.0011294	0.035347	278	17460	1045	76974	120	158
GO:0044764	multi-organism cellular process	biological_process	0.92343	1	239	17460	1160	76974	120	119
GO:0022414	reproductive process	biological_process	3.6415e-07	2.7582e-05	168	17460	521	76974	119	49
GO:1901605	alpha-amino acid metabolic process	biological_process	0.016504	0.28285	228	17460	882	76974	119	109
GO:0006820	anion transport	biological_process	0.28117	1	188	17460	799	76974	118	70
GO:0044703	multi-organism reproductive process	biological_process	2.411e-08	1.9521e-06	164	17460	487	76974	116	48
GO:0065008	regulation of biological quality	biological_process	0.90997	1	251	17460	1225	76974	116	135
GO:0009117	nucleotide metabolic process	biological_process	0.97521	1	220	17460	1091	76974	114	106
GO:0006753	nucleoside phosphate metabolic process	biological_process	0.97681	1	220	17460	1093	76974	114	106
GO:0003735	structural constituent of ribosome	molecular_function	0.67208	1	227	17460	1095	76974	113	114
GO:0044262	cellular carbohydrate metabolic process	biological_process	0.98171	1	188	17460	944	76974	112	76
GO:0006260	DNA replication	biological_process	0.9989	1	231	17460	1228	76974	112	119
GO:0008202	steroid metabolic process	biological_process	2.7837e-21	2.1787e-18	189	17460	448	76974	111	78
GO:0051188	cofactor biosynthetic process	biological_process	0.48591	1	173	17460	756	76974	111	62
GO:0046983	protein dimerization activity	molecular_function	0.56782	1	228	17460	1011	76974	111	117
GO:0006694	steroid biosynthetic process	biological_process	6.0101e-22	1.0212e-18	188	17460	439	76974	110	78
GO:0000151	ubiquitin ligase complex	cellular_component	0.000759	0.025101	160	17460	563	76974	110	50
GO:0000152	nuclear ubiquitin ligase complex	cellular_component	0.00030228	0.011177	159	17460	549	76974	109	50
GO:0005680	anaphase-promoting complex	cellular_component	0.00030228	0.011177	159	17460	549	76974	109	50
GO:0031461	cullin-RING ubiquitin ligase complex	cellular_component	0.00030228	0.011177	159	17460	549	76974	109	50
GO:0006732	coenzyme metabolic process	biological_process	0.41549	1	191	17460	826	76974	109	82
GO:0016874	ligase activity	molecular_function	0.99991	1	213	17460	1149	76974	109	104
GO:0003854	3-beta-hydroxy-delta5-steroid dehydrogenase activity	molecular_function	1.0873e-21	1.0212e-18	184	17460	428	76974	108	76
GO:0016229	steroid dehydrogenase activity	molecular_function	1.0873e-21	1.0212e-18	184	17460	428	76974	108	76
GO:0033764	steroid dehydrogenase activity, acting on the CH-OH group of donors, NAD or NADP as acceptor	molecular_function	1.0873e-21	1.0212e-18	184	17460	428	76974	108	76
GO:0005840	ribosome	cellular_component	0.81652	1	220	17460	1090	76974	108	112
GO:0098655	cation transmembrane transport	biological_process	0.93963	1	213	17460	1044	76974	108	105
GO:0008037	cell recognition	biological_process	8.6229e-10	7.7871e-08	142	17460	388	76974	107	35
GO:0003678	DNA helicase activity	molecular_function	0.0020779	0.055442	208	17460	755	76974	107	101
GO:0042623	ATPase activity, coupled	molecular_function	0.0080002	0.16406	189	17460	707	76974	107	82
GO:0098662	inorganic cation transmembrane transport	biological_process	0.9407	1	212	17460	1040	76974	107	105
GO:0098660	inorganic ion transmembrane transport	biological_process	0.94267	1	212	17460	1041	76974	107	105
GO:0046873	metal ion transmembrane transporter activity	molecular_function	0.99963	1	182	17460	1009	76974	107	75
GO:1901137	carbohydrate derivative biosynthetic process	biological_process	1	1	196	17460	1205	76974	107	89
GO:0009856	pollination	biological_process	7.3731e-10	6.9248e-08	140	17460	380	76974	106	34
GO:0009875	pollen-pistil interaction	biological_process	7.3731e-10	6.9248e-08	140	17460	380	76974	106	34
GO:0048544	recognition of pollen	biological_process	7.3731e-10	6.9248e-08	140	17460	380	76974	106	34
GO:0044706	multi-multicellular organism process	biological_process	1.4375e-09	1.2737e-07	141	17460	387	76974	106	35
GO:0008652	cellular amino acid biosynthetic process	biological_process	0.022932	0.34964	186	17460	716	76974	105	81
GO:0016791	phosphatase activity	molecular_function	0.075705	0.76394	171	17460	676	76974	105	66
GO:0034622	cellular macromolecular complex assembly	biological_process	0.24124	1	215	17460	910	76974	103	112
GO:0090407	organophosphate biosynthetic process	biological_process	0.99999	1	183	17460	1069	76974	103	80
GO:0042221	response to chemical	biological_process	1.7503e-07	1.3699e-05	219	17460	724	76974	102	117
GO:0005694	chromosome	cellular_component	0.72913	1	195	17460	891	76974	102	93
GO:0019012	virion	cellular_component	0.85455	1	195	17460	919	76974	102	93
GO:0016853	isomerase activity	molecular_function	0.88798	1	181	17460	879	76974	102	79
GO:0044421	extracellular region part	cellular_component	0.04244	0.53719	153	17460	603	76974	101	52
GO:0008092	cytoskeletal protein binding	molecular_function	0.8978	1	204	17460	962	76974	100	104
GO:0016051	carbohydrate biosynthetic process	biological_process	0.99976	1	158	17460	882	76974	100	58
GO:1901607	alpha-amino acid biosynthetic process	biological_process	0.0029169	0.068833	172	17460	625	76974	99	73
GO:0032403	protein complex binding	molecular_function	0.82863	1	194	17460	902	76974	99	95
GO:0044419	interspecies interaction between organisms	biological_process	0.99991	1	205	17460	1146	76974	99	106
GO:0044403	symbiosis, encompassing mutualism through parasitism	biological_process	0.99995	1	203	17460	1144	76974	99	104
GO:0043623	cellular protein complex assembly	biological_process	0.12346	0.99763	199	17460	814	76974	98	101
GO:0044423	virion part	cellular_component	0.79595	1	189	17460	879	76974	98	91
GO:0016820	hydrolase activity, acting on acid anhydrides, catalyzing transmembrane movement of substances	molecular_function	0.0103	0.20323	170	17460	638	76974	97	73
GO:0070647	protein modification by small protein conjugation or removal	biological_process	0.35321	1	142	17460	597	76974	97	45
GO:0098772	molecular function regulator	molecular_function	0.90896	1	204	17460	985	76974	97	107
GO:0003724	RNA helicase activity	molecular_function	0.0017407	0.047804	154	17460	540	76974	95	59
GO:0050660	flavin adenine dinucleotide binding	molecular_function	0.0038058	0.085746	197	17460	724	76974	95	102
GO:0006952	defense response	biological_process	6.2068e-07	4.2864e-05	140	17460	439	76974	94	46
GO:0030234	enzyme regulator activity	molecular_function	0.43891	1	192	17460	849	76974	94	98
GO:0005739	mitochondrion	cellular_component	0.85325	1	160	17460	774	76974	94	66
GO:0015399	primary active transmembrane transporter activity	molecular_function	0.007249	0.15129	157	17460	576	76974	93	64
GO:0015405	P-P-bond-hydrolysis-driven transmembrane transporter activity	molecular_function	0.007249	0.15129	157	17460	576	76974	93	64
GO:0016032	viral process	biological_process	0.90732	1	191	17460	915	76974	93	98
GO:0098805	whole membrane	cellular_component	0.79548	1	165	17460	770	76974	92	73
GO:0006813	potassium ion transport	biological_process	8.7363e-08	6.9535e-06	142	17460	421	76974	91	51
GO:0033365	protein localization to organelle	biological_process	0.72821	1	143	17460	663	76974	91	52
GO:0009116	nucleoside metabolic process	biological_process	0.99992	1	177	17460	1003	76974	91	86
GO:1901657	glycosyl compound metabolic process	biological_process	0.99993	1	177	17460	1004	76974	91	86
GO:0030246	carbohydrate binding	molecular_function	0.003645	0.083092	158	17460	567	76974	90	68
GO:0009057	macromolecule catabolic process	biological_process	0.99005	1	164	17460	853	76974	90	74
GO:0016747	transferase activity, transferring acyl groups other than amino-acyl groups	molecular_function	0.00023846	0.0091788	206	17460	731	76974	89	117
GO:0004674	protein serine/threonine kinase activity	molecular_function	0.28018	1	131	17460	543	76974	89	42
GO:0005856	cytoskeleton	cellular_component	0.99928	1	155	17460	842	76974	89	66
GO:0006631	fatty acid metabolic process	biological_process	6.2526e-06	0.00038133	226	17460	760	76974	88	138
GO:0006091	generation of precursor metabolites and energy	biological_process	0.0070137	0.1477	203	17460	767	76974	88	115
GO:0006605	protein targeting	biological_process	0.80075	1	136	17460	643	76974	87	49
GO:0044427	chromosomal part	cellular_component	0.88739	1	161	17460	770	76974	87	74
GO:0019693	ribose phosphate metabolic process	biological_process	0.99248	1	178	17460	923	76974	87	91
GO:1902580	single-organism cellular localization	biological_process	0.8807	1	136	17460	660	76974	86	50
GO:0005216	ion channel activity	molecular_function	0.88819	1	131	17460	631	76974	86	45
GO:0022838	substrate-specific channel activity	molecular_function	0.88819	1	131	17460	631	76974	86	45
GO:0015267	channel activity	molecular_function	0.89159	1	131	17460	632	76974	86	45
GO:0022803	passive transmembrane transporter activity	molecular_function	0.89159	1	131	17460	632	76974	86	45
GO:0005976	polysaccharide metabolic process	biological_process	0.95246	1	135	17460	678	76974	86	49
GO:0044430	cytoskeletal part	cellular_component	0.99943	1	146	17460	802	76974	86	60
GO:0009378	four-way junction helicase activity	molecular_function	0.005812	0.12636	151	17460	543	76974	85	66
GO:0006914	autophagy	biological_process	0.77212	1	167	17460	774	76974	85	82
GO:0005654	nucleoplasm	cellular_component	0.99774	1	141	17460	780	76974	85	56
GO:0044451	nucleoplasm part	cellular_component	0.99774	1	141	17460	780	76974	85	56
GO:0061024	membrane organization	biological_process	0.50083	1	128	17460	568	76974	84	44
GO:0004518	nuclease activity	molecular_function	0.9606	1	164	17460	818	76974	84	80
GO:0044712	single-organism catabolic process	biological_process	0.35796	1	165	17460	709	76974	83	82
GO:0015078	hydrogen ion transmembrane transporter activity	molecular_function	0.74464	1	171	17460	795	76974	83	88
GO:0016627	oxidoreductase activity, acting on the CH-CH group of donors	molecular_function	0.0047997	0.10632	144	17460	523	76974	82	62
GO:0072594	establishment of protein localization to organelle	biological_process	0.60562	1	131	17460	593	76974	82	49
GO:0022402	cell cycle process	biological_process	0.64272	1	145	17460	654	76974	82	63
GO:0034637	cellular carbohydrate biosynthetic process	biological_process	0.99795	1	123	17460	676	76974	82	41
GO:0072521	purine-containing compound metabolic process	biological_process	0.99901	1	171	17460	927	76974	82	89
GO:0032502	developmental process	biological_process	0.92965	1	152	17460	751	76974	81	71
GO:0042626	ATPase activity, coupled to transmembrane movement of substances	molecular_function	0.002532	0.063583	134	17460	472	76974	80	54
GO:0043492	ATPase activity, coupled to movement of substances	molecular_function	0.002532	0.063583	134	17460	472	76974	80	54
GO:0044802	single-organism membrane organization	biological_process	0.34335	1	119	17460	512	76974	80	39
GO:0006163	purine nucleotide metabolic process	biological_process	0.99816	1	166	17460	892	76974	80	86
GO:0031975	envelope	cellular_component	0.92618	1	143	17460	709	76974	79	64
GO:0009259	ribonucleotide metabolic process	biological_process	0.99782	1	164	17460	880	76974	79	85
GO:0042278	purine nucleoside metabolic process	biological_process	0.9967	1	160	17460	852	76974	78	82
GO:0046128	purine ribonucleoside metabolic process	biological_process	0.9967	1	160	17460	852	76974	78	82
GO:0009119	ribonucleoside metabolic process	biological_process	0.99959	1	160	17460	893	76974	78	82
GO:0008509	anion transmembrane transporter activity	molecular_function	0.32686	1	123	17460	521	76974	77	46
GO:0008289	lipid binding	molecular_function	0.33631	1	135	17460	571	76974	77	58
GO:0009108	coenzyme biosynthetic process	biological_process	0.63532	1	114	17460	513	76974	77	37
GO:0009150	purine ribonucleotide metabolic process	biological_process	0.99818	1	162	17460	873	76974	77	85
GO:0031012	extracellular matrix	cellular_component	0.00024139	0.0092159	95	17460	310	76974	76	19
GO:0044767	single-organism developmental process	biological_process	0.8761	1	144	17460	698	76974	76	68
GO:0008194	UDP-glycosyltransferase activity	molecular_function	1	1	115	17460	732	76974	76	39
GO:0016701	oxidoreductase activity, acting on single donors with incorporation of molecular oxygen	molecular_function	0.035301	0.48633	116	17460	437	76974	75	41
GO:0019867	outer membrane	cellular_component	0.12462	1	115	17460	461	76974	75	40
GO:0019028	viral capsid	cellular_component	0.81952	1	142	17460	669	76974	75	67
GO:0030117	membrane coat	cellular_component	0.89968	1	154	17460	736	76974	75	79
GO:0048475	coated membrane	cellular_component	0.89968	1	154	17460	736	76974	75	79
GO:0031967	organelle envelope	cellular_component	0.94857	1	134	17460	676	76974	75	59
GO:0009451	RNA modification	biological_process	0.99557	1	142	17460	748	76974	75	67
GO:0033013	tetrapyrrole metabolic process	biological_process	0.00091472	0.02983	146	17460	510	76974	74	72
GO:0005578	proteinaceous extracellular matrix	cellular_component	0.00023558	0.0091429	90	17460	291	76974	72	18
GO:0048193	Golgi vesicle transport	biological_process	0.86468	1	117	17460	558	76974	72	45
GO:0006818	hydrogen transport	biological_process	0.99497	1	163	17460	858	76974	72	91
GO:0015992	proton transport	biological_process	0.99497	1	163	17460	858	76974	72	91
GO:0007264	small GTPase mediated signal transduction	biological_process	0.99546	1	130	17460	702	76974	71	59
GO:0015291	secondary active transmembrane transporter activity	molecular_function	0.17815	1	130	17460	526	76974	69	61
GO:0071705	nitrogen compound transport	biological_process	0.37361	1	131	17460	571	76974	69	62
GO:0044429	mitochondrial part	cellular_component	0.88238	1	123	17460	607	76974	69	54
GO:0042592	homeostatic process	biological_process	0.56324	1	161	17460	751	76974	68	93
GO:0007186	G-protein coupled receptor signaling pathway	biological_process	0.98155	1	106	17460	571	76974	68	38
GO:0008238	exopeptidase activity	molecular_function	0.059238	0.65609	141	17460	548	76974	67	74
GO:0032446	protein modification by small protein conjugation	biological_process	0.24395	1	94	17460	382	76974	67	27
GO:0031966	mitochondrial membrane	cellular_component	0.79016	1	115	17460	551	76974	67	48
GO:0005740	mitochondrial envelope	cellular_component	0.81315	1	117	17460	565	76974	67	50
GO:0019058	viral life cycle	biological_process	0.82719	1	133	17460	628	76974	67	66
GO:0044264	cellular polysaccharide metabolic process	biological_process	0.95115	1	107	17460	545	76974	67	40
GO:0004872	receptor activity	molecular_function	0.99648	1	116	17460	642	76974	67	49
GO:0016903	oxidoreductase activity, acting on the aldehyde or oxo group of donors	molecular_function	3.0043e-09	2.5651e-07	101	17460	263	76974	66	35
GO:0006928	movement of cell or subcellular component	biological_process	0.014673	0.25807	134	17460	496	76974	66	68
GO:0016567	protein ubiquitination	biological_process	0.14496	1	91	17460	357	76974	66	25
GO:0007010	cytoskeleton organization	biological_process	0.97134	1	137	17460	689	76974	66	71
GO:0034062	RNA polymerase activity	molecular_function	1	1	117	17460	789	76974	66	51
GO:0051213	dioxygenase activity	molecular_function	0.16586	1	93	17460	371	76974	64	29
GO:0008134	transcription factor binding	molecular_function	0.9005	1	136	17460	650	76974	64	72
GO:0009165	nucleotide biosynthetic process	biological_process	0.99086	1	117	17460	626	76974	64	53
GO:1901293	nucleoside phosphate biosynthetic process	biological_process	0.99086	1	117	17460	626	76974	64	53
GO:0038023	signaling receptor activity	molecular_function	0.99651	1	110	17460	613	76974	64	46
GO:0000988	transcription factor activity, protein binding	molecular_function	0.71005	1	115	17460	539	76974	63	52
GO:0006073	cellular glucan metabolic process	biological_process	0.94588	1	103	17460	524	76974	63	40
GO:0044042	glucan metabolic process	biological_process	0.94588	1	103	17460	524	76974	63	40
GO:0006400	tRNA modification	biological_process	0.98029	1	112	17460	576	76974	63	49
GO:0005783	endoplasmic reticulum	cellular_component	0.99751	1	131	17460	728	76974	63	68
GO:0005886	plasma membrane	cellular_component	0.99998	1	114	17460	712	76974	63	51
GO:0016702	oxidoreductase activity, acting on single donors with incorporation of molecular oxygen, incorporation of two atoms of oxygen	molecular_function	0.1316	1	87	17460	341	76974	62	25
GO:0090150	establishment of protein localization to membrane	biological_process	0.4813	1	85	17460	377	76974	61	24
GO:0072657	protein localization to membrane	biological_process	0.51338	1	85	17460	380	76974	61	24
GO:0044707	single-multicellular organism process	biological_process	0.99678	1	113	17460	624	76974	61	52
GO:0040011	locomotion	biological_process	0.17436	1	102	17460	414	76974	60	42
GO:0016071	mRNA metabolic process	biological_process	0.99991	1	110	17460	652	76974	60	50
GO:0000287	magnesium ion binding	molecular_function	1.0965e-11	1.661e-09	165	17460	451	76974	59	106
GO:0016835	carbon-oxygen lyase activity	molecular_function	3.4544e-06	0.00022222	169	17460	541	76974	59	110
GO:0070008	serine-type exopeptidase activity	molecular_function	0.00048919	0.016527	121	17460	404	76974	59	62
GO:0006457	protein folding	biological_process	0.0083202	0.16988	132	17460	489	76974	59	73
GO:0006778	porphyrin-containing compound metabolic process	biological_process	0.0004109	0.0144	106	17460	347	76974	58	48
GO:0048519	negative regulation of biological process	biological_process	0.050965	0.6022	119	17460	458	76974	58	61
GO:0009055	electron carrier activity	molecular_function	0.063875	0.70084	118	17460	479	76974	58	60
GO:0070085	glycosylation	biological_process	0.33905	1	100	17460	421	76974	58	42
GO:0009605	response to external stimulus	biological_process	0.88384	1	94	17460	482	76974	58	36
GO:0042440	pigment metabolic process	biological_process	9.7255e-05	0.0044775	101	17460	317	76974	57	44
GO:0051082	unfolded protein binding	molecular_function	0.1651	1	110	17460	446	76974	57	53
GO:0048856	anatomical structure development	biological_process	0.28465	1	98	17460	412	76974	57	41
GO:1902600	hydrogen ion transmembrane transport	biological_process	0.98076	1	134	17460	696	76974	57	77
GO:0008237	metallopeptidase activity	molecular_function	0.99914	1	88	17460	504	76974	57	31
GO:0015297	antiporter activity	molecular_function	0.026402	0.3936	105	17460	383	76974	56	49
GO:0042802	identical protein binding	molecular_function	0.80936	1	109	17460	510	76974	56	53
GO:0000775	chromosome, centromeric region	cellular_component	0.94174	1	96	17460	483	76974	56	40
GO:0098687	chromosomal region	cellular_component	0.96086	1	96	17460	491	76974	56	40
GO:0046527	glucosyltransferase activity	molecular_function	0.99997	1	90	17460	563	76974	56	34
GO:0019725	cellular homeostasis	biological_process	0.31357	1	126	17460	551	76974	55	71
GO:0044265	cellular macromolecule catabolic process	biological_process	0.99775	1	113	17460	628	76974	55	58
GO:0016628	oxidoreductase activity, acting on the CH-CH group of donors, NAD or NADP as acceptor	molecular_function	8.8015e-05	0.0041749	86	17460	262	76974	54	32
GO:0000003	reproduction	biological_process	0.56944	1	99	17460	448	76974	54	45
GO:0015698	inorganic anion transport	biological_process	0.67632	1	78	17460	354	76974	54	24
GO:0016469	proton-transporting two-sector ATPase complex	cellular_component	0.89974	1	124	17460	611	76974	54	70
GO:0005102	receptor binding	molecular_function	0.97314	1	107	17460	550	76974	54	53
GO:0006366	transcription from RNA polymerase II promoter	biological_process	0.99373	1	106	17460	582	76974	54	52
GO:0015980	energy derivation by oxidation of organic compounds	biological_process	0.1702	1	90	17460	362	76974	53	37
GO:0070972	protein localization to endoplasmic reticulum	biological_process	0.17226	1	74	17460	299	76974	53	21
GO:0009607	response to biotic stimulus	biological_process	0.74602	1	89	17460	442	76974	53	36
GO:0009161	ribonucleoside monophosphate metabolic process	biological_process	0.96997	1	129	17460	662	76974	53	76
GO:0009123	nucleoside monophosphate metabolic process	biological_process	0.97363	1	129	17460	665	76974	53	76
GO:0033692	cellular polysaccharide biosynthetic process	biological_process	0.99901	1	79	17460	468	76974	53	26
GO:0000271	polysaccharide biosynthetic process	biological_process	0.99932	1	79	17460	473	76974	53	26
GO:0004185	serine-type carboxypeptidase activity	molecular_function	1.0782e-05	0.00062511	94	17460	277	76974	52	42
GO:0004180	carboxypeptidase activity	molecular_function	9.3492e-05	0.0043904	96	17460	298	76974	52	44
GO:0045333	cellular respiration	biological_process	0.080892	0.77842	85	17460	327	76974	52	33
GO:0016209	antioxidant activity	molecular_function	0.29921	1	101	17460	435	76974	52	49
GO:0009101	glycoprotein biosynthetic process	biological_process	0.7114	1	79	17460	364	76974	52	27
GO:0009100	glycoprotein metabolic process	biological_process	0.72112	1	79	17460	365	76974	52	27
GO:0009141	nucleoside triphosphate metabolic process	biological_process	0.98337	1	123	17460	646	76974	52	71
GO:0009144	purine nucleoside triphosphate metabolic process	biological_process	0.98337	1	123	17460	646	76974	52	71
GO:0009199	ribonucleoside triphosphate metabolic process	biological_process	0.98337	1	123	17460	646	76974	52	71
GO:0009205	purine ribonucleoside triphosphate metabolic process	biological_process	0.98337	1	123	17460	646	76974	52	71
GO:0006733	oxidoreduction coenzyme metabolic process	biological_process	0.023161	0.35199	91	17460	330	76974	51	40
GO:0030170	pyridoxal phosphate binding	molecular_function	0.27293	1	98	17460	404	76974	51	47
GO:0015849	organic acid transport	biological_process	0.35467	1	92	17460	396	76974	51	41
GO:0046942	carboxylic acid transport	biological_process	0.35467	1	92	17460	396	76974	51	41
GO:0015711	organic anion transport	biological_process	0.37593	1	92	17460	398	76974	51	41
GO:0046034	ATP metabolic process	biological_process	0.96537	1	121	17460	620	76974	51	70
GO:0009126	purine nucleoside monophosphate metabolic process	biological_process	0.97388	1	127	17460	655	76974	51	76
GO:0009167	purine ribonucleoside monophosphate metabolic process	biological_process	0.97388	1	127	17460	655	76974	51	76
GO:0035251	UDP-glucosyltransferase activity	molecular_function	0.99999	1	83	17460	536	76974	51	32
GO:0003899	DNA-directed RNA polymerase activity	molecular_function	1	1	94	17460	653	76974	51	43
GO:0016620	oxidoreductase activity, acting on the aldehyde or oxo group of donors, NAD or NADP as acceptor	molecular_function	8.5763e-10	7.7871e-08	77	17460	180	76974	50	27
GO:0052689	carboxylic ester hydrolase activity	molecular_function	0.0010015	0.031776	110	17460	372	76974	50	60
GO:1901565	organonitrogen compound catabolic process	biological_process	0.014838	0.25903	91	17460	329	76974	50	41
GO:0015103	inorganic anion transmembrane transporter activity	molecular_function	0.19531	1	72	17460	284	76974	50	22
GO:0002949	tRNA threonylcarbamoyladenosine modification	biological_process	0.57912	1	84	17460	369	76974	50	34
GO:0070525	tRNA threonylcarbamoyladenosine metabolic process	biological_process	0.57912	1	84	17460	369	76974	50	34
GO:0006397	mRNA processing	biological_process	0.99887	1	86	17460	498	76974	50	36
GO:0043038	amino acid activation	biological_process	0.9998	1	97	17460	567	76974	50	47
GO:0043039	tRNA aminoacylation	biological_process	0.9998	1	97	17460	567	76974	50	47
GO:0098519	nucleotide phosphatase activity, acting on free nucleotides	molecular_function	0.023747	0.35973	84	17460	299	76974	49	35
GO:0006613	cotranslational protein targeting to membrane	biological_process	0.06689	0.72045	70	17460	265	76974	49	21
GO:0006614	SRP-dependent cotranslational protein targeting to membrane	biological_process	0.06689	0.72045	70	17460	265	76974	49	21
GO:0045047	protein targeting to ER	biological_process	0.086024	0.80152	70	17460	269	76974	49	21
GO:0072599	establishment of protein localization to endoplasmic reticulum	biological_process	0.086024	0.80152	70	17460	269	76974	49	21
GO:0006612	protein targeting to membrane	biological_process	0.096202	0.8605	70	17460	271	76974	49	21
GO:0070925	organelle assembly	biological_process	0.56447	1	76	17460	342	76974	49	27
GO:0003712	transcription cofactor activity	molecular_function	0.6365	1	91	17460	423	76974	49	42
GO:0000989	transcription factor activity, transcription factor binding	molecular_function	0.66413	1	91	17460	426	76974	49	42
GO:0004252	serine-type endopeptidase activity	molecular_function	0.96516	1	112	17460	572	76974	49	63
GO:0006352	DNA-templated transcription, initiation	biological_process	0.99865	1	80	17460	470	76974	49	31
GO:0009250	glucan biosynthetic process	biological_process	0.99895	1	75	17460	447	76974	49	26
GO:0048518	positive regulation of biological process	biological_process	0.99958	1	82	17460	495	76974	49	33
GO:0009308	amine metabolic process	biological_process	0.072816	0.75318	84	17460	319	76974	48	36
GO:0001871	pattern binding	molecular_function	0.23497	1	77	17460	311	76974	48	29
GO:0030247	polysaccharide binding	molecular_function	0.23497	1	77	17460	311	76974	48	29
GO:0006325	chromatin organization	biological_process	0.29531	1	83	17460	351	76974	48	35
GO:0022613	ribonucleoprotein complex biogenesis	biological_process	0.55789	1	87	17460	390	76974	48	39
GO:0048523	negative regulation of cellular process	biological_process	0.0029081	0.068833	104	17460	358	76974	47	57
GO:0033014	tetrapyrrole biosynthetic process	biological_process	0.061817	0.68144	96	17460	366	76974	47	49
GO:0005507	copper ion binding	molecular_function	0.22823	1	78	17460	318	76974	47	31
GO:0022836	gated channel activity	molecular_function	0.97909	1	73	17460	393	76974	47	26
GO:0016830	carbon-carbon lyase activity	molecular_function	0.99124	1	101	17460	550	76974	47	54
GO:0016875	ligase activity, forming carbon-oxygen bonds	molecular_function	0.99993	1	93	17460	560	76974	47	46
GO:0016876	ligase activity, forming aminoacyl-tRNA and related compounds	molecular_function	0.99993	1	93	17460	560	76974	47	46
GO:0048870	cell motility	biological_process	0.010835	0.21056	81	17460	281	76974	46	35
GO:0051674	localization of cell	biological_process	0.010835	0.21056	81	17460	281	76974	46	35
GO:0016568	chromatin modification	biological_process	0.29532	1	71	17460	298	76974	46	25
GO:0030163	protein catabolic process	biological_process	0.98982	1	88	17460	482	76974	46	42
GO:0006418	tRNA aminoacylation for protein translation	biological_process	0.99973	1	89	17460	523	76974	46	43
GO:0071949	FAD binding	molecular_function	0.00016699	0.0068786	111	17460	355	76974	45	66
GO:0071554	cell wall organization or biogenesis	biological_process	0.0094543	0.18973	78	17460	270	76974	45	33
GO:0042995	cell projection	cellular_component	0.15304	1	78	17460	307	76974	45	33
GO:0019439	aromatic compound catabolic process	biological_process	0.22557	1	85	17460	349	76974	45	40
GO:1901361	organic cyclic compound catabolic process	biological_process	0.30969	1	85	17460	359	76974	45	40
GO:0048869	cellular developmental process	biological_process	0.32114	1	82	17460	345	76974	45	37
GO:0042254	ribosome biogenesis	biological_process	0.42977	1	83	17460	361	76974	45	38
GO:0003779	actin binding	molecular_function	0.66164	1	80	17460	365	76974	45	35
GO:0006486	protein glycosylation	biological_process	0.81624	1	71	17460	340	76974	45	26
GO:0043413	macromolecule glycosylation	biological_process	0.81624	1	71	17460	340	76974	45	26
GO:0051301	cell division	biological_process	0.94333	1	76	17460	391	76974	45	31
GO:0051273	beta-glucan metabolic process	biological_process	0.99983	1	71	17460	448	76974	45	26
GO:0044257	cellular protein catabolic process	biological_process	0.98374	1	86	17460	464	76974	44	42
GO:0051603	proteolysis involved in cellular protein catabolic process	biological_process	0.98374	1	86	17460	464	76974	44	42
GO:0048522	positive regulation of cellular process	biological_process	0.99948	1	77	17460	467	76974	44	33
GO:0051274	beta-glucan biosynthetic process	biological_process	0.99957	1	69	17460	427	76974	44	25
GO:0004812	aminoacyl-tRNA ligase activity	molecular_function	0.99986	1	89	17460	531	76974	44	45
GO:0005516	calmodulin binding	molecular_function	0.00034766	0.012656	50	17460	138	76974	43	7
GO:0016836	hydro-lyase activity	molecular_function	0.029342	0.42925	78	17460	282	76974	43	35
GO:0009653	anatomical structure morphogenesis	biological_process	0.23313	1	74	17460	304	76974	43	31
GO:0044270	cellular nitrogen compound catabolic process	biological_process	0.32207	1	84	17460	356	76974	43	41
GO:0031410	cytoplasmic vesicle	cellular_component	0.51527	1	80	17460	348	76974	43	37
GO:0016052	carbohydrate catabolic process	biological_process	0.51613	1	89	17460	392	76974	43	46
GO:0031982	vesicle	cellular_component	0.56012	1	80	17460	352	76974	43	37
GO:0008234	cysteine-type peptidase activity	molecular_function	0.9277	1	74	17460	379	76974	43	31
GO:0006865	amino acid transport	biological_process	0.037719	0.50753	70	17460	254	76974	42	28
GO:0004616	phosphogluconate dehydrogenase (decarboxylating) activity	molecular_function	0.040781	0.52757	59	17460	211	76974	42	17
GO:0072524	pyridine-containing compound metabolic process	biological_process	0.067605	0.72348	82	17460	309	76974	42	40
GO:0016023	cytoplasmic membrane-bounded vesicle	cellular_component	0.50911	1	79	17460	343	76974	42	37
GO:0031988	membrane-bounded vesicle	cellular_component	0.55435	1	79	17460	347	76974	42	37
GO:0004222	metalloendopeptidase activity	molecular_function	0.95421	1	63	17460	327	76974	42	21
GO:0006511	ubiquitin-dependent protein catabolic process	biological_process	0.96497	1	76	17460	400	76974	42	34
GO:0019941	modification-dependent protein catabolic process	biological_process	0.9689	1	76	17460	402	76974	42	34
GO:0043632	modification-dependent macromolecule catabolic process	biological_process	0.9689	1	76	17460	402	76974	42	34
GO:0003857	3-hydroxyacyl-CoA dehydrogenase activity	molecular_function	0.0023642	0.060337	78	17460	255	76974	41	37
GO:0019362	pyridine nucleotide metabolic process	biological_process	0.034707	0.48508	80	17460	291	76974	41	39
GO:0046496	nicotinamide nucleotide metabolic process	biological_process	0.034707	0.48508	80	17460	291	76974	41	39
GO:0016410	N-acyltransferase activity	molecular_function	0.036229	0.49171	62	17460	224	76974	41	21
GO:0004527	exonuclease activity	molecular_function	0.28948	1	79	17460	328	76974	41	38
GO:0046700	heterocycle catabolic process	biological_process	0.35299	1	81	17460	346	76974	41	40
GO:0015631	tubulin binding	molecular_function	0.76883	1	104	17460	480	76974	41	63
GO:0015988	energy coupled proton transmembrane transport, against electrochemical gradient	biological_process	0.78995	1	91	17460	433	76974	41	50
GO:0015991	ATP hydrolysis coupled proton transport	biological_process	0.78995	1	91	17460	433	76974	41	50
GO:0072522	purine-containing compound biosynthetic process	biological_process	0.99988	1	84	17460	523	76974	41	43
GO:0000160	phosphorelay signal transduction system	biological_process	0.031058	0.45294	88	17460	321	76974	40	48
GO:0016407	acetyltransferase activity	molecular_function	0.050415	0.6022	59	17460	218	76974	40	19
GO:0045454	cell redox homeostasis	biological_process	0.10014	0.879	96	17460	387	76974	40	56
GO:0044448	cell cortex part	cellular_component	0.51819	1	62	17460	269	76974	40	22
GO:0005938	cell cortex	cellular_component	0.54067	1	63	17460	275	76974	40	23
GO:0060589	nucleoside-triphosphatase regulator activity	molecular_function	0.68142	1	71	17460	330	76974	40	31
GO:0044455	mitochondrial membrane part	cellular_component	0.68928	1	70	17460	332	76974	40	30
GO:0007275	multicellular organismal development	biological_process	0.80174	1	68	17460	332	76974	40	28
GO:0006261	DNA-dependent DNA replication	biological_process	0.99774	1	79	17460	476	76974	40	39
GO:0030312	external encapsulating structure	cellular_component	0.00025849	0.0097894	89	17460	281	76974	39	50
GO:0004857	enzyme inhibitor activity	molecular_function	0.010112	0.20036	83	17460	300	76974	39	44
GO:1903825	organic acid transmembrane transport	biological_process	0.039529	0.51707	63	17460	226	76974	39	24
GO:0098656	anion transmembrane transport	biological_process	0.042964	0.54236	63	17460	227	76974	39	24
GO:0051536	iron-sulfur cluster binding	molecular_function	0.098427	0.8721	83	17460	324	76974	39	44
GO:0051540	metal cluster binding	molecular_function	0.098427	0.8721	83	17460	324	76974	39	44
GO:0098798	mitochondrial protein complex	cellular_component	0.68423	1	69	17460	327	76974	39	30
GO:0044459	plasma membrane part	cellular_component	0.99524	1	75	17460	437	76974	39	36
GO:0006164	purine nucleotide biosynthetic process	biological_process	0.99972	1	79	17460	488	76974	39	40
GO:0043648	dicarboxylic acid metabolic process	biological_process	0.0011441	0.035347	71	17460	226	76974	38	33
GO:0072330	monocarboxylic acid biosynthetic process	biological_process	0.01324	0.24192	123	17460	447	76974	38	85
GO:0008080	N-acetyltransferase activity	molecular_function	0.019432	0.31038	57	17460	198	76974	38	19
GO:0003333	amino acid transmembrane transport	biological_process	0.040975	0.52768	62	17460	222	76974	38	24
GO:0000902	cell morphogenesis	biological_process	0.058121	0.64677	65	17460	239	76974	38	27
GO:0032989	cellular component morphogenesis	biological_process	0.058121	0.64677	65	17460	239	76974	38	27
GO:0016684	oxidoreductase activity, acting on peroxide as acceptor	molecular_function	0.25694	1	61	17460	254	76974	38	23
GO:0019031	viral envelope	cellular_component	0.67981	1	80	17460	367	76974	38	42
GO:0036338	viral membrane	cellular_component	0.67981	1	80	17460	367	76974	38	42
GO:0044433	cytoplasmic vesicle part	cellular_component	0.70524	1	69	17460	315	76974	38	31
GO:0000776	kinetochore	cellular_component	0.83578	1	67	17460	326	76974	38	29
GO:0009311	oligosaccharide metabolic process	biological_process	0.89473	1	79	17460	389	76974	38	41
GO:0009260	ribonucleotide biosynthetic process	biological_process	0.99966	1	77	17460	476	76974	38	39
GO:0046390	ribose phosphate biosynthetic process	biological_process	0.99966	1	77	17460	476	76974	38	39
GO:0015979	photosynthesis	biological_process	0.00012153	0.0052841	144	17460	504	76974	37	107
GO:0009892	negative regulation of metabolic process	biological_process	0.059194	0.65609	87	17460	328	76974	37	50
GO:0030133	transport vesicle	cellular_component	0.16569	1	70	17460	273	76974	37	33
GO:0006364	rRNA processing	biological_process	0.28725	1	66	17460	273	76974	37	29
GO:0016072	rRNA metabolic process	biological_process	0.28725	1	66	17460	273	76974	37	29
GO:0004673	protein histidine kinase activity	molecular_function	0.51576	1	59	17460	257	76974	37	22
GO:0016775	phosphotransferase activity, nitrogenous group as acceptor	molecular_function	0.51576	1	59	17460	257	76974	37	22
GO:0030120	vesicle coat	cellular_component	0.68455	1	67	17460	304	76974	37	30
GO:0030135	coated vesicle	cellular_component	0.68455	1	67	17460	304	76974	37	30
GO:0030662	coated vesicle membrane	cellular_component	0.68455	1	67	17460	304	76974	37	30
GO:0030659	cytoplasmic vesicle membrane	cellular_component	0.70094	1	68	17460	310	76974	37	31
GO:0012506	vesicle membrane	cellular_component	0.74052	1	68	17460	314	76974	37	31
GO:0031683	G-protein beta/gamma-subunit complex binding	molecular_function	0.7878	1	56	17460	271	76974	37	19
GO:0005794	Golgi apparatus	cellular_component	0.79291	1	68	17460	324	76974	37	31
GO:0006270	DNA replication initiation	biological_process	0.84551	1	71	17460	347	76974	37	34
GO:0030243	cellulose metabolic process	biological_process	0.90691	1	62	17460	309	76974	37	25
GO:0016831	carboxy-lyase activity	molecular_function	0.98752	1	77	17460	426	76974	37	40
GO:0042451	purine nucleoside biosynthetic process	biological_process	0.99978	1	73	17460	459	76974	37	36
GO:0046129	purine ribonucleoside biosynthetic process	biological_process	0.99978	1	73	17460	459	76974	37	36
GO:0044432	endoplasmic reticulum part	cellular_component	0.99988	1	74	17460	479	76974	37	37
GO:0009163	nucleoside biosynthetic process	biological_process	0.99999	1	73	17460	498	76974	37	36
GO:0042455	ribonucleoside biosynthetic process	biological_process	0.99999	1	73	17460	498	76974	37	36
GO:1901659	glycosyl compound biosynthetic process	biological_process	0.99999	1	73	17460	499	76974	37	36
GO:0006633	fatty acid biosynthetic process	biological_process	0.0079822	0.16406	118	17460	420	76974	36	82
GO:0004601	peroxidase activity	molecular_function	0.26468	1	59	17460	246	76974	36	23
GO:0005057	receptor signaling protein activity	molecular_function	0.45841	1	57	17460	243	76974	36	21
GO:0030244	cellulose biosynthetic process	biological_process	0.83627	1	60	17460	288	76974	36	24
GO:0007017	microtubule-based process	biological_process	0.90112	1	97	17460	473	76974	36	61
GO:0032940	secretion by cell	biological_process	0.97004	1	63	17460	336	76974	36	27
GO:0046903	secretion	biological_process	0.97632	1	63	17460	340	76974	36	27
GO:0032259	methylation	biological_process	0.99801	1	76	17460	450	76974	36	40
GO:0009152	purine ribonucleotide biosynthetic process	biological_process	0.99976	1	75	17460	469	76974	36	39
GO:0061695	transferase complex, transferring phosphorus-containing groups	cellular_component	0.99999	1	63	17460	441	76974	36	27
GO:0009066	aspartate family amino acid metabolic process	biological_process	0.013712	0.24862	66	17460	226	76974	35	31
GO:1901681	sulfur compound binding	molecular_function	0.031582	0.45762	53	17460	183	76974	35	18
GO:0010605	negative regulation of macromolecule metabolic process	biological_process	0.044473	0.55693	83	17460	306	76974	35	48
GO:0005741	mitochondrial outer membrane	cellular_component	0.5783	1	53	17460	240	76974	35	18
GO:0031968	organelle outer membrane	cellular_component	0.5783	1	53	17460	240	76974	35	18
GO:0016810	hydrolase activity, acting on carbon-nitrogen (but not peptide) bonds	molecular_function	0.74891	1	55	17460	264	76974	35	20
GO:0006644	phospholipid metabolic process	biological_process	0.99989	1	61	17460	401	76974	35	26
GO:0010033	response to organic substance	biological_process	0.00042108	0.014647	87	17460	278	76974	34	53
GO:0009067	aspartate family amino acid biosynthetic process	biological_process	0.0025009	0.063483	60	17460	189	76974	34	26
GO:0006576	cellular biogenic amine metabolic process	biological_process	0.22271	1	59	17460	237	76974	34	25
GO:0044106	cellular amine metabolic process	biological_process	0.22271	1	59	17460	237	76974	34	25
GO:0030658	transport vesicle membrane	cellular_component	0.28633	1	63	17460	255	76974	34	29
GO:0006888	ER to Golgi vesicle-mediated transport	biological_process	0.3809	1	61	17460	255	76974	34	27
GO:0000155	phosphorelay sensor kinase activity	molecular_function	0.5841	1	50	17460	221	76974	34	16
GO:0033176	proton-transporting V-type ATPase complex	cellular_component	0.74019	1	83	17460	388	76974	34	49
GO:0051258	protein polymerization	biological_process	0.98779	1	58	17460	325	76974	34	24
GO:0005789	endoplasmic reticulum membrane	cellular_component	0.99994	1	68	17460	456	76974	34	34
GO:0032268	regulation of cellular protein metabolic process	biological_process	0.99996	1	86	17460	533	76974	34	52
GO:0042175	nuclear outer membrane-endoplasmic reticulum membrane network	cellular_component	0.99997	1	68	17460	462	76974	34	34
GO:0051246	regulation of protein metabolic process	biological_process	0.99999	1	86	17460	544	76974	34	52
GO:0045229	external encapsulating structure organization	biological_process	0.0036395	0.083092	58	17460	184	76974	33	25
GO:0009579	thylakoid	cellular_component	0.014509	0.25615	114	17460	441	76974	33	81
GO:0044436	thylakoid part	cellular_component	0.014509	0.25615	114	17460	441	76974	33	81
GO:0005543	phospholipid binding	molecular_function	0.12732	1	57	17460	216	76974	33	24
GO:0016638	oxidoreductase activity, acting on the CH-NH2 group of donors	molecular_function	0.16728	1	63	17460	247	76974	33	30
GO:0015074	DNA integration	biological_process	0.60322	1	59	17460	261	76974	33	26
GO:0042803	protein homodimerization activity	molecular_function	0.7909	1	67	17460	319	76974	33	34
GO:0005996	monosaccharide metabolic process	biological_process	0.80012	1	69	17460	330	76974	33	36
GO:0036459	ubiquitinyl hydrolase activity	molecular_function	0.85403	1	51	17460	249	76974	33	18
GO:0019866	organelle inner membrane	cellular_component	0.85539	1	63	17460	319	76974	33	30
GO:0034357	photosynthetic membrane	cellular_component	0.019563	0.31142	110	17460	429	76974	32	78
GO:0019842	vitamin binding	molecular_function	0.10401	0.90601	45	17460	164	76974	32	13
GO:0019079	viral genome replication	biological_process	0.26129	1	56	17460	224	76974	32	24
GO:0012507	ER to Golgi transport vesicle membrane	cellular_component	0.38711	1	57	17460	237	76974	32	25
GO:0030127	COPII vesicle coat	cellular_component	0.38711	1	57	17460	237	76974	32	25
GO:0030134	ER to Golgi transport vesicle	cellular_component	0.38711	1	57	17460	237	76974	32	25
GO:0065004	protein-DNA complex assembly	biological_process	0.60041	1	54	17460	247	76974	32	22
GO:0071824	protein-DNA complex subunit organization	biological_process	0.60041	1	54	17460	247	76974	32	22
GO:0005743	mitochondrial inner membrane	cellular_component	0.80693	1	62	17460	308	76974	32	30
GO:0044431	Golgi apparatus part	cellular_component	0.92385	1	58	17460	298	76974	32	26
GO:0008135	translation factor activity, RNA binding	molecular_function	0.98374	1	66	17460	368	76974	32	34
GO:0004519	endonuclease activity	molecular_function	0.98627	1	68	17460	381	76974	32	36
GO:0017038	protein import	biological_process	0.98947	1	60	17460	339	76974	32	28
GO:0015630	microtubule cytoskeleton	cellular_component	0.9997	1	62	17460	390	76974	32	30
GO:0071555	cell wall organization	biological_process	0.0057481	0.12555	56	17460	180	76974	31	25
GO:0006779	porphyrin-containing compound biosynthetic process	biological_process	0.08002	0.7732	56	17460	206	76974	31	25
GO:0016311	dephosphorylation	biological_process	0.29381	1	43	17460	174	76974	31	12
GO:0007005	mitochondrion organization	biological_process	0.45534	1	55	17460	239	76974	31	24
GO:0018193	peptidyl-amino acid modification	biological_process	0.48962	1	66	17460	295	76974	31	35
GO:0006575	cellular modified amino acid metabolic process	biological_process	0.75907	1	57	17460	270	76974	31	26
GO:0043566	structure-specific DNA binding	molecular_function	0.93975	1	73	17460	371	76974	31	42
GO:0033177	proton-transporting two-sector ATPase complex, proton-transporting domain	cellular_component	0.94755	1	75	17460	393	76974	31	44
GO:0016485	protein processing	biological_process	0.99978	1	73	17460	462	76974	31	42
GO:0051604	protein maturation	biological_process	0.99978	1	73	17460	462	76974	31	42
GO:0009893	positive regulation of metabolic process	biological_process	0.99991	1	53	17460	356	76974	31	22
GO:0009405	pathogenesis	biological_process	0.99997	1	66	17460	456	76974	31	35
GO:0004190	aspartic-type endopeptidase activity	molecular_function	1	1	66	17460	469	76974	31	35
GO:0070001	aspartic-type peptidase activity	molecular_function	1	1	66	17460	469	76974	31	35
GO:0009521	photosystem	cellular_component	0.011691	0.21912	105	17460	401	76974	30	75
GO:0046148	pigment biosynthetic process	biological_process	0.080863	0.77842	51	17460	186	76974	30	21
GO:0008643	carbohydrate transport	biological_process	0.30513	1	42	17460	177	76974	30	12
GO:0015079	potassium ion transmembrane transporter activity	molecular_function	0.30544	1	50	17460	204	76974	30	20
GO:0004721	phosphoprotein phosphatase activity	molecular_function	0.34436	1	39	17460	160	76974	30	9
GO:0051382	kinetochore assembly	biological_process	0.46309	1	43	17460	186	76974	30	13
GO:0051383	kinetochore organization	biological_process	0.46309	1	43	17460	186	76974	30	13
GO:0000910	cytokinesis	biological_process	0.4796	1	51	17460	222	76974	30	21
GO:0006979	response to oxidative stress	biological_process	0.572	1	50	17460	235	76974	30	20
GO:0016579	protein deubiquitination	biological_process	0.64395	1	48	17460	215	76974	30	18
GO:0070646	protein modification by small protein removal	biological_process	0.64395	1	48	17460	215	76974	30	18
GO:0034508	centromere complex assembly	biological_process	0.65713	1	43	17460	200	76974	30	13
GO:0034061	DNA polymerase activity	molecular_function	0.77219	1	62	17460	293	76974	30	32
GO:0005984	disaccharide metabolic process	biological_process	0.86246	1	62	17460	303	76974	30	32
GO:0048285	organelle fission	biological_process	0.90102	1	47	17460	245	76974	30	17
GO:0006887	exocytosis	biological_process	0.93	1	48	17460	247	76974	30	18
GO:0016759	cellulose synthase activity	molecular_function	0.96071	1	51	17460	270	76974	30	21
GO:0016760	cellulose synthase (UDP-forming) activity	molecular_function	0.96071	1	51	17460	270	76974	30	21
GO:0051128	regulation of cellular component organization	biological_process	0.98364	1	45	17460	261	76974	30	15
GO:0007059	chromosome segregation	biological_process	0.99551	1	54	17460	320	76974	30	24
GO:0043414	macromolecule methylation	biological_process	0.99737	1	60	17460	366	76974	30	30
GO:0006855	drug transmembrane transport	biological_process	0.0012709	0.03707	62	17460	189	76974	29	33
GO:0015238	drug transmembrane transporter activity	molecular_function	0.0012709	0.03707	62	17460	189	76974	29	33
GO:0015893	drug transport	biological_process	0.0012709	0.03707	62	17460	189	76974	29	33
GO:0090484	drug transporter activity	molecular_function	0.0012709	0.03707	62	17460	189	76974	29	33
GO:0042493	response to drug	biological_process	0.0016995	0.046945	62	17460	191	76974	29	33
GO:0015948	methanogenesis	biological_process	0.0022084	0.057297	44	17460	129	76974	29	15
GO:0015975	energy derivation by oxidation of reduced inorganic compounds	biological_process	0.0022084	0.057297	44	17460	129	76974	29	15
GO:0043447	alkane biosynthetic process	biological_process	0.0022084	0.057297	44	17460	129	76974	29	15
GO:0009061	anaerobic respiration	biological_process	0.002554	0.063797	44	17460	130	76974	29	15
GO:0015947	methane metabolic process	biological_process	0.002621	0.0647	44	17460	130	76974	29	15
GO:0043446	cellular alkane metabolic process	biological_process	0.002621	0.0647	44	17460	130	76974	29	15
GO:0030976	thiamine pyrophosphate binding	molecular_function	0.041647	0.53001	39	17460	130	76974	29	10
GO:0006470	protein dephosphorylation	biological_process	0.2576	1	41	17460	163	76974	29	12
GO:0010876	lipid localization	biological_process	0.40078	1	49	17460	210	76974	29	20
GO:0008017	microtubule binding	molecular_function	0.4164	1	81	17460	344	76974	29	52
GO:0032506	cytokinetic process	biological_process	0.53353	1	49	17460	217	76974	29	20
GO:0090529	cell septum assembly	biological_process	0.53353	1	49	17460	217	76974	29	20
GO:0000280	nuclear division	biological_process	0.75747	1	44	17460	211	76974	29	15
GO:0019954	asexual reproduction	biological_process	0.80237	1	52	17460	258	76974	29	23
GO:0000228	nuclear chromosome	cellular_component	0.87021	1	60	17460	300	76974	29	31
GO:0003774	motor activity	molecular_function	0.876	1	68	17460	331	76974	29	39
GO:0004888	transmembrane signaling receptor activity	molecular_function	0.99972	1	54	17460	364	76974	29	25
GO:0005618	cell wall	cellular_component	4.0554e-05	0.0019772	68	17460	193	76974	28	40
GO:0015994	chlorophyll metabolic process	biological_process	4.0842e-05	0.0019772	50	17460	132	76974	28	22
GO:0006553	lysine metabolic process	biological_process	0.00082725	0.027166	51	17460	150	76974	28	23
GO:0071804	cellular potassium ion transport	biological_process	0.022491	0.34453	46	17460	152	76974	28	18
GO:0071805	potassium ion transmembrane transport	biological_process	0.022491	0.34453	46	17460	152	76974	28	18
GO:0006783	heme biosynthetic process	biological_process	0.053674	0.61335	48	17460	169	76974	28	20
GO:0042168	heme metabolic process	biological_process	0.074595	0.75987	49	17460	177	76974	28	21
GO:0031514	motile cilium	cellular_component	0.075181	0.76253	53	17460	192	76974	28	25
GO:0005929	cilium	cellular_component	0.091843	0.83101	53	17460	195	76974	28	25
GO:0006869	lipid transport	biological_process	0.26344	1	48	17460	196	76974	28	20
GO:0006915	apoptotic process	biological_process	0.41763	1	41	17460	174	76974	28	13
GO:0012501	programmed cell death	biological_process	0.41763	1	41	17460	174	76974	28	13
GO:0008219	cell death	biological_process	0.48145	1	41	17460	178	76974	28	13
GO:0016265	death	biological_process	0.48145	1	41	17460	178	76974	28	13
GO:0008514	organic anion transmembrane transporter activity	molecular_function	0.48696	1	52	17460	230	76974	28	24
GO:0009312	oligosaccharide biosynthetic process	biological_process	0.72523	1	51	17460	241	76974	28	23
GO:0030695	GTPase regulator activity	molecular_function	0.79403	1	41	17460	198	76974	28	13
GO:0006357	regulation of transcription from RNA polymerase II promoter	biological_process	0.94031	1	60	17460	321	76974	28	32
GO:0019318	hexose metabolic process	biological_process	0.9594	1	56	17460	299	76974	28	28
GO:0007155	cell adhesion	biological_process	0.98857	1	53	17460	302	76974	28	25
GO:0022610	biological adhesion	biological_process	0.9902	1	55	17460	314	76974	28	27
GO:0000428	DNA-directed RNA polymerase complex	cellular_component	0.99999	1	46	17460	341	76974	28	18
GO:0030880	RNA polymerase complex	cellular_component	0.99999	1	46	17460	341	76974	28	18
GO:0055029	nuclear DNA-directed RNA polymerase complex	cellular_component	0.99999	1	46	17460	341	76974	28	18
GO:0015996	chlorophyll catabolic process	biological_process	1.0573e-05	0.00062062	49	17460	123	76974	27	22
GO:0047746	chlorophyllase activity	molecular_function	1.0573e-05	0.00062062	49	17460	123	76974	27	22
GO:0046149	pigment catabolic process	biological_process	1.7142e-05	0.00095833	49	17460	125	76974	27	22
GO:0006787	porphyrin-containing compound catabolic process	biological_process	3.3205e-05	0.0017719	50	17460	131	76974	27	23
GO:0033015	tetrapyrrole catabolic process	biological_process	3.3205e-05	0.0017719	50	17460	131	76974	27	23
GO:0051187	cofactor catabolic process	biological_process	4.2105e-05	0.0020176	50	17460	132	76974	27	23
GO:0009085	lysine biosynthetic process	biological_process	0.00017726	0.0071147	46	17460	125	76974	27	19
GO:0009089	lysine biosynthetic process via diaminopimelate	biological_process	0.00017726	0.0071147	46	17460	125	76974	27	19
GO:0046451	diaminopimelate metabolic process	biological_process	0.00017726	0.0071147	46	17460	125	76974	27	19
GO:0031324	negative regulation of cellular metabolic process	biological_process	0.0016689	0.046373	74	17460	237	76974	27	47
GO:0010629	negative regulation of gene expression	biological_process	0.037639	0.50753	63	17460	223	76974	27	36
GO:0019898	extrinsic component of membrane	cellular_component	0.045987	0.56981	72	17460	270	76974	27	45
GO:0004536	deoxyribonuclease activity	molecular_function	0.16602	1	51	17460	199	76974	27	24
GO:0048583	regulation of response to stimulus	biological_process	0.28741	1	57	17460	234	76974	27	30
GO:0000793	condensed chromosome	cellular_component	0.32715	1	61	17460	253	76974	27	34
GO:0005342	organic acid transmembrane transporter activity	molecular_function	0.35027	1	49	17460	208	76974	27	22
GO:0046943	carboxylic acid transmembrane transporter activity	molecular_function	0.35027	1	49	17460	208	76974	27	22
GO:0009072	aromatic amino acid family metabolic process	biological_process	0.36356	1	39	17460	161	76974	27	12
GO:0043093	FtsZ-dependent cytokinesis	biological_process	0.49908	1	47	17460	206	76974	27	20
GO:0032505	reproduction of a single-celled organism	biological_process	0.51453	1	47	17460	207	76974	27	20
GO:0015298	solute:cation antiporter activity	molecular_function	0.57028	1	41	17460	180	76974	27	14
GO:0015299	solute:proton antiporter activity	molecular_function	0.57028	1	41	17460	180	76974	27	14
GO:0061630	ubiquitin protein ligase activity	molecular_function	0.70678	1	38	17460	177	76974	27	11
GO:0061659	ubiquitin-like protein ligase activity	molecular_function	0.70678	1	38	17460	177	76974	27	11
GO:0071103	DNA conformation change	biological_process	0.82876	1	51	17460	250	76974	27	24
GO:0030674	protein binding, bridging	molecular_function	0.85302	1	43	17460	215	76974	27	16
GO:0060090	binding, bridging	molecular_function	0.85302	1	43	17460	215	76974	27	16
GO:0031325	positive regulation of cellular metabolic process	biological_process	0.99995	1	49	17460	339	76974	27	22
GO:0009719	response to endogenous stimulus	biological_process	0.00069584	0.023341	70	17460	219	76974	26	44
GO:0016667	oxidoreductase activity, acting on a sulfur group of donors	molecular_function	0.54147	1	44	17460	204	76974	26	18
GO:0008171	O-methyltransferase activity	molecular_function	0.5637	1	41	17460	188	76974	26	15
GO:0006367	transcription initiation from RNA polymerase II promoter	biological_process	0.93004	1	44	17460	232	76974	26	18
GO:0044454	nuclear chromosome part	cellular_component	0.93159	1	51	17460	269	76974	26	25
GO:0030684	preribosome	cellular_component	0.97767	1	44	17460	248	76974	26	18
GO:0016591	DNA-directed RNA polymerase II, holoenzyme	cellular_component	0.99951	1	42	17460	282	76974	26	16
GO:0009725	response to hormone	biological_process	0.00036219	0.012983	69	17460	211	76974	25	44
GO:0019354	siroheme biosynthetic process	biological_process	0.020964	0.32707	43	17460	141	76974	25	18
GO:0043115	precorrin-2 dehydrogenase activity	molecular_function	0.020964	0.32707	43	17460	141	76974	25	18
GO:0046156	siroheme metabolic process	biological_process	0.020964	0.32707	43	17460	141	76974	25	18
GO:1901136	carbohydrate derivative catabolic process	biological_process	0.081851	0.78444	44	17460	160	76974	25	19
GO:0004497	monooxygenase activity	molecular_function	0.12776	1	59	17460	225	76974	25	34
GO:0015171	amino acid transmembrane transporter activity	molecular_function	0.24755	1	43	17460	172	76974	25	18
GO:0016597	amino acid binding	molecular_function	0.47929	1	52	17460	224	76974	25	27
GO:0031406	carboxylic acid binding	molecular_function	0.54979	1	52	17460	229	76974	25	27
GO:0043177	organic acid binding	molecular_function	0.54979	1	52	17460	229	76974	25	27
GO:0098800	inner mitochondrial membrane protein complex	cellular_component	0.57865	1	49	17460	228	76974	25	24
GO:0016569	covalent chromatin modification	biological_process	0.70573	1	40	17460	189	76974	25	15
GO:0016570	histone modification	biological_process	0.70573	1	40	17460	189	76974	25	15
GO:0042398	cellular modified amino acid biosynthetic process	biological_process	0.87173	1	44	17460	221	76974	25	19
GO:0005615	extracellular space	cellular_component	0.92262	1	59	17460	303	76974	25	34
GO:0015629	actin cytoskeleton	cellular_component	0.98851	1	40	17460	235	76974	25	15
GO:0008380	RNA splicing	biological_process	0.99785	1	41	17460	262	76974	25	16
GO:0016151	nickel cation binding	molecular_function	0.0060696	0.12897	45	17460	140	76974	24	21
GO:0009628	response to abiotic stimulus	biological_process	0.0065344	0.13822	32	17460	93	76974	24	8
GO:0004725	protein tyrosine phosphatase activity	molecular_function	0.13073	1	32	17460	116	76974	24	8
GO:0015144	carbohydrate transmembrane transporter activity	molecular_function	0.13501	1	36	17460	138	76974	24	12
GO:1901476	carbohydrate transporter activity	molecular_function	0.13501	1	36	17460	138	76974	24	12
GO:0016645	oxidoreductase activity, acting on the CH-NH group of donors	molecular_function	0.21258	1	47	17460	184	76974	24	23
GO:0016877	ligase activity, forming carbon-sulfur bonds	molecular_function	0.42916	1	37	17460	155	76974	24	13
GO:0065009	regulation of molecular function	biological_process	0.48303	1	51	17460	224	76974	24	27
GO:0010941	regulation of cell death	biological_process	0.49736	1	35	17460	152	76974	24	11
GO:0042981	regulation of apoptotic process	biological_process	0.49736	1	35	17460	152	76974	24	11
GO:0043067	regulation of programmed cell death	biological_process	0.49736	1	35	17460	152	76974	24	11
GO:0006313	transposition, DNA-mediated	biological_process	0.70983	1	46	17460	213	76974	24	22
GO:0032196	transposition	biological_process	0.70983	1	46	17460	213	76974	24	22
GO:0000145	exocyst	cellular_component	0.73271	1	38	17460	177	76974	24	14
GO:0006814	sodium ion transport	biological_process	0.83915	1	36	17460	188	76974	24	12
GO:0003682	chromatin binding	molecular_function	0.90128	1	38	17460	197	76974	24	14
GO:0033865	nucleoside bisphosphate metabolic process	biological_process	0.91712	1	32	17460	170	76974	24	8
GO:0033875	ribonucleoside bisphosphate metabolic process	biological_process	0.91712	1	32	17460	170	76974	24	8
GO:0034032	purine nucleoside bisphosphate metabolic process	biological_process	0.91712	1	32	17460	170	76974	24	8
GO:0015276	ligand-gated ion channel activity	molecular_function	0.94775	1	42	17460	229	76974	24	18
GO:0022834	ligand-gated channel activity	molecular_function	0.94775	1	42	17460	229	76974	24	18
GO:0070840	dynein complex binding	molecular_function	0.96702	1	47	17460	257	76974	24	23
GO:0006913	nucleocytoplasmic transport	biological_process	0.96773	1	50	17460	273	76974	24	26
GO:0051169	nuclear transport	biological_process	0.97579	1	50	17460	277	76974	24	26
GO:0004764	shikimate 3-dehydrogenase (NADP+) activity	molecular_function	2.5534e-05	0.0014107	30	17460	64	76974	23	7
GO:0008839	4-hydroxy-tetrahydrodipicolinate reductase	molecular_function	3.0877e-05	0.001686	38	17460	92	76974	23	15
GO:0009523	photosystem II	cellular_component	0.011712	0.21912	78	17460	290	76974	23	55
GO:0008081	phosphoric diester hydrolase activity	molecular_function	0.041204	0.52768	43	17460	146	76974	23	20
GO:0042558	pteridine-containing compound metabolic process	biological_process	0.070996	0.74089	45	17460	162	76974	23	22
GO:0042559	pteridine-containing compound biosynthetic process	biological_process	0.12418	1	39	17460	144	76974	23	16
GO:0044724	single-organism carbohydrate catabolic process	biological_process	0.25906	1	59	17460	239	76974	23	36
GO:0008138	protein tyrosine/serine/threonine phosphatase activity	molecular_function	0.41239	1	31	17460	129	76974	23	8
GO:0016796	exonuclease activity, active with either ribo- or deoxyribonucleic acids and producing 5'-phosphomonoesters	molecular_function	0.44928	1	50	17460	217	76974	23	27
GO:0033178	proton-transporting two-sector ATPase complex, catalytic domain	cellular_component	0.51844	1	49	17460	218	76974	23	26
GO:0008641	small protein activating enzyme activity	molecular_function	0.55501	1	34	17460	149	76974	23	11
GO:0002376	immune system process	biological_process	0.55799	1	50	17460	223	76974	23	27
GO:0004803	transposase activity	molecular_function	0.69016	1	44	17460	202	76974	23	21
GO:0016893	endonuclease activity, active with either ribo- or deoxyribonucleic acids and producing 5'-phosphomonoesters	molecular_function	0.88106	1	40	17460	206	76974	23	17
GO:0005244	voltage-gated ion channel activity	molecular_function	0.88422	1	31	17460	161	76974	23	8
GO:0022832	voltage-gated channel activity	molecular_function	0.88422	1	31	17460	161	76974	23	8
GO:0003887	DNA-directed DNA polymerase activity	molecular_function	0.95952	1	48	17460	259	76974	23	25
GO:0072509	divalent inorganic cation transmembrane transporter activity	molecular_function	0.97245	1	41	17460	233	76974	23	18
GO:0031329	regulation of cellular catabolic process	biological_process	0.9963	1	53	17460	315	76974	23	30
GO:0005667	transcription factor complex	cellular_component	0.99791	1	38	17460	248	76974	23	15
GO:0009894	regulation of catabolic process	biological_process	0.9986	1	53	17460	326	76974	23	30
GO:0004540	ribonuclease activity	molecular_function	0.99905	1	55	17460	344	76974	23	32
GO:0043207	response to external biotic stimulus	biological_process	0.99974	1	46	17460	327	76974	23	23
GO:0051707	response to other organism	biological_process	0.99974	1	46	17460	327	76974	23	23
GO:0008654	phospholipid biosynthetic process	biological_process	0.99997	1	40	17460	300	76974	23	17
GO:0010608	posttranscriptional regulation of gene expression	biological_process	1	1	54	17460	382	76974	23	31
GO:0003855	3-dehydroquinate dehydratase activity	molecular_function	0.00014733	0.0062331	29	17460	66	76974	22	7
GO:0006547	histidine metabolic process	biological_process	0.018824	0.30588	50	17460	168	76974	22	28
GO:0052803	imidazole-containing compound metabolic process	biological_process	0.018824	0.30588	50	17460	168	76974	22	28
GO:0008378	galactosyltransferase activity	molecular_function	0.050517	0.6022	27	17460	87	76974	22	5
GO:0006338	chromatin remodeling	biological_process	0.079877	0.7732	32	17460	114	76974	22	10
GO:0006760	folic acid-containing compound metabolic process	biological_process	0.084575	0.79433	42	17460	151	76974	22	20
GO:0016160	amylase activity	molecular_function	0.090957	0.82458	30	17460	103	76974	22	8
GO:0009396	folic acid-containing compound biosynthetic process	biological_process	0.15767	1	36	17460	134	76974	22	14
GO:0098542	defense response to other organism	biological_process	0.20845	1	35	17460	138	76974	22	13
GO:0006090	pyruvate metabolic process	biological_process	0.26236	1	54	17460	218	76974	22	32
GO:0006790	sulfur compound metabolic process	biological_process	0.48323	1	40	17460	172	76974	22	18
GO:0006165	nucleoside diphosphate phosphorylation	biological_process	0.49442	1	55	17460	241	76974	22	33
GO:0009132	nucleoside diphosphate metabolic process	biological_process	0.49442	1	55	17460	241	76974	22	33
GO:0046939	nucleotide phosphorylation	biological_process	0.49442	1	55	17460	241	76974	22	33
GO:0008408	3'-5' exonuclease activity	molecular_function	0.52845	1	43	17460	189	76974	22	21
GO:0016866	intramolecular transferase activity	molecular_function	0.77275	1	42	17460	204	76974	22	20
GO:0001076	transcription factor activity, RNA polymerase II transcription factor binding	molecular_function	0.89613	1	51	17460	269	76974	22	29
GO:0001104	RNA polymerase II transcription cofactor activity	molecular_function	0.89613	1	51	17460	269	76974	22	29
GO:0016592	mediator complex	cellular_component	0.90716	1	51	17460	271	76974	22	29
GO:0098813	nuclear chromosome segregation	biological_process	0.92734	1	41	17460	218	76974	22	19
GO:0090575	RNA polymerase II transcription factor complex	cellular_component	0.99444	1	36	17460	225	76974	22	14
GO:0008757	S-adenosylmethionine-dependent methyltransferase activity	molecular_function	0.99555	1	58	17460	340	76974	22	36
GO:0044798	nuclear transcription factor complex	cellular_component	0.99803	1	36	17460	238	76974	22	14
GO:0006417	regulation of translation	biological_process	1	1	53	17460	378	76974	22	31
GO:0034248	regulation of cellular amide metabolic process	biological_process	1	1	53	17460	378	76974	22	31
GO:0010558	negative regulation of macromolecule biosynthetic process	biological_process	0.00011219	0.0049238	58	17460	161	76974	21	37
GO:0031327	negative regulation of cellular biosynthetic process	biological_process	0.00011219	0.0049238	58	17460	161	76974	21	37
GO:0051172	negative regulation of nitrogen compound metabolic process	biological_process	0.00011219	0.0049238	58	17460	161	76974	21	37
GO:2000113	negative regulation of cellular macromolecule biosynthetic process	biological_process	0.00011219	0.0049238	58	17460	161	76974	21	37
GO:0009890	negative regulation of biosynthetic process	biological_process	0.00016522	0.0068661	58	17460	163	76974	21	37
GO:0006720	isoprenoid metabolic process	biological_process	0.034824	0.48527	47	17460	161	76974	21	26
GO:0000105	histidine biosynthetic process	biological_process	0.070562	0.738	45	17460	162	76974	21	24
GO:0016679	oxidoreductase activity, acting on diphenols and related substances as donors	molecular_function	0.08653	0.80464	33	17460	119	76974	21	12
GO:0004427	inorganic diphosphatase activity	molecular_function	0.13746	1	33	17460	120	76974	21	12
GO:0006096	glycolytic process	biological_process	0.27835	1	53	17460	215	76974	21	32
GO:0006757	ATP generation from ADP	biological_process	0.27835	1	53	17460	215	76974	21	32
GO:0009135	purine nucleoside diphosphate metabolic process	biological_process	0.27835	1	53	17460	215	76974	21	32
GO:0009179	purine ribonucleoside diphosphate metabolic process	biological_process	0.27835	1	53	17460	215	76974	21	32
GO:0009185	ribonucleoside diphosphate metabolic process	biological_process	0.27835	1	53	17460	215	76974	21	32
GO:0046031	ADP metabolic process	biological_process	0.27835	1	53	17460	215	76974	21	32
GO:0006479	protein methylation	biological_process	0.39362	1	39	17460	163	76974	21	18
GO:0008213	protein alkylation	biological_process	0.39362	1	39	17460	163	76974	21	18
GO:0016646	oxidoreductase activity, acting on the CH-NH group of donors, NAD or NADP as acceptor	molecular_function	0.40466	1	35	17460	146	76974	21	14
GO:0050661	NADP binding	molecular_function	0.41337	1	38	17460	159	76974	21	17
GO:0004197	cysteine-type endopeptidase activity	molecular_function	0.50301	1	38	17460	168	76974	21	17
GO:0016763	transferase activity, transferring pentosyl groups	molecular_function	0.51056	1	32	17460	139	76974	21	11
GO:0019205	nucleobase-containing compound kinase activity	molecular_function	0.51956	1	45	17460	198	76974	21	24
GO:1901615	organic hydroxy compound metabolic process	biological_process	0.5439	1	36	17460	160	76974	21	15
GO:0006606	protein import into nucleus	biological_process	0.88484	1	43	17460	219	76974	21	22
GO:0034504	protein localization to nucleus	biological_process	0.88484	1	43	17460	219	76974	21	22
GO:0044744	protein targeting to nucleus	biological_process	0.88484	1	43	17460	219	76974	21	22
GO:0051170	nuclear import	biological_process	0.88484	1	43	17460	219	76974	21	22
GO:1902593	single-organism nuclear import	biological_process	0.88484	1	43	17460	219	76974	21	22
GO:0007596	blood coagulation	biological_process	0.94393	1	37	17460	201	76974	21	16
GO:0007599	hemostasis	biological_process	0.94393	1	37	17460	201	76974	21	16
GO:0050817	coagulation	biological_process	0.94393	1	37	17460	201	76974	21	16
GO:0050878	regulation of body fluid levels	biological_process	0.94393	1	37	17460	201	76974	21	16
GO:0001775	cell activation	biological_process	0.94746	1	41	17460	222	76974	21	20
GO:0000375	RNA splicing, via transesterification reactions	biological_process	0.95564	1	35	17460	197	76974	21	14
GO:0042060	wound healing	biological_process	0.96939	1	38	17460	214	76974	21	17
GO:0009611	response to wounding	biological_process	0.97666	1	38	17460	218	76974	21	17
GO:0042157	lipoprotein metabolic process	biological_process	0.97867	1	48	17460	275	76974	21	27
GO:0008047	enzyme activator activity	molecular_function	0.98193	1	28	17460	168	76974	21	7
GO:0005261	cation channel activity	molecular_function	0.99981	1	31	17460	234	76974	21	10
GO:0004402	histone acetyltransferase activity	molecular_function	3.8361e-05	0.0019164	24	17460	48	76974	20	4
GO:0034212	peptide N-acetyltransferase activity	molecular_function	3.8361e-05	0.0019164	24	17460	48	76974	20	4
GO:0061733	peptide-lysine-N-acetyltransferase activity	molecular_function	3.8361e-05	0.0019164	24	17460	48	76974	20	4
GO:0030258	lipid modification	biological_process	0.054334	0.61335	40	17460	138	76974	20	20
GO:0008677	2-dehydropantoate 2-reductase activity	molecular_function	0.082044	0.78469	37	17460	130	76974	20	17
GO:0042393	histone binding	molecular_function	0.15919	1	32	17460	117	76974	20	12
GO:0043631	RNA polyadenylation	biological_process	0.17059	1	24	17460	86	76974	20	4
GO:0005730	nucleolus	cellular_component	0.37602	1	28	17460	118	76974	20	8
GO:0031226	intrinsic component of plasma membrane	cellular_component	0.51897	1	41	17460	183	76974	20	21
GO:0009064	glutamine family amino acid metabolic process	biological_process	0.52353	1	46	17460	202	76974	20	26
GO:0000272	polysaccharide catabolic process	biological_process	0.60732	1	30	17460	137	76974	20	10
GO:0005991	trehalose metabolic process	biological_process	0.61113	1	42	17460	190	76974	20	22
GO:0046351	disaccharide biosynthetic process	biological_process	0.61492	1	34	17460	155	76974	20	14
GO:0003690	double-stranded DNA binding	molecular_function	0.84484	1	60	17460	291	76974	20	40
GO:0005096	GTPase activator activity	molecular_function	0.89828	1	25	17460	133	76974	20	5
GO:0015081	sodium ion transmembrane transporter activity	molecular_function	0.91451	1	32	17460	179	76974	20	12
GO:0016879	ligase activity, forming carbon-nitrogen bonds	molecular_function	0.93324	1	52	17460	269	76974	20	32
GO:0005577	fibrinogen complex	cellular_component	0.93441	1	36	17460	194	76974	20	16
GO:0030168	platelet activation	biological_process	0.93441	1	36	17460	194	76974	20	16
GO:0032040	small-subunit processome	cellular_component	0.98718	1	36	17460	214	76974	20	16
GO:0031300	intrinsic component of organelle membrane	cellular_component	0.99567	1	38	17460	245	76974	20	18
GO:0031301	integral component of organelle membrane	cellular_component	0.99567	1	38	17460	245	76974	20	18
GO:0000226	microtubule cytoskeleton organization	biological_process	0.99789	1	46	17460	285	76974	20	26
GO:0098797	plasma membrane protein complex	cellular_component	0.99976	1	34	17460	254	76974	20	14
GO:0045934	negative regulation of nucleobase-containing compound metabolic process	biological_process	0.00035711	0.0129	51	17460	143	76974	19	32
GO:0006739	NADP metabolic process	biological_process	0.0060655	0.12897	26	17460	71	76974	19	7
GO:0005199	structural constituent of cell wall	molecular_function	0.01923	0.30821	21	17460	62	76974	19	2
GO:0006066	alcohol metabolic process	biological_process	0.33561	1	32	17460	131	76974	19	13
GO:0006022	aminoglycan metabolic process	biological_process	0.36068	1	26	17460	108	76974	19	7
GO:0051259	protein oligomerization	biological_process	0.44377	1	38	17460	162	76974	19	19
GO:0023051	regulation of signaling	biological_process	0.45429	1	39	17460	167	76974	19	20
GO:0005992	trehalose biosynthetic process	biological_process	0.46175	1	33	17460	142	76974	19	14
GO:0003916	DNA topoisomerase activity	molecular_function	0.53672	1	27	17460	118	76974	19	8
GO:0006821	chloride transport	biological_process	0.59674	1	24	17460	107	76974	19	5
GO:0051726	regulation of cell cycle	biological_process	0.81288	1	39	17460	196	76974	19	20
GO:0000139	Golgi membrane	cellular_component	0.87596	1	33	17460	170	76974	19	14
GO:0033043	regulation of organelle organization	biological_process	0.87734	1	33	17460	172	76974	19	14
GO:0010506	regulation of autophagy	biological_process	0.97913	1	46	17460	258	76974	19	27
GO:0009156	ribonucleoside monophosphate biosynthetic process	biological_process	0.99579	1	52	17460	317	76974	19	33
GO:0009124	nucleoside monophosphate biosynthetic process	biological_process	0.99613	1	52	17460	318	76974	19	33
GO:0008565	protein transporter activity	molecular_function	0.99995	1	38	17460	287	76974	19	19
GO:1990204	oxidoreductase complex	cellular_component	0.0041619	0.092627	64	17460	221	76974	18	46
GO:0009664	plant-type cell wall organization	biological_process	0.016913	0.28732	20	17460	57	76974	18	2
GO:0071669	plant-type cell wall organization or biogenesis	biological_process	0.016913	0.28732	20	17460	57	76974	18	2
GO:0051321	meiotic cell cycle	biological_process	0.095597	0.85673	27	17460	93	76974	18	9
GO:0004488	methylenetetrahydrofolate dehydrogenase (NADP+) activity	molecular_function	0.16968	1	31	17460	115	76974	18	13
GO:0030414	peptidase inhibitor activity	molecular_function	0.21426	1	23	17460	90	76974	18	5
GO:0061134	peptidase regulator activity	molecular_function	0.21426	1	23	17460	90	76974	18	5
GO:0044272	sulfur compound biosynthetic process	biological_process	0.21689	1	35	17460	134	76974	18	17
GO:0016765	transferase activity, transferring alkyl or aryl (other than methyl) groups	molecular_function	0.26739	1	53	17460	213	76974	18	35
GO:0016872	intramolecular lyase activity	molecular_function	0.27836	1	25	17460	99	76974	18	7
GO:0044033	multi-organism metabolic process	biological_process	0.47019	1	29	17460	123	76974	18	11
GO:0010646	regulation of cell communication	biological_process	0.49346	1	38	17460	165	76974	18	20
GO:0070566	adenylyltransferase activity	molecular_function	0.51025	1	24	17460	103	76974	18	6
GO:0050790	regulation of catalytic activity	biological_process	0.67371	1	41	17460	193	76974	18	23
GO:0005887	integral component of plasma membrane	cellular_component	0.72529	1	36	17460	174	76974	18	18
GO:0033179	proton-transporting V-type ATPase, V0 domain	cellular_component	0.77544	1	45	17460	216	76974	18	27
GO:0022900	electron transport chain	biological_process	0.81621	1	36	17460	183	76974	18	18
GO:0009110	vitamin biosynthetic process	biological_process	0.92734	1	40	17460	214	76974	18	22
GO:0042364	water-soluble vitamin biosynthetic process	biological_process	0.92734	1	40	17460	214	76974	18	22
GO:0006766	vitamin metabolic process	biological_process	0.94084	1	40	17460	217	76974	18	22
GO:0006767	water-soluble vitamin metabolic process	biological_process	0.94084	1	40	17460	217	76974	18	22
GO:0046486	glycerolipid metabolic process	biological_process	0.9937	1	48	17460	289	76974	18	30
GO:0009142	nucleoside triphosphate biosynthetic process	biological_process	0.99889	1	46	17460	301	76974	18	28
GO:0009145	purine nucleoside triphosphate biosynthetic process	biological_process	0.99889	1	46	17460	301	76974	18	28
GO:0009201	ribonucleoside triphosphate biosynthetic process	biological_process	0.99889	1	46	17460	301	76974	18	28
GO:0009206	purine ribonucleoside triphosphate biosynthetic process	biological_process	0.99889	1	46	17460	301	76974	18	28
GO:0003743	translation initiation factor activity	molecular_function	0.99926	1	30	17460	215	76974	18	12
GO:0005815	microtubule organizing center	cellular_component	0.99977	1	28	17460	207	76974	18	10
GO:0045182	translation regulator activity	molecular_function	1	1	43	17460	324	76974	18	25
GO:0045892	negative regulation of transcription, DNA-templated	biological_process	0.0012684	0.03707	47	17460	136	76974	17	30
GO:0051253	negative regulation of RNA metabolic process	biological_process	0.0012684	0.03707	47	17460	136	76974	17	30
GO:1902679	negative regulation of RNA biosynthetic process	biological_process	0.0012684	0.03707	47	17460	136	76974	17	30
GO:1903507	negative regulation of nucleic acid-templated transcription	biological_process	0.0012684	0.03707	47	17460	136	76974	17	30
GO:0031072	heat shock protein binding	molecular_function	0.0053246	0.11684	34	17460	100	76974	17	17
GO:0051087	chaperone binding	molecular_function	0.014981	0.26056	32	17460	99	76974	17	15
GO:0008374	O-acyltransferase activity	molecular_function	0.054224	0.61335	40	17460	139	76974	17	23
GO:0008299	isoprenoid biosynthetic process	biological_process	0.075676	0.76394	42	17460	149	76974	17	25
GO:0004529	exodeoxyribonuclease activity	molecular_function	0.15909	1	32	17460	120	76974	17	15
GO:0016895	exodeoxyribonuclease activity, producing 5'-phosphomonoesters	molecular_function	0.15909	1	32	17460	120	76974	17	15
GO:0008855	exodeoxyribonuclease VII activity	molecular_function	0.20624	1	30	17460	115	76974	17	13
GO:0019201	nucleotide kinase activity	molecular_function	0.29767	1	39	17460	156	76974	17	22
GO:0052646	alditol phosphate metabolic process	biological_process	0.31033	1	33	17460	132	76974	17	16
GO:0061025	membrane fusion	biological_process	0.52887	1	32	17460	141	76974	17	15
GO:0009966	regulation of signal transduction	biological_process	0.53331	1	37	17460	163	76974	17	20
GO:0005247	voltage-gated chloride channel activity	molecular_function	0.62252	1	22	17460	99	76974	17	5
GO:0005253	anion channel activity	molecular_function	0.62252	1	22	17460	99	76974	17	5
GO:0005254	chloride channel activity	molecular_function	0.62252	1	22	17460	99	76974	17	5
GO:0008308	voltage-gated anion channel activity	molecular_function	0.62252	1	22	17460	99	76974	17	5
GO:0015108	chloride transmembrane transporter activity	molecular_function	0.62252	1	22	17460	99	76974	17	5
GO:0016651	oxidoreductase activity, acting on NAD(P)H	molecular_function	0.64149	1	31	17460	147	76974	17	14
GO:0015937	coenzyme A biosynthetic process	biological_process	0.91808	1	22	17460	122	76974	17	5
GO:0033866	nucleoside bisphosphate biosynthetic process	biological_process	0.91808	1	22	17460	122	76974	17	5
GO:0034030	ribonucleoside bisphosphate biosynthetic process	biological_process	0.91808	1	22	17460	122	76974	17	5
GO:0034033	purine nucleoside bisphosphate biosynthetic process	biological_process	0.91808	1	22	17460	122	76974	17	5
GO:0005882	intermediate filament	cellular_component	0.93818	1	30	17460	164	76974	17	13
GO:0045111	intermediate filament cytoskeleton	cellular_component	0.93818	1	30	17460	164	76974	17	13
GO:0072511	divalent inorganic cation transport	biological_process	0.95794	1	31	17460	176	76974	17	14
GO:0015936	coenzyme A metabolic process	biological_process	0.96424	1	22	17460	131	76974	17	5
GO:0006754	ATP biosynthetic process	biological_process	0.9959	1	44	17460	275	76974	17	27
GO:0008375	acetylglucosaminyltransferase activity	molecular_function	0.99623	1	22	17460	151	76974	17	5
GO:0009127	purine nucleoside monophosphate biosynthetic process	biological_process	0.99696	1	50	17460	310	76974	17	33
GO:0009168	purine ribonucleoside monophosphate biosynthetic process	biological_process	0.99696	1	50	17460	310	76974	17	33
GO:0005819	spindle	cellular_component	0.99887	1	36	17460	238	76974	17	19
GO:0006650	glycerophospholipid metabolic process	biological_process	0.99985	1	37	17460	268	76974	17	20
GO:0006072	glycerol-3-phosphate metabolic process	biological_process	0.066231	0.71664	30	17460	101	76974	16	14
GO:0046168	glycerol-3-phosphate catabolic process	biological_process	0.066231	0.71664	30	17460	101	76974	16	14
GO:0016161	beta-amylase activity	molecular_function	0.1582	1	23	17460	81	76974	16	7
GO:0000502	proteasome complex	cellular_component	0.21777	1	40	17460	162	76974	16	24
GO:0016641	oxidoreductase activity, acting on the CH-NH2 group of donors, oxygen as acceptor	molecular_function	0.22604	1	25	17460	95	76974	16	9
GO:0019080	viral gene expression	biological_process	0.48512	1	27	17460	115	76974	16	11
GO:0046434	organophosphate catabolic process	biological_process	0.5043	1	30	17460	130	76974	16	14
GO:0005773	vacuole	cellular_component	0.52692	1	36	17460	160	76974	16	20
GO:0022411	cellular component disassembly	biological_process	0.52745	1	32	17460	142	76974	16	16
GO:0032984	macromolecular complex disassembly	biological_process	0.52745	1	32	17460	142	76974	16	16
GO:0033180	proton-transporting V-type ATPase, V1 domain	cellular_component	0.57697	1	38	17460	172	76974	16	22
GO:0018205	peptidyl-lysine modification	biological_process	0.64816	1	25	17460	114	76974	16	9
GO:0010256	endomembrane system organization	biological_process	0.71192	1	38	17460	180	76974	16	22
GO:0055065	metal ion homeostasis	biological_process	0.82633	1	33	17460	172	76974	16	17
GO:0050801	ion homeostasis	biological_process	0.83448	1	33	17460	173	76974	16	17
GO:0055080	cation homeostasis	biological_process	0.83448	1	33	17460	173	76974	16	17
GO:0098771	inorganic ion homeostasis	biological_process	0.83448	1	33	17460	173	76974	16	17
GO:0044282	small molecule catabolic process	biological_process	0.85966	1	32	17460	163	76974	16	16
GO:0048878	chemical homeostasis	biological_process	0.87953	1	33	17460	178	76974	16	17
GO:0006006	glucose metabolic process	biological_process	0.96199	1	29	17460	165	76974	16	13
GO:0019899	enzyme binding	molecular_function	0.9735	1	49	17460	268	76974	16	33
GO:0004521	endoribonuclease activity	molecular_function	0.97422	1	35	17460	203	76974	16	19
GO:0015985	energy coupled proton transport, down electrochemical gradient	biological_process	0.99237	1	43	17460	263	76974	16	27
GO:0015986	ATP synthesis coupled proton transport	biological_process	0.99237	1	43	17460	263	76974	16	27
GO:0000278	mitotic cell cycle	biological_process	0.99285	1	25	17460	164	76974	16	9
GO:1903047	mitotic cell cycle process	biological_process	0.99285	1	25	17460	164	76974	16	9
GO:0046488	phosphatidylinositol metabolic process	biological_process	0.99851	1	35	17460	237	76974	16	19
GO:0007127	meiosis I	biological_process	0.022025	0.34135	22	17460	64	76974	15	7
GO:0007126	meiotic nuclear division	biological_process	0.0507	0.6022	22	17460	69	76974	15	7
GO:1903046	meiotic cell cycle process	biological_process	0.0507	0.6022	22	17460	69	76974	15	7
GO:0016624	oxidoreductase activity, acting on the aldehyde or oxo group of donors, disulfide as acceptor	molecular_function	0.068165	0.72422	23	17460	74	76974	15	8
GO:0000746	conjugation	biological_process	0.10418	0.90601	30	17460	106	76974	15	15
GO:0010035	response to inorganic substance	biological_process	0.14512	1	16	17460	56	76974	15	1
GO:0000794	condensed nuclear chromosome	cellular_component	0.31551	1	39	17460	159	76974	15	24
GO:0004866	endopeptidase inhibitor activity	molecular_function	0.33088	1	19	17460	79	76974	15	4
GO:0061135	endopeptidase regulator activity	molecular_function	0.33088	1	19	17460	79	76974	15	4
GO:0005230	extracellular ligand-gated ion channel activity	molecular_function	0.39067	1	28	17460	115	76974	15	13
GO:0019083	viral transcription	biological_process	0.39519	1	21	17460	85	76974	15	6
GO:0043241	protein complex disassembly	biological_process	0.4867	1	30	17460	131	76974	15	15
GO:0000221	vacuolar proton-transporting V-type ATPase, V1 domain	cellular_component	0.55951	1	34	17460	153	76974	15	19
GO:0016471	vacuolar proton-transporting V-type ATPase complex	cellular_component	0.55951	1	34	17460	153	76974	15	19
GO:0005774	vacuolar membrane	cellular_component	0.57685	1	34	17460	154	76974	15	19
GO:0044437	vacuolar part	cellular_component	0.57685	1	34	17460	154	76974	15	19
GO:0004559	alpha-mannosidase activity	molecular_function	0.70855	1	22	17460	103	76974	15	7
GO:0009073	aromatic amino acid family biosynthetic process	biological_process	0.84373	1	21	17460	109	76974	15	6
GO:0006873	cellular ion homeostasis	biological_process	0.88619	1	30	17460	164	76974	15	15
GO:0006875	cellular metal ion homeostasis	biological_process	0.88619	1	30	17460	164	76974	15	15
GO:0030003	cellular cation homeostasis	biological_process	0.88619	1	30	17460	164	76974	15	15
GO:0055082	cellular chemical homeostasis	biological_process	0.88619	1	30	17460	164	76974	15	15
GO:0016891	endoribonuclease activity, producing 5'-phosphomonoesters	molecular_function	0.89985	1	28	17460	150	76974	15	13
GO:0070838	divalent metal ion transport	biological_process	0.9165	1	29	17460	157	76974	15	14
GO:0015923	mannosidase activity	molecular_function	0.92352	1	24	17460	131	76974	15	9
GO:0030154	cell differentiation	biological_process	0.92956	1	25	17460	144	76974	15	10
GO:0018995	host	cellular_component	0.94025	1	26	17460	150	76974	15	11
GO:0033643	host cell part	cellular_component	0.94025	1	26	17460	150	76974	15	11
GO:0043657	host cell	cellular_component	0.94025	1	26	17460	150	76974	15	11
GO:0044215	other organism	cellular_component	0.94025	1	26	17460	150	76974	15	11
GO:0044216	other organism cell	cellular_component	0.94025	1	26	17460	150	76974	15	11
GO:0044217	other organism part	cellular_component	0.94025	1	26	17460	150	76974	15	11
GO:0048278	vesicle docking	biological_process	0.95413	1	21	17460	122	76974	15	6
GO:0003968	RNA-directed RNA polymerase activity	molecular_function	0.96346	1	23	17460	136	76974	15	8
GO:0000377	RNA splicing, via transesterification reactions with bulged adenosine as nucleophile	biological_process	0.99202	1	24	17460	160	76974	15	9
GO:0000398	mRNA splicing, via spliceosome	biological_process	0.99202	1	24	17460	160	76974	15	9
GO:0022406	membrane docking	biological_process	0.99326	1	21	17460	142	76974	15	6
GO:0004143	diacylglycerol kinase activity	molecular_function	0.0001926	0.0076647	17	17460	32	76974	14	3
GO:0006083	acetate metabolic process	biological_process	0.020291	0.31975	19	17460	52	76974	14	5
GO:1901700	response to oxygen-containing compound	biological_process	0.070232	0.73795	16	17460	51	76974	14	2
GO:0003777	microtubule motor activity	molecular_function	0.11481	0.96973	48	17460	176	76974	14	34
GO:0072525	pyridine-containing compound biosynthetic process	biological_process	0.12069	0.99084	16	17460	52	76974	14	2
GO:0007018	microtubule-based movement	biological_process	0.12157	0.99284	48	17460	177	76974	14	34
GO:0006570	tyrosine metabolic process	biological_process	0.14625	1	14	17460	46	76974	14	0
GO:0006721	terpenoid metabolic process	biological_process	0.16845	1	28	17460	102	76974	14	14
GO:0016114	terpenoid biosynthetic process	biological_process	0.16845	1	28	17460	102	76974	14	14
GO:0042180	cellular ketone metabolic process	biological_process	0.17285	1	18	17460	64	76974	14	4
GO:0044087	regulation of cellular component biogenesis	biological_process	0.20899	1	23	17460	86	76974	14	9
GO:0016615	malate dehydrogenase activity	molecular_function	0.25251	1	18	17460	66	76974	14	4
GO:0043248	proteasome assembly	biological_process	0.28589	1	22	17460	85	76974	14	8
GO:0019751	polyol metabolic process	biological_process	0.36424	1	26	17460	105	76974	14	12
GO:0008443	phosphofructokinase activity	molecular_function	0.41426	1	30	17460	126	76974	14	16
GO:0006040	amino sugar metabolic process	biological_process	0.44453	1	20	17460	86	76974	14	6
GO:0019200	carbohydrate kinase activity	molecular_function	0.46934	1	30	17460	129	76974	14	16
GO:0000990	transcription factor activity, core RNA polymerase binding	molecular_function	0.6831	1	24	17460	113	76974	14	10
GO:0000996	core DNA-dependent RNA polymerase binding promoter specificity activity	molecular_function	0.6831	1	24	17460	113	76974	14	10
GO:0016987	sigma factor activity	molecular_function	0.6831	1	24	17460	113	76974	14	10
GO:0006265	DNA topological change	biological_process	0.7001	1	20	17460	95	76974	14	6
GO:0098799	outer mitochondrial membrane protein complex	cellular_component	0.74828	1	20	17460	99	76974	14	6
GO:0030030	cell projection organization	biological_process	0.75591	1	21	17460	107	76974	14	7
GO:0019783	ubiquitin-like protein-specific protease activity	molecular_function	0.82086	1	19	17460	98	76974	14	5
GO:0048731	system development	biological_process	0.8414	1	16	17460	88	76974	14	2
GO:0006904	vesicle docking involved in exocytosis	biological_process	0.90368	1	20	17460	109	76974	14	6
GO:0005672	transcription factor TFIIA complex	cellular_component	0.93538	1	26	17460	145	76974	14	12
GO:0010604	positive regulation of macromolecule metabolic process	biological_process	0.95949	1	23	17460	137	76974	14	9
GO:0007067	mitotic nuclear division	biological_process	0.98648	1	22	17460	142	76974	14	8
GO:0009896	positive regulation of catabolic process	biological_process	0.99987	1	27	17460	207	76974	14	13
GO:0010508	positive regulation of autophagy	biological_process	0.99987	1	27	17460	207	76974	14	13
GO:0031331	positive regulation of cellular catabolic process	biological_process	0.99987	1	27	17460	207	76974	14	13
GO:0016762	xyloglucan:xyloglucosyl transferase activity	molecular_function	3.5266e-05	0.0018401	26	17460	56	76974	13	13
GO:0048046	apoplast	cellular_component	3.5266e-05	0.0018401	26	17460	56	76974	13	13
GO:0007205	protein kinase C-activating G-protein coupled receptor signaling pathway	biological_process	0.00044147	0.015023	15	17460	28	76974	13	2
GO:0019385	methanogenesis, from acetate	biological_process	0.0011438	0.035347	14	17460	27	76974	13	1
GO:0030259	lipid glycosylation	biological_process	0.0038162	0.085746	29	17460	79	76974	13	16
GO:0016272	prefoldin complex	cellular_component	0.0076363	0.15867	26	17460	74	76974	13	13
GO:0019359	nicotinamide nucleotide biosynthetic process	biological_process	0.010753	0.21056	14	17460	33	76974	13	1
GO:0019363	pyridine nucleotide biosynthetic process	biological_process	0.014428	0.25615	14	17460	34	76974	13	1
GO:0009991	response to extracellular stimulus	biological_process	0.067941	0.72348	17	17460	55	76974	13	4
GO:0031668	cellular response to extracellular stimulus	biological_process	0.067941	0.72348	17	17460	55	76974	13	4
GO:0071496	cellular response to external stimulus	biological_process	0.067941	0.72348	17	17460	55	76974	13	4
GO:0000413	protein peptidyl-prolyl isomerization	biological_process	0.089784	0.82188	35	17460	130	76974	13	22
GO:0003755	peptidyl-prolyl cis-trans isomerase activity	molecular_function	0.089784	0.82188	35	17460	130	76974	13	22
GO:0016859	cis-trans isomerase activity	molecular_function	0.089784	0.82188	35	17460	130	76974	13	22
GO:0018208	peptidyl-proline modification	biological_process	0.089784	0.82188	35	17460	130	76974	13	22
GO:0009615	response to virus	biological_process	0.090636	0.82326	27	17460	93	76974	13	14
GO:0016682	oxidoreductase activity, acting on diphenols and related substances as donors, oxygen as acceptor	molecular_function	0.093217	0.8377	15	17460	48	76974	13	2
GO:0003993	acid phosphatase activity	molecular_function	0.1781	1	29	17460	106	76974	13	16
GO:0004652	polynucleotide adenylyltransferase activity	molecular_function	0.19317	1	17	17460	59	76974	13	4
GO:0004470	malic enzyme activity	molecular_function	0.22975	1	17	17460	61	76974	13	4
GO:0004471	malate dehydrogenase (decarboxylating) (NAD+) activity	molecular_function	0.22975	1	17	17460	61	76974	13	4
GO:0044801	single-organism membrane fusion	biological_process	0.26266	1	23	17460	89	76974	13	10
GO:0000921	septin ring assembly	biological_process	0.26699	1	19	17460	72	76974	13	6
GO:0005940	septin ring	cellular_component	0.26699	1	19	17460	72	76974	13	6
GO:0031106	septin ring organization	biological_process	0.26699	1	19	17460	72	76974	13	6
GO:0032156	septin cytoskeleton	cellular_component	0.26699	1	19	17460	72	76974	13	6
GO:0032185	septin cytoskeleton organization	biological_process	0.26699	1	19	17460	72	76974	13	6
GO:0048284	organelle fusion	biological_process	0.28533	1	22	17460	86	76974	13	9
GO:0008272	sulfate transport	biological_process	0.31566	1	21	17460	82	76974	13	8
GO:0015116	sulfate transmembrane transporter activity	molecular_function	0.31566	1	21	17460	82	76974	13	8
GO:1901682	sulfur compound transmembrane transporter activity	molecular_function	0.31566	1	21	17460	82	76974	13	8
GO:1902495	transmembrane transporter complex	cellular_component	0.33123	1	19	17460	78	76974	13	6
GO:1990351	transporter complex	cellular_component	0.33123	1	19	17460	78	76974	13	6
GO:0072348	sulfur compound transport	biological_process	0.33379	1	21	17460	83	76974	13	8
GO:0016709	oxidoreductase activity, acting on paired donors, with incorporation or reduction of molecular oxygen, NAD(P)H as one donor, and incorporation of one atom of oxygen	molecular_function	0.33851	1	32	17460	129	76974	13	19
GO:0007006	mitochondrial membrane organization	biological_process	0.34613	1	20	17460	79	76974	13	7
GO:0051493	regulation of cytoskeleton organization	biological_process	0.36092	1	22	17460	90	76974	13	9
GO:0042597	periplasmic space	cellular_component	0.36971	1	22	17460	92	76974	13	9
GO:0000123	histone acetyltransferase complex	cellular_component	0.38624	1	16	17460	64	76974	13	3
GO:0031248	protein acetyltransferase complex	cellular_component	0.38624	1	16	17460	64	76974	13	3
GO:1902493	acetyltransferase complex	cellular_component	0.38624	1	16	17460	64	76974	13	3
GO:0019013	viral nucleocapsid	cellular_component	0.42368	1	22	17460	92	76974	13	9
GO:0004970	ionotropic glutamate receptor activity	molecular_function	0.4428	1	26	17460	109	76974	13	13
GO:0008066	glutamate receptor activity	molecular_function	0.4428	1	26	17460	109	76974	13	13
GO:0007034	vacuolar transport	biological_process	0.45595	1	17	17460	73	76974	13	4
GO:0030029	actin filament-based process	biological_process	0.50571	1	25	17460	109	76974	13	12
GO:0030036	actin cytoskeleton organization	biological_process	0.50571	1	25	17460	109	76974	13	12
GO:0019748	secondary metabolic process	biological_process	0.5889	1	19	17460	85	76974	13	6
GO:0006955	immune response	biological_process	0.60296	1	31	17460	141	76974	13	18
GO:0048468	cell development	biological_process	0.61396	1	17	17460	81	76974	13	4
GO:0006839	mitochondrial transport	biological_process	0.67355	1	19	17460	91	76974	13	6
GO:0015035	protein disulfide oxidoreductase activity	molecular_function	0.67716	1	27	17460	134	76974	13	14
GO:0015036	disulfide oxidoreductase activity	molecular_function	0.67716	1	27	17460	134	76974	13	14
GO:0010181	FMN binding	molecular_function	0.68782	1	21	17460	101	76974	13	8
GO:0016860	intramolecular oxidoreductase activity	molecular_function	0.68973	1	21	17460	102	76974	13	8
GO:0000785	chromatin	cellular_component	0.72398	1	24	17460	118	76974	13	11
GO:0051302	regulation of cell division	biological_process	0.72668	1	21	17460	102	76974	13	8
GO:0005742	mitochondrial outer membrane translocase complex	cellular_component	0.77525	1	17	17460	86	76974	13	4
GO:0006323	DNA packaging	biological_process	0.8092	1	31	17460	155	76974	13	18
GO:0032879	regulation of localization	biological_process	0.87052	1	20	17460	110	76974	13	7
GO:0045259	proton-transporting ATP synthase complex	cellular_component	0.89684	1	32	17460	175	76974	13	19
GO:0016054	organic acid catabolic process	biological_process	0.93925	1	26	17460	145	76974	13	13
GO:0046395	carboxylic acid catabolic process	biological_process	0.93925	1	26	17460	145	76974	13	13
GO:0032324	molybdopterin cofactor biosynthetic process	biological_process	0.94693	1	19	17460	111	76974	13	6
GO:0043545	molybdopterin cofactor metabolic process	biological_process	0.94693	1	19	17460	111	76974	13	6
GO:0051189	prosthetic group metabolic process	biological_process	0.94693	1	19	17460	111	76974	13	6
GO:0008173	RNA methyltransferase activity	molecular_function	0.98941	1	32	17460	197	76974	13	19
GO:0016459	myosin complex	cellular_component	0.99987	1	18	17460	153	76974	13	5
GO:0051701	interaction with host	biological_process	1	1	26	17460	340	76974	13	13
GO:0009415	response to water	biological_process	0.00030736	0.011276	12	17460	21	76974	12	0
GO:0009584	detection of visible light	biological_process	0.0013682	0.039662	19	17460	42	76974	12	7
GO:0018298	protein-chromophore linkage	biological_process	0.0019242	0.051932	19	17460	43	76974	12	7
GO:0009581	detection of external stimulus	biological_process	0.0026591	0.0647	19	17460	44	76974	12	7
GO:0009582	detection of abiotic stimulus	biological_process	0.0026591	0.0647	19	17460	44	76974	12	7
GO:0009583	detection of light stimulus	biological_process	0.0026591	0.0647	19	17460	44	76974	12	7
GO:0051606	detection of stimulus	biological_process	0.0036147	0.083092	19	17460	45	76974	12	7
GO:0042651	thylakoid membrane	cellular_component	0.0077712	0.16076	53	17460	182	76974	12	41
GO:0001101	response to acid chemical	biological_process	0.010945	0.21151	13	17460	32	76974	12	1
GO:0016703	oxidoreductase activity, acting on single donors with incorporation of molecular oxygen, incorporation of one atom of oxygen (internal monooxygenases or internal mixed function oxidases)	molecular_function	0.079202	0.7732	26	17460	88	76974	12	14
GO:0009416	response to light stimulus	biological_process	0.15895	1	20	17460	69	76974	12	8
GO:0005839	proteasome core complex	cellular_component	0.16886	1	33	17460	129	76974	12	21
GO:0009314	response to radiation	biological_process	0.19458	1	20	17460	71	76974	12	8
GO:0051336	regulation of hydrolase activity	biological_process	0.19777	1	21	17460	78	76974	12	9
GO:0008061	chitin binding	molecular_function	0.21499	1	13	17460	47	76974	12	1
GO:0043900	regulation of multi-organism process	biological_process	0.21984	1	25	17460	95	76974	12	13
GO:0004127	cytidylate kinase activity	molecular_function	0.33895	1	30	17460	120	76974	12	18
GO:0006935	chemotaxis	biological_process	0.37035	1	14	17460	58	76974	12	2
GO:0042330	taxis	biological_process	0.37035	1	14	17460	58	76974	12	2
GO:0006081	cellular aldehyde metabolic process	biological_process	0.37748	1	19	17460	77	76974	12	7
GO:0043624	cellular protein complex disassembly	biological_process	0.38433	1	27	17460	113	76974	12	15
GO:0001539	cilium or flagellum-dependent cell motility	biological_process	0.38567	1	17	17460	69	76974	12	5
GO:0097588	archaeal or bacterial-type flagellum-dependent cell motility	biological_process	0.38567	1	17	17460	69	76974	12	5
GO:0009084	glutamine family amino acid biosynthetic process	biological_process	0.38974	1	29	17460	120	76974	12	17
GO:0051607	defense response to virus	biological_process	0.4007	1	16	17460	65	76974	12	4
GO:0009095	aromatic amino acid family biosynthetic process, prephenate pathway	biological_process	0.40574	1	13	17460	52	76974	12	1
GO:0002252	immune effector process	biological_process	0.4278	1	16	17460	66	76974	12	4
GO:0060590	ATPase regulator activity	molecular_function	0.43023	1	30	17460	132	76974	12	18
GO:0072527	pyrimidine-containing compound metabolic process	biological_process	0.48486	1	27	17460	118	76974	12	15
GO:0009678	hydrogen-translocating pyrophosphatase activity	molecular_function	0.60729	1	22	17460	98	76974	12	10
GO:0032182	ubiquitin-like protein binding	molecular_function	0.64036	1	18	17460	84	76974	12	6
GO:0016042	lipid catabolic process	biological_process	0.66456	1	22	17460	102	76974	12	10
GO:0048038	quinone binding	molecular_function	0.69384	1	22	17460	103	76974	12	10
GO:0035091	phosphatidylinositol binding	molecular_function	0.83487	1	18	17460	93	76974	12	6
GO:0022884	macromolecule transmembrane transporter activity	molecular_function	0.86671	1	19	17460	111	76974	12	7
GO:0033218	amide binding	molecular_function	0.87323	1	15	17460	85	76974	12	3
GO:0030176	integral component of endoplasmic reticulum membrane	cellular_component	0.96224	1	21	17460	131	76974	12	9
GO:0031227	intrinsic component of endoplasmic reticulum membrane	cellular_component	0.96224	1	21	17460	131	76974	12	9
GO:0005262	calcium channel activity	molecular_function	0.99614	1	18	17460	133	76974	12	6
GO:0015085	calcium ion transmembrane transporter activity	molecular_function	0.99703	1	18	17460	135	76974	12	6
GO:0006643	membrane lipid metabolic process	biological_process	0.99901	1	28	17460	204	76974	12	16
GO:0008170	N-methyltransferase activity	molecular_function	0.99993	1	28	17460	229	76974	12	16
GO:0004930	G-protein coupled receptor activity	molecular_function	0.99998	1	21	17460	201	76974	12	9
GO:0016838	carbon-oxygen lyase activity, acting on phosphates	molecular_function	1.2389e-05	0.00070949	82	17460	232	76974	11	71
GO:0016717	oxidoreductase activity, acting on paired donors, with oxidation of a pair of donors resulting in the reduction of molecular oxygen to two molecules of water	molecular_function	0.00010275	0.0046848	22	17460	45	76974	11	11
GO:0015696	ammonium transport	biological_process	0.0095517	0.19087	17	17460	43	76974	11	6
GO:0003951	NAD+ kinase activity	molecular_function	0.011514	0.21735	12	17460	27	76974	11	1
GO:0006741	NADP biosynthetic process	biological_process	0.011514	0.21735	12	17460	27	76974	11	1
GO:0008519	ammonium transmembrane transporter activity	molecular_function	0.019962	0.31563	17	17460	46	76974	11	6
GO:0016298	lipase activity	molecular_function	0.050775	0.6022	21	17460	65	76974	11	10
GO:0030955	potassium ion binding	molecular_function	0.079408	0.7732	27	17460	90	76974	11	16
GO:0031420	alkali metal ion binding	molecular_function	0.079408	0.7732	27	17460	90	76974	11	16
GO:0019843	rRNA binding	molecular_function	0.08334	0.78904	19	17460	65	76974	11	8
GO:0008483	transaminase activity	molecular_function	0.10891	0.93331	19	17460	63	76974	11	8
GO:0016769	transferase activity, transferring nitrogenous groups	molecular_function	0.10891	0.93331	19	17460	63	76974	11	8
GO:0008312	7S RNA binding	molecular_function	0.13288	1	16	17460	55	76974	11	5
GO:0048500	signal recognition particle	cellular_component	0.13288	1	16	17460	55	76974	11	5
GO:0015105	arsenite transmembrane transporter activity	molecular_function	0.13558	1	13	17460	41	76974	11	2
GO:0015700	arsenite transport	biological_process	0.13558	1	13	17460	41	76974	11	2
GO:0006536	glutamate metabolic process	biological_process	0.16286	1	23	17460	83	76974	11	12
GO:0046912	transferase activity, transferring acyl groups, acyl groups converted into alkyl on transfer	molecular_function	0.20176	1	18	17460	65	76974	11	7
GO:0051119	sugar transmembrane transporter activity	molecular_function	0.20294	1	17	17460	61	76974	11	6
GO:1901505	carbohydrate derivative transporter activity	molecular_function	0.21611	1	21	17460	79	76974	11	10
GO:0005231	excitatory extracellular ligand-gated ion channel activity	molecular_function	0.21732	1	21	17460	76	76974	11	10
GO:0008131	primary amine oxidase activity	molecular_function	0.22685	1	19	17460	69	76974	11	8
GO:0045735	nutrient reservoir activity	molecular_function	0.2509	1	22	17460	90	76974	11	11
GO:0015294	solute:cation symporter activity	molecular_function	0.40672	1	21	17460	87	76974	11	10
GO:0071973	bacterial-type flagellum-dependent cell motility	biological_process	0.41718	1	16	17460	66	76974	11	5
GO:1990542	mitochondrial transmembrane transport	biological_process	0.4231	1	16	17460	66	76974	11	5
GO:0022904	respiratory electron transport chain	biological_process	0.48921	1	20	17460	89	76974	11	9
GO:0031175	neuron projection development	biological_process	0.51718	1	11	17460	50	76974	11	0
GO:0048666	neuron development	biological_process	0.51718	1	11	17460	50	76974	11	0
GO:0015293	symporter activity	molecular_function	0.54437	1	21	17460	93	76974	11	10
GO:0006626	protein targeting to mitochondrion	biological_process	0.55269	1	17	17460	76	76974	11	6
GO:0006298	mismatch repair	biological_process	0.59785	1	24	17460	107	76974	11	13
GO:0070585	protein localization to mitochondrion	biological_process	0.59985	1	17	17460	78	76974	11	6
GO:0072655	establishment of protein localization to mitochondrion	biological_process	0.59985	1	17	17460	78	76974	11	6
GO:0004571	mannosyl-oligosaccharide 1,2-alpha-mannosidase activity	molecular_function	0.62048	1	14	17460	63	76974	11	3
GO:0015924	mannosyl-oligosaccharide mannosidase activity	molecular_function	0.62048	1	14	17460	63	76974	11	3
GO:0000790	nuclear chromatin	cellular_component	0.64955	1	16	17460	76	76974	11	5
GO:0030182	neuron differentiation	biological_process	0.66246	1	11	17460	55	76974	11	0
GO:0048699	generation of neurons	biological_process	0.66246	1	11	17460	55	76974	11	0
GO:0005048	signal sequence binding	molecular_function	0.67597	1	13	17460	64	76974	11	2
GO:0042277	peptide binding	molecular_function	0.67597	1	13	17460	64	76974	11	2
GO:0017119	Golgi transport complex	cellular_component	0.68557	1	22	17460	103	76974	11	11
GO:0022008	neurogenesis	biological_process	0.68901	1	11	17460	56	76974	11	0
GO:0007399	nervous system development	biological_process	0.71406	1	11	17460	57	76974	11	0
GO:0043021	ribonucleoprotein complex binding	molecular_function	0.72354	1	16	17460	80	76974	11	5
GO:0008026	ATP-dependent helicase activity	molecular_function	0.74455	1	27	17460	130	76974	11	16
GO:0070035	purine NTP-dependent helicase activity	molecular_function	0.74455	1	27	17460	130	76974	11	16
GO:0016854	racemase and epimerase activity	molecular_function	0.75505	1	19	17460	94	76974	11	8
GO:0035821	modification of morphology or physiology of other organism	biological_process	0.87356	1	18	17460	99	76974	11	7
GO:0071806	protein transmembrane transport	biological_process	0.88461	1	16	17460	91	76974	11	5
GO:1901617	organic hydroxy compound biosynthetic process	biological_process	0.8912	1	14	17460	79	76974	11	3
GO:0005753	mitochondrial proton-transporting ATP synthase complex	cellular_component	0.89399	1	20	17460	114	76974	11	9
GO:0000940	condensed chromosome outer kinetochore	cellular_component	0.90732	1	28	17460	151	76974	11	17
GO:0007166	cell surface receptor signaling pathway	biological_process	0.9133	1	19	17460	111	76974	11	8
GO:0005681	spliceosomal complex	cellular_component	0.93943	1	20	17460	118	76974	11	9
GO:0000777	condensed chromosome kinetochore	cellular_component	0.95117	1	28	17460	159	76974	11	17
GO:0000779	condensed chromosome, centromeric region	cellular_component	0.95117	1	28	17460	159	76974	11	17
GO:0004611	phosphoenolpyruvate carboxykinase activity	molecular_function	0.95641	1	22	17460	128	76974	11	11
GO:0016868	intramolecular transferase activity, phosphotransferases	molecular_function	0.97174	1	18	17460	114	76974	11	7
GO:0046915	transition metal ion transmembrane transporter activity	molecular_function	0.97304	1	16	17460	107	76974	11	5
GO:0010628	positive regulation of gene expression	biological_process	0.97738	1	18	17460	117	76974	11	7
GO:0006413	translational initiation	biological_process	0.98613	1	22	17460	144	76974	11	11
GO:0000041	transition metal ion transport	biological_process	0.98786	1	16	17460	115	76974	11	5
GO:0006403	RNA localization	biological_process	0.99546	1	28	17460	191	76974	11	17
GO:0050657	nucleic acid transport	biological_process	0.99546	1	28	17460	191	76974	11	17
GO:0050658	RNA transport	biological_process	0.99546	1	28	17460	191	76974	11	17
GO:0051236	establishment of RNA localization	biological_process	0.99546	1	28	17460	191	76974	11	17
GO:0015931	nucleobase-containing compound transport	biological_process	0.99662	1	29	17460	199	76974	11	18
GO:0034655	nucleobase-containing compound catabolic process	biological_process	0.99871	1	27	17460	190	76974	11	16
GO:0009654	photosystem II oxygen evolving complex	cellular_component	0.0023279	0.059737	48	17460	154	76974	10	38
GO:0019773	proteasome core complex, alpha-subunit complex	cellular_component	0.012077	0.22417	23	17460	67	76974	10	13
GO:0009790	embryo development	biological_process	0.0127	0.2348	16	17460	41	76974	10	6
GO:0000774	adenyl-nucleotide exchange factor activity	molecular_function	0.017386	0.29264	25	17460	74	76974	10	15
GO:0004869	cysteine-type endopeptidase inhibitor activity	molecular_function	0.034522	0.48508	12	17460	33	76974	10	2
GO:0007131	reciprocal meiotic recombination	biological_process	0.039478	0.51707	15	17460	42	76974	10	5
GO:0035825	reciprocal DNA recombination	biological_process	0.039478	0.51707	15	17460	42	76974	10	5
GO:0008661	1-deoxy-D-xylulose-5-phosphate synthase activity	molecular_function	0.054967	0.61752	18	17460	54	76974	10	8
GO:0016744	transferase activity, transferring aldehyde or ketonic groups	molecular_function	0.054967	0.61752	18	17460	54	76974	10	8
GO:0035064	methylated histone binding	molecular_function	0.057255	0.64016	10	17460	26	76974	10	0
GO:2000026	regulation of multicellular organismal development	biological_process	0.084482	0.79433	15	17460	47	76974	10	5
GO:0006537	glutamate biosynthetic process	biological_process	0.12148	0.99284	22	17460	76	76974	10	12
GO:0043650	dicarboxylic acid biosynthetic process	biological_process	0.12148	0.99284	22	17460	76	76974	10	12
GO:0015930	glutamate synthase activity	molecular_function	0.13567	1	22	17460	77	76974	10	12
GO:0018580	nitronate monooxygenase activity	molecular_function	0.17441	1	19	17460	68	76974	10	9
GO:0004665	prephenate dehydrogenase (NADP+) activity	molecular_function	0.20046	1	10	17460	33	76974	10	0
GO:0006571	tyrosine biosynthetic process	biological_process	0.20046	1	10	17460	33	76974	10	0
GO:0008977	prephenate dehydrogenase activity	molecular_function	0.20046	1	10	17460	33	76974	10	0
GO:0008064	regulation of actin polymerization or depolymerization	biological_process	0.21082	1	18	17460	66	76974	10	8
GO:0008154	actin polymerization or depolymerization	biological_process	0.21082	1	18	17460	66	76974	10	8
GO:0030041	actin filament polymerization	biological_process	0.21082	1	18	17460	66	76974	10	8
GO:0030832	regulation of actin filament length	biological_process	0.21082	1	18	17460	66	76974	10	8
GO:0030833	regulation of actin filament polymerization	biological_process	0.21082	1	18	17460	66	76974	10	8
GO:0032271	regulation of protein polymerization	biological_process	0.21082	1	18	17460	66	76974	10	8
GO:0032535	regulation of cellular component size	biological_process	0.21082	1	18	17460	66	76974	10	8
GO:0032956	regulation of actin cytoskeleton organization	biological_process	0.21082	1	18	17460	66	76974	10	8
GO:0032970	regulation of actin filament-based process	biological_process	0.21082	1	18	17460	66	76974	10	8
GO:0043254	regulation of protein complex assembly	biological_process	0.21082	1	18	17460	66	76974	10	8
GO:0005234	extracellular-glutamate-gated ion channel activity	molecular_function	0.21739	1	20	17460	72	76974	10	10
GO:0005402	cation:sugar symporter activity	molecular_function	0.23006	1	16	17460	58	76974	10	6
GO:0006743	ubiquinone metabolic process	biological_process	0.24717	1	11	17460	39	76974	10	1
GO:0006744	ubiquinone biosynthetic process	biological_process	0.24717	1	11	17460	39	76974	10	1
GO:0008094	DNA-dependent ATPase activity	molecular_function	0.28338	1	32	17460	127	76974	10	22
GO:0051239	regulation of multicellular organismal process	biological_process	0.28558	1	15	17460	57	76974	10	5
GO:0042775	mitochondrial ATP synthesis coupled electron transport	biological_process	0.29409	1	19	17460	76	76974	10	9
GO:1901661	quinone metabolic process	biological_process	0.30432	1	13	17460	49	76974	10	3
GO:1901663	quinone biosynthetic process	biological_process	0.30432	1	13	17460	49	76974	10	3
GO:0090066	regulation of anatomical structure size	biological_process	0.32205	1	18	17460	71	76974	10	8
GO:0042181	ketone biosynthetic process	biological_process	0.33346	1	13	17460	50	76974	10	3
GO:0005351	sugar:proton symporter activity	molecular_function	0.36371	1	14	17460	55	76974	10	4
GO:0015295	solute:proton symporter activity	molecular_function	0.36371	1	14	17460	55	76974	10	4
GO:0005047	signal recognition particle binding	molecular_function	0.37104	1	14	17460	55	76974	10	4
GO:0004520	endodeoxyribonuclease activity	molecular_function	0.42186	1	19	17460	79	76974	10	9
GO:0008053	mitochondrial fusion	biological_process	0.42623	1	16	17460	67	76974	10	6
GO:0030983	mismatched DNA binding	molecular_function	0.45657	1	23	17460	96	76974	10	13
GO:0006119	oxidative phosphorylation	biological_process	0.4576	1	19	17460	83	76974	10	9
GO:0042773	ATP synthesis coupled electron transport	biological_process	0.4576	1	19	17460	83	76974	10	9
GO:0007015	actin filament organization	biological_process	0.46125	1	19	17460	81	76974	10	9
GO:0030203	glycosaminoglycan metabolic process	biological_process	0.49246	1	12	17460	51	76974	10	2
GO:0050793	regulation of developmental process	biological_process	0.52427	1	17	17460	76	76974	10	7
GO:0019953	sexual reproduction	biological_process	0.54041	1	24	17460	107	76974	10	14
GO:0016226	iron-sulfur cluster assembly	biological_process	0.59978	1	16	17460	75	76974	10	6
GO:0031163	metallo-sulfur cluster assembly	biological_process	0.59978	1	16	17460	75	76974	10	6
GO:0019207	kinase regulator activity	molecular_function	0.60173	1	18	17460	83	76974	10	8
GO:0009288	bacterial-type flagellum	cellular_component	0.62952	1	18	17460	84	76974	10	8
GO:0003729	mRNA binding	molecular_function	0.66308	1	12	17460	57	76974	10	2
GO:0044822	poly(A) RNA binding	molecular_function	0.66308	1	12	17460	57	76974	10	2
GO:0007030	Golgi organization	biological_process	0.66415	1	22	17460	102	76974	10	12
GO:0006020	inositol metabolic process	biological_process	0.68748	1	13	17460	62	76974	10	3
GO:0051130	positive regulation of cellular component organization	biological_process	0.73834	1	17	17460	87	76974	10	7
GO:0004612	phosphoenolpyruvate carboxykinase (ATP) activity	molecular_function	0.78973	1	15	17460	76	76974	10	5
GO:0016811	hydrolase activity, acting on carbon-nitrogen (but not peptide) bonds, in linear amides	molecular_function	0.80196	1	18	17460	94	76974	10	8
GO:0009063	cellular amino acid catabolic process	biological_process	0.83428	1	22	17460	113	76974	10	12
GO:0044743	intracellular protein transmembrane import	biological_process	0.8383	1	15	17460	82	76974	10	5
GO:0008276	protein methyltransferase activity	molecular_function	0.84304	1	26	17460	134	76974	10	16
GO:0065002	intracellular protein transmembrane transport	biological_process	0.88549	1	15	17460	86	76974	10	5
GO:0033646	host intracellular part	cellular_component	0.89047	1	19	17460	106	76974	10	9
GO:0043656	intracellular region of host	cellular_component	0.89047	1	19	17460	106	76974	10	9
GO:0006777	Mo-molybdopterin cofactor biosynthetic process	biological_process	0.92275	1	15	17460	87	76974	10	5
GO:0019720	Mo-molybdopterin cofactor metabolic process	biological_process	0.92275	1	15	17460	87	76974	10	5
GO:0030162	regulation of proteolysis	biological_process	0.94319	1	15	17460	91	76974	10	5
GO:0003697	single-stranded DNA binding	molecular_function	0.94519	1	12	17460	75	76974	10	2
GO:0008948	oxaloacetate decarboxylase activity	molecular_function	0.95907	1	15	17460	101	76974	10	5
GO:0035725	sodium ion transmembrane transport	biological_process	0.95907	1	15	17460	101	76974	10	5
GO:0071436	sodium ion export	biological_process	0.95907	1	15	17460	101	76974	10	5
GO:0005985	sucrose metabolic process	biological_process	0.96139	1	20	17460	118	76974	10	10
GO:0006094	gluconeogenesis	biological_process	0.96321	1	18	17460	110	76974	10	8
GO:0019319	hexose biosynthetic process	biological_process	0.96321	1	18	17460	110	76974	10	8
GO:0046364	monosaccharide biosynthetic process	biological_process	0.96321	1	18	17460	110	76974	10	8
GO:0016886	ligase activity, forming phosphoric ester bonds	molecular_function	0.96733	1	17	17460	106	76974	10	7
GO:0009891	positive regulation of biosynthetic process	biological_process	0.97788	1	17	17460	112	76974	10	7
GO:0010557	positive regulation of macromolecule biosynthetic process	biological_process	0.97788	1	17	17460	112	76974	10	7
GO:0031328	positive regulation of cellular biosynthetic process	biological_process	0.97788	1	17	17460	112	76974	10	7
GO:0051173	positive regulation of nitrogen compound metabolic process	biological_process	0.97788	1	17	17460	112	76974	10	7
GO:0043161	proteasome-mediated ubiquitin-dependent protein catabolic process	biological_process	0.98532	1	19	17460	124	76974	10	9
GO:0010498	proteasomal protein catabolic process	biological_process	0.98836	1	19	17460	126	76974	10	9
GO:0006891	intra-Golgi vesicle-mediated transport	biological_process	0.99524	1	15	17460	111	76974	10	5
GO:0006874	cellular calcium ion homeostasis	biological_process	0.99822	1	17	17460	136	76974	10	7
GO:0055074	calcium ion homeostasis	biological_process	0.99822	1	17	17460	136	76974	10	7
GO:0072503	cellular divalent inorganic cation homeostasis	biological_process	0.99822	1	17	17460	136	76974	10	7
GO:0072507	divalent inorganic cation homeostasis	biological_process	0.99822	1	17	17460	136	76974	10	7
GO:1903509	liposaccharide metabolic process	biological_process	0.99973	1	26	17460	203	76974	10	16
GO:0010333	terpene synthase activity	molecular_function	2.1548e-06	0.00014252	78	17460	210	76974	9	69
GO:0016998	cell wall macromolecule catabolic process	biological_process	0.0036928	0.083776	14	17460	32	76974	9	5
GO:0006026	aminoglycan catabolic process	biological_process	0.012907	0.23769	14	17460	36	76974	9	5
GO:0005544	calcium-dependent phospholipid binding	molecular_function	0.022524	0.34453	19	17460	54	76974	9	10
GO:0030599	pectinesterase activity	molecular_function	0.041239	0.52768	31	17460	100	76974	9	22
GO:0042545	cell wall modification	biological_process	0.041239	0.52768	31	17460	100	76974	9	22
GO:0030155	regulation of cell adhesion	biological_process	0.05319	0.61335	15	17460	44	76974	9	6
GO:0019682	glyceraldehyde-3-phosphate metabolic process	biological_process	0.079866	0.7732	15	17460	46	76974	9	6
GO:0031124	mRNA 3'-end processing	biological_process	0.081516	0.78282	11	17460	32	76974	9	2
GO:0080134	regulation of response to stress	biological_process	0.084398	0.79433	19	17460	62	76974	9	10
GO:0031123	RNA 3'-end processing	biological_process	0.16241	1	11	17460	36	76974	9	2
GO:0016655	oxidoreductase activity, acting on NAD(P)H, quinone or similar compound as acceptor	molecular_function	0.3628	1	22	17460	93	76974	9	13
GO:0006030	chitin metabolic process	biological_process	0.36479	1	14	17460	57	76974	9	5
GO:1901071	glucosamine-containing compound metabolic process	biological_process	0.36479	1	14	17460	57	76974	9	5
GO:0016846	carbon-sulfur lyase activity	molecular_function	0.51075	1	15	17460	68	76974	9	6
GO:0004176	ATP-dependent peptidase activity	molecular_function	0.51398	1	10	17460	42	76974	9	1
GO:0044036	cell wall macromolecule metabolic process	biological_process	0.53303	1	14	17460	63	76974	9	5
GO:0044702	single organism reproductive process	biological_process	0.53689	1	22	17460	98	76974	9	13
GO:0006541	glutamine metabolic process	biological_process	0.61421	1	22	17460	100	76974	9	13
GO:0016790	thiolester hydrolase activity	molecular_function	0.65989	1	29	17460	135	76974	9	20
GO:0042546	cell wall biogenesis	biological_process	0.68989	1	13	17460	62	76974	9	4
GO:0009507	chloroplast	cellular_component	0.69631	1	20	17460	103	76974	9	11
GO:0009536	plastid	cellular_component	0.69631	1	20	17460	103	76974	9	11
GO:0016861	intramolecular oxidoreductase activity, interconverting aldoses and ketoses	molecular_function	0.71693	1	17	17460	84	76974	9	8
GO:0004140	dephospho-CoA kinase activity	molecular_function	0.7432	1	14	17460	70	76974	9	5
GO:0004813	alanine-tRNA ligase activity	molecular_function	0.77507	1	14	17460	70	76974	9	5
GO:0006419	alanyl-tRNA aminoacylation	biological_process	0.77507	1	14	17460	70	76974	9	5
GO:1901606	alpha-amino acid catabolic process	biological_process	0.79097	1	21	17460	105	76974	9	12
GO:0004512	inositol-3-phosphate synthase activity	molecular_function	0.82531	1	10	17460	54	76974	9	1
GO:0006021	inositol biosynthetic process	biological_process	0.82531	1	10	17460	54	76974	9	1
GO:0046173	polyol biosynthetic process	biological_process	0.82531	1	10	17460	54	76974	9	1
GO:0000276	mitochondrial proton-transporting ATP synthase complex, coupling factor F(o)	cellular_component	0.83915	1	17	17460	94	76974	9	8
GO:0004129	cytochrome-c oxidase activity	molecular_function	0.8547	1	18	17460	100	76974	9	9
GO:0016675	oxidoreductase activity, acting on a heme group of donors	molecular_function	0.8547	1	18	17460	100	76974	9	9
GO:0016676	oxidoreductase activity, acting on a heme group of donors, oxygen as acceptor	molecular_function	0.8547	1	18	17460	100	76974	9	9
GO:0015002	heme-copper terminal oxidase activity	molecular_function	0.85532	1	20	17460	110	76974	9	11
GO:0033647	host intracellular organelle	cellular_component	0.85588	1	18	17460	98	76974	9	9
GO:0033648	host intracellular membrane-bounded organelle	cellular_component	0.85588	1	18	17460	98	76974	9	9
GO:0003995	acyl-CoA dehydrogenase activity	molecular_function	0.87004	1	16	17460	86	76974	9	7
GO:0046165	alcohol biosynthetic process	biological_process	0.87035	1	10	17460	57	76974	9	1
GO:0016157	sucrose synthase activity	molecular_function	0.87093	1	19	17460	100	76974	9	10
GO:0045263	proton-transporting ATP synthase complex, coupling factor F(o)	cellular_component	0.88491	1	26	17460	144	76974	9	17
GO:0016278	lysine N-methyltransferase activity	molecular_function	0.89972	1	21	17460	115	76974	9	12
GO:0016279	protein-lysine N-methyltransferase activity	molecular_function	0.89972	1	21	17460	115	76974	9	12
GO:0018024	histone-lysine N-methyltransferase activity	molecular_function	0.89972	1	21	17460	115	76974	9	12
GO:0042054	histone methyltransferase activity	molecular_function	0.89972	1	21	17460	115	76974	9	12
GO:0010639	negative regulation of organelle organization	biological_process	0.92119	1	16	17460	94	76974	9	7
GO:0045935	positive regulation of nucleobase-containing compound metabolic process	biological_process	0.92807	1	16	17460	94	76974	9	7
GO:0051254	positive regulation of RNA metabolic process	biological_process	0.92807	1	16	17460	94	76974	9	7
GO:1902680	positive regulation of RNA biosynthetic process	biological_process	0.92807	1	16	17460	94	76974	9	7
GO:0009060	aerobic respiration	biological_process	0.93046	1	16	17460	93	76974	9	7
GO:0044003	modification by symbiont of host morphology or physiology	biological_process	0.95214	1	15	17460	94	76974	9	6
GO:0051817	modification of morphology or physiology of other organism involved in symbiotic interaction	biological_process	0.95214	1	15	17460	94	76974	9	6
GO:0051129	negative regulation of cellular component organization	biological_process	0.96625	1	16	17460	102	76974	9	7
GO:0006402	mRNA catabolic process	biological_process	0.97018	1	23	17460	139	76974	9	14
GO:0010564	regulation of cell cycle process	biological_process	0.97435	1	14	17460	93	76974	9	5
GO:0006401	RNA catabolic process	biological_process	0.97558	1	23	17460	141	76974	9	14
GO:0005217	intracellular ligand-gated ion channel activity	molecular_function	0.99461	1	14	17460	108	76974	9	5
GO:0005218	intracellular ligand-gated calcium channel activity	molecular_function	0.99461	1	14	17460	108	76974	9	5
GO:0005219	ryanodine-sensitive calcium-release channel activity	molecular_function	0.99461	1	14	17460	108	76974	9	5
GO:0015278	calcium-release channel activity	molecular_function	0.99461	1	14	17460	108	76974	9	5
GO:0001510	RNA methylation	biological_process	0.99665	1	17	17460	126	76974	9	8
GO:0006304	DNA modification	biological_process	0.99842	1	20	17460	160	76974	9	11
GO:0004568	chitinase activity	molecular_function	0.00043199	0.014916	13	17460	24	76974	8	5
GO:0006032	chitin catabolic process	biological_process	0.0028199	0.06722	13	17460	28	76974	8	5
GO:0046348	amino sugar catabolic process	biological_process	0.0028199	0.06722	13	17460	28	76974	8	5
GO:1901072	glucosamine-containing compound catabolic process	biological_process	0.0028199	0.06722	13	17460	28	76974	8	5
GO:0042262	DNA protection	biological_process	0.014132	0.25234	10	17460	22	76974	8	2
GO:0004315	3-oxoacyl-[acyl-carrier-protein] synthase activity	molecular_function	0.015106	0.26176	29	17460	86	76974	8	21
GO:0004312	fatty acid synthase activity	molecular_function	0.017828	0.29687	29	17460	87	76974	8	21
GO:0015159	polysaccharide transmembrane transporter activity	molecular_function	0.025396	0.38347	10	17460	25	76974	8	2
GO:0015774	polysaccharide transport	biological_process	0.033304	0.47393	10	17460	26	76974	8	2
GO:0033037	polysaccharide localization	biological_process	0.033304	0.47393	10	17460	26	76974	8	2
GO:0045995	regulation of embryonic development	biological_process	0.035561	0.48633	13	17460	35	76974	8	5
GO:0004743	pyruvate kinase activity	molecular_function	0.045978	0.56981	22	17460	67	76974	8	14
GO:0016843	amine-lyase activity	molecular_function	0.051423	0.6022	13	17460	37	76974	8	5
GO:0016844	strictosidine synthase activity	molecular_function	0.051423	0.6022	13	17460	37	76974	8	5
GO:0016477	cell migration	biological_process	0.053516	0.61335	13	17460	37	76974	8	5
GO:0030334	regulation of cell migration	biological_process	0.053516	0.61335	13	17460	37	76974	8	5
GO:0007129	synapsis	biological_process	0.070401	0.73795	9	17460	24	76974	8	1
GO:0007130	synaptonemal complex assembly	biological_process	0.070401	0.73795	9	17460	24	76974	8	1
GO:0045143	homologous chromosome segregation	biological_process	0.070401	0.73795	9	17460	24	76974	8	1
GO:0070192	chromosome organization involved in meiosis	biological_process	0.070401	0.73795	9	17460	24	76974	8	1
GO:0070193	synaptonemal complex organization	biological_process	0.070401	0.73795	9	17460	24	76974	8	1
GO:0009916	alternative oxidase activity	molecular_function	0.07132	0.74261	8	17460	21	76974	8	0
GO:0051270	regulation of cellular component movement	biological_process	0.079525	0.7732	13	17460	39	76974	8	5
GO:2000145	regulation of cell motility	biological_process	0.079525	0.7732	13	17460	39	76974	8	5
GO:0044462	external encapsulating structure part	cellular_component	0.084925	0.79603	13	17460	39	76974	8	5
GO:0006098	pentose-phosphate shunt	biological_process	0.09022	0.82267	14	17460	43	76974	8	6
GO:0051156	glucose 6-phosphate metabolic process	biological_process	0.09022	0.82267	14	17460	43	76974	8	6
GO:0015925	galactosidase activity	molecular_function	0.1009	0.88402	36	17460	128	76974	8	28
GO:0030313	cell envelope	cellular_component	0.10117	0.8847	13	17460	40	76974	8	5
GO:0030151	molybdenum ion binding	molecular_function	0.12681	1	18	17460	60	76974	8	10
GO:0000723	telomere maintenance	biological_process	0.14661	1	23	17460	80	76974	8	15
GO:0032200	telomere organization	biological_process	0.14661	1	23	17460	80	76974	8	15
GO:0060249	anatomical structure homeostasis	biological_process	0.14661	1	23	17460	80	76974	8	15
GO:0040012	regulation of locomotion	biological_process	0.15219	1	13	17460	43	76974	8	5
GO:0045132	meiotic chromosome segregation	biological_process	0.19059	1	9	17460	29	76974	8	1
GO:0015098	molybdate ion transmembrane transporter activity	molecular_function	0.20301	1	15	17460	52	76974	8	7
GO:0015689	molybdate ion transport	biological_process	0.20301	1	15	17460	52	76974	8	7
GO:0010638	positive regulation of organelle organization	biological_process	0.2275	1	15	17460	54	76974	8	7
GO:0008121	ubiquinol-cytochrome-c reductase activity	molecular_function	0.2308	1	17	17460	64	76974	8	9
GO:0016681	oxidoreductase activity, acting on diphenols and related substances as donors, cytochrome as acceptor	molecular_function	0.2308	1	17	17460	64	76974	8	9
GO:0070069	cytochrome complex	cellular_component	0.24282	1	16	17460	62	76974	8	8
GO:0004298	threonine-type endopeptidase activity	molecular_function	0.24868	1	25	17460	101	76974	8	17
GO:0070003	threonine-type peptidase activity	molecular_function	0.24868	1	25	17460	101	76974	8	17
GO:0006473	protein acetylation	biological_process	0.25836	1	9	17460	31	76974	8	1
GO:0006475	internal protein amino acid acetylation	biological_process	0.25836	1	9	17460	31	76974	8	1
GO:0016573	histone acetylation	biological_process	0.25836	1	9	17460	31	76974	8	1
GO:0018393	internal peptidyl-lysine acetylation	biological_process	0.25836	1	9	17460	31	76974	8	1
GO:0018394	peptidyl-lysine acetylation	biological_process	0.25836	1	9	17460	31	76974	8	1
GO:0043543	protein acylation	biological_process	0.25836	1	9	17460	31	76974	8	1
GO:0000118	histone deacetylase complex	cellular_component	0.32289	1	12	17460	47	76974	8	4
GO:0016575	histone deacetylation	biological_process	0.32289	1	12	17460	47	76974	8	4
GO:0070823	HDA1 complex	cellular_component	0.32289	1	12	17460	47	76974	8	4
GO:0006476	protein deacetylation	biological_process	0.35	1	13	17460	52	76974	8	5
GO:0035601	protein deacylation	biological_process	0.35	1	13	17460	52	76974	8	5
GO:0098732	macromolecule deacylation	biological_process	0.35	1	13	17460	52	76974	8	5
GO:0006302	double-strand break repair	biological_process	0.35212	1	18	17460	72	76974	8	10
GO:0004112	cyclic-nucleotide phosphodiesterase activity	molecular_function	0.36109	1	11	17460	42	76974	8	3
GO:0005451	monovalent cation:proton antiporter activity	molecular_function	0.36134	1	12	17460	46	76974	8	4
GO:0015491	cation:cation antiporter activity	molecular_function	0.36134	1	12	17460	46	76974	8	4
GO:0004089	carbonate dehydratase activity	molecular_function	0.37167	1	14	17460	57	76974	8	6
GO:0032269	negative regulation of cellular protein metabolic process	biological_process	0.3718	1	23	17460	94	76974	8	15
GO:0051248	negative regulation of protein metabolic process	biological_process	0.3718	1	23	17460	94	76974	8	15
GO:0005092	GDP-dissociation inhibitor activity	molecular_function	0.3773	1	16	17460	64	76974	8	8
GO:0015095	magnesium ion transmembrane transporter activity	molecular_function	0.39858	1	20	17460	81	76974	8	12
GO:0015693	magnesium ion transport	biological_process	0.39858	1	20	17460	81	76974	8	12
GO:0015385	sodium:proton antiporter activity	molecular_function	0.41354	1	10	17460	39	76974	8	2
GO:0016840	carbon-nitrogen lyase activity	molecular_function	0.43928	1	13	17460	54	76974	8	5
GO:0006415	translational termination	biological_process	0.44081	1	20	17460	85	76974	8	12
GO:0005746	mitochondrial respiratory chain	cellular_component	0.46615	1	16	17460	72	76974	8	8
GO:0072528	pyrimidine-containing compound biosynthetic process	biological_process	0.47713	1	22	17460	96	76974	8	14
GO:0007409	axonogenesis	biological_process	0.47999	1	8	17460	36	76974	8	0
GO:0007411	axon guidance	biological_process	0.47999	1	8	17460	36	76974	8	0
GO:0048667	cell morphogenesis involved in neuron differentiation	biological_process	0.47999	1	8	17460	36	76974	8	0
GO:0048812	neuron projection morphogenesis	biological_process	0.47999	1	8	17460	36	76974	8	0
GO:0061564	axon development	biological_process	0.47999	1	8	17460	36	76974	8	0
GO:0097485	neuron projection guidance	biological_process	0.47999	1	8	17460	36	76974	8	0
GO:0003872	6-phosphofructokinase activity	molecular_function	0.48419	1	13	17460	54	76974	8	5
GO:0043066	negative regulation of apoptotic process	biological_process	0.50932	1	10	17460	43	76974	8	2
GO:0043069	negative regulation of programmed cell death	biological_process	0.50932	1	10	17460	43	76974	8	2
GO:0060548	negative regulation of cell death	biological_process	0.50932	1	10	17460	43	76974	8	2
GO:0005874	microtubule	cellular_component	0.54927	1	17	17460	75	76974	8	9
GO:0005876	spindle microtubule	cellular_component	0.54927	1	17	17460	75	76974	8	9
GO:0000904	cell morphogenesis involved in differentiation	biological_process	0.5549	1	8	17460	38	76974	8	0
GO:0005319	lipid transporter activity	molecular_function	0.56522	1	10	17460	47	76974	8	2
GO:0031023	microtubule organizing center organization	biological_process	0.58625	1	17	17460	76	76974	8	9
GO:0016307	phosphatidylinositol phosphate kinase activity	molecular_function	0.59071	1	14	17460	62	76974	8	6
GO:0007008	outer mitochondrial membrane organization	biological_process	0.59845	1	10	17460	45	76974	8	2
GO:0045040	protein import into mitochondrial outer membrane	biological_process	0.59845	1	10	17460	45	76974	8	2
GO:0090151	establishment of protein localization to mitochondrial membrane	biological_process	0.59845	1	10	17460	45	76974	8	2
GO:0016888	endodeoxyribonuclease activity, producing 5'-phosphomonoesters	molecular_function	0.62013	1	12	17460	56	76974	8	4
GO:0043086	negative regulation of catalytic activity	biological_process	0.66418	1	20	17460	96	76974	8	12
GO:0044092	negative regulation of molecular function	biological_process	0.66418	1	20	17460	96	76974	8	12
GO:0032990	cell part morphogenesis	biological_process	0.67168	1	8	17460	42	76974	8	0
GO:0048858	cell projection morphogenesis	biological_process	0.67168	1	8	17460	42	76974	8	0
GO:0048584	positive regulation of response to stimulus	biological_process	0.68176	1	13	17460	63	76974	8	5
GO:0016571	histone methylation	biological_process	0.69115	1	16	17460	75	76974	8	8
GO:0018022	peptidyl-lysine methylation	biological_process	0.69115	1	16	17460	75	76974	8	8
GO:0034968	histone lysine methylation	biological_process	0.69115	1	16	17460	75	76974	8	8
GO:0008172	S-methyltransferase activity	molecular_function	0.69627	1	16	17460	77	76974	8	8
GO:0004843	ubiquitin-specific protease activity	molecular_function	0.75363	1	11	17460	56	76974	8	3
GO:2001070	starch binding	molecular_function	0.78962	1	15	17460	77	76974	8	7
GO:0070469	respiratory chain	cellular_component	0.806	1	16	17460	88	76974	8	8
GO:0006099	tricarboxylic acid cycle	biological_process	0.83701	1	15	17460	79	76974	8	7
GO:0006101	citrate metabolic process	biological_process	0.83701	1	15	17460	79	76974	8	7
GO:0072350	tricarboxylic acid metabolic process	biological_process	0.83841	1	16	17460	84	76974	8	8
GO:0051028	mRNA transport	biological_process	0.84694	1	20	17460	105	76974	8	12
GO:0043244	regulation of protein complex disassembly	biological_process	0.86605	1	11	17460	64	76974	8	3
GO:0045786	negative regulation of cell cycle	biological_process	0.88644	1	14	17460	80	76974	8	6
GO:0042025	host cell nucleus	cellular_component	0.88831	1	16	17460	91	76974	8	8
GO:1901068	guanosine-containing compound metabolic process	biological_process	0.89251	1	12	17460	70	76974	8	4
GO:0000075	cell cycle checkpoint	biological_process	0.89984	1	16	17460	91	76974	8	8
GO:0004177	aminopeptidase activity	molecular_function	0.91196	1	29	17460	154	76974	8	21
GO:0045893	positive regulation of transcription, DNA-templated	biological_process	0.9142	1	15	17460	87	76974	8	7
GO:1903508	positive regulation of nucleic acid-templated transcription	biological_process	0.9142	1	15	17460	87	76974	8	7
GO:0015932	nucleobase-containing compound transmembrane transporter activity	molecular_function	0.92035	1	23	17460	135	76974	8	15
GO:0006835	dicarboxylic acid transport	biological_process	0.9417	1	21	17460	126	76974	8	13
GO:0004594	pantothenate kinase activity	molecular_function	0.94535	1	8	17460	53	76974	8	0
GO:0033926	glycopeptide alpha-N-acetylgalactosaminidase activity	molecular_function	0.95808	1	10	17460	66	76974	8	2
GO:0000049	tRNA binding	molecular_function	0.98195	1	23	17460	144	76974	8	15
GO:0016458	gene silencing	biological_process	0.98611	1	10	17460	74	76974	8	2
GO:0031047	gene silencing by RNA	biological_process	0.98746	1	9	17460	69	76974	8	1
GO:0005635	nuclear envelope	cellular_component	0.9888	1	17	17460	114	76974	8	9
GO:0043015	gamma-tubulin binding	molecular_function	0.98976	1	12	17460	87	76974	8	4
GO:0000070	mitotic sister chromatid segregation	biological_process	0.99007	1	12	17460	89	76974	8	4
GO:0000819	sister chromatid segregation	biological_process	0.99007	1	12	17460	89	76974	8	4
GO:0006383	transcription from RNA polymerase III promoter	biological_process	0.99402	1	16	17460	121	76974	8	8
GO:0005777	peroxisome	cellular_component	0.99954	1	12	17460	114	76974	8	4
GO:0042579	microbody	cellular_component	0.99954	1	12	17460	114	76974	8	4
GO:0006664	glycolipid metabolic process	biological_process	0.99967	1	24	17460	190	76974	8	16
GO:0009247	glycolipid biosynthetic process	biological_process	0.99967	1	24	17460	190	76974	8	16
GO:0046467	membrane lipid biosynthetic process	biological_process	0.99967	1	24	17460	190	76974	8	16
GO:0000148	1,3-beta-D-glucan synthase complex	cellular_component	1	1	9	17460	139	76974	8	1
GO:0003843	1,3-beta-D-glucan synthase activity	molecular_function	1	1	9	17460	139	76974	8	1
GO:0006074	(1->3)-beta-D-glucan metabolic process	biological_process	1	1	9	17460	139	76974	8	1
GO:0006075	(1->3)-beta-D-glucan biosynthetic process	biological_process	1	1	9	17460	139	76974	8	1
GO:0019684	photosynthesis, light reaction	biological_process	0.00015783	0.0066175	47	17460	126	76974	7	40
GO:0004435	phosphatidylinositol phospholipase C activity	molecular_function	0.0014877	0.0426	13	17460	25	76974	7	6
GO:0004629	phospholipase C activity	molecular_function	0.0014877	0.0426	13	17460	25	76974	7	6
GO:0005811	lipid particle	cellular_component	0.01772	0.29614	8	17460	17	76974	7	1
GO:0012511	monolayer-surrounded lipid storage body	cellular_component	0.01772	0.29614	8	17460	17	76974	7	1
GO:0004620	phospholipase activity	molecular_function	0.038778	0.51257	13	17460	35	76974	7	6
GO:0009522	photosystem I	cellular_component	0.038857	0.51257	27	17460	91	76974	7	20
GO:0051537	2 iron, 2 sulfur cluster binding	molecular_function	0.049588	0.60017	19	17460	58	76974	7	12
GO:0006480	N-terminal protein amino acid methylation	biological_process	0.065668	0.7155	10	17460	28	76974	7	3
GO:0031365	N-terminal protein amino acid modification	biological_process	0.065668	0.7155	10	17460	28	76974	7	3
GO:0005849	mRNA cleavage factor complex	cellular_component	0.11359	0.96283	7	17460	19	76974	7	0
GO:0006378	mRNA polyadenylation	biological_process	0.11359	0.96283	7	17460	19	76974	7	0
GO:0009279	cell outer membrane	cellular_component	0.11462	0.96973	8	17460	22	76974	7	1
GO:0006029	proteoglycan metabolic process	biological_process	0.17004	1	8	17460	24	76974	7	1
GO:0015012	heparan sulfate proteoglycan biosynthetic process	biological_process	0.17004	1	8	17460	24	76974	7	1
GO:0030166	proteoglycan biosynthetic process	biological_process	0.17004	1	8	17460	24	76974	7	1
GO:0030201	heparan sulfate proteoglycan metabolic process	biological_process	0.17004	1	8	17460	24	76974	7	1
GO:0003747	translation release factor activity	molecular_function	0.17324	1	19	17460	67	76974	7	12
GO:0008079	translation termination factor activity	molecular_function	0.17324	1	19	17460	67	76974	7	12
GO:0009074	aromatic amino acid family catabolic process	biological_process	0.17753	1	8	17460	25	76974	7	1
GO:0030915	Smc5-Smc6 complex	cellular_component	0.19957	1	15	17460	52	76974	7	8
GO:0044769	ATPase activity, coupled to transmembrane movement of ions, rotational mechanism	molecular_function	0.22007	1	14	17460	51	76974	7	7
GO:0005750	mitochondrial respiratory chain complex III	cellular_component	0.22267	1	12	17460	44	76974	7	5
GO:0006122	mitochondrial electron transport, ubiquinol to cytochrome c	biological_process	0.22267	1	12	17460	44	76974	7	5
GO:0045275	respiratory chain complex III	cellular_component	0.22267	1	12	17460	44	76974	7	5
GO:0051052	regulation of DNA metabolic process	biological_process	0.28746	1	12	17460	44	76974	7	5
GO:0016671	oxidoreductase activity, acting on a sulfur group of donors, disulfide as acceptor	molecular_function	0.29754	1	9	17460	34	76974	7	2
GO:0016049	cell growth	biological_process	0.30596	1	9	17460	32	76974	7	2
GO:0044093	positive regulation of molecular function	biological_process	0.31031	1	7	17460	24	76974	7	0
GO:0005786	signal recognition particle, endoplasmic reticulum targeting	cellular_component	0.3252	1	9	17460	34	76974	7	2
GO:0030942	endoplasmic reticulum signal peptide binding	molecular_function	0.3252	1	9	17460	34	76974	7	2
GO:0004650	polygalacturonase activity	molecular_function	0.32776	1	15	17460	58	76974	7	8
GO:0005126	cytokine receptor binding	molecular_function	0.35828	1	16	17460	63	76974	7	9
GO:0051015	actin filament binding	molecular_function	0.37454	1	8	17460	30	76974	7	1
GO:0006024	glycosaminoglycan biosynthetic process	biological_process	0.37636	1	8	17460	30	76974	7	1
GO:0019829	cation-transporting ATPase activity	molecular_function	0.37684	1	14	17460	57	76974	7	7
GO:0042625	ATPase activity, coupled to transmembrane movement of ions	molecular_function	0.37684	1	14	17460	57	76974	7	7
GO:0009539	photosystem II reaction center	cellular_component	0.38214	1	13	17460	52	76974	7	6
GO:0009307	DNA restriction-modification system	biological_process	0.41639	1	12	17460	49	76974	7	5
GO:0044355	clearance of foreign intracellular DNA	biological_process	0.41639	1	12	17460	49	76974	7	5
GO:0015969	guanosine tetraphosphate metabolic process	biological_process	0.42245	1	10	17460	39	76974	7	3
GO:0034035	purine ribonucleoside bisphosphate metabolic process	biological_process	0.42245	1	10	17460	39	76974	7	3
GO:0003989	acetyl-CoA carboxylase activity	molecular_function	0.42643	1	12	17460	48	76974	7	5
GO:0016421	CoA carboxylase activity	molecular_function	0.42643	1	12	17460	48	76974	7	5
GO:0016885	ligase activity, forming carbon-carbon bonds	molecular_function	0.42643	1	12	17460	48	76974	7	5
GO:0004565	beta-galactosidase activity	molecular_function	0.43981	1	24	17460	100	76974	7	17
GO:0019900	kinase binding	molecular_function	0.46425	1	25	17460	107	76974	7	18
GO:0098803	respiratory chain complex	cellular_component	0.47492	1	15	17460	68	76974	7	8
GO:0007276	gamete generation	biological_process	0.48018	1	14	17460	60	76974	7	7
GO:0019901	protein kinase binding	molecular_function	0.49183	1	24	17460	104	76974	7	17
GO:0032504	multicellular organism reproduction	biological_process	0.51347	1	16	17460	70	76974	7	9
GO:0009617	response to bacterium	biological_process	0.5164	1	12	17460	54	76974	7	5
GO:0042742	defense response to bacterium	biological_process	0.5164	1	12	17460	54	76974	7	5
GO:0051260	protein homooligomerization	biological_process	0.52321	1	9	17460	38	76974	7	2
GO:0003918	DNA topoisomerase type II (ATP-hydrolyzing) activity	molecular_function	0.54927	1	9	17460	39	76974	7	2
GO:0061505	DNA topoisomerase II activity	molecular_function	0.54927	1	9	17460	39	76974	7	2
GO:0048609	multicellular organismal reproductive process	biological_process	0.55046	1	15	17460	67	76974	7	8
GO:0006359	regulation of transcription from RNA polymerase III promoter	biological_process	0.55725	1	13	17460	59	76974	7	6
GO:0009967	positive regulation of signal transduction	biological_process	0.63003	1	12	17460	56	76974	7	5
GO:0010647	positive regulation of cell communication	biological_process	0.63003	1	12	17460	56	76974	7	5
GO:0023056	positive regulation of signaling	biological_process	0.63003	1	12	17460	56	76974	7	5
GO:0006023	aminoglycan biosynthetic process	biological_process	0.63598	1	8	17460	37	76974	7	1
GO:0040007	growth	biological_process	0.65638	1	10	17460	47	76974	7	3
GO:0034457	Mpp10 complex	cellular_component	0.68355	1	8	17460	39	76974	7	1
GO:0003746	translation elongation factor activity	molecular_function	0.73531	1	17	17460	86	76974	7	10
GO:0030686	90S preribosome	cellular_component	0.76326	1	8	17460	42	76974	7	1
GO:0005732	small nucleolar ribonucleoprotein complex	cellular_component	0.78334	1	8	17460	43	76974	7	1
GO:0009236	cobalamin biosynthetic process	biological_process	0.79346	1	20	17460	102	76974	7	13
GO:0004499	N,N-dimethylaniline monooxygenase activity	molecular_function	0.79803	1	14	17460	72	76974	7	7
GO:0000096	sulfur amino acid metabolic process	biological_process	0.79926	1	13	17460	67	76974	7	6
GO:0006414	translational elongation	biological_process	0.81538	1	17	17460	91	76974	7	10
GO:0004523	RNA-DNA hybrid ribonuclease activity	molecular_function	0.82537	1	12	17460	64	76974	7	5
GO:0009289	pilus	cellular_component	0.82645	1	7	17460	39	76974	7	0
GO:0009235	cobalamin metabolic process	biological_process	0.83446	1	20	17460	105	76974	7	13
GO:0003860	3-hydroxyisobutyryl-CoA hydrolase activity	molecular_function	0.86666	1	15	17460	83	76974	7	8
GO:0016289	CoA hydrolase activity	molecular_function	0.86666	1	15	17460	83	76974	7	8
GO:0003909	DNA ligase activity	molecular_function	0.88412	1	13	17460	73	76974	7	6
GO:0044452	nucleolar part	cellular_component	0.89973	1	8	17460	52	76974	7	1
GO:0015743	malate transport	biological_process	0.90171	1	16	17460	92	76974	7	9
GO:0016814	hydrolase activity, acting on carbon-nitrogen (but not peptide) bonds, in cyclic amidines	molecular_function	0.90351	1	12	17460	71	76974	7	5
GO:0000778	condensed nuclear chromosome kinetochore	cellular_component	0.91096	1	22	17460	122	76974	7	15
GO:0000780	condensed nuclear chromosome, centromeric region	cellular_component	0.91096	1	22	17460	122	76974	7	15
GO:0000942	condensed nuclear chromosome outer kinetochore	cellular_component	0.91096	1	22	17460	122	76974	7	15
GO:0042729	DASH complex	cellular_component	0.91096	1	22	17460	122	76974	7	15
GO:0051235	maintenance of location	biological_process	0.9132	1	13	17460	77	76974	7	6
GO:0006771	riboflavin metabolic process	biological_process	0.91365	1	11	17460	67	76974	7	4
GO:0009231	riboflavin biosynthetic process	biological_process	0.91365	1	11	17460	67	76974	7	4
GO:0042726	flavin-containing compound metabolic process	biological_process	0.91365	1	11	17460	67	76974	7	4
GO:0042727	flavin-containing compound biosynthetic process	biological_process	0.91365	1	11	17460	67	76974	7	4
GO:0008083	growth factor activity	molecular_function	0.91623	1	11	17460	67	76974	7	4
GO:0006487	protein N-linked glycosylation	biological_process	0.95438	1	9	17460	61	76974	7	2
GO:0015740	C4-dicarboxylate transport	biological_process	0.96687	1	18	17460	116	76974	7	11
GO:0019048	modulation by virus of host morphology or physiology	biological_process	0.97196	1	13	17460	88	76974	7	6
GO:0009401	phosphoenolpyruvate-dependent sugar phosphotransferase system	biological_process	0.98286	1	10	17460	78	76974	7	3
GO:0070887	cellular response to chemical stimulus	biological_process	0.98728	1	13	17460	98	76974	7	6
GO:0005669	transcription factor TFIID complex	cellular_component	0.99005	1	9	17460	73	76974	7	2
GO:0006368	transcription elongation from RNA polymerase II promoter	biological_process	0.99208	1	13	17460	97	76974	7	6
GO:0017016	Ras GTPase binding	molecular_function	0.99212	1	14	17460	100	76974	7	7
GO:0031267	small GTPase binding	molecular_function	0.99212	1	14	17460	100	76974	7	7
GO:0051020	GTPase binding	molecular_function	0.99212	1	14	17460	100	76974	7	7
GO:0006354	DNA-templated transcription, elongation	biological_process	0.99479	1	13	17460	100	76974	7	6
GO:0000956	nuclear-transcribed mRNA catabolic process	biological_process	0.99651	1	12	17460	97	76974	7	5
GO:0016881	acid-amino acid ligase activity	molecular_function	0.99845	1	11	17460	94	76974	7	4
GO:0009733	response to auxin	biological_process	5.2811e-09	4.4286e-07	30	17460	53	76974	6	24
GO:0046685	response to arsenic-containing substance	biological_process	5.1241e-07	3.7172e-05	26	17460	45	76974	6	20
GO:0055076	transition metal ion homeostasis	biological_process	0.002072	0.055442	16	17460	36	76974	6	10
GO:0008883	glutamyl-tRNA reductase activity	molecular_function	0.0059725	0.12873	9	17460	17	76974	6	3
GO:0044179	hemolysis in other organism	biological_process	0.014066	0.25211	7	17460	13	76974	6	1
GO:0051715	cytolysis in other organism	biological_process	0.014066	0.25211	7	17460	13	76974	6	1
GO:0031640	killing of cells of other organism	biological_process	0.035093	0.48612	7	17460	15	76974	6	1
GO:0044364	disruption of cells of other organism	biological_process	0.035093	0.48612	7	17460	15	76974	6	1
GO:0031225	anchored component of membrane	cellular_component	0.036771	0.49762	10	17460	25	76974	6	4
GO:0003964	RNA-directed DNA polymerase activity	molecular_function	0.049392	0.59934	9	17460	22	76974	6	3
GO:0001906	cell killing	biological_process	0.050825	0.6022	7	17460	16	76974	6	1
GO:0044461	bacterial-type flagellum part	cellular_component	0.051248	0.6022	11	17460	30	76974	6	5
GO:0004506	squalene monooxygenase activity	molecular_function	0.07349	0.75558	18	17460	56	76974	6	12
GO:0098589	membrane region	cellular_component	0.078695	0.7732	13	17460	39	76974	6	7
GO:0006303	double-strand break repair via nonhomologous end joining	biological_process	0.088269	0.81597	11	17460	32	76974	6	5
GO:0044463	cell projection part	cellular_component	0.090634	0.82326	11	17460	33	76974	6	5
GO:0016778	diphosphotransferase activity	molecular_function	0.096385	0.8605	12	17460	36	76974	6	6
GO:0043281	regulation of cysteine-type endopeptidase activity involved in apoptotic process	biological_process	0.10607	0.91899	8	17460	22	76974	6	2
GO:2000116	regulation of cysteine-type endopeptidase activity	biological_process	0.10607	0.91899	8	17460	22	76974	6	2
GO:0000726	non-recombinational repair	biological_process	0.10697	0.92341	11	17460	33	76974	6	5
GO:0019835	cytolysis	biological_process	0.1481	1	7	17460	20	76974	6	1
GO:0005885	Arp2/3 protein complex	cellular_component	0.16607	1	11	17460	36	76974	6	5
GO:0004579	dolichyl-diphosphooligosaccharide-protein glycotransferase activity	molecular_function	0.1887	1	10	17460	33	76974	6	4
GO:0015018	galactosylgalactosylxylosylprotein 3-beta-glucuronosyltransferase activity	molecular_function	0.21748	1	6	17460	18	76974	6	0
GO:0015020	glucuronosyltransferase activity	molecular_function	0.21748	1	6	17460	18	76974	6	0
GO:0030838	positive regulation of actin filament polymerization	biological_process	0.21959	1	11	17460	38	76974	6	5
GO:0031334	positive regulation of protein complex assembly	biological_process	0.21959	1	11	17460	38	76974	6	5
GO:0032273	positive regulation of protein polymerization	biological_process	0.21959	1	11	17460	38	76974	6	5
GO:0034314	Arp2/3 complex-mediated actin nucleation	biological_process	0.21959	1	11	17460	38	76974	6	5
GO:0044089	positive regulation of cellular component biogenesis	biological_process	0.21959	1	11	17460	38	76974	6	5
GO:0045010	actin nucleation	biological_process	0.21959	1	11	17460	38	76974	6	5
GO:0051495	positive regulation of cytoskeleton organization	biological_process	0.21959	1	11	17460	38	76974	6	5
GO:0051861	glycolipid binding	molecular_function	0.22062	1	6	17460	19	76974	6	0
GO:0004556	alpha-amylase activity	molecular_function	0.22184	1	7	17460	22	76974	6	1
GO:0000372	Group I intron splicing	biological_process	0.2234	1	11	17460	37	76974	6	5
GO:0000376	RNA splicing, via transesterification reactions with guanosine as nucleophile	biological_process	0.2234	1	11	17460	37	76974	6	5
GO:0052547	regulation of peptidase activity	biological_process	0.22706	1	8	17460	26	76974	6	2
GO:0052548	regulation of endopeptidase activity	biological_process	0.22706	1	8	17460	26	76974	6	2
GO:0005375	copper ion transmembrane transporter activity	molecular_function	0.27805	1	6	17460	21	76974	6	0
GO:0035434	copper ion transmembrane transport	biological_process	0.27805	1	6	17460	21	76974	6	0
GO:0005337	nucleoside transmembrane transporter activity	molecular_function	0.31022	1	16	17460	62	76974	6	10
GO:0009636	response to toxic substance	biological_process	0.31729	1	11	17460	42	76974	6	5
GO:0002682	regulation of immune system process	biological_process	0.36855	1	15	17460	61	76974	6	9
GO:0030118	clathrin coat	cellular_component	0.38784	1	13	17460	51	76974	6	7
GO:0043085	positive regulation of catalytic activity	biological_process	0.39933	1	6	17460	22	76974	6	0
GO:0009341	beta-galactosidase complex	cellular_component	0.41026	1	23	17460	94	76974	6	17
GO:0070206	protein trimerization	biological_process	0.41734	1	20	17460	83	76974	6	14
GO:0019887	protein kinase regulator activity	molecular_function	0.43346	1	12	17460	50	76974	6	6
GO:0004576	oligosaccharyl transferase activity	molecular_function	0.44191	1	16	17460	67	76974	6	10
GO:0003873	6-phosphofructo-2-kinase activity	molecular_function	0.44484	1	17	17460	72	76974	6	11
GO:0006000	fructose metabolic process	biological_process	0.44484	1	17	17460	72	76974	6	11
GO:0016742	hydroxymethyl-, formyl- and related transferase activity	molecular_function	0.45755	1	10	17460	41	76974	6	4
GO:0004645	phosphorylase activity	molecular_function	0.45758	1	10	17460	40	76974	6	4
GO:0008184	glycogen phosphorylase activity	molecular_function	0.45758	1	10	17460	40	76974	6	4
GO:0051494	negative regulation of cytoskeleton organization	biological_process	0.50343	1	10	17460	43	76974	6	4
GO:0008417	fucosyltransferase activity	molecular_function	0.53148	1	9	17460	38	76974	6	3
GO:0009036	Type II site-specific deoxyribonuclease activity	molecular_function	0.53612	1	10	17460	44	76974	6	4
GO:0015666	restriction endodeoxyribonuclease activity	molecular_function	0.53612	1	10	17460	44	76974	6	4
GO:0000097	sulfur amino acid biosynthetic process	biological_process	0.53621	1	11	17460	47	76974	6	5
GO:0005801	cis-Golgi network	cellular_component	0.54782	1	18	17460	79	76974	6	12
GO:0043130	ubiquitin binding	molecular_function	0.562	1	10	17460	45	76974	6	4
GO:0004535	poly(A)-specific ribonuclease activity	molecular_function	0.5835	1	18	17460	82	76974	6	12
GO:0006825	copper ion transport	biological_process	0.5848	1	6	17460	29	76974	6	0
GO:0016670	oxidoreductase activity, acting on a sulfur group of donors, oxygen as acceptor	molecular_function	0.58789	1	8	17460	36	76974	6	2
GO:0030474	spindle pole body duplication	biological_process	0.61191	1	12	17460	54	76974	6	6
GO:0051300	spindle pole body organization	biological_process	0.61191	1	12	17460	54	76974	6	6
GO:0006558	L-phenylalanine metabolic process	biological_process	0.62629	1	7	17460	32	76974	6	1
GO:1902221	erythrose 4-phosphate/phosphoenolpyruvate family amino acid metabolic process	biological_process	0.62629	1	7	17460	32	76974	6	1
GO:0071310	cellular response to organic substance	biological_process	0.67317	1	11	17460	53	76974	6	5
GO:0016929	SUMO-specific protease activity	molecular_function	0.69805	1	8	17460	39	76974	6	2
GO:0032183	SUMO binding	molecular_function	0.69805	1	8	17460	39	76974	6	2
GO:0070122	isopeptidase activity	molecular_function	0.69805	1	8	17460	39	76974	6	2
GO:0070138	ubiquitin-like protein-specific isopeptidase activity	molecular_function	0.69805	1	8	17460	39	76974	6	2
GO:0070140	SUMO-specific isopeptidase activity	molecular_function	0.69805	1	8	17460	39	76974	6	2
GO:0008608	attachment of spindle microtubules to kinetochore	biological_process	0.76657	1	20	17460	100	76974	6	14
GO:0032507	maintenance of protein location in cell	biological_process	0.78972	1	12	17460	63	76974	6	6
GO:0045185	maintenance of protein location	biological_process	0.78972	1	12	17460	63	76974	6	6
GO:0051651	maintenance of location in cell	biological_process	0.78972	1	12	17460	63	76974	6	6
GO:0033644	host cell membrane	cellular_component	0.79132	1	9	17460	50	76974	6	3
GO:0044218	other organism cell membrane	cellular_component	0.79132	1	9	17460	50	76974	6	3
GO:0044279	other organism membrane	cellular_component	0.79132	1	9	17460	50	76974	6	3
GO:0016782	transferase activity, transferring sulfur-containing groups	molecular_function	0.80321	1	18	17460	95	76974	6	12
GO:0016776	phosphotransferase activity, phosphate group as acceptor	molecular_function	0.81382	1	12	17460	66	76974	6	6
GO:0019239	deaminase activity	molecular_function	0.81757	1	12	17460	64	76974	6	6
GO:0034453	microtubule anchoring	biological_process	0.83617	1	20	17460	105	76974	6	14
GO:0003954	NADH dehydrogenase activity	molecular_function	0.85463	1	14	17460	80	76974	6	8
GO:0000175	3'-5'-exoribonuclease activity	molecular_function	0.85649	1	18	17460	97	76974	6	12
GO:0004532	exoribonuclease activity	molecular_function	0.85649	1	18	17460	97	76974	6	12
GO:0016896	exoribonuclease activity, producing 5'-phosphomonoesters	molecular_function	0.85649	1	18	17460	97	76974	6	12
GO:0003910	DNA ligase (ATP) activity	molecular_function	0.87937	1	10	17460	57	76974	6	4
GO:0002097	tRNA wobble base modification	biological_process	0.90295	1	12	17460	70	76974	6	6
GO:0009306	protein secretion	biological_process	0.90509	1	15	17460	89	76974	6	9
GO:0045861	negative regulation of proteolysis	biological_process	0.90516	1	11	17460	66	76974	6	5
GO:0022843	voltage-gated cation channel activity	molecular_function	0.91158	1	8	17460	51	76974	6	2
GO:0019888	protein phosphatase regulator activity	molecular_function	0.91985	1	19	17460	107	76974	6	13
GO:0016857	racemase and epimerase activity, acting on carbohydrates and derivatives	molecular_function	0.92512	1	8	17460	52	76974	6	2
GO:0003006	developmental process involved in reproduction	biological_process	0.93837	1	14	17460	85	76974	6	8
GO:0019208	phosphatase regulator activity	molecular_function	0.96986	1	20	17460	122	76974	6	14
GO:0005643	nuclear pore	cellular_component	0.98216	1	15	17460	99	76974	6	9
GO:0051304	chromosome separation	biological_process	0.98497	1	9	17460	69	76974	6	3
GO:0005179	hormone activity	molecular_function	0.98584	1	14	17460	97	76974	6	8
GO:1902531	regulation of intracellular signal transduction	biological_process	0.98769	1	10	17460	76	76974	6	4
GO:0006816	calcium ion transport	biological_process	0.99062	1	8	17460	67	76974	6	2
GO:0007346	regulation of mitotic cell cycle	biological_process	0.99531	1	9	17460	77	76974	6	3
GO:0045017	glycerolipid biosynthetic process	biological_process	0.99886	1	27	17460	196	76974	6	21
GO:0000922	spindle pole	cellular_component	0.99984	1	8	17460	88	76974	6	2
GO:0005852	eukaryotic translation initiation factor 3 complex	cellular_component	0.99996	1	9	17460	105	76974	6	3
GO:0045300	acyl-[acyl-carrier-protein] desaturase activity	molecular_function	0.00043847	0.015023	13	17460	23	76974	5	8
GO:0009425	bacterial-type flagellum basal body	cellular_component	0.0012422	0.03707	8	17460	12	76974	5	3
GO:0009538	photosystem I reaction center	cellular_component	0.0017546	0.047905	16	17460	38	76974	5	11
GO:0006879	cellular iron ion homeostasis	biological_process	0.0032551	0.075299	13	17460	28	76974	5	8
GO:0046916	cellular transition metal ion homeostasis	biological_process	0.0032551	0.075299	13	17460	28	76974	5	8
GO:0055072	iron ion homeostasis	biological_process	0.0032551	0.075299	13	17460	28	76974	5	8
GO:0003879	ATP phosphoribosyltransferase activity	molecular_function	0.014062	0.25211	8	17460	16	76974	5	3
GO:0008199	ferric iron binding	molecular_function	0.041577	0.53001	14	17460	40	76974	5	9
GO:0071203	WASH complex	cellular_component	0.046927	0.5784	13	17460	36	76974	5	8
GO:0008649	rRNA methyltransferase activity	molecular_function	0.067508	0.72348	12	17460	34	76974	5	7
GO:0000795	synaptonemal complex	cellular_component	0.072623	0.75285	6	17460	14	76974	5	1
GO:0006432	phenylalanyl-tRNA aminoacylation	biological_process	0.099738	0.87867	7	17460	18	76974	5	2
GO:0006282	regulation of DNA repair	biological_process	0.11262	0.95884	8	17460	22	76974	5	3
GO:0080135	regulation of cellular response to stress	biological_process	0.11262	0.95884	8	17460	22	76974	5	3
GO:2001020	regulation of response to DNA damage stimulus	biological_process	0.11262	0.95884	8	17460	22	76974	5	3
GO:0051346	negative regulation of hydrolase activity	biological_process	0.1425	1	12	17460	40	76974	5	7
GO:0007128	meiotic prophase I	biological_process	0.1461	1	5	17460	13	76974	5	0
GO:0051324	prophase	biological_process	0.1461	1	5	17460	13	76974	5	0
GO:0098762	meiotic cell cycle phase	biological_process	0.1461	1	5	17460	13	76974	5	0
GO:0098764	meiosis I cell cycle phase	biological_process	0.1461	1	5	17460	13	76974	5	0
GO:0007007	inner mitochondrial membrane organization	biological_process	0.18252	1	10	17460	32	76974	5	5
GO:0042407	cristae formation	biological_process	0.18252	1	10	17460	32	76974	5	5
GO:0061617	MICOS complex	cellular_component	0.18252	1	10	17460	32	76974	5	5
GO:0016780	phosphotransferase activity, for other substituted phosphate groups	molecular_function	0.19049	1	12	17460	41	76974	5	7
GO:0017053	transcriptional repressor complex	cellular_component	0.19251	1	5	17460	14	76974	5	0
GO:0009620	response to fungus	biological_process	0.19749	1	6	17460	19	76974	5	1
GO:0050832	defense response to fungus	biological_process	0.19749	1	6	17460	19	76974	5	1
GO:0051090	regulation of sequence-specific DNA binding transcription factor activity	biological_process	0.20727	1	9	17460	29	76974	5	4
GO:0031304	intrinsic component of mitochondrial inner membrane	cellular_component	0.20958	1	10	17460	33	76974	5	5
GO:0031305	integral component of mitochondrial inner membrane	cellular_component	0.20958	1	10	17460	33	76974	5	5
GO:0032592	integral component of mitochondrial membrane	cellular_component	0.20958	1	10	17460	33	76974	5	5
GO:0098573	intrinsic component of mitochondrial membrane	cellular_component	0.20958	1	10	17460	33	76974	5	5
GO:0051345	positive regulation of hydrolase activity	biological_process	0.20971	1	5	17460	14	76974	5	0
GO:0030058	amine dehydrogenase activity	molecular_function	0.21204	1	6	17460	18	76974	5	1
GO:0000279	M phase	biological_process	0.22495	1	5	17460	15	76974	5	0
GO:0022403	cell cycle phase	biological_process	0.22495	1	5	17460	15	76974	5	0
GO:0044848	biological phase	biological_process	0.22495	1	5	17460	15	76974	5	0
GO:0006568	tryptophan metabolic process	biological_process	0.24987	1	9	17460	31	76974	5	4
GO:0006586	indolalkylamine metabolic process	biological_process	0.24987	1	9	17460	31	76974	5	4
GO:0042430	indole-containing compound metabolic process	biological_process	0.24987	1	9	17460	31	76974	5	4
GO:0050664	oxidoreductase activity, acting on NAD(P)H, oxygen as acceptor	molecular_function	0.25276	1	5	17460	15	76974	5	0
GO:0071941	nitrogen cycle metabolic process	biological_process	0.25843	1	12	17460	44	76974	5	7
GO:0017089	glycolipid transporter activity	molecular_function	0.30175	1	5	17460	17	76974	5	0
GO:0046836	glycolipid transport	biological_process	0.30175	1	5	17460	17	76974	5	0
GO:0004017	adenylate kinase activity	molecular_function	0.31185	1	10	17460	37	76974	5	5
GO:0032947	protein complex scaffold	molecular_function	0.31458	1	7	17460	24	76974	5	2
GO:0008107	galactoside 2-alpha-L-fucosyltransferase activity	molecular_function	0.31778	1	8	17460	28	76974	5	3
GO:0031127	alpha-(1,2)-fucosyltransferase activity	molecular_function	0.31778	1	8	17460	28	76974	5	3
GO:0000077	DNA damage checkpoint	biological_process	0.32595	1	10	17460	37	76974	5	5
GO:0031570	DNA integrity checkpoint	biological_process	0.32595	1	10	17460	37	76974	5	5
GO:0031503	protein complex localization	biological_process	0.33275	1	6	17460	21	76974	5	1
GO:0034629	cellular protein complex localization	biological_process	0.33275	1	6	17460	21	76974	5	1
GO:0003917	DNA topoisomerase type I activity	molecular_function	0.34266	1	9	17460	33	76974	5	4
GO:0016855	racemase and epimerase activity, acting on amino acids and derivatives	molecular_function	0.36305	1	11	17460	42	76974	5	6
GO:0036361	racemase activity, acting on amino acids and derivatives	molecular_function	0.36305	1	11	17460	42	76974	5	6
GO:0048511	rhythmic process	biological_process	0.37435	1	9	17460	35	76974	5	4
GO:0010942	positive regulation of cell death	biological_process	0.42662	1	8	17460	31	76974	5	3
GO:0043065	positive regulation of apoptotic process	biological_process	0.42662	1	8	17460	31	76974	5	3
GO:0043068	positive regulation of programmed cell death	biological_process	0.42662	1	8	17460	31	76974	5	3
GO:0004526	ribonuclease P activity	molecular_function	0.45013	1	7	17460	29	76974	5	2
GO:0016972	thiol oxidase activity	molecular_function	0.45185	1	7	17460	28	76974	5	2
GO:0004733	pyridoxamine-phosphate oxidase activity	molecular_function	0.45609	1	6	17460	25	76974	5	1
GO:0019904	protein domain specific binding	molecular_function	0.47807	1	7	17460	28	76974	5	2
GO:1901264	carbohydrate derivative transport	biological_process	0.48863	1	6	17460	25	76974	5	1
GO:0070851	growth factor receptor binding	molecular_function	0.49452	1	9	17460	37	76974	5	4
GO:0006220	pyrimidine nucleotide metabolic process	biological_process	0.54688	1	13	17460	59	76974	5	8
GO:0006221	pyrimidine nucleotide biosynthetic process	biological_process	0.54688	1	13	17460	59	76974	5	8
GO:0009070	serine family amino acid biosynthetic process	biological_process	0.5479	1	5	17460	21	76974	5	0
GO:0034702	ion channel complex	cellular_component	0.64085	1	5	17460	24	76974	5	0
GO:0034703	cation channel complex	cellular_component	0.64085	1	5	17460	24	76974	5	0
GO:0004097	catechol oxidase activity	molecular_function	0.64166	1	5	17460	24	76974	5	0
GO:0031399	regulation of protein modification process	biological_process	0.66727	1	24	17460	114	76974	5	19
GO:0004549	tRNA-specific ribonuclease activity	molecular_function	0.7005	1	7	17460	36	76974	5	2
GO:0050792	regulation of viral process	biological_process	0.73868	1	9	17460	45	76974	5	4
GO:0043903	regulation of symbiosis, encompassing mutualism through parasitism	biological_process	0.78645	1	9	17460	47	76974	5	4
GO:0019238	cyclohydrolase activity	molecular_function	0.78808	1	7	17460	38	76974	5	2
GO:0016832	aldehyde-lyase activity	molecular_function	0.78979	1	18	17460	93	76974	5	13
GO:0008250	oligosaccharyltransferase complex	cellular_component	0.79112	1	6	17460	33	76974	5	1
GO:0004345	glucose-6-phosphate dehydrogenase activity	molecular_function	0.81212	1	8	17460	43	76974	5	3
GO:0001522	pseudouridine synthesis	biological_process	0.81983	1	16	17460	85	76974	5	11
GO:0002098	tRNA wobble uridine modification	biological_process	0.84547	1	9	17460	50	76974	5	4
GO:0008137	NADH dehydrogenase (ubiquinone) activity	molecular_function	0.86984	1	13	17460	76	76974	5	8
GO:0050136	NADH dehydrogenase (quinone) activity	molecular_function	0.86984	1	13	17460	76	76974	5	8
GO:0043112	receptor metabolic process	biological_process	0.87579	1	6	17460	39	76974	5	1
GO:0009069	serine family amino acid metabolic process	biological_process	0.88961	1	12	17460	68	76974	5	7
GO:0000288	nuclear-transcribed mRNA catabolic process, deadenylation-dependent decay	biological_process	0.90528	1	8	17460	51	76974	5	3
GO:0051539	4 iron, 4 sulfur cluster binding	molecular_function	0.91386	1	12	17460	71	76974	5	7
GO:0003950	NAD+ ADP-ribosyltransferase activity	molecular_function	0.91982	1	11	17460	66	76974	5	6
GO:0032786	positive regulation of DNA-templated transcription, elongation	biological_process	0.92711	1	7	17460	46	76974	5	2
GO:0032968	positive regulation of transcription elongation from RNA polymerase II promoter	biological_process	0.92711	1	7	17460	46	76974	5	2
GO:0034243	regulation of transcription elongation from RNA polymerase II promoter	biological_process	0.92711	1	7	17460	46	76974	5	2
GO:0006213	pyrimidine nucleoside metabolic process	biological_process	0.92981	1	7	17460	48	76974	5	2
GO:0032784	regulation of DNA-templated transcription, elongation	biological_process	0.95259	1	7	17460	49	76974	5	2
GO:0016755	transferase activity, transferring amino-acyl groups	molecular_function	0.95415	1	9	17460	61	76974	5	4
GO:0045944	positive regulation of transcription from RNA polymerase II promoter	biological_process	0.9591	1	7	17460	50	76974	5	2
GO:0005798	Golgi-associated vesicle	cellular_component	0.96161	1	10	17460	67	76974	5	5
GO:0030660	Golgi-associated vesicle membrane	cellular_component	0.96161	1	10	17460	67	76974	5	5
GO:0009452	7-methylguanosine RNA capping	biological_process	0.96337	1	15	17460	94	76974	5	10
GO:0036260	RNA capping	biological_process	0.96337	1	15	17460	94	76974	5	10
GO:0010948	negative regulation of cell cycle process	biological_process	0.97506	1	9	17460	66	76974	5	4
GO:0051049	regulation of transport	biological_process	0.99684	1	7	17460	69	76974	5	2
GO:0019068	virion assembly	biological_process	0.99741	1	15	17460	116	76974	5	10
GO:0030119	AP-type membrane coat adaptor complex	cellular_component	0.99966	1	12	17460	120	76974	5	7
GO:0031109	microtubule polymerization or depolymerization	biological_process	0.99996	1	5	17460	74	76974	5	0
GO:0046474	glycerophospholipid biosynthetic process	biological_process	1	1	16	17460	175	76974	5	11
GO:0010109	regulation of photosynthesis	biological_process	0.011525	0.21735	13	17460	31	76974	4	9
GO:0042548	regulation of photosynthesis, light reaction	biological_process	0.011525	0.21735	13	17460	31	76974	4	9
GO:0042549	photosystem II stabilization	biological_process	0.011525	0.21735	13	17460	31	76974	4	9
GO:0043467	regulation of generation of precursor metabolites and energy	biological_process	0.011525	0.21735	13	17460	31	76974	4	9
GO:0006278	RNA-dependent DNA replication	biological_process	0.013496	0.24565	6	17460	10	76974	4	2
GO:0019321	pentose metabolic process	biological_process	0.019227	0.30821	12	17460	29	76974	4	8
GO:0019566	arabinose metabolic process	biological_process	0.019227	0.30821	12	17460	29	76974	4	8
GO:0046373	L-arabinose metabolic process	biological_process	0.019227	0.30821	12	17460	29	76974	4	8
GO:0033743	peptide-methionine (R)-S-oxide reductase activity	molecular_function	0.037933	0.50895	6	17460	13	76974	4	2
GO:0034219	carbohydrate transmembrane transport	biological_process	0.046519	0.57488	5	17460	10	76974	4	1
GO:0046556	alpha-L-arabinofuranosidase activity	molecular_function	0.052464	0.61286	12	17460	33	76974	4	8
GO:0004399	histidinol dehydrogenase activity	molecular_function	0.066169	0.71664	8	17460	20	76974	4	4
GO:0043189	H4/H2A histone acetyltransferase complex	cellular_component	0.079769	0.7732	4	17460	8	76974	4	0
GO:1902562	H4 histone acetyltransferase complex	cellular_component	0.079769	0.7732	4	17460	8	76974	4	0
GO:0048585	negative regulation of response to stimulus	biological_process	0.087354	0.81019	7	17460	18	76974	4	3
GO:0016093	polyprenol metabolic process	biological_process	0.096831	0.86121	5	17460	12	76974	4	1
GO:0019348	dolichol metabolic process	biological_process	0.096831	0.86121	5	17460	12	76974	4	1
GO:0000062	fatty-acyl-CoA binding	molecular_function	0.11977	0.99084	10	17460	31	76974	4	6
GO:0070176	DRM complex	cellular_component	0.12054	0.99084	4	17460	9	76974	4	0
GO:0090568	nuclear transcriptional repressor complex	cellular_component	0.12054	0.99084	4	17460	9	76974	4	0
GO:0090571	RNA polymerase II transcription repressor complex	cellular_component	0.12054	0.99084	4	17460	9	76974	4	0
GO:0008097	5S rRNA binding	molecular_function	0.13326	1	6	17460	17	76974	4	2
GO:0043230	extracellular organelle	cellular_component	0.13502	1	4	17460	9	76974	4	0
GO:0006515	misfolded or incompletely synthesized protein catabolic process	biological_process	0.15194	1	5	17460	13	76974	4	1
GO:0031144	proteasome localization	biological_process	0.15194	1	5	17460	13	76974	4	1
GO:0035966	response to topologically incorrect protein	biological_process	0.15194	1	5	17460	13	76974	4	1
GO:0035967	cellular response to topologically incorrect protein	biological_process	0.15194	1	5	17460	13	76974	4	1
GO:0051788	response to misfolded protein	biological_process	0.15194	1	5	17460	13	76974	4	1
GO:0071218	cellular response to misfolded protein	biological_process	0.15194	1	5	17460	13	76974	4	1
GO:0071630	nucleus-associated proteasomal ubiquitin-dependent protein catabolic process	biological_process	0.15194	1	5	17460	13	76974	4	1
GO:0050776	regulation of immune response	biological_process	0.15413	1	11	17460	36	76974	4	7
GO:0009832	plant-type cell wall biogenesis	biological_process	0.15778	1	5	17460	13	76974	4	1
GO:0010215	cellulose microfibril organization	biological_process	0.15778	1	5	17460	13	76974	4	1
GO:0030198	extracellular matrix organization	biological_process	0.15778	1	5	17460	13	76974	4	1
GO:0043062	extracellular structure organization	biological_process	0.15778	1	5	17460	13	76974	4	1
GO:0070726	cell wall assembly	biological_process	0.15778	1	5	17460	13	76974	4	1
GO:0071668	plant-type cell wall assembly	biological_process	0.15778	1	5	17460	13	76974	4	1
GO:0016799	hydrolase activity, hydrolyzing N-glycosyl compounds	molecular_function	0.15944	1	14	17460	47	76974	4	10
GO:0045121	membrane raft	cellular_component	0.17	1	7	17460	21	76974	4	3
GO:0006948	induction by virus of host cell-cell fusion	biological_process	0.17111	1	5	17460	14	76974	4	1
GO:0022624	proteasome accessory complex	cellular_component	0.20267	1	7	17460	22	76974	4	3
GO:0009292	genetic transfer	biological_process	0.23639	1	5	17460	15	76974	4	1
GO:0008686	3,4-dihydroxy-2-butanone-4-phosphate synthase activity	molecular_function	0.25427	1	5	17460	15	76974	4	1
GO:0004779	sulfate adenylyltransferase activity	molecular_function	0.30068	1	5	17460	16	76974	4	1
GO:0004781	sulfate adenylyltransferase (ATP) activity	molecular_function	0.30068	1	5	17460	16	76974	4	1
GO:0007029	endoplasmic reticulum organization	biological_process	0.33724	1	14	17460	54	76974	4	10
GO:0004806	triglyceride lipase activity	molecular_function	0.33839	1	8	17460	29	76974	4	4
GO:0004411	homogentisate 1,2-dioxygenase activity	molecular_function	0.34958	1	4	17460	13	76974	4	0
GO:0006559	L-phenylalanine catabolic process	biological_process	0.34958	1	4	17460	13	76974	4	0
GO:1902222	erythrose 4-phosphate/phosphoenolpyruvate family amino acid catabolic process	biological_process	0.34958	1	4	17460	13	76974	4	0
GO:0019054	modulation by virus of host process	biological_process	0.35109	1	5	17460	18	76974	4	1
GO:0044068	modulation by symbiont of host cellular process	biological_process	0.35109	1	5	17460	18	76974	4	1
GO:0030269	tetrahydromethanopterin S-methyltransferase activity	molecular_function	0.37564	1	7	17460	27	76974	4	3
GO:0042086	5-methyl-5,6,7,8-tetrahydromethanopterin-dependent methyltransferase activity	molecular_function	0.37564	1	7	17460	27	76974	4	3
GO:0007267	cell-cell signaling	biological_process	0.38186	1	7	17460	26	76974	4	3
GO:0046933	proton-transporting ATP synthase activity, rotational mechanism	molecular_function	0.39157	1	10	17460	40	76974	4	6
GO:0017004	cytochrome complex assembly	biological_process	0.40094	1	13	17460	53	76974	4	9
GO:0009986	cell surface	cellular_component	0.40148	1	10	17460	39	76974	4	6
GO:0030145	manganese ion binding	molecular_function	0.4035	1	10	17460	40	76974	4	6
GO:0006665	sphingolipid metabolic process	biological_process	0.41417	1	4	17460	15	76974	4	0
GO:0006672	ceramide metabolic process	biological_process	0.41417	1	4	17460	15	76974	4	0
GO:0007268	synaptic transmission	biological_process	0.43157	1	6	17460	23	76974	4	2
GO:0030042	actin filament depolymerization	biological_process	0.4408	1	7	17460	28	76974	4	3
GO:0030834	regulation of actin filament depolymerization	biological_process	0.4408	1	7	17460	28	76974	4	3
GO:0030835	negative regulation of actin filament depolymerization	biological_process	0.4408	1	7	17460	28	76974	4	3
GO:0030837	negative regulation of actin filament polymerization	biological_process	0.4408	1	7	17460	28	76974	4	3
GO:0031333	negative regulation of protein complex assembly	biological_process	0.4408	1	7	17460	28	76974	4	3
GO:0032272	negative regulation of protein polymerization	biological_process	0.4408	1	7	17460	28	76974	4	3
GO:0051261	protein depolymerization	biological_process	0.4408	1	7	17460	28	76974	4	3
GO:0051693	actin filament capping	biological_process	0.4408	1	7	17460	28	76974	4	3
GO:1901879	regulation of protein depolymerization	biological_process	0.4408	1	7	17460	28	76974	4	3
GO:1901880	negative regulation of protein depolymerization	biological_process	0.4408	1	7	17460	28	76974	4	3
GO:0004659	prenyltransferase activity	molecular_function	0.44714	1	14	17460	57	76974	4	10
GO:0003713	transcription coactivator activity	molecular_function	0.46475	1	9	17460	38	76974	4	5
GO:0060429	epithelium development	biological_process	0.47797	1	7	17460	29	76974	4	3
GO:0043242	negative regulation of protein complex disassembly	biological_process	0.48266	1	7	17460	29	76974	4	3
GO:0008837	diaminopimelate epimerase activity	molecular_function	0.49128	1	8	17460	33	76974	4	4
GO:0047661	amino-acid racemase activity	molecular_function	0.49128	1	8	17460	33	76974	4	4
GO:0004356	glutamate-ammonia ligase activity	molecular_function	0.54607	1	13	17460	57	76974	4	9
GO:0007283	spermatogenesis	biological_process	0.54754	1	8	17460	35	76974	4	4
[truncated: 1,846 more rows]
