# Supplementary material for: <span aria-describedby="tippy-17">Transcriptomic and Metabolomic Profiling Provides Insights into Flavonoids Biosynthesis and Flower Coloring in <em>Loropetalum chinense</em> and <em>Loropetalum chinense</em> var. <em>rubrum</em>
Source: Preprints.org preprint supplement (doi:10.20944/preprints202304.0456.v1), 2023-04-18
Supplement: Supplementary file 18 [file supplementary table S24.xlsx]

## Sheet: Table S24  
	Supplementary table S24 The GO enrichment analysis of DETs between XNNC VS XNXY group
GO_accession	Description	Term_type	Over_represented_pValue	Corrected_pValue	DEG_item	DEG_list	Bg_item	Bg_list	up	Down
GO:0005488	binding	molecular_function	8.71e-09	1.05e-06	10798	17754	45204	76974	5928	0
GO:0008152	metabolic process	biological_process	3.25e-09	4.63e-07	9104	17754	38138	76974	4943	0
GO:0003824	catalytic activity	molecular_function	7.32e-13	4.3e-10	8987	17754	37140	76974	4936	0
GO:0009987	cellular process	biological_process	0.00047	0.021406	8391	17754	35601	76974	4658	0
GO:0071704	organic substance metabolic process	biological_process	1.43e-08	1.56e-06	7225	17754	30055	76974	3991	0
GO:0044238	primary metabolic process	biological_process	1.45e-06	0.00011	6924	17754	28867	76974	3832	0
GO:0044699	single-organism process	biological_process	0.085051	0.70815	6270	17754	26880	76974	3497	0
GO:0044237	cellular metabolic process	biological_process	1.8e-06	0.000134	6240	17754	25988	76974	3442	0
GO:0097159	organic cyclic compound binding	molecular_function	2.11e-08	2.16e-06	6114	17754	25105	76974	3338	0
GO:1901363	heterocyclic compound binding	molecular_function	2.11e-08	2.16e-06	6114	17754	25105	76974	3338	0
GO:0043167	ion binding	molecular_function	2.97e-19	1.4e-15	5982	17754	23628	76974	3253	0
GO:0043170	macromolecule metabolic process	biological_process	0.006314	0.149	5274	17754	22305	76974	2960	0
GO:0044260	cellular macromolecule metabolic process	biological_process	0.007525	0.16988	4749	17754	20056	76974	2693	0
GO:0005515	protein binding	molecular_function	0.000245	0.012103	4566	17754	18804	76974	2539	0
GO:0044763	single-organism cellular process	biological_process	0.031583	0.41779	4426	17754	18770	76974	2466	0
GO:0036094	small molecule binding	molecular_function	8.51e-15	1.33e-11	3954	17754	15382	76974	2175	0
GO:0000166	nucleotide binding	molecular_function	1.53e-14	1.43e-11	3870	17754	15049	76974	2126	0
GO:1901265	nucleoside phosphate binding	molecular_function	1.53e-14	1.43e-11	3870	17754	15049	76974	2126	0
GO:0016740	transferase activity	molecular_function	1.29e-08	1.45e-06	3638	17754	14628	76974	2097	0
GO:0043168	anion binding	molecular_function	5.38e-13	3.61e-10	3795	17754	14833	76974	2059	0
GO:0006807	nitrogen compound metabolic process	biological_process	0.48154	1	3597	17754	15693	76974	1927	0
GO:0044710	single-organism metabolic process	biological_process	0.014726	0.24609	3495	17754	14730	76974	1886	0
GO:0097367	carbohydrate derivative binding	molecular_function	1.25e-09	1.9e-07	3349	17754	13219	76974	1845	0
GO:0017076	purine nucleotide binding	molecular_function	2.66e-10	8.33e-08	3335	17754	13106	76974	1831	0
GO:0032553	ribonucleotide binding	molecular_function	1.02e-09	1.72e-07	3322	17754	13096	76974	1826	0
GO:0032555	purine ribonucleotide binding	molecular_function	6.75e-10	1.59e-07	3302	17754	12997	76974	1813	0
GO:0001883	purine nucleoside binding	molecular_function	7.46e-10	1.59e-07	3300	17754	12992	76974	1812	0
GO:0032549	ribonucleoside binding	molecular_function	7.46e-10	1.59e-07	3300	17754	12992	76974	1812	0
GO:0032550	purine ribonucleoside binding	molecular_function	7.46e-10	1.59e-07	3300	17754	12992	76974	1812	0
GO:0001882	nucleoside binding	molecular_function	8.4e-10	1.69e-07	3300	17754	12996	76974	1812	0
GO:0016020	membrane	cellular_component	0.99972	1	3208	17754	14698	76974	1811	0
GO:0034641	cellular nitrogen compound metabolic process	biological_process	0.64568	1	3321	17754	14584	76974	1770	0
GO:0009058	biosynthetic process	biological_process	0.14643	0.93684	3190	17754	13737	76974	1740	0
GO:0030554	adenyl nucleotide binding	molecular_function	1.17e-12	6.09e-10	3154	17754	12188	76974	1730	0
GO:0035639	purine ribonucleoside triphosphate binding	molecular_function	2.19e-06	0.000158	3066	17754	12238	76974	1729	0
GO:0019538	protein metabolic process	biological_process	4.01e-08	3.84e-06	3092	17754	12439	76974	1722	0
GO:0032559	adenyl ribonucleotide binding	molecular_function	3.9e-12	1.66e-09	3129	17754	12116	76974	1718	0
GO:1901360	organic cyclic compound metabolic process	biological_process	0.40964	1	3077	17754	13346	76974	1692	0
GO:0005623	cell	cellular_component	0.9978	1	2947	17754	13510	76974	1645	0
GO:0044464	cell part	cellular_component	0.9978	1	2947	17754	13510	76974	1645	0
GO:0016787	hydrolase activity	molecular_function	0.11794	0.85468	3039	17754	12931	76974	1638	0
GO:1901576	organic substance biosynthetic process	biological_process	0.35323	1	2995	17754	13027	76974	1636	0
GO:0005524	ATP binding	molecular_function	3.56e-09	4.92e-07	2886	17754	11323	76974	1630	0
GO:0006725	cellular aromatic compound metabolic process	biological_process	0.67601	1	2940	17754	12874	76974	1607	0
GO:0046483	heterocycle metabolic process	biological_process	0.72358	1	2925	17754	12836	76974	1591	0
GO:0044249	cellular biosynthetic process	biological_process	0.53128	1	2851	17754	12484	76974	1548	0
GO:0005622	intracellular	cellular_component	0.98551	1	2726	17754	12395	76974	1517	0
GO:0006139	nucleobase-containing compound metabolic process	biological_process	0.77777	1	2711	17754	11932	76974	1469	0
GO:0044424	intracellular part	cellular_component	0.98874	1	2629	17754	11984	76974	1463	0
GO:0044267	cellular protein metabolic process	biological_process	8.93e-07	6.88e-05	2534	17754	10134	76974	1438	0
GO:0003676	nucleic acid binding	molecular_function	0.89288	1	2443	17754	10810	76974	1377	0
GO:0051179	localization	biological_process	0.99795	1	2295	17754	10461	76974	1336	0
GO:0043169	cation binding	molecular_function	2.68e-07	2.33e-05	2415	17754	9614	76974	1330	0
GO:0046872	metal ion binding	molecular_function	6.93e-07	5.43e-05	2384	17754	9505	76974	1312	0
GO:0090304	nucleic acid metabolic process	biological_process	0.87825	1	2393	17754	10608	76974	1308	0
GO:0051234	establishment of localization	biological_process	0.99921	1	2225	17754	10203	76974	1298	0
GO:0016772	transferase activity, transferring phosphorus-containing groups	molecular_function	6.5e-06	0.000447	2179	17754	8634	76974	1297	0
GO:0006810	transport	biological_process	0.99923	1	2215	17754	10160	76974	1293	0
GO:0065007	biological regulation	biological_process	0.040023	0.47904	2267	17754	9595	76974	1275	0
GO:0050789	regulation of biological process	biological_process	0.007848	0.1755	2193	17754	9149	76974	1243	0
GO:0043412	macromolecule modification	biological_process	1.12e-05	0.000719	1999	17754	7909	76974	1217	0
GO:0010467	gene expression	biological_process	0.80509	1	2235	17754	9927	76974	1204	0
GO:0050794	regulation of cellular process	biological_process	0.003556	0.099969	2123	17754	8795	76974	1203	0
GO:0043226	organelle	cellular_component	0.90796	1	2073	17754	9327	76974	1195	0
GO:0043229	intracellular organelle	cellular_component	0.96158	1	2022	17754	9177	76974	1162	0
GO:0009059	macromolecule biosynthetic process	biological_process	0.95506	1	2098	17754	9486	76974	1154	0
GO:0034645	cellular macromolecule biosynthetic process	biological_process	0.96474	1	2071	17754	9387	76974	1143	0
GO:0006464	cellular protein modification process	biological_process	4.54e-09	5.92e-07	1832	17754	7035	76974	1124	708
GO:0036211	protein modification process	biological_process	4.54e-09	5.92e-07	1832	17754	7035	76974	1124	708
GO:0006796	phosphate-containing compound metabolic process	biological_process	9.6e-10	1.72e-07	1855	17754	7094	76974	1114	741
GO:0006793	phosphorus metabolic process	biological_process	1.03e-09	1.72e-07	1855	17754	7096	76974	1114	741
GO:0044271	cellular nitrogen compound biosynthetic process	biological_process	0.80038	1	2038	17754	9067	76974	1100	938
GO:0016301	kinase activity	molecular_function	1.29e-08	1.45e-06	1759	17754	6739	76974	1066	693
GO:0044425	membrane part	cellular_component	1	1	1914	17754	9233	76974	1058	856
GO:0016070	RNA metabolic process	biological_process	0.66018	1	1861	17754	8141	76974	1040	821
GO:1901362	organic cyclic compound biosynthetic process	biological_process	0.22303	1	1760	17754	7560	76974	1028	732
GO:0016773	phosphotransferase activity, alcohol group as acceptor	molecular_function	5.03e-08	4.72e-06	1643	17754	6303	76974	992	651
GO:1902578	single-organism localization	biological_process	0.99008	1	1663	17754	7563	76974	982	681
GO:0044765	single-organism transport	biological_process	0.98934	1	1641	17754	7461	76974	972	669
GO:0043231	intracellular membrane-bounded organelle	cellular_component	0.93121	1	1611	17754	7263	76974	953	658
GO:0043227	membrane-bounded organelle	cellular_component	0.93463	1	1611	17754	7267	76974	953	658
GO:0055114	oxidation-reduction process	biological_process	0.01641	0.26122	1734	17754	7221	76974	939	795
GO:0019438	aromatic compound biosynthetic process	biological_process	0.5394	1	1602	17754	6998	76974	933	669
GO:0018130	heterocycle biosynthetic process	biological_process	0.60535	1	1611	17754	7062	76974	932	679
GO:0050896	response to stimulus	biological_process	0.00053	0.023709	1653	17754	6765	76974	931	722
GO:0016310	phosphorylation	biological_process	6.76e-10	1.59e-07	1469	17754	5495	76974	899	570
GO:0016491	oxidoreductase activity	molecular_function	0.004279	0.11353	1669	17754	6885	76974	893	776
GO:0004672	protein kinase activity	molecular_function	6.59e-08	5.96e-06	1442	17754	5485	76974	891	551
GO:0032991	macromolecular complex	cellular_component	0.9994	1	1570	17754	7430	76974	872	698
GO:0006468	protein phosphorylation	biological_process	3.4e-10	9.97e-08	1377	17754	5102	76974	856	521
GO:0031224	intrinsic component of membrane	cellular_component	0.99887	1	1495	17754	7019	76974	837	658
GO:0016021	integral component of membrane	cellular_component	0.99906	1	1487	17754	6991	76974	831	656
GO:0034654	nucleobase-containing compound biosynthetic process	biological_process	0.51313	1	1424	17754	6217	76974	824	600
GO:0003677	DNA binding	molecular_function	0.61795	1	1417	17754	6205	76974	818	599
GO:0046914	transition metal ion binding	molecular_function	0.023344	0.33242	1470	17754	6057	76974	797	673
GO:0032774	RNA biosynthetic process	biological_process	0.36018	1	1282	17754	5539	76974	753	529
GO:0006351	transcription, DNA-templated	biological_process	0.43927	1	1254	17754	5446	76974	742	512
GO:0097659	nucleic acid-templated transcription	biological_process	0.43927	1	1254	17754	5446	76974	742	512
GO:0019222	regulation of metabolic process	biological_process	0.035805	0.44294	1271	17754	5278	76974	719	552
GO:0043234	protein complex	cellular_component	0.99999	1	1233	17754	5977	76974	713	520
GO:0005634	nucleus	cellular_component	0.47558	1	1149	17754	4996	76974	698	451
GO:0031323	regulation of cellular metabolic process	biological_process	0.023449	0.33267	1211	17754	4990	76974	683	528
GO:1901564	organonitrogen compound metabolic process	biological_process	0.21565	1	1349	17754	5813	76974	683	666
GO:0060255	regulation of macromolecule metabolic process	biological_process	0.042628	0.49399	1195	17754	4965	76974	679	516
GO:0080090	regulation of primary metabolic process	biological_process	0.029398	0.39557	1167	17754	4816	76974	663	504
GO:0010468	regulation of gene expression	biological_process	0.071917	0.64946	1147	17754	4792	76974	656	491
GO:0005215	transporter activity	molecular_function	0.99735	1	1115	17754	5219	76974	656	459
GO:0051716	cellular response to stimulus	biological_process	0.078662	0.68281	1157	17754	4862	76974	653	504
GO:0051171	regulation of nitrogen compound metabolic process	biological_process	0.033331	0.43721	1124	17754	4640	76974	641	483
GO:0010556	regulation of macromolecule biosynthetic process	biological_process	0.042211	0.49399	1116	17754	4619	76974	638	478
GO:0031326	regulation of cellular biosynthetic process	biological_process	0.042211	0.49399	1116	17754	4619	76974	638	478
GO:0009889	regulation of biosynthetic process	biological_process	0.043781	0.49902	1116	17754	4621	76974	638	478
GO:2000112	regulation of cellular macromolecule biosynthetic process	biological_process	0.069537	0.63161	1100	17754	4581	76974	636	464
GO:0005737	cytoplasm	cellular_component	0.99641	1	1203	17754	5704	76974	636	567
GO:0019219	regulation of nucleobase-containing compound metabolic process	biological_process	0.002928	0.089284	1063	17754	4282	76974	620	443
GO:0051252	regulation of RNA metabolic process	biological_process	0.004374	0.11412	1051	17754	4247	76974	615	436
GO:2001141	regulation of RNA biosynthetic process	biological_process	0.004374	0.11412	1051	17754	4247	76974	615	436
GO:0006355	regulation of transcription, DNA-templated	biological_process	0.008874	0.18439	1035	17754	4209	76974	613	422
GO:1903506	regulation of nucleic acid-templated transcription	biological_process	0.008874	0.18439	1035	17754	4209	76974	613	422
GO:0016817	hydrolase activity, acting on acid anhydrides	molecular_function	0.000538	0.023729	1086	17754	4281	76974	598	488
GO:0044422	organelle part	cellular_component	0.99954	1	997	17754	4767	76974	597	400
GO:0044446	intracellular organelle part	cellular_component	0.99974	1	986	17754	4736	76974	590	396
GO:0008270	zinc ion binding	molecular_function	0.53566	1	1000	17754	4305	76974	575	425
GO:0016818	hydrolase activity, acting on acid anhydrides, in phosphorus-containing anhydrides	molecular_function	0.000653	0.026645	1025	17754	4030	76974	567	458
GO:0007154	cell communication	biological_process	0.010496	0.20853	935	17754	3808	76974	561	374
GO:0055085	transmembrane transport	biological_process	0.94254	1	970	17754	4369	76974	558	412
GO:0044711	single-organism biosynthetic process	biological_process	0.003464	0.099177	1013	17754	4096	76974	548	465
GO:0016462	pyrophosphatase activity	molecular_function	0.000879	0.033834	990	17754	3892	76974	545	445
GO:0022857	transmembrane transporter activity	molecular_function	0.99534	1	913	17754	4273	76974	539	374
GO:0071840	cellular component organization or biogenesis	biological_process	0.62745	1	961	17754	4217	76974	530	431
GO:0044281	small molecule metabolic process	biological_process	0.01431	0.24086	1058	17754	4319	76974	528	530
GO:0017111	nucleoside-triphosphatase activity	molecular_function	0.00193	0.062518	948	17754	3744	76974	519	429
GO:0005975	carbohydrate metabolic process	biological_process	0.89422	1	893	17754	3991	76974	510	383
GO:0044444	cytoplasmic part	cellular_component	0.9846	1	939	17754	4434	76974	498	441
GO:0016043	cellular component organization	biological_process	0.80723	1	863	17754	3848	76974	474	389
GO:0023052	signaling	biological_process	0.085545	0.71101	809	17754	3381	76974	466	343
GO:0044700	single organism signaling	biological_process	0.088941	0.72261	808	17754	3379	76974	465	343
GO:0007165	signal transduction	biological_process	0.096155	0.75258	801	17754	3354	76974	461	340
GO:1901566	organonitrogen compound biosynthetic process	biological_process	0.93302	1	937	17754	4300	76974	454	483
GO:0006811	ion transport	biological_process	0.98932	1	734	17754	3449	76974	427	307
GO:0006950	response to stress	biological_process	0.01832	0.28418	693	17754	2838	76974	410	283
GO:0071702	organic substance transport	biological_process	0.99998	1	726	17754	3599	76974	406	320
GO:0048037	cofactor binding	molecular_function	1.12e-09	1.81e-07	763	17754	2751	76974	404	359
GO:0006629	lipid metabolic process	biological_process	1.94e-15	4.55e-12	744	17754	2512	76974	380	364
GO:0006259	DNA metabolic process	biological_process	0.96583	1	718	17754	3316	76974	380	338
GO:0022892	substrate-specific transporter activity	molecular_function	0.99996	1	631	17754	3166	76974	377	254
GO:0043436	oxoacid metabolic process	biological_process	0.000551	0.023978	762	17754	2954	76974	368	394
GO:0006082	organic acid metabolic process	biological_process	0.000759	0.030478	762	17754	2963	76974	368	394
GO:0019752	carboxylic acid metabolic process	biological_process	0.000954	0.03613	746	17754	2903	76974	360	386
GO:0033036	macromolecule localization	biological_process	0.99999	1	647	17754	3238	76974	356	291
GO:0016788	hydrolase activity, acting on ester bonds	molecular_function	0.17809	1	623	17754	2614	76974	355	268
GO:0051641	cellular localization	biological_process	0.99996	1	626	17754	3091	76974	352	274
GO:0022891	substrate-specific transmembrane transporter activity	molecular_function	0.99974	1	577	17754	2859	76974	348	229
GO:0006508	proteolysis	biological_process	0.46271	1	676	17754	2926	76974	343	333
GO:0050662	coenzyme binding	molecular_function	6.78e-09	8.38e-07	628	17754	2249	76974	340	288
GO:0019001	guanyl nucleotide binding	molecular_function	0.013989	0.23796	577	17754	2293	76974	340	237
GO:0016887	ATPase activity	molecular_function	0.009205	0.18959	614	17754	2414	76974	336	278
GO:0008233	peptidase activity	molecular_function	0.88279	1	656	17754	2992	76974	335	321
GO:0032561	guanyl ribonucleotide binding	molecular_function	0.011347	0.2166	569	17754	2253	76974	334	235
GO:0051649	establishment of localization in cell	biological_process	0.99996	1	593	17754	2936	76974	334	259
GO:0005525	GTP binding	molecular_function	0.012151	0.22117	567	17754	2247	76974	333	234
GO:0003723	RNA binding	molecular_function	0.91469	1	610	17754	2765	76974	332	278
GO:0015075	ion transmembrane transporter activity	molecular_function	0.99968	1	552	17754	2732	76974	330	222
GO:0043228	non-membrane-bounded organelle	cellular_component	0.89627	1	611	17754	2836	76974	327	284
GO:0009056	catabolic process	biological_process	0.13668	0.90373	564	17754	2359	76974	316	248
GO:0043232	intracellular non-membrane-bounded organelle	cellular_component	0.92492	1	594	17754	2777	76974	315	279
GO:0070011	peptidase activity, acting on L-amino acid peptides	molecular_function	0.75678	1	617	17754	2752	76974	314	303
GO:0008104	protein localization	biological_process	0.99999	1	569	17754	2877	76974	314	255
GO:0006812	cation transport	biological_process	0.97667	1	523	17754	2470	76974	306	217
GO:0045184	establishment of protein localization	biological_process	0.99999	1	546	17754	2766	76974	301	245
GO:0046907	intracellular transport	biological_process	0.99995	1	532	17754	2650	76974	298	234
GO:0015031	protein transport	biological_process	0.99999	1	536	17754	2723	76974	296	240
GO:0016757	transferase activity, transferring glycosyl groups	molecular_function	0.093891	0.74721	502	17754	2057	76974	288	214
GO:0003700	transcription factor activity, sequence-specific DNA binding	molecular_function	0.001156	0.041106	417	17754	1587	76974	283	134
GO:0001071	nucleic acid binding transcription factor activity	molecular_function	0.0016	0.052854	417	17754	1594	76974	283	134
GO:0051704	multi-organism process	biological_process	0.97865	1	492	17754	2339	76974	274	218
GO:0044428	nuclear part	cellular_component	0.97888	1	417	17754	1993	76974	266	151
GO:0034613	cellular protein localization	biological_process	0.99068	1	486	17754	2293	76974	265	221
GO:0070727	cellular macromolecule localization	biological_process	0.99068	1	486	17754	2293	76974	265	221
GO:0003924	GTPase activity	molecular_function	5.97e-05	0.00342	448	17754	1638	76974	260	188
GO:0098796	membrane protein complex	cellular_component	0.99994	1	475	17754	2439	76974	257	218
GO:0044723	single-organism carbohydrate metabolic process	biological_process	0.7589	1	426	17754	1896	76974	256	170
GO:0006996	organelle organization	biological_process	0.99765	1	448	17754	2182	76974	255	193
GO:0006396	RNA processing	biological_process	0.47827	1	485	17754	2084	76974	253	232
GO:1902494	catalytic complex	cellular_component	0.90377	1	411	17754	1915	76974	249	162
GO:0043531	ADP binding	molecular_function	2.3e-14	1.8e-11	570	17754	1831	76974	247	323
GO:0006886	intracellular protein transport	biological_process	0.98879	1	453	17754	2137	76974	247	206
GO:1901135	carbohydrate derivative metabolic process	biological_process	0.65399	1	450	17754	2000	76974	246	204
GO:0043603	cellular amide metabolic process	biological_process	0.76788	1	560	17754	2552	76974	245	315
GO:0044248	cellular catabolic process	biological_process	0.48712	1	418	17754	1820	76974	239	179
GO:0016758	transferase activity, transferring hexosyl groups	molecular_function	0.022414	0.32188	405	17754	1604	76974	238	167
GO:0044085	cellular component biogenesis	biological_process	0.1695	1	453	17754	1894	76974	238	215
GO:0016798	hydrolase activity, acting on glycosyl bonds	molecular_function	0.36039	1	451	17754	1916	76974	237	214
GO:0008324	cation transmembrane transporter activity	molecular_function	0.99859	1	398	17754	1991	76974	236	162
GO:0004553	hydrolase activity, hydrolyzing O-glycosyl compounds	molecular_function	0.41419	1	431	17754	1841	76974	230	201
GO:0016614	oxidoreductase activity, acting on CH-OH group of donors	molecular_function	6.62e-06	0.000447	400	17754	1429	76974	228	172
GO:0043604	amide biosynthetic process	biological_process	0.81392	1	530	17754	2431	76974	228	302
GO:0006518	peptide metabolic process	biological_process	0.68249	1	512	17754	2318	76974	221	291
GO:0034660	ncRNA metabolic process	biological_process	0.23079	1	449	17754	1869	76974	218	231
GO:0006520	cellular amino acid metabolic process	biological_process	0.64447	1	401	17754	1748	76974	217	184
GO:0005198	structural molecule activity	molecular_function	0.27511	1	437	17754	1920	76974	216	221
GO:1901575	organic substance catabolic process	biological_process	0.22733	1	381	17754	1606	76974	215	166
GO:0016616	oxidoreductase activity, acting on the CH-OH group of donors, NAD or NADP as acceptor	molecular_function	5.55e-08	5.11e-06	377	17754	1295	76974	214	163
GO:0043043	peptide biosynthetic process	biological_process	0.73719	1	494	17754	2252	76974	211	283
GO:0006412	translation	biological_process	0.70847	1	489	17754	2223	76974	207	282
GO:0019637	organophosphate metabolic process	biological_process	0.56173	1	402	17754	1762	76974	206	196
GO:0016192	vesicle-mediated transport	biological_process	0.99177	1	364	17754	1729	76974	204	160
GO:0022890	inorganic cation transmembrane transporter activity	molecular_function	0.99947	1	351	17754	1794	76974	204	147
GO:0005576	extracellular region	cellular_component	0.21916	1	329	17754	1390	76974	202	127
GO:0033554	cellular response to stress	biological_process	0.40087	1	364	17754	1563	76974	198	166
GO:0008610	lipid biosynthetic process	biological_process	1.67e-11	6.04e-09	415	17754	1357	76974	194	221
GO:0044283	small molecule biosynthetic process	biological_process	0.002157	0.069379	385	17754	1460	76974	192	193
GO:0044255	cellular lipid metabolic process	biological_process	4.76e-09	6.04e-07	429	17754	1461	76974	191	238
GO:0043933	macromolecular complex subunit organization	biological_process	0.2072	1	368	17754	1542	76974	190	178
GO:0005509	calcium ion binding	molecular_function	0.005004	0.12565	283	17754	1082	76974	189	94
GO:0004842	ubiquitin-protein transferase activity	molecular_function	0.000101	0.005315	270	17754	949	76974	188	82
GO:0019787	ubiquitin-like protein transferase activity	molecular_function	0.000101	0.005315	270	17754	949	76974	188	82
GO:0043565	sequence-specific DNA binding	molecular_function	1.24e-08	1.45e-06	280	17754	907	76974	187	93
GO:0015672	monovalent inorganic cation transport	biological_process	0.885	1	325	17754	1501	76974	187	138
GO:0006974	cellular response to DNA damage stimulus	biological_process	0.34708	1	344	17754	1460	76974	186	158
GO:1990234	transferase complex	cellular_component	0.9245	1	277	17754	1309	76974	184	93
GO:0030001	metal ion transport	biological_process	0.59661	1	303	17754	1352	76974	183	120
GO:0031090	organelle membrane	cellular_component	0.99545	1	327	17754	1629	76974	183	144
GO:0006399	tRNA metabolic process	biological_process	0.48449	1	377	17754	1611	76974	181	196
GO:0004175	endopeptidase activity	molecular_function	0.98008	1	340	17754	1639	76974	181	159
GO:0016779	nucleotidyltransferase activity	molecular_function	0.91329	1	306	17754	1436	76974	180	126
GO:0022607	cellular component assembly	biological_process	0.37182	1	351	17754	1502	76974	179	172
GO:0006281	DNA repair	biological_process	0.43777	1	325	17754	1392	76974	175	150
GO:0004386	helicase activity	molecular_function	0.066083	0.61329	298	17754	1175	76974	174	124
GO:0030529	ribonucleoprotein complex	cellular_component	0.13294	0.89729	362	17754	1564	76974	174	188
GO:0005506	iron ion binding	molecular_function	2.74e-06	0.000195	351	17754	1224	76974	171	180
GO:0034470	ncRNA processing	biological_process	0.061762	0.59434	326	17754	1302	76974	167	159
GO:0035556	intracellular signal transduction	biological_process	0.5544	1	301	17754	1316	76974	167	134
GO:0051186	cofactor metabolic process	biological_process	0.007501	0.16988	311	17754	1190	76974	165	146
GO:0032501	multicellular organismal process	biological_process	0.18362	1	259	17754	1065	76974	165	94
GO:0016741	transferase activity, transferring one-carbon groups	molecular_function	0.98764	1	318	17754	1544	76974	165	153
GO:1902582	single-organism intracellular transport	biological_process	0.99997	1	258	17754	1385	76974	162	96
GO:0012505	endomembrane system	cellular_component	0.99991	1	289	17754	1520	76974	161	128
GO:0022804	active transmembrane transporter activity	molecular_function	0.036171	0.44294	292	17754	1145	76974	160	132
GO:0008168	methyltransferase activity	molecular_function	0.97418	1	308	17754	1477	76974	159	149
GO:0016053	organic acid biosynthetic process	biological_process	0.000615	0.02625	318	17754	1165	76974	156	162
GO:0046394	carboxylic acid biosynthetic process	biological_process	0.000615	0.02625	318	17754	1165	76974	156	162
GO:0042578	phosphoric ester hydrolase activity	molecular_function	0.012365	0.2242	238	17754	895	76974	153	85
GO:0032787	monocarboxylic acid metabolic process	biological_process	8.62e-10	1.69e-07	333	17754	1073	76974	151	182
GO:0055086	nucleobase-containing small molecule metabolic process	biological_process	0.53466	1	289	17754	1269	76974	150	139
GO:0016829	lyase activity	molecular_function	0.003282	0.095722	376	17754	1444	76974	149	227
GO:0046906	tetrapyrrole binding	molecular_function	0.009319	0.19026	304	17754	1170	76974	148	156
GO:0020037	heme binding	molecular_function	0.003059	0.091484	302	17754	1139	76974	147	155
GO:0034220	ion transmembrane transport	biological_process	0.99778	1	250	17754	1280	76974	144	106
GO:0098588	bounding membrane of organelle	cellular_component	0.99601	1	258	17754	1304	76974	143	115
GO:0071822	protein complex subunit organization	biological_process	0.067318	0.61985	296	17754	1188	76974	142	154
GO:0007049	cell cycle	biological_process	0.35555	1	243	17754	1036	76974	142	101
GO:0071944	cell periphery	cellular_component	0.98397	1	255	17754	1257	76974	142	113
GO:0044877	macromolecular complex binding	molecular_function	0.90572	1	254	17754	1177	76974	141	113
GO:0015077	monovalent inorganic cation transmembrane transporter activity	molecular_function	0.97147	1	241	17754	1176	76974	139	102
GO:0016705	oxidoreductase activity, acting on paired donors, with incorporation or reduction of molecular oxygen	molecular_function	0.000522	0.023559	293	17754	1064	76974	137	156
GO:0006310	DNA recombination	biological_process	0.21263	1	240	17754	985	76974	137	103
GO:0043233	organelle lumen	cellular_component	0.99996	1	218	17754	1207	76974	136	82
GO:0070013	intracellular organelle lumen	cellular_component	0.99996	1	218	17754	1207	76974	136	82
GO:0031974	membrane-enclosed lumen	cellular_component	0.99997	1	218	17754	1215	76974	136	82
GO:0065003	macromolecular complex assembly	biological_process	0.13721	0.90373	275	17754	1125	76974	135	140
GO:0044262	cellular carbohydrate metabolic process	biological_process	0.82441	1	206	17754	944	76974	133	73
GO:0009117	nucleotide metabolic process	biological_process	0.24913	1	260	17754	1091	76974	132	128
GO:0006753	nucleoside phosphate metabolic process	biological_process	0.25864	1	260	17754	1093	76974	132	128
GO:0008236	serine-type peptidase activity	molecular_function	0.33887	1	284	17754	1205	76974	132	152
GO:0017171	serine hydrolase activity	molecular_function	0.33887	1	284	17754	1205	76974	132	152
GO:0008033	tRNA processing	biological_process	0.21444	1	254	17754	1044	76974	130	124
GO:0006260	DNA replication	biological_process	0.96328	1	253	17754	1228	76974	130	123
GO:0006461	protein complex assembly	biological_process	0.10159	0.77948	267	17754	1079	76974	129	138
GO:0070271	protein complex biogenesis	biological_process	0.10474	0.79205	267	17754	1080	76974	129	138
GO:1901137	carbohydrate derivative biosynthetic process	biological_process	0.99589	1	237	17754	1205	76974	128	109
GO:0031981	nuclear lumen	cellular_component	0.99997	1	206	17754	1151	76974	128	78
GO:0046983	protein dimerization activity	molecular_function	0.011232	0.2153	265	17754	1011	76974	127	138
GO:0016791	phosphatase activity	molecular_function	0.003537	0.099969	188	17754	676	76974	126	62
GO:0016746	transferase activity, transferring acyl groups	molecular_function	0.003598	0.099969	277	17754	1045	76974	126	151
GO:0044764	multi-organism cellular process	biological_process	0.89964	1	245	17754	1160	76974	125	120
GO:0016051	carbohydrate biosynthetic process	biological_process	0.95881	1	182	17754	882	76974	125	57
GO:1902589	single-organism organelle organization	biological_process	0.99984	1	213	17754	1134	76974	124	89
GO:0051276	chromosome organization	biological_process	0.85416	1	204	17754	945	76974	122	82
GO:0065008	regulation of biological quality	biological_process	0.98993	1	241	17754	1225	76974	122	119
GO:0060089	molecular transducer activity	molecular_function	0.99981	1	198	17754	1078	76974	121	77
GO:0051287	NAD binding	molecular_function	5.92e-05	0.00342	227	17754	782	76974	119	108
GO:0004871	signal transducer activity	molecular_function	0.99953	1	195	17754	1049	76974	119	76
GO:0042221	response to chemical	biological_process	4.44e-10	1.23e-07	235	17754	724	76974	116	119
GO:0009057	macromolecule catabolic process	biological_process	0.62196	1	191	17754	853	76974	116	75
GO:0000151	ubiquitin ligase complex	cellular_component	6.87e-05	0.003832	169	17754	563	76974	115	54
GO:1901657	glycosyl compound metabolic process	biological_process	0.80044	1	218	17754	1004	76974	115	103
GO:0009116	nucleoside metabolic process	biological_process	0.81653	1	217	17754	1003	76974	115	102
GO:0090407	organophosphate biosynthetic process	biological_process	0.94503	1	223	17754	1069	76974	115	108
GO:0000152	nuclear ubiquitin ligase complex	cellular_component	3.36e-05	0.001969	167	17754	549	76974	114	53
GO:0005680	anaphase-promoting complex	cellular_component	3.36e-05	0.001969	167	17754	549	76974	114	53
GO:0031461	cullin-RING ubiquitin ligase complex	cellular_component	3.36e-05	0.001969	167	17754	549	76974	114	53
GO:0044421	extracellular region part	cellular_component	0.011659	0.21762	161	17754	603	76974	114	47
GO:0019012	virion	cellular_component	0.70122	1	205	17754	919	76974	112	93
GO:0006732	coenzyme metabolic process	biological_process	0.028012	0.38079	215	17754	826	76974	111	104
GO:0003735	structural constituent of ribosome	molecular_function	0.18481	1	248	17754	1095	76974	111	137
GO:0044419	interspecies interaction between organisms	biological_process	0.99914	1	217	17754	1146	76974	111	106
GO:0044403	symbiosis, encompassing mutualism through parasitism	biological_process	0.99927	1	216	17754	1144	76974	111	105
GO:0046873	metal ion transmembrane transporter activity	molecular_function	0.99966	1	185	17754	1009	76974	111	74
GO:0098655	cation transmembrane transport	biological_process	0.99979	1	191	17754	1044	76974	111	80
GO:0016482	cytoplasmic transport	biological_process	0.99812	1	176	17754	922	76974	110	66
GO:0098662	inorganic cation transmembrane transport	biological_process	0.9998	1	190	17754	1040	76974	110	80
GO:0098660	inorganic ion transmembrane transport	biological_process	0.99981	1	190	17754	1041	76974	110	80
GO:0005840	ribosome	cellular_component	0.24984	1	244	17754	1090	76974	109	135
GO:0032403	protein complex binding	molecular_function	0.71999	1	202	17754	902	76974	109	93
GO:0008092	cytoskeletal protein binding	molecular_function	0.997	1	189	17754	962	76974	109	80
GO:0006631	fatty acid metabolic process	biological_process	2.3e-09	3.38e-07	246	17754	760	76974	108	138
GO:0019693	ribose phosphate metabolic process	biological_process	0.3327	1	217	17754	923	76974	108	109
GO:0016853	isomerase activity	molecular_function	0.78777	1	189	17754	879	76974	108	81
GO:0005694	chromosome	cellular_component	0.92668	1	188	17754	891	76974	108	80
GO:0044423	virion part	cellular_component	0.6701	1	197	17754	879	76974	107	90
GO:0098772	molecular function regulator	molecular_function	0.79537	1	214	17754	985	76974	107	107
GO:0003678	DNA helicase activity	molecular_function	0.056458	0.57761	196	17754	755	76974	105	91
GO:0034622	cellular macromolecular complex assembly	biological_process	0.30569	1	216	17754	910	76974	105	111
GO:1901605	alpha-amino acid metabolic process	biological_process	0.9608	1	183	17754	882	76974	105	78
GO:0072521	purine-containing compound metabolic process	biological_process	0.64222	1	208	17754	927	76974	104	104
GO:0022414	reproductive process	biological_process	0.015014	0.2474	144	17754	521	76974	103	41
GO:0006914	autophagy	biological_process	0.26128	1	186	17754	774	76974	103	83
GO:0006820	anion transport	biological_process	0.4719	1	185	17754	799	76974	103	82
GO:0016032	viral process	biological_process	0.70965	1	204	17754	915	76974	103	101
GO:0030234	enzyme regulator activity	molecular_function	0.31543	1	199	17754	849	76974	102	97
GO:0051188	cofactor biosynthetic process	biological_process	0.35009	1	180	17754	756	76974	102	78
GO:0008194	UDP-glycosyltransferase activity	molecular_function	0.98659	1	145	17754	732	76974	102	43
GO:0006163	purine nucleotide metabolic process	biological_process	0.57955	1	202	17754	892	76974	101	101
GO:0005976	polysaccharide metabolic process	biological_process	0.68686	1	150	17754	678	76974	100	50
GO:0044703	multi-organism reproductive process	biological_process	0.005348	0.13104	139	17754	487	76974	99	40
GO:0009259	ribonucleotide metabolic process	biological_process	0.58234	1	199	17754	880	76974	99	100
GO:0009150	purine ribonucleotide metabolic process	biological_process	0.5669	1	198	17754	873	76974	98	100
GO:0008652	cellular amino acid biosynthetic process	biological_process	0.64424	1	162	17754	716	76974	98	64
GO:0016874	ligase activity	molecular_function	0.97863	1	241	17754	1149	76974	98	143
GO:0016747	transferase activity, transferring acyl groups other than amino-acyl groups	molecular_function	6.67e-06	0.000447	219	17754	731	76974	97	122
GO:0003724	RNA helicase activity	molecular_function	0.079686	0.68964	141	17754	540	76974	97	44
GO:0042623	ATPase activity, coupled	molecular_function	0.0999	0.76781	179	17754	707	76974	97	82
GO:0034637	cellular carbohydrate biosynthetic process	biological_process	0.96797	1	136	17754	676	76974	97	39
GO:0005856	cytoskeleton	cellular_component	0.99874	1	160	17754	842	76974	97	63
GO:0042278	purine nucleoside metabolic process	biological_process	0.70038	1	189	17754	852	76974	96	93
GO:0046128	purine ribonucleoside metabolic process	biological_process	0.70038	1	189	17754	852	76974	96	93
GO:0009119	ribonucleoside metabolic process	biological_process	0.86371	1	190	17754	893	76974	96	94
GO:0044430	cytoskeletal part	cellular_component	0.99809	1	153	17754	802	76974	95	58
GO:0043623	cellular protein complex assembly	biological_process	0.31548	1	194	17754	814	76974	94	100
GO:0070647	protein modification by small protein conjugation or removal	biological_process	0.33541	1	145	17754	597	76974	94	51
GO:0044427	chromosomal part	cellular_component	0.95794	1	158	17754	770	76974	94	64
GO:0008289	lipid binding	molecular_function	0.001315	0.046414	164	17754	571	76974	93	71
GO:0006091	generation of precursor metabolites and energy	biological_process	0.004433	0.11501	208	17754	767	76974	93	115
GO:0016820	hydrolase activity, acting on acid anhydrides, catalyzing transmembrane movement of substances	molecular_function	0.16489	0.99474	158	17754	638	76974	93	65
GO:0015078	hydrogen ion transmembrane transporter activity	molecular_function	0.8936	1	167	17754	795	76974	93	74
GO:0022402	cell cycle process	biological_process	0.85814	1	140	17754	654	76974	91	49
GO:0034062	RNA polymerase activity	molecular_function	0.99632	1	146	17754	789	76974	91	55
GO:0044712	single-organism catabolic process	biological_process	0.55838	1	162	17754	709	76974	90	72
GO:0008037	cell recognition	biological_process	0.000852	0.03305	119	17754	388	76974	89	30
GO:0005739	mitochondrion	cellular_component	0.86416	1	162	17754	774	76974	89	73
GO:0098805	whole membrane	cellular_component	0.97473	1	155	17754	770	76974	89	66
GO:0009856	pollination	biological_process	0.000838	0.032804	117	17754	380	76974	88	29
GO:0009875	pollen-pistil interaction	biological_process	0.000838	0.032804	117	17754	380	76974	88	29
GO:0048544	recognition of pollen	biological_process	0.000838	0.032804	117	17754	380	76974	88	29
GO:0044706	multi-multicellular organism process	biological_process	0.001686	0.054966	117	17754	387	76974	88	29
GO:0015399	primary active transmembrane transporter activity	molecular_function	0.10542	0.79338	147	17754	576	76974	88	59
GO:0015405	P-P-bond-hydrolysis-driven transmembrane transporter activity	molecular_function	0.10542	0.79338	147	17754	576	76974	88	59
GO:0030117	membrane coat	cellular_component	0.8966	1	157	17754	736	76974	88	69
GO:0048475	coated membrane	cellular_component	0.8966	1	157	17754	736	76974	88	69
GO:0050660	flavin adenine dinucleotide binding	molecular_function	0.051137	0.55078	188	17754	724	76974	86	102
GO:0006818	hydrogen transport	biological_process	0.99865	1	161	17754	858	76974	86	75
GO:0015992	proton transport	biological_process	0.99865	1	161	17754	858	76974	86	75
GO:0005654	nucleoplasm	cellular_component	0.99998	1	130	17754	780	76974	86	44
GO:0044451	nucleoplasm part	cellular_component	0.99998	1	130	17754	780	76974	86	44
GO:0008202	steroid metabolic process	biological_process	6.24e-07	4.96e-05	145	17754	448	76974	85	60
GO:0007264	small GTPase mediated signal transduction	biological_process	0.89308	1	147	17754	702	76974	85	62
GO:0006694	steroid biosynthetic process	biological_process	3.39e-07	2.89e-05	144	17754	439	76974	84	60
GO:0009378	four-way junction helicase activity	molecular_function	0.036158	0.44294	146	17754	543	76974	84	62
GO:0008134	transcription factor binding	molecular_function	0.15898	0.97848	163	17754	650	76974	84	79
GO:1901607	alpha-amino acid biosynthetic process	biological_process	0.64893	1	141	17754	625	76974	84	57
GO:0032502	developmental process	biological_process	0.70792	1	165	17754	751	76974	84	81
GO:0009451	RNA modification	biological_process	0.96956	1	153	17754	748	76974	84	69
GO:0004518	nuclease activity	molecular_function	0.99655	1	156	17754	818	76974	83	73
GO:0044767	single-organism developmental process	biological_process	0.53713	1	158	17754	698	76974	82	76
GO:0003854	3-beta-hydroxy-delta5-steroid dehydrogenase activity	molecular_function	5.98e-07	4.84e-05	140	17754	428	76974	81	59
GO:0016229	steroid dehydrogenase activity	molecular_function	5.98e-07	4.84e-05	140	17754	428	76974	81	59
GO:0033764	steroid dehydrogenase activity, acting on the CH-OH group of donors, NAD or NADP as acceptor	molecular_function	5.98e-07	4.84e-05	140	17754	428	76974	81	59
GO:0031012	extracellular matrix	cellular_component	3.33e-05	0.001969	100	17754	310	76974	81	19
GO:0006952	defense response	biological_process	0.02927	0.39557	116	17754	439	76974	81	35
GO:0044264	cellular polysaccharide metabolic process	biological_process	0.61327	1	122	17754	545	76974	81	41
GO:0005216	ion channel activity	molecular_function	0.9789	1	125	17754	631	76974	81	44
GO:0022838	substrate-specific channel activity	molecular_function	0.9789	1	125	17754	631	76974	81	44
GO:0015267	channel activity	molecular_function	0.97978	1	125	17754	632	76974	81	44
GO:0022803	passive transmembrane transporter activity	molecular_function	0.97978	1	125	17754	632	76974	81	44
GO:0030246	carbohydrate binding	molecular_function	0.18475	1	142	17754	567	76974	80	62
GO:0016071	mRNA metabolic process	biological_process	0.9642	1	132	17754	652	76974	80	52
GO:0019028	viral capsid	cellular_component	0.54746	1	153	17754	669	76974	79	74
GO:0044265	cellular macromolecule catabolic process	biological_process	0.78349	1	136	17754	628	76974	79	57
GO:0046527	glucosyltransferase activity	molecular_function	0.98063	1	110	17754	563	76974	78	32
GO:0033365	protein localization to organelle	biological_process	0.99468	1	125	17754	663	76974	78	47
GO:0004674	protein serine/threonine kinase activity	molecular_function	0.47966	1	128	17754	543	76974	77	51
GO:0042592	homeostatic process	biological_process	0.78848	1	156	17754	751	76974	77	79
GO:0061024	membrane organization	biological_process	0.82108	1	121	17754	568	76974	76	45
GO:0005578	proteinaceous extracellular matrix	cellular_component	8.73e-05	0.004714	93	17754	291	76974	75	18
GO:0019058	viral life cycle	biological_process	0.61871	1	142	17754	628	76974	75	67
GO:0006073	cellular glucan metabolic process	biological_process	0.66056	1	116	17754	524	76974	75	41
GO:0044042	glucan metabolic process	biological_process	0.66056	1	116	17754	524	76974	75	41
GO:1902580	single-organism cellular localization	biological_process	0.98825	1	127	17754	660	76974	75	52
GO:0006813	potassium ion transport	biological_process	0.021109	0.31369	116	17754	421	76974	74	42
GO:0042626	ATPase activity, coupled to transmembrane movement of substances	molecular_function	0.075749	0.66949	123	17754	472	76974	74	49
GO:0043492	ATPase activity, coupled to movement of substances	molecular_function	0.075749	0.66949	123	17754	472	76974	74	49
GO:0033013	tetrapyrrole metabolic process	biological_process	0.08371	0.70004	131	17754	510	76974	74	57
GO:0044707	single-multicellular organism process	biological_process	0.87421	1	131	17754	624	76974	73	58
GO:0048193	Golgi vesicle transport	biological_process	0.95865	1	113	17754	558	76974	73	40
GO:0007186	G-protein coupled receptor signaling pathway	biological_process	0.93804	1	113	17754	571	76974	72	41
GO:0035251	UDP-glucosyltransferase activity	molecular_function	0.98625	1	103	17754	536	76974	72	31
GO:0006605	protein targeting	biological_process	0.99422	1	121	17754	643	76974	72	49
GO:0015291	secondary active transmembrane transporter activity	molecular_function	0.034837	0.44294	141	17754	526	76974	71	70
GO:0032446	protein modification by small protein conjugation	biological_process	0.26684	1	95	17754	382	76974	71	24
GO:0008237	metallopeptidase activity	molecular_function	0.36398	1	122	17754	504	76974	71	51
GO:0009108	coenzyme biosynthetic process	biological_process	0.31042	1	124	17754	513	76974	70	54
GO:0009161	ribonucleoside monophosphate metabolic process	biological_process	0.8041	1	142	17754	662	76974	70	72
GO:0009123	nucleoside monophosphate metabolic process	biological_process	0.81979	1	142	17754	665	76974	70	72
GO:0072594	establishment of protein localization to organelle	biological_process	0.98165	1	115	17754	593	76974	70	45
GO:0031975	envelope	cellular_component	0.99542	1	133	17754	709	76974	70	63
GO:0016567	protein ubiquitination	biological_process	0.22665	1	90	17754	357	76974	69	21
GO:0009165	nucleotide biosynthetic process	biological_process	0.69426	1	138	17754	626	76974	69	69
GO:1901293	nucleoside phosphate biosynthetic process	biological_process	0.69426	1	138	17754	626	76974	69	69
GO:0044802	single-organism membrane organization	biological_process	0.77309	1	110	17754	512	76974	69	41
GO:0009126	purine nucleoside monophosphate metabolic process	biological_process	0.79213	1	141	17754	655	76974	69	72
GO:0009167	purine ribonucleoside monophosphate metabolic process	biological_process	0.79213	1	141	17754	655	76974	69	72
GO:0044429	mitochondrial part	cellular_component	0.91708	1	123	17754	607	76974	69	54
GO:0031967	organelle envelope	cellular_component	0.9923	1	128	17754	676	76974	69	59
GO:0003899	DNA-directed RNA polymerase activity	molecular_function	0.99907	1	113	17754	653	76974	69	44
GO:0019725	cellular homeostasis	biological_process	0.15512	0.96226	133	17754	551	76974	68	65
GO:0009141	nucleoside triphosphate metabolic process	biological_process	0.92848	1	132	17754	646	76974	67	65
GO:0009144	purine nucleoside triphosphate metabolic process	biological_process	0.92848	1	132	17754	646	76974	67	65
GO:0009199	ribonucleoside triphosphate metabolic process	biological_process	0.92848	1	132	17754	646	76974	67	65
GO:0009205	purine ribonucleoside triphosphate metabolic process	biological_process	0.92848	1	132	17754	646	76974	67	65
GO:0006397	mRNA processing	biological_process	0.78997	1	108	17754	498	76974	66	42
GO:0046034	ATP metabolic process	biological_process	0.87248	1	130	17754	620	76974	66	64
GO:0033692	cellular polysaccharide biosynthetic process	biological_process	0.90423	1	96	17754	468	76974	66	30
GO:0000271	polysaccharide biosynthetic process	biological_process	0.92283	1	96	17754	473	76974	66	30
GO:0005783	endoplasmic reticulum	cellular_component	0.99908	1	130	17754	728	76974	66	64
GO:0007010	cytoskeleton organization	biological_process	0.99992	1	120	17754	689	76974	66	54
GO:0005886	plasma membrane	cellular_component	0.99998	1	116	17754	712	76974	66	50
GO:0030163	protein catabolic process	biological_process	0.38999	1	113	17754	482	76974	65	48
GO:0016627	oxidoreductase activity, acting on the CH-CH group of donors	molecular_function	0.57057	1	119	17754	523	76974	65	54
GO:1902600	hydrogen ion transmembrane transport	biological_process	0.99887	1	126	17754	696	76974	65	61
GO:0042802	identical protein binding	molecular_function	0.1318	0.89729	130	17754	510	76974	64	66
GO:0031966	mitochondrial membrane	cellular_component	0.88642	1	113	17754	551	76974	64	49
GO:0005740	mitochondrial envelope	cellular_component	0.90125	1	115	17754	565	76974	64	51
GO:0000988	transcription factor activity, protein binding	molecular_function	0.94421	1	107	17754	539	76974	64	43
GO:0006400	tRNA modification	biological_process	0.99363	1	110	17754	576	76974	64	46
GO:0006928	movement of cell or subcellular component	biological_process	0.27045	1	121	17754	496	76974	63	58
GO:0008509	anion transmembrane transporter activity	molecular_function	0.68912	1	116	17754	521	76974	63	53
GO:0016701	oxidoreductase activity, acting on single donors with incorporation of molecular oxygen	molecular_function	0.573	1	100	17754	437	76974	62	38
GO:0040011	locomotion	biological_process	0.16275	0.99474	104	17754	414	76974	61	43
GO:0009055	electron carrier activity	molecular_function	0.31055	1	110	17754	479	76974	61	49
GO:0070085	glycosylation	biological_process	0.32546	1	102	17754	421	76974	61	41
GO:0048519	negative regulation of biological process	biological_process	0.060956	0.58781	120	17754	458	76974	60	60
GO:0000003	reproduction	biological_process	0.50551	1	102	17754	448	76974	60	42
GO:0009250	glucan biosynthetic process	biological_process	0.92928	1	90	17754	447	76974	60	30
GO:0016469	proton-transporting two-sector ATPase complex	cellular_component	0.99164	1	115	17754	611	76974	60	55
GO:0004872	receptor activity	molecular_function	1	1	98	17754	642	76974	60	38
GO:0008238	exopeptidase activity	molecular_function	0.1736	1	137	17754	548	76974	59	78
GO:0044257	cellular protein catabolic process	biological_process	0.5631	1	105	17754	464	76974	59	46
GO:0051603	proteolysis involved in cellular protein catabolic process	biological_process	0.5631	1	105	17754	464	76974	59	46
GO:0071705	nitrogen compound transport	biological_process	0.98726	1	108	17754	571	76974	59	49
GO:0000287	magnesium ion binding	molecular_function	2.21e-11	7.43e-09	166	17754	451	76974	58	108
GO:0072330	monocarboxylic acid biosynthetic process	biological_process	1.57e-08	1.68e-06	155	17754	447	76974	58	97
GO:0005102	receptor binding	molecular_function	0.86332	1	117	17754	550	76974	58	59
GO:0038023	signaling receptor activity	molecular_function	1	1	95	17754	613	76974	58	37
GO:0006733	oxidoreduction coenzyme metabolic process	biological_process	0.000298	0.013984	104	17754	330	76974	57	47
GO:0022613	ribonucleoprotein complex biogenesis	biological_process	0.10803	0.81021	100	17754	390	76974	57	43
GO:0051273	beta-glucan metabolic process	biological_process	0.95676	1	88	17754	448	76974	57	31
GO:0006366	transcription from RNA polymerase II promoter	biological_process	0.99996	1	94	17754	582	76974	57	37
GO:0006633	fatty acid biosynthetic process	biological_process	3.41e-08	3.34e-06	146	17754	420	76974	56	90
GO:0009101	glycoprotein biosynthetic process	biological_process	0.7687	1	79	17754	364	76974	56	23
GO:0009100	glycoprotein metabolic process	biological_process	0.77742	1	79	17754	365	76974	56	23
GO:0051274	beta-glucan biosynthetic process	biological_process	0.93874	1	85	17754	427	76974	56	29
GO:0000775	chromosome, centromeric region	cellular_component	0.99738	1	87	17754	483	76974	56	31
GO:0098687	chromosomal region	cellular_component	0.99856	1	87	17754	491	76974	56	31
GO:0098519	nucleotide phosphatase activity, acting on free nucleotides	molecular_function	0.006894	0.15792	89	17754	299	76974	55	34
GO:0006778	porphyrin-containing compound metabolic process	biological_process	0.025224	0.35359	96	17754	347	76974	55	41
GO:0070925	organelle assembly	biological_process	0.32622	1	82	17754	342	76974	55	27
GO:0003779	actin binding	molecular_function	0.63297	1	82	17754	365	76974	55	27
GO:0009311	oligosaccharide metabolic process	biological_process	0.67394	1	87	17754	389	76974	54	33
GO:0019867	outer membrane	cellular_component	0.93312	1	93	17754	461	76974	54	39
GO:0042440	pigment metabolic process	biological_process	0.005358	0.13104	93	17754	317	76974	53	40
GO:0042254	ribosome biogenesis	biological_process	0.06764	0.6216	95	17754	361	76974	53	42
GO:0006511	ubiquitin-dependent protein catabolic process	biological_process	0.56188	1	91	17754	400	76974	53	38
GO:0019941	modification-dependent protein catabolic process	biological_process	0.58392	1	91	17754	402	76974	53	38
GO:0043632	modification-dependent macromolecule catabolic process	biological_process	0.58392	1	91	17754	402	76974	53	38
GO:0006352	DNA-templated transcription, initiation	biological_process	0.97816	1	90	17754	470	76974	53	37
GO:0016209	antioxidant activity	molecular_function	0.10259	0.78239	109	17754	435	76974	52	57
GO:0006457	protein folding	biological_process	0.14761	0.9418	121	17754	489	76974	52	69
GO:0048856	anatomical structure development	biological_process	0.23021	1	101	17754	412	76974	52	49
GO:0031410	cytoplasmic vesicle	cellular_component	0.63511	1	79	17754	348	76974	52	27
GO:0031982	vesicle	cellular_component	0.67672	1	79	17754	352	76974	52	27
GO:0006486	protein glycosylation	biological_process	0.79027	1	73	17754	340	76974	52	21
GO:0043413	macromolecule glycosylation	biological_process	0.79027	1	73	17754	340	76974	52	21
GO:0048518	positive regulation of biological process	biological_process	0.99133	1	92	17754	495	76974	52	40
GO:0016835	carbon-oxygen lyase activity	molecular_function	1.15e-07	1.02e-05	177	17754	541	76974	51	126
GO:0015297	antiporter activity	molecular_function	0.040891	0.48614	105	17754	383	76974	51	54
GO:0030170	pyridoxal phosphate binding	molecular_function	0.046141	0.51723	109	17754	404	76974	51	58
GO:0019439	aromatic compound catabolic process	biological_process	0.32255	1	84	17754	349	76974	51	33
GO:1901361	organic cyclic compound catabolic process	biological_process	0.41858	1	84	17754	359	76974	51	33
GO:0016023	cytoplasmic membrane-bounded vesicle	cellular_component	0.62923	1	78	17754	343	76974	51	27
GO:0031988	membrane-bounded vesicle	cellular_component	0.6714	1	78	17754	347	76974	51	27
GO:0043038	amino acid activation	biological_process	0.85489	1	123	17754	567	76974	51	72
GO:0043039	tRNA aminoacylation	biological_process	0.85489	1	123	17754	567	76974	51	72
GO:0072522	purine-containing compound biosynthetic process	biological_process	0.93675	1	105	17754	523	76974	51	54
GO:0070008	serine-type exopeptidase activity	molecular_function	0.018336	0.28418	112	17754	404	76974	50	62
GO:0045454	cell redox homeostasis	biological_process	0.054639	0.57189	100	17754	387	76974	50	50
GO:0052689	carboxylic ester hydrolase activity	molecular_function	0.10528	0.79338	96	17754	372	76974	50	46
GO:0051213	dioxygenase activity	molecular_function	0.82654	1	79	17754	371	76974	50	29
GO:0072657	protein localization to membrane	biological_process	0.9666	1	72	17754	380	76974	50	22
GO:0090150	establishment of protein localization to membrane	biological_process	0.97025	1	71	17754	377	76974	50	21
GO:0004252	serine-type endopeptidase activity	molecular_function	0.9903	1	109	17754	572	76974	50	59
GO:0005794	Golgi apparatus	cellular_component	0.22941	1	81	17754	324	76974	49	32
GO:0015980	energy derivation by oxidation of organic compounds	biological_process	0.38783	1	86	17754	362	76974	49	37
GO:0033014	tetrapyrrole biosynthetic process	biological_process	0.39671	1	87	17754	366	76974	49	38
GO:0016702	oxidoreductase activity, acting on single donors with incorporation of molecular oxygen, incorporation of two atoms of oxygen	molecular_function	0.67826	1	76	17754	341	76974	49	27
GO:0006418	tRNA aminoacylation for protein translation	biological_process	0.80627	1	115	17754	523	76974	49	66
GO:0048522	positive regulation of cellular process	biological_process	0.98886	1	87	17754	467	76974	49	38
GO:0048523	negative regulation of cellular process	biological_process	0.031505	0.41779	98	17754	358	76974	48	50
GO:0016052	carbohydrate catabolic process	biological_process	0.19663	1	98	17754	392	76974	48	50
GO:1901565	organonitrogen compound catabolic process	biological_process	0.23082	1	81	17754	329	76974	48	33
GO:0015698	inorganic anion transport	biological_process	0.30901	1	87	17754	354	76974	48	39
GO:0019031	viral envelope	cellular_component	0.60454	1	83	17754	367	76974	48	35
GO:0036338	viral membrane	cellular_component	0.60454	1	83	17754	367	76974	48	35
GO:0006164	purine nucleotide biosynthetic process	biological_process	0.91104	1	99	17754	488	76974	48	51
GO:0010033	response to organic substance	biological_process	1.89e-05	0.0012	94	17754	278	76974	47	47
GO:0016903	oxidoreductase activity, acting on the aldehyde or oxo group of donors	molecular_function	0.001333	0.046706	82	17754	263	76974	47	35
GO:0045333	cellular respiration	biological_process	0.23598	1	81	17754	327	76974	47	34
GO:0004222	metalloendopeptidase activity	molecular_function	0.2956	1	81	17754	327	76974	47	34
GO:0030243	cellulose metabolic process	biological_process	0.33804	1	76	17754	309	76974	47	29
GO:0046700	heterocycle catabolic process	biological_process	0.46519	1	80	17754	346	76974	47	33
GO:0044270	cellular nitrogen compound catabolic process	biological_process	0.58266	1	80	17754	356	76974	47	33
GO:0006325	chromatin organization	biological_process	0.60227	1	78	17754	351	76974	47	31
GO:0016875	ligase activity, forming carbon-oxygen bonds	molecular_function	0.92064	1	118	17754	560	76974	47	71
GO:0016876	ligase activity, forming aminoacyl-tRNA and related compounds	molecular_function	0.92064	1	118	17754	560	76974	47	71
GO:0022836	gated channel activity	molecular_function	0.9433	1	78	17754	393	76974	47	31
GO:0003712	transcription cofactor activity	molecular_function	0.98614	1	77	17754	423	76974	47	30
GO:0000989	transcription factor activity, transcription factor binding	molecular_function	0.98849	1	77	17754	426	76974	47	30
GO:0019362	pyridine nucleotide metabolic process	biological_process	0.001457	0.049928	90	17754	291	76974	46	44
GO:0046496	nicotinamide nucleotide metabolic process	biological_process	0.001457	0.049928	90	17754	291	76974	46	44
GO:0072524	pyridine-containing compound metabolic process	biological_process	0.004369	0.11412	92	17754	309	76974	46	46
GO:0042803	protein homodimerization activity	molecular_function	0.014691	0.24609	91	17754	319	76974	46	45
GO:0030244	cellulose biosynthetic process	biological_process	0.24938	1	73	17754	288	76974	46	27
GO:0001871	pattern binding	molecular_function	0.43894	1	74	17754	311	76974	46	28
GO:0030247	polysaccharide binding	molecular_function	0.43894	1	74	17754	311	76974	46	28
GO:0004812	aminoacyl-tRNA ligase activity	molecular_function	0.87549	1	114	17754	531	76974	46	68
GO:0009260	ribonucleotide biosynthetic process	biological_process	0.91518	1	96	17754	476	76974	46	50
GO:0046390	ribose phosphate biosynthetic process	biological_process	0.91518	1	96	17754	476	76974	46	50
GO:0015979	photosynthesis	biological_process	0.004894	0.12423	135	17754	504	76974	45	90
GO:0071554	cell wall organization or biogenesis	biological_process	0.027461	0.37597	76	17754	270	76974	45	31
GO:0008135	translation factor activity, RNA binding	molecular_function	0.2252	1	90	17754	368	76974	45	45
GO:0044431	Golgi apparatus part	cellular_component	0.26023	1	74	17754	298	76974	45	29
GO:0007275	multicellular organismal development	biological_process	0.37174	1	78	17754	332	76974	45	33
GO:0051082	unfolded protein binding	molecular_function	0.67572	1	99	17754	446	76974	45	54
GO:0008234	cysteine-type peptidase activity	molecular_function	0.77147	1	81	17754	379	76974	45	36
GO:0015849	organic acid transport	biological_process	0.77784	1	84	17754	396	76974	45	39
GO:0046942	carboxylic acid transport	biological_process	0.77784	1	84	17754	396	76974	45	39
GO:0015711	organic anion transport	biological_process	0.79408	1	84	17754	398	76974	45	39
GO:0044433	cytoplasmic vesicle part	cellular_component	0.8017	1	68	17754	315	76974	45	23
GO:0009152	purine ribonucleotide biosynthetic process	biological_process	0.90776	1	95	17754	469	76974	45	50
GO:0051301	cell division	biological_process	0.97019	1	75	17754	391	76974	45	30
GO:0007017	microtubule-based process	biological_process	0.98887	1	90	17754	473	76974	45	45
GO:0009605	response to external stimulus	biological_process	0.99558	1	83	17754	482	76974	45	38
GO:0016830	carbon-carbon lyase activity	molecular_function	0.99632	1	100	17754	550	76974	45	55
GO:0042995	cell projection	cellular_component	0.42508	1	73	17754	307	76974	44	29
GO:0044455	mitochondrial membrane part	cellular_component	0.59414	1	73	17754	332	76974	44	29
GO:0030659	cytoplasmic vesicle membrane	cellular_component	0.79822	1	67	17754	310	76974	44	23
GO:0030120	vesicle coat	cellular_component	0.82299	1	65	17754	304	76974	44	21
GO:0030135	coated vesicle	cellular_component	0.82299	1	65	17754	304	76974	44	21
GO:0030662	coated vesicle membrane	cellular_component	0.82299	1	65	17754	304	76974	44	21
GO:0012506	vesicle membrane	cellular_component	0.82975	1	67	17754	314	76974	44	23
GO:0002949	tRNA threonylcarbamoyladenosine modification	biological_process	0.96215	1	73	17754	369	76974	44	29
GO:0070525	tRNA threonylcarbamoyladenosine metabolic process	biological_process	0.96215	1	73	17754	369	76974	44	29
GO:0042451	purine nucleoside biosynthetic process	biological_process	0.96353	1	89	17754	459	76974	44	45
GO:0046129	purine ribonucleoside biosynthetic process	biological_process	0.96353	1	89	17754	459	76974	44	45
GO:0015630	microtubule cytoskeleton	cellular_component	0.98551	1	73	17754	390	76974	44	29
GO:1901659	glycosyl compound biosynthetic process	biological_process	0.9939	1	90	17754	499	76974	44	46
GO:0009163	nucleoside biosynthetic process	biological_process	0.99528	1	89	17754	498	76974	44	45
GO:0042455	ribonucleoside biosynthetic process	biological_process	0.99528	1	89	17754	498	76974	44	45
GO:0044459	plasma membrane part	cellular_component	0.99799	1	74	17754	437	76974	44	30
GO:0004190	aspartic-type endopeptidase activity	molecular_function	0.99917	1	78	17754	469	76974	44	34
GO:0070001	aspartic-type peptidase activity	molecular_function	0.99917	1	78	17754	469	76974	44	34
GO:0005516	calmodulin binding	molecular_function	0.000278	0.013197	51	17754	138	76974	43	8
GO:0009892	negative regulation of metabolic process	biological_process	0.008181	0.17781	95	17754	328	76974	43	52
GO:0048869	cellular developmental process	biological_process	0.24895	1	85	17754	345	76974	43	42
GO:0032940	secretion by cell	biological_process	0.83493	1	71	17754	336	76974	43	28
GO:0046903	secretion	biological_process	0.85959	1	71	17754	340	76974	43	28
GO:0000776	kinetochore	cellular_component	0.92091	1	65	17754	326	76974	43	22
GO:0015988	energy coupled proton transmembrane transport, against electrochemical gradient	biological_process	0.98918	1	80	17754	433	76974	43	37
GO:0015991	ATP hydrolysis coupled proton transport	biological_process	0.98918	1	80	17754	433	76974	43	37
GO:0009607	response to biotic stimulus	biological_process	0.9909	1	76	17754	442	76974	43	33
GO:0015631	tubulin binding	molecular_function	0.99404	1	90	17754	480	76974	43	47
GO:0044432	endoplasmic reticulum part	cellular_component	0.9942	1	85	17754	479	76974	43	42
GO:0051536	iron-sulfur cluster binding	molecular_function	0.064507	0.60585	86	17754	324	76974	42	44
GO:0051540	metal cluster binding	molecular_function	0.064507	0.60585	86	17754	324	76974	42	44
GO:0016628	oxidoreductase activity, acting on the CH-CH group of donors, NAD or NADP as acceptor	molecular_function	0.064845	0.60781	71	17754	262	76974	42	29
GO:0048870	cell motility	biological_process	0.11871	0.85766	74	17754	281	76974	42	32
GO:0051674	localization of cell	biological_process	0.11871	0.85766	74	17754	281	76974	42	32
GO:0060589	nucleoside-triphosphatase regulator activity	molecular_function	0.33543	1	79	17754	330	76974	42	37
GO:0044448	cell cortex part	cellular_component	0.35543	1	66	17754	269	76974	42	24
GO:0005938	cell cortex	cellular_component	0.37947	1	67	17754	275	76974	42	25
GO:0030133	transport vesicle	cellular_component	0.5166	1	64	17754	273	76974	42	22
GO:0098798	mitochondrial protein complex	cellular_component	0.63812	1	71	17754	327	76974	42	29
GO:0016568	chromatin modification	biological_process	0.71983	1	64	17754	298	76974	42	22
GO:0070972	protein localization to endoplasmic reticulum	biological_process	0.95767	1	56	17754	299	76974	42	14
GO:0051246	regulation of protein metabolic process	biological_process	0.97089	1	109	17754	544	76974	42	67
GO:0016485	protein processing	biological_process	0.97813	1	87	17754	462	76974	42	45
GO:0051604	protein maturation	biological_process	0.97813	1	87	17754	462	76974	42	45
GO:0071949	FAD binding	molecular_function	3.24e-05	0.001969	116	17754	355	76974	41	75
GO:0010605	negative regulation of macromolecule metabolic process	biological_process	0.007284	0.16605	90	17754	306	76974	41	49
GO:0009579	thylakoid	cellular_component	0.36564	1	99	17754	441	76974	41	58
GO:0044436	thylakoid part	cellular_component	0.36564	1	99	17754	441	76974	41	58
GO:0034357	photosynthetic membrane	cellular_component	0.3764	1	96	17754	429	76974	41	55
GO:0005996	monosaccharide metabolic process	biological_process	0.77008	1	71	17754	330	76974	41	30
GO:0016311	dephosphorylation	biological_process	0.002353	0.07417	57	17754	174	76974	40	17
GO:0004180	carboxypeptidase activity	molecular_function	0.022173	0.32103	84	17754	298	76974	40	44
GO:0006364	rRNA processing	biological_process	0.046757	0.51908	75	17754	273	76974	40	35
GO:0016072	rRNA metabolic process	biological_process	0.046757	0.51908	75	17754	273	76974	40	35
GO:0065004	protein-DNA complex assembly	biological_process	0.13174	0.89729	64	17754	247	76974	40	24
GO:0071824	protein-DNA complex subunit organization	biological_process	0.13174	0.89729	64	17754	247	76974	40	24
GO:0016759	cellulose synthase activity	molecular_function	0.38803	1	66	17754	270	76974	40	26
GO:0016760	cellulose synthase (UDP-forming) activity	molecular_function	0.38803	1	66	17754	270	76974	40	26
GO:0043566	structure-specific DNA binding	molecular_function	0.39307	1	89	17754	371	76974	40	49
GO:0031683	G-protein beta/gamma-subunit complex binding	molecular_function	0.58181	1	61	17754	271	76974	40	21
GO:0005984	disaccharide metabolic process	biological_process	0.79843	1	65	17754	303	76974	40	25
GO:0004185	serine-type carboxypeptidase activity	molecular_function	0.006763	0.15645	82	17754	277	76974	39	43
GO:0003857	3-hydroxyacyl-CoA dehydrogenase activity	molecular_function	0.017475	0.27574	74	17754	255	76974	39	35
GO:0004857	enzyme inhibitor activity	molecular_function	0.064116	0.60556	78	17754	300	76974	39	39
GO:0000160	phosphorelay signal transduction system	biological_process	0.095256	0.74803	85	17754	321	76974	39	46
GO:0009653	anatomical structure morphogenesis	biological_process	0.23863	1	75	17754	304	76974	39	36
GO:0015103	inorganic anion transmembrane transporter activity	molecular_function	0.24446	1	72	17754	284	76974	39	33
GO:0016810	hydrolase activity, acting on carbon-nitrogen (but not peptide) bonds	molecular_function	0.40942	1	62	17754	264	76974	39	23
GO:0009893	positive regulation of metabolic process	biological_process	0.97	1	68	17754	356	76974	39	29
GO:0032268	regulation of cellular protein metabolic process	biological_process	0.98073	1	105	17754	533	76974	39	66
GO:0033177	proton-transporting two-sector ATPase complex, proton-transporting domain	cellular_component	0.98907	1	71	17754	393	76974	39	32
GO:0006644	phospholipid metabolic process	biological_process	0.99636	1	70	17754	401	76974	39	31
GO:0061695	transferase complex, transferring phosphorus-containing groups	cellular_component	0.99996	1	68	17754	441	76974	39	29
GO:0009308	amine metabolic process	biological_process	0.098915	0.76777	84	17754	319	76974	38	46
GO:0016836	hydro-lyase activity	molecular_function	0.3623	1	68	17754	282	76974	38	30
GO:0009521	photosystem	cellular_component	0.40695	1	89	17754	401	76974	38	51
GO:0005743	mitochondrial inner membrane	cellular_component	0.67158	1	66	17754	308	76974	38	28
GO:0009312	oligosaccharide biosynthetic process	biological_process	0.71893	1	52	17754	241	76974	38	14
GO:0019866	organelle inner membrane	cellular_component	0.74138	1	67	17754	319	76974	38	29
GO:0005507	copper ion binding	molecular_function	0.81375	1	67	17754	318	76974	38	29
GO:0045047	protein targeting to ER	biological_process	0.94067	1	51	17754	269	76974	38	13
GO:0072599	establishment of protein localization to endoplasmic reticulum	biological_process	0.94067	1	51	17754	269	76974	38	13
GO:0006612	protein targeting to membrane	biological_process	0.9471	1	51	17754	271	76974	38	13
GO:0033176	proton-transporting V-type ATPase complex	cellular_component	0.98081	1	73	17754	388	76974	38	35
GO:0005789	endoplasmic reticulum membrane	cellular_component	0.99622	1	79	17754	456	76974	38	41
GO:0042175	nuclear outer membrane-endoplasmic reticulum membrane network	cellular_component	0.99758	1	79	17754	462	76974	38	41
GO:0016407	acetyltransferase activity	molecular_function	0.003002	0.09037	67	17754	218	76974	37	30
GO:0006470	protein dephosphorylation	biological_process	0.003894	0.10448	53	17754	163	76974	37	16
GO:0016410	N-acyltransferase activity	molecular_function	0.007696	0.17291	67	17754	224	76974	37	30
GO:0004721	phosphoprotein phosphatase activity	molecular_function	0.011678	0.21762	50	17754	160	76974	37	13
GO:1901681	sulfur compound binding	molecular_function	0.013002	0.22959	56	17754	183	76974	37	19
GO:0006865	amino acid transport	biological_process	0.37466	1	61	17754	254	76974	37	24
GO:0006887	exocytosis	biological_process	0.5361	1	58	17754	247	76974	37	21
GO:0004527	exonuclease activity	molecular_function	0.70264	1	72	17754	328	76974	37	35
GO:0030658	transport vesicle membrane	cellular_component	0.73646	1	56	17754	255	76974	37	19
GO:0009894	regulation of catabolic process	biological_process	0.88485	1	67	17754	326	76974	37	30
GO:0000228	nuclear chromosome	cellular_component	0.89943	1	60	17754	300	76974	37	23
GO:0006613	cotranslational protein targeting to membrane	biological_process	0.94414	1	50	17754	265	76974	37	13
GO:0006614	SRP-dependent cotranslational protein targeting to membrane	biological_process	0.94414	1	50	17754	265	76974	37	13
GO:0032259	methylation	biological_process	0.99886	1	76	17754	450	76974	37	39
GO:0009719	response to endogenous stimulus	biological_process	6.94e-05	0.003832	75	17754	219	76974	36	39
GO:0070840	dynein complex binding	molecular_function	0.055808	0.57603	71	17754	257	76974	36	35
GO:0006888	ER to Golgi vesicle-mediated transport	biological_process	0.77266	1	55	17754	255	76974	36	19
GO:0019318	hexose metabolic process	biological_process	0.88147	1	61	17754	299	76974	36	25
GO:0031325	positive regulation of cellular metabolic process	biological_process	0.9733	1	64	17754	339	76974	36	28
GO:0003774	motor activity	molecular_function	0.9777	1	63	17754	331	76974	36	27
GO:0009725	response to hormone	biological_process	3.06e-05	0.001913	74	17754	211	76974	35	39
GO:0008080	N-acetyltransferase activity	molecular_function	0.001111	0.040773	64	17754	198	76974	35	29
GO:0005543	phospholipid binding	molecular_function	0.052593	0.56003	61	17754	216	76974	35	26
GO:0030312	external encapsulating structure	cellular_component	0.098359	0.76677	74	17754	281	76974	35	39
GO:0034508	centromere complex assembly	biological_process	0.25756	1	50	17754	200	76974	35	15
GO:0019079	viral genome replication	biological_process	0.31107	1	56	17754	224	76974	35	21
GO:0019954	asexual reproduction	biological_process	0.52792	1	58	17754	258	76974	35	23
GO:0005615	extracellular space	cellular_component	0.8446	1	63	17754	303	76974	35	28
GO:0009405	pathogenesis	biological_process	0.99923	1	74	17754	456	76974	35	39
GO:0045229	external encapsulating structure organization	biological_process	0.005309	0.13104	58	17754	184	76974	34	24
GO:0000902	cell morphogenesis	biological_process	0.057639	0.5796	66	17754	239	76974	34	32
GO:0032989	cellular component morphogenesis	biological_process	0.057639	0.5796	66	17754	239	76974	34	32
GO:0051382	kinetochore assembly	biological_process	0.1583	0.9758	49	17754	186	76974	34	15
GO:0051383	kinetochore organization	biological_process	0.1583	0.9758	49	17754	186	76974	34	15
GO:0008380	RNA splicing	biological_process	0.79121	1	55	17754	262	76974	34	21
GO:0012507	ER to Golgi transport vesicle membrane	cellular_component	0.82937	1	50	17754	237	76974	34	16
GO:0030127	COPII vesicle coat	cellular_component	0.82937	1	50	17754	237	76974	34	16
GO:0030134	ER to Golgi transport vesicle	cellular_component	0.82937	1	50	17754	237	76974	34	16
GO:0031329	regulation of cellular catabolic process	biological_process	0.92243	1	63	17754	315	76974	34	29
GO:0051258	protein polymerization	biological_process	0.98357	1	60	17754	325	76974	34	26
GO:0004519	endonuclease activity	molecular_function	0.9937	1	67	17754	381	76974	34	33
GO:0006261	DNA-dependent DNA replication	biological_process	0.99797	1	80	17754	476	76974	34	46
GO:0007059	chromosome segregation	biological_process	0.99976	1	49	17754	320	76974	34	15
GO:0008138	protein tyrosine/serine/threonine phosphatase activity	molecular_function	0.003441	0.099132	44	17754	129	76974	33	11
GO:0030684	preribosome	cellular_component	0.03622	0.44294	70	17754	248	76974	33	37
GO:0000910	cytokinesis	biological_process	0.3471	1	54	17754	222	76974	33	21
GO:1903825	organic acid transmembrane transport	biological_process	0.35054	1	55	17754	226	76974	33	22
GO:0098656	anion transmembrane transport	biological_process	0.36461	1	55	17754	227	76974	33	22
GO:0004616	phosphogluconate dehydrogenase (decarboxylating) activity	molecular_function	0.37004	1	51	17754	211	76974	33	18
GO:0048285	organelle fission	biological_process	0.86465	1	49	17754	245	76974	33	16
GO:0044454	nuclear chromosome part	cellular_component	0.94834	1	51	17754	269	76974	33	18
GO:0004540	ribonuclease activity	molecular_function	0.99779	1	58	17754	344	76974	33	25
GO:0006357	regulation of transcription from RNA polymerase II promoter	biological_process	0.99948	1	49	17754	321	76974	33	16
GO:0065009	regulation of molecular function	biological_process	0.051619	0.55217	62	17754	224	76974	32	30
GO:0003333	amino acid transmembrane transport	biological_process	0.36073	1	54	17754	222	76974	32	22
GO:0032506	cytokinetic process	biological_process	0.39459	1	52	17754	217	76974	32	20
GO:0090529	cell septum assembly	biological_process	0.39459	1	52	17754	217	76974	32	20
GO:0018193	peptidyl-amino acid modification	biological_process	0.48972	1	67	17754	295	76974	32	35
GO:0006270	DNA replication initiation	biological_process	0.78498	1	74	17754	347	76974	32	42
GO:0034061	DNA polymerase activity	molecular_function	0.85252	1	61	17754	293	76974	32	29
GO:0017038	protein import	biological_process	0.95067	1	66	17754	339	76974	32	34
GO:0016831	carboxy-lyase activity	molecular_function	0.99879	1	72	17754	426	76974	32	40
GO:0031324	negative regulation of cellular metabolic process	biological_process	0.004121	0.10997	73	17754	237	76974	31	42
GO:0015947	methane metabolic process	biological_process	0.006417	0.14993	43	17754	130	76974	31	12
GO:0043446	cellular alkane metabolic process	biological_process	0.006417	0.14993	43	17754	130	76974	31	12
GO:0006547	histidine metabolic process	biological_process	0.010599	0.20853	52	17754	168	76974	31	21
GO:0052803	imidazole-containing compound metabolic process	biological_process	0.010599	0.20853	52	17754	168	76974	31	21
GO:0071555	cell wall organization	biological_process	0.012757	0.22778	55	17754	180	76974	31	24
GO:0016620	oxidoreductase activity, acting on the aldehyde or oxo group of donors, NAD or NADP as acceptor	molecular_function	0.014793	0.24634	54	17754	180	76974	31	23
GO:0010876	lipid localization	biological_process	0.02042	0.30933	61	17754	210	76974	31	30
GO:0016638	oxidoreductase activity, acting on the CH-NH2 group of donors	molecular_function	0.20658	1	63	17754	247	76974	31	32
GO:0098800	inner mitochondrial membrane protein complex	cellular_component	0.37202	1	53	17754	228	76974	31	22
GO:0016684	oxidoreductase activity, acting on peroxide as acceptor	molecular_function	0.41115	1	59	17754	254	76974	31	28
GO:0043414	macromolecule methylation	biological_process	0.99835	1	60	17754	366	76974	31	29
GO:0010629	negative regulation of gene expression	biological_process	0.005612	0.13655	69	17754	223	76974	30	39
GO:0015948	methanogenesis	biological_process	0.0094	0.19026	42	17754	129	76974	30	12
GO:0015975	energy derivation by oxidation of reduced inorganic compounds	biological_process	0.0094	0.19026	42	17754	129	76974	30	12
GO:0043447	alkane biosynthetic process	biological_process	0.0094	0.19026	42	17754	129	76974	30	12
GO:0006869	lipid transport	biological_process	0.010275	0.2062	59	17754	196	76974	30	29
GO:0009061	anaerobic respiration	biological_process	0.010613	0.20853	42	17754	130	76974	30	12
GO:0000105	histidine biosynthetic process	biological_process	0.02939	0.39557	48	17754	162	76974	30	18
GO:0000139	Golgi membrane	cellular_component	0.17826	1	45	17754	170	76974	30	15
GO:0019842	vitamin binding	molecular_function	0.21938	1	43	17754	164	76974	30	13
GO:0006779	porphyrin-containing compound biosynthetic process	biological_process	0.26621	1	52	17754	206	76974	30	22
GO:0008643	carbohydrate transport	biological_process	0.34191	1	42	17754	177	76974	30	12
GO:0043093	FtsZ-dependent cytokinesis	biological_process	0.35603	1	50	17754	206	76974	30	20
GO:0032505	reproduction of a single-celled organism	biological_process	0.37094	1	50	17754	207	76974	30	20
GO:0009072	aromatic amino acid family metabolic process	biological_process	0.48258	1	38	17754	161	76974	30	8
GO:0015074	DNA integration	biological_process	0.55061	1	61	17754	261	76974	30	31
GO:0015079	potassium ion transmembrane transporter activity	molecular_function	0.6137	1	46	17754	204	76974	30	16
GO:0000375	RNA splicing, via transesterification reactions	biological_process	0.6592	1	43	17754	197	76974	30	13
GO:0000280	nuclear division	biological_process	0.79621	1	44	17754	211	76974	30	14
GO:0030674	protein binding, bridging	molecular_function	0.80202	1	45	17754	215	76974	30	15
GO:0060090	binding, bridging	molecular_function	0.80202	1	45	17754	215	76974	30	15
GO:0004888	transmembrane signaling receptor activity	molecular_function	1	1	48	17754	364	76974	30	18
GO:0000502	proteasome complex	cellular_component	0.000108	0.00565	57	17754	162	76974	29	28
GO:0005618	cell wall	cellular_component	0.019689	0.30415	57	17754	193	76974	29	28
GO:0032040	small-subunit processome	cellular_component	0.041142	0.48644	61	17754	214	76974	29	32
GO:0008219	cell death	biological_process	0.092704	0.74037	49	17754	178	76974	29	20
GO:0016265	death	biological_process	0.092704	0.74037	49	17754	178	76974	29	20
GO:0008171	O-methyltransferase activity	molecular_function	0.099841	0.76781	50	17754	188	76974	29	21
GO:0046148	pigment biosynthetic process	biological_process	0.13543	0.89951	50	17754	186	76974	29	21
GO:0006576	cellular biogenic amine metabolic process	biological_process	0.37537	1	57	17754	237	76974	29	28
GO:0044106	cellular amine metabolic process	biological_process	0.37537	1	57	17754	237	76974	29	28
GO:0000145	exocyst	cellular_component	0.37551	1	44	17754	177	76974	29	15
GO:0004601	peroxidase activity	molecular_function	0.42154	1	57	17754	246	76974	29	28
GO:0005815	microtubule organizing center	cellular_component	0.61571	1	47	17754	207	76974	29	18
GO:0010506	regulation of autophagy	biological_process	0.6895	1	57	17754	258	76974	29	28
GO:0072509	divalent inorganic cation transmembrane transporter activity	molecular_function	0.72057	1	50	17754	233	76974	29	21
GO:0016667	oxidoreductase activity, acting on a sulfur group of donors	molecular_function	0.76493	1	41	17754	204	76974	29	12
GO:0008654	phospholipid biosynthetic process	biological_process	0.97933	1	54	17754	300	76974	29	25
GO:0044724	single-organism carbohydrate catabolic process	biological_process	0.080526	0.68964	65	17754	239	76974	28	37
GO:0006915	apoptotic process	biological_process	0.12537	0.88003	47	17754	174	76974	28	19
GO:0012501	programmed cell death	biological_process	0.12537	0.88003	47	17754	174	76974	28	19
GO:0043648	dicarboxylic acid metabolic process	biological_process	0.17135	1	58	17754	226	76974	28	30
GO:0042157	lipoprotein metabolic process	biological_process	0.17675	1	69	17754	275	76974	28	41
GO:0009523	photosystem II	cellular_component	0.17989	1	69	17754	290	76974	28	41
GO:0016765	transferase activity, transferring alkyl or aryl (other than methyl) groups	molecular_function	0.31528	1	53	17754	213	76974	28	25
GO:0003743	translation initiation factor activity	molecular_function	0.57111	1	48	17754	215	76974	28	20
GO:0005261	cation channel activity	molecular_function	0.94608	1	43	17754	234	76974	28	15
GO:0009156	ribonucleoside monophosphate biosynthetic process	biological_process	0.94848	1	60	17754	317	76974	28	32
GO:0009124	nucleoside monophosphate biosynthetic process	biological_process	0.95156	1	60	17754	318	76974	28	32
GO:0006575	cellular modified amino acid metabolic process	biological_process	0.98022	1	49	17754	270	76974	28	21
GO:0004725	protein tyrosine phosphatase activity	molecular_function	0.011595	0.21762	38	17754	116	76974	27	11
GO:0004497	monooxygenase activity	molecular_function	0.05412	0.56856	63	17754	225	76974	27	36
GO:0006090	pyruvate metabolic process	biological_process	0.075208	0.66949	60	17754	218	76974	27	33
GO:0006783	heme biosynthetic process	biological_process	0.095083	0.74803	47	17754	169	76974	27	20
GO:0042168	heme metabolic process	biological_process	0.12643	0.88222	48	17754	177	76974	27	21
GO:0030976	thiamine pyrophosphate binding	molecular_function	0.15354	0.96085	36	17754	130	76974	27	9
GO:0016597	amino acid binding	molecular_function	0.1576	0.97511	59	17754	224	76974	27	32
GO:0031406	carboxylic acid binding	molecular_function	0.20612	1	59	17754	229	76974	27	32
GO:0043177	organic acid binding	molecular_function	0.20612	1	59	17754	229	76974	27	32
GO:0006165	nucleoside diphosphate phosphorylation	biological_process	0.21585	1	61	17754	241	76974	27	34
GO:0009132	nucleoside diphosphate metabolic process	biological_process	0.21585	1	61	17754	241	76974	27	34
GO:0046939	nucleotide phosphorylation	biological_process	0.21585	1	61	17754	241	76974	27	34
GO:0007005	mitochondrion organization	biological_process	0.57114	1	54	17754	239	76974	27	27
GO:0030695	GTPase regulator activity	molecular_function	0.60531	1	45	17754	198	76974	27	18
GO:0004673	protein histidine kinase activity	molecular_function	0.89382	1	52	17754	257	76974	27	25
GO:0016775	phosphotransferase activity, nitrogenous group as acceptor	molecular_function	0.89382	1	52	17754	257	76974	27	25
GO:0009127	purine nucleoside monophosphate biosynthetic process	biological_process	0.94276	1	59	17754	310	76974	27	32
GO:0009168	purine ribonucleoside monophosphate biosynthetic process	biological_process	0.94276	1	59	17754	310	76974	27	32
GO:0005057	receptor signaling protein activity	molecular_function	0.94522	1	47	17754	243	76974	27	20
GO:0000793	condensed chromosome	cellular_component	0.96686	1	47	17754	253	76974	27	20
GO:0051128	regulation of cellular component organization	biological_process	0.99702	1	42	17754	261	76974	27	15
GO:0000428	DNA-directed RNA polymerase complex	cellular_component	0.99998	1	48	17754	341	76974	27	21
GO:0030880	RNA polymerase complex	cellular_component	0.99998	1	48	17754	341	76974	27	21
GO:0055029	nuclear DNA-directed RNA polymerase complex	cellular_component	0.99998	1	48	17754	341	76974	27	21
GO:0033865	nucleoside bisphosphate metabolic process	biological_process	0.027216	0.37479	51	17754	170	76974	26	25
GO:0033875	ribonucleoside bisphosphate metabolic process	biological_process	0.027216	0.37479	51	17754	170	76974	26	25
GO:0034032	purine nucleoside bisphosphate metabolic process	biological_process	0.027216	0.37479	51	17754	170	76974	26	25
GO:0006096	glycolytic process	biological_process	0.081065	0.68964	59	17754	215	76974	26	33
GO:0006757	ATP generation from ADP	biological_process	0.081065	0.68964	59	17754	215	76974	26	33
GO:0009135	purine nucleoside diphosphate metabolic process	biological_process	0.081065	0.68964	59	17754	215	76974	26	33
GO:0009179	purine ribonucleoside diphosphate metabolic process	biological_process	0.081065	0.68964	59	17754	215	76974	26	33
GO:0009185	ribonucleoside diphosphate metabolic process	biological_process	0.081065	0.68964	59	17754	215	76974	26	33
GO:0046031	ADP metabolic process	biological_process	0.081065	0.68964	59	17754	215	76974	26	33
GO:0048583	regulation of response to stimulus	biological_process	0.15106	0.95625	61	17754	234	76974	26	35
GO:0006313	transposition, DNA-mediated	biological_process	0.5793	1	49	17754	213	76974	26	23
GO:0032196	transposition	biological_process	0.5793	1	49	17754	213	76974	26	23
GO:0000377	RNA splicing, via transesterification reactions with bulged adenosine as nucleophile	biological_process	0.69354	1	34	17754	160	76974	26	8
GO:0000398	mRNA splicing, via spliceosome	biological_process	0.69354	1	34	17754	160	76974	26	8
GO:0009066	aspartate family amino acid metabolic process	biological_process	0.71627	1	49	17754	226	76974	26	23
GO:0036459	ubiquitinyl hydrolase activity	molecular_function	0.77205	1	54	17754	249	76974	26	28
GO:0031300	intrinsic component of organelle membrane	cellular_component	0.86612	1	48	17754	245	76974	26	22
GO:0031301	integral component of organelle membrane	cellular_component	0.86612	1	48	17754	245	76974	26	22
GO:0007155	cell adhesion	biological_process	0.9838	1	55	17754	302	76974	26	29
GO:0022610	biological adhesion	biological_process	0.99365	1	55	17754	314	76974	26	29
GO:0008017	microtubule binding	molecular_function	0.99693	1	60	17754	344	76974	26	34
GO:0015629	actin cytoskeleton	cellular_component	0.99702	1	38	17754	235	76974	26	12
GO:0000226	microtubule cytoskeleton organization	biological_process	0.9987	1	46	17754	285	76974	26	20
GO:0006720	isoprenoid metabolic process	biological_process	7.95e-05	0.004343	59	17754	161	76974	25	34
GO:0015994	chlorophyll metabolic process	biological_process	0.006055	0.14472	43	17754	132	76974	25	18
GO:0004427	inorganic diphosphatase activity	molecular_function	0.035158	0.44294	37	17754	120	76974	25	12
GO:0015144	carbohydrate transmembrane transporter activity	molecular_function	0.11308	0.82972	37	17754	138	76974	25	12
GO:1901476	carbohydrate transporter activity	molecular_function	0.11308	0.82972	37	17754	138	76974	25	12
GO:0050661	NADP binding	molecular_function	0.11473	0.83958	44	17754	159	76974	25	19
GO:0050790	regulation of catalytic activity	biological_process	0.21095	1	49	17754	193	76974	25	24
GO:0003690	double-stranded DNA binding	molecular_function	0.26067	1	73	17754	291	76974	25	48
GO:0071804	cellular potassium ion transport	biological_process	0.27768	1	39	17754	152	76974	25	14
GO:0071805	potassium ion transmembrane transport	biological_process	0.27768	1	39	17754	152	76974	25	14
GO:0016866	intramolecular transferase activity	molecular_function	0.31929	1	50	17754	204	76974	25	25
GO:0015298	solute:cation antiporter activity	molecular_function	0.48247	1	43	17754	180	76974	25	18
GO:0015299	solute:proton antiporter activity	molecular_function	0.48247	1	43	17754	180	76974	25	18
GO:0051726	regulation of cell cycle	biological_process	0.55324	1	44	17754	196	76974	25	19
GO:0006979	response to oxidative stress	biological_process	0.61368	1	50	17754	235	76974	25	25
GO:0004803	transposase activity	molecular_function	0.61668	1	46	17754	202	76974	25	21
GO:0016893	endonuclease activity, active with either ribo- or deoxyribonucleic acids and producing 5'-phosphomonoesters	molecular_function	0.73307	1	44	17754	206	76974	25	19
GO:0008514	organic anion transmembrane transporter activity	molecular_function	0.88901	1	45	17754	230	76974	25	20
GO:0005741	mitochondrial outer membrane	cellular_component	0.92483	1	46	17754	240	76974	25	21
GO:0031968	organelle outer membrane	cellular_component	0.92483	1	46	17754	240	76974	25	21
GO:0000155	phosphorelay sensor kinase activity	molecular_function	0.96684	1	41	17754	221	76974	25	16
GO:0098813	nuclear chromosome segregation	biological_process	0.98214	1	38	17754	218	76974	25	13
GO:0015276	ligand-gated ion channel activity	molecular_function	0.98802	1	39	17754	229	76974	25	14
GO:0022834	ligand-gated channel activity	molecular_function	0.98802	1	39	17754	229	76974	25	14
GO:0009142	nucleoside triphosphate biosynthetic process	biological_process	0.99519	1	50	17754	301	76974	25	25
GO:0009145	purine nucleoside triphosphate biosynthetic process	biological_process	0.99519	1	50	17754	301	76974	25	25
GO:0009201	ribonucleoside triphosphate biosynthetic process	biological_process	0.99519	1	50	17754	301	76974	25	25
GO:0009206	purine ribonucleoside triphosphate biosynthetic process	biological_process	0.99519	1	50	17754	301	76974	25	25
GO:0016591	DNA-directed RNA polymerase II, holoenzyme	cellular_component	0.99948	1	43	17754	282	76974	25	18
GO:0015996	chlorophyll catabolic process	biological_process	0.002641	0.082125	42	17754	123	76974	24	18
GO:0047746	chlorophyllase activity	molecular_function	0.002641	0.082125	42	17754	123	76974	24	18
GO:0046149	pigment catabolic process	biological_process	0.00361	0.099969	42	17754	125	76974	24	18
GO:0006787	porphyrin-containing compound catabolic process	biological_process	0.005307	0.13104	43	17754	131	76974	24	19
GO:0033015	tetrapyrrole catabolic process	biological_process	0.005307	0.13104	43	17754	131	76974	24	19
GO:0051187	cofactor catabolic process	biological_process	0.006188	0.14677	43	17754	132	76974	24	19
GO:0006855	drug transmembrane transport	biological_process	0.008254	0.17781	59	17754	189	76974	24	35
GO:0015238	drug transmembrane transporter activity	molecular_function	0.008254	0.17781	59	17754	189	76974	24	35
GO:0015893	drug transport	biological_process	0.008254	0.17781	59	17754	189	76974	24	35
GO:0090484	drug transporter activity	molecular_function	0.008254	0.17781	59	17754	189	76974	24	35
GO:0042493	response to drug	biological_process	0.010467	0.20853	59	17754	191	76974	24	35
GO:1901136	carbohydrate derivative catabolic process	biological_process	0.014914	0.2474	49	17754	160	76974	24	25
GO:0010941	regulation of cell death	biological_process	0.1513	0.95625	41	17754	152	76974	24	17
GO:0042981	regulation of apoptotic process	biological_process	0.1513	0.95625	41	17754	152	76974	24	17
GO:0043067	regulation of programmed cell death	biological_process	0.1513	0.95625	41	17754	152	76974	24	17
GO:0004536	deoxyribonuclease activity	molecular_function	0.19929	1	51	17754	199	76974	24	27
GO:0042393	histone binding	molecular_function	0.24894	1	31	17754	117	76974	24	7
GO:0009067	aspartate family amino acid biosynthetic process	biological_process	0.49553	1	44	17754	189	76974	24	20
GO:0031514	motile cilium	cellular_component	0.5834	1	44	17754	192	76974	24	20
GO:0005929	cilium	cellular_component	0.62288	1	44	17754	195	76974	24	20
GO:0004197	cysteine-type endopeptidase activity	molecular_function	0.68828	1	36	17754	168	76974	24	12
GO:0019898	extrinsic component of membrane	cellular_component	0.81961	1	55	17754	270	76974	24	31
GO:0016796	exonuclease activity, active with either ribo- or deoxyribonucleic acids and producing 5'-phosphomonoesters	molecular_function	0.83832	1	44	17754	217	76974	24	20
GO:0046351	disaccharide biosynthetic process	biological_process	0.88309	1	30	17754	155	76974	24	6
GO:0016569	covalent chromatin modification	biological_process	0.91608	1	36	17754	189	76974	24	12
GO:0016570	histone modification	biological_process	0.91608	1	36	17754	189	76974	24	12
GO:0003887	DNA-directed DNA polymerase activity	molecular_function	0.97074	1	48	17754	259	76974	24	24
GO:0010608	posttranscriptional regulation of gene expression	biological_process	0.9835	1	73	17754	382	76974	24	49
GO:0006913	nucleocytoplasmic transport	biological_process	0.98418	1	49	17754	273	76974	24	25
GO:0006754	ATP biosynthetic process	biological_process	0.9843	1	48	17754	275	76974	24	24
GO:0051169	nuclear transport	biological_process	0.98854	1	49	17754	277	76974	24	25
GO:0008565	protein transporter activity	molecular_function	0.99324	1	48	17754	287	76974	24	24
GO:0016592	mediator complex	cellular_component	0.99988	1	37	17754	271	76974	24	13
GO:0001076	transcription factor activity, RNA polymerase II transcription factor binding	molecular_function	0.99992	1	36	17754	269	76974	24	12
GO:0001104	RNA polymerase II transcription cofactor activity	molecular_function	0.99992	1	36	17754	269	76974	24	12
GO:0019354	siroheme biosynthetic process	biological_process	0.088372	0.72047	40	17754	141	76974	23	17
GO:0043115	precorrin-2 dehydrogenase activity	molecular_function	0.088372	0.72047	40	17754	141	76974	23	17
GO:0046156	siroheme metabolic process	biological_process	0.088372	0.72047	40	17754	141	76974	23	17
GO:0019205	nucleobase-containing compound kinase activity	molecular_function	0.50292	1	46	17754	198	76974	23	23
GO:0006006	glucose metabolic process	biological_process	0.56888	1	38	17754	165	76974	23	15
GO:0016579	protein deubiquitination	biological_process	0.5756	1	50	17754	215	76974	23	27
GO:0070646	protein modification by small protein removal	biological_process	0.5756	1	50	17754	215	76974	23	27
GO:0005991	trehalose metabolic process	biological_process	0.59283	1	43	17754	190	76974	23	20
GO:0006790	sulfur compound metabolic process	biological_process	0.67245	1	38	17754	172	76974	23	15
GO:0005342	organic acid transmembrane transporter activity	molecular_function	0.81846	1	42	17754	208	76974	23	19
GO:0046943	carboxylic acid transmembrane transporter activity	molecular_function	0.81846	1	42	17754	208	76974	23	19
GO:0005992	trehalose biosynthetic process	biological_process	0.89206	1	27	17754	142	76974	23	4
GO:0005577	fibrinogen complex	cellular_component	0.89932	1	38	17754	194	76974	23	15
GO:0030168	platelet activation	biological_process	0.89932	1	38	17754	194	76974	23	15
GO:0033179	proton-transporting V-type ATPase, V0 domain	cellular_component	0.9183	1	42	17754	216	76974	23	19
GO:0007596	blood coagulation	biological_process	0.93825	1	38	17754	201	76974	23	15
GO:0007599	hemostasis	biological_process	0.93825	1	38	17754	201	76974	23	15
GO:0050817	coagulation	biological_process	0.93825	1	38	17754	201	76974	23	15
GO:0050878	regulation of body fluid levels	biological_process	0.93825	1	38	17754	201	76974	23	15
GO:0042060	wound healing	biological_process	0.96643	1	39	17754	214	76974	23	16
GO:0001775	cell activation	biological_process	0.97278	1	40	17754	222	76974	23	17
GO:0006367	transcription initiation from RNA polymerase II promoter	biological_process	0.97401	1	42	17754	232	76974	23	19
GO:0009611	response to wounding	biological_process	0.97429	1	39	17754	218	76974	23	16
GO:0098797	plasma membrane protein complex	cellular_component	0.9997	1	35	17754	254	76974	23	12
GO:0008299	isoprenoid biosynthetic process	biological_process	0.000122	0.006305	55	17754	149	76974	22	33
GO:0010558	negative regulation of macromolecule biosynthetic process	biological_process	0.000639	0.026335	56	17754	161	76974	22	34
GO:0031327	negative regulation of cellular biosynthetic process	biological_process	0.000639	0.026335	56	17754	161	76974	22	34
GO:0051172	negative regulation of nitrogen compound metabolic process	biological_process	0.000639	0.026335	56	17754	161	76974	22	34
GO:2000113	negative regulation of cellular macromolecule biosynthetic process	biological_process	0.000639	0.026335	56	17754	161	76974	22	34
GO:0009890	negative regulation of biosynthetic process	biological_process	0.000899	0.034326	56	17754	163	76974	22	34
GO:0010256	endomembrane system organization	biological_process	0.41484	1	43	17754	180	76974	22	21
GO:0003968	RNA-directed RNA polymerase activity	molecular_function	0.41907	1	33	17754	136	76974	22	11
GO:0031226	intrinsic component of plasma membrane	cellular_component	0.63302	1	40	17754	183	76974	22	18
GO:0008047	enzyme activator activity	molecular_function	0.68817	1	37	17754	168	76974	22	15
GO:0072511	divalent inorganic cation transport	biological_process	0.81679	1	36	17754	176	76974	22	14
GO:0002376	immune system process	biological_process	0.96077	1	41	17754	223	76974	22	19
GO:0015985	energy coupled proton transport, down electrochemical gradient	biological_process	0.98111	1	46	17754	263	76974	22	24
GO:0015986	ATP synthesis coupled proton transport	biological_process	0.98111	1	46	17754	263	76974	22	24
GO:0006417	regulation of translation	biological_process	0.99198	1	70	17754	378	76974	22	48
GO:0034248	regulation of cellular amide metabolic process	biological_process	0.99198	1	70	17754	378	76974	22	48
GO:0005819	spindle	cellular_component	0.99875	1	37	17754	238	76974	22	15
GO:0008757	S-adenosylmethionine-dependent methyltransferase activity	molecular_function	0.99958	1	54	17754	340	76974	22	32
GO:0008677	2-dehydropantoate 2-reductase activity	molecular_function	0.030588	0.40769	40	17754	130	76974	21	19
GO:0051259	protein oligomerization	biological_process	0.17307	1	43	17754	162	76974	21	22
GO:0008378	galactosyltransferase activity	molecular_function	0.2055	1	24	17754	87	76974	21	3
GO:0005244	voltage-gated ion channel activity	molecular_function	0.49086	1	38	17754	161	76974	21	17
GO:0022832	voltage-gated channel activity	molecular_function	0.49086	1	38	17754	161	76974	21	17
GO:0016679	oxidoreductase activity, acting on diphenols and related substances as donors	molecular_function	0.50619	1	27	17754	119	76974	21	6
GO:0008408	3'-5' exonuclease activity	molecular_function	0.76544	1	40	17754	189	76974	21	19
GO:0033178	proton-transporting two-sector ATPase complex, catalytic domain	cellular_component	0.84047	1	44	17754	218	76974	21	23
GO:0071103	DNA conformation change	biological_process	0.86265	1	51	17754	250	76974	21	30
GO:0006606	protein import into nucleus	biological_process	0.87856	1	44	17754	219	76974	21	23
GO:0034504	protein localization to nucleus	biological_process	0.87856	1	44	17754	219	76974	21	23
GO:0044744	protein targeting to nucleus	biological_process	0.87856	1	44	17754	219	76974	21	23
GO:0051170	nuclear import	biological_process	0.87856	1	44	17754	219	76974	21	23
GO:1902593	single-organism nuclear import	biological_process	0.87856	1	44	17754	219	76974	21	23
GO:0034655	nucleobase-containing compound catabolic process	biological_process	0.94807	1	35	17754	190	76974	21	14
GO:0019899	enzyme binding	molecular_function	0.94854	1	52	17754	268	76974	21	31
GO:0000278	mitotic cell cycle	biological_process	0.97442	1	28	17754	164	76974	21	7
GO:1903047	mitotic cell cycle process	biological_process	0.97442	1	28	17754	164	76974	21	7
GO:0003682	chromatin binding	molecular_function	0.97469	1	35	17754	197	76974	21	14
GO:0042398	cellular modified amino acid biosynthetic process	biological_process	0.98885	1	38	17754	221	76974	21	17
GO:0043207	response to external biotic stimulus	biological_process	0.99999	1	41	17754	327	76974	21	20
GO:0051707	response to other organism	biological_process	0.99999	1	41	17754	327	76974	21	20
GO:0006739	NADP metabolic process	biological_process	0.000725	0.029332	29	17754	71	76974	20	9
GO:0009628	response to abiotic stimulus	biological_process	0.044187	0.50122	29	17754	93	76974	20	9
GO:0052646	alditol phosphate metabolic process	biological_process	0.056835	0.5796	39	17754	132	76974	20	19
GO:0008081	phosphoric diester hydrolase activity	molecular_function	0.14591	0.93475	40	17754	146	76974	20	20
GO:0019201	nucleotide kinase activity	molecular_function	0.16692	0.99474	42	17754	156	76974	20	22
GO:0006643	membrane lipid metabolic process	biological_process	0.3665	1	48	17754	204	76974	20	28
GO:0005681	spliceosomal complex	cellular_component	0.42968	1	28	17754	118	76974	20	8
GO:0009073	aromatic amino acid family biosynthetic process	biological_process	0.56899	1	25	17754	109	76974	20	5
GO:0009110	vitamin biosynthetic process	biological_process	0.59602	1	48	17754	214	76974	20	28
GO:0042364	water-soluble vitamin biosynthetic process	biological_process	0.59602	1	48	17754	214	76974	20	28
GO:0006766	vitamin metabolic process	biological_process	0.63842	1	48	17754	217	76974	20	28
GO:0006767	water-soluble vitamin metabolic process	biological_process	0.63842	1	48	17754	217	76974	20	28
GO:0000272	polysaccharide catabolic process	biological_process	0.64652	1	30	17754	137	76974	20	10
GO:0016879	ligase activity, forming carbon-nitrogen bonds	molecular_function	0.67921	1	60	17754	269	76974	20	40
GO:0061630	ubiquitin protein ligase activity	molecular_function	0.68762	1	39	17754	177	76974	20	19
GO:0061659	ubiquitin-like protein ligase activity	molecular_function	0.68762	1	39	17754	177	76974	20	19
GO:0005887	integral component of plasma membrane	cellular_component	0.69976	1	37	17754	174	76974	20	17
GO:0015171	amino acid transmembrane transporter activity	molecular_function	0.81497	1	35	17754	172	76974	20	15
GO:0006814	sodium ion transport	biological_process	0.89906	1	35	17754	188	76974	20	15
GO:0008375	acetylglucosaminyltransferase activity	molecular_function	0.90668	1	29	17754	151	76974	20	9
GO:0004521	endoribonuclease activity	molecular_function	0.93775	1	38	17754	203	76974	20	18
GO:0009896	positive regulation of catabolic process	biological_process	0.98328	1	36	17754	207	76974	20	16
GO:0010508	positive regulation of autophagy	biological_process	0.98328	1	36	17754	207	76974	20	16
GO:0031331	positive regulation of cellular catabolic process	biological_process	0.98328	1	36	17754	207	76974	20	16
GO:0005667	transcription factor complex	cellular_component	0.99957	1	36	17754	248	76974	20	16
GO:0005199	structural constituent of cell wall	molecular_function	0.000367	0.017078	26	17754	62	76974	19	7
GO:0006721	terpenoid metabolic process	biological_process	0.001144	0.041021	38	17754	102	76974	19	19
GO:0016114	terpenoid biosynthetic process	biological_process	0.001144	0.041021	38	17754	102	76974	19	19
GO:0010035	response to inorganic substance	biological_process	0.002834	0.086972	22	17754	56	76974	19	3
GO:0051087	chaperone binding	molecular_function	0.005815	0.14075	34	17754	99	76974	19	15
GO:0005839	proteasome core complex	cellular_component	0.011209	0.2153	40	17754	129	76974	19	21
GO:0008374	O-acyltransferase activity	molecular_function	0.012012	0.21949	44	17754	139	76974	19	25
GO:0007030	Golgi organization	biological_process	0.013683	0.23711	34	17754	102	76974	19	15
GO:0015936	coenzyme A metabolic process	biological_process	0.074602	0.66949	38	17754	131	76974	19	19
GO:0006338	chromatin remodeling	biological_process	0.18758	1	30	17754	114	76974	19	11
GO:0043631	RNA polyadenylation	biological_process	0.19501	1	24	17754	86	76974	19	5
GO:0098542	defense response to other organism	biological_process	0.53662	1	31	17754	138	76974	19	12
GO:0016877	ligase activity, forming carbon-sulfur bonds	molecular_function	0.55278	1	36	17754	155	76974	19	17
GO:0008641	small protein activating enzyme activity	molecular_function	0.60134	1	34	17754	149	76974	19	15
GO:0005096	GTPase activator activity	molecular_function	0.62629	1	30	17754	133	76974	19	11
GO:0055065	metal ion homeostasis	biological_process	0.74481	1	35	17754	172	76974	19	16
GO:0050801	ion homeostasis	biological_process	0.75513	1	35	17754	173	76974	19	16
GO:0055080	cation homeostasis	biological_process	0.75513	1	35	17754	173	76974	19	16
GO:0098771	inorganic ion homeostasis	biological_process	0.75513	1	35	17754	173	76974	19	16
GO:0006479	protein methylation	biological_process	0.7848	1	34	17754	163	76974	19	15
GO:0008213	protein alkylation	biological_process	0.7848	1	34	17754	163	76974	19	15
GO:0048878	chemical homeostasis	biological_process	0.81484	1	35	17754	178	76974	19	16
GO:0046486	glycerolipid metabolic process	biological_process	0.99579	1	48	17754	289	76974	19	29
GO:0090575	RNA polymerase II transcription factor complex	cellular_component	0.99776	1	35	17754	225	76974	19	16
GO:0006650	glycerophospholipid metabolic process	biological_process	0.99898	1	41	17754	268	76974	19	22
GO:0044798	nuclear transcription factor complex	cellular_component	0.99927	1	35	17754	238	76974	19	16
GO:0009664	plant-type cell wall organization	biological_process	0.000257	0.012303	25	17754	57	76974	18	7
GO:0071669	plant-type cell wall organization or biogenesis	biological_process	0.000257	0.012303	25	17754	57	76974	18	7
GO:0045934	negative regulation of nucleobase-containing compound metabolic process	biological_process	0.001023	0.038433	50	17754	143	76974	18	32
GO:0030258	lipid modification	biological_process	0.04615	0.51723	41	17754	138	76974	18	23
GO:0046434	organophosphate catabolic process	biological_process	0.065917	0.61296	38	17754	130	76974	18	20
GO:0000785	chromatin	cellular_component	0.14314	0.91956	32	17754	118	76974	18	14
GO:0016160	amylase activity	molecular_function	0.28829	1	27	17754	103	76974	18	9
GO:1990204	oxidoreductase complex	cellular_component	0.36837	1	50	17754	221	76974	18	32
GO:0006553	lysine metabolic process	biological_process	0.39876	1	36	17754	150	76974	18	18
GO:0061025	membrane fusion	biological_process	0.41294	1	34	17754	141	76974	18	16
GO:0006873	cellular ion homeostasis	biological_process	0.76253	1	33	17754	164	76974	18	15
GO:0006875	cellular metal ion homeostasis	biological_process	0.76253	1	33	17754	164	76974	18	15
GO:0030003	cellular cation homeostasis	biological_process	0.76253	1	33	17754	164	76974	18	15
GO:0055082	cellular chemical homeostasis	biological_process	0.76253	1	33	17754	164	76974	18	15
GO:0070838	divalent metal ion transport	biological_process	0.81576	1	32	17754	157	76974	18	14
GO:0000794	condensed nuclear chromosome	cellular_component	0.83363	1	32	17754	159	76974	18	14
GO:0007067	mitotic nuclear division	biological_process	0.96972	1	24	17754	142	76974	18	6
GO:0016054	organic acid catabolic process	biological_process	0.98142	1	24	17754	145	76974	18	6
GO:0046395	carboxylic acid catabolic process	biological_process	0.98142	1	24	17754	145	76974	18	6
GO:0044282	small molecule catabolic process	biological_process	0.99156	1	26	17754	163	76974	18	8
GO:0016459	myosin complex	cellular_component	0.99901	1	21	17754	153	76974	18	3
GO:0051701	interaction with host	biological_process	1	1	34	17754	340	76974	18	16
GO:0006072	glycerol-3-phosphate metabolic process	biological_process	0.006071	0.14472	35	17754	101	76974	17	18
GO:0046168	glycerol-3-phosphate catabolic process	biological_process	0.006071	0.14472	35	17754	101	76974	17	18
GO:0006298	mismatch repair	biological_process	0.030646	0.40769	34	17754	107	76974	17	17
GO:0000990	transcription factor activity, core RNA polymerase binding	molecular_function	0.2232	1	30	17754	113	76974	17	13
GO:0000996	core DNA-dependent RNA polymerase binding promoter specificity activity	molecular_function	0.2232	1	30	17754	113	76974	17	13
GO:0016987	sigma factor activity	molecular_function	0.2232	1	30	17754	113	76974	17	13
GO:0023051	regulation of signaling	biological_process	0.23513	1	43	17754	167	76974	17	26
GO:0006413	translational initiation	biological_process	0.421	1	34	17754	144	76974	17	17
GO:0070566	adenylyltransferase activity	molecular_function	0.45679	1	25	17754	103	76974	17	8
GO:0044272	sulfur compound biosynthetic process	biological_process	0.55547	1	31	17754	134	76974	17	14
GO:0010604	positive regulation of macromolecule metabolic process	biological_process	0.63808	1	30	17754	137	76974	17	13
GO:0045259	proton-transporting ATP synthase complex	cellular_component	0.83715	1	34	17754	175	76974	17	17
GO:0016891	endoribonuclease activity, producing 5'-phosphomonoesters	molecular_function	0.83723	1	30	17754	150	76974	17	13
GO:0048278	vesicle docking	biological_process	0.86629	1	24	17754	122	76974	17	7
GO:1901615	organic hydroxy compound metabolic process	biological_process	0.88257	1	31	17754	160	76974	17	14
GO:0005985	sucrose metabolic process	biological_process	0.92018	1	22	17754	118	76974	17	5
GO:0022406	membrane docking	biological_process	0.9557	1	25	17754	142	76974	17	8
GO:0009064	glutamine family amino acid metabolic process	biological_process	0.95915	1	37	17754	202	76974	17	20
GO:0022900	electron transport chain	biological_process	0.99005	1	29	17754	183	76974	17	12
GO:0045892	negative regulation of transcription, DNA-templated	biological_process	0.003302	0.095722	46	17754	136	76974	16	30
GO:0051253	negative regulation of RNA metabolic process	biological_process	0.003302	0.095722	46	17754	136	76974	16	30
GO:1902679	negative regulation of RNA biosynthetic process	biological_process	0.003302	0.095722	46	17754	136	76974	16	30
GO:1903507	negative regulation of nucleic acid-templated transcription	biological_process	0.003302	0.095722	46	17754	136	76974	16	30
GO:1901700	response to oxygen-containing compound	biological_process	0.020726	0.31095	18	17754	51	76974	16	2
GO:0015294	solute:cation symporter activity	molecular_function	0.082925	0.69681	26	17754	87	76974	16	10
GO:0015293	symporter activity	molecular_function	0.10584	0.79527	27	17754	93	76974	16	11
GO:0051321	meiotic cell cycle	biological_process	0.16356	0.99474	26	17754	93	76974	16	10
GO:0015937	coenzyme A biosynthetic process	biological_process	0.18479	1	33	17754	122	76974	16	17
GO:0033866	nucleoside bisphosphate biosynthetic process	biological_process	0.18479	1	33	17754	122	76974	16	17
GO:0034030	ribonucleoside bisphosphate biosynthetic process	biological_process	0.18479	1	33	17754	122	76974	16	17
GO:0034033	purine nucleoside bisphosphate biosynthetic process	biological_process	0.18479	1	33	17754	122	76974	16	17
GO:0009966	regulation of signal transduction	biological_process	0.23532	1	42	17754	163	76974	16	26
GO:0010646	regulation of cell communication	biological_process	0.26394	1	42	17754	165	76974	16	26
GO:0009085	lysine biosynthetic process	biological_process	0.32141	1	31	17754	125	76974	16	15
GO:0009089	lysine biosynthetic process via diaminopimelate	biological_process	0.32141	1	31	17754	125	76974	16	15
GO:0046451	diaminopimelate metabolic process	biological_process	0.32141	1	31	17754	125	76974	16	15
GO:0006821	chloride transport	biological_process	0.36715	1	27	17754	107	76974	16	11
GO:0016151	nickel cation binding	molecular_function	0.3901	1	34	17754	140	76974	16	18
GO:0016860	intramolecular oxidoreductase activity	molecular_function	0.44398	1	24	17754	102	76974	16	8
GO:0003777	microtubule motor activity	molecular_function	0.63315	1	40	17754	176	76974	16	24
GO:0007018	microtubule-based movement	biological_process	0.64505	1	40	17754	177	76974	16	24
GO:1903509	liposaccharide metabolic process	biological_process	0.74397	1	42	17754	203	76974	16	26
GO:0006904	vesicle docking involved in exocytosis	biological_process	0.75572	1	23	17754	109	76974	16	7
GO:0030154	cell differentiation	biological_process	0.76576	1	29	17754	144	76974	16	13
GO:0003993	acid phosphatase activity	molecular_function	0.78357	1	22	17754	106	76974	16	6
GO:0005773	vacuole	cellular_component	0.82814	1	32	17754	160	76974	16	16
GO:0005262	calcium channel activity	molecular_function	0.82962	1	26	17754	133	76974	16	10
GO:0015085	calcium ion transmembrane transporter activity	molecular_function	0.85238	1	26	17754	135	76974	16	10
GO:0016157	sucrose synthase activity	molecular_function	0.8906	1	19	17754	100	76974	16	3
GO:0015035	protein disulfide oxidoreductase activity	molecular_function	0.94908	1	22	17754	134	76974	16	6
GO:0015036	disulfide oxidoreductase activity	molecular_function	0.94908	1	22	17754	134	76974	16	6
GO:0015081	sodium ion transmembrane transporter activity	molecular_function	0.97952	1	29	17754	179	76974	16	13
GO:0046488	phosphatidylinositol metabolic process	biological_process	0.99501	1	38	17754	237	76974	16	22
GO:0004315	3-oxoacyl-[acyl-carrier-protein] synthase activity	molecular_function	6.22e-06	0.000436	39	17754	86	76974	15	24
GO:0004312	fatty acid synthase activity	molecular_function	8.77e-06	0.00058	39	17754	87	76974	15	24
GO:0030983	mismatched DNA binding	molecular_function	0.030626	0.40769	31	17754	96	76974	15	16
GO:0008483	transaminase activity	molecular_function	0.04313	0.49399	21	17754	63	76974	15	6
GO:0016769	transferase activity, transferring nitrogenous groups	molecular_function	0.04313	0.49399	21	17754	63	76974	15	6
GO:0016790	thiolester hydrolase activity	molecular_function	0.04555	0.51295	40	17754	135	76974	15	25
GO:0004764	shikimate 3-dehydrogenase (NADP+) activity	molecular_function	0.097667	0.76313	20	17754	64	76974	15	5
GO:0000413	protein peptidyl-prolyl isomerization	biological_process	0.10408	0.78831	35	17754	130	76974	15	20
GO:0003755	peptidyl-prolyl cis-trans isomerase activity	molecular_function	0.10408	0.78831	35	17754	130	76974	15	20
GO:0016859	cis-trans isomerase activity	molecular_function	0.10408	0.78831	35	17754	130	76974	15	20
GO:0018208	peptidyl-proline modification	biological_process	0.10408	0.78831	35	17754	130	76974	15	20
GO:0000790	nuclear chromatin	cellular_component	0.12304	0.87573	22	17754	76	76974	15	7
GO:0060590	ATPase regulator activity	molecular_function	0.18025	1	34	17754	132	76974	15	19
GO:0044033	multi-organism metabolic process	biological_process	0.20934	1	33	17754	123	76974	15	18
GO:0007034	vacuolar transport	biological_process	0.27695	1	19	17754	73	76974	15	4
GO:0043241	protein complex disassembly	biological_process	0.29019	1	33	17754	131	76974	15	18
GO:0008443	phosphofructokinase activity	molecular_function	0.29727	1	32	17754	126	76974	15	17
GO:0004127	cytidylate kinase activity	molecular_function	0.30171	1	31	17754	120	76974	15	16
GO:0008855	exodeoxyribonuclease VII activity	molecular_function	0.30604	1	29	17754	115	76974	15	14
GO:0004529	exodeoxyribonuclease activity	molecular_function	0.31669	1	30	17754	120	76974	15	15
GO:0016895	exodeoxyribonuclease activity, producing 5'-phosphomonoesters	molecular_function	0.31669	1	30	17754	120	76974	15	15
GO:0019200	carbohydrate kinase activity	molecular_function	0.34845	1	32	17754	129	76974	15	17
GO:0005730	nucleolus	cellular_component	0.41026	1	28	17754	118	76974	15	13
GO:0016872	intramolecular lyase activity	molecular_function	0.48901	1	23	17754	99	76974	15	8
GO:0022411	cellular component disassembly	biological_process	0.48903	1	33	17754	142	76974	15	18
GO:0032984	macromolecular complex disassembly	biological_process	0.48903	1	33	17754	142	76974	15	18
GO:0006323	DNA packaging	biological_process	0.65462	1	34	17754	155	76974	15	19
GO:0003697	single-stranded DNA binding	molecular_function	0.69723	1	16	17754	75	76974	15	1
GO:0032324	molybdopterin cofactor biosynthetic process	biological_process	0.70344	1	24	17754	111	76974	15	9
GO:0043545	molybdopterin cofactor metabolic process	biological_process	0.70344	1	24	17754	111	76974	15	9
GO:0051189	prosthetic group metabolic process	biological_process	0.70344	1	24	17754	111	76974	15	9
GO:0005753	mitochondrial proton-transporting ATP synthase complex	cellular_component	0.73228	1	23	17754	114	76974	15	8
GO:0006891	intra-Golgi vesicle-mediated transport	biological_process	0.7688	1	23	17754	111	76974	15	8
GO:0006383	transcription from RNA polymerase III promoter	biological_process	0.82074	1	23	17754	121	76974	15	8
GO:0046915	transition metal ion transmembrane transporter activity	molecular_function	0.93252	1	18	17754	107	76974	15	3
GO:0033180	proton-transporting V-type ATPase, V1 domain	cellular_component	0.94795	1	31	17754	172	76974	15	16
GO:0000041	transition metal ion transport	biological_process	0.96617	1	18	17754	115	76974	15	3
GO:0005882	intermediate filament	cellular_component	0.98798	1	27	17754	164	76974	15	12
GO:0045111	intermediate filament cytoskeleton	cellular_component	0.98798	1	27	17754	164	76974	15	12
GO:0045182	translation regulator activity	molecular_function	0.9987	1	55	17754	324	76974	15	40
GO:0008170	N-methyltransferase activity	molecular_function	0.99995	1	28	17754	229	76974	15	13
GO:0004143	diacylglycerol kinase activity	molecular_function	0.000241	0.012018	17	17754	32	76974	14	3
GO:0001101	response to acid chemical	biological_process	0.000386	0.017776	16	17754	32	76974	14	2
GO:0016762	xyloglucan:xyloglucosyl transferase activity	molecular_function	0.001064	0.039329	23	17754	56	76974	14	9
GO:0048046	apoplast	cellular_component	0.001064	0.039329	23	17754	56	76974	14	9
GO:0016624	oxidoreductase activity, acting on the aldehyde or oxo group of donors, disulfide as acceptor	molecular_function	0.014998	0.2474	26	17754	74	76974	14	12
GO:0016709	oxidoreductase activity, acting on paired donors, with incorporation or reduction of molecular oxygen, NAD(P)H as one donor, and incorporation of one atom of oxygen	molecular_function	0.043085	0.49399	39	17754	129	76974	14	25
GO:0006359	regulation of transcription from RNA polymerase III promoter	biological_process	0.05476	0.57189	19	17754	59	76974	14	5
GO:0030955	potassium ion binding	molecular_function	0.094675	0.74721	27	17754	90	76974	14	13
GO:0031420	alkali metal ion binding	molecular_function	0.094675	0.74721	27	17754	90	76974	14	13
GO:0007006	mitochondrial membrane organization	biological_process	0.13908	0.90641	23	17754	79	76974	14	9
GO:0071973	bacterial-type flagellum-dependent cell motility	biological_process	0.16082	0.98719	19	17754	66	76974	14	5
GO:0003855	3-dehydroquinate dehydratase activity	molecular_function	0.19224	1	19	17754	66	76974	14	5
GO:0016811	hydrolase activity, acting on carbon-nitrogen (but not peptide) bonds, in linear amides	molecular_function	0.21072	1	25	17754	94	76974	14	11
GO:0001539	cilium or flagellum-dependent cell motility	biological_process	0.21922	1	19	17754	69	76974	14	5
GO:0097588	archaeal or bacterial-type flagellum-dependent cell motility	biological_process	0.21922	1	19	17754	69	76974	14	5
GO:0016161	beta-amylase activity	molecular_function	0.25539	1	22	17754	81	76974	14	8
GO:0019207	kinase regulator activity	molecular_function	0.42438	1	20	17754	83	76974	14	6
GO:0015925	galactosidase activity	molecular_function	0.44288	1	31	17754	128	76974	14	17
GO:0009678	hydrogen-translocating pyrophosphatase activity	molecular_function	0.45721	1	24	17754	98	76974	14	10
GO:0048731	system development	biological_process	0.50797	1	20	17754	88	76974	14	6
GO:0007166	cell surface receptor signaling pathway	biological_process	0.59985	1	24	17754	111	76974	14	10
GO:0006094	gluconeogenesis	biological_process	0.75405	1	23	17754	110	76974	14	9
GO:0019319	hexose biosynthetic process	biological_process	0.75405	1	23	17754	110	76974	14	9
GO:0046364	monosaccharide biosynthetic process	biological_process	0.75405	1	23	17754	110	76974	14	9
GO:0018205	peptidyl-lysine modification	biological_process	0.76141	1	24	17754	114	76974	14	10
GO:0016854	racemase and epimerase activity	molecular_function	0.78173	1	19	17754	94	76974	14	5
GO:0006066	alcohol metabolic process	biological_process	0.82666	1	26	17754	131	76974	14	12
GO:0000221	vacuolar proton-transporting V-type ATPase, V1 domain	cellular_component	0.85241	1	30	17754	153	76974	14	16
GO:0016471	vacuolar proton-transporting V-type ATPase complex	cellular_component	0.85241	1	30	17754	153	76974	14	16
GO:0005774	vacuolar membrane	cellular_component	0.86213	1	30	17754	154	76974	14	16
GO:0044437	vacuolar part	cellular_component	0.86213	1	30	17754	154	76974	14	16
GO:0005230	extracellular ligand-gated ion channel activity	molecular_function	0.88045	1	22	17754	115	76974	14	8
GO:0006955	immune response	biological_process	0.9198	1	26	17754	141	76974	14	12
GO:0043161	proteasome-mediated ubiquitin-dependent protein catabolic process	biological_process	0.9431	1	22	17754	124	76974	14	8
GO:0010498	proteasomal protein catabolic process	biological_process	0.95304	1	22	17754	126	76974	14	8
GO:0042559	pteridine-containing compound biosynthetic process	biological_process	0.97635	1	24	17754	144	76974	14	10
GO:0006402	mRNA catabolic process	biological_process	0.97654	1	23	17754	139	76974	14	9
GO:0042558	pteridine-containing compound metabolic process	biological_process	0.98037	1	27	17754	162	76974	14	13
GO:0006401	RNA catabolic process	biological_process	0.98097	1	23	17754	141	76974	14	9
GO:0009415	response to water	biological_process	6.15e-05	0.003481	13	17754	21	76974	13	0
GO:0007205	protein kinase C-activating G-protein coupled receptor signaling pathway	biological_process	0.000541	0.023729	15	17754	28	76974	13	2
GO:0019773	proteasome core complex, alpha-subunit complex	cellular_component	0.001413	0.049156	26	17754	67	76974	13	13
GO:0005402	cation:sugar symporter activity	molecular_function	0.032868	0.43235	20	17754	58	76974	13	7
GO:0006081	cellular aldehyde metabolic process	biological_process	0.036959	0.45067	25	17754	77	76974	13	12
GO:0042180	cellular ketone metabolic process	biological_process	0.043334	0.49512	21	17754	64	76974	13	8
GO:0051119	sugar transmembrane transporter activity	molecular_function	0.052511	0.56003	20	17754	61	76974	13	7
GO:0004298	threonine-type endopeptidase activity	molecular_function	0.062923	0.60058	29	17754	101	76974	13	16
GO:0070003	threonine-type peptidase activity	molecular_function	0.062923	0.60058	29	17754	101	76974	13	16
GO:0005351	sugar:proton symporter activity	molecular_function	0.066538	0.61508	18	17754	55	76974	13	5
GO:0015295	solute:proton symporter activity	molecular_function	0.066538	0.61508	18	17754	55	76974	13	5
GO:0016298	lipase activity	molecular_function	0.099725	0.76781	20	17754	65	76974	13	7
GO:0006570	tyrosine metabolic process	biological_process	0.16186	0.99227	14	17754	46	76974	13	1
GO:0019080	viral gene expression	biological_process	0.21092	1	31	17754	115	76974	13	18
GO:0042651	thylakoid membrane	cellular_component	0.21755	1	44	17754	182	76974	13	31
GO:0045735	nutrient reservoir activity	molecular_function	0.3586	1	21	17754	90	76974	13	8
GO:0017119	Golgi transport complex	cellular_component	0.36063	1	26	17754	103	76974	13	13
GO:0016703	oxidoreductase activity, acting on single donors with incorporation of molecular oxygen, incorporation of one atom of oxygen (internal monooxygenases or internal mixed function oxidases)	molecular_function	0.36514	1	22	17754	88	76974	13	9
GO:0032269	negative regulation of cellular protein metabolic process	biological_process	0.40543	1	23	17754	94	76974	13	10
GO:0051248	negative regulation of protein metabolic process	biological_process	0.40543	1	23	17754	94	76974	13	10
GO:0070887	cellular response to chemical stimulus	biological_process	0.4862	1	22	17754	98	76974	13	9
GO:0009288	bacterial-type flagellum	cellular_component	0.55792	1	19	17754	84	76974	13	6
GO:0010628	positive regulation of gene expression	biological_process	0.59146	1	26	17754	117	76974	13	13
GO:0016868	intramolecular transferase activity, phosphotransferases	molecular_function	0.63795	1	25	17754	114	76974	13	12
GO:0010181	FMN binding	molecular_function	0.71735	1	21	17754	101	76974	13	8
GO:0000956	nuclear-transcribed mRNA catabolic process	biological_process	0.74705	1	20	17754	97	76974	13	7
GO:0006664	glycolipid metabolic process	biological_process	0.75061	1	39	17754	190	76974	13	26
GO:0009247	glycolipid biosynthetic process	biological_process	0.75061	1	39	17754	190	76974	13	26
GO:0046467	membrane lipid biosynthetic process	biological_process	0.75061	1	39	17754	190	76974	13	26
GO:0016763	transferase activity, transferring pentosyl groups	molecular_function	0.77337	1	29	17754	139	76974	13	16
GO:0030030	cell projection organization	biological_process	0.78008	1	21	17754	107	76974	13	8
GO:0005777	peroxisome	cellular_component	0.80853	1	22	17754	114	76974	13	9
GO:0042579	microbody	cellular_component	0.80853	1	22	17754	114	76974	13	9
GO:0008172	S-methyltransferase activity	molecular_function	0.80888	1	15	17754	77	76974	13	2
GO:0005852	eukaryotic translation initiation factor 3 complex	cellular_component	0.85537	1	20	17754	105	76974	13	7
GO:0006022	aminoglycan metabolic process	biological_process	0.87254	1	20	17754	108	76974	13	7
GO:0016651	oxidoreductase activity, acting on NAD(P)H	molecular_function	0.89925	1	27	17754	147	76974	13	14
GO:0045263	proton-transporting ATP synthase complex, coupling factor F(o)	cellular_component	0.9332	1	25	17754	144	76974	13	12
GO:0016042	lipid catabolic process	biological_process	0.93348	1	18	17754	102	76974	13	5
GO:0009063	cellular amino acid catabolic process	biological_process	0.96267	1	19	17754	113	76974	13	6
GO:0009396	folic acid-containing compound biosynthetic process	biological_process	0.97936	1	22	17754	134	76974	13	9
GO:0006760	folic acid-containing compound metabolic process	biological_process	0.98121	1	25	17754	151	76974	13	12
GO:0008173	RNA methyltransferase activity	molecular_function	0.99237	1	32	17754	197	76974	13	19
GO:0006304	DNA modification	biological_process	0.99749	1	21	17754	160	76974	13	8
GO:0033043	regulation of organelle organization	biological_process	0.99887	1	24	17754	172	76974	13	11
GO:0019684	photosynthesis, light reaction	biological_process	1.83e-06	0.000135	53	17754	126	76974	12	41
GO:0019359	nicotinamide nucleotide biosynthetic process	biological_process	0.012616	0.22612	14	17754	33	76974	12	2
GO:0019363	pyridine nucleotide biosynthetic process	biological_process	0.01685	0.26732	14	17754	34	76974	12	2
GO:0000774	adenyl-nucleotide exchange factor activity	molecular_function	0.02108	0.31369	25	17754	74	76974	12	13
GO:0051336	regulation of hydrolase activity	biological_process	0.036134	0.44294	25	17754	78	76974	12	13
GO:0071310	cellular response to organic substance	biological_process	0.043965	0.4999	18	17754	53	76974	12	6
GO:0019083	viral transcription	biological_process	0.048818	0.5358	27	17754	85	76974	12	15
GO:0007127	meiosis I	biological_process	0.082946	0.69681	20	17754	64	76974	12	8
GO:0006536	glutamate metabolic process	biological_process	0.12528	0.88003	24	17754	83	76974	12	12
GO:0072525	pyridine-containing compound biosynthetic process	biological_process	0.13563	0.89963	16	17754	52	76974	12	4
GO:0007126	meiotic nuclear division	biological_process	0.15399	0.96085	20	17754	69	76974	12	8
GO:1903046	meiotic cell cycle process	biological_process	0.15399	0.96085	20	17754	69	76974	12	8
GO:0004559	alpha-mannosidase activity	molecular_function	0.1675	0.99694	29	17754	103	76974	12	17
GO:0016641	oxidoreductase activity, acting on the CH-NH2 group of donors, oxygen as acceptor	molecular_function	0.18425	1	26	17754	95	76974	12	14
GO:0043624	cellular protein complex disassembly	biological_process	0.19414	1	30	17754	113	76974	12	18
GO:0004652	polynucleotide adenylyltransferase activity	molecular_function	0.21581	1	17	17754	59	76974	12	5
GO:0008839	4-hydroxy-tetrahydrodipicolinate reductase	molecular_function	0.24086	1	24	17754	92	76974	12	12
GO:0000921	septin ring assembly	biological_process	0.29356	1	19	17754	72	76974	12	7
GO:0005940	septin ring	cellular_component	0.29356	1	19	17754	72	76974	12	7
GO:0031106	septin ring organization	biological_process	0.29356	1	19	17754	72	76974	12	7
GO:0032156	septin cytoskeleton	cellular_component	0.29356	1	19	17754	72	76974	12	7
GO:0032185	septin cytoskeleton organization	biological_process	0.29356	1	19	17754	72	76974	12	7
GO:0042597	periplasmic space	cellular_component	0.30761	1	23	17754	92	76974	12	11
GO:0072527	pyrimidine-containing compound metabolic process	biological_process	0.35144	1	29	17754	118	76974	12	17
GO:0042546	cell wall biogenesis	biological_process	0.36808	1	16	17754	62	76974	12	4
GO:0048038	quinone binding	molecular_function	0.37029	1	26	17754	103	76974	12	14
GO:0000746	conjugation	biological_process	0.39575	1	26	17754	106	76974	12	14
GO:0004612	phosphoenolpyruvate carboxykinase (ATP) activity	molecular_function	0.52235	1	18	17754	76	76974	12	6
GO:0016861	intramolecular oxidoreductase activity, interconverting aldoses and ketoses	molecular_function	0.5473	1	19	17754	84	76974	12	7
GO:0005247	voltage-gated chloride channel activity	molecular_function	0.5676	1	23	17754	99	76974	12	11
GO:0005253	anion channel activity	molecular_function	0.5676	1	23	17754	99	76974	12	11
GO:0005254	chloride channel activity	molecular_function	0.5676	1	23	17754	99	76974	12	11
GO:0008308	voltage-gated anion channel activity	molecular_function	0.5676	1	23	17754	99	76974	12	11
GO:0015108	chloride transmembrane transporter activity	molecular_function	0.5676	1	23	17754	99	76974	12	11
GO:0004565	beta-galactosidase activity	molecular_function	0.57222	1	23	17754	100	76974	12	11
GO:0015923	mannosidase activity	molecular_function	0.60192	1	30	17754	131	76974	12	18
GO:0005231	excitatory extracellular ligand-gated ion channel activity	molecular_function	0.64833	1	17	17754	76	76974	12	5
GO:0004129	cytochrome-c oxidase activity	molecular_function	0.64838	1	21	17754	100	76974	12	9
GO:0016675	oxidoreductase activity, acting on a heme group of donors	molecular_function	0.64838	1	21	17754	100	76974	12	9
GO:0016676	oxidoreductase activity, acting on a heme group of donors, oxygen as acceptor	molecular_function	0.64838	1	21	17754	100	76974	12	9
GO:0009891	positive regulation of biosynthetic process	biological_process	0.66379	1	24	17754	112	76974	12	12
GO:0010557	positive regulation of macromolecule biosynthetic process	biological_process	0.66379	1	24	17754	112	76974	12	12
GO:0031328	positive regulation of cellular biosynthetic process	biological_process	0.66379	1	24	17754	112	76974	12	12
GO:0051173	positive regulation of nitrogen compound metabolic process	biological_process	0.66379	1	24	17754	112	76974	12	12
GO:1902495	transmembrane transporter complex	cellular_component	0.67379	1	16	17754	78	76974	12	4
GO:1990351	transporter complex	cellular_component	0.67379	1	16	17754	78	76974	12	4
GO:0006040	amino sugar metabolic process	biological_process	0.67642	1	18	17754	86	76974	12	6
GO:0019748	secondary metabolic process	biological_process	0.71702	1	18	17754	85	76974	12	6
GO:0015002	heme-copper terminal oxidase activity	molecular_function	0.74505	1	22	17754	110	76974	12	10
GO:0006777	Mo-molybdopterin cofactor biosynthetic process	biological_process	0.76004	1	18	17754	87	76974	12	6
GO:0019720	Mo-molybdopterin cofactor metabolic process	biological_process	0.76004	1	18	17754	87	76974	12	6
GO:0004611	phosphoenolpyruvate carboxykinase activity	molecular_function	0.82425	1	26	17754	128	76974	12	14
GO:0051302	regulation of cell division	biological_process	0.8819	1	19	17754	102	76974	12	7
GO:0000070	mitotic sister chromatid segregation	biological_process	0.9026	1	16	17754	89	76974	12	4
GO:0000819	sister chromatid segregation	biological_process	0.9026	1	16	17754	89	76974	12	4
GO:0030414	peptidase inhibitor activity	molecular_function	0.9116	1	15	17754	90	76974	12	3
GO:0061134	peptidase regulator activity	molecular_function	0.9116	1	15	17754	90	76974	12	3
GO:0004970	ionotropic glutamate receptor activity	molecular_function	0.91232	1	20	17754	109	76974	12	8
GO:0008066	glutamate receptor activity	molecular_function	0.91232	1	20	17754	109	76974	12	8
GO:0030162	regulation of proteolysis	biological_process	0.91873	1	16	17754	91	76974	12	4
GO:0030176	integral component of endoplasmic reticulum membrane	cellular_component	0.92052	1	23	17754	131	76974	12	11
GO:0031227	intrinsic component of endoplasmic reticulum membrane	cellular_component	0.92052	1	23	17754	131	76974	12	11
GO:1901606	alpha-amino acid catabolic process	biological_process	0.94956	1	18	17754	105	76974	12	6
GO:0018995	host	cellular_component	0.95092	1	26	17754	150	76974	12	14
GO:0033643	host cell part	cellular_component	0.95092	1	26	17754	150	76974	12	14
GO:0043657	host cell	cellular_component	0.95092	1	26	17754	150	76974	12	14
GO:0044215	other organism	cellular_component	0.95092	1	26	17754	150	76974	12	14
GO:0044216	other organism cell	cellular_component	0.95092	1	26	17754	150	76974	12	14
GO:0044217	other organism part	cellular_component	0.95092	1	26	17754	150	76974	12	14
GO:0006874	cellular calcium ion homeostasis	biological_process	0.98907	1	20	17754	136	76974	12	8
GO:0055074	calcium ion homeostasis	biological_process	0.98907	1	20	17754	136	76974	12	8
GO:0072503	cellular divalent inorganic cation homeostasis	biological_process	0.98907	1	20	17754	136	76974	12	8
GO:0072507	divalent inorganic cation homeostasis	biological_process	0.98907	1	20	17754	136	76974	12	8
GO:0009733	response to auxin	biological_process	1.18e-09	1.85e-07	31	17754	53	76974	11	20
GO:0031124	mRNA 3'-end processing	biological_process	0.00656	0.15249	14	17754	32	76974	11	3
GO:0051537	2 iron, 2 sulfur cluster binding	molecular_function	0.015724	0.25201	21	17754	58	76974	11	10
GO:1901661	quinone metabolic process	biological_process	0.020634	0.31056	18	17754	49	76974	11	7
GO:1901663	quinone biosynthetic process	biological_process	0.020634	0.31056	18	17754	49	76974	11	7
GO:0031123	RNA 3'-end processing	biological_process	0.021344	0.31619	14	17754	36	76974	11	3
GO:0042181	ketone biosynthetic process	biological_process	0.025641	0.35624	18	17754	50	76974	11	7
GO:0003951	NAD+ kinase activity	molecular_function	0.034929	0.44294	11	17754	27	76974	11	0
GO:0006741	NADP biosynthetic process	biological_process	0.034929	0.44294	11	17754	27	76974	11	0
GO:0006415	translational termination	biological_process	0.035025	0.44294	27	17754	85	76974	11	16
GO:0006743	ubiquinone metabolic process	biological_process	0.044925	0.50714	14	17754	39	76974	11	3
GO:0006744	ubiquinone biosynthetic process	biological_process	0.044925	0.50714	14	17754	39	76974	11	3
GO:0043066	negative regulation of apoptotic process	biological_process	0.048947	0.5358	15	17754	43	76974	11	4
GO:0043069	negative regulation of programmed cell death	biological_process	0.048947	0.5358	15	17754	43	76974	11	4
GO:0060548	negative regulation of cell death	biological_process	0.048947	0.5358	15	17754	43	76974	11	4
GO:0005544	calcium-dependent phospholipid binding	molecular_function	0.050609	0.5476	18	17754	54	76974	11	7
GO:0016840	carbon-nitrogen lyase activity	molecular_function	0.090568	0.72952	17	17754	54	76974	11	6
GO:0006935	chemotaxis	biological_process	0.11685	0.84813	17	17754	58	76974	11	6
GO:0042330	taxis	biological_process	0.11685	0.84813	17	17754	58	76974	11	6
GO:0001522	pseudouridine synthesis	biological_process	0.14072	0.9091	24	17754	85	76974	11	13
GO:0016615	malate dehydrogenase activity	molecular_function	0.19362	1	19	17754	66	76974	11	8
GO:0015095	magnesium ion transmembrane transporter activity	molecular_function	0.24678	1	22	17754	81	76974	11	11
GO:0015693	magnesium ion transport	biological_process	0.24678	1	22	17754	81	76974	11	11
GO:0031072	heat shock protein binding	molecular_function	0.25377	1	26	17754	100	76974	11	15
GO:0016814	hydrolase activity, acting on carbon-nitrogen (but not peptide) bonds, in cyclic amidines	molecular_function	0.25964	1	19	17754	71	76974	11	8
GO:0044801	single-organism membrane fusion	biological_process	0.29096	1	23	17754	89	76974	11	12
GO:0048284	organelle fusion	biological_process	0.31411	1	22	17754	86	76974	11	11
GO:0006083	acetate metabolic process	biological_process	0.333	1	14	17754	52	76974	11	3
GO:0009615	response to virus	biological_process	0.38504	1	23	17754	93	76974	11	12
GO:0048468	cell development	biological_process	0.42795	1	19	17754	81	76974	11	8
GO:0043086	negative regulation of catalytic activity	biological_process	0.50353	1	22	17754	96	76974	11	11
GO:0044092	negative regulation of molecular function	biological_process	0.50353	1	22	17754	96	76974	11	11
GO:0000123	histone acetyltransferase complex	cellular_component	0.53253	1	15	17754	64	76974	11	4
GO:0031248	protein acetyltransferase complex	cellular_component	0.53253	1	15	17754	64	76974	11	4
GO:1902493	acetyltransferase complex	cellular_component	0.53253	1	15	17754	64	76974	11	4
GO:0009539	photosystem II reaction center	cellular_component	0.53685	1	12	17754	52	76974	11	1
GO:0009341	beta-galactosidase complex	cellular_component	0.5445	1	22	17754	94	76974	11	11
GO:0043021	ribonucleoprotein complex binding	molecular_function	0.54772	1	18	17754	80	76974	11	7
GO:0019013	viral nucleocapsid	cellular_component	0.55659	1	21	17754	92	76974	11	10
GO:0003729	mRNA binding	molecular_function	0.5666	1	13	17754	57	76974	11	2
GO:0044822	poly(A) RNA binding	molecular_function	0.5666	1	13	17754	57	76974	11	2
GO:0044702	single organism reproductive process	biological_process	0.57058	1	22	17754	98	76974	11	11
GO:0008121	ubiquinol-cytochrome-c reductase activity	molecular_function	0.58605	1	14	17754	64	76974	11	3
GO:0016681	oxidoreductase activity, acting on diphenols and related substances as donors, cytochrome as acceptor	molecular_function	0.58605	1	14	17754	64	76974	11	3
GO:0019783	ubiquitin-like protein-specific protease activity	molecular_function	0.60604	1	22	17754	98	76974	11	11
GO:0005234	extracellular-glutamate-gated ion channel activity	molecular_function	0.65854	1	16	17754	72	76974	11	5
GO:0022904	respiratory electron transport chain	biological_process	0.71321	1	18	17754	89	76974	11	7
GO:0019953	sexual reproduction	biological_process	0.7456	1	22	17754	107	76974	11	11
GO:0043015	gamma-tubulin binding	molecular_function	0.77542	1	18	17754	87	76974	11	7
GO:0000276	mitochondrial proton-transporting ATP synthase complex, coupling factor F(o)	cellular_component	0.78814	1	18	17754	94	76974	11	7
GO:0000922	spindle pole	cellular_component	0.79387	1	18	17754	88	76974	11	7
GO:0009084	glutamine family amino acid biosynthetic process	biological_process	0.8215	1	24	17754	120	76974	11	13
GO:0003916	DNA topoisomerase activity	molecular_function	0.86219	1	23	17754	118	76974	11	12
GO:0098799	outer mitochondrial membrane protein complex	cellular_component	0.8958	1	18	17754	99	76974	11	7
GO:0000075	cell cycle checkpoint	biological_process	0.91356	1	16	17754	91	76974	11	5
GO:0001510	RNA methylation	biological_process	0.9205	1	23	17754	126	76974	11	12
GO:0005217	intracellular ligand-gated ion channel activity	molecular_function	0.96784	1	17	17754	108	76974	11	6
GO:0005218	intracellular ligand-gated calcium channel activity	molecular_function	0.96784	1	17	17754	108	76974	11	6
GO:0005219	ryanodine-sensitive calcium-release channel activity	molecular_function	0.96784	1	17	17754	108	76974	11	6
GO:0015278	calcium-release channel activity	molecular_function	0.96784	1	17	17754	108	76974	11	6
GO:0022884	macromolecule transmembrane transporter activity	molecular_function	0.97291	1	16	17754	111	76974	11	5
GO:0005672	transcription factor TFIIA complex	cellular_component	0.97984	1	24	17754	145	76974	11	13
GO:0016645	oxidoreductase activity, acting on the CH-NH group of donors	molecular_function	0.99924	1	26	17754	184	76974	11	15
GO:0000940	condensed chromosome outer kinetochore	cellular_component	0.99961	1	19	17754	151	76974	11	8
GO:0000777	condensed chromosome kinetochore	cellular_component	0.99988	1	19	17754	159	76974	11	8
GO:0000779	condensed chromosome, centromeric region	cellular_component	0.99988	1	19	17754	159	76974	11	8
GO:0004930	G-protein coupled receptor activity	molecular_function	1	1	19	17754	201	76974	11	8
GO:0004594	pantothenate kinase activity	molecular_function	0.002802	0.086557	22	17754	53	76974	10	12
GO:0019682	glyceraldehyde-3-phosphate metabolic process	biological_process	0.004468	0.11528	19	17754	46	76974	10	9
GO:0008661	1-deoxy-D-xylulose-5-phosphate synthase activity	molecular_function	0.008049	0.17781	21	17754	54	76974	10	11
GO:0016744	transferase activity, transferring aldehyde or ketonic groups	molecular_function	0.008049	0.17781	21	17754	54	76974	10	11
GO:0004424	imidazoleglycerol-phosphate dehydratase activity	molecular_function	0.008216	0.17781	13	17754	29	76974	10	3
GO:0015105	arsenite transmembrane transporter activity	molecular_function	0.020113	0.30567	16	17754	41	76974	10	6
GO:0015700	arsenite transport	biological_process	0.020113	0.30567	16	17754	41	76974	10	6
GO:0016049	cell growth	biological_process	0.022664	0.32448	13	17754	32	76974	10	3
GO:0035064	methylated histone binding	molecular_function	0.063655	0.60556	10	17754	26	76974	10	0
GO:0008094	DNA-dependent ATPase activity	molecular_function	0.068599	0.6243	37	17754	127	76974	10	27
GO:0004402	histone acetyltransferase activity	molecular_function	0.075025	0.66949	16	17754	48	76974	10	6
GO:0034212	peptide N-acetyltransferase activity	molecular_function	0.075025	0.66949	16	17754	48	76974	10	6
GO:0061733	peptide-lysine-N-acetyltransferase activity	molecular_function	0.075025	0.66949	16	17754	48	76974	10	6
GO:0004743	pyruvate kinase activity	molecular_function	0.091844	0.73727	21	17754	67	76974	10	11
GO:0006302	double-strand break repair	biological_process	0.13192	0.89729	21	17754	72	76974	10	11
GO:0006537	glutamate biosynthetic process	biological_process	0.13864	0.90549	22	17754	76	76974	10	12
GO:0043650	dicarboxylic acid biosynthetic process	biological_process	0.13864	0.90549	22	17754	76	76974	10	12
GO:0080134	regulation of response to stress	biological_process	0.15406	0.96085	18	17754	62	76974	10	8
GO:0015930	glutamate synthase activity	molecular_function	0.15428	0.96085	22	17754	77	76974	10	12
GO:0008417	fucosyltransferase activity	molecular_function	0.16457	0.99474	12	17754	38	76974	10	2
GO:0004470	malic enzyme activity	molecular_function	0.1709	1	18	17754	61	76974	10	8
GO:0004471	malate dehydrogenase (decarboxylating) (NAD+) activity	molecular_function	0.1709	1	18	17754	61	76974	10	8
GO:0040007	growth	biological_process	0.18468	1	14	17754	47	76974	10	4
GO:0019887	protein kinase regulator activity	molecular_function	0.22106	1	14	17754	50	76974	10	4
GO:0009522	photosystem I	cellular_component	0.23218	1	23	17754	91	76974	10	13
GO:0009654	photosystem II oxygen evolving complex	cellular_component	0.24032	1	37	17754	154	76974	10	27
GO:0030182	neuron differentiation	biological_process	0.30585	1	14	17754	55	76974	10	4
GO:0048699	generation of neurons	biological_process	0.30585	1	14	17754	55	76974	10	4
GO:0022008	neurogenesis	biological_process	0.33423	1	14	17754	56	76974	10	4
GO:0000288	nuclear-transcribed mRNA catabolic process, deadenylation-dependent decay	biological_process	0.35703	1	13	17754	51	76974	10	3
GO:0007399	nervous system development	biological_process	0.36289	1	14	17754	57	76974	10	4
GO:0016682	oxidoreductase activity, acting on diphenols and related substances as donors, oxygen as acceptor	molecular_function	0.39349	1	12	17754	48	76974	10	2
GO:0031047	gene silencing by RNA	biological_process	0.45582	1	17	17754	69	76974	10	7
GO:0016458	gene silencing	biological_process	0.4766	1	18	17754	74	76974	10	8
GO:0004813	alanine-tRNA ligase activity	molecular_function	0.48984	1	17	17754	70	76974	10	7
GO:0006419	alanyl-tRNA aminoacylation	biological_process	0.48984	1	17	17754	70	76974	10	7
GO:0045893	positive regulation of transcription, DNA-templated	biological_process	0.55001	1	20	17754	87	76974	10	10
GO:1903508	positive regulation of nucleic acid-templated transcription	biological_process	0.55001	1	20	17754	87	76974	10	10
GO:0009095	aromatic amino acid family biosynthetic process, prephenate pathway	biological_process	0.56271	1	12	17754	52	76974	10	2
GO:0005798	Golgi-associated vesicle	cellular_component	0.61971	1	15	17754	67	76974	10	5
GO:0030660	Golgi-associated vesicle membrane	cellular_component	0.61971	1	15	17754	67	76974	10	5
GO:0008026	ATP-dependent helicase activity	molecular_function	0.63263	1	29	17754	130	76974	10	19
GO:0070035	purine NTP-dependent helicase activity	molecular_function	0.63263	1	29	17754	130	76974	10	19
GO:0042775	mitochondrial ATP synthesis coupled electron transport	biological_process	0.63735	1	16	17754	76	76974	10	6
GO:0016832	aldehyde-lyase activity	molecular_function	0.64619	1	20	17754	93	76974	10	10
GO:0051607	defense response to virus	biological_process	0.66097	1	14	17754	65	76974	10	4
GO:0002252	immune effector process	biological_process	0.6854	1	14	17754	66	76974	10	4
GO:0045935	positive regulation of nucleobase-containing compound metabolic process	biological_process	0.69708	1	20	17754	94	76974	10	10
GO:0051254	positive regulation of RNA metabolic process	biological_process	0.69708	1	20	17754	94	76974	10	10
GO:1902680	positive regulation of RNA biosynthetic process	biological_process	0.69708	1	20	17754	94	76974	10	10
GO:0006839	mitochondrial transport	biological_process	0.70208	1	19	17754	91	76974	10	9
GO:0032182	ubiquitin-like protein binding	molecular_function	0.76034	1	17	17754	84	76974	10	7
GO:0006119	oxidative phosphorylation	biological_process	0.77956	1	16	17754	83	76974	10	6
GO:0042773	ATP synthesis coupled electron transport	biological_process	0.77956	1	16	17754	83	76974	10	6
GO:0031023	microtubule organizing center organization	biological_process	0.80499	1	15	17754	76	76974	10	5
GO:0003860	3-hydroxyisobutyryl-CoA hydrolase activity	molecular_function	0.81931	1	16	17754	83	76974	10	6
GO:0016289	CoA hydrolase activity	molecular_function	0.81931	1	16	17754	83	76974	10	6
GO:0035091	phosphatidylinositol binding	molecular_function	0.85685	1	18	17754	93	76974	10	8
GO:0003006	developmental process involved in reproduction	biological_process	0.85756	1	16	17754	85	76974	10	6
GO:0019751	polyol metabolic process	biological_process	0.87792	1	20	17754	105	76974	10	10
GO:0006368	transcription elongation from RNA polymerase II promoter	biological_process	0.87818	1	18	17754	97	76974	10	8
GO:0032879	regulation of localization	biological_process	0.88727	1	20	17754	110	76974	10	10
GO:0006354	DNA-templated transcription, elongation	biological_process	0.90764	1	18	17754	100	76974	10	8
GO:0035821	modification of morphology or physiology of other organism	biological_process	0.93104	1	17	17754	99	76974	10	7
GO:0004866	endopeptidase inhibitor activity	molecular_function	0.94528	1	12	17754	79	76974	10	2
GO:0061135	endopeptidase regulator activity	molecular_function	0.94528	1	12	17754	79	76974	10	2
GO:0006403	RNA localization	biological_process	0.99989	1	23	17754	191	76974	10	13
GO:0050657	nucleic acid transport	biological_process	0.99989	1	23	17754	191	76974	10	13
GO:0050658	RNA transport	biological_process	0.99989	1	23	17754	191	76974	10	13
GO:0051236	establishment of RNA localization	biological_process	0.99989	1	23	17754	191	76974	10	13
GO:0015931	nucleobase-containing compound transport	biological_process	0.99997	1	23	17754	199	76974	10	13
GO:0000148	1,3-beta-D-glucan synthase complex	cellular_component	0.99999	1	12	17754	139	76974	10	2
GO:0003843	1,3-beta-D-glucan synthase activity	molecular_function	0.99999	1	12	17754	139	76974	10	2
GO:0006074	(1->3)-beta-D-glucan metabolic process	biological_process	0.99999	1	12	17754	139	76974	10	2
GO:0006075	(1->3)-beta-D-glucan biosynthetic process	biological_process	0.99999	1	12	17754	139	76974	10	2
GO:0016838	carbon-oxygen lyase activity, acting on phosphates	molecular_function	1.59e-11	6.04e-09	100	17754	232	76974	9	91
GO:0006098	pentose-phosphate shunt	biological_process	0.00477	0.12174	18	17754	43	76974	9	9
GO:0051156	glucose 6-phosphate metabolic process	biological_process	0.00477	0.12174	18	17754	43	76974	9	9
GO:0030259	lipid glycosylation	biological_process	0.004955	0.12511	29	17754	79	76974	9	20
GO:0003747	translation release factor activity	molecular_function	0.025513	0.35551	23	17754	67	76974	9	14
GO:0008079	translation termination factor activity	molecular_function	0.025513	0.35551	23	17754	67	76974	9	14
GO:0016717	oxidoreductase activity, acting on paired donors, with oxidation of a pair of donors resulting in the reduction of molecular oxygen to two molecules of water	molecular_function	0.039404	0.47446	16	17754	45	76974	9	7
GO:0043900	regulation of multi-organism process	biological_process	0.052712	0.56003	29	17754	95	76974	9	20
GO:0016843	amine-lyase activity	molecular_function	0.11207	0.82617	12	17754	37	76974	9	3
GO:0016844	strictosidine synthase activity	molecular_function	0.11207	0.82617	12	17754	37	76974	9	3
GO:0070206	protein trimerization	biological_process	0.12702	0.88237	24	17754	83	76974	9	15
GO:0004645	phosphorylase activity	molecular_function	0.13162	0.89729	13	17754	40	76974	9	4
GO:0008184	glycogen phosphorylase activity	molecular_function	0.13162	0.89729	13	17754	40	76974	9	4
GO:0019385	methanogenesis, from acetate	biological_process	0.16788	0.99795	9	17754	27	76974	9	0
GO:0004665	prephenate dehydrogenase (NADP+) activity	molecular_function	0.21621	1	10	17754	33	76974	9	1
GO:0006571	tyrosine biosynthetic process	biological_process	0.21621	1	10	17754	33	76974	9	1
GO:0008977	prephenate dehydrogenase activity	molecular_function	0.21621	1	10	17754	33	76974	9	1
GO:0004520	endodeoxyribonuclease activity	molecular_function	0.26025	1	21	17754	79	76974	9	12
GO:0031175	neuron projection development	biological_process	0.27948	1	13	17754	50	76974	9	4
GO:0048666	neuron development	biological_process	0.27948	1	13	17754	50	76974	9	4
GO:0019900	kinase binding	molecular_function	0.32565	1	27	17754	107	76974	9	18
GO:0009636	response to toxic substance	biological_process	0.33654	1	11	17754	42	76974	9	2
GO:0030599	pectinesterase activity	molecular_function	0.39397	1	25	17754	100	76974	9	16
GO:0042545	cell wall modification	biological_process	0.39397	1	25	17754	100	76974	9	16
GO:0004650	polygalacturonase activity	molecular_function	0.47292	1	14	17754	58	76974	9	5
GO:0000118	histone deacetylase complex	cellular_component	0.47564	1	11	17754	47	76974	9	2
GO:0016575	histone deacetylation	biological_process	0.47564	1	11	17754	47	76974	9	2
GO:0070823	HDA1 complex	cellular_component	0.47564	1	11	17754	47	76974	9	2
GO:0006476	protein deacetylation	biological_process	0.50055	1	12	17754	52	76974	9	3
GO:0035601	protein deacylation	biological_process	0.50055	1	12	17754	52	76974	9	3
GO:0098732	macromolecule deacylation	biological_process	0.50055	1	12	17754	52	76974	9	3
GO:0019239	deaminase activity	molecular_function	0.5247	1	15	17754	64	76974	9	6
GO:0016846	carbon-sulfur lyase activity	molecular_function	0.53392	1	15	17754	68	76974	9	6
GO:0009991	response to extracellular stimulus	biological_process	0.55431	1	12	17754	55	76974	9	3
GO:0031668	cellular response to extracellular stimulus	biological_process	0.55431	1	12	17754	55	76974	9	3
GO:0071496	cellular response to external stimulus	biological_process	0.55431	1	12	17754	55	76974	9	3
GO:0002097	tRNA wobble base modification	biological_process	0.576	1	16	17754	70	76974	9	7
GO:0006626	protein targeting to mitochondrion	biological_process	0.58246	1	17	17754	76	76974	9	8
GO:0033926	glycopeptide alpha-N-acetylgalactosaminidase activity	molecular_function	0.60253	1	15	17754	66	76974	9	6
GO:0018580	nitronate monooxygenase activity	molecular_function	0.60858	1	15	17754	68	76974	9	6
GO:0016226	iron-sulfur cluster assembly	biological_process	0.62554	1	16	17754	75	76974	9	7
GO:0031163	metallo-sulfur cluster assembly	biological_process	0.62554	1	16	17754	75	76974	9	7
GO:0070585	protein localization to mitochondrion	biological_process	0.62906	1	17	17754	78	76974	9	8
GO:0072655	establishment of protein localization to mitochondrion	biological_process	0.62906	1	17	17754	78	76974	9	8
GO:0005179	hormone activity	molecular_function	0.68354	1	21	17754	97	76974	9	12
GO:0031399	regulation of protein modification process	biological_process	0.69936	1	24	17754	114	76974	9	15
GO:0005746	mitochondrial respiratory chain	cellular_component	0.70932	1	14	17754	72	76974	9	5
GO:0009452	7-methylguanosine RNA capping	biological_process	0.72052	1	20	17754	94	76974	9	11
GO:0036260	RNA capping	biological_process	0.72052	1	20	17754	94	76974	9	11
GO:0009236	cobalamin biosynthetic process	biological_process	0.74591	1	21	17754	102	76974	9	12
GO:0006487	protein N-linked glycosylation	biological_process	0.77838	1	12	17754	61	76974	9	3
GO:0016857	racemase and epimerase activity, acting on carbohydrates and derivatives	molecular_function	0.78424	1	10	17754	52	76974	9	1
GO:0009235	cobalamin metabolic process	biological_process	0.79333	1	21	17754	105	76974	9	12
GO:0071806	protein transmembrane transport	biological_process	0.84332	1	17	17754	91	76974	9	8
GO:0005742	mitochondrial outer membrane translocase complex	cellular_component	0.86604	1	16	17754	86	76974	9	7
GO:0000096	sulfur amino acid metabolic process	biological_process	0.88949	1	12	17754	67	76974	9	3
GO:0004535	poly(A)-specific ribonuclease activity	molecular_function	0.91769	1	14	17754	82	76974	9	5
GO:0070469	respiratory chain	cellular_component	0.93026	1	14	17754	88	76974	9	5
GO:1901505	carbohydrate derivative transporter activity	molecular_function	0.93161	1	13	17754	79	76974	9	4
GO:0033218	amide binding	molecular_function	0.93249	1	14	17754	85	76974	9	5
GO:0043248	proteasome assembly	biological_process	0.97285	1	13	17754	85	76974	9	4
GO:0000175	3'-5'-exoribonuclease activity	molecular_function	0.98626	1	14	17754	97	76974	9	5
GO:0004532	exoribonuclease activity	molecular_function	0.98626	1	14	17754	97	76974	9	5
GO:0016896	exoribonuclease activity, producing 5'-phosphomonoesters	molecular_function	0.98626	1	14	17754	97	76974	9	5
GO:0045017	glycerolipid biosynthetic process	biological_process	0.98638	1	32	17754	196	76974	9	23
GO:0010564	regulation of cell cycle process	biological_process	0.99526	1	12	17754	93	76974	9	3
GO:0008276	protein methyltransferase activity	molecular_function	0.99622	1	19	17754	134	76974	9	10
GO:0046474	glycerophospholipid biosynthetic process	biological_process	0.99727	1	25	17754	175	76974	9	16
GO:0000778	condensed nuclear chromosome kinetochore	cellular_component	0.99797	1	16	17754	122	76974	9	7
GO:0000780	condensed nuclear chromosome, centromeric region	cellular_component	0.99797	1	16	17754	122	76974	9	7
GO:0000942	condensed nuclear chromosome outer kinetochore	cellular_component	0.99797	1	16	17754	122	76974	9	7
GO:0042729	DASH complex	cellular_component	0.99797	1	16	17754	122	76974	9	7
GO:0015932	nucleobase-containing compound transmembrane transporter activity	molecular_function	0.99961	1	15	17754	135	76974	9	6
GO:0016646	oxidoreductase activity, acting on the CH-NH group of donors, NAD or NADP as acceptor	molecular_function	0.99988	1	17	17754	146	76974	9	8
GO:0000062	fatty-acyl-CoA binding	molecular_function	0.001136	0.041021	15	17754	31	76974	8	7
GO:0030151	molybdenum ion binding	molecular_function	0.013897	0.23796	22	17754	60	76974	8	14
GO:0033202	DNA helicase complex	cellular_component	0.020926	0.31295	14	17754	35	76974	8	6
GO:0015159	polysaccharide transmembrane transporter activity	molecular_function	0.027461	0.37597	10	17754	25	76974	8	2
GO:0051052	regulation of DNA metabolic process	biological_process	0.032851	0.43235	16	17754	44	76974	8	8
GO:0015774	polysaccharide transport	biological_process	0.035898	0.44294	10	17754	26	76974	8	2
GO:0033037	polysaccharide localization	biological_process	0.035898	0.44294	10	17754	26	76974	8	2
GO:0016671	oxidoreductase activity, acting on a sulfur group of donors, disulfide as acceptor	molecular_function	0.049254	0.5379	12	17754	34	76974	8	4
GO:0005375	copper ion transmembrane transporter activity	molecular_function	0.062826	0.60058	8	17754	21	76974	8	0
GO:0035434	copper ion transmembrane transport	biological_process	0.062826	0.60058	8	17754	21	76974	8	0
GO:0006480	N-terminal protein amino acid methylation	biological_process	0.071205	0.64428	10	17754	28	76974	8	2
GO:0031365	N-terminal protein amino acid modification	biological_process	0.071205	0.64428	10	17754	28	76974	8	2
GO:0007131	reciprocal meiotic recombination	biological_process	0.087542	0.71996	14	17754	42	76974	8	6
GO:0035825	reciprocal DNA recombination	biological_process	0.087542	0.71996	14	17754	42	76974	8	6
GO:0004620	phospholipase activity	molecular_function	0.090154	0.72868	12	17754	35	76974	8	4
GO:2000026	regulation of multicellular organismal development	biological_process	0.094284	0.74721	15	17754	47	76974	8	7
GO:0008131	primary amine oxidase activity	molecular_function	0.11307	0.82972	21	17754	69	76974	8	13
GO:0051239	regulation of multicellular organismal process	biological_process	0.13444	0.89729	17	17754	57	76974	8	9
GO:0050793	regulation of developmental process	biological_process	0.24743	1	20	17754	76	76974	8	12
GO:0006825	copper ion transport	biological_process	0.25823	1	8	17754	29	76974	8	0
GO:0004869	cysteine-type endopeptidase inhibitor activity	molecular_function	0.2722	1	9	17754	33	76974	8	1
GO:0016888	endodeoxyribonuclease activity, producing 5'-phosphomonoesters	molecular_function	0.39367	1	14	17754	56	76974	8	6
GO:0000289	nuclear-transcribed mRNA poly(A) tail shortening	biological_process	0.39698	1	11	17754	44	76974	8	3
GO:0004499	N,N-dimethylaniline monooxygenase activity	molecular_function	0.41242	1	18	17754	72	76974	8	10
GO:0019901	protein kinase binding	molecular_function	0.43575	1	25	17754	104	76974	8	17
GO:0030260	entry into host cell	biological_process	0.44224	1	12	17754	48	76974	8	4
GO:0044409	entry into host	biological_process	0.44224	1	12	17754	48	76974	8	4
GO:0046718	viral entry into host cell	biological_process	0.44224	1	12	17754	48	76974	8	4
GO:0051806	entry into cell of other organism involved in symbiotic interaction	biological_process	0.44224	1	12	17754	48	76974	8	4
GO:0051828	entry into other organism involved in symbiotic interaction	biological_process	0.44224	1	12	17754	48	76974	8	4
GO:0003873	6-phosphofructo-2-kinase activity	molecular_function	0.47365	1	17	17754	72	76974	8	9
GO:0006000	fructose metabolic process	biological_process	0.47365	1	17	17754	72	76974	8	9
GO:0005092	GDP-dissociation inhibitor activity	molecular_function	0.52257	1	15	17754	64	76974	8	7
GO:0008272	sulfate transport	biological_process	0.55025	1	19	17754	82	76974	8	11
GO:0015116	sulfate transmembrane transporter activity	molecular_function	0.55025	1	19	17754	82	76974	8	11
GO:1901682	sulfur compound transmembrane transporter activity	molecular_function	0.55025	1	19	17754	82	76974	8	11
GO:1901068	guanosine-containing compound metabolic process	biological_process	0.55033	1	16	17754	70	76974	8	8
GO:0000097	sulfur amino acid biosynthetic process	biological_process	0.563	1	11	17754	47	76974	8	3
GO:1990542	mitochondrial transmembrane transport	biological_process	0.56847	1	15	17754	66	76974	8	7
GO:0003746	translation elongation factor activity	molecular_function	0.56855	1	19	17754	86	76974	8	11
GO:0072348	sulfur compound transport	biological_process	0.56935	1	19	17754	83	76974	8	11
GO:0015098	molybdate ion transmembrane transporter activity	molecular_function	0.58242	1	12	17754	52	76974	8	4
GO:0015689	molybdate ion transport	biological_process	0.58242	1	12	17754	52	76974	8	4
GO:0006771	riboflavin metabolic process	biological_process	0.58358	1	15	17754	67	76974	8	7
GO:0009231	riboflavin biosynthetic process	biological_process	0.58358	1	15	17754	67	76974	8	7
GO:0042726	flavin-containing compound metabolic process	biological_process	0.58358	1	15	17754	67	76974	8	7
GO:0042727	flavin-containing compound biosynthetic process	biological_process	0.58358	1	15	17754	67	76974	8	7
GO:0008312	7S RNA binding	molecular_function	0.58414	1	12	17754	55	76974	8	4
GO:0048500	signal recognition particle	cellular_component	0.58414	1	12	17754	55	76974	8	4
GO:0030474	spindle pole body duplication	biological_process	0.63917	1	12	17754	54	76974	8	4
GO:0051300	spindle pole body organization	biological_process	0.63917	1	12	17754	54	76974	8	4
GO:0005047	signal recognition particle binding	molecular_function	0.64881	1	12	17754	55	76974	8	4
GO:0006414	translational elongation	biological_process	0.67383	1	19	17754	91	76974	8	11
GO:0044036	cell wall macromolecule metabolic process	biological_process	0.67468	1	13	17754	63	76974	8	5
GO:0046912	transferase activity, transferring acyl groups, acyl groups converted into alkyl on transfer	molecular_function	0.76162	1	13	17754	65	76974	8	5
GO:0052126	movement in host environment	biological_process	0.80255	1	12	17754	62	76974	8	4
GO:0052192	movement in environment of other organism involved in symbiotic interaction	biological_process	0.80255	1	12	17754	62	76974	8	4
GO:0016886	ligase activity, forming phosphoric ester bonds	molecular_function	0.82911	1	21	17754	106	76974	8	13
GO:0065002	intracellular protein transmembrane transport	biological_process	0.84189	1	16	17754	86	76974	8	8
GO:0005048	signal sequence binding	molecular_function	0.87501	1	11	17754	64	76974	8	3
GO:0042277	peptide binding	molecular_function	0.87501	1	11	17754	64	76974	8	3
GO:0003995	acyl-CoA dehydrogenase activity	molecular_function	0.888	1	16	17754	86	76974	8	8
GO:0009507	chloroplast	cellular_component	0.90853	1	17	17754	103	76974	8	9
GO:0009536	plastid	cellular_component	0.90853	1	17	17754	103	76974	8	9
GO:0044087	regulation of cellular component biogenesis	biological_process	0.91321	1	15	17754	86	76974	8	7
GO:0000049	tRNA binding	molecular_function	0.9405	1	26	17754	144	76974	8	18
GO:1901617	organic hydroxy compound biosynthetic process	biological_process	0.94554	1	13	17754	79	76974	8	5
GO:0044003	modification by symbiont of host morphology or physiology	biological_process	0.95957	1	15	17754	94	76974	8	7
GO:0051817	modification of morphology or physiology of other organism involved in symbiotic interaction	biological_process	0.95957	1	15	17754	94	76974	8	7
GO:0006835	dicarboxylic acid transport	biological_process	0.98304	1	19	17754	126	76974	8	11
GO:0045786	negative regulation of cell cycle	biological_process	0.98493	1	11	17754	80	76974	8	3
GO:0030029	actin filament-based process	biological_process	0.98857	1	16	17754	109	76974	8	8
GO:0030036	actin cytoskeleton organization	biological_process	0.98857	1	16	17754	109	76974	8	8
GO:0042176	regulation of protein catabolic process	biological_process	0.98954	1	10	17754	76	76974	8	2
GO:0034453	microtubule anchoring	biological_process	0.99014	1	15	17754	105	76974	8	7
GO:0004488	methylenetetrahydrofolate dehydrogenase (NADP+) activity	molecular_function	0.99533	1	16	17754	115	76974	8	8
GO:0007346	regulation of mitotic cell cycle	biological_process	0.99622	1	9	17754	77	76974	8	1
GO:0016278	lysine N-methyltransferase activity	molecular_function	0.99779	1	15	17754	115	76974	8	7
GO:0016279	protein-lysine N-methyltransferase activity	molecular_function	0.99779	1	15	17754	115	76974	8	7
GO:0018024	histone-lysine N-methyltransferase activity	molecular_function	0.99779	1	15	17754	115	76974	8	7
GO:0042054	histone methyltransferase activity	molecular_function	0.99779	1	15	17754	115	76974	8	7
GO:0022624	proteasome accessory complex	cellular_component	0.000249	0.012189	13	17754	22	76974	7	6
GO:0006665	sphingolipid metabolic process	biological_process	0.001592	0.052854	9	17754	15	76974	7	2
GO:0006672	ceramide metabolic process	biological_process	0.001592	0.052854	9	17754	15	76974	7	2
GO:0055076	transition metal ion homeostasis	biological_process	0.006822	0.15705	15	17754	36	76974	7	8
GO:0007007	inner mitochondrial membrane organization	biological_process	0.00884	0.18439	14	17754	32	76974	7	7
GO:0042407	cristae formation	biological_process	0.00884	0.18439	14	17754	32	76974	7	7
GO:0061617	MICOS complex	cellular_component	0.00884	0.18439	14	17754	32	76974	7	7
GO:0051090	regulation of sequence-specific DNA binding transcription factor activity	biological_process	0.009155	0.18939	13	17754	29	76974	7	6
GO:0031304	intrinsic component of mitochondrial inner membrane	cellular_component	0.011921	0.21868	14	17754	33	76974	7	7
GO:0031305	integral component of mitochondrial inner membrane	cellular_component	0.011921	0.21868	14	17754	33	76974	7	7
GO:0032592	integral component of mitochondrial membrane	cellular_component	0.011921	0.21868	14	17754	33	76974	7	7
GO:0098573	intrinsic component of mitochondrial membrane	cellular_component	0.011921	0.21868	14	17754	33	76974	7	7
GO:0010109	regulation of photosynthesis	biological_process	0.013151	0.22959	13	17754	31	76974	7	6
GO:0042548	regulation of photosynthesis, light reaction	biological_process	0.013151	0.22959	13	17754	31	76974	7	6
GO:0042549	photosystem II stabilization	biological_process	0.013151	0.22959	13	17754	31	76974	7	6
GO:0043467	regulation of generation of precursor metabolites and energy	biological_process	0.013151	0.22959	13	17754	31	76974	7	6
GO:0043281	regulation of cysteine-type endopeptidase activity involved in apoptotic process	biological_process	0.017557	0.27574	10	17754	22	76974	7	3
GO:2000116	regulation of cysteine-type endopeptidase activity	biological_process	0.017557	0.27574	10	17754	22	76974	7	3
GO:0004435	phosphatidylinositol phospholipase C activity	molecular_function	0.01832	0.28418	11	17754	25	76974	7	4
GO:0004629	phospholipase C activity	molecular_function	0.01832	0.28418	11	17754	25	76974	7	4
GO:0044461	bacterial-type flagellum part	cellular_component	0.023992	0.33935	12	17754	30	76974	7	5
GO:0008883	glutamyl-tRNA reductase activity	molecular_function	0.024201	0.34128	8	17754	17	76974	7	1
GO:0044463	cell projection part	cellular_component	0.047368	0.52462	12	17754	33	76974	7	5
GO:0005451	monovalent cation:proton antiporter activity	molecular_function	0.053482	0.56439	16	17754	46	76974	7	9
GO:0015491	cation:cation antiporter activity	molecular_function	0.053482	0.56439	16	17754	46	76974	7	9
GO:0016778	diphosphotransferase activity	molecular_function	0.053808	0.56655	13	17754	36	76974	7	6
GO:0003964	RNA-directed DNA polymerase activity	molecular_function	0.054802	0.57189	9	17754	22	76974	7	2
GO:0015385	sodium:proton antiporter activity	molecular_function	0.055812	0.57603	14	17754	39	76974	7	7
GO:0052547	regulation of peptidase activity	biological_process	0.059622	0.58505	10	17754	26	76974	7	3
GO:0052548	regulation of endopeptidase activity	biological_process	0.059622	0.58505	10	17754	26	76974	7	3
GO:0009790	embryo development	biological_process	0.066874	0.61697	14	17754	41	76974	7	7
GO:0009916	alternative oxidase activity	molecular_function	0.076778	0.66949	8	17754	21	76974	7	1
GO:0015969	guanosine tetraphosphate metabolic process	biological_process	0.11194	0.82617	13	17754	39	76974	7	6
GO:0034035	purine ribonucleoside bisphosphate metabolic process	biological_process	0.11194	0.82617	13	17754	39	76974	7	6
GO:0005849	mRNA cleavage factor complex	cellular_component	0.1216	0.87048	7	17754	19	76974	7	0
GO:0006378	mRNA polyadenylation	biological_process	0.1216	0.87048	7	17754	19	76974	7	0
GO:0015696	ammonium transport	biological_process	0.17162	1	13	17754	43	76974	7	6
GO:0007409	axonogenesis	biological_process	0.20873	1	10	17754	36	76974	7	3
GO:0007411	axon guidance	biological_process	0.20873	1	10	17754	36	76974	7	3
GO:0048667	cell morphogenesis involved in neuron differentiation	biological_process	0.20873	1	10	17754	36	76974	7	3
GO:0048812	neuron projection morphogenesis	biological_process	0.20873	1	10	17754	36	76974	7	3
GO:0061564	axon development	biological_process	0.20873	1	10	17754	36	76974	7	3
GO:0097485	neuron projection guidance	biological_process	0.20873	1	10	17754	36	76974	7	3
GO:0008519	ammonium transmembrane transporter activity	molecular_function	0.24711	1	13	17754	46	76974	7	6
GO:0000904	cell morphogenesis involved in differentiation	biological_process	0.27137	1	10	17754	38	76974	7	3
GO:0003872	6-phosphofructokinase activity	molecular_function	0.27469	1	15	17754	54	76974	7	8
GO:0016272	prefoldin complex	cellular_component	0.30126	1	19	17754	74	76974	7	12
GO:0004345	glucose-6-phosphate dehydrogenase activity	molecular_function	0.30559	1	12	17754	43	76974	7	5
GO:0005750	mitochondrial respiratory chain complex III	cellular_component	0.35803	1	11	17754	44	76974	7	4
GO:0006122	mitochondrial electron transport, ubiquinol to cytochrome c	biological_process	0.35803	1	11	17754	44	76974	7	4
GO:0045275	respiratory chain complex III	cellular_component	0.35803	1	11	17754	44	76974	7	4
GO:0019238	cyclohydrolase activity	molecular_function	0.37251	1	10	17754	38	76974	7	3
GO:0019064	fusion of virus membrane with host plasma membrane	biological_process	0.3812	1	11	17754	42	76974	7	4
GO:0039663	membrane fusion involved in viral entry into host cell	biological_process	0.3812	1	11	17754	42	76974	7	4
GO:0044800	multi-organism membrane fusion	biological_process	0.3812	1	11	17754	42	76974	7	4
GO:0044803	multi-organism membrane organization	biological_process	0.3812	1	11	17754	42	76974	7	4
GO:0032990	cell part morphogenesis	biological_process	0.38882	1	10	17754	42	76974	7	3
GO:0048858	cell projection morphogenesis	biological_process	0.38882	1	10	17754	42	76974	7	3
GO:0051015	actin filament binding	molecular_function	0.39453	1	8	17754	30	76974	7	1
GO:0004602	glutathione peroxidase activity	molecular_function	0.39654	1	10	17754	40	76974	7	3
GO:0009289	pilus	cellular_component	0.43283	1	10	17754	39	76974	7	3
GO:0019843	rRNA binding	molecular_function	0.43302	1	15	17754	65	76974	7	8
GO:0070069	cytochrome complex	cellular_component	0.48459	1	14	17754	62	76974	7	7
GO:0005801	cis-Golgi network	cellular_component	0.58063	1	18	17754	79	76974	7	11
GO:0003849	3-deoxy-7-phosphoheptulonate synthase activity	molecular_function	0.6003	1	8	17754	35	76974	7	1
GO:0009314	response to radiation	biological_process	0.62989	1	16	17754	71	76974	7	9
GO:0006030	chitin metabolic process	biological_process	0.63727	1	12	17754	57	76974	7	5
GO:1901071	glucosamine-containing compound metabolic process	biological_process	0.63727	1	12	17754	57	76974	7	5
GO:0009967	positive regulation of signal transduction	biological_process	0.65454	1	12	17754	56	76974	7	5
GO:0010647	positive regulation of cell communication	biological_process	0.65454	1	12	17754	56	76974	7	5
GO:0023056	positive regulation of signaling	biological_process	0.65454	1	12	17754	56	76974	7	5
GO:0008053	mitochondrial fusion	biological_process	0.6818	1	14	17754	67	76974	7	7
GO:0072528	pyrimidine-containing compound biosynthetic process	biological_process	0.69793	1	20	17754	96	76974	7	13
GO:0048584	positive regulation of response to stimulus	biological_process	0.7056	1	13	17754	63	76974	7	6
GO:0005126	cytokine receptor binding	molecular_function	0.73088	1	13	17754	63	76974	7	6
GO:0008061	chitin binding	molecular_function	0.74715	1	9	17754	47	76974	7	2
GO:0007008	outer mitochondrial membrane organization	biological_process	0.75083	1	9	17754	45	76974	7	2
GO:0045040	protein import into mitochondrial outer membrane	biological_process	0.75083	1	9	17754	45	76974	7	2
GO:0090151	establishment of protein localization to mitochondrial membrane	biological_process	0.75083	1	9	17754	45	76974	7	2
GO:0016655	oxidoreductase activity, acting on NAD(P)H, quinone or similar compound as acceptor	molecular_function	0.76798	1	18	17754	93	76974	7	11
GO:0019888	protein phosphatase regulator activity	molecular_function	0.78131	1	22	17754	107	76974	7	15
GO:0003684	damaged DNA binding	molecular_function	0.79777	1	16	17754	80	76974	7	9
GO:0016881	acid-amino acid ligase activity	molecular_function	0.81232	1	19	17754	94	76974	7	12
GO:0098803	respiratory chain complex	cellular_component	0.8157	1	12	17754	68	76974	7	5
GO:0051130	positive regulation of cellular component organization	biological_process	0.83581	1	16	17754	87	76974	7	9
GO:0030126	COPI vesicle coat	cellular_component	0.8462	1	9	17754	49	76974	7	2
GO:0030137	COPI-coated vesicle	cellular_component	0.8462	1	9	17754	49	76974	7	2
GO:0030663	COPI-coated vesicle membrane	cellular_component	0.8462	1	9	17754	49	76974	7	2
GO:0051338	regulation of transferase activity	biological_process	0.85122	1	17	17754	91	76974	7	10
GO:0022843	voltage-gated cation channel activity	molecular_function	0.85194	1	9	17754	51	76974	7	2
GO:0044743	intracellular protein transmembrane import	biological_process	0.85548	1	15	17754	82	76974	7	8
GO:0006289	nucleotide-excision repair	biological_process	0.8591	1	18	17754	94	76974	7	11
GO:0016755	transferase activity, transferring amino-acyl groups	molecular_function	0.86125	1	11	17754	61	76974	7	4
GO:0006020	inositol metabolic process	biological_process	0.88415	1	11	17754	62	76974	7	4
GO:0046165	alcohol biosynthetic process	biological_process	0.88443	1	10	17754	57	76974	7	3
GO:0003909	DNA ligase activity	molecular_function	0.8989	1	13	17754	73	76974	7	6
GO:0019208	phosphatase regulator activity	molecular_function	0.90137	1	23	17754	122	76974	7	16
GO:0004512	inositol-3-phosphate synthase activity	molecular_function	0.91193	1	9	17754	54	76974	7	2
GO:0006021	inositol biosynthetic process	biological_process	0.91193	1	9	17754	54	76974	7	2
GO:0046173	polyol biosynthetic process	biological_process	0.91193	1	9	17754	54	76974	7	2
GO:0045861	negative regulation of proteolysis	biological_process	0.91632	1	11	17754	66	76974	7	4
GO:0051235	maintenance of location	biological_process	0.92459	1	13	17754	77	76974	7	6
GO:0016782	transferase activity, transferring sulfur-containing groups	molecular_function	0.92681	1	16	17754	95	76974	7	9
GO:0033646	host intracellular part	cellular_component	0.94098	1	18	17754	106	76974	7	11
GO:0043656	intracellular region of host	cellular_component	0.94098	1	18	17754	106	76974	7	11
GO:0009877	nodulation	biological_process	0.94157	1	10	17754	65	76974	7	3
GO:0031109	microtubule polymerization or depolymerization	biological_process	0.9526	1	12	17754	74	76974	7	5
GO:0006816	calcium ion transport	biological_process	0.95941	1	10	17754	67	76974	7	3
GO:0051493	regulation of cytoskeleton organization	biological_process	0.96554	1	14	17754	90	76974	7	7
GO:0051028	mRNA transport	biological_process	0.96869	1	17	17754	105	76974	7	10
GO:0019068	virion assembly	biological_process	0.97106	1	19	17754	116	76974	7	12
GO:0015740	C4-dicarboxylate transport	biological_process	0.97231	1	18	17754	116	76974	7	11
GO:0005874	microtubule	cellular_component	0.97445	1	11	17754	75	76974	7	4
GO:0005876	spindle microtubule	cellular_component	0.97445	1	11	17754	75	76974	7	4
GO:0019048	modulation by virus of host morphology or physiology	biological_process	0.97651	1	13	17754	88	76974	7	6
GO:0005669	transcription factor TFIID complex	cellular_component	0.98082	1	10	17754	73	76974	7	3
GO:0008175	tRNA methyltransferase activity	molecular_function	0.99359	1	17	17754	119	76974	7	10
GO:0051304	chromosome separation	biological_process	0.99504	1	8	17754	69	76974	7	1
GO:0008608	attachment of spindle microtubules to kinetochore	biological_process	0.9958	1	13	17754	100	76974	7	6
GO:0017016	Ras GTPase binding	molecular_function	0.99729	1	13	17754	100	76974	7	6
GO:0031267	small GTPase binding	molecular_function	0.99729	1	13	17754	100	76974	7	6
GO:0051020	GTPase binding	molecular_function	0.99729	1	13	17754	100	76974	7	6
GO:0010333	terpene synthase activity	molecular_function	2.05e-12	9.63e-10	95	17754	210	76974	6	89
GO:0046685	response to arsenic-containing substance	biological_process	2.95e-08	2.94e-06	28	17754	45	76974	6	22
GO:0006282	regulation of DNA repair	biological_process	0.00161	0.052854	12	17754	22	76974	6	6
GO:0080135	regulation of cellular response to stress	biological_process	0.00161	0.052854	12	17754	22	76974	6	6
GO:2001020	regulation of response to DNA damage stimulus	biological_process	0.00161	0.052854	12	17754	22	76974	6	6
GO:0006879	cellular iron ion homeostasis	biological_process	0.003704	0.099969	13	17754	28	76974	6	7
GO:0046916	cellular transition metal ion homeostasis	biological_process	0.003704	0.099969	13	17754	28	76974	6	7
GO:0055072	iron ion homeostasis	biological_process	0.003704	0.099969	13	17754	28	76974	6	7
GO:0006432	phenylalanyl-tRNA aminoacylation	biological_process	0.013042	0.22959	9	17754	18	76974	6	3
GO:0019838	growth factor binding	molecular_function	0.013209	0.22974	10	17754	21	76974	6	4
GO:0004568	chitinase activity	molecular_function	0.021659	0.31984	10	17754	24	76974	6	4
GO:0008649	rRNA methyltransferase activity	molecular_function	0.035326	0.44294	13	17754	34	76974	6	7
GO:0045995	regulation of embryonic development	biological_process	0.04009	0.47904	13	17754	35	76974	6	7
GO:0051346	negative regulation of hydrolase activity	biological_process	0.04234	0.49399	14	17754	40	76974	6	8
GO:0006303	double-strand break repair via nonhomologous end joining	biological_process	0.046305	0.51774	12	17754	32	76974	6	6
GO:0008199	ferric iron binding	molecular_function	0.046462	0.51825	14	17754	40	76974	6	8
GO:0009584	detection of visible light	biological_process	0.05295	0.56129	15	17754	42	76974	6	9
GO:0001558	regulation of cell growth	biological_process	0.055536	0.57571	8	17754	19	76974	6	2
GO:0005520	insulin-like growth factor binding	molecular_function	0.055536	0.57571	8	17754	19	76974	6	2
GO:0000726	non-recombinational repair	biological_process	0.058364	0.57969	12	17754	33	76974	6	6
GO:0031011	Ino80 complex	cellular_component	0.058662	0.57995	11	17754	29	76974	6	5
GO:0097346	INO80-type complex	cellular_component	0.058662	0.57995	11	17754	29	76974	6	5
GO:0016477	cell migration	biological_process	0.059801	0.58505	13	17754	37	76974	6	7
GO:0030334	regulation of cell migration	biological_process	0.059801	0.58505	13	17754	37	76974	6	7
GO:0018298	protein-chromophore linkage	biological_process	0.064154	0.60556	15	17754	43	76974	6	9
GO:0006032	chitin catabolic process	biological_process	0.064218	0.60556	10	17754	28	76974	6	4
GO:0046348	amino sugar catabolic process	biological_process	0.064218	0.60556	10	17754	28	76974	6	4
GO:1901072	glucosamine-containing compound catabolic process	biological_process	0.064218	0.60556	10	17754	28	76974	6	4
GO:0005829	cytosol	cellular_component	0.068505	0.6243	12	17754	34	76974	6	6
GO:0031082	BLOC complex	cellular_component	0.068505	0.6243	12	17754	34	76974	6	6
GO:0031083	BLOC-1 complex	cellular_component	0.068505	0.6243	12	17754	34	76974	6	6
GO:0044445	cytosolic part	cellular_component	0.068505	0.6243	12	17754	34	76974	6	6
GO:0007129	synapsis	biological_process	0.076799	0.66949	9	17754	24	76974	6	3
GO:0007130	synaptonemal complex assembly	biological_process	0.076799	0.66949	9	17754	24	76974	6	3
GO:0045143	homologous chromosome segregation	biological_process	0.076799	0.66949	9	17754	24	76974	6	3
GO:0070192	chromosome organization involved in meiosis	biological_process	0.076799	0.66949	9	17754	24	76974	6	3
GO:0070193	synaptonemal complex organization	biological_process	0.076799	0.66949	9	17754	24	76974	6	3
GO:0009581	detection of external stimulus	biological_process	0.076843	0.66949	15	17754	44	76974	6	9
GO:0009582	detection of abiotic stimulus	biological_process	0.076843	0.66949	15	17754	44	76974	6	9
GO:0009583	detection of light stimulus	biological_process	0.076843	0.66949	15	17754	44	76974	6	9
GO:0098589	membrane region	cellular_component	0.087316	0.71996	13	17754	39	76974	6	7
GO:0051270	regulation of cellular component movement	biological_process	0.088282	0.72047	13	17754	39	76974	6	7
GO:2000145	regulation of cell motility	biological_process	0.088282	0.72047	13	17754	39	76974	6	7
GO:0044769	ATPase activity, coupled to transmembrane movement of ions, rotational mechanism	molecular_function	0.088717	0.72204	16	17754	51	76974	6	10
GO:0051606	detection of stimulus	biological_process	0.09106	0.73222	15	17754	45	76974	6	9
GO:0040008	regulation of growth	biological_process	0.09387	0.74721	8	17754	21	76974	6	2
GO:0010309	acireductone dioxygenase [iron(II)-requiring] activity	molecular_function	0.10818	0.81021	8	17754	24	76974	6	2
GO:0030155	regulation of cell adhesion	biological_process	0.11114	0.82453	14	17754	44	76974	6	8
GO:0009245	lipid A biosynthetic process	biological_process	0.12327	0.87573	10	17754	30	76974	6	4
GO:0046493	lipid A metabolic process	biological_process	0.12327	0.87573	10	17754	30	76974	6	4
GO:1901269	lipooligosaccharide metabolic process	biological_process	0.12327	0.87573	10	17754	30	76974	6	4
GO:1901271	lipooligosaccharide biosynthetic process	biological_process	0.12327	0.87573	10	17754	30	76974	6	4
GO:0006308	DNA catabolic process	biological_process	0.1269	0.88237	8	17754	23	76974	6	2
GO:0016149	translation release factor activity, codon specific	molecular_function	0.12982	0.89729	17	17754	55	76974	6	11
GO:0016998	cell wall macromolecule catabolic process	biological_process	0.13471	0.89729	10	17754	32	76974	6	4
GO:0009538	photosystem I reaction center	cellular_component	0.13507	0.8984	11	17754	38	76974	6	5
GO:0044815	DNA packaging complex	cellular_component	0.13797	0.90549	14	17754	46	76974	6	8
GO:0040012	regulation of locomotion	biological_process	0.16673	0.99474	13	17754	43	76974	6	7
GO:0031225	anchored component of membrane	cellular_component	0.19157	1	8	17754	25	76974	6	2
GO:0019829	cation-transporting ATPase activity	molecular_function	0.19265	1	16	17754	57	76974	6	10
GO:0042625	ATPase activity, coupled to transmembrane movement of ions	molecular_function	0.19265	1	16	17754	57	76974	6	10
GO:0045132	meiotic chromosome segregation	biological_process	0.20451	1	9	17754	29	76974	6	3
GO:0003980	UDP-glucose:glycoprotein glucosyltransferase activity	molecular_function	0.21219	1	6	17754	18	76974	6	0
GO:0006026	aminoglycan catabolic process	biological_process	0.24024	1	10	17754	36	76974	6	4
GO:0004112	cyclic-nucleotide phosphodiesterase activity	molecular_function	0.25862	1	12	17754	42	76974	6	6
GO:0070603	SWI/SNF superfamily-type complex	cellular_component	0.2594	1	11	17754	39	76974	6	5
GO:0016929	SUMO-specific protease activity	molecular_function	0.28785	1	11	17754	39	76974	6	5
GO:0032183	SUMO binding	molecular_function	0.28785	1	11	17754	39	76974	6	5
GO:0070122	isopeptidase activity	molecular_function	0.28785	1	11	17754	39	76974	6	5
GO:0070138	ubiquitin-like protein-specific isopeptidase activity	molecular_function	0.28785	1	11	17754	39	76974	6	5
GO:0070140	SUMO-specific isopeptidase activity	molecular_function	0.28785	1	11	17754	39	76974	6	5
GO:0016725	oxidoreductase activity, acting on CH or CH2 groups	molecular_function	0.31126	1	16	17754	60	76974	6	10
GO:0009982	pseudouridine synthase activity	molecular_function	0.31629	1	18	17754	69	76974	6	12
GO:0004332	fructose-bisphosphate aldolase activity	molecular_function	0.33186	1	11	17754	42	76974	6	5
GO:0008107	galactoside 2-alpha-L-fucosyltransferase activity	molecular_function	0.33769	1	8	17754	28	76974	6	2
GO:0031127	alpha-(1,2)-fucosyltransferase activity	molecular_function	0.33769	1	8	17754	28	76974	6	2
GO:0000077	DNA damage checkpoint	biological_process	0.34694	1	10	17754	37	76974	6	4
GO:0031570	DNA integrity checkpoint	biological_process	0.34694	1	10	17754	37	76974	6	4
GO:0048511	rhythmic process	biological_process	0.39353	1	9	17754	35	76974	6	3
GO:0009036	Type II site-specific deoxyribonuclease activity	molecular_function	0.41627	1	11	17754	44	76974	6	5
GO:0015666	restriction endodeoxyribonuclease activity	molecular_function	0.41627	1	11	17754	44	76974	6	5
GO:0043085	positive regulation of catalytic activity	biological_process	0.41771	1	6	17754	22	76974	6	0
GO:0044450	microtubule organizing center part	cellular_component	0.44206	1	8	17754	31	76974	6	2
GO:0019236	response to pheromone	biological_process	0.44673	1	11	17754	44	76974	6	5
GO:0005787	signal peptidase complex	cellular_component	0.46133	1	13	17754	54	76974	6	7
GO:0006465	signal peptide processing	biological_process	0.46133	1	13	17754	54	76974	6	7
GO:0070569	uridylyltransferase activity	molecular_function	0.4645	1	10	17754	41	76974	6	4
GO:0044093	positive regulation of molecular function	biological_process	0.51082	1	6	17754	24	76974	6	0
GO:0016776	phosphotransferase activity, phosphate group as acceptor	molecular_function	0.51639	1	15	17754	66	76974	6	9
GO:0009074	aromatic amino acid family catabolic process	biological_process	0.51657	1	6	17754	25	76974	6	0
GO:0006213	pyrimidine nucleoside metabolic process	biological_process	0.52433	1	11	17754	48	76974	6	5
GO:0030269	tetrahydromethanopterin S-methyltransferase activity	molecular_function	0.57299	1	6	17754	27	76974	6	0
GO:0042086	5-methyl-5,6,7,8-tetrahydromethanopterin-dependent methyltransferase activity	molecular_function	0.57299	1	6	17754	27	76974	6	0
GO:0003989	acetyl-CoA carboxylase activity	molecular_function	0.58871	1	11	17754	48	76974	6	5
GO:0016421	CoA carboxylase activity	molecular_function	0.58871	1	11	17754	48	76974	6	5
GO:0016885	ligase activity, forming carbon-carbon bonds	molecular_function	0.58871	1	11	17754	48	76974	6	5
GO:0006473	protein acetylation	biological_process	0.59667	1	7	17754	31	76974	6	1
GO:0006475	internal protein amino acid acetylation	biological_process	0.59667	1	7	17754	31	76974	6	1
GO:0016573	histone acetylation	biological_process	0.59667	1	7	17754	31	76974	6	1
GO:0018393	internal peptidyl-lysine acetylation	biological_process	0.59667	1	7	17754	31	76974	6	1
GO:0018394	peptidyl-lysine acetylation	biological_process	0.59667	1	7	17754	31	76974	6	1
GO:0043543	protein acylation	biological_process	0.59667	1	7	17754	31	76974	6	1
GO:0016780	phosphotransferase activity, for other substituted phosphate groups	molecular_function	0.60967	1	9	17754	41	76974	6	3
GO:0007276	gamete generation	biological_process	0.62847	1	13	17754	60	76974	6	7
GO:0032270	positive regulation of cellular protein metabolic process	biological_process	0.63303	1	8	17754	38	76974	6	2
GO:0051247	positive regulation of protein metabolic process	biological_process	0.63303	1	8	17754	38	76974	6	2
GO:0043112	receptor metabolic process	biological_process	0.64452	1	8	17754	39	76974	6	2
GO:0002098	tRNA wobble uridine modification	biological_process	0.64951	1	11	17754	50	76974	6	5
GO:0030261	chromosome condensation	biological_process	0.67989	1	7	17754	33	76974	6	1
GO:0009416	response to light stimulus	biological_process	0.688	1	15	17754	69	76974	6	9
GO:0009307	DNA restriction-modification system	biological_process	0.70516	1	10	17754	49	76974	6	4
GO:0044355	clearance of foreign intracellular DNA	biological_process	0.70516	1	10	17754	49	76974	6	4
GO:0005319	lipid transporter activity	molecular_function	0.71688	1	9	17754	47	76974	6	3
GO:0004177	aminopeptidase activity	molecular_function	0.75151	1	33	17754	154	76974	6	27
GO:0032504	multicellular organism reproduction	biological_process	0.75442	1	14	17754	70	76974	6	8
GO:0032786	positive regulation of DNA-templated transcription, elongation	biological_process	0.77552	1	9	17754	46	76974	6	3
GO:0032968	positive regulation of transcription elongation from RNA polymerase II promoter	biological_process	0.77552	1	9	17754	46	76974	6	3
GO:0034243	regulation of transcription elongation from RNA polymerase II promoter	biological_process	0.77552	1	9	17754	46	76974	6	3
GO:0033588	Elongator holoenzyme complex	cellular_component	0.77647	1	11	17754	56	76974	6	5
GO:0009086	methionine biosynthetic process	biological_process	0.78605	1	8	17754	41	76974	6	2
GO:0030118	clathrin coat	cellular_component	0.78668	1	10	17754	51	76974	6	4
GO:0048609	multicellular organismal reproductive process	biological_process	0.78708	1	13	17754	67	76974	6	7
GO:0003910	DNA ligase (ATP) activity	molecular_function	0.81868	1	11	17754	57	76974	6	5
GO:0031400	negative regulation of protein modification process	biological_process	0.83734	1	11	17754	60	76974	6	5
GO:0032784	regulation of DNA-templated transcription, elongation	biological_process	0.83813	1	9	17754	49	76974	6	3
GO:0004523	RNA-DNA hybrid ribonuclease activity	molecular_function	0.84381	1	12	17754	64	76974	6	6
GO:0004089	carbonate dehydratase activity	molecular_function	0.84981	1	10	17754	57	76974	6	4
GO:0045944	positive regulation of transcription from RNA polymerase II promoter	biological_process	0.85564	1	9	17754	50	76974	6	3
GO:0004576	oligosaccharyl transferase activity	molecular_function	0.86969	1	12	17754	67	76974	6	6
GO:0007600	sensory perception	biological_process	0.88054	1	9	17754	53	76974	6	3
GO:0050877	neurological system process	biological_process	0.88054	1	9	17754	53	76974	6	3
GO:0032507	maintenance of protein location in cell	biological_process	0.8837	1	11	17754	63	76974	6	5
GO:0045185	maintenance of protein location	biological_process	0.8837	1	11	17754	63	76974	6	5
GO:0051651	maintenance of location in cell	biological_process	0.8837	1	11	17754	63	76974	6	5
GO:0004176	ATP-dependent peptidase activity	molecular_function	0.89343	1	7	17754	42	76974	6	1
GO:0019069	viral capsid assembly	biological_process	0.90731	1	18	17754	99	76974	6	12
GO:0006265	DNA topological change	biological_process	0.91624	1	17	17754	95	76974	6	11
GO:0007031	peroxisome organization	biological_process	0.9234	1	10	17754	66	76974	6	4
GO:0030203	glycosaminoglycan metabolic process	biological_process	0.92582	1	8	17754	51	76974	6	2
GO:0016571	histone methylation	biological_process	0.92602	1	13	17754	75	76974	6	7
GO:0018022	peptidyl-lysine methylation	biological_process	0.92602	1	13	17754	75	76974	6	7
GO:0034968	histone lysine methylation	biological_process	0.92602	1	13	17754	75	76974	6	7
GO:0005337	nucleoside transmembrane transporter activity	molecular_function	0.92608	1	10	17754	62	76974	6	4
GO:0007020	microtubule nucleation	biological_process	0.92733	1	11	17754	65	76974	6	5
GO:0046785	microtubule polymerization	biological_process	0.92733	1	11	17754	65	76974	6	5
GO:0043244	regulation of protein complex disassembly	biological_process	0.9328	1	10	17754	64	76974	6	4
GO:1901677	phosphate transmembrane transporter activity	molecular_function	0.93719	1	12	17754	73	76974	6	6
GO:0042025	host cell nucleus	cellular_component	0.94126	1	15	17754	91	76974	6	9
GO:0003008	system process	biological_process	0.94311	1	9	17754	59	76974	6	3
GO:0007015	actin filament organization	biological_process	0.94949	1	13	17754	81	76974	6	7
GO:0015743	malate transport	biological_process	0.94952	1	15	17754	92	76974	6	9
GO:0004140	dephospho-CoA kinase activity	molecular_function	0.94963	1	11	17754	70	76974	6	5
GO:0033647	host intracellular organelle	cellular_component	0.9517	1	16	17754	98	76974	6	10
GO:0033648	host intracellular membrane-bounded organelle	cellular_component	0.9517	1	16	17754	98	76974	6	10
GO:0006555	methionine metabolic process	biological_process	0.95266	1	8	17754	53	76974	6	2
GO:0008083	growth factor activity	molecular_function	0.96184	1	10	17754	67	76974	6	4
GO:0016307	phosphatidylinositol phosphate kinase activity	molecular_function	0.97193	1	9	17754	62	76974	6	3
GO:0009306	protein secretion	biological_process	0.97389	1	13	17754	89	76974	6	7
GO:0016423	tRNA (guanine) methyltransferase activity	molecular_function	0.98481	1	14	17754	95	76974	6	8
GO:0043934	sporulation	biological_process	0.98523	1	12	17754	92	76974	6	6
GO:0006497	protein lipidation	biological_process	0.98598	1	22	17754	145	76974	6	16
GO:0006505	GPI anchor metabolic process	biological_process	0.98598	1	22	17754	145	76974	6	16
GO:0006506	GPI anchor biosynthetic process	biological_process	0.98598	1	22	17754	145	76974	6	16
GO:0006661	phosphatidylinositol biosynthetic process	biological_process	0.98598	1	22	17754	145	76974	6	16
GO:0042158	lipoprotein biosynthetic process	biological_process	0.98988	1	22	17754	148	76974	6	16
GO:0009401	phosphoenolpyruvate-dependent sugar phosphotransferase system	biological_process	0.99371	1	9	17754	78	76974	6	3
GO:0010639	negative regulation of organelle organization	biological_process	0.99927	1	10	17754	94	76974	6	4
GO:0051129	negative regulation of cellular component organization	biological_process	0.99982	1	10	17754	102	76974	6	4
GO:0008537	proteasome activator complex	cellular_component	0.000159	0.008099	11	17754	16	76974	5	6
GO:0009425	bacterial-type flagellum basal body	cellular_component	0.000172	0.008682	9	17754	12	76974	5	4
GO:0033743	peptide-methionine (R)-S-oxide reductase activity	molecular_function	0.010015	0.20186	7	17754	13	76974	5	2
GO:0030291	protein serine/threonine kinase inhibitor activity	molecular_function	0.016043	0.25625	9	17754	19	76974	5	4
GO:0004506	squalene monooxygenase activity	molecular_function	0.024957	0.35089	20	17754	56	76974	5	15
GO:0004860	protein kinase inhibitor activity	molecular_function	0.051525	0.55217	9	17754	23	76974	5	4
GO:0019210	kinase inhibitor activity	molecular_function	0.051525	0.55217	9	17754	23	76974	5	4
GO:0044179	hemolysis in other organism	biological_process	0.056188	0.57622	6	17754	13	76974	5	1
GO:0051715	cytolysis in other organism	biological_process	0.056188	0.57622	6	17754	13	76974	5	1
GO:0031503	protein complex localization	biological_process	0.087404	0.71996	8	17754	21	76974	5	3
GO:0034629	cellular protein complex localization	biological_process	0.087404	0.71996	8	17754	21	76974	5	3
GO:0000279	M phase	biological_process	0.099408	0.7678	6	17754	15	76974	5	1
GO:0022403	cell cycle phase	biological_process	0.099408	0.7678	6	17754	15	76974	5	1
GO:0044848	biological phase	biological_process	0.099408	0.7678	6	17754	15	76974	5	1
GO:0030145	manganese ion binding	molecular_function	0.10175	0.77948	13	17754	40	76974	5	8
GO:0031640	killing of cells of other organism	biological_process	0.10969	0.81889	6	17754	15	76974	5	1
GO:0044364	disruption of cells of other organism	biological_process	0.10969	0.81889	6	17754	15	76974	5	1
GO:0004017	adenylate kinase activity	molecular_function	0.11905	0.85877	12	17754	37	76974	5	7
GO:0045300	acyl-[acyl-carrier-protein] desaturase activity	molecular_function	0.13648	0.90373	8	17754	23	76974	5	3
GO:0006749	glutathione metabolic process	biological_process	0.14023	0.9091	6	17754	16	76974	5	1
GO:0001906	cell killing	biological_process	0.14354	0.92087	6	17754	16	76974	5	1
GO:0019835	cytolysis	biological_process	0.15834	0.9758	7	17754	20	76974	5	2
GO:0019220	regulation of phosphate metabolic process	biological_process	0.16468	0.99474	19	17754	67	76974	5	14
GO:0051174	regulation of phosphorus metabolic process	biological_process	0.16468	0.99474	19	17754	67	76974	5	14
GO:0006334	nucleosome assembly	biological_process	0.2067	1	14	17754	50	76974	5	9
GO:0031497	chromatin assembly	biological_process	0.2067	1	14	17754	50	76974	5	9
GO:0034728	nucleosome organization	biological_process	0.2067	1	14	17754	50	76974	5	9
GO:0003830	beta-1,4-mannosylglycoprotein 4-beta-N-acetylglucosaminyltransferase activity	molecular_function	0.21244	1	5	17754	14	76974	5	0
GO:0003713	transcription coactivator activity	molecular_function	0.21293	1	11	17754	38	76974	5	6
GO:0004571	mannosyl-oligosaccharide 1,2-alpha-mannosidase activity	molecular_function	0.21512	1	18	17754	63	76974	5	13
GO:0015924	mannosyl-oligosaccharide mannosidase activity	molecular_function	0.21512	1	18	17754	63	76974	5	13
GO:0008830	dTDP-4-dehydrorhamnose 3,5-epimerase activity	molecular_function	0.22068	1	5	17754	14	76974	5	0
GO:0030058	amine dehydrogenase activity	molecular_function	0.2244	1	6	17754	18	76974	5	1
GO:0004549	tRNA-specific ribonuclease activity	molecular_function	0.26428	1	10	17754	36	76974	5	5
GO:0016799	hydrolase activity, hydrolyzing N-glycosyl compounds	molecular_function	0.27391	1	13	17754	47	76974	5	8
GO:0006333	chromatin assembly or disassembly	biological_process	0.27708	1	14	17754	53	76974	5	9
GO:0005816	spindle pole body	cellular_component	0.28732	1	7	17754	23	76974	5	2
GO:0005823	central plaque of spindle pole body	cellular_component	0.28732	1	7	17754	23	76974	5	2
GO:0010942	positive regulation of cell death	biological_process	0.29372	1	9	17754	31	76974	5	4
GO:0043065	positive regulation of apoptotic process	biological_process	0.29372	1	9	17754	31	76974	5	4
GO:0043068	positive regulation of programmed cell death	biological_process	0.29372	1	9	17754	31	76974	5	4
GO:0042219	cellular modified amino acid catabolic process	biological_process	0.30063	1	6	17754	20	76974	5	1
GO:0044273	sulfur compound catabolic process	biological_process	0.30063	1	6	17754	20	76974	5	1
GO:0004526	ribonuclease P activity	molecular_function	0.30103	1	8	17754	29	76974	5	3
GO:0007219	Notch signaling pathway	biological_process	0.30452	1	7	17754	24	76974	5	2
GO:0005811	lipid particle	cellular_component	0.31162	1	5	17754	17	76974	5	0
GO:0012511	monolayer-surrounded lipid storage body	cellular_component	0.31162	1	5	17754	17	76974	5	0
GO:0004806	triglyceride lipase activity	molecular_function	0.35766	1	8	17754	29	76974	5	3
GO:0005200	structural constituent of cytoskeleton	molecular_function	0.37041	1	7	17754	25	76974	5	2
GO:0034457	Mpp10 complex	cellular_component	0.40687	1	10	17754	39	76974	5	5
GO:0009617	response to bacterium	biological_process	0.40808	1	13	17754	54	76974	5	8
GO:0042742	defense response to bacterium	biological_process	0.40808	1	13	17754	54	76974	5	8
GO:0015018	galactosylgalactosylxylosylprotein 3-beta-glucuronosyltransferase activity	molecular_function	0.41865	1	5	17754	18	76974	5	0
GO:0015020	glucuronosyltransferase activity	molecular_function	0.41865	1	5	17754	18	76974	5	0
GO:0008192	RNA guanylyltransferase activity	molecular_function	0.4778	1	9	17754	36	76974	5	4
GO:0070568	guanylyltransferase activity	molecular_function	0.4778	1	9	17754	36	76974	5	4
GO:0051205	protein insertion into membrane	biological_process	0.49253	1	11	17754	46	76974	5	6
GO:0016884	carbon-nitrogen ligase activity, with glutamine as amido-N-donor	molecular_function	0.49318	1	12	17754	49	76974	5	7
GO:0010038	response to metal ion	biological_process	0.49971	1	7	17754	29	76974	5	2
GO:0030686	90S preribosome	cellular_component	0.5077	1	10	17754	42	76974	5	5
GO:0004399	histidinol dehydrogenase activity	molecular_function	0.51497	1	5	17754	20	76974	5	0
GO:0070851	growth factor receptor binding	molecular_function	0.51874	1	9	17754	37	76974	5	4
GO:0005732	small nucleolar ribonucleoprotein complex	cellular_component	0.5358	1	10	17754	43	76974	5	5
GO:0003918	DNA topoisomerase type II (ATP-hydrolyzing) activity	molecular_function	0.57252	1	9	17754	39	76974	5	4
GO:0061505	DNA topoisomerase II activity	molecular_function	0.57252	1	9	17754	39	76974	5	4
GO:0005791	rough endoplasmic reticulum	cellular_component	0.59957	1	8	17754	36	76974	5	3
GO:0030867	rough endoplasmic reticulum membrane	cellular_component	0.59957	1	8	17754	36	76974	5	3
GO:0010638	positive regulation of organelle organization	biological_process	0.61013	1	12	17754	54	76974	5	7
GO:0005956	protein kinase CK2 complex	cellular_component	0.64703	1	5	17754	23	76974	5	0
GO:0032801	receptor catabolic process	biological_process	0.66391	1	7	17754	35	76974	5	2
GO:0016855	racemase and epimerase activity, acting on amino acids and derivatives	molecular_function	0.67211	1	9	17754	42	76974	5	4
GO:0036361	racemase activity, acting on amino acids and derivatives	molecular_function	0.67211	1	9	17754	42	76974	5	4
GO:0046677	response to antibiotic	biological_process	0.6735	1	6	17754	29	76974	5	1
GO:0051260	protein homooligomerization	biological_process	0.69487	1	8	17754	38	76974	5	3
GO:0044452	nucleolar part	cellular_component	0.72881	1	10	17754	52	76974	5	5
GO:0003714	transcription corepressor activity	molecular_function	0.73337	1	8	17754	40	76974	5	3
GO:0022618	ribonucleoprotein complex assembly	biological_process	0.74369	1	7	17754	36	76974	5	2
GO:0016670	oxidoreductase activity, acting on a sulfur group of donors, oxygen as acceptor	molecular_function	0.75387	1	7	17754	36	76974	5	2
GO:0008023	transcription elongation factor complex	cellular_component	0.76004	1	11	17754	56	76974	5	6
GO:0006109	regulation of carbohydrate metabolic process	biological_process	0.77394	1	8	17754	41	76974	5	3
GO:0004843	ubiquitin-specific protease activity	molecular_function	0.77422	1	11	17754	56	76974	5	6
GO:0006558	L-phenylalanine metabolic process	biological_process	0.79233	1	6	17754	32	76974	5	1
GO:1902221	erythrose 4-phosphate/phosphoenolpyruvate family amino acid metabolic process	biological_process	0.79233	1	6	17754	32	76974	5	1
GO:0005759	mitochondrial matrix	cellular_component	0.80507	1	8	17754	44	76974	5	3
GO:0033644	host cell membrane	cellular_component	0.80575	1	9	17754	50	76974	5	4
GO:0044218	other organism cell membrane	cellular_component	0.80575	1	9	17754	50	76974	5	4
GO:0044279	other organism membrane	cellular_component	0.80575	1	9	17754	50	76974	5	4
GO:0019076	viral release from host cell	biological_process	0.80638	1	7	17754	40	76974	5	2
GO:0003997	acyl-CoA oxidase activity	molecular_function	0.82435	1	5	17754	28	76974	5	0
GO:0006635	fatty acid beta-oxidation	biological_process	0.8457	1	5	17754	29	76974	5	0
GO:0009062	fatty acid catabolic process	biological_process	0.8457	1	5	17754	29	76974	5	0
GO:0019395	fatty acid oxidation	biological_process	0.8457	1	5	17754	29	76974	5	0
GO:0034440	lipid oxidation	biological_process	0.8457	1	5	17754	29	76974	5	0
GO:0030436	asexual sporulation	biological_process	0.86553	1	8	17754	52	76974	5	3
GO:0000723	telomere maintenance	biological_process	0.87707	1	15	17754	80	76974	5	10
GO:0032200	telomere organization	biological_process	0.87707	1	15	17754	80	76974	5	10
GO:0060249	anatomical structure homeostasis	biological_process	0.87707	1	15	17754	80	76974	5	10
GO:0006817	phosphate ion transport	biological_process	0.88425	1	10	17754	58	76974	5	5
GO:0003871	5-methyltetrahydropteroyltriglutamate-homocysteine S-methyltransferase activity	molecular_function	0.89733	1	7	17754	42	76974	5	2
GO:0042085	5-methyltetrahydropteroyltri-L-glutamate-dependent methyltransferase activity	molecular_function	0.89733	1	7	17754	42	76974	5	2
GO:0072329	monocarboxylic acid catabolic process	biological_process	0.89869	1	5	17754	32	76974	5	0
GO:0008064	regulation of actin polymerization or depolymerization	biological_process	0.91335	1	11	17754	66	76974	5	6
GO:0008154	actin polymerization or depolymerization	biological_process	0.91335	1	11	17754	66	76974	5	6
GO:0030041	actin filament polymerization	biological_process	0.91335	1	11	17754	66	76974	5	6
GO:0030832	regulation of actin filament length	biological_process	0.91335	1	11	17754	66	76974	5	6
GO:0030833	regulation of actin filament polymerization	biological_process	0.91335	1	11	17754	66	76974	5	6
GO:0032271	regulation of protein polymerization	biological_process	0.91335	1	11	17754	66	76974	5	6
GO:0032535	regulation of cellular component size	biological_process	0.91335	1	11	17754	66	76974	5	6
GO:0032956	regulation of actin cytoskeleton organization	biological_process	0.91335	1	11	17754	66	76974	5	6
GO:0032970	regulation of actin filament-based process	biological_process	0.91335	1	11	17754	66	76974	5	6
GO:0043254	regulation of protein complex assembly	biological_process	0.91335	1	11	17754	66	76974	5	6
GO:0044242	cellular lipid catabolic process	biological_process	0.91613	1	5	17754	33	76974	5	0
GO:0016634	oxidoreductase activity, acting on the CH-CH group of donors, oxygen as acceptor	molecular_function	0.92899	1	5	17754	34	76974	5	0
GO:0071826	ribonucleoprotein complex subunit organization	biological_process	0.93616	1	7	17754	47	76974	5	2
GO:0007606	sensory perception of chemical stimulus	biological_process	0.94073	1	7	17754	48	76974	5	2
GO:0090066	regulation of anatomical structure size	biological_process	0.95217	1	11	17754	71	76974	5	6
GO:0005267	potassium channel activity	molecular_function	0.95798	1	7	17754	50	76974	5	2
GO:0051348	negative regulation of transferase activity	biological_process	0.96062	1	8	17754	56	76974	5	3
GO:1902531	regulation of intracellular signal transduction	biological_process	0.97783	1	11	17754	76	76974	5	6
GO:0009069	serine family amino acid metabolic process	biological_process	0.98821	1	9	17754	68	76974	5	4
GO:0051782	negative regulation of cell division	biological_process	0.98989	1	6	17754	53	76974	5	1
GO:2001070	starch binding	molecular_function	0.99118	1	10	17754	77	76974	5	5
GO:0007093	mitotic cell cycle checkpoint	biological_process	0.99121	1	6	17754	54	76974	5	1
GO:0045930	negative regulation of mitotic cell cycle	biological_process	0.99265	1	6	17754	55	76974	5	1
GO:0008536	Ran GTPase binding	molecular_function	0.99582	1	10	17754	80	76974	5	5
GO:0006541	glutamine metabolic process	biological_process	0.99641	1	13	17754	100	76974	5	8
GO:0010948	negative regulation of cell cycle process	biological_process	0.99678	1	7	17754	66	76974	5	2
GO:0007088	regulation of mitotic nuclear division	biological_process	0.99892	1	6	17754	65	76974	5	1
GO:0007091	metaphase/anaphase transition of mitotic cell cycle	biological_process	0.99892	1	6	17754	65	76974	5	1
GO:0010965	regulation of mitotic sister chromatid separation	biological_process	0.99892	1	6	17754	65	76974	5	1
GO:0030071	regulation of mitotic metaphase/anaphase transition	biological_process	0.99892	1	6	17754	65	76974	5	1
GO:0031145	anaphase-promoting complex-dependent proteasomal ubiquitin-dependent protein catabolic process	biological_process	0.99892	1	6	17754	65	76974	5	1
GO:0032434	regulation of proteasomal ubiquitin-dependent protein catabolic process	biological_process	0.99892	1	6	17754	65	76974	5	1
GO:0033044	regulation of chromosome organization	biological_process	0.99892	1	6	17754	65	76974	5	1
GO:0033045	regulation of sister chromatid segregation	biological_process	0.99892	1	6	17754	65	76974	5	1
GO:0033047	regulation of mitotic sister chromatid segregation	biological_process	0.99892	1	6	17754	65	76974	5	1
GO:0044784	metaphase/anaphase transition of cell cycle	biological_process	0.99892	1	6	17754	65	76974	5	1
GO:0051306	mitotic sister chromatid separation	biological_process	0.99892	1	6	17754	65	76974	5	1
GO:0051783	regulation of nuclear division	biological_process	0.99892	1	6	17754	65	76974	5	1
GO:0051983	regulation of chromosome segregation	biological_process	0.99892	1	6	17754	65	76974	5	1
[truncated: 1,838 more rows]
