# Supplementary material for: <span aria-describedby="tippy-17">Transcriptomic and Metabolomic Profiling Provides Insights into Flavonoids Biosynthesis and Flower Coloring in <em>Loropetalum chinense</em> and <em>Loropetalum chinense</em> var. <em>rubrum</em>
Source: Preprints.org preprint supplement (doi:10.20944/preprints202304.0456.v1), 2023-04-18
Supplement: Supplementary file 20 [file supplementary table S26.xlsx]

## Sheet: Table S26 
	Supplementary table S26 The GO enrichment analysis of DETs between XNFJ VS XNNC group
GO_accession	Description	Term_type	Over_represented_pValue	Corrected_pValue	DEG_item	DEG_list	Bg_item	Bg_list	up	Down
GO:0005488	binding	molecular_function	7.18e-08	1.25e-05	10441	17150	45204	76974	5807	0
GO:0008152	metabolic process	biological_process	0.0092728	0.24192	8624	17150	38138	76974	4794	0
GO:0003824	catalytic activity	molecular_function	4.08e-12	1.37e-09	8682	17150	37140	76974	4780	0
GO:0009987	cellular process	biological_process	0.062219	0.72365	8004	17150	35601	76974	4394	0
GO:0071704	organic substance metabolic process	biological_process	0.2045	1	6744	17150	30055	76974	3684	0
GO:0044238	primary metabolic process	biological_process	0.21276	1	6480	17150	28867	76974	3552	0
GO:0044699	single-organism process	biological_process	0.00028267	0.016473	6171	17150	26880	76974	3351	0
GO:0097159	organic cyclic compound binding	molecular_function	8.62e-06	0.0009	5884	17150	25105	76974	3224	0
GO:1901363	heterocyclic compound binding	molecular_function	8.62e-06	0.0009	5884	17150	25105	76974	3224	0
GO:0044237	cellular metabolic process	biological_process	0.16662	1	5832	17150	25988	76974	3199	0
GO:0043167	ion binding	molecular_function	2.17e-13	8.5e-11	5713	17150	23628	76974	3156	0
GO:0043170	macromolecule metabolic process	biological_process	0.88081	1	4904	17150	22305	76974	2640	0
GO:0005515	protein binding	molecular_function	7.53e-09	1.61e-06	4518	17150	18804	76974	2618	0
GO:0044260	cellular macromolecule metabolic process	biological_process	0.66887	1	4444	17150	20056	76974	2392	0
GO:0044763	single-organism cellular process	biological_process	0.10222	0.90631	4249	17150	18770	76974	2304	0
GO:0036094	small molecule binding	molecular_function	5.48e-11	1.71e-08	3782	17150	15382	76974	2061	0
GO:0000166	nucleotide binding	molecular_function	1.92e-10	5.31e-08	3695	17150	15049	76974	2021	0
GO:1901265	nucleoside phosphate binding	molecular_function	1.92e-10	5.31e-08	3695	17150	15049	76974	2021	0
GO:0043168	anion binding	molecular_function	1.38e-08	2.81e-06	3610	17150	14833	76974	2007	0
GO:0044710	single-organism metabolic process	biological_process	3.07e-05	0.00272	3461	17150	14730	76974	1896	0
GO:0016740	transferase activity	molecular_function	4.11e-05	0.003509	3470	17150	14628	76974	1862	0
GO:0006807	nitrogen compound metabolic process	biological_process	0.99449	1	3348	17150	15693	76974	1848	0
GO:0017076	purine nucleotide binding	molecular_function	7.09e-05	0.005205	3150	17150	13106	76974	1750	0
GO:0097367	carbohydrate derivative binding	molecular_function	0.00010877	0.007739	3170	17150	13219	76974	1747	0
GO:0032553	ribonucleotide binding	molecular_function	6.78e-05	0.005136	3148	17150	13096	76974	1744	0
GO:0032555	purine ribonucleotide binding	molecular_function	6.07e-05	0.00475	3127	17150	12997	76974	1735	0
GO:0001883	purine nucleoside binding	molecular_function	5.97e-05	0.00475	3126	17150	12992	76974	1734	0
GO:0032549	ribonucleoside binding	molecular_function	5.97e-05	0.00475	3126	17150	12992	76974	1734	0
GO:0032550	purine ribonucleoside binding	molecular_function	5.97e-05	0.00475	3126	17150	12992	76974	1734	0
GO:0001882	nucleoside binding	molecular_function	6.48e-05	0.004988	3126	17150	12996	76974	1734	0
GO:0016020	membrane	cellular_component	0.87583	1	3192	17150	14698	76974	1728	0
GO:0034641	cellular nitrogen compound metabolic process	biological_process	0.99929	1	3074	17150	14584	76974	1715	0
GO:0030554	adenyl nucleotide binding	molecular_function	6.96e-06	0.000797	2964	17150	12188	76974	1647	0
GO:0032559	adenyl ribonucleotide binding	molecular_function	8.44e-06	0.0009	2946	17150	12116	76974	1634	0
GO:0016787	hydrolase activity	molecular_function	0.51522	1	2885	17150	12931	76974	1617	0
GO:0009058	biosynthetic process	biological_process	0.98175	1	2937	17150	13737	76974	1609	0
GO:0005623	cell	cellular_component	0.99796	1	2831	17150	13510	76974	1600	0
GO:0044464	cell part	cellular_component	0.99796	1	2831	17150	13510	76974	1600	0
GO:1901360	organic cyclic compound metabolic process	biological_process	0.88951	1	2906	17150	13346	76974	1586	0
GO:0035639	purine ribonucleoside triphosphate binding	molecular_function	0.0033346	0.10951	2900	17150	12238	76974	1555	0
GO:0019538	protein metabolic process	biological_process	0.056557	0.69345	2849	17150	12439	76974	1523	0
GO:1901576	organic substance biosynthetic process	biological_process	0.98925	1	2771	17150	13027	76974	1512	0
GO:0006725	cellular aromatic compound metabolic process	biological_process	0.99884	1	2726	17150	12874	76974	1502	0
GO:0046483	heterocycle metabolic process	biological_process	0.99924	1	2712	17150	12836	76974	1497	0
GO:0005622	intracellular	cellular_component	0.99336	1	2608	17150	12395	76974	1466	0
GO:0005524	ATP binding	molecular_function	0.0019635	0.076263	2700	17150	11323	76974	1441	0
GO:0044249	cellular biosynthetic process	biological_process	0.99991	1	2592	17150	12484	76974	1425	0
GO:0044424	intracellular part	cellular_component	0.99581	1	2512	17150	11984	76974	1413	0
GO:0006139	nucleobase-containing compound metabolic process	biological_process	0.99981	1	2500	17150	11932	76974	1372	0
GO:0044267	cellular protein metabolic process	biological_process	0.010529	0.26442	2360	17150	10134	76974	1264	0
GO:0043169	cation binding	molecular_function	2e-05	0.00191	2311	17150	9614	76974	1260	0
GO:0003676	nucleic acid binding	molecular_function	0.87166	1	2363	17150	10810	76974	1251	0
GO:0046872	metal ion binding	molecular_function	2.08e-05	0.00191	2285	17150	9505	76974	1250	0
GO:0090304	nucleic acid metabolic process	biological_process	0.99944	1	2226	17150	10608	76974	1228	0
GO:0065007	biological regulation	biological_process	0.23621	1	2148	17150	9595	76974	1219	0
GO:0051179	localization	biological_process	0.8747	1	2281	17150	10461	76974	1192	0
GO:0050789	regulation of biological process	biological_process	0.087634	0.84082	2078	17150	9149	76974	1177	0
GO:0051234	establishment of localization	biological_process	0.90148	1	2218	17150	10203	76974	1162	0
GO:0006810	transport	biological_process	0.89491	1	2210	17150	10160	76974	1156	0
GO:0050794	regulation of cellular process	biological_process	0.014892	0.32738	2032	17150	8795	76974	1153	0
GO:0010467	gene expression	biological_process	0.99947	1	2060	17150	9927	76974	1136	0
GO:0043226	organelle	cellular_component	0.95734	1	1979	17150	9327	76974	1072	907
GO:0043229	intracellular organelle	cellular_component	0.96781	1	1941	17150	9177	76974	1055	886
GO:0016772	transferase activity, transferring phosphorus-containing groups	molecular_function	0.0017038	0.067804	2063	17150	8634	76974	1049	1014
GO:0009059	macromolecule biosynthetic process	biological_process	0.99998	1	1929	17150	9486	76974	1040	889
GO:0044271	cellular nitrogen compound biosynthetic process	biological_process	0.99972	1	1866	17150	9067	76974	1036	830
GO:0044425	membrane part	cellular_component	1	1	1847	17150	9233	76974	1036	811
GO:0034645	cellular macromolecule biosynthetic process	biological_process	0.99999	1	1903	17150	9387	76974	1027	876
GO:0055114	oxidation-reduction process	biological_process	2.1e-10	5.47e-08	1806	17150	7221	76974	984	822
GO:0043412	macromolecule modification	biological_process	0.000504	0.02519	1907	17150	7909	76974	977	930
GO:0016491	oxidoreductase activity	molecular_function	3.26e-12	1.18e-09	1746	17150	6885	76974	965	781
GO:0016070	RNA metabolic process	biological_process	0.99593	1	1718	17150	8141	76974	922	796
GO:0050896	response to stimulus	biological_process	0.0004049	0.02211	1597	17150	6765	76974	905	692
GO:0006464	cellular protein modification process	biological_process	2.2e-06	0.000265	1751	17150	7035	76974	887	864
GO:0036211	protein modification process	biological_process	2.2e-06	0.000265	1751	17150	7035	76974	887	864
GO:1901362	organic cyclic compound biosynthetic process	biological_process	0.38096	1	1682	17150	7560	76974	887	795
GO:0032991	macromolecular complex	cellular_component	0.99819	1	1516	17150	7430	76974	873	643
GO:0006796	phosphate-containing compound metabolic process	biological_process	0.00052658	0.025493	1720	17150	7094	76974	867	853
GO:0006793	phosphorus metabolic process	biological_process	0.00054713	0.026217	1720	17150	7096	76974	867	853
GO:0016301	kinase activity	molecular_function	3.45e-06	0.000406	1686	17150	6739	76974	855	831
GO:1902578	single-organism localization	biological_process	0.91937	1	1636	17150	7563	76974	843	793
GO:0043227	membrane-bounded organelle	cellular_component	0.96303	1	1542	17150	7267	76974	840	702
GO:0043231	intracellular membrane-bounded organelle	cellular_component	0.96338	1	1541	17150	7263	76974	839	702
GO:0044765	single-organism transport	biological_process	0.90381	1	1617	17150	7461	76974	832	785
GO:0018130	heterocycle biosynthetic process	biological_process	0.99032	1	1485	17150	7062	76974	796	689
GO:0019438	aromatic compound biosynthetic process	biological_process	0.97925	1	1481	17150	6998	76974	792	689
GO:0016773	phosphotransferase activity, alcohol group as acceptor	molecular_function	2.11e-05	0.00191	1570	17150	6303	76974	787	783
GO:0046914	transition metal ion binding	molecular_function	0.13661	1	1396	17150	6057	76974	773	623
GO:0031224	intrinsic component of membrane	cellular_component	0.99996	1	1407	17150	7019	76974	759	648
GO:0016021	integral component of membrane	cellular_component	0.99996	1	1401	17150	6991	76974	753	648
GO:0003677	DNA binding	molecular_function	0.74471	1	1356	17150	6205	76974	713	643
GO:1901564	organonitrogen compound metabolic process	biological_process	0.69139	1	1260	17150	5813	76974	701	559
GO:0043234	protein complex	cellular_component	0.99855	1	1220	17150	5977	76974	699	521
GO:0016310	phosphorylation	biological_process	1.41e-05	0.001381	1381	17150	5495	76974	692	689
GO:0034654	nucleobase-containing compound biosynthetic process	biological_process	0.98759	1	1304	17150	6217	76974	689	615
GO:0004672	protein kinase activity	molecular_function	1.41e-05	0.001381	1381	17150	5485	76974	687	694
GO:0051716	cellular response to stimulus	biological_process	0.026155	0.47979	1132	17150	4862	76974	657	475
GO:0006468	protein phosphorylation	biological_process	9.17e-07	0.00012	1305	17150	5102	76974	653	652
GO:0005737	cytoplasm	cellular_component	0.99547	1	1154	17150	5704	76974	648	506
GO:0019222	regulation of metabolic process	biological_process	0.72108	1	1159	17150	5278	76974	639	520
GO:0031323	regulation of cellular metabolic process	biological_process	0.41427	1	1121	17150	4990	76974	617	504
GO:0032774	RNA biosynthetic process	biological_process	0.95768	1	1175	17150	5539	76974	610	565
GO:0006351	transcription, DNA-templated	biological_process	0.97378	1	1148	17150	5446	76974	595	553
GO:0097659	nucleic acid-templated transcription	biological_process	0.97378	1	1148	17150	5446	76974	595	553
GO:0060255	regulation of macromolecule metabolic process	biological_process	0.81497	1	1081	17150	4965	76974	588	493
GO:0005215	transporter activity	molecular_function	0.53034	1	1151	17150	5219	76974	587	564
GO:0005634	nucleus	cellular_component	0.59341	1	1100	17150	4996	76974	583	517
GO:0080090	regulation of primary metabolic process	biological_process	0.65167	1	1065	17150	4816	76974	581	484
GO:0010468	regulation of gene expression	biological_process	0.79502	1	1045	17150	4792	76974	563	482
GO:0051171	regulation of nitrogen compound metabolic process	biological_process	0.56908	1	1032	17150	4640	76974	561	471
GO:0009889	regulation of biosynthetic process	biological_process	0.58021	1	1027	17150	4621	76974	555	472
GO:0010556	regulation of macromolecule biosynthetic process	biological_process	0.60207	1	1025	17150	4619	76974	554	471
GO:0031326	regulation of cellular biosynthetic process	biological_process	0.60207	1	1025	17150	4619	76974	554	471
GO:0044281	small molecule metabolic process	biological_process	0.62322	1	957	17150	4319	76974	546	411
GO:2000112	regulation of cellular macromolecule biosynthetic process	biological_process	0.66205	1	1012	17150	4581	76974	543	469
GO:0016817	hydrolase activity, acting on acid anhydrides	molecular_function	0.088748	0.84194	1002	17150	4281	76974	541	461
GO:0007154	cell communication	biological_process	6.96e-05	0.005191	942	17150	3808	76974	529	413
GO:0071840	cellular component organization or biogenesis	biological_process	0.61563	1	928	17150	4217	76974	528	400
GO:0008270	zinc ion binding	molecular_function	0.62984	1	962	17150	4305	76974	525	437
GO:1901566	organonitrogen compound biosynthetic process	biological_process	0.97731	1	887	17150	4300	76974	521	366
GO:0044711	single-organism biosynthetic process	biological_process	0.051883	0.66848	951	17150	4096	76974	517	434
GO:0016818	hydrolase activity, acting on acid anhydrides, in phosphorus-containing anhydrides	molecular_function	0.045399	0.63262	955	17150	4030	76974	515	440
GO:0019219	regulation of nucleobase-containing compound metabolic process	biological_process	0.32675	1	967	17150	4282	76974	515	452
GO:0051252	regulation of RNA metabolic process	biological_process	0.31513	1	960	17150	4247	76974	508	452
GO:2001141	regulation of RNA biosynthetic process	biological_process	0.31513	1	960	17150	4247	76974	508	452
GO:0044444	cytoplasmic part	cellular_component	0.98697	1	897	17150	4434	76974	507	390
GO:0044422	organelle part	cellular_component	0.99983	1	951	17150	4767	76974	505	446
GO:0044446	intracellular organelle part	cellular_component	0.99969	1	949	17150	4736	76974	504	445
GO:0016462	pyrophosphatase activity	molecular_function	0.062827	0.72365	920	17150	3892	76974	502	418
GO:0006355	regulation of transcription, DNA-templated	biological_process	0.37475	1	947	17150	4209	76974	497	450
GO:1903506	regulation of nucleic acid-templated transcription	biological_process	0.37475	1	947	17150	4209	76974	497	450
GO:0055085	transmembrane transport	biological_process	0.42986	1	984	17150	4369	76974	492	492
GO:0017111	nucleoside-triphosphatase activity	molecular_function	0.049388	0.65022	889	17150	3744	76974	487	402
GO:0044700	single organism signaling	biological_process	0.00047608	0.02519	827	17150	3379	76974	486	341
GO:0023052	signaling	biological_process	0.00051129	0.02519	827	17150	3381	76974	486	341
GO:0016043	cellular component organization	biological_process	0.54926	1	851	17150	3848	76974	486	365
GO:0007165	signal transduction	biological_process	0.00030555	0.017498	824	17150	3354	76974	485	339
GO:0005975	carbohydrate metabolic process	biological_process	0.90868	1	861	17150	3991	76974	485	376
GO:0022857	transmembrane transporter activity	molecular_function	0.69479	1	934	17150	4273	76974	483	451
GO:0043531	ADP binding	molecular_function	1.35e-15	7.25e-13	564	17150	1831	76974	422	142
GO:0048037	cofactor binding	molecular_function	4.49e-15	2.11e-12	782	17150	2751	76974	413	369
GO:0006082	organic acid metabolic process	biological_process	0.0697	0.74952	701	17150	2963	76974	400	301
GO:0006259	DNA metabolic process	biological_process	0.9758	1	688	17150	3316	76974	400	288
GO:0043436	oxoacid metabolic process	biological_process	0.064114	0.73168	700	17150	2954	76974	399	301
GO:0006629	lipid metabolic process	biological_process	9.1e-15	3.89e-12	718	17150	2512	76974	396	322
GO:0006811	ion transport	biological_process	0.81552	1	739	17150	3449	76974	396	343
GO:0019752	carboxylic acid metabolic process	biological_process	0.085157	0.82464	685	17150	2903	76974	395	290
GO:0071702	organic substance transport	biological_process	0.99865	1	724	17150	3599	76974	392	332
GO:0033036	macromolecule localization	biological_process	0.99532	1	658	17150	3238	76974	365	293
GO:0016788	hydrolase activity, acting on ester bonds	molecular_function	0.0059724	0.17291	636	17150	2614	76974	353	283
GO:0022892	substrate-specific transporter activity	molecular_function	0.88977	1	666	17150	3166	76974	351	315
GO:0051641	cellular localization	biological_process	0.99564	1	633	17150	3091	76974	347	286
GO:0006508	proteolysis	biological_process	0.90386	1	622	17150	2926	76974	345	277
GO:0050662	coenzyme binding	molecular_function	2.51e-17	1.69e-14	667	17150	2249	76974	340	327
GO:0006950	response to stress	biological_process	0.074204	0.7659	654	17150	2838	76974	340	314
GO:0051649	establishment of localization in cell	biological_process	0.99434	1	602	17150	2936	76974	331	271
GO:0008104	protein localization	biological_process	0.99177	1	588	17150	2877	76974	330	258
GO:0008233	peptidase activity	molecular_function	0.99971	1	582	17150	2992	76974	325	257
GO:0043603	cellular amide metabolic process	biological_process	0.94657	1	519	17150	2552	76974	323	196
GO:0003723	RNA binding	molecular_function	0.65103	1	610	17150	2765	76974	321	289
GO:0043228	non-membrane-bounded organelle	cellular_component	0.93404	1	580	17150	2836	76974	321	259
GO:0022891	substrate-specific transmembrane transporter activity	molecular_function	0.85711	1	605	17150	2859	76974	320	285
GO:0043232	intracellular non-membrane-bounded organelle	cellular_component	0.8832	1	574	17150	2777	76974	320	254
GO:0045184	establishment of protein localization	biological_process	0.99104	1	565	17150	2766	76974	320	245
GO:0015031	protein transport	biological_process	0.98963	1	557	17150	2723	76974	314	243
GO:0098796	membrane protein complex	cellular_component	0.99053	1	484	17150	2439	76974	307	177
GO:0019001	guanyl nucleotide binding	molecular_function	0.00063579	0.029561	580	17150	2293	76974	306	274
GO:0015075	ion transmembrane transporter activity	molecular_function	0.85856	1	579	17150	2732	76974	305	274
GO:0043604	amide biosynthetic process	biological_process	0.96446	1	490	17150	2431	76974	305	185
GO:0070011	peptidase activity, acting on L-amino acid peptides	molecular_function	0.99796	1	549	17150	2752	76974	305	244
GO:0032561	guanyl ribonucleotide binding	molecular_function	0.00028414	0.016473	575	17150	2253	76974	304	271
GO:0005525	GTP binding	molecular_function	0.00031363	0.017745	573	17150	2247	76974	303	270
GO:0046907	intracellular transport	biological_process	0.9783	1	551	17150	2650	76974	301	250
GO:0016887	ATPase activity	molecular_function	0.23478	1	563	17150	2414	76974	294	269
GO:0009056	catabolic process	biological_process	0.13206	1	545	17150	2359	76974	288	257
GO:0006518	peptide metabolic process	biological_process	0.98494	1	458	17150	2318	76974	281	177
GO:0006812	cation transport	biological_process	0.92864	1	513	17150	2470	76974	278	235
GO:0034613	cellular protein localization	biological_process	0.84771	1	495	17150	2293	76974	276	219
GO:0070727	cellular macromolecule localization	biological_process	0.84771	1	495	17150	2293	76974	276	219
GO:0043043	peptide biosynthetic process	biological_process	0.98709	1	443	17150	2252	76974	272	171
GO:0044085	cellular component biogenesis	biological_process	0.035052	0.56564	453	17150	1894	76974	270	183
GO:0006412	translation	biological_process	0.98666	1	437	17150	2223	76974	269	168
GO:0051704	multi-organism process	biological_process	0.93658	1	482	17150	2339	76974	267	215
GO:0016757	transferase activity, transferring glycosyl groups	molecular_function	0.12434	1	483	17150	2057	76974	264	219
GO:0016798	hydrolase activity, acting on glycosyl bonds	molecular_function	0.4768	1	431	17150	1916	76974	264	167
GO:0006886	intracellular protein transport	biological_process	0.80786	1	464	17150	2137	76974	260	204
GO:0006396	RNA processing	biological_process	0.70882	1	458	17150	2084	76974	254	204
GO:0004553	hydrolase activity, hydrolyzing O-glycosyl compounds	molecular_function	0.59344	1	409	17150	1841	76974	251	158
GO:0003924	GTPase activity	molecular_function	1.12e-07	1.88e-05	454	17150	1638	76974	250	204
GO:0006996	organelle organization	biological_process	0.97901	1	446	17150	2182	76974	246	200
GO:0016614	oxidoreductase activity, acting on CH-OH group of donors	molecular_function	1.39e-15	7.25e-13	445	17150	1429	76974	237	208
GO:0043933	macromolecular complex subunit organization	biological_process	0.0017552	0.069262	390	17150	1542	76974	231	159
GO:0016829	lyase activity	molecular_function	0.047995	0.6458	347	17150	1444	76974	231	116
GO:0016616	oxidoreductase activity, acting on the CH-OH group of donors, NAD or NADP as acceptor	molecular_function	6.06e-20	4.75e-17	428	17150	1295	76974	226	202
GO:0034660	ncRNA metabolic process	biological_process	0.91217	1	398	17150	1869	76974	226	172
GO:0022607	cellular component assembly	biological_process	0.010348	0.26268	371	17150	1502	76974	225	146
GO:0008324	cation transmembrane transporter activity	molecular_function	0.96149	1	403	17150	1991	76974	220	183
GO:0006520	cellular amino acid metabolic process	biological_process	0.44655	1	397	17150	1748	76974	219	178
GO:1902494	catalytic complex	cellular_component	0.87662	1	397	17150	1915	76974	219	178
GO:0005198	structural molecule activity	molecular_function	0.61161	1	402	17150	1920	76974	217	185
GO:0016192	vesicle-mediated transport	biological_process	0.77815	1	380	17150	1729	76974	217	163
GO:1901135	carbohydrate derivative metabolic process	biological_process	0.8186	1	424	17150	2000	76974	214	210
GO:0008610	lipid biosynthetic process	biological_process	1.78e-08	3.47e-06	384	17150	1357	76974	213	171
GO:0044255	cellular lipid metabolic process	biological_process	0.02281	0.43542	359	17150	1461	76974	211	148
GO:0016758	transferase activity, transferring hexosyl groups	molecular_function	0.057338	0.69973	385	17150	1604	76974	210	175
GO:0044248	cellular catabolic process	biological_process	0.5563	1	400	17150	1820	76974	210	190
GO:0022890	inorganic cation transmembrane transporter activity	molecular_function	0.80364	1	377	17150	1794	76974	208	169
GO:0044723	single-organism carbohydrate metabolic process	biological_process	0.54569	1	422	17150	1896	76974	205	217
GO:0044283	small molecule biosynthetic process	biological_process	0.10047	0.89969	348	17150	1460	76974	202	146
GO:0071822	protein complex subunit organization	biological_process	0.00092958	0.038976	310	17150	1188	76974	197	113
GO:1901575	organic substance catabolic process	biological_process	0.23969	1	367	17150	1606	76974	197	170
GO:0044428	nuclear part	cellular_component	0.98265	1	399	17150	1993	76974	196	203
GO:0016741	transferase activity, transferring one-carbon groups	molecular_function	0.97951	1	309	17150	1544	76974	195	114
GO:0006399	tRNA metabolic process	biological_process	0.90641	1	343	17150	1611	76974	194	149
GO:0019637	organophosphate metabolic process	biological_process	0.95733	1	361	17150	1762	76974	193	168
GO:0008168	methyltransferase activity	molecular_function	0.96156	1	299	17150	1477	76974	193	106
GO:0065003	macromolecular complex assembly	biological_process	0.00066333	0.030539	296	17150	1125	76974	187	109
GO:0030529	ribonucleoprotein complex	cellular_component	0.81767	1	313	17150	1564	76974	183	130
GO:0006461	protein complex assembly	biological_process	0.00026367	0.01608	289	17150	1079	76974	182	107
GO:0070271	protein complex biogenesis	biological_process	0.00028171	0.016473	289	17150	1080	76974	182	107
GO:0005506	iron ion binding	molecular_function	0.0027173	0.096671	315	17150	1224	76974	181	134
GO:0033554	cellular response to stress	biological_process	0.942	1	322	17150	1563	76974	181	141
GO:0016705	oxidoreductase activity, acting on paired donors, with incorporation or reduction of molecular oxygen	molecular_function	1.22e-07	1.97e-05	308	17150	1064	76974	176	132
GO:0030001	metal ion transport	biological_process	0.036658	0.58176	322	17150	1352	76974	176	146
GO:0016053	organic acid biosynthetic process	biological_process	0.0414	0.62513	287	17150	1165	76974	174	113
GO:0046394	carboxylic acid biosynthetic process	biological_process	0.0414	0.62513	287	17150	1165	76974	174	113
GO:0006974	cellular response to DNA damage stimulus	biological_process	0.91433	1	305	17150	1460	76974	173	132
GO:0005576	extracellular region	cellular_component	0.76593	1	294	17150	1390	76974	170	124
GO:0012505	endomembrane system	cellular_component	0.99912	1	287	17150	1520	76974	170	117
GO:0046906	tetrapyrrole binding	molecular_function	0.0030489	0.10606	300	17150	1170	76974	169	131
GO:0035556	intracellular signal transduction	biological_process	0.24268	1	303	17150	1316	76974	168	135
GO:0034470	ncRNA processing	biological_process	0.29114	1	301	17150	1302	76974	168	133
GO:0020037	heme binding	molecular_function	0.001131	0.047	297	17150	1139	76974	167	130
GO:0031090	organelle membrane	cellular_component	0.99955	1	302	17150	1629	76974	167	135
GO:0016746	transferase activity, transferring acyl groups	molecular_function	0.0083204	0.22075	264	17150	1045	76974	166	98
GO:0003700	transcription factor activity, sequence-specific DNA binding	molecular_function	0.40417	1	357	17150	1587	76974	165	192
GO:0001071	nucleic acid binding transcription factor activity	molecular_function	0.41686	1	358	17150	1594	76974	165	193
GO:0006281	DNA repair	biological_process	0.94121	1	288	17150	1392	76974	164	124
GO:0044877	macromolecular complex binding	molecular_function	0.73069	1	255	17150	1177	76974	161	94
GO:0015672	monovalent inorganic cation transport	biological_process	0.98677	1	297	17150	1501	76974	161	136
GO:0051186	cofactor metabolic process	biological_process	0.013852	0.31732	298	17150	1190	76974	160	138
GO:0004175	endopeptidase activity	molecular_function	1	1	285	17150	1639	76974	160	125
GO:0032787	monocarboxylic acid metabolic process	biological_process	0.025127	0.46952	269	17150	1073	76974	156	113
GO:0005509	calcium ion binding	molecular_function	0.00025405	0.015907	286	17150	1082	76974	153	133
GO:0071944	cell periphery	cellular_component	0.96083	1	250	17150	1257	76974	152	98
GO:0034622	cellular macromolecular complex assembly	biological_process	0.0076065	0.20411	233	17150	910	76974	150	83
GO:0008236	serine-type peptidase activity	molecular_function	0.59419	1	265	17150	1205	76974	147	118
GO:0017171	serine hydrolase activity	molecular_function	0.59419	1	265	17150	1205	76974	147	118
GO:0016874	ligase activity	molecular_function	0.97136	1	235	17150	1149	76974	147	88
GO:0044764	multi-organism cellular process	biological_process	0.40469	1	256	17150	1160	76974	145	111
GO:0016779	nucleotidyltransferase activity	molecular_function	0.98661	1	281	17150	1436	76974	142	139
GO:0098772	molecular function regulator	molecular_function	0.65994	1	211	17150	985	76974	140	71
GO:0065008	regulation of biological quality	biological_process	0.93506	1	241	17150	1225	76974	140	101
GO:0006260	DNA replication	biological_process	0.98806	1	236	17150	1228	76974	140	96
GO:0004842	ubiquitin-protein transferase activity	molecular_function	1.73e-07	2.61e-05	278	17150	949	76974	136	142
GO:0019787	ubiquitin-like protein transferase activity	molecular_function	1.73e-07	2.61e-05	278	17150	949	76974	136	142
GO:0008033	tRNA processing	biological_process	0.21818	1	246	17150	1044	76974	136	110
GO:1902582	single-organism intracellular transport	biological_process	0.9911	1	272	17150	1385	76974	136	136
GO:0055086	nucleobase-containing small molecule metabolic process	biological_process	0.96181	1	254	17150	1269	76974	134	120
GO:0043623	cellular protein complex assembly	biological_process	0.0048425	0.14913	213	17150	814	76974	133	80
GO:0046983	protein dimerization activity	molecular_function	0.78589	1	216	17150	1011	76974	132	84
GO:1901137	carbohydrate derivative biosynthetic process	biological_process	0.97735	1	236	17150	1205	76974	132	104
GO:0044419	interspecies interaction between organisms	biological_process	0.87909	1	234	17150	1146	76974	130	104
GO:0098588	bounding membrane of organelle	cellular_component	0.99995	1	230	17150	1304	76974	130	100
GO:0022804	active transmembrane transporter activity	molecular_function	0.11007	0.96052	275	17150	1145	76974	129	146
GO:0016747	transferase activity, transferring acyl groups other than amino-acyl groups	molecular_function	0.00072301	0.031731	199	17150	731	76974	128	71
GO:0004386	helicase activity	molecular_function	0.50047	1	268	17150	1175	76974	128	140
GO:0044403	symbiosis, encompassing mutualism through parasitism	biological_process	0.90129	1	232	17150	1144	76974	128	104
GO:0030234	enzyme regulator activity	molecular_function	0.27283	1	193	17150	849	76974	127	66
GO:0032403	protein complex binding	molecular_function	0.41858	1	205	17150	902	76974	127	78
GO:0003735	structural constituent of ribosome	molecular_function	0.70275	1	216	17150	1095	76974	127	89
GO:0005840	ribosome	cellular_component	0.70681	1	215	17150	1090	76974	127	88
GO:0015077	monovalent inorganic cation transmembrane transporter activity	molecular_function	0.96189	1	233	17150	1176	76974	126	107
GO:0016835	carbon-oxygen lyase activity	molecular_function	8.52e-06	0.0009	165	17150	541	76974	125	40
GO:0019012	virion	cellular_component	0.41427	1	207	17150	919	76974	125	82
GO:1990234	transferase complex	cellular_component	0.83205	1	273	17150	1309	76974	124	149
GO:0032501	multicellular organismal process	biological_process	0.36658	1	243	17150	1065	76974	123	120
GO:0006310	DNA recombination	biological_process	0.5048	1	222	17150	985	76974	123	99
GO:0034220	ion transmembrane transport	biological_process	0.99537	1	243	17150	1280	76974	123	120
GO:1902589	single-organism organelle organization	biological_process	0.97363	1	227	17150	1134	76974	122	105
GO:0051287	NAD binding	molecular_function	1.56e-09	3.66e-07	244	17150	782	76974	121	123
GO:0006631	fatty acid metabolic process	biological_process	0.028348	0.50764	194	17150	760	76974	121	73
GO:1901605	alpha-amino acid metabolic process	biological_process	0.084657	0.82464	215	17150	882	76974	121	94
GO:0006091	generation of precursor metabolites and energy	biological_process	0.06005	0.71572	189	17150	767	76974	120	69
GO:0009117	nucleotide metabolic process	biological_process	0.93794	1	221	17150	1091	76974	120	101
GO:0006753	nucleoside phosphate metabolic process	biological_process	0.94117	1	221	17150	1093	76974	120	101
GO:0016032	viral process	biological_process	0.1635	1	216	17150	915	76974	119	97
GO:0046873	metal ion transmembrane transporter activity	molecular_function	0.72516	1	212	17150	1009	76974	119	93
GO:0005694	chromosome	cellular_component	0.53144	1	198	17150	891	76974	118	80
GO:0044423	virion part	cellular_component	0.41515	1	198	17150	879	76974	117	81
GO:0042221	response to chemical	biological_process	0.0006991	0.031682	195	17150	724	76974	116	79
GO:0042578	phosphoric ester hydrolase activity	molecular_function	0.002819	0.099535	238	17150	895	76974	115	123
GO:0008092	cytoskeletal protein binding	molecular_function	0.59167	1	214	17150	962	76974	115	99
GO:0007049	cell cycle	biological_process	0.71608	1	222	17150	1036	76974	114	108
GO:0050660	flavin adenine dinucleotide binding	molecular_function	0.0019879	0.076263	197	17150	724	76974	113	84
GO:0006732	coenzyme metabolic process	biological_process	0.043431	0.62513	206	17150	826	76974	113	93
GO:0015979	photosynthesis	biological_process	0.020539	0.41043	124	17150	504	76974	111	13
GO:0051276	chromosome organization	biological_process	0.40095	1	213	17150	945	76974	108	105
GO:0090407	organophosphate biosynthetic process	biological_process	0.99922	1	194	17150	1069	76974	108	86
GO:0016853	isomerase activity	molecular_function	0.27822	1	198	17150	879	76974	107	91
GO:0004871	signal transducer activity	molecular_function	0.94008	1	209	17150	1049	76974	106	103
GO:0060089	molecular transducer activity	molecular_function	0.96983	1	211	17150	1078	76974	106	105
GO:0044262	cellular carbohydrate metabolic process	biological_process	0.77267	1	201	17150	944	76974	104	97
GO:0008652	cellular amino acid biosynthetic process	biological_process	0.0061433	0.17291	189	17150	716	76974	102	87
GO:0043565	sequence-specific DNA binding	molecular_function	0.012614	0.29581	231	17150	907	76974	101	130
GO:0019693	ribose phosphate metabolic process	biological_process	0.94544	1	184	17150	923	76974	101	83
GO:0016482	cytoplasmic transport	biological_process	0.90822	1	188	17150	922	76974	99	89
GO:0072521	purine-containing compound metabolic process	biological_process	0.9953	1	173	17150	927	76974	99	74
GO:0051188	cofactor biosynthetic process	biological_process	0.32459	1	175	17150	756	76974	98	77
GO:0030117	membrane coat	cellular_component	0.66323	1	161	17150	736	76974	98	63
GO:0048475	coated membrane	cellular_component	0.66323	1	161	17150	736	76974	98	63
GO:0004518	nuclease activity	molecular_function	0.69031	1	175	17150	818	76974	98	77
GO:0044427	chromosomal part	cellular_component	0.77751	1	163	17150	770	76974	98	65
GO:0009116	nucleoside metabolic process	biological_process	0.99274	1	189	17150	1003	76974	98	91
GO:1901657	glycosyl compound metabolic process	biological_process	0.99308	1	189	17150	1004	76974	98	91
GO:0098662	inorganic cation transmembrane transport	biological_process	0.99904	1	187	17150	1040	76974	97	90
GO:0098660	inorganic ion transmembrane transport	biological_process	0.99909	1	187	17150	1041	76974	97	90
GO:0098655	cation transmembrane transport	biological_process	0.99923	1	187	17150	1044	76974	97	90
GO:0007264	small GTPase mediated signal transduction	biological_process	0.25299	1	162	17150	702	76974	96	66
GO:0006820	anion transport	biological_process	0.49195	1	178	17150	799	76974	96	82
GO:0009150	purine ribonucleotide metabolic process	biological_process	0.98999	1	165	17150	873	76974	95	70
GO:0009259	ribonucleotide metabolic process	biological_process	0.99066	1	166	17150	880	76974	95	71
GO:0006163	purine nucleotide metabolic process	biological_process	0.99366	1	167	17150	892	76974	95	72
GO:0031974	membrane-enclosed lumen	cellular_component	1	1	192	17150	1215	76974	94	98
GO:0006694	steroid biosynthetic process	biological_process	1.47e-23	6.91e-20	189	17150	439	76974	93	96
GO:0008202	steroid metabolic process	biological_process	1.73e-22	1.63e-19	189	17150	448	76974	93	96
GO:0000287	magnesium ion binding	molecular_function	3.26e-05	0.002831	138	17150	451	76974	93	45
GO:0043233	organelle lumen	cellular_component	1	1	191	17150	1207	76974	93	98
GO:0070013	intracellular organelle lumen	cellular_component	1	1	191	17150	1207	76974	93	98
GO:0019028	viral capsid	cellular_component	0.20021	1	158	17150	669	76974	92	66
GO:0006914	autophagy	biological_process	0.22708	1	181	17150	774	76974	92	89
GO:0005856	cytoskeleton	cellular_component	0.8911	1	175	17150	842	76974	90	85
GO:0003854	3-beta-hydroxy-delta5-steroid dehydrogenase activity	molecular_function	7.92e-23	9.3e-20	184	17150	428	76974	89	95
GO:0016229	steroid dehydrogenase activity	molecular_function	7.92e-23	9.3e-20	184	17150	428	76974	89	95
GO:0033764	steroid dehydrogenase activity, acting on the CH-OH group of donors, NAD or NADP as acceptor	molecular_function	7.92e-23	9.3e-20	184	17150	428	76974	89	95
GO:0009057	macromolecule catabolic process	biological_process	0.94043	1	169	17150	853	76974	89	80
GO:0015078	hydrogen ion transmembrane transporter activity	molecular_function	0.80065	1	165	17150	795	76974	88	77
GO:0009119	ribonucleoside metabolic process	biological_process	0.99895	1	159	17150	893	76974	88	71
GO:1901607	alpha-amino acid biosynthetic process	biological_process	0.019454	0.40068	162	17150	625	76974	87	75
GO:0030246	carbohydrate binding	molecular_function	0.095905	0.88863	142	17150	567	76974	87	55
GO:0003678	DNA helicase activity	molecular_function	0.67532	1	167	17150	755	76974	87	80
GO:0042592	homeostatic process	biological_process	0.84109	1	146	17150	751	76974	87	59
GO:0042278	purine nucleoside metabolic process	biological_process	0.99494	1	158	17150	852	76974	87	71
GO:0046128	purine ribonucleoside metabolic process	biological_process	0.99494	1	158	17150	852	76974	87	71
GO:0031981	nuclear lumen	cellular_component	1	1	181	17150	1151	76974	86	95
GO:0044712	single-organism catabolic process	biological_process	0.26365	1	165	17150	709	76974	85	80
GO:0005739	mitochondrion	cellular_component	0.82281	1	157	17150	774	76974	84	73
GO:0044421	extracellular region part	cellular_component	0.0034445	0.11079	160	17150	603	76974	83	77
GO:0008134	transcription factor binding	molecular_function	0.63067	1	144	17150	650	76974	83	61
GO:0098805	whole membrane	cellular_component	0.95489	1	152	17150	770	76974	83	69
GO:0006818	hydrogen transport	biological_process	0.99998	1	142	17150	858	76974	83	59
GO:0015992	proton transport	biological_process	0.99998	1	142	17150	858	76974	83	59
GO:0009579	thylakoid	cellular_component	0.3651	1	94	17150	441	76974	82	12
GO:0044436	thylakoid part	cellular_component	0.3651	1	94	17150	441	76974	82	12
GO:0008238	exopeptidase activity	molecular_function	0.071774	0.76429	138	17150	548	76974	81	57
GO:0044430	cytoskeletal part	cellular_component	0.95469	1	161	17150	802	76974	81	80
GO:0009451	RNA modification	biological_process	0.98298	1	145	17150	748	76974	81	64
GO:0016838	carbon-oxygen lyase activity, acting on phosphates	molecular_function	3.03e-08	5.68e-06	89	17150	232	76974	80	9
GO:0000152	nuclear ubiquitin ligase complex	cellular_component	2.57e-07	3.44e-05	171	17150	549	76974	80	91
GO:0005680	anaphase-promoting complex	cellular_component	2.57e-07	3.44e-05	171	17150	549	76974	80	91
GO:0031461	cullin-RING ubiquitin ligase complex	cellular_component	2.57e-07	3.44e-05	171	17150	549	76974	80	91
GO:0000151	ubiquitin ligase complex	cellular_component	1.5e-06	0.00019	172	17150	563	76974	80	92
GO:0016791	phosphatase activity	molecular_function	0.0056041	0.16633	181	17150	676	76974	80	101
GO:0015631	tubulin binding	molecular_function	0.028362	0.50764	127	17150	480	76974	80	47
GO:0009108	coenzyme biosynthetic process	biological_process	0.050955	0.66468	131	17150	513	76974	77	54
GO:0034357	photosynthetic membrane	cellular_component	0.47431	1	89	17150	429	76974	77	12
GO:0005783	endoplasmic reticulum	cellular_component	0.99816	1	126	17150	728	76974	77	49
GO:0071949	FAD binding	molecular_function	1.98e-07	2.9e-05	121	17150	355	76974	76	45
GO:0044707	single-multicellular organism process	biological_process	0.77097	1	130	17150	624	76974	76	54
GO:0009165	nucleotide biosynthetic process	biological_process	0.89893	1	125	17150	626	76974	76	49
GO:1901293	nucleoside phosphate biosynthetic process	biological_process	0.89893	1	125	17150	626	76974	76	49
GO:0032502	developmental process	biological_process	0.99654	1	135	17150	751	76974	76	59
GO:0005976	polysaccharide metabolic process	biological_process	0.76147	1	142	17150	678	76974	75	67
GO:0007010	cytoskeleton organization	biological_process	0.9904	1	130	17150	689	76974	75	55
GO:0022402	cell cycle process	biological_process	0.43643	1	148	17150	654	76974	74	74
GO:0019058	viral life cycle	biological_process	0.81452	1	131	17150	628	76974	74	57
GO:0010333	terpene synthase activity	molecular_function	4.54e-08	8.21e-06	82	17150	210	76974	73	9
GO:0052689	carboxylic ester hydrolase activity	molecular_function	0.0015906	0.063842	107	17150	372	76974	72	35
GO:0006928	movement of cell or subcellular component	biological_process	0.019124	0.39563	131	17150	496	76974	72	59
GO:0009521	photosystem	cellular_component	0.52378	1	82	17150	401	76974	72	10
GO:0072330	monocarboxylic acid biosynthetic process	biological_process	0.65483	1	98	17150	447	76974	72	26
GO:0070647	protein modification by small protein conjugation or removal	biological_process	0.11308	0.97792	149	17150	597	76974	71	78
GO:0019725	cellular homeostasis	biological_process	0.28813	1	123	17150	551	76974	71	52
GO:0031967	organelle envelope	cellular_component	0.84546	1	137	17150	676	76974	71	66
GO:0031975	envelope	cellular_component	0.91847	1	140	17150	709	76974	71	69
GO:0042623	ATPase activity, coupled	molecular_function	0.50855	1	159	17150	707	76974	70	89
GO:0005216	ion channel activity	molecular_function	0.61738	1	138	17150	631	76974	70	68
GO:0022838	substrate-specific channel activity	molecular_function	0.61738	1	138	17150	631	76974	70	68
GO:0015267	channel activity	molecular_function	0.62388	1	138	17150	632	76974	70	68
GO:0022803	passive transmembrane transporter activity	molecular_function	0.62388	1	138	17150	632	76974	70	68
GO:0005102	receptor binding	molecular_function	0.78015	1	116	17150	550	76974	69	47
GO:0032268	regulation of cellular protein metabolic process	biological_process	0.96297	1	104	17150	533	76974	69	35
GO:0044265	cellular macromolecule catabolic process	biological_process	0.9753	1	119	17150	628	76974	69	50
GO:0051246	regulation of protein metabolic process	biological_process	0.97888	1	104	17150	544	76974	69	35
GO:0044767	single-organism developmental process	biological_process	0.99579	1	125	17150	698	76974	69	56
GO:0000775	chromosome, centromeric region	cellular_component	0.51354	1	108	17150	483	76974	68	40
GO:0098687	chromosomal region	cellular_component	0.59088	1	108	17150	491	76974	68	40
GO:0016051	carbohydrate biosynthetic process	biological_process	0.99876	1	160	17150	882	76974	68	92
GO:1902600	hydrogen ion transmembrane transport	biological_process	0.99951	1	118	17150	696	76974	68	50
GO:0015291	secondary active transmembrane transporter activity	molecular_function	0.043739	0.62513	136	17150	526	76974	67	69
GO:0030170	pyridoxal phosphate binding	molecular_function	0.22223	1	98	17150	404	76974	67	31
GO:0006633	fatty acid biosynthetic process	biological_process	0.65926	1	92	17150	420	76974	67	25
GO:0008289	lipid binding	molecular_function	0.20492	1	137	17150	571	76974	66	71
GO:0009378	four-way junction helicase activity	molecular_function	0.31724	1	129	17150	543	76974	66	63
GO:0016820	hydrolase activity, acting on acid anhydrides, catalyzing transmembrane movement of substances	molecular_function	0.33726	1	147	17150	638	76974	66	81
GO:0016469	proton-transporting two-sector ATPase complex	cellular_component	0.98573	1	112	17150	611	76974	66	46
GO:0007017	microtubule-based process	biological_process	0.45494	1	108	17150	473	76974	65	43
GO:0044429	mitochondrial part	cellular_component	0.7393	1	125	17150	607	76974	65	60
GO:0042802	identical protein binding	molecular_function	0.75808	1	109	17150	510	76974	65	44
GO:0006457	protein folding	biological_process	0.83925	1	98	17150	489	76974	65	33
GO:0016071	mRNA metabolic process	biological_process	0.99659	1	118	17150	652	76974	65	53
GO:0005886	plasma membrane	cellular_component	0.99956	1	118	17150	712	76974	65	53
GO:0070008	serine-type exopeptidase activity	molecular_function	0.0068568	0.18612	112	17150	404	76974	64	48
GO:0016627	oxidoreductase activity, acting on the CH-CH group of donors	molecular_function	0.096442	0.88863	129	17150	523	76974	64	65
GO:0033013	tetrapyrrole metabolic process	biological_process	0.32299	1	118	17150	510	76974	64	54
GO:0006400	tRNA modification	biological_process	0.87562	1	119	17150	576	76974	64	55
GO:0051536	iron-sulfur cluster binding	molecular_function	0.00050381	0.02519	97	17150	324	76974	63	34
GO:0051540	metal cluster binding	molecular_function	0.00050381	0.02519	97	17150	324	76974	63	34
GO:0003724	RNA helicase activity	molecular_function	0.055253	0.68281	139	17150	540	76974	63	76
GO:0016209	antioxidant activity	molecular_function	0.097027	0.88863	105	17150	435	76974	63	42
GO:0009055	electron carrier activity	molecular_function	0.16969	1	109	17150	479	76974	63	46
GO:0008509	anion transmembrane transporter activity	molecular_function	0.32369	1	121	17150	521	76974	63	58
GO:1902580	single-organism cellular localization	biological_process	0.96748	1	126	17150	660	76974	63	63
GO:0009126	purine nucleoside monophosphate metabolic process	biological_process	0.99877	1	113	17150	655	76974	63	50
GO:0009167	purine ribonucleoside monophosphate metabolic process	biological_process	0.99877	1	113	17150	655	76974	63	50
GO:0009161	ribonucleoside monophosphate metabolic process	biological_process	0.99887	1	114	17150	662	76974	63	51
GO:0009123	nucleoside monophosphate metabolic process	biological_process	0.99906	1	114	17150	665	76974	63	51
GO:0016701	oxidoreductase activity, acting on single donors with incorporation of molecular oxygen	molecular_function	0.0099061	0.25701	119	17150	437	76974	62	57
GO:0071705	nitrogen compound transport	biological_process	0.68651	1	120	17150	571	76974	62	58
GO:0048193	Golgi vesicle transport	biological_process	0.86664	1	115	17150	558	76974	62	53
GO:0008017	microtubule binding	molecular_function	0.053383	0.67088	91	17150	344	76974	61	30
GO:0015399	primary active transmembrane transporter activity	molecular_function	0.30701	1	135	17150	576	76974	61	74
GO:0015405	P-P-bond-hydrolysis-driven transmembrane transporter activity	molecular_function	0.30701	1	135	17150	576	76974	61	74
GO:0051082	unfolded protein binding	molecular_function	0.3434	1	103	17150	446	76974	61	42
GO:0072522	purine-containing compound biosynthetic process	biological_process	0.97961	1	96	17150	523	76974	61	35
GO:0070085	glycosylation	biological_process	0.010709	0.26469	115	17150	421	76974	60	55
GO:0005740	mitochondrial envelope	cellular_component	0.63672	1	119	17150	565	76974	60	59
GO:0000988	transcription factor activity, protein binding	molecular_function	0.67476	1	113	17150	539	76974	60	53
GO:0007186	G-protein coupled receptor signaling pathway	biological_process	0.94741	1	107	17150	571	76974	59	48
GO:0006605	protein targeting	biological_process	0.95764	1	124	17150	643	76974	59	65
GO:0016875	ligase activity, forming carbon-oxygen bonds	molecular_function	0.99941	1	97	17150	560	76974	59	38
GO:0016876	ligase activity, forming aminoacyl-tRNA and related compounds	molecular_function	0.99941	1	97	17150	560	76974	59	38
GO:0034062	RNA polymerase activity	molecular_function	0.99998	1	123	17150	789	76974	59	64
GO:0004857	enzyme inhibitor activity	molecular_function	0.034405	0.56203	77	17150	300	76974	58	19
GO:0008135	translation factor activity, RNA binding	molecular_function	0.17946	1	88	17150	368	76974	58	30
GO:0031966	mitochondrial membrane	cellular_component	0.64848	1	116	17150	551	76974	58	58
GO:0044264	cellular polysaccharide metabolic process	biological_process	0.90027	1	108	17150	545	76974	58	50
GO:0033365	protein localization to organelle	biological_process	0.94055	1	130	17150	663	76974	58	72
GO:0043038	amino acid activation	biological_process	0.99965	1	97	17150	567	76974	58	39
GO:0043039	tRNA aminoacylation	biological_process	0.99965	1	97	17150	567	76974	58	39
GO:0061024	membrane organization	biological_process	0.89735	1	113	17150	568	76974	57	56
GO:0009152	purine ribonucleotide biosynthetic process	biological_process	0.95378	1	88	17150	469	76974	57	31
GO:0009260	ribonucleotide biosynthetic process	biological_process	0.9571	1	89	17150	476	76974	57	32
GO:0046390	ribose phosphate biosynthetic process	biological_process	0.9571	1	89	17150	476	76974	57	32
GO:0006164	purine nucleotide biosynthetic process	biological_process	0.97186	1	90	17150	488	76974	57	33
GO:0006073	cellular glucan metabolic process	biological_process	0.91033	1	103	17150	524	76974	56	47
GO:0044042	glucan metabolic process	biological_process	0.91033	1	103	17150	524	76974	56	47
GO:0004812	aminoacyl-tRNA ligase activity	molecular_function	0.99921	1	92	17150	531	76974	56	36
GO:0030312	external encapsulating structure	cellular_component	0.088405	0.84121	72	17150	281	76974	55	17
GO:0022414	reproductive process	biological_process	0.20588	1	127	17150	521	76974	55	72
GO:0009523	photosystem II	cellular_component	0.33591	1	62	17150	290	76974	55	7
GO:0016485	protein processing	biological_process	0.97187	1	84	17150	462	76974	55	29
GO:0051604	protein maturation	biological_process	0.97187	1	84	17150	462	76974	55	29
GO:0034637	cellular carbohydrate biosynthetic process	biological_process	0.98687	1	127	17150	676	76974	55	72
GO:0004252	serine-type endopeptidase activity	molecular_function	0.99413	1	103	17150	572	76974	55	48
GO:0006418	tRNA aminoacylation for protein translation	biological_process	0.99903	1	91	17150	523	76974	55	36
GO:0048519	negative regulation of biological process	biological_process	0.33757	1	106	17150	458	76974	54	52
GO:0044257	cellular protein catabolic process	biological_process	0.73471	1	97	17150	464	76974	54	43
GO:0051603	proteolysis involved in cellular protein catabolic process	biological_process	0.73471	1	97	17150	464	76974	54	43
GO:0030163	protein catabolic process	biological_process	0.79365	1	99	17150	482	76974	54	45
GO:0048522	positive regulation of cellular process	biological_process	0.90017	1	92	17150	467	76974	54	38
GO:0072594	establishment of protein localization to organelle	biological_process	0.94587	1	115	17150	593	76974	54	61
GO:0032259	methylation	biological_process	0.96987	1	82	17150	450	76974	54	28
GO:0048518	positive regulation of biological process	biological_process	0.9741	1	92	17150	495	76974	54	38
GO:0008194	UDP-glycosyltransferase activity	molecular_function	0.99831	1	132	17150	732	76974	54	78
GO:0009141	nucleoside triphosphate metabolic process	biological_process	0.9998	1	106	17150	646	76974	54	52
GO:0009144	purine nucleoside triphosphate metabolic process	biological_process	0.9998	1	106	17150	646	76974	54	52
GO:0009199	ribonucleoside triphosphate metabolic process	biological_process	0.9998	1	106	17150	646	76974	54	52
GO:0009205	purine ribonucleoside triphosphate metabolic process	biological_process	0.9998	1	106	17150	646	76974	54	52
GO:0015297	antiporter activity	molecular_function	0.0056672	0.16633	109	17150	383	76974	53	56
GO:0045454	cell redox homeostasis	biological_process	0.19187	1	90	17150	387	76974	53	37
GO:0019031	viral envelope	cellular_component	0.36597	1	85	17150	367	76974	53	32
GO:0036338	viral membrane	cellular_component	0.36597	1	85	17150	367	76974	53	32
GO:0006261	DNA-dependent DNA replication	biological_process	0.91725	1	88	17150	476	76974	53	35
GO:0016830	carbon-carbon lyase activity	molecular_function	0.9993	1	91	17150	550	76974	53	38
GO:0003899	DNA-directed RNA polymerase activity	molecular_function	0.99934	1	106	17150	653	76974	53	53
GO:0046034	ATP metabolic process	biological_process	0.99962	1	103	17150	620	76974	53	50
GO:0005654	nucleoplasm	cellular_component	0.99999	1	121	17150	780	76974	53	68
GO:0044451	nucleoplasm part	cellular_component	0.99999	1	121	17150	780	76974	53	68
GO:0040011	locomotion	biological_process	0.032781	0.55422	108	17150	414	76974	52	56
GO:0015698	inorganic anion transport	biological_process	0.058414	0.70337	93	17150	354	76974	52	41
GO:0044703	multi-organism reproductive process	biological_process	0.12585	1	122	17150	487	76974	52	70
GO:0016052	carbohydrate catabolic process	biological_process	0.16055	1	96	17150	392	76974	52	44
GO:0044802	single-organism membrane organization	biological_process	0.82555	1	104	17150	512	76974	52	52
GO:0043566	structure-specific DNA binding	molecular_function	0.91949	1	73	17150	371	76974	52	21
GO:0006397	mRNA processing	biological_process	0.93264	1	98	17150	498	76974	52	46
GO:0009163	nucleoside biosynthetic process	biological_process	0.9964	1	84	17150	498	76974	52	32
GO:0042455	ribonucleoside biosynthetic process	biological_process	0.9964	1	84	17150	498	76974	52	32
GO:1901659	glycosyl compound biosynthetic process	biological_process	0.99665	1	84	17150	499	76974	52	32
GO:0006813	potassium ion transport	biological_process	0.1006	0.89969	106	17150	421	76974	51	55
GO:0006270	DNA replication initiation	biological_process	0.13314	1	86	17150	347	76974	51	35
GO:0042451	purine nucleoside biosynthetic process	biological_process	0.98031	1	83	17150	459	76974	51	32
GO:0046129	purine ribonucleoside biosynthetic process	biological_process	0.98031	1	83	17150	459	76974	51	32
GO:0004190	aspartic-type endopeptidase activity	molecular_function	0.98542	1	82	17150	469	76974	51	31
GO:0070001	aspartic-type peptidase activity	molecular_function	0.98542	1	82	17150	469	76974	51	31
GO:0042626	ATPase activity, coupled to transmembrane movement of substances	molecular_function	0.13948	1	116	17150	472	76974	50	66
GO:0043492	ATPase activity, coupled to movement of substances	molecular_function	0.13948	1	116	17150	472	76974	50	66
GO:0022836	gated channel activity	molecular_function	0.49216	1	88	17150	393	76974	50	38
GO:0044459	plasma membrane part	cellular_component	0.98463	1	76	17150	437	76974	50	26
GO:0051213	dioxygenase activity	molecular_function	0.12801	1	93	17150	371	76974	49	44
GO:0000003	reproduction	biological_process	0.93839	1	85	17150	448	76974	49	36
GO:0006417	regulation of translation	biological_process	0.96746	1	72	17150	378	76974	49	23
GO:0034248	regulation of cellular amide metabolic process	biological_process	0.96746	1	72	17150	378	76974	49	23
GO:0010608	posttranscriptional regulation of gene expression	biological_process	0.97452	1	72	17150	382	76974	49	23
GO:0005618	cell wall	cellular_component	0.0061097	0.17291	58	17150	193	76974	48	10
GO:1990204	oxidoreductase complex	cellular_component	0.078623	0.78155	54	17150	221	76974	48	6
GO:0019867	outer membrane	cellular_component	0.5701	1	101	17150	461	76974	48	53
GO:0006366	transcription from RNA polymerase II promoter	biological_process	0.99975	1	94	17150	582	76974	48	46
GO:0006952	defense response	biological_process	0.044637	0.62692	110	17150	439	76974	47	63
GO:0016702	oxidoreductase activity, acting on single donors with incorporation of molecular oxygen, incorporation of two atoms of oxygen	molecular_function	0.063027	0.72365	89	17150	341	76974	47	42
GO:0000160	phosphorelay signal transduction system	biological_process	0.084631	0.82464	83	17150	321	76974	47	36
GO:0008234	cysteine-type peptidase activity	molecular_function	0.15802	1	92	17150	379	76974	47	45
GO:0016879	ligase activity, forming carbon-nitrogen bonds	molecular_function	0.29453	1	65	17150	269	76974	47	18
GO:0003712	transcription cofactor activity	molecular_function	0.47267	1	92	17150	423	76974	47	45
GO:0000989	transcription factor activity, transcription factor binding	molecular_function	0.50183	1	92	17150	426	76974	47	45
GO:0009405	pathogenesis	biological_process	0.9981	1	72	17150	456	76974	47	25
GO:0019684	photosynthesis, light reaction	biological_process	2.12e-05	0.00191	49	17150	126	76974	46	3
GO:0009892	negative regulation of metabolic process	biological_process	0.16856	1	81	17150	328	76974	46	35
GO:0048523	negative regulation of cellular process	biological_process	0.22816	1	86	17150	358	76974	46	40
GO:0006511	ubiquitin-dependent protein catabolic process	biological_process	0.6453	1	86	17150	400	76974	46	40
GO:0019941	modification-dependent protein catabolic process	biological_process	0.6656	1	86	17150	402	76974	46	40
GO:0043632	modification-dependent macromolecule catabolic process	biological_process	0.6656	1	86	17150	402	76974	46	40
GO:0046527	glucosyltransferase activity	molecular_function	0.97396	1	107	17150	563	76974	46	61
GO:0038023	signaling receptor activity	molecular_function	0.99812	1	105	17150	613	76974	46	59
GO:0004872	receptor activity	molecular_function	0.9995	1	107	17150	642	76974	46	61
GO:0044432	endoplasmic reticulum part	cellular_component	0.99989	1	71	17150	479	76974	46	25
GO:0010033	response to organic substance	biological_process	0.068749	0.74952	72	17150	278	76974	45	27
GO:0004674	protein serine/threonine kinase activity	molecular_function	0.78686	1	116	17150	543	76974	45	71
GO:0008757	S-adenosylmethionine-dependent methyltransferase activity	molecular_function	0.78959	1	70	17150	340	76974	45	25
GO:0015630	microtubule cytoskeleton	cellular_component	0.85875	1	79	17150	390	76974	45	34
GO:0043414	macromolecule methylation	biological_process	0.88132	1	70	17150	366	76974	45	25
GO:0015988	energy coupled proton transmembrane transport, against electrochemical gradient	biological_process	0.9708	1	80	17150	433	76974	45	35
GO:0015991	ATP hydrolysis coupled proton transport	biological_process	0.9708	1	80	17150	433	76974	45	35
GO:0005578	proteinaceous extracellular matrix	cellular_component	4.52e-05	0.003792	91	17150	291	76974	44	47
GO:0031012	extracellular matrix	cellular_component	0.00021405	0.013583	93	17150	310	76974	44	49
GO:0098519	nucleotide phosphatase activity, acting on free nucleotides	molecular_function	0.0062843	0.17359	87	17150	299	76974	44	43
GO:0006778	porphyrin-containing compound metabolic process	biological_process	0.073813	0.7659	89	17150	347	76974	44	45
GO:0009308	amine metabolic process	biological_process	0.086564	0.83534	82	17150	319	76974	44	38
GO:0019898	extrinsic component of membrane	cellular_component	0.4821	1	59	17150	270	76974	44	15
GO:0009311	oligosaccharide metabolic process	biological_process	0.5877	1	86	17150	389	76974	44	42
GO:0022613	ribonucleoprotein complex biogenesis	biological_process	0.74698	1	81	17150	390	76974	44	37
GO:0031982	vesicle	cellular_component	0.82	1	73	17150	352	76974	44	29
GO:0004519	endonuclease activity	molecular_function	0.90513	1	73	17150	381	76974	44	29
GO:0042175	nuclear outer membrane-endoplasmic reticulum membrane network	cellular_component	0.99993	1	67	17150	462	76974	44	23
GO:0008037	cell recognition	biological_process	0.019021	0.39523	107	17150	388	76974	43	64
GO:0042651	thylakoid membrane	cellular_component	0.044723	0.62692	47	17150	182	76974	43	4
GO:0015103	inorganic anion transmembrane transporter activity	molecular_function	0.048591	0.65009	77	17150	284	76974	43	34
GO:0006575	cellular modified amino acid metabolic process	biological_process	0.070485	0.75227	71	17150	270	76974	43	28
GO:0032446	protein modification by small protein conjugation	biological_process	0.27737	1	92	17150	382	76974	43	49
GO:0015980	energy derivation by oxidation of organic compounds	biological_process	0.54177	1	80	17150	362	76974	43	37
GO:0019439	aromatic compound catabolic process	biological_process	0.72118	1	73	17150	349	76974	43	30
GO:0031988	membrane-bounded vesicle	cellular_component	0.81834	1	72	17150	347	76974	43	29
GO:0031410	cytoplasmic vesicle	cellular_component	0.82588	1	72	17150	348	76974	43	29
GO:0005789	endoplasmic reticulum membrane	cellular_component	0.99992	1	66	17150	456	76974	43	23
GO:0042440	pigment metabolic process	biological_process	0.030412	0.53892	85	17150	317	76974	42	43
GO:0004180	carboxypeptidase activity	molecular_function	0.10097	0.89969	76	17150	298	76974	42	34
GO:0010605	negative regulation of macromolecule metabolic process	biological_process	0.25736	1	74	17150	306	76974	42	32
GO:0051258	protein polymerization	biological_process	0.4639	1	74	17150	325	76974	42	32
GO:0060589	nucleoside-triphosphatase regulator activity	molecular_function	0.49842	1	73	17150	330	76974	42	31
GO:0007275	multicellular organismal development	biological_process	0.52834	1	72	17150	332	76974	42	30
GO:0016023	cytoplasmic membrane-bounded vesicle	cellular_component	0.8243	1	71	17150	343	76974	42	29
GO:1901361	organic cyclic compound catabolic process	biological_process	0.82853	1	72	17150	359	76974	42	30
GO:0044270	cellular nitrogen compound catabolic process	biological_process	0.8393	1	71	17150	356	76974	42	29
GO:0004497	monooxygenase activity	molecular_function	0.00036148	0.01997	73	17150	225	76974	41	32
GO:0003857	3-hydroxyacyl-CoA dehydrogenase activity	molecular_function	0.00092207	0.038976	79	17150	255	76974	41	38
GO:0071554	cell wall organization or biogenesis	biological_process	0.017584	0.37196	75	17150	270	76974	41	34
GO:0009856	pollination	biological_process	0.01974	0.4013	105	17150	380	76974	41	64
GO:0009875	pollen-pistil interaction	biological_process	0.01974	0.4013	105	17150	380	76974	41	64
GO:0048544	recognition of pollen	biological_process	0.01974	0.4013	105	17150	380	76974	41	64
GO:0044706	multi-multicellular organism process	biological_process	0.031506	0.54526	105	17150	387	76974	41	64
GO:0009101	glycoprotein biosynthetic process	biological_process	0.043053	0.62513	96	17150	364	76974	41	55
GO:0009100	glycoprotein metabolic process	biological_process	0.045897	0.63404	96	17150	365	76974	41	55
GO:0018193	peptidyl-amino acid modification	biological_process	0.20401	1	70	17150	295	76974	41	29
GO:0071103	DNA conformation change	biological_process	0.23553	1	61	17150	250	76974	41	20
GO:0046700	heterocycle catabolic process	biological_process	0.79942	1	70	17150	346	76974	41	29
GO:0033176	proton-transporting V-type ATPase complex	cellular_component	0.96646	1	72	17150	388	76974	41	31
GO:0035251	UDP-glucosyltransferase activity	molecular_function	0.9898	1	98	17150	536	76974	41	57
GO:0006855	drug transmembrane transport	biological_process	0.00051496	0.02519	63	17150	189	76974	40	23
GO:0015238	drug transmembrane transporter activity	molecular_function	0.00051496	0.02519	63	17150	189	76974	40	23
GO:0015893	drug transport	biological_process	0.00051496	0.02519	63	17150	189	76974	40	23
GO:0090484	drug transporter activity	molecular_function	0.00051496	0.02519	63	17150	189	76974	40	23
GO:0042493	response to drug	biological_process	0.000705	0.031682	63	17150	191	76974	40	23
GO:1901565	organonitrogen compound catabolic process	biological_process	0.066617	0.73966	84	17150	329	76974	40	44
GO:0004185	serine-type carboxypeptidase activity	molecular_function	0.078013	0.78086	72	17150	277	76974	40	32
GO:0006486	protein glycosylation	biological_process	0.091593	0.85852	87	17150	340	76974	40	47
GO:0043413	macromolecule glycosylation	biological_process	0.091593	0.85852	87	17150	340	76974	40	47
GO:0006325	chromatin organization	biological_process	0.18276	1	84	17150	351	76974	40	44
GO:0030133	transport vesicle	cellular_component	0.3007	1	66	17150	273	76974	40	26
GO:0016836	hydro-lyase activity	molecular_function	0.34994	1	66	17150	282	76974	40	26
GO:0031329	regulation of cellular catabolic process	biological_process	0.3966	1	73	17150	315	76974	40	33
GO:0005996	monosaccharide metabolic process	biological_process	0.44853	1	75	17150	330	76974	40	35
GO:0009894	regulation of catabolic process	biological_process	0.52777	1	73	17150	326	76974	40	33
GO:0002949	tRNA threonylcarbamoyladenosine modification	biological_process	0.58093	1	83	17150	369	76974	40	43
GO:0070525	tRNA threonylcarbamoyladenosine metabolic process	biological_process	0.58093	1	83	17150	369	76974	40	43
GO:0044455	mitochondrial membrane part	cellular_component	0.58831	1	70	17150	332	76974	40	30
GO:0042254	ribosome biogenesis	biological_process	0.73512	1	75	17150	361	76974	40	35
GO:0000776	kinetochore	cellular_component	0.78848	1	67	17150	326	76974	40	27
GO:0012506	vesicle membrane	cellular_component	0.78882	1	66	17150	314	76974	40	26
GO:0044433	cytoplasmic vesicle part	cellular_component	0.79752	1	66	17150	315	76974	40	26
GO:0003690	double-stranded DNA binding	molecular_function	0.92896	1	56	17150	291	76974	40	16
GO:0048856	anatomical structure development	biological_process	0.97625	1	75	17150	412	76974	40	35
GO:0033177	proton-transporting two-sector ATPase complex, proton-transporting domain	cellular_component	0.98836	1	68	17150	393	76974	40	28
GO:0045182	translation regulator activity	molecular_function	0.98995	1	58	17150	324	76974	40	18
GO:0016567	protein ubiquitination	biological_process	0.28372	1	86	17150	357	76974	39	47
GO:0045333	cellular respiration	biological_process	0.38722	1	75	17150	327	76974	39	36
GO:0005615	extracellular space	cellular_component	0.49734	1	68	17150	303	76974	39	29
GO:0098798	mitochondrial protein complex	cellular_component	0.58296	1	69	17150	327	76974	39	30
GO:0048583	regulation of response to stimulus	biological_process	0.64844	1	50	17150	234	76974	39	11
GO:0046486	glycerolipid metabolic process	biological_process	0.69441	1	60	17150	289	76974	39	21
GO:0030120	vesicle coat	cellular_component	0.74044	1	65	17150	304	76974	39	26
GO:0030135	coated vesicle	cellular_component	0.74044	1	65	17150	304	76974	39	26
GO:0030662	coated vesicle membrane	cellular_component	0.74044	1	65	17150	304	76974	39	26
GO:0030659	cytoplasmic vesicle membrane	cellular_component	0.79555	1	65	17150	310	76974	39	26
GO:0003774	motor activity	molecular_function	0.87946	1	67	17150	331	76974	39	28
GO:0033014	tetrapyrrole biosynthetic process	biological_process	0.93851	1	70	17150	366	76974	39	31
GO:0009654	photosystem II oxygen evolving complex	cellular_component	0.049431	0.65022	40	17150	154	76974	38	2
GO:0031324	negative regulation of cellular metabolic process	biological_process	0.095983	0.88863	62	17150	237	76974	38	24
GO:0005984	disaccharide metabolic process	biological_process	0.43934	1	70	17150	303	76974	38	32
GO:0006888	ER to Golgi vesicle-mediated transport	biological_process	0.45095	1	59	17150	255	76974	38	21
GO:0042803	protein homodimerization activity	molecular_function	0.88498	1	63	17150	319	76974	38	25
GO:0090150	establishment of protein localization to membrane	biological_process	0.88955	1	73	17150	377	76974	38	35
GO:0072657	protein localization to membrane	biological_process	0.90318	1	73	17150	380	76974	38	35
GO:0015711	organic anion transport	biological_process	0.93628	1	75	17150	398	76974	38	37
GO:0009605	response to external stimulus	biological_process	0.99811	1	76	17150	482	76974	38	38
GO:0016831	carboxy-lyase activity	molecular_function	0.99963	1	66	17150	426	76974	38	28
GO:0006576	cellular biogenic amine metabolic process	biological_process	0.046795	0.63586	64	17150	237	76974	37	27
GO:0044106	cellular amine metabolic process	biological_process	0.046795	0.63586	64	17150	237	76974	37	27
GO:0048870	cell motility	biological_process	0.051752	0.66848	75	17150	281	76974	37	38
GO:0051674	localization of cell	biological_process	0.051752	0.66848	75	17150	281	76974	37	38
GO:0065009	regulation of molecular function	biological_process	0.19724	1	55	17150	224	76974	37	18
GO:0042995	cell projection	cellular_component	0.21882	1	75	17150	307	76974	37	38
GO:0015074	DNA integration	biological_process	0.39123	1	62	17150	261	76974	37	25
GO:0005743	mitochondrial inner membrane	cellular_component	0.4047	1	68	17150	308	76974	37	31
GO:0030658	transport vesicle membrane	cellular_component	0.41025	1	60	17150	255	76974	37	23
GO:0019866	organelle inner membrane	cellular_component	0.43106	1	70	17150	319	76974	37	33
GO:0004527	exonuclease activity	molecular_function	0.57603	1	72	17150	328	76974	37	35
GO:0009607	response to biotic stimulus	biological_process	0.67214	1	87	17150	442	76974	37	50
GO:0005794	Golgi apparatus	cellular_component	0.743	1	68	17150	324	76974	37	31
GO:0004540	ribonuclease activity	molecular_function	0.89731	1	67	17150	344	76974	37	30
GO:0015849	organic acid transport	biological_process	0.94485	1	74	17150	396	76974	37	37
GO:0046942	carboxylic acid transport	biological_process	0.94485	1	74	17150	396	76974	37	37
GO:0000271	polysaccharide biosynthetic process	biological_process	0.98428	1	86	17150	473	76974	37	49
GO:0033692	cellular polysaccharide biosynthetic process	biological_process	0.98446	1	85	17150	468	76974	37	48
GO:0009725	response to hormone	biological_process	0.031582	0.54526	58	17150	211	76974	36	22
GO:0009719	response to endogenous stimulus	biological_process	0.06152	0.72365	58	17150	219	76974	36	22
GO:0010506	regulation of autophagy	biological_process	0.34951	1	61	17150	258	76974	36	25
GO:0019899	enzyme binding	molecular_function	0.72825	1	57	17150	268	76974	36	21
GO:0031325	positive regulation of cellular metabolic process	biological_process	0.90684	1	66	17150	339	76974	36	30
GO:0032940	secretion by cell	biological_process	0.95819	1	63	17150	336	76974	36	27
GO:0009893	positive regulation of metabolic process	biological_process	0.96421	1	66	17150	356	76974	36	30
GO:0046903	secretion	biological_process	0.96615	1	63	17150	340	76974	36	27
GO:0016903	oxidoreductase activity, acting on the aldehyde or oxo group of donors	molecular_function	0.00015483	0.010538	84	17150	263	76974	35	49
GO:0031406	carboxylic acid binding	molecular_function	0.022686	0.43483	65	17150	229	76974	35	30
GO:0043177	organic acid binding	molecular_function	0.022686	0.43483	65	17150	229	76974	35	30
GO:0006733	oxidoreduction coenzyme metabolic process	biological_process	0.028257	0.50764	89	17150	330	76974	35	54
GO:0016645	oxidoreductase activity, acting on the CH-NH group of donors	molecular_function	0.076923	0.77351	50	17150	184	76974	35	15
GO:0016684	oxidoreductase activity, acting on peroxide as acceptor	molecular_function	0.23136	1	60	17150	254	76974	35	25
GO:0000793	condensed chromosome	cellular_component	0.56317	1	56	17150	253	76974	35	21
GO:0034061	DNA polymerase activity	molecular_function	0.62519	1	64	17150	293	76974	35	29
GO:0017038	protein import	biological_process	0.8507	1	68	17150	339	76974	35	33
GO:0009250	glucan biosynthetic process	biological_process	0.98764	1	80	17150	447	76974	35	45
GO:0051273	beta-glucan metabolic process	biological_process	0.99553	1	77	17150	448	76974	35	42
GO:0006352	DNA-templated transcription, initiation	biological_process	0.99999	1	68	17150	470	76974	35	33
GO:0043648	dicarboxylic acid metabolic process	biological_process	0.0026673	0.09635	68	17150	226	76974	34	34
GO:0016597	amino acid binding	molecular_function	0.02087	0.41352	64	17150	224	76974	34	30
GO:0042558	pteridine-containing compound metabolic process	biological_process	0.037165	0.58176	46	17150	162	76974	34	12
GO:0008171	O-methyltransferase activity	molecular_function	0.13747	1	47	17150	188	76974	34	13
GO:0042398	cellular modified amino acid biosynthetic process	biological_process	0.17835	1	56	17150	221	76974	34	22
GO:0004601	peroxidase activity	molecular_function	0.29049	1	57	17150	246	76974	34	23
GO:0012507	ER to Golgi transport vesicle membrane	cellular_component	0.46991	1	55	17150	237	76974	34	21
GO:0030127	COPII vesicle coat	cellular_component	0.46991	1	55	17150	237	76974	34	21
GO:0030134	ER to Golgi transport vesicle	cellular_component	0.46991	1	55	17150	237	76974	34	21
GO:0031683	G-protein beta/gamma-subunit complex binding	molecular_function	0.51015	1	60	17150	271	76974	34	26
GO:0051301	cell division	biological_process	0.96114	1	73	17150	391	76974	34	39
GO:0051274	beta-glucan biosynthetic process	biological_process	0.99083	1	75	17150	427	76974	34	41
GO:0009127	purine nucleoside monophosphate biosynthetic process	biological_process	0.9961	1	49	17150	310	76974	34	15
GO:0009168	purine ribonucleoside monophosphate biosynthetic process	biological_process	0.9961	1	49	17150	310	76974	34	15
GO:0009156	ribonucleoside monophosphate biosynthetic process	biological_process	0.99644	1	50	17150	317	76974	34	16
GO:0009124	nucleoside monophosphate biosynthetic process	biological_process	0.99673	1	50	17150	318	76974	34	16
GO:0051259	protein oligomerization	biological_process	0.002703	0.096671	52	17150	162	76974	33	19
GO:0045229	external encapsulating structure organization	biological_process	0.0039783	0.12372	57	17150	184	76974	33	24
GO:0071555	cell wall organization	biological_process	0.0063454	0.17426	55	17150	180	76974	33	22
GO:0010629	negative regulation of gene expression	biological_process	0.20869	1	56	17150	223	76974	33	23
GO:0005938	cell cortex	cellular_component	0.55291	1	62	17150	275	76974	33	29
GO:0065004	protein-DNA complex assembly	biological_process	0.64458	1	52	17150	247	76974	33	19
GO:0071824	protein-DNA complex subunit organization	biological_process	0.64458	1	52	17150	247	76974	33	19
GO:0008565	protein transporter activity	molecular_function	0.7261	1	58	17150	287	76974	33	25
GO:0006357	regulation of transcription from RNA polymerase II promoter	biological_process	0.94304	1	58	17150	321	76974	33	25
GO:0022610	biological adhesion	biological_process	0.98515	1	55	17150	314	76974	33	22
GO:0010207	photosystem II assembly	biological_process	1.86e-09	4.17e-07	33	17150	55	76974	32	1
GO:0031514	motile cilium	cellular_component	0.0022106	0.083049	61	17150	192	76974	32	29
GO:0005929	cilium	cellular_component	0.0030892	0.10667	61	17150	195	76974	32	29
GO:0006760	folic acid-containing compound metabolic process	biological_process	0.031422	0.54526	44	17150	151	76974	32	12
GO:0006313	transposition, DNA-mediated	biological_process	0.15547	1	55	17150	213	76974	32	23
GO:0032196	transposition	biological_process	0.15547	1	55	17150	213	76974	32	23
GO:0044448	cell cortex part	cellular_component	0.53119	1	61	17150	269	76974	32	29
GO:0031226	intrinsic component of plasma membrane	cellular_component	0.59267	1	39	17150	183	76974	32	7
GO:0006364	rRNA processing	biological_process	0.71775	1	57	17150	273	76974	32	25
GO:0016072	rRNA metabolic process	biological_process	0.71775	1	57	17150	273	76974	32	25
GO:0044431	Golgi apparatus part	cellular_component	0.75862	1	62	17150	298	76974	32	30
GO:0000226	microtubule cytoskeleton organization	biological_process	0.88796	1	56	17150	285	76974	32	24
GO:0000228	nuclear chromosome	cellular_component	0.93551	1	56	17150	300	76974	32	24
GO:0007155	cell adhesion	biological_process	0.98296	1	53	17150	302	76974	32	21
GO:0006644	phospholipid metabolic process	biological_process	0.99211	1	69	17150	401	76974	32	37
GO:0008237	metallopeptidase activity	molecular_function	1	1	71	17150	504	76974	32	39
GO:0016628	oxidoreductase activity, acting on the CH-CH group of donors, NAD or NADP as acceptor	molecular_function	0.044909	0.62765	70	17150	262	76974	31	39
GO:0005543	phospholipid binding	molecular_function	0.058124	0.70308	59	17150	216	76974	31	28
GO:0003777	microtubule motor activity	molecular_function	0.073367	0.7659	49	17150	176	76974	31	18
GO:0009066	aspartate family amino acid metabolic process	biological_process	0.075076	0.77056	60	17150	226	76974	31	29
GO:0007018	microtubule-based movement	biological_process	0.077784	0.7805	49	17150	177	76974	31	18
GO:0072509	divalent inorganic cation transmembrane transporter activity	molecular_function	0.61099	1	50	17150	233	76974	31	19
GO:0008380	RNA splicing	biological_process	0.68946	1	55	17150	262	76974	31	24
GO:0019318	hexose metabolic process	biological_process	0.76515	1	62	17150	299	76974	31	31
GO:0016709	oxidoreductase activity, acting on paired donors, with incorporation or reduction of molecular oxygen, NAD(P)H as one donor, and incorporation of one atom of oxygen	molecular_function	0.00026261	0.01608	47	17150	129	76974	30	17
GO:0004616	phosphogluconate dehydrogenase (decarboxylating) activity	molecular_function	0.0023476	0.086127	65	17150	211	76974	30	35
GO:0009890	negative regulation of biosynthetic process	biological_process	0.054126	0.67088	46	17150	163	76974	30	16
GO:0019362	pyridine nucleotide metabolic process	biological_process	0.076854	0.77351	76	17150	291	76974	30	46
GO:0046496	nicotinamide nucleotide metabolic process	biological_process	0.076854	0.77351	76	17150	291	76974	30	46
GO:0072524	pyridine-containing compound metabolic process	biological_process	0.1962	1	76	17150	309	76974	30	46
GO:0036459	ubiquitinyl hydrolase activity	molecular_function	0.28615	1	61	17150	249	76974	30	31
GO:0003743	translation initiation factor activity	molecular_function	0.38255	1	49	17150	215	76974	30	19
GO:0005819	spindle	cellular_component	0.68187	1	51	17150	238	76974	30	21
GO:0001076	transcription factor activity, RNA polymerase II transcription factor binding	molecular_function	0.75529	1	53	17150	269	76974	30	23
GO:0001104	RNA polymerase II transcription cofactor activity	molecular_function	0.75529	1	53	17150	269	76974	30	23
GO:0016592	mediator complex	cellular_component	0.77496	1	53	17150	271	76974	30	23
GO:0030243	cellulose metabolic process	biological_process	0.78471	1	65	17150	309	76974	30	35
GO:0003779	actin binding	molecular_function	0.87166	1	73	17150	365	76974	30	43
GO:0006650	glycerophospholipid metabolic process	biological_process	0.9311	1	49	17150	268	76974	30	19
GO:0070925	organelle assembly	biological_process	0.9821	1	60	17150	342	76974	30	30
GO:0048869	cellular developmental process	biological_process	0.99627	1	57	17150	345	76974	30	27
GO:0045892	negative regulation of transcription, DNA-templated	biological_process	0.037066	0.58176	40	17150	136	76974	29	11
GO:0051253	negative regulation of RNA metabolic process	biological_process	0.037066	0.58176	40	17150	136	76974	29	11
GO:1902679	negative regulation of RNA biosynthetic process	biological_process	0.037066	0.58176	40	17150	136	76974	29	11
GO:1903507	negative regulation of nucleic acid-templated transcription	biological_process	0.037066	0.58176	40	17150	136	76974	29	11
GO:0045934	negative regulation of nucleobase-containing compound metabolic process	biological_process	0.074978	0.77056	40	17150	143	76974	29	11
GO:0010558	negative regulation of macromolecule biosynthetic process	biological_process	0.090466	0.85136	44	17150	161	76974	29	15
GO:0031327	negative regulation of cellular biosynthetic process	biological_process	0.090466	0.85136	44	17150	161	76974	29	15
GO:0051172	negative regulation of nitrogen compound metabolic process	biological_process	0.090466	0.85136	44	17150	161	76974	29	15
GO:2000113	negative regulation of cellular macromolecule biosynthetic process	biological_process	0.090466	0.85136	44	17150	161	76974	29	15
GO:0033865	nucleoside bisphosphate metabolic process	biological_process	0.10008	0.89969	46	17150	170	76974	29	17
GO:0033875	ribonucleoside bisphosphate metabolic process	biological_process	0.10008	0.89969	46	17150	170	76974	29	17
GO:0034032	purine nucleoside bisphosphate metabolic process	biological_process	0.10008	0.89969	46	17150	170	76974	29	17
GO:0004803	transposase activity	molecular_function	0.22124	1	51	17150	202	76974	29	22
GO:0019205	nucleobase-containing compound kinase activity	molecular_function	0.27533	1	48	17150	198	76974	29	19
GO:0015925	galactosidase activity	molecular_function	0.29293	1	32	17150	128	76974	29	3
GO:0044724	single-organism carbohydrate catabolic process	biological_process	0.37099	1	56	17150	239	76974	29	27
GO:0005507	copper ion binding	molecular_function	0.50404	1	71	17150	318	76974	29	42
GO:0050790	regulation of catalytic activity	biological_process	0.54151	1	42	17150	193	76974	29	13
GO:0030244	cellulose biosynthetic process	biological_process	0.67176	1	63	17150	288	76974	29	34
GO:0042157	lipoprotein metabolic process	biological_process	0.96477	1	48	17150	275	76974	29	19
GO:0001871	pattern binding	molecular_function	0.97082	1	57	17150	311	76974	29	28
GO:0030247	polysaccharide binding	molecular_function	0.97082	1	57	17150	311	76974	29	28
GO:0030599	pectinesterase activity	molecular_function	0.012228	0.29148	33	17150	100	76974	28	5
GO:0042545	cell wall modification	biological_process	0.012228	0.29148	33	17150	100	76974	28	5
GO:0019201	nucleotide kinase activity	molecular_function	0.060442	0.71676	44	17150	156	76974	28	16
GO:0016646	oxidoreductase activity, acting on the CH-NH group of donors, NAD or NADP as acceptor	molecular_function	0.095805	0.88863	40	17150	146	76974	28	12
GO:0016579	protein deubiquitination	biological_process	0.12428	1	57	17150	215	76974	28	29
GO:0070646	protein modification by small protein removal	biological_process	0.12428	1	57	17150	215	76974	28	29
GO:0016568	chromatin modification	biological_process	0.22633	1	71	17150	298	76974	28	43
GO:0004177	aminopeptidase activity	molecular_function	0.31401	1	38	17150	154	76974	28	10
GO:0048285	organelle fission	biological_process	0.56031	1	53	17150	245	76974	28	25
GO:0009966	regulation of signal transduction	biological_process	0.63416	1	35	17150	163	76974	28	7
GO:0010646	regulation of cell communication	biological_process	0.66578	1	35	17150	165	76974	28	7
GO:0005991	trehalose metabolic process	biological_process	0.69458	1	40	17150	190	76974	28	12
GO:0023051	regulation of signaling	biological_process	0.69598	1	35	17150	167	76974	28	7
GO:0006979	response to oxidative stress	biological_process	0.70343	1	46	17150	235	76974	28	18
GO:0016759	cellulose synthase activity	molecular_function	0.77757	1	57	17150	270	76974	28	29
GO:0016760	cellulose synthase (UDP-forming) activity	molecular_function	0.77757	1	57	17150	270	76974	28	29
GO:0003682	chromatin binding	molecular_function	0.84098	1	39	17150	197	76974	28	11
GO:0070840	dynein complex binding	molecular_function	0.9178	1	49	17150	257	76974	28	21
GO:0009067	aspartate family amino acid biosynthetic process	biological_process	0.016487	0.35514	55	17150	189	76974	27	28
GO:0030258	lipid modification	biological_process	0.018189	0.38039	42	17150	138	76974	27	15
GO:0008374	O-acyltransferase activity	molecular_function	0.027412	0.49701	41	17150	139	76974	27	14
GO:0005244	voltage-gated ion channel activity	molecular_function	0.062964	0.72365	45	17150	161	76974	27	18
GO:0022832	voltage-gated channel activity	molecular_function	0.062964	0.72365	45	17150	161	76974	27	18
GO:0006479	protein methylation	biological_process	0.069749	0.74952	45	17150	163	76974	27	18
GO:0008213	protein alkylation	biological_process	0.069749	0.74952	45	17150	163	76974	27	18
GO:0042559	pteridine-containing compound biosynthetic process	biological_process	0.10171	0.9046	39	17150	144	76974	27	12
GO:0006865	amino acid transport	biological_process	0.42939	1	58	17150	254	76974	27	31
GO:0016866	intramolecular transferase activity	molecular_function	0.46562	1	46	17150	204	76974	27	19
GO:0004673	protein histidine kinase activity	molecular_function	0.46572	1	59	17150	257	76974	27	32
GO:0016775	phosphotransferase activity, nitrogenous group as acceptor	molecular_function	0.46572	1	59	17150	257	76974	27	32
GO:0016765	transferase activity, transferring alkyl or aryl (other than methyl) groups	molecular_function	0.65762	1	46	17150	213	76974	27	19
GO:0005887	integral component of plasma membrane	cellular_component	0.79039	1	34	17150	174	76974	27	7
GO:0006887	exocytosis	biological_process	0.85799	1	50	17150	247	76974	27	23
GO:0030684	preribosome	cellular_component	0.89058	1	48	17150	248	76974	27	21
GO:0046488	phosphatidylinositol metabolic process	biological_process	0.92122	1	43	17150	237	76974	27	16
GO:0009733	response to auxin	biological_process	9.76e-10	2.41e-07	30	17150	53	76974	26	4
GO:0004315	3-oxoacyl-[acyl-carrier-protein] synthase activity	molecular_function	0.00033357	0.018648	34	17150	86	76974	26	8
GO:0004312	fatty acid synthase activity	molecular_function	0.00043102	0.023265	34	17150	87	76974	26	8
GO:1901136	carbohydrate derivative catabolic process	biological_process	0.001538	0.063353	52	17150	160	76974	26	26
GO:0008081	phosphoric diester hydrolase activity	molecular_function	0.02196	0.42614	44	17150	146	76974	26	18
GO:0016877	ligase activity, forming carbon-sulfur bonds	molecular_function	0.11461	0.98753	42	17150	155	76974	26	16
GO:0016667	oxidoreductase activity, acting on a sulfur group of donors	molecular_function	0.20067	1	48	17150	204	76974	26	22
GO:0030674	protein binding, bridging	molecular_function	0.28648	1	52	17150	215	76974	26	26
GO:0060090	binding, bridging	molecular_function	0.28648	1	52	17150	215	76974	26	26
GO:0001775	cell activation	biological_process	0.3735	1	52	17150	222	76974	26	26
GO:0004521	endoribonuclease activity	molecular_function	0.38775	1	47	17150	203	76974	26	21
GO:0004536	deoxyribonuclease activity	molecular_function	0.45156	1	45	17150	199	76974	26	19
GO:0098800	inner mitochondrial membrane protein complex	cellular_component	0.60623	1	47	17150	228	76974	26	21
GO:0007005	mitochondrion organization	biological_process	0.63455	1	51	17150	239	76974	26	25
GO:0033178	proton-transporting two-sector ATPase complex, catalytic domain	cellular_component	0.75708	1	44	17150	218	76974	26	18
GO:0016810	hydrolase activity, acting on carbon-nitrogen (but not peptide) bonds	molecular_function	0.89215	1	50	17150	264	76974	26	24
GO:0051169	nuclear transport	biological_process	0.91454	1	53	17150	277	76974	26	27
GO:0044454	nuclear chromosome part	cellular_component	0.97303	1	47	17150	269	76974	26	21
GO:0007059	chromosome segregation	biological_process	0.97775	1	57	17150	320	76974	26	31
GO:0009653	anatomical structure morphogenesis	biological_process	0.99894	1	46	17150	304	76974	26	20
GO:0031072	heat shock protein binding	molecular_function	0.00091303	0.038976	36	17150	100	76974	25	11
GO:0052646	alditol phosphate metabolic process	biological_process	0.0015837	0.063842	45	17150	132	76974	25	20
GO:0061630	ubiquitin protein ligase activity	molecular_function	0.066626	0.73966	49	17150	177	76974	25	24
GO:0061659	ubiquitin-like protein ligase activity	molecular_function	0.066626	0.73966	49	17150	177	76974	25	24
GO:0009396	folic acid-containing compound biosynthetic process	biological_process	0.096872	0.88863	37	17150	134	76974	25	12
GO:0005577	fibrinogen complex	cellular_component	0.19138	1	49	17150	194	76974	25	24
GO:0030168	platelet activation	biological_process	0.19138	1	49	17150	194	76974	25	24
GO:0007596	blood coagulation	biological_process	0.2757	1	49	17150	201	76974	25	24
GO:0007599	hemostasis	biological_process	0.2757	1	49	17150	201	76974	25	24
GO:0050817	coagulation	biological_process	0.2757	1	49	17150	201	76974	25	24
GO:0050878	regulation of body fluid levels	biological_process	0.2757	1	49	17150	201	76974	25	24
GO:0042060	wound healing	biological_process	0.33165	1	51	17150	214	76974	25	26
GO:0009611	response to wounding	biological_process	0.37547	1	51	17150	218	76974	25	26
GO:0000280	nuclear division	biological_process	0.39059	1	49	17150	211	76974	25	24
GO:0005057	receptor signaling protein activity	molecular_function	0.41566	1	57	17150	243	76974	25	32
GO:0009064	glutamine family amino acid metabolic process	biological_process	0.53902	1	45	17150	202	76974	25	20
GO:0032040	small-subunit processome	cellular_component	0.71399	1	45	17150	214	76974	25	20
GO:0006612	protein targeting to membrane	biological_process	0.83441	1	53	17150	271	76974	25	28
GO:0070972	protein localization to endoplasmic reticulum	biological_process	0.88849	1	57	17150	299	76974	25	32
GO:0009110	vitamin biosynthetic process	biological_process	0.90373	1	40	17150	214	76974	25	15
GO:0042364	water-soluble vitamin biosynthetic process	biological_process	0.90373	1	40	17150	214	76974	25	15
GO:0006913	nucleocytoplasmic transport	biological_process	0.91831	1	52	17150	273	76974	25	27
GO:0006766	vitamin metabolic process	biological_process	0.92045	1	40	17150	217	76974	25	15
GO:0006767	water-soluble vitamin metabolic process	biological_process	0.92045	1	40	17150	217	76974	25	15
GO:0045017	glycerolipid biosynthetic process	biological_process	0.93716	1	34	17150	196	76974	25	9
GO:0003887	DNA-directed DNA polymerase activity	molecular_function	0.94626	1	48	17150	259	76974	25	23
GO:0004888	transmembrane signaling receptor activity	molecular_function	0.9995	1	53	17150	364	76974	25	28
GO:0009142	nucleoside triphosphate biosynthetic process	biological_process	0.99971	1	42	17150	301	76974	25	17
GO:0009145	purine nucleoside triphosphate biosynthetic process	biological_process	0.99971	1	42	17150	301	76974	25	17
GO:0009201	ribonucleoside triphosphate biosynthetic process	biological_process	0.99971	1	42	17150	301	76974	25	17
GO:0009206	purine ribonucleoside triphosphate biosynthetic process	biological_process	0.99971	1	42	17150	301	76974	25	17
GO:0051701	interaction with host	biological_process	0.99982	1	46	17150	340	76974	25	21
GO:0061695	transferase complex, transferring phosphorus-containing groups	cellular_component	1	1	60	17150	441	76974	25	35
GO:0070206	protein trimerization	biological_process	9.89e-05	0.007144	34	17150	83	76974	24	10
GO:0016620	oxidoreductase activity, acting on the aldehyde or oxo group of donors, NAD or NADP as acceptor	molecular_function	0.00026962	0.016233	60	17150	180	76974	24	36
GO:0046434	organophosphate catabolic process	biological_process	0.010475	0.26442	41	17150	130	76974	24	17
GO:0006553	lysine metabolic process	biological_process	0.013799	0.31732	45	17150	150	76974	24	21
GO:0008276	protein methyltransferase activity	molecular_function	0.05824	0.70308	38	17150	134	76974	24	14
GO:0004488	methylenetetrahydrofolate dehydrogenase (NADP+) activity	molecular_function	0.069738	0.74952	33	17150	115	76974	24	9
GO:0008641	small protein activating enzyme activity	molecular_function	0.13604	1	40	17150	149	76974	24	16
GO:0006547	histidine metabolic process	biological_process	0.16394	1	43	17150	168	76974	24	19
GO:0052803	imidazole-containing compound metabolic process	biological_process	0.16394	1	43	17150	168	76974	24	19
GO:0008219	cell death	biological_process	0.29624	1	43	17150	178	76974	24	19
GO:0016265	death	biological_process	0.29624	1	43	17150	178	76974	24	19
GO:0000145	exocyst	cellular_component	0.29982	1	44	17150	177	76974	24	20
GO:0000794	condensed nuclear chromosome	cellular_component	0.63477	1	34	17150	159	76974	24	10
GO:0006323	DNA packaging	biological_process	0.70966	1	32	17150	155	76974	24	8
GO:0045047	protein targeting to ER	biological_process	0.85748	1	52	17150	269	76974	24	28
GO:0072599	establishment of protein localization to endoplasmic reticulum	biological_process	0.85748	1	52	17150	269	76974	24	28
GO:0009312	oligosaccharide biosynthetic process	biological_process	0.85828	1	47	17150	241	76974	24	23
GO:0006613	cotranslational protein targeting to membrane	biological_process	0.86467	1	51	17150	265	76974	24	27
GO:0006614	SRP-dependent cotranslational protein targeting to membrane	biological_process	0.86467	1	51	17150	265	76974	24	27
GO:0006754	ATP biosynthetic process	biological_process	0.99938	1	39	17150	275	76974	24	15
GO:0006787	porphyrin-containing compound catabolic process	biological_process	0.00071513	0.031682	45	17150	131	76974	23	22
GO:0033015	tetrapyrrole catabolic process	biological_process	0.00071513	0.031682	45	17150	131	76974	23	22
GO:0051187	cofactor catabolic process	biological_process	0.00086214	0.037487	45	17150	132	76974	23	22
GO:0015994	chlorophyll metabolic process	biological_process	0.0015777	0.063842	44	17150	132	76974	23	21
GO:0050661	NADP binding	molecular_function	0.1447	1	42	17150	159	76974	23	19
GO:0006915	apoptotic process	biological_process	0.30228	1	42	17150	174	76974	23	19
GO:0012501	programmed cell death	biological_process	0.30228	1	42	17150	174	76974	23	19
GO:0016151	nickel cation binding	molecular_function	0.3057	1	34	17150	140	76974	23	11
GO:0016410	N-acyltransferase activity	molecular_function	0.33726	1	52	17150	224	76974	23	29
GO:0010256	endomembrane system organization	biological_process	0.66346	1	38	17150	180	76974	23	15
GO:0009896	positive regulation of catabolic process	biological_process	0.74551	1	43	17150	207	76974	23	20
GO:0010508	positive regulation of autophagy	biological_process	0.74551	1	43	17150	207	76974	23	20
GO:0031331	positive regulation of cellular catabolic process	biological_process	0.74551	1	43	17150	207	76974	23	20
GO:0019954	asexual reproduction	biological_process	0.8942	1	48	17150	258	76974	23	25
GO:0015276	ligand-gated ion channel activity	molecular_function	0.92797	1	42	17150	229	76974	23	19
GO:0022834	ligand-gated channel activity	molecular_function	0.92797	1	42	17150	229	76974	23	19
GO:0000902	cell morphogenesis	biological_process	0.98618	1	40	17150	239	76974	23	17
GO:0032989	cellular component morphogenesis	biological_process	0.98618	1	40	17150	239	76974	23	17
GO:0031300	intrinsic component of organelle membrane	cellular_component	0.99685	1	36	17150	245	76974	23	13
GO:0031301	integral component of organelle membrane	cellular_component	0.99685	1	36	17150	245	76974	23	13
GO:0015985	energy coupled proton transport, down electrochemical gradient	biological_process	0.99876	1	38	17150	263	76974	23	15
GO:0015986	ATP synthesis coupled proton transport	biological_process	0.99876	1	38	17150	263	76974	23	15
GO:0006072	glycerol-3-phosphate metabolic process	biological_process	0.00018768	0.012241	39	17150	101	76974	22	17
GO:0046168	glycerol-3-phosphate catabolic process	biological_process	0.00018768	0.012241	39	17150	101	76974	22	17
GO:0015996	chlorophyll catabolic process	biological_process	0.00062415	0.02931	43	17150	123	76974	22	21
GO:0047746	chlorophyllase activity	molecular_function	0.00062415	0.02931	43	17150	123	76974	22	21
GO:0046149	pigment catabolic process	biological_process	0.00088229	0.038011	43	17150	125	76974	22	21
GO:0015937	coenzyme A biosynthetic process	biological_process	0.065284	0.73168	35	17150	122	76974	22	13
GO:0033866	nucleoside bisphosphate biosynthetic process	biological_process	0.065284	0.73168	35	17150	122	76974	22	13
GO:0034030	ribonucleoside bisphosphate biosynthetic process	biological_process	0.065284	0.73168	35	17150	122	76974	22	13
GO:0034033	purine nucleoside bisphosphate biosynthetic process	biological_process	0.065284	0.73168	35	17150	122	76974	22	13
GO:0008677	2-dehydropantoate 2-reductase activity	molecular_function	0.068957	0.74952	37	17150	130	76974	22	15
GO:0010941	regulation of cell death	biological_process	0.14114	1	40	17150	152	76974	22	18
GO:0042981	regulation of apoptotic process	biological_process	0.14114	1	40	17150	152	76974	22	18
GO:0043067	regulation of programmed cell death	biological_process	0.14114	1	40	17150	152	76974	22	18
GO:0015936	coenzyme A metabolic process	biological_process	0.14662	1	35	17150	131	76974	22	13
GO:0000105	histidine biosynthetic process	biological_process	0.24296	1	40	17150	162	76974	22	18
GO:0030695	GTPase regulator activity	molecular_function	0.4424	1	46	17150	198	76974	22	24
GO:0072511	divalent inorganic cation transport	biological_process	0.68097	1	37	17150	176	76974	22	15
GO:0043093	FtsZ-dependent cytokinesis	biological_process	0.70034	1	43	17150	206	76974	22	21
GO:0032505	reproduction of a single-celled organism	biological_process	0.71342	1	43	17150	207	76974	22	21
GO:0006165	nucleoside diphosphate phosphorylation	biological_process	0.72832	1	50	17150	241	76974	22	28
GO:0009132	nucleoside diphosphate metabolic process	biological_process	0.72832	1	50	17150	241	76974	22	28
GO:0046939	nucleotide phosphorylation	biological_process	0.72832	1	50	17150	241	76974	22	28
GO:0032506	cytokinetic process	biological_process	0.77686	1	44	17150	217	76974	22	22
GO:0090529	cell septum assembly	biological_process	0.77686	1	44	17150	217	76974	22	22
GO:0034508	centromere complex assembly	biological_process	0.77802	1	40	17150	200	76974	22	18
GO:0016638	oxidoreductase activity, acting on the CH-NH2 group of donors	molecular_function	0.80807	1	50	17150	247	76974	22	28
GO:0000910	cytokinesis	biological_process	0.82745	1	44	17150	222	76974	22	22
GO:0016796	exonuclease activity, active with either ribo- or deoxyribonucleic acids and producing 5'-phosphomonoesters	molecular_function	0.88556	1	41	17150	217	76974	22	19
GO:0051128	regulation of cellular component organization	biological_process	0.96323	1	46	17150	261	76974	22	24
GO:0043207	response to external biotic stimulus	biological_process	1	1	36	17150	327	76974	22	14
GO:0051707	response to other organism	biological_process	1	1	36	17150	327	76974	22	14
GO:0051539	4 iron, 4 sulfur cluster binding	molecular_function	0.0023171	0.085677	27	17150	71	76974	21	6
GO:0006821	chloride transport	biological_process	0.0066037	0.1803	36	17150	107	76974	21	15
GO:0004127	cytidylate kinase activity	molecular_function	0.13085	1	33	17150	120	76974	21	12
GO:0006720	isoprenoid metabolic process	biological_process	0.1522	1	42	17150	161	76974	21	21
GO:0016407	acetyltransferase activity	molecular_function	0.22853	1	52	17150	218	76974	21	31
GO:0006413	translational initiation	biological_process	0.47675	1	32	17150	144	76974	21	11
GO:1903825	organic acid transmembrane transport	biological_process	0.4865	1	51	17150	226	76974	21	30
GO:0098656	anion transmembrane transport	biological_process	0.50113	1	51	17150	227	76974	21	30
GO:0003333	amino acid transmembrane transport	biological_process	0.50262	1	50	17150	222	76974	21	29
GO:0006090	pyruvate metabolic process	biological_process	0.57839	1	48	17150	218	76974	21	27
GO:0006814	sodium ion transport	biological_process	0.58666	1	39	17150	188	76974	21	18
GO:0006096	glycolytic process	biological_process	0.60098	1	47	17150	215	76974	21	26
GO:0006757	ATP generation from ADP	biological_process	0.60098	1	47	17150	215	76974	21	26
GO:0009135	purine nucleoside diphosphate metabolic process	biological_process	0.60098	1	47	17150	215	76974	21	26
GO:0009179	purine ribonucleoside diphosphate metabolic process	biological_process	0.60098	1	47	17150	215	76974	21	26
GO:0009185	ribonucleoside diphosphate metabolic process	biological_process	0.60098	1	47	17150	215	76974	21	26
GO:0046031	ADP metabolic process	biological_process	0.60098	1	47	17150	215	76974	21	26
GO:0016893	endonuclease activity, active with either ribo- or deoxyribonucleic acids and producing 5'-phosphomonoesters	molecular_function	0.69704	1	43	17150	206	76974	21	22
GO:0098813	nuclear chromosome segregation	biological_process	0.73874	1	45	17150	218	76974	21	24
GO:0005815	microtubule organizing center	cellular_component	0.76546	1	43	17150	207	76974	21	22
GO:0000375	RNA splicing, via transesterification reactions	biological_process	0.79612	1	39	17150	197	76974	21	18
GO:0008408	3'-5' exonuclease activity	molecular_function	0.79715	1	38	17150	189	76974	21	17
GO:0005741	mitochondrial outer membrane	cellular_component	0.83325	1	47	17150	240	76974	21	26
GO:0031968	organelle outer membrane	cellular_component	0.83325	1	47	17150	240	76974	21	26
GO:0045259	proton-transporting ATP synthase complex	cellular_component	0.85354	1	32	17150	175	76974	21	11
GO:0015931	nucleobase-containing compound transport	biological_process	0.91467	1	35	17150	199	76974	21	14
GO:0033179	proton-transporting V-type ATPase, V0 domain	cellular_component	0.97683	1	37	17150	216	76974	21	16
GO:1903509	liposaccharide metabolic process	biological_process	0.98942	1	31	17150	203	76974	21	10
GO:0016762	xyloglucan:xyloglucosyl transferase activity	molecular_function	0.0034408	0.11079	21	17150	56	76974	20	1
GO:0048046	apoplast	cellular_component	0.0034408	0.11079	21	17150	56	76974	20	1
GO:0009085	lysine biosynthetic process	biological_process	0.0055194	0.16509	40	17150	125	76974	20	20
GO:0009089	lysine biosynthetic process via diaminopimelate	biological_process	0.0055194	0.16509	40	17150	125	76974	20	20
GO:0046451	diaminopimelate metabolic process	biological_process	0.0055194	0.16509	40	17150	125	76974	20	20
GO:0005247	voltage-gated chloride channel activity	molecular_function	0.0061877	0.17291	34	17150	99	76974	20	14
GO:0005253	anion channel activity	molecular_function	0.0061877	0.17291	34	17150	99	76974	20	14
GO:0005254	chloride channel activity	molecular_function	0.0061877	0.17291	34	17150	99	76974	20	14
GO:0008308	voltage-gated anion channel activity	molecular_function	0.0061877	0.17291	34	17150	99	76974	20	14
GO:0015108	chloride transmembrane transporter activity	molecular_function	0.0061877	0.17291	34	17150	99	76974	20	14
GO:0030259	lipid glycosylation	biological_process	0.0062226	0.17291	28	17150	79	76974	20	8
GO:0006414	translational elongation	biological_process	0.023716	0.45089	28	17150	91	76974	20	8
GO:0003916	DNA topoisomerase activity	molecular_function	0.044329	0.62513	35	17150	118	76974	20	15
GO:0009522	photosystem I	cellular_component	0.15753	1	23	17150	91	76974	20	3
GO:0008080	N-acetyltransferase activity	molecular_function	0.22078	1	48	17150	198	76974	20	28
GO:0000413	protein peptidyl-prolyl isomerization	biological_process	0.54674	1	27	17150	130	76974	20	7
GO:0003755	peptidyl-prolyl cis-trans isomerase activity	molecular_function	0.54674	1	27	17150	130	76974	20	7
GO:0016859	cis-trans isomerase activity	molecular_function	0.54674	1	27	17150	130	76974	20	7
GO:0018208	peptidyl-proline modification	biological_process	0.54674	1	27	17150	130	76974	20	7
GO:0000502	proteasome complex	cellular_component	0.55635	1	34	17150	162	76974	20	14
GO:0055065	metal ion homeostasis	biological_process	0.56062	1	36	17150	172	76974	20	16
GO:0050801	ion homeostasis	biological_process	0.57244	1	36	17150	173	76974	20	16
GO:0055080	cation homeostasis	biological_process	0.57244	1	36	17150	173	76974	20	16
GO:0098771	inorganic ion homeostasis	biological_process	0.57244	1	36	17150	173	76974	20	16
GO:0044282	small molecule catabolic process	biological_process	0.58288	1	36	17150	163	76974	20	16
GO:0060590	ATPase regulator activity	molecular_function	0.60307	1	27	17150	132	76974	20	7
GO:0048878	chemical homeostasis	biological_process	0.65108	1	36	17150	178	76974	20	16
GO:0019208	phosphatase regulator activity	molecular_function	0.66727	1	26	17150	122	76974	20	6
GO:0033180	proton-transporting V-type ATPase, V1 domain	cellular_component	0.72672	1	35	17150	172	76974	20	15
GO:0051382	kinetochore assembly	biological_process	0.74429	1	38	17150	186	76974	20	18
GO:0051383	kinetochore organization	biological_process	0.74429	1	38	17150	186	76974	20	18
GO:0015081	sodium ion transmembrane transporter activity	molecular_function	0.7756	1	34	17150	179	76974	20	14
GO:0008514	organic anion transmembrane transporter activity	molecular_function	0.81773	1	45	17150	230	76974	20	25
GO:0005342	organic acid transmembrane transporter activity	molecular_function	0.82784	1	40	17150	208	76974	20	20
GO:0046943	carboxylic acid transmembrane transporter activity	molecular_function	0.82784	1	40	17150	208	76974	20	20
GO:0019079	viral genome replication	biological_process	0.84607	1	45	17150	224	76974	20	25
GO:0000777	condensed chromosome kinetochore	cellular_component	0.87201	1	30	17150	159	76974	20	10
GO:0000779	condensed chromosome, centromeric region	cellular_component	0.87201	1	30	17150	159	76974	20	10
GO:0006606	protein import into nucleus	biological_process	0.8924	1	42	17150	219	76974	20	22
GO:0034504	protein localization to nucleus	biological_process	0.8924	1	42	17150	219	76974	20	22
GO:0044744	protein targeting to nucleus	biological_process	0.8924	1	42	17150	219	76974	20	22
GO:0051170	nuclear import	biological_process	0.8924	1	42	17150	219	76974	20	22
GO:1902593	single-organism nuclear import	biological_process	0.8924	1	42	17150	219	76974	20	22
GO:0006403	RNA localization	biological_process	0.89392	1	34	17150	191	76974	20	14
GO:0050657	nucleic acid transport	biological_process	0.89392	1	34	17150	191	76974	20	14
GO:0050658	RNA transport	biological_process	0.89392	1	34	17150	191	76974	20	14
GO:0051236	establishment of RNA localization	biological_process	0.89392	1	34	17150	191	76974	20	14
GO:0008170	N-methyltransferase activity	molecular_function	0.97352	1	37	17150	229	76974	20	17
GO:0006643	membrane lipid metabolic process	biological_process	0.97416	1	33	17150	204	76974	20	13
GO:0005261	cation channel activity	molecular_function	0.99578	1	35	17150	234	76974	20	15
GO:0070566	adenylyltransferase activity	molecular_function	0.00017294	0.011602	40	17150	103	76974	19	21
GO:0019080	viral gene expression	biological_process	0.07872	0.78155	33	17150	115	76974	19	14
GO:1901681	sulfur compound binding	molecular_function	0.096778	0.88863	49	17150	183	76974	19	30
GO:0044033	multi-organism metabolic process	biological_process	0.11367	0.98124	34	17150	123	76974	19	15
GO:0008299	isoprenoid biosynthetic process	biological_process	0.12282	1	40	17150	149	76974	19	21
GO:0043900	regulation of multi-organism process	biological_process	0.13137	1	26	17150	95	76974	19	7
GO:0015035	protein disulfide oxidoreductase activity	molecular_function	0.2032	1	32	17150	134	76974	19	13
GO:0015036	disulfide oxidoreductase activity	molecular_function	0.2032	1	32	17150	134	76974	19	13
GO:0016569	covalent chromatin modification	biological_process	0.37981	1	44	17150	189	76974	19	25
GO:0016570	histone modification	biological_process	0.37981	1	44	17150	189	76974	19	25
GO:0008047	enzyme activator activity	molecular_function	0.38932	1	40	17150	168	76974	19	21
GO:0016651	oxidoreductase activity, acting on NAD(P)H	molecular_function	0.49082	1	32	17150	147	76974	19	13
GO:0015171	amino acid transmembrane transporter activity	molecular_function	0.53361	1	38	17150	172	76974	19	19
GO:0051726	regulation of cell cycle	biological_process	0.57162	1	42	17150	196	76974	19	23
GO:0000155	phosphorelay sensor kinase activity	molecular_function	0.60828	1	49	17150	221	76974	19	30
GO:0046148	pigment biosynthetic process	biological_process	0.64909	1	40	17150	186	76974	19	21
GO:0006779	porphyrin-containing compound biosynthetic process	biological_process	0.83057	1	41	17150	206	76974	19	22
GO:0000940	condensed chromosome outer kinetochore	cellular_component	0.84197	1	29	17150	151	76974	19	10
GO:0022900	electron transport chain	biological_process	0.9508	1	31	17150	183	76974	19	12
GO:0002376	immune system process	biological_process	0.98493	1	37	17150	223	76974	19	18
GO:0006664	glycolipid metabolic process	biological_process	0.99542	1	27	17150	190	76974	19	8
GO:0009247	glycolipid biosynthetic process	biological_process	0.99542	1	27	17150	190	76974	19	8
GO:0046467	membrane lipid biosynthetic process	biological_process	0.99542	1	27	17150	190	76974	19	8
GO:0008173	RNA methyltransferase activity	molecular_function	0.99686	1	29	17150	197	76974	19	10
GO:0004222	metalloendopeptidase activity	molecular_function	1	1	41	17150	327	76974	19	22
GO:0018205	peptidyl-lysine modification	biological_process	0.003586	0.11456	39	17150	114	76974	18	21
GO:0003746	translation elongation factor activity	molecular_function	0.035507	0.57103	26	17150	86	76974	18	8
GO:0019842	vitamin binding	molecular_function	0.087965	0.84121	45	17150	164	76974	18	27
GO:0009072	aromatic amino acid family metabolic process	biological_process	0.32318	1	39	17150	161	76974	18	21
GO:0031399	regulation of protein modification process	biological_process	0.35269	1	27	17150	114	76974	18	9
GO:0005839	proteasome core complex	cellular_component	0.54103	1	27	17150	129	76974	18	9
GO:0042168	heme metabolic process	biological_process	0.58168	1	39	17150	177	76974	18	21
GO:0004197	cysteine-type endopeptidase activity	molecular_function	0.58883	1	36	17150	168	76974	18	18
GO:0006873	cellular ion homeostasis	biological_process	0.65695	1	33	17150	164	76974	18	15
GO:0006875	cellular metal ion homeostasis	biological_process	0.65695	1	33	17150	164	76974	18	15
GO:0030003	cellular cation homeostasis	biological_process	0.65695	1	33	17150	164	76974	18	15
GO:0055082	cellular chemical homeostasis	biological_process	0.65695	1	33	17150	164	76974	18	15
GO:0009341	beta-galactosidase complex	cellular_component	0.67331	1	20	17150	94	76974	18	2
GO:0004565	beta-galactosidase activity	molecular_function	0.7708	1	20	17150	100	76974	18	2
GO:0046351	disaccharide biosynthetic process	biological_process	0.77595	1	31	17150	155	76974	18	13
GO:0010876	lipid localization	biological_process	0.8215	1	41	17150	210	76974	18	23
GO:0016790	thiolester hydrolase activity	molecular_function	0.91453	1	24	17150	135	76974	18	6
GO:0008654	phospholipid biosynthetic process	biological_process	0.99959	1	43	17150	300	76974	18	25
GO:0015629	actin cytoskeleton	cellular_component	0.9996	1	33	17150	235	76974	18	15
GO:0043631	RNA polyadenylation	biological_process	0.0001486	0.010262	35	17150	86	76974	17	18
GO:0015948	methanogenesis	biological_process	0.037806	0.584	38	17150	129	76974	17	21
GO:0015975	energy derivation by oxidation of reduced inorganic compounds	biological_process	0.037806	0.584	38	17150	129	76974	17	21
GO:0043447	alkane biosynthetic process	biological_process	0.037806	0.584	38	17150	129	76974	17	21
GO:0009061	anaerobic respiration	biological_process	0.041326	0.62513	38	17150	130	76974	17	21
GO:0015947	methane metabolic process	biological_process	0.042322	0.62513	38	17150	130	76974	17	21
GO:0043446	cellular alkane metabolic process	biological_process	0.042322	0.62513	38	17150	130	76974	17	21
GO:0006265	DNA topological change	biological_process	0.043633	0.62513	29	17150	95	76974	17	12
GO:0017119	Golgi transport complex	cellular_component	0.075152	0.77056	30	17150	103	76974	17	13
GO:0005882	intermediate filament	cellular_component	0.086807	0.83534	45	17150	164	76974	17	28
GO:0045111	intermediate filament cytoskeleton	cellular_component	0.086807	0.83534	45	17150	164	76974	17	28
GO:0006790	sulfur compound metabolic process	biological_process	0.1485	1	45	17150	172	76974	17	28
GO:0051321	meiotic cell cycle	biological_process	0.17817	1	25	17150	93	76974	17	8
GO:0016278	lysine N-methyltransferase activity	molecular_function	0.19945	1	30	17150	115	76974	17	13
GO:0016279	protein-lysine N-methyltransferase activity	molecular_function	0.19945	1	30	17150	115	76974	17	13
GO:0018024	histone-lysine N-methyltransferase activity	molecular_function	0.19945	1	30	17150	115	76974	17	13
GO:0042054	histone methyltransferase activity	molecular_function	0.19945	1	30	17150	115	76974	17	13
GO:0000272	polysaccharide catabolic process	biological_process	0.25208	1	34	17150	137	76974	17	17
GO:0016868	intramolecular transferase activity, phosphotransferases	molecular_function	0.38052	1	27	17150	114	76974	17	10
GO:0007166	cell surface receptor signaling pathway	biological_process	0.40931	1	25	17150	111	76974	17	8
GO:0006783	heme biosynthetic process	biological_process	0.60286	1	37	17150	169	76974	17	20
GO:0019888	protein phosphatase regulator activity	molecular_function	0.64174	1	23	17150	107	76974	17	6
GO:0005773	vacuole	cellular_component	0.81368	1	31	17150	160	76974	17	14
GO:0070838	divalent metal ion transport	biological_process	0.89735	1	29	17150	157	76974	17	12
GO:0098797	plasma membrane protein complex	cellular_component	0.99887	1	35	17150	254	76974	17	18
GO:0034655	nucleobase-containing compound catabolic process	biological_process	0.99975	1	24	17150	190	76974	17	7
GO:0000428	DNA-directed RNA polymerase complex	cellular_component	1	1	37	17150	341	76974	17	20
GO:0030880	RNA polymerase complex	cellular_component	1	1	37	17150	341	76974	17	20
GO:0055029	nuclear DNA-directed RNA polymerase complex	cellular_component	1	1	37	17150	341	76974	17	20
GO:0005544	calcium-dependent phospholipid binding	molecular_function	0.0036369	0.1154	21	17150	54	76974	16	5
GO:0004506	squalene monooxygenase activity	molecular_function	0.0037884	0.1194	22	17150	56	76974	16	6
GO:0070009	serine-type aminopeptidase activity	molecular_function	0.010287	0.26255	24	17150	67	76974	16	8
GO:0008239	dipeptidyl-peptidase activity	molecular_function	0.021749	0.42379	24	17150	71	76974	16	8
GO:0016679	oxidoreductase activity, acting on diphenols and related substances as donors	molecular_function	0.025639	0.47295	35	17150	119	76974	16	19
GO:0003993	acid phosphatase activity	molecular_function	0.076739	0.77351	31	17150	106	76974	16	15
GO:0016042	lipid catabolic process	biological_process	0.10042	0.89969	29	17150	102	76974	16	13
GO:0019013	viral nucleocapsid	cellular_component	0.15338	1	25	17150	92	76974	16	9
GO:0016891	endoribonuclease activity, producing 5'-phosphomonoesters	molecular_function	0.40643	1	35	17150	150	76974	16	19
GO:0051087	chaperone binding	molecular_function	0.4153	1	23	17150	99	76974	16	7
GO:0019354	siroheme biosynthetic process	biological_process	0.421	1	33	17150	141	76974	16	17
GO:0043115	precorrin-2 dehydrogenase activity	molecular_function	0.421	1	33	17150	141	76974	16	17
GO:0046156	siroheme metabolic process	biological_process	0.421	1	33	17150	141	76974	16	17
GO:0019069	viral capsid assembly	biological_process	0.46666	1	23	17150	99	76974	16	7
GO:0016763	transferase activity, transferring pentosyl groups	molecular_function	0.47058	1	32	17150	139	76974	16	16
GO:0006066	alcohol metabolic process	biological_process	0.53087	1	29	17150	131	76974	16	13
GO:0019901	protein kinase binding	molecular_function	0.54361	1	23	17150	104	76974	16	7
GO:0000785	chromatin	cellular_component	0.58827	1	25	17150	118	76974	16	9
GO:0000746	conjugation	biological_process	0.59378	1	23	17150	106	76974	16	7
GO:0019900	kinase binding	molecular_function	0.60659	1	23	17150	107	76974	16	7
GO:0072527	pyrimidine-containing compound metabolic process	biological_process	0.60867	1	25	17150	118	76974	16	9
GO:0005262	calcium channel activity	molecular_function	0.61012	1	28	17150	133	76974	16	12
GO:0030029	actin filament-based process	biological_process	0.64483	1	23	17150	109	76974	16	7
GO:0030036	actin cytoskeleton organization	biological_process	0.64483	1	23	17150	109	76974	16	7
GO:0015085	calcium ion transmembrane transporter activity	molecular_function	0.64621	1	28	17150	135	76974	16	12
GO:0019068	virion assembly	biological_process	0.77741	1	23	17150	116	76974	16	7
GO:0033043	regulation of organelle organization	biological_process	0.7982	1	34	17150	172	76974	16	18
GO:0006006	glucose metabolic process	biological_process	0.81589	1	33	17150	165	76974	16	17
GO:0006869	lipid transport	biological_process	0.82318	1	38	17150	196	76974	16	22
GO:1901615	organic hydroxy compound metabolic process	biological_process	0.8286	1	31	17150	160	76974	16	15
GO:0045263	proton-transporting ATP synthase complex, coupling factor F(o)	cellular_component	0.84041	1	26	17150	144	76974	16	10
GO:0000221	vacuolar proton-transporting V-type ATPase, V1 domain	cellular_component	0.84195	1	29	17150	153	76974	16	13
GO:0016471	vacuolar proton-transporting V-type ATPase complex	cellular_component	0.84195	1	29	17150	153	76974	16	13
GO:0005774	vacuolar membrane	cellular_component	0.85197	1	29	17150	154	76974	16	13
GO:0044437	vacuolar part	cellular_component	0.85197	1	29	17150	154	76974	16	13
GO:0000049	tRNA binding	molecular_function	0.87078	1	27	17150	144	76974	16	11
GO:0001510	RNA methylation	biological_process	0.92363	1	22	17150	126	76974	16	6
GO:0022411	cellular component disassembly	biological_process	0.94597	1	24	17150	142	76974	16	8
GO:0032984	macromolecular complex disassembly	biological_process	0.94597	1	24	17150	142	76974	16	8
GO:0015079	potassium ion transmembrane transporter activity	molecular_function	0.98943	1	33	17150	204	76974	16	17
GO:0046474	glycerophospholipid biosynthetic process	biological_process	0.99813	1	23	17150	175	76974	16	7
GO:0004652	polynucleotide adenylyltransferase activity	molecular_function	1.04e-05	0.001061	29	17150	59	76974	15	14
GO:0044272	sulfur compound biosynthetic process	biological_process	0.142	1	36	17150	134	76974	15	21
GO:0006541	glutamine metabolic process	biological_process	0.58082	1	22	17150	100	76974	15	7
GO:0000278	mitotic cell cycle	biological_process	0.76655	1	33	17150	164	76974	15	18
GO:1903047	mitotic cell cycle process	biological_process	0.76655	1	33	17150	164	76974	15	18
GO:0071804	cellular potassium ion transport	biological_process	0.77283	1	31	17150	152	76974	15	16
GO:0071805	potassium ion transmembrane transport	biological_process	0.77283	1	31	17150	152	76974	15	16
GO:0043624	cellular protein complex disassembly	biological_process	0.88418	1	20	17150	113	76974	15	5
GO:0000377	RNA splicing, via transesterification reactions with bulged adenosine as nucleophile	biological_process	0.88943	1	29	17150	160	76974	15	14
GO:0000398	mRNA splicing, via spliceosome	biological_process	0.88943	1	29	17150	160	76974	15	14
GO:0005992	trehalose biosynthetic process	biological_process	0.88965	1	26	17150	142	76974	15	11
GO:0006955	immune response	biological_process	0.91843	1	25	17150	141	76974	15	10
GO:0043241	protein complex disassembly	biological_process	0.94235	1	22	17150	131	76974	15	7
GO:0000778	condensed nuclear chromosome kinetochore	cellular_component	0.95603	1	20	17150	122	76974	15	5
GO:0000780	condensed nuclear chromosome, centromeric region	cellular_component	0.95603	1	20	17150	122	76974	15	5
GO:0000942	condensed nuclear chromosome outer kinetochore	cellular_component	0.95603	1	20	17150	122	76974	15	5
GO:0042729	DASH complex	cellular_component	0.95603	1	20	17150	122	76974	15	5
GO:0006367	transcription initiation from RNA polymerase II promoter	biological_process	0.99881	1	34	17150	232	76974	15	19
GO:0016591	DNA-directed RNA polymerase II, holoenzyme	cellular_component	1	1	34	17150	282	76974	15	19
GO:0004144	diacylglycerol O-acyltransferase activity	molecular_function	0.0019975	0.076263	16	17150	35	76974	14	2
GO:0016411	acylglycerol O-acyltransferase activity	molecular_function	0.0019975	0.076263	16	17150	35	76974	14	2
GO:0008839	4-hydroxy-tetrahydrodipicolinate reductase	molecular_function	0.0025411	0.092502	32	17150	92	76974	14	18
GO:0004499	N,N-dimethylaniline monooxygenase activity	molecular_function	0.012814	0.2979	25	17150	72	76974	14	11
GO:0016571	histone methylation	biological_process	0.014157	0.31809	26	17150	75	76974	14	12
GO:0018022	peptidyl-lysine methylation	biological_process	0.014157	0.31809	26	17150	75	76974	14	12
GO:0034968	histone lysine methylation	biological_process	0.014157	0.31809	26	17150	75	76974	14	12
GO:0019083	viral transcription	biological_process	0.034683	0.56203	27	17150	85	76974	14	13
GO:0016160	amylase activity	molecular_function	0.051958	0.66848	31	17150	103	76974	14	17
GO:0008855	exodeoxyribonuclease VII activity	molecular_function	0.30662	1	28	17150	115	76974	14	14
GO:0003995	acyl-CoA dehydrogenase activity	molecular_function	0.31122	1	22	17150	86	76974	14	8
GO:0008272	sulfate transport	biological_process	0.38378	1	20	17150	82	76974	14	6
GO:0015116	sulfate transmembrane transporter activity	molecular_function	0.38378	1	20	17150	82	76974	14	6
GO:1901682	sulfur compound transmembrane transporter activity	molecular_function	0.38378	1	20	17150	82	76974	14	6
GO:0004529	exodeoxyribonuclease activity	molecular_function	0.39376	1	28	17150	120	76974	14	14
GO:0016895	exodeoxyribonuclease activity, producing 5'-phosphomonoesters	molecular_function	0.39376	1	28	17150	120	76974	14	14
GO:0072348	sulfur compound transport	biological_process	0.40122	1	20	17150	83	76974	14	6
GO:0016832	aldehyde-lyase activity	molecular_function	0.46821	1	21	17150	93	76974	14	7
GO:0015095	magnesium ion transmembrane transporter activity	molecular_function	0.47637	1	19	17150	81	76974	14	5
GO:0015693	magnesium ion transport	biological_process	0.47637	1	19	17150	81	76974	14	5
GO:0019220	regulation of phosphate metabolic process	biological_process	0.4974	1	15	17150	67	76974	14	1
GO:0051174	regulation of phosphorus metabolic process	biological_process	0.4974	1	15	17150	67	76974	14	1
GO:0051130	positive regulation of cellular component organization	biological_process	0.58534	1	18	17150	87	76974	14	4
GO:0042393	histone binding	molecular_function	0.5916	1	26	17150	117	76974	14	12
GO:0016311	dephosphorylation	biological_process	0.59475	1	38	17150	174	76974	14	24
GO:0009084	glutamine family amino acid biosynthetic process	biological_process	0.6086	1	26	17150	120	76974	14	12
GO:0016054	organic acid catabolic process	biological_process	0.73462	1	30	17150	145	76974	14	16
GO:0046395	carboxylic acid catabolic process	biological_process	0.73462	1	30	17150	145	76974	14	16
GO:0009452	7-methylguanosine RNA capping	biological_process	0.74987	1	19	17150	94	76974	14	5
GO:0036260	RNA capping	biological_process	0.74987	1	19	17150	94	76974	14	5
GO:0015923	mannosidase activity	molecular_function	0.82274	1	26	17150	131	76974	14	12
GO:0010109	regulation of photosynthesis	biological_process	0.0031947	0.10672	14	17150	31	76974	13	1
GO:0042548	regulation of photosynthesis, light reaction	biological_process	0.0031947	0.10672	14	17150	31	76974	13	1
GO:0042549	photosystem II stabilization	biological_process	0.0031947	0.10672	14	17150	31	76974	13	1
GO:0043467	regulation of generation of precursor metabolites and energy	biological_process	0.0031947	0.10672	14	17150	31	76974	13	1
GO:0004140	dephospho-CoA kinase activity	molecular_function	0.026328	0.48108	23	17150	70	76974	13	10
GO:0008121	ubiquinol-cytochrome-c reductase activity	molecular_function	0.042884	0.62513	20	17150	64	76974	13	7
GO:0016681	oxidoreductase activity, acting on diphenols and related substances as donors, cytochrome as acceptor	molecular_function	0.042884	0.62513	20	17150	64	76974	13	7
GO:0006721	terpenoid metabolic process	biological_process	0.043771	0.62513	31	17150	102	76974	13	18
GO:0016114	terpenoid biosynthetic process	biological_process	0.043771	0.62513	31	17150	102	76974	13	18
GO:0043903	regulation of symbiosis, encompassing mutualism through parasitism	biological_process	0.051649	0.66848	16	17150	47	76974	13	3
GO:0009073	aromatic amino acid family biosynthetic process	biological_process	0.088492	0.84121	31	17150	109	76974	13	18
GO:0004576	oligosaccharyl transferase activity	molecular_function	0.13751	1	19	17150	67	76974	13	6
GO:0004555	alpha,alpha-trehalase activity	molecular_function	0.1909	1	14	17150	48	76974	13	1
GO:0015927	trehalase activity	molecular_function	0.1909	1	14	17150	48	76974	13	1
GO:0005096	GTPase activator activity	molecular_function	0.24549	1	34	17150	133	76974	13	21
GO:0051338	regulation of transferase activity	biological_process	0.3307	1	22	17150	91	76974	13	9
GO:0000774	adenyl-nucleotide exchange factor activity	molecular_function	0.35959	1	18	17150	74	76974	13	5
GO:0004356	glutamate-ammonia ligase activity	molecular_function	0.39357	1	14	17150	57	76974	13	1
GO:0016211	ammonia ligase activity	molecular_function	0.4221	1	14	17150	58	76974	13	1
GO:0016880	acid-ammonia (or amide) ligase activity	molecular_function	0.4221	1	14	17150	58	76974	13	1
GO:0004427	inorganic diphosphatase activity	molecular_function	0.45454	1	28	17150	120	76974	13	15
GO:0009615	response to virus	biological_process	0.50608	1	21	17150	93	76974	13	8
GO:0005801	cis-Golgi network	cellular_component	0.51816	1	18	17150	79	76974	13	5
GO:0098799	outer mitochondrial membrane protein complex	cellular_component	0.52863	1	22	17150	99	76974	13	9
GO:0006099	tricarboxylic acid cycle	biological_process	0.53763	1	18	17150	79	76974	13	5
GO:0006101	citrate metabolic process	biological_process	0.53763	1	18	17150	79	76974	13	5
GO:0015298	solute:cation antiporter activity	molecular_function	0.53783	1	41	17150	180	76974	13	28
GO:0015299	solute:proton antiporter activity	molecular_function	0.53783	1	41	17150	180	76974	13	28
GO:0006470	protein dephosphorylation	biological_process	0.56443	1	36	17150	163	76974	13	23
GO:0072350	tricarboxylic acid metabolic process	biological_process	0.64999	1	18	17150	84	76974	13	5
GO:0007067	mitotic nuclear division	biological_process	0.6521	1	30	17150	142	76974	13	17
GO:0009060	aerobic respiration	biological_process	0.736	1	19	17150	93	76974	13	6
GO:0006298	mismatch repair	biological_process	0.74203	1	22	17150	107	76974	13	9
GO:0006415	translational termination	biological_process	0.78857	1	16	17150	85	76974	13	3
GO:0006383	transcription from RNA polymerase III promoter	biological_process	0.81	1	22	17150	121	76974	13	9
GO:0005681	spliceosomal complex	cellular_component	0.82805	1	22	17150	118	76974	13	9
GO:0000990	transcription factor activity, core RNA polymerase binding	molecular_function	0.85978	1	21	17150	113	76974	13	8
GO:0000996	core DNA-dependent RNA polymerase binding promoter specificity activity	molecular_function	0.85978	1	21	17150	113	76974	13	8
GO:0016987	sigma factor activity	molecular_function	0.85978	1	21	17150	113	76974	13	8
GO:0015932	nucleobase-containing compound transmembrane transporter activity	molecular_function	0.88251	1	23	17150	135	76974	13	10
GO:0009236	cobalamin biosynthetic process	biological_process	0.88686	1	18	17150	102	76974	13	5
GO:0009235	cobalamin metabolic process	biological_process	0.91292	1	18	17150	105	76974	13	5
GO:0006874	cellular calcium ion homeostasis	biological_process	0.94115	1	22	17150	136	76974	13	9
GO:0055074	calcium ion homeostasis	biological_process	0.94115	1	22	17150	136	76974	13	9
GO:0072503	cellular divalent inorganic cation homeostasis	biological_process	0.94115	1	22	17150	136	76974	13	9
GO:0072507	divalent inorganic cation homeostasis	biological_process	0.94115	1	22	17150	136	76974	13	9
GO:0010604	positive regulation of macromolecule metabolic process	biological_process	0.94706	1	23	17150	137	76974	13	10
GO:0008175	tRNA methyltransferase activity	molecular_function	0.96434	1	19	17150	119	76974	13	6
GO:0006402	mRNA catabolic process	biological_process	0.9928	1	20	17150	139	76974	13	7
GO:0006401	RNA catabolic process	biological_process	0.99432	1	20	17150	141	76974	13	7
GO:0006497	protein lipidation	biological_process	0.99889	1	17	17150	145	76974	13	4
GO:0006505	GPI anchor metabolic process	biological_process	0.99889	1	17	17150	145	76974	13	4
GO:0006506	GPI anchor biosynthetic process	biological_process	0.99889	1	17	17150	145	76974	13	4
GO:0006661	phosphatidylinositol biosynthetic process	biological_process	0.99889	1	17	17150	145	76974	13	4
GO:0042158	lipoprotein biosynthetic process	biological_process	0.99926	1	17	17150	148	76974	13	4
GO:0005667	transcription factor complex	cellular_component	0.99998	1	30	17150	248	76974	13	17
GO:0051537	2 iron, 2 sulfur cluster binding	molecular_function	0.041735	0.62513	19	17150	58	76974	12	7
GO:0008378	galactosyltransferase activity	molecular_function	0.043256	0.62513	27	17150	87	76974	12	15
GO:0043248	proteasome assembly	biological_process	0.05071	0.66332	26	17150	85	76974	12	14
GO:0000075	cell cycle checkpoint	biological_process	0.057367	0.69973	27	17150	91	76974	12	15
GO:0016161	beta-amylase activity	molecular_function	0.05932	0.71245	25	17150	81	76974	12	13
GO:0046685	response to arsenic-containing substance	biological_process	0.066371	0.73966	15	17150	45	76974	12	3
GO:0050792	regulation of viral process	biological_process	0.068626	0.74952	15	17150	45	76974	12	3
GO:0016861	intramolecular oxidoreductase activity, interconverting aldoses and ketoses	molecular_function	0.087735	0.84082	24	17150	84	76974	12	12
GO:0016860	intramolecular oxidoreductase activity	molecular_function	0.097824	0.89112	28	17150	102	76974	12	16
GO:0007127	meiosis I	biological_process	0.10373	0.91723	19	17150	64	76974	12	7
GO:0007126	meiotic nuclear division	biological_process	0.18313	1	19	17150	69	76974	12	7
GO:1903046	meiotic cell cycle process	biological_process	0.18313	1	19	17150	69	76974	12	7
GO:0006334	nucleosome assembly	biological_process	0.25365	1	13	17150	50	76974	12	1
GO:0031497	chromatin assembly	biological_process	0.25365	1	13	17150	50	76974	12	1
GO:0034728	nucleosome organization	biological_process	0.25365	1	13	17150	50	76974	12	1
GO:0043086	negative regulation of catalytic activity	biological_process	0.32531	1	23	17150	96	76974	12	11
GO:0044092	negative regulation of molecular function	biological_process	0.32531	1	23	17150	96	76974	12	11
GO:0006333	chromatin assembly or disassembly	biological_process	0.32721	1	13	17150	53	76974	12	1
GO:0019751	polyol metabolic process	biological_process	0.42288	1	25	17150	105	76974	12	13
GO:0043161	proteasome-mediated ubiquitin-dependent protein catabolic process	biological_process	0.52226	1	28	17150	124	76974	12	16
GO:0003697	single-stranded DNA binding	molecular_function	0.5345	1	17	17150	75	76974	12	5
GO:0007030	Golgi organization	biological_process	0.54271	1	23	17150	102	76974	12	11
GO:0070469	respiratory chain	cellular_component	0.55248	1	18	17150	88	76974	12	6
GO:0010498	proteasomal protein catabolic process	biological_process	0.56134	1	28	17150	126	76974	12	16
GO:0004520	endodeoxyribonuclease activity	molecular_function	0.59922	1	17	17150	79	76974	12	5
GO:0017016	Ras GTPase binding	molecular_function	0.6285	1	22	17150	100	76974	12	10
GO:0031267	small GTPase binding	molecular_function	0.6285	1	22	17150	100	76974	12	10
GO:0051020	GTPase binding	molecular_function	0.6285	1	22	17150	100	76974	12	10
GO:0051336	regulation of hydrolase activity	biological_process	0.65062	1	16	17150	78	76974	12	4
GO:0051028	mRNA transport	biological_process	0.67303	1	22	17150	105	76974	12	10
GO:0004970	ionotropic glutamate receptor activity	molecular_function	0.679	1	23	17150	109	76974	12	11
GO:0008066	glutamate receptor activity	molecular_function	0.679	1	23	17150	109	76974	12	11
GO:0005230	extracellular ligand-gated ion channel activity	molecular_function	0.7032	1	24	17150	115	76974	12	12
GO:0016854	racemase and epimerase activity	molecular_function	0.72592	1	19	17150	94	76974	12	7
GO:0016655	oxidoreductase activity, acting on NAD(P)H, quinone or similar compound as acceptor	molecular_function	0.77439	1	17	17150	93	76974	12	5
GO:0030983	mismatched DNA binding	molecular_function	0.79252	1	19	17150	96	76974	12	7
GO:0032324	molybdopterin cofactor biosynthetic process	biological_process	0.79478	1	22	17150	111	76974	12	10
GO:0043545	molybdopterin cofactor metabolic process	biological_process	0.79478	1	22	17150	111	76974	12	10
GO:0051189	prosthetic group metabolic process	biological_process	0.79478	1	22	17150	111	76974	12	10
GO:0004298	threonine-type endopeptidase activity	molecular_function	0.79886	1	18	17150	101	76974	12	6
GO:0070003	threonine-type peptidase activity	molecular_function	0.79886	1	18	17150	101	76974	12	6
GO:0005777	peroxisome	cellular_component	0.80513	1	21	17150	114	76974	12	9
GO:0042579	microbody	cellular_component	0.80513	1	21	17150	114	76974	12	9
GO:0009891	positive regulation of biosynthetic process	biological_process	0.81769	1	21	17150	112	76974	12	9
GO:0010557	positive regulation of macromolecule biosynthetic process	biological_process	0.81769	1	21	17150	112	76974	12	9
GO:0031328	positive regulation of cellular biosynthetic process	biological_process	0.81769	1	21	17150	112	76974	12	9
GO:0051173	positive regulation of nitrogen compound metabolic process	biological_process	0.81769	1	21	17150	112	76974	12	9
GO:0016886	ligase activity, forming phosphoric ester bonds	molecular_function	0.84476	1	20	17150	106	76974	12	8
GO:0072528	pyrimidine-containing compound biosynthetic process	biological_process	0.85925	1	17	17150	96	76974	12	5
GO:0022884	macromolecule transmembrane transporter activity	molecular_function	0.86437	1	18	17150	111	76974	12	6
GO:0010628	positive regulation of gene expression	biological_process	0.87615	1	21	17150	117	76974	12	9
GO:0008608	attachment of spindle microtubules to kinetochore	biological_process	0.91673	1	17	17150	100	76974	12	5
GO:0034453	microtubule anchoring	biological_process	0.94759	1	17	17150	105	76974	12	5
GO:0000139	Golgi membrane	cellular_component	0.9868	1	27	17150	170	76974	12	15
GO:0006304	DNA modification	biological_process	0.99962	1	17	17150	160	76974	12	5
GO:0004930	G-protein coupled receptor activity	molecular_function	0.9998	1	22	17150	201	76974	12	10
GO:0090575	RNA polymerase II transcription factor complex	cellular_component	0.99994	1	28	17150	225	76974	12	16
GO:0044798	nuclear transcription factor complex	cellular_component	0.99998	1	28	17150	238	76974	12	16
GO:0004557	alpha-galactosidase activity	molecular_function	0.01381	0.31732	12	17150	28	76974	11	1
GO:0007131	reciprocal meiotic recombination	biological_process	0.034575	0.56203	15	17150	42	76974	11	4
GO:0035825	reciprocal DNA recombination	biological_process	0.034575	0.56203	15	17150	42	76974	11	4
GO:0006359	regulation of transcription from RNA polymerase III promoter	biological_process	0.037371	0.58304	19	17150	59	76974	11	8
GO:0006284	base-excision repair	biological_process	0.042583	0.62513	17	17150	51	76974	11	6
GO:0004764	shikimate 3-dehydrogenase (NADP+) activity	molecular_function	0.044113	0.62513	21	17150	64	76974	11	10
GO:0009628	response to abiotic stimulus	biological_process	0.048389	0.64924	28	17150	93	76974	11	17
GO:0019207	kinase regulator activity	molecular_function	0.04927	0.65022	25	17150	83	76974	11	14
GO:0016624	oxidoreductase activity, acting on the aldehyde or oxo group of donors, disulfide as acceptor	molecular_function	0.060266	0.71648	23	17150	74	76974	11	12
GO:0046782	regulation of viral transcription	biological_process	0.074208	0.7659	13	17150	38	76974	11	2
GO:1903900	regulation of viral life cycle	biological_process	0.074208	0.7659	13	17150	38	76974	11	2
GO:0030976	thiamine pyrophosphate binding	molecular_function	0.21048	1	34	17150	130	76974	11	23
GO:0005985	sucrose metabolic process	biological_process	0.22737	1	31	17150	118	76974	11	20
GO:0016776	phosphotransferase activity, phosphate group as acceptor	molecular_function	0.23074	1	17	17150	66	76974	11	6
GO:0007006	mitochondrial membrane organization	biological_process	0.23353	1	21	17150	79	76974	11	10
GO:0016725	oxidoreductase activity, acting on CH or CH2 groups	molecular_function	0.26405	1	16	17150	60	76974	11	5
GO:0046806	viral scaffold	cellular_component	0.32461	1	14	17150	54	76974	11	3
GO:0043015	gamma-tubulin binding	molecular_function	0.34046	1	22	17150	87	76974	11	11
GO:0003684	damaged DNA binding	molecular_function	0.3471	1	20	17150	80	76974	11	9
GO:0000922	spindle pole	cellular_component	0.36545	1	22	17150	88	76974	11	11
GO:0080134	regulation of response to stress	biological_process	0.38215	1	15	17150	62	76974	11	4
GO:0016881	acid-amino acid ligase activity	molecular_function	0.39904	1	23	17150	94	76974	11	12
GO:0019783	ubiquitin-like protein-specific protease activity	molecular_function	0.43956	1	23	17150	98	76974	11	12
GO:0005742	mitochondrial outer membrane translocase complex	cellular_component	0.45067	1	20	17150	86	76974	11	9
GO:0006777	Mo-molybdopterin cofactor biosynthetic process	biological_process	0.51238	1	20	17150	87	76974	11	9
GO:0019720	Mo-molybdopterin cofactor metabolic process	biological_process	0.51238	1	20	17150	87	76974	11	9
GO:0006289	nucleotide-excision repair	biological_process	0.74361	1	19	17150	94	76974	11	8
GO:0007015	actin filament organization	biological_process	0.81421	1	15	17150	81	76974	11	4
GO:0030030	cell projection organization	biological_process	0.84669	1	19	17150	107	76974	11	8
GO:0005179	hormone activity	molecular_function	0.85518	1	18	17150	97	76974	11	7
GO:0005753	mitochondrial proton-transporting ATP synthase complex	cellular_component	0.85883	1	20	17150	114	76974	11	9
GO:0009063	cellular amino acid catabolic process	biological_process	0.86908	1	21	17150	113	76974	11	10
GO:0015002	heme-copper terminal oxidase activity	molecular_function	0.87174	1	19	17150	110	76974	11	8
GO:0009678	hydrogen-translocating pyrophosphatase activity	molecular_function	0.88729	1	18	17150	98	76974	11	7
GO:0044702	single organism reproductive process	biological_process	0.89114	1	17	17150	98	76974	11	6
GO:0005217	intracellular ligand-gated ion channel activity	molecular_function	0.9151	1	18	17150	108	76974	11	7
GO:0005218	intracellular ligand-gated calcium channel activity	molecular_function	0.9151	1	18	17150	108	76974	11	7
GO:0005219	ryanodine-sensitive calcium-release channel activity	molecular_function	0.9151	1	18	17150	108	76974	11	7
GO:0015278	calcium-release channel activity	molecular_function	0.9151	1	18	17150	108	76974	11	7
GO:0061025	membrane fusion	biological_process	0.92119	1	25	17150	141	76974	11	14
GO:0008287	protein serine/threonine phosphatase complex	cellular_component	0.92662	1	15	17150	89	76974	11	4
GO:1903293	phosphatase complex	cellular_component	0.92662	1	15	17150	89	76974	11	4
GO:0016423	tRNA (guanine) methyltransferase activity	molecular_function	0.92752	1	16	17150	95	76974	11	5
GO:1901606	alpha-amino acid catabolic process	biological_process	0.92879	1	18	17150	105	76974	11	7
GO:0019953	sexual reproduction	biological_process	0.95383	1	17	17150	107	76974	11	6
GO:0005635	nuclear envelope	cellular_component	0.95821	1	19	17150	114	76974	11	8
GO:0005643	nuclear pore	cellular_component	0.96297	1	16	17150	99	76974	11	5
GO:0022406	membrane docking	biological_process	0.99525	1	20	17150	142	76974	11	9
GO:0006835	dicarboxylic acid transport	biological_process	0.99529	1	16	17150	126	76974	11	5
GO:0046556	alpha-L-arabinofuranosidase activity	molecular_function	0.019863	0.40205	13	17150	33	76974	10	3
GO:0016307	phosphatidylinositol phosphate kinase activity	molecular_function	0.032216	0.55416	21	17150	62	76974	10	11
GO:0009538	photosystem I reaction center	cellular_component	0.043508	0.62513	12	17150	38	76974	10	2
GO:0009271	phage shock	biological_process	0.070449	0.75227	10	17150	28	76974	10	0
GO:0098586	cellular response to virus	biological_process	0.070449	0.75227	10	17150	28	76974	10	0
GO:0003855	3-dehydroquinate dehydratase activity	molecular_function	0.10014	0.89969	20	17150	66	76974	10	10
GO:0016703	oxidoreductase activity, acting on single donors with incorporation of molecular oxygen, incorporation of one atom of oxygen (internal monooxygenases or internal mixed function oxidases)	molecular_function	0.10229	0.90631	25	17150	88	76974	10	15
GO:0016298	lipase activity	molecular_function	0.12444	1	19	17150	65	76974	10	9
GO:0006536	glutamate metabolic process	biological_process	0.14026	1	23	17150	83	76974	10	13
GO:0030151	molybdenum ion binding	molecular_function	0.27012	1	16	17150	60	76974	10	6
GO:0016840	carbon-nitrogen lyase activity	molecular_function	0.28761	1	14	17150	54	76974	10	4
GO:0019773	proteasome core complex, alpha-subunit complex	cellular_component	0.32547	1	16	17150	67	76974	10	6
GO:0004089	carbonate dehydratase activity	molecular_function	0.32834	1	14	17150	57	76974	10	4
GO:0016272	prefoldin complex	cellular_component	0.33055	1	18	17150	74	76974	10	8
GO:0009314	response to radiation	biological_process	0.35931	1	18	17150	71	76974	10	8
GO:0044815	DNA packaging complex	cellular_component	0.41451	1	11	17150	46	76974	10	1
GO:0000041	transition metal ion transport	biological_process	0.55474	1	24	17150	115	76974	10	14
GO:0035821	modification of morphology or physiology of other organism	biological_process	0.69991	1	20	17150	99	76974	10	10
GO:0071806	protein transmembrane transport	biological_process	0.70493	1	18	17150	91	76974	10	8
GO:0044087	regulation of cellular component biogenesis	biological_process	0.73839	1	17	17150	86	76974	10	7
GO:0003747	translation release factor activity	molecular_function	0.76783	1	13	17150	67	76974	10	3
GO:0008079	translation termination factor activity	molecular_function	0.76783	1	13	17150	67	76974	10	3
GO:0004559	alpha-mannosidase activity	molecular_function	0.76969	1	21	17150	103	76974	10	11
GO:0004129	cytochrome-c oxidase activity	molecular_function	0.81364	1	18	17150	100	76974	10	8
GO:0016675	oxidoreductase activity, acting on a heme group of donors	molecular_function	0.81364	1	18	17150	100	76974	10	8
GO:0016676	oxidoreductase activity, acting on a heme group of donors, oxygen as acceptor	molecular_function	0.81364	1	18	17150	100	76974	10	8
GO:0003954	NADH dehydrogenase activity	molecular_function	0.81572	1	14	17150	80	76974	10	4
GO:1902531	regulation of intracellular signal transduction	biological_process	0.83137	1	14	17150	76	76974	10	4
GO:0016782	transferase activity, transferring sulfur-containing groups	molecular_function	0.8343	1	17	17150	95	76974	10	7
GO:0072686	mitotic spindle	cellular_component	0.85879	1	14	17150	79	76974	10	4
GO:0051493	regulation of cytoskeleton organization	biological_process	0.86053	1	16	17150	90	76974	10	6
GO:0000723	telomere maintenance	biological_process	0.90451	1	14	17150	80	76974	10	4
GO:0032200	telomere organization	biological_process	0.90451	1	14	17150	80	76974	10	4
GO:0060249	anatomical structure homeostasis	biological_process	0.90451	1	14	17150	80	76974	10	4
GO:0008375	acetylglucosaminyltransferase activity	molecular_function	0.90675	1	28	17150	151	76974	10	18
GO:0030154	cell differentiation	biological_process	0.9342	1	24	17150	144	76974	10	14
GO:0008643	carbohydrate transport	biological_process	0.95601	1	29	17150	177	76974	10	19
GO:0048278	vesicle docking	biological_process	0.98166	1	19	17150	122	76974	10	9
GO:0005852	eukaryotic translation initiation factor 3 complex	cellular_component	0.98347	1	15	17150	105	76974	10	5
GO:0030176	integral component of endoplasmic reticulum membrane	cellular_component	0.99981	1	13	17150	131	76974	10	3
GO:0031227	intrinsic component of endoplasmic reticulum membrane	cellular_component	0.99981	1	13	17150	131	76974	10	3
GO:0019321	pentose metabolic process	biological_process	0.016837	0.35776	12	17150	29	76974	9	3
GO:0019566	arabinose metabolic process	biological_process	0.016837	0.35776	12	17150	29	76974	9	3
GO:0046373	L-arabinose metabolic process	biological_process	0.016837	0.35776	12	17150	29	76974	9	3
GO:0004618	phosphoglycerate kinase activity	molecular_function	0.020332	0.40803	12	17150	30	76974	9	3
GO:0005516	calmodulin binding	molecular_function	0.024565	0.46478	42	17150	138	76974	9	33
GO:0016774	phosphotransferase activity, carboxyl group as acceptor	molecular_function	0.034708	0.56203	12	17150	32	76974	9	3
GO:0007172	signal complex assembly	biological_process	0.098745	0.89617	9	17150	25	76974	9	0
GO:0016717	oxidoreductase activity, acting on paired donors, with oxidation of a pair of donors resulting in the reduction of molecular oxygen to two molecules of water	molecular_function	0.10891	0.95242	14	17150	45	76974	9	5
GO:0005912	adherens junction	cellular_component	0.1451	1	9	17150	27	76974	9	0
GO:0005924	cell-substrate adherens junction	cellular_component	0.1451	1	9	17150	27	76974	9	0
GO:0005925	focal adhesion	cellular_component	0.1451	1	9	17150	27	76974	9	0
GO:0030055	cell-substrate junction	cellular_component	0.1451	1	9	17150	27	76974	9	0
GO:0070161	anchoring junction	cellular_component	0.1451	1	9	17150	27	76974	9	0
GO:0006537	glutamate biosynthetic process	biological_process	0.15991	1	21	17150	76	76974	9	12
GO:0043650	dicarboxylic acid biosynthetic process	biological_process	0.15991	1	21	17150	76	76974	9	12
GO:0015930	glutamate synthase activity	molecular_function	0.17672	1	21	17150	77	76974	9	12
GO:0006188	IMP biosynthetic process	biological_process	0.18013	1	9	17150	30	76974	9	0
GO:0046040	IMP metabolic process	biological_process	0.18013	1	9	17150	30	76974	9	0
GO:0004713	protein tyrosine kinase activity	molecular_function	0.24071	1	10	17150	34	76974	9	1
GO:0006338	chromatin remodeling	biological_process	0.2436	1	28	17150	114	76974	9	19
GO:0044769	ATPase activity, coupled to transmembrane movement of ions, rotational mechanism	molecular_function	0.28933	1	13	17150	51	76974	9	4
GO:0030054	cell junction	cellular_component	0.34672	1	9	17150	34	76974	9	0
GO:0016892	endoribonuclease activity, producing 3'-phosphomonoesters	molecular_function	0.37842	1	11	17150	45	76974	9	2
GO:0016894	endonuclease activity, active with either ribo- or deoxyribonucleic acids and producing 3'-phosphomonoesters	molecular_function	0.37842	1	11	17150	45	76974	9	2
GO:0043549	regulation of kinase activity	biological_process	0.38499	1	10	17150	41	76974	9	1
GO:0045859	regulation of protein kinase activity	biological_process	0.38499	1	10	17150	41	76974	9	1
GO:0009416	response to light stimulus	biological_process	0.4162	1	17	17150	69	76974	9	8
GO:0010638	positive regulation of organelle organization	biological_process	0.42663	1	13	17150	54	76974	9	4
GO:0032269	negative regulation of cellular protein metabolic process	biological_process	0.42753	1	22	17150	94	76974	9	13
GO:0051248	negative regulation of protein metabolic process	biological_process	0.42753	1	22	17150	94	76974	9	13
GO:0019829	cation-transporting ATPase activity	molecular_function	0.45676	1	13	17150	57	76974	9	4
GO:0042625	ATPase activity, coupled to transmembrane movement of ions	molecular_function	0.45676	1	13	17150	57	76974	9	4
GO:0033218	amide binding	molecular_function	0.47315	1	19	17150	85	76974	9	10
GO:0046915	transition metal ion transmembrane transporter activity	molecular_function	0.51408	1	23	17150	107	76974	9	14
GO:0001932	regulation of protein phosphorylation	biological_process	0.51729	1	10	17150	45	76974	9	1
GO:0070069	cytochrome complex	cellular_component	0.52269	1	13	17150	62	76974	9	4
GO:0048731	system development	biological_process	0.52407	1	19	17150	88	76974	9	10
GO:0006839	mitochondrial transport	biological_process	0.5307	1	20	17150	91	76974	9	11
GO:0000786	nucleosome	cellular_component	0.53693	1	9	17150	41	76974	9	0
GO:0032993	protein-DNA complex	cellular_component	0.53693	1	9	17150	41	76974	9	0
GO:0004594	pantothenate kinase activity	molecular_function	0.56829	1	12	17150	53	76974	9	3
GO:1901068	guanosine-containing compound metabolic process	biological_process	0.59901	1	15	17150	70	76974	9	6
GO:0042325	regulation of phosphorylation	biological_process	0.61301	1	10	17150	48	76974	9	1
GO:0010181	FMN binding	molecular_function	0.64391	1	21	17150	101	76974	9	12
GO:0004721	phosphoprotein phosphatase activity	molecular_function	0.668	1	34	17150	160	76974	9	25
GO:0016811	hydrolase activity, acting on carbon-nitrogen (but not peptide) bonds, in linear amides	molecular_function	0.67946	1	19	17150	94	76974	9	10
GO:0008483	transaminase activity	molecular_function	0.68098	1	13	17150	63	76974	9	4
GO:0016769	transferase activity, transferring nitrogenous groups	molecular_function	0.68098	1	13	17150	63	76974	9	4
GO:0065002	intracellular protein transmembrane transport	biological_process	0.70203	1	17	17150	86	76974	9	8
GO:0044743	intracellular protein transmembrane import	biological_process	0.7214	1	16	17150	82	76974	9	7
GO:0005874	microtubule	cellular_component	0.72808	1	15	17150	75	76974	9	6
GO:0005876	spindle microtubule	cellular_component	0.72808	1	15	17150	75	76974	9	6
GO:0005746	mitochondrial respiratory chain	cellular_component	0.72951	1	13	17150	72	76974	9	4
GO:0045893	positive regulation of transcription, DNA-templated	biological_process	0.76961	1	17	17150	87	76974	9	8
GO:1903508	positive regulation of nucleic acid-templated transcription	biological_process	0.76961	1	17	17150	87	76974	9	8
GO:0005092	GDP-dissociation inhibitor activity	molecular_function	0.79604	1	12	17150	64	76974	9	3
GO:0045935	positive regulation of nucleobase-containing compound metabolic process	biological_process	0.80103	1	18	17150	94	76974	9	9
GO:0051254	positive regulation of RNA metabolic process	biological_process	0.80103	1	18	17150	94	76974	9	9
GO:1902680	positive regulation of RNA biosynthetic process	biological_process	0.80103	1	18	17150	94	76974	9	9
GO:0008064	regulation of actin polymerization or depolymerization	biological_process	0.8117	1	12	17150	66	76974	9	3
GO:0008154	actin polymerization or depolymerization	biological_process	0.8117	1	12	17150	66	76974	9	3
GO:0030041	actin filament polymerization	biological_process	0.8117	1	12	17150	66	76974	9	3
GO:0030832	regulation of actin filament length	biological_process	0.8117	1	12	17150	66	76974	9	3
GO:0030833	regulation of actin filament polymerization	biological_process	0.8117	1	12	17150	66	76974	9	3
GO:0032271	regulation of protein polymerization	biological_process	0.8117	1	12	17150	66	76974	9	3
GO:0032535	regulation of cellular component size	biological_process	0.8117	1	12	17150	66	76974	9	3
GO:0032956	regulation of actin cytoskeleton organization	biological_process	0.8117	1	12	17150	66	76974	9	3
GO:0032970	regulation of actin filament-based process	biological_process	0.8117	1	12	17150	66	76974	9	3
GO:0043254	regulation of protein complex assembly	biological_process	0.8117	1	12	17150	66	76974	9	3
GO:0008176	tRNA (guanine-N7-)-methyltransferase activity	molecular_function	0.83325	1	12	17150	66	76974	9	3
GO:0008137	NADH dehydrogenase (ubiquinone) activity	molecular_function	0.83475	1	13	17150	76	76974	9	4
GO:0050136	NADH dehydrogenase (quinone) activity	molecular_function	0.83475	1	13	17150	76	76974	9	4
GO:0008948	oxaloacetate decarboxylase activity	molecular_function	0.83908	1	17	17150	101	76974	9	8
GO:0035725	sodium ion transmembrane transport	biological_process	0.83908	1	17	17150	101	76974	9	8
GO:0071436	sodium ion export	biological_process	0.83908	1	17	17150	101	76974	9	8
GO:0044003	modification by symbiont of host morphology or physiology	biological_process	0.84565	1	17	17150	94	76974	9	8
GO:0051817	modification of morphology or physiology of other organism involved in symbiotic interaction	biological_process	0.84565	1	17	17150	94	76974	9	8
GO:0090066	regulation of anatomical structure size	biological_process	0.88319	1	12	17150	71	76974	9	3
GO:0008443	phosphofructokinase activity	molecular_function	0.88514	1	23	17150	126	76974	9	14
GO:0019200	carbohydrate kinase activity	molecular_function	0.90806	1	23	17150	129	76974	9	14
GO:0009306	protein secretion	biological_process	0.95802	1	13	17150	89	76974	9	4
GO:0006904	vesicle docking involved in exocytosis	biological_process	0.97609	1	17	17150	109	76974	9	8
GO:0000956	nuclear-transcribed mRNA catabolic process	biological_process	0.97954	1	14	17150	97	76974	9	5
GO:0070887	cellular response to chemical stimulus	biological_process	0.98008	1	13	17150	98	76974	9	4
GO:0008026	ATP-dependent helicase activity	molecular_function	0.9908	1	19	17150	130	76974	9	10
GO:0070035	purine NTP-dependent helicase activity	molecular_function	0.9908	1	19	17150	130	76974	9	10
GO:0018995	host	cellular_component	0.99326	1	21	17150	150	76974	9	12
GO:0033643	host cell part	cellular_component	0.99326	1	21	17150	150	76974	9	12
GO:0043657	host cell	cellular_component	0.99326	1	21	17150	150	76974	9	12
GO:0044215	other organism	cellular_component	0.99326	1	21	17150	150	76974	9	12
GO:0044216	other organism cell	cellular_component	0.99326	1	21	17150	150	76974	9	12
GO:0044217	other organism part	cellular_component	0.99326	1	21	17150	150	76974	9	12
GO:0004611	phosphoenolpyruvate carboxykinase activity	molecular_function	0.99484	1	18	17150	128	76974	9	9
GO:0015740	C4-dicarboxylate transport	biological_process	0.99642	1	14	17150	116	76974	9	5
GO:0008094	DNA-dependent ATPase activity	molecular_function	0.99821	1	16	17150	127	76974	9	7
GO:0051090	regulation of sequence-specific DNA binding transcription factor activity	biological_process	0.0070441	0.19011	13	17150	29	76974	8	5
GO:0000077	DNA damage checkpoint	biological_process	0.010095	0.25905	15	17150	37	76974	8	7
GO:0031570	DNA integrity checkpoint	biological_process	0.010095	0.25905	15	17150	37	76974	8	7
GO:0004619	phosphoglycerate mutase activity	molecular_function	0.010632	0.26469	13	17150	32	76974	8	5
GO:0009584	detection of visible light	biological_process	0.019975	0.40259	16	17150	42	76974	8	8
GO:0018298	protein-chromophore linkage	biological_process	0.025196	0.46952	16	17150	43	76974	8	8
GO:0009581	detection of external stimulus	biological_process	0.031374	0.54526	16	17150	44	76974	8	8
GO:0009582	detection of abiotic stimulus	biological_process	0.031374	0.54526	16	17150	44	76974	8	8
GO:0009583	detection of light stimulus	biological_process	0.031374	0.54526	16	17150	44	76974	8	8
GO:0051606	detection of stimulus	biological_process	0.038596	0.59424	16	17150	45	76974	8	8
GO:0006282	regulation of DNA repair	biological_process	0.044312	0.62513	9	17150	22	76974	8	1
GO:0080135	regulation of cellular response to stress	biological_process	0.044312	0.62513	9	17150	22	76974	8	1
GO:2001020	regulation of response to DNA damage stimulus	biological_process	0.044312	0.62513	9	17150	22	76974	8	1
GO:0008312	7S RNA binding	molecular_function	0.061496	0.72365	17	17150	55	76974	8	9
GO:0048500	signal recognition particle	cellular_component	0.061496	0.72365	17	17150	55	76974	8	9
GO:0006083	acetate metabolic process	biological_process	0.068625	0.74952	17	17150	52	76974	8	9
GO:0004017	adenylate kinase activity	molecular_function	0.095586	0.88863	12	17150	37	76974	8	4
GO:0033897	ribonuclease T2 activity	molecular_function	0.29641	1	10	17150	38	76974	8	2
GO:0000079	regulation of cyclin-dependent protein serine/threonine kinase activity	biological_process	0.331	1	9	17150	35	76974	8	1
GO:0071900	regulation of protein serine/threonine kinase activity	biological_process	0.331	1	9	17150	35	76974	8	1
GO:1904029	regulation of cyclin-dependent protein kinase activity	biological_process	0.331	1	9	17150	35	76974	8	1
GO:0016846	carbon-sulfur lyase activity	molecular_function	0.33512	1	16	17150	68	76974	8	8
GO:0008172	S-methyltransferase activity	molecular_function	0.34673	1	19	17150	77	76974	8	11
GO:0046933	proton-transporting ATP synthase activity, rotational mechanism	molecular_function	0.35704	1	10	17150	40	76974	8	2
GO:0006801	superoxide metabolic process	biological_process	0.47622	1	10	17150	48	76974	8	2
GO:0072593	reactive oxygen species metabolic process	biological_process	0.47622	1	10	17150	48	76974	8	2
GO:0016855	racemase and epimerase activity, acting on amino acids and derivatives	molecular_function	0.48504	1	10	17150	42	76974	8	2
GO:0036361	racemase activity, acting on amino acids and derivatives	molecular_function	0.48504	1	10	17150	42	76974	8	2
GO:0006626	protein targeting to mitochondrion	biological_process	0.51272	1	17	17150	76	76974	8	9
GO:0030145	manganese ion binding	molecular_function	0.52178	1	9	17150	40	76974	8	1
GO:0070585	protein localization to mitochondrion	biological_process	0.56003	1	17	17150	78	76974	8	9
GO:0072655	establishment of protein localization to mitochondrion	biological_process	0.56003	1	17	17150	78	76974	8	9
GO:0007276	gamete generation	biological_process	0.56656	1	13	17150	60	76974	8	5
GO:0005234	extracellular-glutamate-gated ion channel activity	molecular_function	0.61072	1	16	17150	72	76974	8	8
GO:0005787	signal peptidase complex	cellular_component	0.65951	1	11	17150	54	76974	8	3
GO:0006465	signal peptide processing	biological_process	0.65951	1	11	17150	54	76974	8	3
GO:0033926	glycopeptide alpha-N-acetylgalactosaminidase activity	molecular_function	0.66448	1	14	17150	66	76974	8	6
GO:0051052	regulation of DNA metabolic process	biological_process	0.67591	1	9	17150	44	76974	8	1
GO:0042147	retrograde transport, endosome to Golgi	biological_process	0.68793	1	17	17150	80	76974	8	9
GO:0007029	endoplasmic reticulum organization	biological_process	0.68851	1	11	17150	54	76974	8	3
GO:0005231	excitatory extracellular ligand-gated ion channel activity	molecular_function	0.70103	1	16	17150	76	76974	8	8
GO:0019843	rRNA binding	molecular_function	0.7013	1	12	17150	65	76974	8	4
GO:0004725	protein tyrosine phosphatase activity	molecular_function	0.70476	1	24	17150	116	76974	8	16
GO:0016884	carbon-nitrogen ligase activity, with glutamine as amido-N-donor	molecular_function	0.71245	1	10	17150	49	76974	8	2
GO:0022904	respiratory electron transport chain	biological_process	0.72679	1	17	17150	89	76974	8	9
GO:0003873	6-phosphofructo-2-kinase activity	molecular_function	0.73231	1	14	17150	72	76974	8	6
GO:0006000	fructose metabolic process	biological_process	0.73231	1	14	17150	72	76974	8	6
GO:0016641	oxidoreductase activity, acting on the CH-NH2 group of donors, oxygen as acceptor	molecular_function	0.73264	1	19	17150	95	76974	8	11
GO:0048609	multicellular organismal reproductive process	biological_process	0.7361	1	13	17150	67	76974	8	5
GO:0006220	pyrimidine nucleotide metabolic process	biological_process	0.74059	1	11	17150	59	76974	8	3
GO:0006221	pyrimidine nucleotide biosynthetic process	biological_process	0.74059	1	11	17150	59	76974	8	3
GO:0035091	phosphatidylinositol binding	molecular_function	0.74416	1	19	17150	93	76974	8	11
GO:0000159	protein phosphatase type 2A complex	cellular_component	0.74541	1	11	17150	55	76974	8	3
GO:0098803	respiratory chain complex	cellular_component	0.74589	1	12	17150	68	76974	8	4
GO:0030904	retromer complex	cellular_component	0.75369	1	15	17150	74	76974	8	7
GO:0007020	microtubule nucleation	biological_process	0.76144	1	13	17150	65	76974	8	5
GO:0046785	microtubule polymerization	biological_process	0.76144	1	13	17150	65	76974	8	5
GO:0032504	multicellular organism reproduction	biological_process	0.79406	1	13	17150	70	76974	8	5
GO:0002097	tRNA wobble base modification	biological_process	0.82271	1	13	17150	70	76974	8	5
GO:0008146	sulfotransferase activity	molecular_function	0.82422	1	12	17150	70	76974	8	4
GO:0016197	endosomal transport	biological_process	0.83121	1	17	17150	89	76974	8	9
GO:0042546	cell wall biogenesis	biological_process	0.85804	1	11	17150	62	76974	8	3
GO:0000276	mitochondrial proton-transporting ATP synthase complex, coupling factor F(o)	cellular_component	0.86212	1	16	17150	94	76974	8	8
GO:0009982	pseudouridine synthase activity	molecular_function	0.86954	1	12	17150	69	76974	8	4
GO:0019048	modulation by virus of host morphology or physiology	biological_process	0.89206	1	15	17150	88	76974	8	7
GO:0031109	microtubule polymerization or depolymerization	biological_process	0.89224	1	13	17150	74	76974	8	5
GO:0008083	growth factor activity	molecular_function	0.90264	1	11	17150	67	76974	8	3
GO:0015293	symporter activity	molecular_function	0.90374	1	16	17150	93	76974	8	8
GO:0016149	translation release factor activity, codon specific	molecular_function	0.90871	1	9	17150	55	76974	8	1
GO:0042025	host cell nucleus	cellular_component	0.91435	1	15	17150	91	76974	8	7
GO:0006891	intra-Golgi vesicle-mediated transport	biological_process	0.93381	1	19	17150	111	76974	8	11
GO:0033227	dsRNA transport	biological_process	0.93423	1	11	17150	80	76974	8	3
GO:0051032	nucleic acid transmembrane transporter activity	molecular_function	0.93423	1	11	17150	80	76974	8	3
GO:0051033	RNA transmembrane transporter activity	molecular_function	0.93423	1	11	17150	80	76974	8	3
GO:0003860	3-hydroxyisobutyryl-CoA hydrolase activity	molecular_function	0.94331	1	13	17150	83	76974	8	5
GO:0016289	CoA hydrolase activity	molecular_function	0.94331	1	13	17150	83	76974	8	5
GO:0015144	carbohydrate transmembrane transporter activity	molecular_function	0.94929	1	22	17150	138	76974	8	14
GO:1901476	carbohydrate transporter activity	molecular_function	0.94929	1	22	17150	138	76974	8	14
GO:0001522	pseudouridine synthesis	biological_process	0.9503	1	13	17150	85	76974	8	5
GO:0033647	host intracellular organelle	cellular_component	0.95774	1	15	17150	98	76974	8	7
GO:0033648	host intracellular membrane-bounded organelle	cellular_component	0.95774	1	15	17150	98	76974	8	7
GO:0006368	transcription elongation from RNA polymerase II promoter	biological_process	0.9615	1	15	17150	97	76974	8	7
GO:0004535	poly(A)-specific ribonuclease activity	molecular_function	0.96352	1	12	17150	82	76974	8	4
GO:0033646	host intracellular part	cellular_component	0.969	1	16	17150	106	76974	8	8
GO:0043656	intracellular region of host	cellular_component	0.969	1	16	17150	106	76974	8	8
GO:0006354	DNA-templated transcription, elongation	biological_process	0.97269	1	15	17150	100	76974	8	7
GO:0015743	malate transport	biological_process	0.97749	1	13	17150	92	76974	8	5
GO:0005085	guanyl-nucleotide exchange factor activity	molecular_function	0.98328	1	11	17150	79	76974	8	3
GO:0098542	defense response to other organism	biological_process	0.98651	1	20	17150	138	76974	8	12
GO:0000175	3'-5'-exoribonuclease activity	molecular_function	0.98919	1	13	17150	97	76974	8	5
GO:0004532	exoribonuclease activity	molecular_function	0.98919	1	13	17150	97	76974	8	5
GO:0016896	exoribonuclease activity, producing 5'-phosphomonoesters	molecular_function	0.98919	1	13	17150	97	76974	8	5
GO:0005672	transcription factor TFIIA complex	cellular_component	0.99841	1	19	17150	145	76974	8	11
GO:0016459	myosin complex	cellular_component	0.99993	1	17	17150	153	76974	8	9
GO:0006739	NADP metabolic process	biological_process	0.0022722	0.084686	27	17150	71	76974	7	20
GO:0055076	transition metal ion homeostasis	biological_process	0.011627	0.28437	14	17150	36	76974	7	7
GO:0008661	1-deoxy-D-xylulose-5-phosphate synthase activity	molecular_function	0.025682	0.47295	19	17150	54	76974	7	12
GO:0016744	transferase activity, transferring aldehyde or ketonic groups	molecular_function	0.025682	0.47295	19	17150	54	76974	7	12
GO:0003880	protein C-terminal carboxyl O-methyltransferase activity	molecular_function	0.033986	0.55999	8	17150	19	76974	7	1
GO:0004671	protein C-terminal S-isoprenylcysteine carboxyl O-methyltransferase activity	molecular_function	0.033986	0.55999	8	17150	19	76974	7	1
GO:0006481	C-terminal protein methylation	biological_process	0.033986	0.55999	8	17150	19	76974	7	1
GO:0010340	carboxyl-O-methyltransferase activity	molecular_function	0.033986	0.55999	8	17150	19	76974	7	1
GO:0018410	C-terminal protein amino acid modification	biological_process	0.033986	0.55999	8	17150	19	76974	7	1
GO:0043687	post-translational protein modification	biological_process	0.033986	0.55999	8	17150	19	76974	7	1
GO:0051998	protein carboxyl O-methyltransferase activity	molecular_function	0.033986	0.55999	8	17150	19	76974	7	1
GO:0007007	inner mitochondrial membrane organization	biological_process	0.042496	0.62513	12	17150	32	76974	7	5
GO:0042407	cristae formation	biological_process	0.042496	0.62513	12	17150	32	76974	7	5
GO:0061617	MICOS complex	cellular_component	0.042496	0.62513	12	17150	32	76974	7	5
GO:0031304	intrinsic component of mitochondrial inner membrane	cellular_component	0.052634	0.66983	12	17150	33	76974	7	5
GO:0031305	integral component of mitochondrial inner membrane	cellular_component	0.052634	0.66983	12	17150	33	76974	7	5
GO:0032592	integral component of mitochondrial membrane	cellular_component	0.052634	0.66983	12	17150	33	76974	7	5
GO:0098573	intrinsic component of mitochondrial membrane	cellular_component	0.052634	0.66983	12	17150	33	76974	7	5
GO:0003917	DNA topoisomerase type I activity	molecular_function	0.05355	0.67088	12	17150	33	76974	7	5
GO:0019887	protein kinase regulator activity	molecular_function	0.058213	0.70308	16	17150	50	76974	7	9
GO:0007219	Notch signaling pathway	biological_process	0.064807	0.73168	9	17150	24	76974	7	2
GO:0004864	protein phosphatase inhibitor activity	molecular_function	0.068509	0.74952	9	17150	24	76974	7	2
GO:0019212	phosphatase inhibitor activity	molecular_function	0.068509	0.74952	9	17150	24	76974	7	2
GO:0008199	ferric iron binding	molecular_function	0.068526	0.74952	13	17150	40	76974	7	6
GO:0006081	cellular aldehyde metabolic process	biological_process	0.073306	0.7659	23	17150	77	76974	7	16
GO:0016799	hydrolase activity, hydrolyzing N-glycosyl compounds	molecular_function	0.14292	1	14	17150	47	76974	7	7
GO:0045786	negative regulation of cell cycle	biological_process	0.14446	1	22	17150	80	76974	7	15
GO:0071203	WASH complex	cellular_component	0.1584	1	11	17150	36	76974	7	4
GO:0000394	RNA splicing, via endonucleolytic cleavage and ligation	biological_process	0.22514	1	12	17150	43	76974	7	5
GO:0006388	tRNA splicing, via endonucleolytic cleavage and ligation	biological_process	0.22514	1	12	17150	43	76974	7	5
GO:0031023	microtubule organizing center organization	biological_process	0.25289	1	20	17150	76	76974	7	13
GO:0005086	ARF guanyl-nucleotide exchange factor activity	molecular_function	0.2641	1	8	17150	27	76974	7	1
GO:0032011	ARF protein signal transduction	biological_process	0.2641	1	8	17150	27	76974	7	1
GO:0032012	regulation of ARF protein signal transduction	biological_process	0.2641	1	8	17150	27	76974	7	1
GO:0015969	guanosine tetraphosphate metabolic process	biological_process	0.2755	1	11	17150	39	76974	7	4
GO:0034035	purine ribonucleoside bisphosphate metabolic process	biological_process	0.2755	1	11	17150	39	76974	7	4
GO:0007224	smoothened signaling pathway	biological_process	0.28304	1	10	17150	41	76974	7	3
GO:0031225	anchored component of membrane	cellular_component	0.29988	1	7	17150	25	76974	7	0
GO:0051346	negative regulation of hydrolase activity	biological_process	0.32569	1	10	17150	40	76974	7	3
GO:0031400	negative regulation of protein modification process	biological_process	0.3329	1	15	17150	60	76974	7	8
GO:0015696	ammonium transport	biological_process	0.35342	1	11	17150	43	76974	7	4
GO:0016157	sucrose synthase activity	molecular_function	0.35693	1	25	17150	100	76974	7	18
GO:0004064	arylesterase activity	molecular_function	0.3834	1	8	17150	31	76974	7	1
GO:1990542	mitochondrial transmembrane transport	biological_process	0.39067	1	16	17150	66	76974	7	9
GO:0042180	cellular ketone metabolic process	biological_process	0.43589	1	15	17150	64	76974	7	8
GO:0008519	ammonium transmembrane transporter activity	molecular_function	0.4494	1	11	17150	46	76974	7	4
GO:0004843	ubiquitin-specific protease activity	molecular_function	0.48422	1	13	17150	56	76974	7	6
GO:0009069	serine family amino acid metabolic process	biological_process	0.49211	1	16	17150	68	76974	7	9
GO:0003950	NAD+ ADP-ribosyltransferase activity	molecular_function	0.54939	1	15	17150	66	76974	7	8
GO:0005885	Arp2/3 protein complex	cellular_component	0.55044	1	8	17150	36	76974	7	1
GO:0010639	negative regulation of organelle organization	biological_process	0.60537	1	20	17150	94	76974	7	13
GO:0000790	nuclear chromatin	cellular_component	0.60812	1	16	17150	76	76974	7	9
GO:0016755	transferase activity, transferring amino-acyl groups	molecular_function	0.61859	1	13	17150	61	76974	7	6
GO:0030838	positive regulation of actin filament polymerization	biological_process	0.62055	1	8	17150	38	76974	7	1
GO:0031334	positive regulation of protein complex assembly	biological_process	0.62055	1	8	17150	38	76974	7	1
GO:0032273	positive regulation of protein polymerization	biological_process	0.62055	1	8	17150	38	76974	7	1
GO:0034314	Arp2/3 complex-mediated actin nucleation	biological_process	0.62055	1	8	17150	38	76974	7	1
GO:0044089	positive regulation of cellular component biogenesis	biological_process	0.62055	1	8	17150	38	76974	7	1
GO:0045010	actin nucleation	biological_process	0.62055	1	8	17150	38	76974	7	1
GO:0051495	positive regulation of cytoskeleton organization	biological_process	0.62055	1	8	17150	38	76974	7	1
GO:0004096	catalase activity	molecular_function	0.64445	1	10	17150	47	76974	7	3
GO:0052126	movement in host environment	biological_process	0.65337	1	13	17150	62	76974	7	6
GO:0052192	movement in environment of other organism involved in symbiotic interaction	biological_process	0.65337	1	13	17150	62	76974	7	6
GO:0019087	transformation of host cell by virus	biological_process	0.65653	1	9	17150	44	76974	7	2
GO:1902495	transmembrane transporter complex	cellular_component	0.69674	1	15	17150	78	76974	7	8
GO:1990351	transporter complex	cellular_component	0.69674	1	15	17150	78	76974	7	8
GO:0051205	protein insertion into membrane	biological_process	0.71472	1	9	17150	46	76974	7	2
GO:0009539	photosystem II reaction center	cellular_component	0.7351	1	10	17150	52	76974	7	3
GO:0051129	negative regulation of cellular component organization	biological_process	0.75971	1	20	17150	102	76974	7	13
GO:0042775	mitochondrial ATP synthesis coupled electron transport	biological_process	0.76282	1	14	17150	76	76974	7	7
GO:0042600	chorion	cellular_component	0.77579	1	9	17150	49	76974	7	2
GO:0007265	Ras protein signal transduction	biological_process	0.82331	1	8	17150	44	76974	7	1
GO:0046578	regulation of Ras protein signal transduction	biological_process	0.82331	1	8	17150	44	76974	7	1
GO:0048468	cell development	biological_process	0.83584	1	14	17150	81	76974	7	7
GO:0051056	regulation of small GTPase mediated signal transduction	biological_process	0.85554	1	8	17150	46	76974	7	1
GO:0032182	ubiquitin-like protein binding	molecular_function	0.85982	1	15	17150	84	76974	7	8
GO:0005126	cytokine receptor binding	molecular_function	0.86623	1	11	17150	63	76974	7	4
GO:0006119	oxidative phosphorylation	biological_process	0.86828	1	14	17150	83	76974	7	7
GO:0042773	ATP synthesis coupled electron transport	biological_process	0.86828	1	14	17150	83	76974	7	7
GO:0051302	regulation of cell division	biological_process	0.89416	1	18	17150	102	76974	7	11
GO:0015294	solute:cation symporter activity	molecular_function	0.89491	1	15	17150	87	76974	7	8
GO:0008536	Ran GTPase binding	molecular_function	0.90593	1	14	17150	80	76974	7	7
GO:0043021	ribonucleoprotein complex binding	molecular_function	0.94806	1	12	17150	80	76974	7	5
GO:0032879	regulation of localization	biological_process	0.95806	1	17	17150	110	76974	7	10
GO:0048038	quinone binding	molecular_function	0.97343	1	16	17150	103	76974	7	9
GO:0006094	gluconeogenesis	biological_process	0.9865	1	16	17150	110	76974	7	9
GO:0019319	hexose biosynthetic process	biological_process	0.9865	1	16	17150	110	76974	7	9
GO:0046364	monosaccharide biosynthetic process	biological_process	0.9865	1	16	17150	110	76974	7	9
GO:0003006	developmental process involved in reproduction	biological_process	0.99017	1	11	17150	85	76974	7	4
GO:0004143	diacylglycerol kinase activity	molecular_function	0.0020416	0.077316	15	17150	32	76974	6	9
GO:0019682	glyceraldehyde-3-phosphate metabolic process	biological_process	0.0029659	0.10394	19	17150	46	76974	6	13
GO:0006098	pentose-phosphate shunt	biological_process	0.0032272	0.10672	18	17150	43	76974	6	12
GO:0051156	glucose 6-phosphate metabolic process	biological_process	0.0032272	0.10672	18	17150	43	76974	6	12
GO:0010035	response to inorganic substance	biological_process	0.018226	0.38039	19	17150	56	76974	6	13
GO:0001514	selenocysteine incorporation	biological_process	0.03277	0.55422	7	17150	15	76974	6	1
GO:0006451	translational readthrough	biological_process	0.03277	0.55422	7	17150	15	76974	6	1
GO:0009081	branched-chain amino acid metabolic process	biological_process	0.085168	0.82464	9	17150	25	76974	6	3
GO:0009082	branched-chain amino acid biosynthetic process	biological_process	0.085168	0.82464	9	17150	25	76974	6	3
GO:0003972	RNA ligase (ATP) activity	molecular_function	0.13568	1	10	17150	31	76974	6	4
GO:0003856	3-dehydroquinate synthase activity	molecular_function	0.13732	1	6	17150	16	76974	6	0
GO:0004176	ATP-dependent peptidase activity	molecular_function	0.14141	1	13	17150	42	76974	6	7
GO:0019104	DNA N-glycosylase activity	molecular_function	0.14694	1	9	17150	28	76974	6	3
GO:0004345	glucose-6-phosphate dehydrogenase activity	molecular_function	0.16892	1	13	17150	43	76974	6	7
GO:0008452	RNA ligase activity	molecular_function	0.17974	1	10	17150	33	76974	6	4
GO:1901661	quinone metabolic process	biological_process	0.17987	1	14	17150	49	76974	6	8
GO:1901663	quinone biosynthetic process	biological_process	0.17987	1	14	17150	49	76974	6	8
GO:0005829	cytosol	cellular_component	0.1987	1	10	17150	34	76974	6	4
GO:0031082	BLOC complex	cellular_component	0.1987	1	10	17150	34	76974	6	4
GO:0031083	BLOC-1 complex	cellular_component	0.1987	1	10	17150	34	76974	6	4
GO:0044445	cytosolic part	cellular_component	0.1987	1	10	17150	34	76974	6	4
GO:0042181	ketone biosynthetic process	biological_process	0.20269	1	14	17150	50	76974	6	8
GO:0017025	TBP-class protein binding	molecular_function	0.2215	1	12	17150	42	76974	6	6
GO:0018580	nitronate monooxygenase activity	molecular_function	0.2257	1	18	17150	68	76974	6	12
GO:0016728	oxidoreductase activity, acting on CH or CH2 groups, disulfide as acceptor	molecular_function	0.2284	1	7	17150	23	76974	6	1
GO:0007283	spermatogenesis	biological_process	0.22965	1	10	17150	35	76974	6	4
GO:0048232	male gamete generation	biological_process	0.22965	1	10	17150	35	76974	6	4
GO:0016843	amine-lyase activity	molecular_function	0.27257	1	10	17150	37	76974	6	4
GO:0016844	strictosidine synthase activity	molecular_function	0.27257	1	10	17150	37	76974	6	4
GO:0070569	uridylyltransferase activity	molecular_function	0.27834	1	11	17150	41	76974	6	5
GO:0004579	dolichyl-diphosphooligosaccharide-protein glycotransferase activity	molecular_function	0.28985	1	9	17150	33	76974	6	3
GO:0004806	triglyceride lipase activity	molecular_function	0.32227	1	8	17150	29	76974	6	2
GO:0000372	Group I intron splicing	biological_process	0.33781	1	10	17150	37	76974	6	4
GO:0000376	RNA splicing, via transesterification reactions with guanosine as nucleophile	biological_process	0.33781	1	10	17150	37	76974	6	4
GO:0003883	CTP synthase activity	molecular_function	0.34216	1	6	17150	21	76974	6	0
GO:0098589	membrane region	cellular_component	0.345	1	10	17150	39	76974	6	4
GO:0008417	fucosyltransferase activity	molecular_function	0.36748	1	10	17150	38	76974	6	4
GO:0004470	malic enzyme activity	molecular_function	0.4235	1	15	17150	61	76974	6	9
GO:0004471	malate dehydrogenase (decarboxylating) (NAD+) activity	molecular_function	0.4235	1	15	17150	61	76974	6	9
GO:0016615	malate dehydrogenase activity	molecular_function	0.44355	1	16	17150	66	76974	6	10
GO:0050151	oleate hydratase activity	molecular_function	0.45159	1	8	17150	32	76974	6	2
GO:0051766	inositol trisphosphate kinase activity	molecular_function	0.46461	1	9	17150	38	76974	6	3
GO:0008837	diaminopimelate epimerase activity	molecular_function	0.47216	1	8	17150	33	76974	6	2
GO:0047661	amino-acid racemase activity	molecular_function	0.47216	1	8	17150	33	76974	6	2
GO:0005451	monovalent cation:proton antiporter activity	molecular_function	0.47696	1	11	17150	46	76974	6	5
GO:0015491	cation:cation antiporter activity	molecular_function	0.47696	1	11	17150	46	76974	6	5
GO:0045861	negative regulation of proteolysis	biological_process	0.49771	1	15	17150	66	76974	6	9
GO:0044391	ribosomal subunit	cellular_component	0.55529	1	6	17150	29	76974	6	0
GO:1901677	phosphate transmembrane transporter activity	molecular_function	0.58072	1	16	17150	73	76974	6	10
GO:0006013	mannose metabolic process	biological_process	0.58496	1	10	17150	45	76974	6	4
GO:0046912	transferase activity, transferring acyl groups, acyl groups converted into alkyl on transfer	molecular_function	0.60039	1	14	17150	65	76974	6	8
GO:0006597	spermine biosynthetic process	biological_process	0.61616	1	7	17150	32	76974	6	1
GO:0008215	spermine metabolic process	biological_process	0.61616	1	7	17150	32	76974	6	1
GO:0008131	primary amine oxidase activity	molecular_function	0.62963	1	15	17150	69	76974	6	9
GO:0000070	mitotic sister chromatid segregation	biological_process	0.63143	1	19	17150	89	76974	6	13
GO:0000819	sister chromatid segregation	biological_process	0.63143	1	19	17150	89	76974	6	13
GO:0044275	cellular carbohydrate catabolic process	biological_process	0.63765	1	7	17150	34	76974	6	1
GO:0005315	inorganic phosphate transmembrane transporter activity	molecular_function	0.64465	1	11	17150	53	76974	6	5
GO:0006817	phosphate ion transport	biological_process	0.65063	1	12	17150	58	76974	6	6
GO:0004014	adenosylmethionine decarboxylase activity	molecular_function	0.65124	1	7	17150	33	76974	6	1
GO:0008216	spermidine metabolic process	biological_process	0.65124	1	7	17150	33	76974	6	1
GO:0008295	spermidine biosynthetic process	biological_process	0.65124	1	7	17150	33	76974	6	1
GO:0030260	entry into host cell	biological_process	0.66486	1	10	17150	48	76974	6	4
GO:0044409	entry into host	biological_process	0.66486	1	10	17150	48	76974	6	4
GO:0046718	viral entry into host cell	biological_process	0.66486	1	10	17150	48	76974	6	4
GO:0051806	entry into cell of other organism involved in symbiotic interaction	biological_process	0.66486	1	10	17150	48	76974	6	4
GO:0051828	entry into other organism involved in symbiotic interaction	biological_process	0.66486	1	10	17150	48	76974	6	4
GO:0019236	response to pheromone	biological_process	0.68216	1	9	17150	44	76974	6	3
GO:0002161	aminoacyl-tRNA editing activity	molecular_function	0.68445	1	8	17150	39	76974	6	2
GO:0006544	glycine metabolic process	biological_process	0.69063	1	13	17150	62	76974	6	7
GO:0050793	regulation of developmental process	biological_process	0.69113	1	15	17150	76	76974	6	9
GO:0016706	oxidoreductase activity, acting on paired donors, with incorporation or reduction of molecular oxygen, 2-oxoglutarate as one donor, and incorporation of one atom each of oxygen into both donors	molecular_function	0.70588	1	9	17150	45	76974	6	3
GO:0009967	positive regulation of signal transduction	biological_process	0.7195	1	11	17150	56	76974	6	5
GO:0010647	positive regulation of cell communication	biological_process	0.7195	1	11	17150	56	76974	6	5
GO:0023056	positive regulation of signaling	biological_process	0.7195	1	11	17150	56	76974	6	5
GO:0002098	tRNA wobble uridine modification	biological_process	0.73092	1	10	17150	50	76974	6	4
GO:0006595	polyamine metabolic process	biological_process	0.74146	1	7	17150	36	76974	6	1
GO:0006596	polyamine biosynthetic process	biological_process	0.74146	1	7	17150	36	76974	6	1
GO:0097164	ammonium ion metabolic process	biological_process	0.74146	1	7	17150	36	76974	6	1
GO:0017004	cytochrome complex assembly	biological_process	0.7464	1	10	17150	53	76974	6	4
GO:0007051	spindle organization	biological_process	0.75519	1	7	17150	37	76974	6	1
GO:0009847	spore germination	biological_process	0.76649	1	9	17150	48	76974	6	3
GO:0004650	polygalacturonase activity	molecular_function	0.77339	1	11	17150	58	76974	6	5
GO:0008138	protein tyrosine/serine/threonine phosphatase activity	molecular_function	0.77382	1	26	17150	129	76974	6	20
GO:0004523	RNA-DNA hybrid ribonuclease activity	molecular_function	0.80911	1	12	17150	64	76974	6	6
GO:0008964	phosphoenolpyruvate carboxylase activity	molecular_function	0.8156	1	8	17150	44	76974	6	2
GO:0048284	organelle fusion	biological_process	0.81574	1	16	17150	86	76974	6	10
GO:0045735	nutrient reservoir activity	molecular_function	0.82658	1	15	17150	90	76974	6	9
GO:0030162	regulation of proteolysis	biological_process	0.83096	1	17	17150	91	76974	6	11
GO:0006302	double-strand break repair	biological_process	0.83345	1	13	17150	72	76974	6	7
GO:0009309	amine biosynthetic process	biological_process	0.83374	1	7	17150	40	76974	6	1
GO:0042401	cellular biogenic amine biosynthetic process	biological_process	0.83374	1	7	17150	40	76974	6	1
GO:0015977	carbon fixation	biological_process	0.83541	1	8	17150	45	76974	6	2
GO:0048584	positive regulation of response to stimulus	biological_process	0.84519	1	11	17150	63	76974	6	5
GO:0044801	single-organism membrane fusion	biological_process	0.85654	1	16	17150	89	76974	6	10
GO:0031625	ubiquitin protein ligase binding	molecular_function	0.86231	1	10	17150	56	76974	6	4
GO:0044389	ubiquitin-like protein ligase binding	molecular_function	0.86231	1	10	17150	56	76974	6	4
GO:0005759	mitochondrial matrix	cellular_component	0.86645	1	7	17150	44	76974	6	1
GO:0002682	regulation of immune system process	biological_process	0.87336	1	10	17150	61	76974	6	4
GO:0016814	hydrolase activity, acting on carbon-nitrogen (but not peptide) bonds, in cyclic amidines	molecular_function	0.88756	1	12	17150	71	76974	6	6
GO:0051235	maintenance of location	biological_process	0.89847	1	13	17150	77	76974	6	7
GO:0030955	potassium ion binding	molecular_function	0.90111	1	16	17150	90	76974	6	10
GO:0031420	alkali metal ion binding	molecular_function	0.90111	1	16	17150	90	76974	6	10
GO:2001070	starch binding	molecular_function	0.90386	1	13	17150	77	76974	6	7
GO:0016247	channel regulator activity	molecular_function	0.93792	1	8	17150	55	76974	6	2
GO:0007031	peroxisome organization	biological_process	0.97041	1	8	17150	66	76974	6	2
GO:0004866	endopeptidase inhibitor activity	molecular_function	0.9768	1	10	17150	79	76974	6	4
GO:0061135	endopeptidase regulator activity	molecular_function	0.9768	1	10	17150	79	76974	6	4
GO:0003909	DNA ligase activity	molecular_function	0.98032	1	10	17150	73	76974	6	4
GO:0030414	peptidase inhibitor activity	molecular_function	0.98811	1	11	17150	90	76974	6	5
GO:0061134	peptidase regulator activity	molecular_function	0.98811	1	11	17150	90	76974	6	5
GO:0009507	chloroplast	cellular_component	0.99637	1	11	17150	103	76974	6	5
GO:0009536	plastid	cellular_component	0.99637	1	11	17150	103	76974	6	5
GO:0003968	RNA-directed RNA polymerase activity	molecular_function	0.99895	1	17	17150	136	76974	6	11
GO:0030119	AP-type membrane coat adaptor complex	cellular_component	0.99997	1	9	17150	120	76974	6	3
GO:0007205	protein kinase C-activating G-protein coupled receptor signaling pathway	biological_process	0.0048589	0.14913	13	17150	28	76974	5	8
GO:0004807	triose-phosphate isomerase activity	molecular_function	0.0056563	0.16633	8	17150	15	76974	5	3
GO:0019089	transmission of virus	biological_process	0.012195	0.29148	11	17150	25	76974	5	6
GO:0044007	dissemination or transmission of symbiont from host	biological_process	0.012195	0.29148	11	17150	25	76974	5	6
GO:0051821	dissemination or transmission of organism from other organism involved in symbiotic interaction	biological_process	0.012195	0.29148	11	17150	25	76974	5	6
GO:0007423	sensory organ development	biological_process	0.015009	0.32738	7	17150	13	76974	5	2
GO:0019310	inositol catabolic process	biological_process	0.015128	0.32738	5	17150	8	76974	5	0
GO:0046164	alcohol catabolic process	biological_process	0.015128	0.32738	5	17150	8	76974	5	0
GO:0046174	polyol catabolic process	biological_process	0.015128	0.32738	5	17150	8	76974	5	0
GO:0050113	inositol oxygenase activity	molecular_function	0.015128	0.32738	5	17150	8	76974	5	0
GO:1901616	organic hydroxy compound catabolic process	biological_process	0.015128	0.32738	5	17150	8	76974	5	0
GO:0046537	2,3-bisphosphoglycerate-independent phosphoglycerate mutase activity	molecular_function	0.018105	0.38039	9	17150	21	76974	5	4
GO:0000156	phosphorelay response regulator activity	molecular_function	0.020844	0.41352	7	17150	14	76974	5	2
GO:0006879	cellular iron ion homeostasis	biological_process	0.021574	0.42212	11	17150	28	76974	5	6
GO:0046916	cellular transition metal ion homeostasis	biological_process	0.021574	0.42212	11	17150	28	76974	5	6
GO:0055072	iron ion homeostasis	biological_process	0.021574	0.42212	11	17150	28	76974	5	6
GO:0046658	anchored component of plasma membrane	cellular_component	0.028576	0.50831	5	17150	9	76974	5	0
GO:0003847	1-alkyl-2-acetylglycerophosphocholine esterase activity	molecular_function	0.031381	0.54526	7	17150	15	76974	5	2
GO:0003964	RNA-directed DNA polymerase activity	molecular_function	0.046809	0.63586	9	17150	22	76974	5	4
GO:0009664	plant-type cell wall organization	biological_process	0.048939	0.65022	18	17150	57	76974	5	13
GO:0071669	plant-type cell wall organization or biogenesis	biological_process	0.048939	0.65022	18	17150	57	76974	5	13
GO:0017048	Rho GTPase binding	molecular_function	0.049373	0.65022	8	17150	19	76974	5	3
GO:0006743	ubiquinone metabolic process	biological_process	0.069743	0.74952	13	17150	39	76974	5	8
GO:0006744	ubiquinone biosynthetic process	biological_process	0.069743	0.74952	13	17150	39	76974	5	8
GO:0004455	ketol-acid reductoisomerase activity	molecular_function	0.080651	0.79734	7	17150	18	76974	5	2
GO:0070071	proton-transporting two-sector ATPase complex assembly	biological_process	0.088177	0.84121	9	17150	27	76974	5	4
GO:0003906	DNA-(apurinic or apyrimidinic site) lyase activity	molecular_function	0.093753	0.87702	7	17150	18	76974	5	2
GO:0009512	cytochrome b6f complex	cellular_component	0.097599	0.89112	5	17150	12	76974	5	0
GO:0009790	embryo development	biological_process	0.098853	0.89617	13	17150	41	76974	5	8
GO:0000062	fatty-acyl-CoA binding	molecular_function	0.10096	0.89969	10	17150	31	76974	5	5
GO:0030155	regulation of cell adhesion	biological_process	0.15405	1	13	17150	44	76974	5	8
GO:0000097	sulfur amino acid biosynthetic process	biological_process	0.16693	1	14	17150	47	76974	5	9
GO:0019203	carbohydrate phosphatase activity	molecular_function	0.21636	1	7	17150	22	76974	5	2
GO:0050308	sugar-phosphatase activity	molecular_function	0.21636	1	7	17150	22	76974	5	2
GO:0033202	DNA helicase complex	cellular_component	0.25606	1	10	17150	35	76974	5	5
GO:0016778	diphosphotransferase activity	molecular_function	0.27074	1	10	17150	36	76974	5	5
GO:0046789	host cell surface receptor binding	molecular_function	0.27318	1	6	17150	20	76974	5	1
GO:0009636	response to toxic substance	biological_process	0.284	1	11	17150	42	76974	5	6
GO:0008107	galactoside 2-alpha-L-fucosyltransferase activity	molecular_function	0.30836	1	8	17150	28	76974	5	3
GO:0031127	alpha-(1,2)-fucosyltransferase activity	molecular_function	0.30836	1	8	17150	28	76974	5	3
GO:0006020	inositol metabolic process	biological_process	0.3142	1	16	17150	62	76974	5	11
GO:0046812	host cell surface binding	molecular_function	0.31753	1	6	17150	21	76974	5	1
GO:0048513	organ development	biological_process	0.33636	1	8	17150	29	76974	5	3
GO:0031011	Ino80 complex	cellular_component	0.33686	1	8	17150	29	76974	5	3
GO:0097346	INO80-type complex	cellular_component	0.33686	1	8	17150	29	76974	5	3
GO:0000096	sulfur amino acid metabolic process	biological_process	0.34612	1	17	17150	67	76974	5	12
GO:0051239	regulation of multicellular organismal process	biological_process	0.3643	1	14	17150	57	76974	5	9
GO:0010948	negative regulation of cell cycle process	biological_process	0.37795	1	16	17150	66	76974	5	11
GO:0015385	sodium:proton antiporter activity	molecular_function	0.39854	1	10	17150	39	76974	5	5
GO:0016670	oxidoreductase activity, acting on a sulfur group of donors, oxygen as acceptor	molecular_function	0.40592	1	9	17150	36	76974	5	4
GO:0015098	molybdate ion transmembrane transporter activity	molecular_function	0.40636	1	13	17150	52	76974	5	8
GO:0015689	molybdate ion transport	biological_process	0.40636	1	13	17150	52	76974	5	8
GO:0035303	regulation of dephosphorylation	biological_process	0.40662	1	5	17150	19	76974	5	0
GO:0035304	regulation of protein dephosphorylation	biological_process	0.40662	1	5	17150	19	76974	5	0
GO:0006213	pyrimidine nucleoside metabolic process	biological_process	0.46137	1	11	17150	48	76974	5	6
GO:0032957	inositol trisphosphate metabolic process	biological_process	0.46423	1	6	17150	24	76974	5	1
GO:0043647	inositol phosphate metabolic process	biological_process	0.46423	1	6	17150	24	76974	5	1
GO:0047325	inositol tetrakisphosphate 1-kinase activity	molecular_function	0.46423	1	6	17150	24	76974	5	1
GO:0051765	inositol tetrakisphosphate kinase activity	molecular_function	0.46423	1	6	17150	24	76974	5	1
GO:0052725	inositol-1,3,4-trisphosphate 6-kinase activity	molecular_function	0.46423	1	6	17150	24	76974	5	1
GO:0052726	inositol-1,3,4-trisphosphate 5-kinase activity	molecular_function	0.46423	1	6	17150	24	76974	5	1
GO:0051348	negative regulation of transferase activity	biological_process	0.46676	1	13	17150	56	76974	5	8
GO:0006487	protein N-linked glycosylation	biological_process	0.4979	1	14	17150	61	76974	5	9
GO:0006448	regulation of translational elongation	biological_process	0.49818	1	5	17150	23	76974	5	0
GO:0016872	intramolecular lyase activity	molecular_function	0.5018	1	22	17150	99	76974	5	17
GO:0046429	4-hydroxy-3-methylbut-2-en-1-yl diphosphate synthase activity	molecular_function	0.53266	1	8	17150	34	76974	5	3
GO:0052592	oxidoreductase activity, acting on CH or CH2 groups, with an iron-sulfur protein as acceptor	molecular_function	0.53266	1	8	17150	34	76974	5	3
GO:0019748	secondary metabolic process	biological_process	0.56038	1	19	17150	85	76974	5	14
GO:1901505	carbohydrate derivative transporter activity	molecular_function	0.56726	1	17	17150	79	76974	5	12
GO:0006022	aminoglycan metabolic process	biological_process	0.57913	1	23	17150	108	76974	5	18
GO:0004743	pyruvate kinase activity	molecular_function	0.5918	1	15	17150	67	76974	5	10
GO:0000123	histone acetyltransferase complex	cellular_component	0.59476	1	14	17150	64	76974	5	9
GO:0031248	protein acetyltransferase complex	cellular_component	0.59476	1	14	17150	64	76974	5	9
GO:1902493	acetyltransferase complex	cellular_component	0.59476	1	14	17150	64	76974	5	9
GO:0016972	thiol oxidase activity	molecular_function	0.60995	1	6	17150	28	76974	5	1
GO:0005337	nucleoside transmembrane transporter activity	molecular_function	0.62811	1	13	17150	62	76974	5	8
GO:0006771	riboflavin metabolic process	biological_process	0.63493	1	14	17150	67	76974	5	9
GO:0009231	riboflavin biosynthetic process	biological_process	0.63493	1	14	17150	67	76974	5	9
GO:0042726	flavin-containing compound metabolic process	biological_process	0.63493	1	14	17150	67	76974	5	9
GO:0042727	flavin-containing compound biosynthetic process	biological_process	0.63493	1	14	17150	67	76974	5	9
GO:0070851	growth factor receptor binding	molecular_function	0.63496	1	8	17150	37	76974	5	3
GO:0003729	mRNA binding	molecular_function	0.63528	1	12	17150	57	76974	5	7
GO:0044822	poly(A) RNA binding	molecular_function	0.63528	1	12	17150	57	76974	5	7
GO:0004602	glutathione peroxidase activity	molecular_function	0.63857	1	8	17150	40	76974	5	3
GO:0070603	SWI/SNF superfamily-type complex	cellular_component	0.64292	1	8	17150	39	76974	5	3
GO:0051260	protein homooligomerization	biological_process	0.65841	1	8	17150	38	76974	5	3
GO:0008649	rRNA methyltransferase activity	molecular_function	0.66735	1	7	17150	34	76974	5	2
GO:0050776	regulation of immune response	biological_process	0.68315	1	7	17150	36	76974	5	2
GO:0003714	transcription corepressor activity	molecular_function	0.69321	1	8	17150	40	76974	5	3
GO:0019082	viral protein processing	biological_process	0.70018	1	6	17150	30	76974	5	1
GO:0045261	proton-transporting ATP synthase complex, catalytic core F(1)	cellular_component	0.70341	1	6	17150	31	76974	5	1
GO:0048309	endoplasmic reticulum inheritance	biological_process	0.73562	1	7	17150	36	76974	5	2
GO:0004615	phosphomannomutase activity	molecular_function	0.74679	1	7	17150	37	76974	5	2
GO:0009226	nucleotide-sugar biosynthetic process	biological_process	0.74679	1	7	17150	37	76974	5	2
GO:0009298	GDP-mannose biosynthetic process	biological_process	0.74679	1	7	17150	37	76974	5	2
GO:0019673	GDP-mannose metabolic process	biological_process	0.74679	1	7	17150	37	76974	5	2
GO:0019064	fusion of virus membrane with host plasma membrane	biological_process	0.75811	1	8	17150	42	76974	5	3
GO:0039663	membrane fusion involved in viral entry into host cell	biological_process	0.75811	1	8	17150	42	76974	5	3
GO:0044800	multi-organism membrane fusion	biological_process	0.75811	1	8	17150	42	76974	5	3
GO:0044803	multi-organism membrane organization	biological_process	0.75811	1	8	17150	42	76974	5	3
GO:0071941	nitrogen cycle metabolic process	biological_process	0.76496	1	8	17150	44	76974	5	3
GO:0030915	Smc5-Smc6 complex	cellular_component	0.77494	1	10	17150	52	76974	5	5
GO:0010564	regulation of cell cycle process	biological_process	0.78468	1	18	17150	93	76974	5	13
GO:0048308	organelle inheritance	biological_process	0.7885	1	7	17150	38	76974	5	2
GO:0009225	nucleotide-sugar metabolic process	biological_process	0.79791	1	7	17150	39	76974	5	2
GO:0016458	gene silencing	biological_process	0.82407	1	14	17150	74	76974	5	9
GO:0006542	glutamine biosynthetic process	biological_process	0.83923	1	5	17150	30	76974	5	0
GO:0071826	ribonucleoprotein complex subunit organization	biological_process	0.84275	1	8	17150	47	76974	5	3
GO:0006406	mRNA export from nucleus	biological_process	0.84746	1	10	17150	57	76974	5	5
GO:0071166	ribonucleoprotein complex localization	biological_process	0.84746	1	10	17150	57	76974	5	5
GO:0071426	ribonucleoprotein complex export from nucleus	biological_process	0.84746	1	10	17150	57	76974	5	5
GO:0071427	mRNA-containing ribonucleoprotein complex export from nucleus	biological_process	0.84746	1	10	17150	57	76974	5	5
GO:0030118	clathrin coat	cellular_component	0.84899	1	9	17150	51	76974	5	4
GO:0006405	RNA export from nucleus	biological_process	0.85522	1	11	17150	63	76974	5	6
GO:0051168	nuclear export	biological_process	0.85522	1	11	17150	63	76974	5	6
GO:0000184	nuclear-transcribed mRNA catabolic process, nonsense-mediated decay	biological_process	0.85584	1	8	17150	46	76974	5	3
GO:0071310	cellular response to organic substance	biological_process	0.85652	1	9	17150	53	76974	5	4
GO:0000921	septin ring assembly	biological_process	0.90553	1	12	17150	72	76974	5	7
GO:0005940	septin ring	cellular_component	0.90553	1	12	17150	72	76974	5	7
GO:0031106	septin ring organization	biological_process	0.90553	1	12	17150	72	76974	5	7
GO:0032156	septin cytoskeleton	cellular_component	0.90553	1	12	17150	72	76974	5	7
GO:0032185	septin cytoskeleton organization	biological_process	0.90553	1	12	17150	72	76974	5	7
GO:0016888	endodeoxyribonuclease activity, producing 5'-phosphomonoesters	molecular_function	0.94425	1	8	17150	56	76974	5	3
GO:0008200	ion channel inhibitor activity	molecular_function	0.95025	1	7	17150	51	76974	5	2
GO:0016248	channel inhibitor activity	molecular_function	0.95025	1	7	17150	51	76974	5	2
GO:0043244	regulation of protein complex disassembly	biological_process	0.95162	1	9	17150	64	76974	5	4
GO:0005798	Golgi-associated vesicle	cellular_component	0.95646	1	10	17150	67	76974	5	5
GO:0030660	Golgi-associated vesicle membrane	cellular_component	0.95646	1	10	17150	67	76974	5	5
GO:0033588	Elongator holoenzyme complex	cellular_component	0.97913	1	7	17150	56	76974	5	2
GO:0007600	sensory perception	biological_process	0.98467	1	6	17150	53	76974	5	1
GO:0050877	neurological system process	biological_process	0.98467	1	6	17150	53	76974	5	1
GO:0003008	system process	biological_process	0.99432	1	6	17150	59	76974	5	1
GO:0004813	alanine-tRNA ligase activity	molecular_function	0.99542	1	8	17150	70	76974	5	3
GO:0006419	alanyl-tRNA aminoacylation	biological_process	0.99542	1	8	17150	70	76974	5	3
GO:0005730	nucleolus	cellular_component	0.99785	1	14	17150	118	76974	5	9
GO:0000148	1,3-beta-D-glucan synthase complex	cellular_component	0.99996	1	12	17150	139	76974	5	7
GO:0003843	1,3-beta-D-glucan synthase activity	molecular_function	0.99996	1	12	17150	139	76974	5	7
GO:0006074	(1->3)-beta-D-glucan metabolic process	biological_process	0.99996	1	12	17150	139	76974	5	7
GO:0006075	(1->3)-beta-D-glucan biosynthetic process	biological_process	0.99996	1	12	17150	139	76974	5	7
GO:0008612	peptidyl-lysine modification to peptidyl-hypusine	biological_process	0.00021272	0.013583	7	17150	8	76974	4	3
GO:0019385	methanogenesis, from acetate	biological_process	0.011219	0.27583	12	17150	27	76974	4	8
GO:0019825	oxygen binding	molecular_function	0.028431	0.50764	7	17150	15	76974	4	3
GO:0030291	protein serine/threonine kinase inhibitor activity	molecular_function	0.039278	0.60006	8	17150	19	76974	4	4
GO:0004435	phosphatidylinositol phospholipase C activity	molecular_function	0.039357	0.60006	10	17150	25	76974	4	6
GO:0004629	phospholipase C activity	molecular_function	0.039357	0.60006	10	17150	25	76974	4	6
GO:0000702	oxidized base lesion DNA N-glycosylase activity	molecular_function	0.054042	0.67088	6	17150	13	76974	4	2
GO:0008534	oxidized purine nucleobase lesion DNA N-glycosylase activity	molecular_function	0.054042	0.67088	6	17150	13	76974	4	2
GO:0006471	protein ADP-ribosylation	biological_process	0.057576	0.70045	11	17150	30	76974	4	7
GO:0006824	cobalt ion transport	biological_process	0.078318	0.78086	5	17150	11	76974	4	1
GO:0015087	cobalt ion transmembrane transporter activity	molecular_function	0.078318	0.78086	5	17150	11	76974	4	1
GO:0004860	protein kinase inhibitor activity	molecular_function	0.097075	0.88863	8	17150	23	76974	4	4
GO:0019210	kinase inhibitor activity	molecular_function	0.097075	0.88863	8	17150	23	76974	4	4
GO:0045995	regulation of embryonic development	biological_process	0.12887	1	11	17150	35	76974	4	7
GO:0004620	phospholipase activity	molecular_function	0.14031	1	11	17150	35	76974	4	7
GO:0044450	microtubule organizing center part	cellular_component	0.14452	1	10	17150	31	76974	4	6
GO:0010277	chlorophyllide a oxygenase [overall] activity	molecular_function	0.14778	1	7	17150	20	76974	4	3
GO:0030076	light-harvesting complex	cellular_component	0.15683	1	6	17150	18	76974	4	2
GO:0016477	cell migration	biological_process	0.16938	1	11	17150	37	76974	4	7
GO:0030334	regulation of cell migration	biological_process	0.16938	1	11	17150	37	76974	4	7
GO:0010309	acireductone dioxygenase [iron(II)-requiring] activity	molecular_function	0.17227	1	7	17150	24	76974	4	3
GO:0009095	aromatic amino acid family biosynthetic process, prephenate pathway	biological_process	0.17302	1	15	17150	52	76974	4	11
GO:0005542	folic acid binding	molecular_function	0.19592	1	6	17150	18	76974	4	2
GO:0072341	modified amino acid binding	molecular_function	0.19592	1	6	17150	18	76974	4	2
GO:0005986	sucrose biosynthetic process	biological_process	0.20844	1	6	17150	18	76974	4	2
GO:0050307	sucrose-phosphate phosphatase activity	molecular_function	0.20844	1	6	17150	18	76974	4	2
GO:0070070	proton-transporting V-type ATPase complex assembly	biological_process	0.21194	1	7	17150	24	76974	4	3
GO:0070072	vacuolar proton-transporting V-type ATPase complex assembly	biological_process	0.21194	1	7	17150	24	76974	4	3
GO:0034227	tRNA thio-modification	biological_process	0.21324	1	7	17150	23	76974	4	3
GO:0004549	tRNA-specific ribonuclease activity	molecular_function	0.21752	1	10	17150	36	76974	4	6
GO:0051270	regulation of cellular component movement	biological_process	0.22264	1	11	17150	39	76974	4	7
GO:2000145	regulation of cell motility	biological_process	0.22264	1	11	17150	39	76974	4	7
GO:0004150	dihydroneopterin aldolase activity	molecular_function	0.23151	1	4	17150	12	76974	4	0
GO:0045300	acyl-[acyl-carrier-protein] desaturase activity	molecular_function	0.23272	1	7	17150	23	76974	4	3
GO:0035257	nuclear hormone receptor binding	molecular_function	0.24732	1	5	17150	15	76974	4	1
GO:0051427	hormone receptor binding	molecular_function	0.24732	1	5	17150	15	76974	4	1
GO:0004748	ribonucleoside-diphosphate reductase activity, thioredoxin disulfide as acceptor	molecular_function	0.2488	1	5	17150	15	76974	4	1
GO:0061731	ribonucleoside-diphosphate reductase activity	molecular_function	0.2488	1	5	17150	15	76974	4	1
GO:0010942	positive regulation of cell death	biological_process	0.26263	1	9	17150	31	76974	4	5
GO:0043065	positive regulation of apoptotic process	biological_process	0.26263	1	9	17150	31	76974	4	5
GO:0043068	positive regulation of programmed cell death	biological_process	0.26263	1	9	17150	31	76974	4	5
GO:0004656	procollagen-proline 4-dioxygenase activity	molecular_function	0.27344	1	5	17150	16	76974	4	1
GO:0019798	procollagen-proline dioxygenase activity	molecular_function	0.27344	1	5	17150	16	76974	4	1
GO:0031543	peptidyl-proline dioxygenase activity	molecular_function	0.27344	1	5	17150	16	76974	4	1
GO:0031545	peptidyl-proline 4-dioxygenase activity	molecular_function	0.27344	1	5	17150	16	76974	4	1
GO:0004018	N6-(1,2-dicarboxyethyl)AMP AMP-lyase (fumarate-forming) activity	molecular_function	0.28691	1	4	17150	12	76974	4	0
GO:0008250	oligosaccharyltransferase complex	cellular_component	0.30411	1	9	17150	33	76974	4	5
GO:0010921	regulation of phosphatase activity	biological_process	0.3088	1	4	17150	13	76974	4	0
GO:2000026	regulation of multicellular organismal development	biological_process	0.32121	1	12	17150	47	76974	4	8
GO:0016842	amidine-lyase activity	molecular_function	0.33445	1	4	17150	13	76974	4	0
GO:0009086	methionine biosynthetic process	biological_process	0.3345	1	11	17150	41	76974	4	7
GO:0005942	phosphatidylinositol 3-kinase complex	cellular_component	0.33702	1	9	17150	34	76974	4	5
GO:0005944	phosphatidylinositol 3-kinase complex, class IB	cellular_component	0.33702	1	9	17150	34	76974	4	5
GO:0035014	phosphatidylinositol 3-kinase regulator activity	molecular_function	0.33702	1	9	17150	34	76974	4	5
GO:0046935	1-phosphatidylinositol-3-kinase regulator activity	molecular_function	0.33702	1	9	17150	34	76974	4	5
GO:0097651	phosphatidylinositol 3-kinase complex, class I	cellular_component	0.33702	1	9	17150	34	76974	4	5
GO:0030474	spindle pole body duplication	biological_process	0.34195	1	14	17150	54	76974	4	10
GO:0051300	spindle pole body organization	biological_process	0.34195	1	14	17150	54	76974	4	10
GO:0030269	tetrahydromethanopterin S-methyltransferase activity	molecular_function	0.34237	1	7	17150	27	76974	4	3
GO:0042086	5-methyl-5,6,7,8-tetrahydromethanopterin-dependent methyltransferase activity	molecular_function	0.34237	1	7	17150	27	76974	4	3
GO:0040012	regulation of locomotion	biological_process	0.34454	1	11	17150	43	76974	4	7
GO:0009991	response to extracellular stimulus	biological_process	0.34883	1	13	17150	55	76974	4	9
GO:0031668	cellular response to extracellular stimulus	biological_process	0.34883	1	13	17150	55	76974	4	9
GO:0071496	cellular response to external stimulus	biological_process	0.34883	1	13	17150	55	76974	4	9
GO:0016929	SUMO-specific protease activity	molecular_function	0.38201	1	10	17150	39	76974	4	6
GO:0032183	SUMO binding	molecular_function	0.38201	1	10	17150	39	76974	4	6
GO:0070122	isopeptidase activity	molecular_function	0.38201	1	10	17150	39	76974	4	6
GO:0070138	ubiquitin-like protein-specific isopeptidase activity	molecular_function	0.38201	1	10	17150	39	76974	4	6
GO:0070140	SUMO-specific isopeptidase activity	molecular_function	0.38201	1	10	17150	39	76974	4	6
GO:0015934	large ribosomal subunit	cellular_component	0.38425	1	4	17150	16	76974	4	0
GO:0015159	polysaccharide transmembrane transporter activity	molecular_function	0.39547	1	6	17150	25	76974	4	2
GO:0003989	acetyl-CoA carboxylase activity	molecular_function	0.40765	1	12	17150	48	76974	4	8
GO:0016421	CoA carboxylase activity	molecular_function	0.40765	1	12	17150	48	76974	4	8
GO:0016885	ligase activity, forming carbon-carbon bonds	molecular_function	0.40765	1	12	17150	48	76974	4	8
GO:0006303	double-strand break repair via nonhomologous end joining	biological_process	0.41844	1	8	17150	32	76974	4	4
GO:0007094	mitotic spindle assembly checkpoint	biological_process	0.4245	1	12	17150	50	76974	4	8
GO:0009895	negative regulation of catabolic process	biological_process	0.4245	1	12	17150	50	76974	4	8
GO:0031330	negative regulation of cellular catabolic process	biological_process	0.4245	1	12	17150	50	76974	4	8
GO:0031396	regulation of protein ubiquitination	biological_process	0.4245	1	12	17150	50	76974	4	8
GO:0031397	negative regulation of protein ubiquitination	biological_process	0.4245	1	12	17150	50	76974	4	8
GO:0031577	spindle checkpoint	biological_process	0.4245	1	12	17150	50	76974	4	8
GO:0032435	negative regulation of proteasomal ubiquitin-dependent protein catabolic process	biological_process	0.4245	1	12	17150	50	76974	4	8
GO:0033046	negative regulation of sister chromatid segregation	biological_process	0.4245	1	12	17150	50	76974	4	8
GO:0033048	negative regulation of mitotic sister chromatid segregation	biological_process	0.4245	1	12	17150	50	76974	4	8
GO:0042177	negative regulation of protein catabolic process	biological_process	0.4245	1	12	17150	50	76974	4	8
GO:0045839	negative regulation of mitotic nuclear division	biological_process	0.4245	1	12	17150	50	76974	4	8
GO:0045841	negative regulation of mitotic metaphase/anaphase transition	biological_process	0.4245	1	12	17150	50	76974	4	8
GO:0051340	regulation of ligase activity	biological_process	0.4245	1	12	17150	50	76974	4	8
GO:0051352	negative regulation of ligase activity	biological_process	0.4245	1	12	17150	50	76974	4	8
GO:0051436	negative regulation of ubiquitin-protein ligase activity involved in mitotic cell cycle	biological_process	0.4245	1	12	17150	50	76974	4	8
GO:0051438	regulation of ubiquitin-protein transferase activity	biological_process	0.4245	1	12	17150	50	76974	4	8
GO:0051439	regulation of ubiquitin-protein ligase activity involved in mitotic cell cycle	biological_process	0.4245	1	12	17150	50	76974	4	8
GO:0051444	negative regulation of ubiquitin-protein transferase activity	biological_process	0.4245	1	12	17150	50	76974	4	8
GO:0051784	negative regulation of nuclear division	biological_process	0.4245	1	12	17150	50	76974	4	8
GO:0051985	negative regulation of chromosome segregation	biological_process	0.4245	1	12	17150	50	76974	4	8
GO:0071173	spindle assembly checkpoint	biological_process	0.4245	1	12	17150	50	76974	4	8
GO:0071174	mitotic spindle checkpoint	biological_process	0.4245	1	12	17150	50	76974	4	8
[truncated: 1,787 more rows]
