# Supplementary material for: <span aria-describedby="tippy-17">Transcriptomic and Metabolomic Profiling Provides Insights into Flavonoids Biosynthesis and Flower Coloring in <em>Loropetalum chinense</em> and <em>Loropetalum chinense</em> var. <em>rubrum</em>
Source: Preprints.org preprint supplement (doi:10.20944/preprints202304.0456.v1), 2023-04-18
Supplement: Supplementary file 21 [file supplementary table S27.xlsx]

## Sheet: Table S27 
	Supplementary table S27 The GO enrichment analysis of DETs between XNFJ VS XNXY group
GO_accession	Description	Term_type	Over_represented_pValue	Corrected_pValue	DEG_item	DEG_list	Bg_item	Bg_list	up	Down
GO:0005488	binding	molecular_function	1.63e-14	1.53e-11	9617	15527	45204	76974	5995	0
GO:0008152	metabolic process	biological_process	0.047457	0.63674	7776	15527	38138	76974	4825	0
GO:0003824	catalytic activity	molecular_function	2.85e-05	0.002734	7750	15527	37140	76974	4807	0
GO:0009987	cellular process	biological_process	0.28394	1	7195	15527	35601	76974	4494	0
GO:0071704	organic substance metabolic process	biological_process	0.054414	0.70201	6151	15527	30055	76974	3830	0
GO:0044238	primary metabolic process	biological_process	0.062198	0.76017	5910	15527	28867	76974	3695	0
GO:0044699	single-organism process	biological_process	0.37735	1	5430	15527	26880	76974	3409	0
GO:0044237	cellular metabolic process	biological_process	0.045768	0.63278	5319	15527	25988	76974	3296	0
GO:0097159	organic cyclic compound binding	molecular_function	3.62e-05	0.003114	5335	15527	25105	76974	3291	0
GO:1901363	heterocyclic compound binding	molecular_function	3.62e-05	0.003114	5335	15527	25105	76974	3291	0
GO:0043167	ion binding	molecular_function	2.57e-14	2.01e-11	5225	15527	23628	76974	3217	0
GO:0043170	macromolecule metabolic process	biological_process	0.38304	1	4510	15527	22305	76974	2791	0
GO:0005515	protein binding	molecular_function	1e-16	2.36e-13	4252	15527	18804	76974	2750	0
GO:0044260	cellular macromolecule metabolic process	biological_process	0.26284	1	4074	15527	20056	76974	2530	0
GO:0044763	single-organism cellular process	biological_process	0.39758	1	3803	15527	18770	76974	2395	0
GO:0036094	small molecule binding	molecular_function	3.57e-09	1.2e-06	3422	15527	15382	76974	2092	0
GO:0043168	anion binding	molecular_function	1.24e-09	4.47e-07	3316	15527	14833	76974	2055	0
GO:0000166	nucleotide binding	molecular_function	5.74e-09	1.43e-06	3348	15527	15049	76974	2051	0
GO:1901265	nucleoside phosphate binding	molecular_function	5.74e-09	1.43e-06	3348	15527	15049	76974	2051	0
GO:0016740	transferase activity	molecular_function	0.003395	0.10931	3104	15527	14628	76974	1936	0
GO:0006807	nitrogen compound metabolic process	biological_process	0.48836	1	3133	15527	15693	76974	1911	0
GO:0044710	single-organism metabolic process	biological_process	0.046597	0.63608	3041	15527	14730	76974	1883	0
GO:0097367	carbohydrate derivative binding	molecular_function	1.77e-06	0.000244	2930	15527	13219	76974	1812	0
GO:0017076	purine nucleotide binding	molecular_function	1.32e-06	0.000189	2910	15527	13106	76974	1809	0
GO:0032553	ribonucleotide binding	molecular_function	1.23e-06	0.000181	2908	15527	13096	76974	1806	0
GO:0032555	purine ribonucleotide binding	molecular_function	6.21e-07	0.000101	2892	15527	12997	76974	1797	0
GO:0001882	nucleoside binding	molecular_function	5.53e-07	0.000101	2892	15527	12996	76974	1796	0
GO:0001883	purine nucleoside binding	molecular_function	6.16e-07	0.000101	2891	15527	12992	76974	1796	0
GO:0032549	ribonucleoside binding	molecular_function	6.16e-07	0.000101	2891	15527	12992	76974	1796	0
GO:0032550	purine ribonucleoside binding	molecular_function	6.16e-07	0.000101	2891	15527	12992	76974	1796	0
GO:0034641	cellular nitrogen compound metabolic process	biological_process	0.72276	1	2881	15527	14584	76974	1774	0
GO:0016020	membrane	cellular_component	1	1	2712	15527	14698	76974	1737	0
GO:0009058	biosynthetic process	biological_process	0.19324	1	2773	15527	13737	76974	1723	0
GO:0030554	adenyl nucleotide binding	molecular_function	4.95e-09	1.43e-06	2750	15527	12188	76974	1707	0
GO:0032559	adenyl ribonucleotide binding	molecular_function	5.77e-09	1.43e-06	2734	15527	12116	76974	1696	0
GO:1901360	organic cyclic compound metabolic process	biological_process	0.060268	0.74479	2742	15527	13346	76974	1696	0
GO:0005623	cell	cellular_component	0.95439	1	2595	15527	13510	76974	1657	0
GO:0044464	cell part	cellular_component	0.95439	1	2595	15527	13510	76974	1657	0
GO:0016787	hydrolase activity	molecular_function	0.51431	1	2613	15527	12931	76974	1643	0
GO:0035639	purine ribonucleoside triphosphate binding	molecular_function	0.017052	0.35909	2619	15527	12238	76974	1627	0
GO:1901576	organic substance biosynthetic process	biological_process	0.36844	1	2606	15527	13027	76974	1616	0
GO:0006725	cellular aromatic compound metabolic process	biological_process	0.5749	1	2576	15527	12874	76974	1602	0
GO:0046483	heterocycle metabolic process	biological_process	0.56471	1	2569	15527	12836	76974	1591	0
GO:0019538	protein metabolic process	biological_process	0.17815	1	2558	15527	12439	76974	1566	0
GO:0044249	cellular biosynthetic process	biological_process	0.77602	1	2453	15527	12484	76974	1525	0
GO:0005524	ATP binding	molecular_function	0.006836	0.19714	2446	15527	11323	76974	1514	0
GO:0005622	intracellular	cellular_component	0.91625	1	2390	15527	12395	76974	1514	0
GO:0044424	intracellular part	cellular_component	0.88436	1	2316	15527	11984	76974	1467	0
GO:0006139	nucleobase-containing compound metabolic process	biological_process	0.77777	1	2364	15527	11932	76974	1458	0
GO:0003676	nucleic acid binding	molecular_function	0.47353	1	2183	15527	10810	76974	1360	0
GO:0090304	nucleic acid metabolic process	biological_process	0.62608	1	2118	15527	10608	76974	1307	0
GO:0044267	cellular protein metabolic process	biological_process	0.055922	0.71361	2117	15527	10134	76974	1305	0
GO:0043169	cation binding	molecular_function	2.22e-05	0.002367	2103	15527	9614	76974	1290	0
GO:0046872	metal ion binding	molecular_function	3.78e-05	0.003114	2075	15527	9505	76974	1276	0
GO:0065007	biological regulation	biological_process	0.28941	1	1937	15527	9595	76974	1267	0
GO:0051179	localization	biological_process	0.99883	1	1990	15527	10461	76974	1243	0
GO:0050789	regulation of biological process	biological_process	0.1236	1	1875	15527	9149	76974	1230	0
GO:0051234	establishment of localization	biological_process	0.99868	1	1940	15527	10203	76974	1218	0
GO:0006810	transport	biological_process	0.99874	1	1931	15527	10160	76974	1211	0
GO:0050794	regulation of cellular process	biological_process	0.082453	0.8983	1815	15527	8795	76974	1193	0
GO:0010467	gene expression	biological_process	0.77115	1	1946	15527	9927	76974	1183	0
GO:0043226	organelle	cellular_component	0.75799	1	1818	15527	9327	76974	1148	0
GO:0043229	intracellular organelle	cellular_component	0.78849	1	1784	15527	9177	76974	1128	656
GO:0016772	transferase activity, transferring phosphorus-containing groups	molecular_function	0.25002	1	1800	15527	8634	76974	1109	691
GO:0009059	macromolecule biosynthetic process	biological_process	0.9978	1	1776	15527	9486	76974	1094	682
GO:0034645	cellular macromolecule biosynthetic process	biological_process	0.99835	1	1753	15527	9387	76974	1081	672
GO:0044271	cellular nitrogen compound biosynthetic process	biological_process	0.98519	1	1722	15527	9067	76974	1061	661
GO:0043412	macromolecule modification	biological_process	0.035448	0.54222	1688	15527	7909	76974	1054	634
GO:0044425	membrane part	cellular_component	1	1	1620	15527	9233	76974	1034	586
GO:0016070	RNA metabolic process	biological_process	0.70542	1	1621	15527	8141	76974	992	629
GO:1901362	organic cyclic compound biosynthetic process	biological_process	0.33528	1	1525	15527	7560	76974	963	562
GO:0006464	cellular protein modification process	biological_process	0.029495	0.47858	1513	15527	7035	76974	945	568
GO:0036211	protein modification process	biological_process	0.029495	0.47858	1513	15527	7035	76974	945	568
GO:0050896	response to stimulus	biological_process	0.00449	0.14058	1425	15527	6765	76974	938	487
GO:0055114	oxidation-reduction process	biological_process	0.008586	0.22653	1528	15527	7221	76974	937	591
GO:0043227	membrane-bounded organelle	cellular_component	0.83843	1	1415	15527	7267	76974	918	497
GO:0043231	intracellular membrane-bounded organelle	cellular_component	0.84015	1	1414	15527	7263	76974	917	497
GO:0006796	phosphate-containing compound metabolic process	biological_process	0.31484	1	1478	15527	7094	76974	914	564
GO:0006793	phosphorus metabolic process	biological_process	0.31821	1	1478	15527	7096	76974	914	564
GO:0016301	kinase activity	molecular_function	0.093176	0.96312	1441	15527	6739	76974	912	529
GO:1902578	single-organism localization	biological_process	0.99565	1	1438	15527	7563	76974	906	532
GO:0032991	macromolecular complex	cellular_component	0.78843	1	1427	15527	7430	76974	903	524
GO:0016491	oxidoreductase activity	molecular_function	0.002187	0.083248	1470	15527	6885	76974	896	574
GO:0044765	single-organism transport	biological_process	0.99529	1	1419	15527	7461	76974	893	526
GO:0019438	aromatic compound biosynthetic process	biological_process	0.94755	1	1348	15527	6998	76974	866	482
GO:0018130	heterocycle biosynthetic process	biological_process	0.96128	1	1356	15527	7062	76974	864	492
GO:0016773	phosphotransferase activity, alcohol group as acceptor	molecular_function	0.096031	0.96327	1349	15527	6303	76974	841	508
GO:0046914	transition metal ion binding	molecular_function	0.10508	1	1273	15527	6057	76974	800	473
GO:0003677	DNA binding	molecular_function	0.85695	1	1213	15527	6205	76974	775	438
GO:0031224	intrinsic component of membrane	cellular_component	1	1	1210	15527	7019	76974	772	438
GO:0016021	integral component of membrane	cellular_component	1	1	1201	15527	6991	76974	763	438
GO:0034654	nucleobase-containing compound biosynthetic process	biological_process	0.99524	1	1164	15527	6217	76974	743	421
GO:0004672	protein kinase activity	molecular_function	0.078934	0.8763	1183	15527	5485	76974	739	444
GO:0016310	phosphorylation	biological_process	0.067092	0.78963	1185	15527	5495	76974	737	448
GO:0043234	protein complex	cellular_component	0.92641	1	1140	15527	5977	76974	732	408
GO:0051716	cellular response to stimulus	biological_process	0.002411	0.086138	1051	15527	4862	76974	704	347
GO:0006468	protein phosphorylation	biological_process	0.07322	0.84069	1104	15527	5102	76974	695	409
GO:1901564	organonitrogen compound metabolic process	biological_process	0.26496	1	1169	15527	5813	76974	683	486
GO:0019222	regulation of metabolic process	biological_process	0.71255	1	1049	15527	5278	76974	667	382
GO:0032774	RNA biosynthetic process	biological_process	0.98154	1	1049	15527	5539	76974	665	384
GO:0005737	cytoplasm	cellular_component	0.86345	1	1076	15527	5704	76974	658	418
GO:0006351	transcription, DNA-templated	biological_process	0.98854	1	1025	15527	5446	76974	653	372
GO:0097659	nucleic acid-templated transcription	biological_process	0.98854	1	1025	15527	5446	76974	653	372
GO:0005634	nucleus	cellular_component	0.72964	1	984	15527	4996	76974	648	336
GO:0031323	regulation of cellular metabolic process	biological_process	0.68073	1	997	15527	4990	76974	634	363
GO:0060255	regulation of macromolecule metabolic process	biological_process	0.69127	1	988	15527	4965	76974	630	358
GO:0080090	regulation of primary metabolic process	biological_process	0.70584	1	960	15527	4816	76974	613	347
GO:0010468	regulation of gene expression	biological_process	0.73514	1	950	15527	4792	76974	606	344
GO:0005215	transporter activity	molecular_function	0.99982	1	944	15527	5219	76974	600	344
GO:0051171	regulation of nitrogen compound metabolic process	biological_process	0.62139	1	931	15527	4640	76974	596	335
GO:0016817	hydrolase activity, acting on acid anhydrides	molecular_function	0.010021	0.25166	937	15527	4281	76974	590	347
GO:0009889	regulation of biosynthetic process	biological_process	0.67998	1	923	15527	4621	76974	589	334
GO:0010556	regulation of macromolecule biosynthetic process	biological_process	0.68786	1	922	15527	4619	76974	589	333
GO:0031326	regulation of cellular biosynthetic process	biological_process	0.68786	1	922	15527	4619	76974	589	333
GO:2000112	regulation of cellular macromolecule biosynthetic process	biological_process	0.72899	1	911	15527	4581	76974	585	326
GO:0007154	cell communication	biological_process	0.001372	0.058554	838	15527	3808	76974	576	262
GO:0044711	single-organism biosynthetic process	biological_process	3.13e-05	0.002942	923	15527	4096	76974	572	351
GO:0008270	zinc ion binding	molecular_function	0.4248	1	886	15527	4305	76974	569	317
GO:0044422	organelle part	cellular_component	0.88078	1	916	15527	4767	76974	569	347
GO:0044446	intracellular organelle part	cellular_component	0.90899	1	906	15527	4736	76974	562	344
GO:0019219	regulation of nucleobase-containing compound metabolic process	biological_process	0.51366	1	864	15527	4282	76974	560	304
GO:0016818	hydrolase activity, acting on acid anhydrides, in phosphorus-containing anhydrides	molecular_function	0.018024	0.37252	880	15527	4030	76974	557	323
GO:0051252	regulation of RNA metabolic process	biological_process	0.62059	1	850	15527	4247	76974	551	299
GO:2001141	regulation of RNA biosynthetic process	biological_process	0.62059	1	850	15527	4247	76974	551	299
GO:0044281	small molecule metabolic process	biological_process	0.090463	0.94613	909	15527	4319	76974	548	361
GO:0006355	regulation of transcription, DNA-templated	biological_process	0.66682	1	839	15527	4209	76974	547	292
GO:1903506	regulation of nucleic acid-templated transcription	biological_process	0.66682	1	839	15527	4209	76974	547	292
GO:0016462	pyrophosphatase activity	molecular_function	0.014653	0.33566	854	15527	3892	76974	544	310
GO:0017111	nucleoside-triphosphatase activity	molecular_function	0.015937	0.34489	822	15527	3744	76974	526	296
GO:0044444	cytoplasmic part	cellular_component	0.63958	1	850	15527	4434	76974	524	326
GO:1901566	organonitrogen compound biosynthetic process	biological_process	0.26249	1	863	15527	4300	76974	513	350
GO:0023052	signaling	biological_process	0.001147	0.051794	747	15527	3381	76974	511	236
GO:0044700	single organism signaling	biological_process	0.001242	0.054014	746	15527	3379	76974	510	236
GO:0007165	signal transduction	biological_process	0.000653	0.035004	745	15527	3354	76974	509	236
GO:0071840	cellular component organization or biogenesis	biological_process	0.87831	1	817	15527	4217	76974	506	311
GO:0055085	transmembrane transport	biological_process	0.99198	1	826	15527	4369	76974	502	324
GO:0005975	carbohydrate metabolic process	biological_process	0.99034	1	754	15527	3991	76974	496	258
GO:0022857	transmembrane transporter activity	molecular_function	0.99963	1	772	15527	4273	76974	491	281
GO:0016043	cellular component organization	biological_process	0.98577	1	720	15527	3848	76974	443	277
GO:0006259	DNA metabolic process	biological_process	0.48889	1	664	15527	3316	76974	423	241
GO:0043531	ADP binding	molecular_function	1.66e-44	7.79e-41	638	15527	1831	76974	417	221
GO:0006082	organic acid metabolic process	biological_process	0.000488	0.026961	678	15527	2963	76974	398	280
GO:0043436	oxoacid metabolic process	biological_process	0.000427	0.024436	677	15527	2954	76974	397	280
GO:0006811	ion transport	biological_process	0.99456	1	629	15527	3449	76974	396	233
GO:0071702	organic substance transport	biological_process	0.99967	1	641	15527	3599	76974	396	245
GO:0019752	carboxylic acid metabolic process	biological_process	0.000435	0.024584	666	15527	2903	76974	395	271
GO:0016788	hydrolase activity, acting on ester bonds	molecular_function	0.001604	0.066079	588	15527	2614	76974	391	197
GO:0048037	cofactor binding	molecular_function	5.76e-09	1.43e-06	672	15527	2751	76974	388	284
GO:0006950	response to stress	biological_process	0.067956	0.79781	593	15527	2838	76974	383	210
GO:0006629	lipid metabolic process	biological_process	1.02e-11	4.75e-09	639	15527	2512	76974	382	257
GO:0051641	cellular localization	biological_process	0.88392	1	601	15527	3091	76974	375	226
GO:0033036	macromolecule localization	biological_process	0.99501	1	592	15527	3238	76974	368	224
GO:0022892	substrate-specific transporter activity	molecular_function	0.99973	1	551	15527	3166	76974	363	188
GO:0051649	establishment of localization in cell	biological_process	0.88864	1	570	15527	2936	76974	355	215
GO:0003723	RNA binding	molecular_function	0.28537	1	572	15527	2765	76974	351	221
GO:0006508	proteolysis	biological_process	0.95483	1	553	15527	2926	76974	334	219
GO:0022891	substrate-specific transmembrane transporter activity	molecular_function	0.99942	1	500	15527	2859	76974	333	167
GO:0043228	non-membrane-bounded organelle	cellular_component	0.25693	1	564	15527	2836	76974	331	233
GO:0008104	protein localization	biological_process	0.97816	1	537	15527	2877	76974	331	206
GO:0019001	guanyl nucleotide binding	molecular_function	0.10252	0.99517	492	15527	2293	76974	329	163
GO:0032561	guanyl ribonucleotide binding	molecular_function	0.055021	0.70403	490	15527	2253	76974	328	162
GO:0016887	ATPase activity	molecular_function	0.12492	1	521	15527	2414	76974	328	193
GO:0005525	GTP binding	molecular_function	0.059273	0.74029	488	15527	2247	76974	327	161
GO:0043232	intracellular non-membrane-bounded organelle	cellular_component	0.30867	1	549	15527	2777	76974	321	228
GO:0045184	establishment of protein localization	biological_process	0.97943	1	515	15527	2766	76974	318	197
GO:0050662	coenzyme binding	molecular_function	2.09e-08	4.66e-06	554	15527	2249	76974	315	239
GO:0015075	ion transmembrane transporter activity	molecular_function	0.99959	1	476	15527	2732	76974	313	163
GO:0015031	protein transport	biological_process	0.9811	1	506	15527	2723	76974	311	195
GO:0046907	intracellular transport	biological_process	0.97216	1	499	15527	2650	76974	308	191
GO:0008233	peptidase activity	molecular_function	0.99994	1	512	15527	2992	76974	307	205
GO:0009056	catabolic process	biological_process	0.65577	1	465	15527	2359	76974	297	168
GO:0006812	cation transport	biological_process	0.85593	1	469	15527	2470	76974	296	173
GO:0070011	peptidase activity, acting on L-amino acid peptides	molecular_function	0.99922	1	487	15527	2752	76974	292	195
GO:0098796	membrane protein complex	cellular_component	0.97625	1	440	15527	2439	76974	287	153
GO:0043603	cellular amide metabolic process	biological_process	0.64433	1	489	15527	2552	76974	283	206
GO:0051704	multi-organism process	biological_process	0.9482	1	431	15527	2339	76974	278	153
GO:0016757	transferase activity, transferring glycosyl groups	molecular_function	0.16314	1	436	15527	2057	76974	277	159
GO:0043604	amide biosynthetic process	biological_process	0.47784	1	474	15527	2431	76974	273	201
GO:0034613	cellular protein localization	biological_process	0.92488	1	440	15527	2293	76974	272	168
GO:0070727	cellular macromolecule localization	biological_process	0.92488	1	440	15527	2293	76974	272	168
GO:0006396	RNA processing	biological_process	0.009134	0.23793	468	15527	2084	76974	269	199
GO:0003924	GTPase activity	molecular_function	0.000157	0.010823	395	15527	1638	76974	265	130
GO:0006518	peptide metabolic process	biological_process	0.5497	1	447	15527	2318	76974	252	195
GO:0006886	intracellular protein transport	biological_process	0.92935	1	409	15527	2137	76974	252	157
GO:0016798	hydrolase activity, acting on glycosyl bonds	molecular_function	0.77003	1	377	15527	1916	76974	249	128
GO:0043043	peptide biosynthetic process	biological_process	0.44192	1	439	15527	2252	76974	248	191
GO:0006412	translation	biological_process	0.35958	1	437	15527	2223	76974	247	190
GO:0034660	ncRNA metabolic process	biological_process	0.001038	0.047311	437	15527	1869	76974	246	191
GO:1902494	catalytic complex	cellular_component	0.66378	1	369	15527	1915	76974	240	129
GO:0004553	hydrolase activity, hydrolyzing O-glycosyl compounds	molecular_function	0.82101	1	359	15527	1841	76974	239	120
GO:0044428	nuclear part	cellular_component	0.94206	1	367	15527	1993	76974	238	129
GO:0006520	cellular amino acid metabolic process	biological_process	0.038758	0.5635	388	15527	1748	76974	234	154
GO:0006996	organelle organization	biological_process	0.99802	1	386	15527	2182	76974	234	152
GO:0008324	cation transmembrane transporter activity	molecular_function	0.99121	1	351	15527	1991	76974	233	118
GO:0044085	cellular component biogenesis	biological_process	0.36916	1	386	15527	1894	76974	228	158
GO:0044723	single-organism carbohydrate metabolic process	biological_process	0.88021	1	364	15527	1896	76974	227	137
GO:0016758	transferase activity, transferring hexosyl groups	molecular_function	0.085331	0.91907	347	15527	1604	76974	223	124
GO:0044283	small molecule biosynthetic process	biological_process	5.92e-05	0.004554	357	15527	1460	76974	222	135
GO:0016614	oxidoreductase activity, acting on CH-OH group of donors	molecular_function	1.19e-08	2.8e-06	372	15527	1429	76974	221	151
GO:1901135	carbohydrate derivative metabolic process	biological_process	0.95093	1	369	15527	2000	76974	221	148
GO:0016192	vesicle-mediated transport	biological_process	0.26273	1	368	15527	1729	76974	219	149
GO:1901575	organic substance catabolic process	biological_process	0.19274	1	335	15527	1606	76974	216	119
GO:0008610	lipid biosynthetic process	biological_process	1.11e-11	4.75e-09	372	15527	1357	76974	213	159
GO:0003700	transcription factor activity, sequence-specific DNA binding	molecular_function	0.88032	1	301	15527	1587	76974	213	88
GO:0001071	nucleic acid binding transcription factor activity	molecular_function	0.8966	1	301	15527	1594	76974	213	88
GO:0044248	cellular catabolic process	biological_process	0.98418	1	328	15527	1820	76974	213	115
GO:0022890	inorganic cation transmembrane transporter activity	molecular_function	0.97786	1	320	15527	1794	76974	209	111
GO:0033554	cellular response to stress	biological_process	0.28899	1	323	15527	1563	76974	207	116
GO:0016616	oxidoreductase activity, acting on the CH-OH group of donors, NAD or NADP as acceptor	molecular_function	7.49e-10	2.93e-07	348	15527	1295	76974	205	143
GO:0006399	tRNA metabolic process	biological_process	0.01196	0.29251	368	15527	1611	76974	203	165
GO:0006974	cellular response to DNA damage stimulus	biological_process	0.12874	1	313	15527	1460	76974	203	110
GO:0044255	cellular lipid metabolic process	biological_process	0.000557	0.030425	347	15527	1461	76974	202	145
GO:0016741	transferase activity, transferring one-carbon groups	molecular_function	0.3215	1	316	15527	1544	76974	202	114
GO:0008168	methyltransferase activity	molecular_function	0.12307	1	313	15527	1477	76974	200	113
GO:0005198	structural molecule activity	molecular_function	0.8203	1	349	15527	1920	76974	200	149
GO:0005509	calcium ion binding	molecular_function	6.67e-08	1.42e-05	283	15527	1082	76974	194	89
GO:0005576	extracellular region	cellular_component	0.2334	1	286	15527	1390	76974	194	92
GO:0016053	organic acid biosynthetic process	biological_process	5.99e-06	0.000721	299	15527	1165	76974	192	107
GO:0046394	carboxylic acid biosynthetic process	biological_process	5.99e-06	0.000721	299	15527	1165	76974	192	107
GO:0006281	DNA repair	biological_process	0.24439	1	293	15527	1392	76974	190	103
GO:0019637	organophosphate metabolic process	biological_process	0.97426	1	321	15527	1762	76974	188	133
GO:0034470	ncRNA processing	biological_process	4.82e-05	0.003775	323	15527	1302	76974	185	138
GO:0016829	lyase activity	molecular_function	0.015726	0.3419	323	15527	1444	76974	184	139
GO:0030529	ribonucleoprotein complex	cellular_component	0.18595	1	306	15527	1564	76974	182	124
GO:0004842	ubiquitin-protein transferase activity	molecular_function	1.22e-06	0.000181	253	15527	949	76974	180	73
GO:0019787	ubiquitin-like protein transferase activity	molecular_function	1.22e-06	0.000181	253	15527	949	76974	180	73
GO:0012505	endomembrane system	cellular_component	0.94797	1	279	15527	1520	76974	178	101
GO:0030001	metal ion transport	biological_process	0.25895	1	275	15527	1352	76974	177	98
GO:0031090	organelle membrane	cellular_component	0.97474	1	290	15527	1629	76974	176	114
GO:0015672	monovalent inorganic cation transport	biological_process	0.92552	1	278	15527	1501	76974	175	103
GO:0005506	iron ion binding	molecular_function	0.021612	0.42112	277	15527	1224	76974	170	107
GO:0071944	cell periphery	cellular_component	0.69961	1	241	15527	1257	76974	170	71
GO:0043933	macromolecular complex subunit organization	biological_process	0.80742	1	296	15527	1542	76974	169	127
GO:1902582	single-organism intracellular transport	biological_process	0.90828	1	259	15527	1385	76974	168	91
GO:0004175	endopeptidase activity	molecular_function	0.99997	1	263	15527	1639	76974	167	96
GO:0004386	helicase activity	molecular_function	0.18933	1	256	15527	1175	76974	163	93
GO:0022607	cellular component assembly	biological_process	0.87879	1	284	15527	1502	76974	162	122
GO:0035556	intracellular signal transduction	biological_process	0.77163	1	254	15527	1316	76974	161	93
GO:0032787	monocarboxylic acid metabolic process	biological_process	0.000214	0.014356	267	15527	1073	76974	157	110
GO:0044877	macromolecular complex binding	molecular_function	0.84803	1	225	15527	1177	76974	157	68
GO:0051186	cofactor metabolic process	biological_process	0.058058	0.73094	263	15527	1190	76974	156	107
GO:1990234	transferase complex	cellular_component	0.89967	1	241	15527	1309	76974	154	87
GO:0006310	DNA recombination	biological_process	0.063539	0.76902	221	15527	985	76974	151	70
GO:0016779	nucleotidyltransferase activity	molecular_function	0.96691	1	257	15527	1436	76974	146	111
GO:0008033	tRNA processing	biological_process	0.001158	0.051797	254	15527	1044	76974	142	112
GO:0016705	oxidoreductase activity, acting on paired donors, with incorporation or reduction of molecular oxygen	molecular_function	0.1124	1	233	15527	1064	76974	142	91
GO:0098588	bounding membrane of organelle	cellular_component	0.98643	1	227	15527	1304	76974	139	88
GO:0042578	phosphoric ester hydrolase activity	molecular_function	0.021584	0.42112	209	15527	895	76974	138	71
GO:0046906	tetrapyrrole binding	molecular_function	0.72044	1	228	15527	1170	76974	138	90
GO:0032501	multicellular organismal process	biological_process	0.73124	1	208	15527	1065	76974	138	70
GO:0008236	serine-type peptidase activity	molecular_function	0.78737	1	232	15527	1205	76974	138	94
GO:0017171	serine hydrolase activity	molecular_function	0.78737	1	232	15527	1205	76974	138	94
GO:0034220	ion transmembrane transport	biological_process	0.97398	1	226	15527	1280	76974	138	88
GO:0006260	DNA replication	biological_process	0.98976	1	210	15527	1228	76974	138	72
GO:0020037	heme binding	molecular_function	0.6342	1	225	15527	1139	76974	137	88
GO:0055086	nucleobase-containing small molecule metabolic process	biological_process	0.95452	1	229	15527	1269	76974	137	92
GO:0071822	protein complex subunit organization	biological_process	0.52388	1	239	15527	1188	76974	136	103
GO:1901137	carbohydrate derivative biosynthetic process	biological_process	0.9917	1	206	15527	1205	76974	136	70
GO:0044764	multi-organism cellular process	biological_process	0.7144	1	220	15527	1160	76974	135	85
GO:0016746	transferase activity, transferring acyl groups	molecular_function	0.029379	0.47858	234	15527	1045	76974	134	100
GO:0065003	macromolecular complex assembly	biological_process	0.40845	1	230	15527	1125	76974	132	98
GO:0015077	monovalent inorganic cation transmembrane transporter activity	molecular_function	0.97602	1	206	15527	1176	76974	131	75
GO:1901605	alpha-amino acid metabolic process	biological_process	0.020775	0.4134	204	15527	882	76974	130	74
GO:0043565	sequence-specific DNA binding	molecular_function	0.29688	1	190	15527	907	76974	129	61
GO:0098772	molecular function regulator	molecular_function	0.63226	1	191	15527	985	76974	127	64
GO:0044419	interspecies interaction between organisms	biological_process	0.8777	1	210	15527	1146	76974	126	84
GO:0006461	protein complex assembly	biological_process	0.4149	1	221	15527	1079	76974	125	96
GO:0070271	protein complex biogenesis	biological_process	0.42119	1	221	15527	1080	76974	125	96
GO:0044403	symbiosis, encompassing mutualism through parasitism	biological_process	0.88764	1	209	15527	1144	76974	125	84
GO:0019012	virion	cellular_component	0.2247	1	194	15527	919	76974	124	70
GO:0016874	ligase activity	molecular_function	0.80681	1	226	15527	1149	76974	122	104
GO:0065008	regulation of biological quality	biological_process	0.99592	1	200	15527	1225	76974	122	78
GO:0009117	nucleotide metabolic process	biological_process	0.85079	1	205	15527	1091	76974	121	84
GO:0006753	nucleoside phosphate metabolic process	biological_process	0.85641	1	205	15527	1093	76974	121	84
GO:0006631	fatty acid metabolic process	biological_process	0.000115	0.008049	198	15527	760	76974	120	78
GO:0005694	chromosome	cellular_component	0.1625	1	192	15527	891	76974	120	72
GO:0003735	structural constituent of ribosome	molecular_function	0.2124	1	208	15527	1095	76974	119	89
GO:0005840	ribosome	cellular_component	0.26706	1	205	15527	1090	76974	119	86
GO:0008652	cellular amino acid biosynthetic process	biological_process	0.000251	0.015906	184	15527	716	76974	118	66
GO:1902589	single-organism organelle organization	biological_process	0.97846	1	203	15527	1134	76974	118	85
GO:0044423	virion part	cellular_component	0.24346	1	185	15527	879	76974	117	68
GO:0046983	protein dimerization activity	molecular_function	0.85116	1	192	15527	1011	76974	117	75
GO:0006732	coenzyme metabolic process	biological_process	0.029765	0.48009	190	15527	826	76974	116	74
GO:0016482	cytoplasmic transport	biological_process	0.81899	1	174	15527	922	76974	116	58
GO:0044262	cellular carbohydrate metabolic process	biological_process	0.94674	1	171	15527	944	76974	116	55
GO:0031974	membrane-enclosed lumen	cellular_component	0.99987	1	189	15527	1215	76974	116	73
GO:0030234	enzyme regulator activity	molecular_function	0.28594	1	174	15527	849	76974	115	59
GO:0098655	cation transmembrane transport	biological_process	0.95647	1	184	15527	1044	76974	115	69
GO:0043233	organelle lumen	cellular_component	0.99986	1	188	15527	1207	76974	115	73
GO:0070013	intracellular organelle lumen	cellular_component	0.99986	1	188	15527	1207	76974	115	73
GO:0016032	viral process	biological_process	0.29008	1	191	15527	915	76974	114	77
GO:0032403	protein complex binding	molecular_function	0.91789	1	167	15527	902	76974	114	53
GO:0098662	inorganic cation transmembrane transport	biological_process	0.95804	1	183	15527	1040	76974	114	69
GO:0098660	inorganic ion transmembrane transport	biological_process	0.95945	1	183	15527	1041	76974	114	69
GO:0008092	cytoskeletal protein binding	molecular_function	0.92754	1	179	15527	962	76974	112	67
GO:0046873	metal ion transmembrane transporter activity	molecular_function	0.99723	1	164	15527	1009	76974	112	52
GO:0016853	isomerase activity	molecular_function	0.39104	1	175	15527	879	76974	111	64
GO:0007049	cell cycle	biological_process	0.87433	1	193	15527	1036	76974	111	82
GO:0090407	organophosphate biosynthetic process	biological_process	0.99506	1	180	15527	1069	76974	111	69
GO:0004871	signal transducer activity	molecular_function	0.9988	1	169	15527	1049	76974	111	58
GO:0060089	molecular transducer activity	molecular_function	0.99953	1	171	15527	1078	76974	111	60
GO:1901657	glycosyl compound metabolic process	biological_process	0.88576	1	184	15527	1004	76974	110	74
GO:0009116	nucleoside metabolic process	biological_process	0.89784	1	183	15527	1003	76974	110	73
GO:0022804	active transmembrane transporter activity	molecular_function	0.98455	1	205	15527	1145	76974	109	96
GO:0031981	nuclear lumen	cellular_component	0.99982	1	179	15527	1151	76974	108	71
GO:0003678	DNA helicase activity	molecular_function	0.099329	0.98824	171	15527	755	76974	107	64
GO:0009057	macromolecule catabolic process	biological_process	0.73494	1	162	15527	853	76974	107	55
GO:0072521	purine-containing compound metabolic process	biological_process	0.82499	1	174	15527	927	76974	107	67
GO:0016791	phosphatase activity	molecular_function	0.005643	0.17096	166	15527	676	76974	106	60
GO:0044421	extracellular region part	cellular_component	0.001008	0.046845	150	15527	603	76974	104	46
GO:0051287	NAD binding	molecular_function	0.001496	0.063298	192	15527	782	76974	104	88
GO:0004518	nuclease activity	molecular_function	0.61814	1	160	15527	818	76974	104	56
GO:0016051	carbohydrate biosynthetic process	biological_process	0.93402	1	160	15527	882	76974	104	56
GO:0000152	nuclear ubiquitin ligase complex	cellular_component	2.39e-05	0.002388	150	15527	549	76974	103	47
GO:0005680	anaphase-promoting complex	cellular_component	2.39e-05	0.002388	150	15527	549	76974	103	47
GO:0031461	cullin-RING ubiquitin ligase complex	cellular_component	2.39e-05	0.002388	150	15527	549	76974	103	47
GO:0000151	ubiquitin ligase complex	cellular_component	6.59e-05	0.004994	151	15527	563	76974	103	48
GO:0019693	ribose phosphate metabolic process	biological_process	0.77701	1	175	15527	923	76974	103	72
GO:0051276	chromosome organization	biological_process	0.9575	1	169	15527	945	76974	102	67
GO:1901607	alpha-amino acid biosynthetic process	biological_process	0.001318	0.056802	158	15527	625	76974	101	57
GO:0044427	chromosomal part	cellular_component	0.24898	1	163	15527	770	76974	101	62
GO:0006163	purine nucleotide metabolic process	biological_process	0.80419	1	168	15527	892	76974	101	67
GO:0009451	RNA modification	biological_process	0.12113	1	166	15527	748	76974	100	66
GO:0051188	cofactor biosynthetic process	biological_process	0.26165	1	161	15527	756	76974	100	61
GO:0034622	cellular macromolecular complex assembly	biological_process	0.71994	1	176	15527	910	76974	100	76
GO:0009150	purine ribonucleotide metabolic process	biological_process	0.75896	1	166	15527	873	76974	100	66
GO:0009259	ribonucleotide metabolic process	biological_process	0.79039	1	166	15527	880	76974	100	66
GO:0009119	ribonucleoside metabolic process	biological_process	0.84055	1	165	15527	893	76974	100	65
GO:0016747	transferase activity, transferring acyl groups other than amino-acyl groups	molecular_function	0.022555	0.42881	169	15527	731	76974	99	70
GO:0042278	purine nucleoside metabolic process	biological_process	0.70344	1	164	15527	852	76974	99	65
GO:0046128	purine ribonucleoside metabolic process	biological_process	0.70344	1	164	15527	852	76974	99	65
GO:0044712	single-organism catabolic process	biological_process	0.13186	1	155	15527	709	76974	98	57
GO:0006091	generation of precursor metabolites and energy	biological_process	0.051796	0.68133	173	15527	767	76974	95	78
GO:0005739	mitochondrion	cellular_component	0.59481	1	148	15527	774	76974	95	53
GO:0006818	hydrogen transport	biological_process	0.96331	1	151	15527	858	76974	95	56
GO:0015992	proton transport	biological_process	0.96331	1	151	15527	858	76974	95	56
GO:0015078	hydrogen ion transmembrane transporter activity	molecular_function	0.72636	1	151	15527	795	76974	94	57
GO:0050660	flavin adenine dinucleotide binding	molecular_function	0.08509	0.91858	164	15527	724	76974	92	72
GO:0042221	response to chemical	biological_process	0.11709	1	156	15527	724	76974	92	64
GO:0070647	protein modification by small protein conjugation or removal	biological_process	0.011869	0.29181	147	15527	597	76974	91	56
GO:0005856	cytoskeleton	cellular_component	0.70121	1	166	15527	842	76974	91	75
GO:0008202	steroid metabolic process	biological_process	3.94e-15	6.16e-12	158	15527	448	76974	88	70
GO:0043623	cellular protein complex assembly	biological_process	0.6925	1	159	15527	814	76974	88	71
GO:0098805	whole membrane	cellular_component	0.78983	1	146	15527	770	76974	88	58
GO:0009378	four-way junction helicase activity	molecular_function	0.039542	0.56816	130	15527	543	76974	87	43
GO:0044430	cytoskeletal part	cellular_component	0.69814	1	158	15527	802	76974	87	71
GO:0006694	steroid biosynthetic process	biological_process	8.39e-15	9.85e-12	155	15527	439	76974	85	70
GO:0016835	carbon-oxygen lyase activity	molecular_function	4.27e-07	8.73e-05	157	15527	541	76974	84	73
GO:0034637	cellular carbohydrate biosynthetic process	biological_process	0.83777	1	126	15527	676	76974	84	42
GO:0007264	small GTPase mediated signal transduction	biological_process	0.86922	1	128	15527	702	76974	84	44
GO:0005976	polysaccharide metabolic process	biological_process	0.83805	1	125	15527	678	76974	83	42
GO:0005783	endoplasmic reticulum	cellular_component	0.89876	1	128	15527	728	76974	83	45
GO:0006914	autophagy	biological_process	0.98625	1	132	15527	774	76974	83	49
GO:0003724	RNA helicase activity	molecular_function	0.38054	1	115	15527	540	76974	82	33
GO:0019028	viral capsid	cellular_component	0.49124	1	135	15527	669	76974	82	53
GO:0008289	lipid binding	molecular_function	0.33181	1	121	15527	571	76974	81	40
GO:0008134	transcription factor binding	molecular_function	0.813	1	125	15527	650	76974	81	44
GO:0009108	coenzyme biosynthetic process	biological_process	0.12909	1	115	15527	513	76974	80	35
GO:1902600	hydrogen ion transmembrane transport	biological_process	0.85182	1	127	15527	696	76974	80	47
GO:1902580	single-organism cellular localization	biological_process	0.86385	1	120	15527	660	76974	80	40
GO:0044265	cellular macromolecule catabolic process	biological_process	0.88031	1	114	15527	628	76974	80	34
GO:0003854	3-beta-hydroxy-delta5-steroid dehydrogenase activity	molecular_function	1.1e-13	5.71e-11	149	15527	428	76974	79	70
GO:0016229	steroid dehydrogenase activity	molecular_function	1.1e-13	5.71e-11	149	15527	428	76974	79	70
GO:0033764	steroid dehydrogenase activity, acting on the CH-OH group of donors, NAD or NADP as acceptor	molecular_function	1.1e-13	5.71e-11	149	15527	428	76974	79	70
GO:0019058	viral life cycle	biological_process	0.61645	1	124	15527	628	76974	79	45
GO:0030117	membrane coat	cellular_component	0.94718	1	133	15527	736	76974	79	54
GO:0048475	coated membrane	cellular_component	0.94718	1	133	15527	736	76974	79	54
GO:0030246	carbohydrate binding	molecular_function	0.8038	1	109	15527	567	76974	78	31
GO:0006400	tRNA modification	biological_process	0.082419	0.8983	132	15527	576	76974	77	55
GO:0042623	ATPase activity, coupled	molecular_function	0.44222	1	146	15527	707	76974	77	69
GO:0006820	anion transport	biological_process	0.99991	1	120	15527	799	76974	77	43
GO:0022414	reproductive process	biological_process	0.64309	1	105	15527	521	76974	76	29
GO:0033365	protein localization to organelle	biological_process	0.904	1	119	15527	663	76974	76	43
GO:0042592	homeostatic process	biological_process	0.97319	1	120	15527	751	76974	76	44
GO:0016469	proton-transporting two-sector ATPase complex	cellular_component	0.52692	1	120	15527	611	76974	75	45
GO:0061024	membrane organization	biological_process	0.80782	1	105	15527	568	76974	75	30
GO:0006605	protein targeting	biological_process	0.9045	1	115	15527	643	76974	75	40
GO:0031975	envelope	cellular_component	0.92302	1	125	15527	709	76974	75	50
GO:0072330	monocarboxylic acid biosynthetic process	biological_process	0.006362	0.1865	114	15527	447	76974	74	40
GO:0015979	photosynthesis	biological_process	0.042171	0.59115	109	15527	504	76974	74	35
GO:0098687	chromosomal region	cellular_component	0.12763	1	110	15527	491	76974	74	36
GO:0044703	multi-organism reproductive process	biological_process	0.46719	1	102	15527	487	76974	74	28
GO:0031967	organelle envelope	cellular_component	0.91927	1	119	15527	676	76974	74	45
GO:0000775	chromosome, centromeric region	cellular_component	0.11181	1	109	15527	483	76974	73	36
GO:0016071	mRNA metabolic process	biological_process	0.90508	1	119	15527	652	76974	73	46
GO:0032502	developmental process	biological_process	0.9966	1	120	15527	751	76974	73	47
GO:0006633	fatty acid biosynthetic process	biological_process	0.001552	0.065081	112	15527	420	76974	72	40
GO:0016820	hydrolase activity, acting on acid anhydrides, catalyzing transmembrane movement of substances	molecular_function	0.42672	1	131	15527	638	76974	72	59
GO:0009165	nucleotide biosynthetic process	biological_process	0.94499	1	109	15527	626	76974	72	37
GO:1901293	nucleoside phosphate biosynthetic process	biological_process	0.94499	1	109	15527	626	76974	72	37
GO:0048193	Golgi vesicle transport	biological_process	0.62966	1	111	15527	558	76974	71	40
GO:0072594	establishment of protein localization to organelle	biological_process	0.83225	1	109	15527	593	76974	71	38
GO:0052689	carboxylic ester hydrolase activity	molecular_function	0.001202	0.052747	99	15527	372	76974	70	29
GO:0044429	mitochondrial part	cellular_component	0.80369	1	110	15527	607	76974	70	40
GO:0007010	cytoskeleton organization	biological_process	0.95532	1	123	15527	689	76974	70	53
GO:0005216	ion channel activity	molecular_function	0.99783	1	100	15527	631	76974	70	30
GO:0022838	substrate-specific channel activity	molecular_function	0.99783	1	100	15527	631	76974	70	30
GO:0015267	channel activity	molecular_function	0.99792	1	100	15527	632	76974	70	30
GO:0022803	passive transmembrane transporter activity	molecular_function	0.99792	1	100	15527	632	76974	70	30
GO:0034062	RNA polymerase activity	molecular_function	0.99917	1	118	15527	789	76974	70	48
GO:0005886	plasma membrane	cellular_component	0.99996	1	98	15527	712	76974	70	28
GO:0044707	single-multicellular organism process	biological_process	0.85183	1	114	15527	624	76974	69	45
GO:0044767	single-organism developmental process	biological_process	0.99454	1	112	15527	698	76974	69	43
GO:0005654	nucleoplasm	cellular_component	0.99985	1	113	15527	780	76974	69	44
GO:0044451	nucleoplasm part	cellular_component	0.99985	1	113	15527	780	76974	69	44
GO:0044802	single-organism membrane organization	biological_process	0.806	1	94	15527	512	76974	68	26
GO:0022402	cell cycle process	biological_process	0.89246	1	120	15527	654	76974	68	52
GO:0005578	proteinaceous extracellular matrix	cellular_component	5.77e-06	0.000721	87	15527	291	76974	67	20
GO:0031012	extracellular matrix	cellular_component	8.7e-05	0.006288	87	15527	310	76974	67	20
GO:0016701	oxidoreductase activity, acting on single donors with incorporation of molecular oxygen	molecular_function	0.040793	0.57874	104	15527	437	76974	67	37
GO:0009126	purine nucleoside monophosphate metabolic process	biological_process	0.91917	1	116	15527	655	76974	67	49
GO:0009167	purine ribonucleoside monophosphate metabolic process	biological_process	0.91917	1	116	15527	655	76974	67	49
GO:0009161	ribonucleoside monophosphate metabolic process	biological_process	0.93556	1	116	15527	662	76974	67	49
GO:0009123	nucleoside monophosphate metabolic process	biological_process	0.94166	1	116	15527	665	76974	67	49
GO:0008194	UDP-glycosyltransferase activity	molecular_function	0.99984	1	111	15527	732	76974	67	44
GO:0030170	pyridoxal phosphate binding	molecular_function	0.046225	0.63472	97	15527	404	76974	66	31
GO:0007186	G-protein coupled receptor signaling pathway	biological_process	0.99427	1	87	15527	571	76974	66	21
GO:0022613	ribonucleoprotein complex biogenesis	biological_process	0.0024	0.086138	101	15527	390	76974	65	36
GO:0008037	cell recognition	biological_process	0.21225	1	88	15527	388	76974	65	23
GO:0033013	tetrapyrrole metabolic process	biological_process	0.28663	1	108	15527	510	76974	65	43
GO:0009579	thylakoid	cellular_component	0.35742	1	84	15527	441	76974	65	19
GO:0044436	thylakoid part	cellular_component	0.35742	1	84	15527	441	76974	65	19
GO:0044264	cellular polysaccharide metabolic process	biological_process	0.9152	1	96	15527	545	76974	65	31
GO:0006952	defense response	biological_process	0.06969	0.80806	98	15527	439	76974	64	34
GO:0032446	protein modification by small protein conjugation	biological_process	0.071453	0.82443	91	15527	382	76974	64	27
GO:0009521	photosystem	cellular_component	0.10809	1	83	15527	401	76974	64	19
GO:0009856	pollination	biological_process	0.22742	1	86	15527	380	76974	64	22
GO:0009875	pollen-pistil interaction	biological_process	0.22742	1	86	15527	380	76974	64	22
GO:0048544	recognition of pollen	biological_process	0.22742	1	86	15527	380	76974	64	22
GO:0044706	multi-multicellular organism process	biological_process	0.28572	1	86	15527	387	76974	64	22
GO:0034357	photosynthetic membrane	cellular_component	0.29541	1	83	15527	429	76974	64	19
GO:0015399	primary active transmembrane transporter activity	molecular_function	0.61888	1	115	15527	576	76974	64	51
GO:0015405	P-P-bond-hydrolysis-driven transmembrane transporter activity	molecular_function	0.61888	1	115	15527	576	76974	64	51
GO:0005740	mitochondrial envelope	cellular_component	0.77766	1	103	15527	565	76974	64	39
GO:0006813	potassium ion transport	biological_process	0.049253	0.65708	100	15527	421	76974	63	37
GO:0051082	unfolded protein binding	molecular_function	0.27865	1	95	15527	446	76974	63	32
GO:0009055	electron carrier activity	molecular_function	0.23071	1	96	15527	479	76974	62	34
GO:0006457	protein folding	biological_process	0.65076	1	93	15527	489	76974	62	31
GO:0031966	mitochondrial membrane	cellular_component	0.76689	1	101	15527	551	76974	62	39
GO:0000988	transcription factor activity, protein binding	molecular_function	0.94782	1	91	15527	539	76974	62	29
GO:0003899	DNA-directed RNA polymerase activity	molecular_function	0.99291	1	100	15527	653	76974	62	38
GO:0016567	protein ubiquitination	biological_process	0.062323	0.76017	86	15527	357	76974	61	25
GO:0043038	amino acid activation	biological_process	0.6607	1	114	15527	567	76974	61	53
GO:0043039	tRNA aminoacylation	biological_process	0.6607	1	114	15527	567	76974	61	53
GO:0005102	receptor binding	molecular_function	0.70065	1	107	15527	550	76974	61	46
GO:0019725	cellular homeostasis	biological_process	0.93189	1	92	15527	551	76974	61	31
GO:0072522	purine-containing compound biosynthetic process	biological_process	0.96076	1	88	15527	523	76974	61	27
GO:0015631	tubulin binding	molecular_function	0.76445	1	93	15527	480	76974	60	33
GO:0038023	signaling receptor activity	molecular_function	0.93259	1	106	15527	613	76974	60	46
GO:0006073	cellular glucan metabolic process	biological_process	0.9453	1	90	15527	524	76974	60	30
GO:0044042	glucan metabolic process	biological_process	0.9453	1	90	15527	524	76974	60	30
GO:0004872	receptor activity	molecular_function	0.96893	1	108	15527	642	76974	60	48
GO:0051536	iron-sulfur cluster binding	molecular_function	4.78e-05	0.003775	94	15527	324	76974	59	35
GO:0051540	metal cluster binding	molecular_function	4.78e-05	0.003775	94	15527	324	76974	59	35
GO:0042254	ribosome biogenesis	biological_process	0.003875	0.1238	93	15527	361	76974	59	34
GO:0015988	energy coupled proton transmembrane transport, against electrochemical gradient	biological_process	0.22619	1	93	15527	433	76974	59	34
GO:0015991	ATP hydrolysis coupled proton transport	biological_process	0.22619	1	93	15527	433	76974	59	34
GO:0030163	protein catabolic process	biological_process	0.93607	1	83	15527	482	76974	59	24
GO:0046034	ATP metabolic process	biological_process	0.96157	1	106	15527	620	76974	59	47
GO:0009141	nucleoside triphosphate metabolic process	biological_process	0.983	1	107	15527	646	76974	59	48
GO:0009144	purine nucleoside triphosphate metabolic process	biological_process	0.983	1	107	15527	646	76974	59	48
GO:0009199	ribonucleoside triphosphate metabolic process	biological_process	0.983	1	107	15527	646	76974	59	48
GO:0009205	purine ribonucleoside triphosphate metabolic process	biological_process	0.983	1	107	15527	646	76974	59	48
GO:0006418	tRNA aminoacylation for protein translation	biological_process	0.5411	1	108	15527	523	76974	58	50
GO:0004674	protein serine/threonine kinase activity	molecular_function	0.68274	1	108	15527	543	76974	58	50
GO:0016875	ligase activity, forming carbon-oxygen bonds	molecular_function	0.71998	1	111	15527	560	76974	58	53
GO:0016876	ligase activity, forming aminoacyl-tRNA and related compounds	molecular_function	0.71998	1	111	15527	560	76974	58	53
GO:0006397	mRNA processing	biological_process	0.79086	1	94	15527	498	76974	58	36
GO:0098519	nucleotide phosphatase activity, acting on free nucleotides	molecular_function	0.000209	0.014223	88	15527	299	76974	57	31
GO:0070085	glycosylation	biological_process	0.23828	1	92	15527	421	76974	57	35
GO:0004812	aminoacyl-tRNA ligase activity	molecular_function	0.56535	1	109	15527	531	76974	57	52
GO:0019031	viral envelope	cellular_component	0.138	1	83	15527	367	76974	56	27
GO:0036338	viral membrane	cellular_component	0.138	1	83	15527	367	76974	56	27
GO:0043566	structure-specific DNA binding	molecular_function	0.19759	1	83	15527	371	76974	56	27
GO:0042802	identical protein binding	molecular_function	0.9406	1	91	15527	510	76974	56	35
GO:0008238	exopeptidase activity	molecular_function	0.96841	1	95	15527	548	76974	56	39
GO:0016836	hydro-lyase activity	molecular_function	0.002457	0.08676	77	15527	282	76974	55	22
GO:0048519	negative regulation of biological process	biological_process	0.030071	0.48195	109	15527	458	76974	55	54
GO:0016627	oxidoreductase activity, acting on the CH-CH group of donors	molecular_function	0.38994	1	108	15527	523	76974	55	53
GO:0006164	purine nucleotide biosynthetic process	biological_process	0.95461	1	82	15527	488	76974	55	27
GO:0044257	cellular protein catabolic process	biological_process	0.95941	1	78	15527	464	76974	55	23
GO:0051603	proteolysis involved in cellular protein catabolic process	biological_process	0.95941	1	78	15527	464	76974	55	23
GO:0071949	FAD binding	molecular_function	7.64e-05	0.005694	103	15527	355	76974	54	49
GO:0016052	carbohydrate catabolic process	biological_process	0.047294	0.63637	93	15527	392	76974	54	39
GO:0046903	secretion	biological_process	0.065222	0.7754	81	15527	340	76974	54	27
GO:0033176	proton-transporting V-type ATPase complex	cellular_component	0.17099	1	86	15527	388	76974	54	32
GO:0009152	purine ribonucleotide biosynthetic process	biological_process	0.93299	1	80	15527	469	76974	54	26
GO:0009260	ribonucleotide biosynthetic process	biological_process	0.94928	1	80	15527	476	76974	54	26
GO:0046390	ribose phosphate biosynthetic process	biological_process	0.94928	1	80	15527	476	76974	54	26
GO:0016830	carbon-carbon lyase activity	molecular_function	0.97635	1	91	15527	550	76974	54	37
GO:1901659	glycosyl compound biosynthetic process	biological_process	0.97756	1	80	15527	499	76974	54	26
GO:0009163	nucleoside biosynthetic process	biological_process	0.98225	1	79	15527	498	76974	54	25
GO:0042455	ribonucleoside biosynthetic process	biological_process	0.98225	1	79	15527	498	76974	54	25
GO:0006366	transcription from RNA polymerase II promoter	biological_process	0.99734	1	89	15527	582	76974	54	35
GO:0005938	cell cortex	cellular_component	0.002251	0.083248	77	15527	275	76974	53	24
GO:0032940	secretion by cell	biological_process	0.069576	0.80806	80	15527	336	76974	53	27
GO:0002949	tRNA threonylcarbamoyladenosine modification	biological_process	0.082867	0.8983	88	15527	369	76974	53	35
GO:0070525	tRNA threonylcarbamoyladenosine metabolic process	biological_process	0.082867	0.8983	88	15527	369	76974	53	35
GO:0042626	ATPase activity, coupled to transmembrane movement of substances	molecular_function	0.55547	1	95	15527	472	76974	53	42
GO:0043492	ATPase activity, coupled to movement of substances	molecular_function	0.55547	1	95	15527	472	76974	53	42
GO:0009311	oligosaccharide metabolic process	biological_process	0.67966	1	76	15527	389	76974	53	23
GO:0042451	purine nucleoside biosynthetic process	biological_process	0.93923	1	78	15527	459	76974	53	25
GO:0046129	purine ribonucleoside biosynthetic process	biological_process	0.93923	1	78	15527	459	76974	53	25
GO:0051246	regulation of protein metabolic process	biological_process	0.97525	1	94	15527	544	76974	53	41
GO:0046527	glucosyltransferase activity	molecular_function	0.99946	1	84	15527	563	76974	53	31
GO:0044448	cell cortex part	cellular_component	0.002832	0.096359	75	15527	269	76974	52	23
GO:0019439	aromatic compound catabolic process	biological_process	0.21554	1	76	15527	349	76974	52	24
GO:0051213	dioxygenase activity	molecular_function	0.2614	1	81	15527	371	76974	52	29
GO:1901361	organic cyclic compound catabolic process	biological_process	0.284	1	76	15527	359	76974	52	24
GO:0008135	translation factor activity, RNA binding	molecular_function	0.33494	1	76	15527	368	76974	52	24
GO:0006928	movement of cell or subcellular component	biological_process	0.89507	1	90	15527	496	76974	52	38
GO:0004252	serine-type endopeptidase activity	molecular_function	0.99978	1	83	15527	572	76974	52	31
GO:0016702	oxidoreductase activity, acting on single donors with incorporation of molecular oxygen, incorporation of two atoms of oxygen	molecular_function	0.11351	1	79	15527	341	76974	51	28
GO:0007017	microtubule-based process	biological_process	0.79399	1	90	15527	473	76974	51	39
GO:0090150	establishment of protein localization to membrane	biological_process	0.83903	1	67	15527	377	76974	51	16
GO:0072657	protein localization to membrane	biological_process	0.85568	1	67	15527	380	76974	51	16
GO:0019867	outer membrane	cellular_component	0.91905	1	81	15527	461	76974	51	30
GO:0048518	positive regulation of biological process	biological_process	0.99258	1	78	15527	495	76974	51	27
GO:0000287	magnesium ion binding	molecular_function	0.00074	0.037773	120	15527	451	76974	50	70
GO:0009523	photosystem II	cellular_component	0.015095	0.33756	67	15527	290	76974	50	17
GO:0044270	cellular nitrogen compound catabolic process	biological_process	0.34639	1	74	15527	356	76974	50	24
GO:0032259	methylation	biological_process	0.86933	1	79	15527	450	76974	50	29
GO:0006511	ubiquitin-dependent protein catabolic process	biological_process	0.88873	1	71	15527	400	76974	50	21
GO:0019941	modification-dependent protein catabolic process	biological_process	0.89811	1	71	15527	402	76974	50	21
GO:0043632	modification-dependent macromolecule catabolic process	biological_process	0.89811	1	71	15527	402	76974	50	21
GO:0032268	regulation of cellular protein metabolic process	biological_process	0.98552	1	90	15527	533	76974	50	40
GO:0008509	anion transmembrane transporter activity	molecular_function	0.99964	1	76	15527	521	76974	50	26
GO:0071705	nitrogen compound transport	biological_process	0.99982	1	80	15527	571	76974	50	30
GO:0031982	vesicle	cellular_component	0.43636	1	74	15527	352	76974	49	25
GO:0003712	transcription cofactor activity	molecular_function	0.8994	1	72	15527	423	76974	49	23
GO:0000989	transcription factor activity, transcription factor binding	molecular_function	0.91046	1	72	15527	426	76974	49	23
GO:0044432	endoplasmic reticulum part	cellular_component	0.95381	1	78	15527	479	76974	49	29
GO:0048522	positive regulation of cellular process	biological_process	0.9806	1	76	15527	467	76974	49	27
GO:0006887	exocytosis	biological_process	0.00197	0.078415	71	15527	247	76974	48	23
GO:0030312	external encapsulating structure	cellular_component	0.04622	0.63472	68	15527	281	76974	48	20
GO:0046700	heterocycle catabolic process	biological_process	0.34213	1	72	15527	346	76974	48	24
GO:0031410	cytoplasmic vesicle	cellular_component	0.4475	1	73	15527	348	76974	48	25
GO:0015630	microtubule cytoskeleton	cellular_component	0.57661	1	78	15527	390	76974	48	30
GO:0070008	serine-type exopeptidase activity	molecular_function	0.61736	1	80	15527	404	76974	48	32
GO:0033177	proton-transporting two-sector ATPase complex, proton-transporting domain	cellular_component	0.71946	1	73	15527	393	76974	48	25
GO:0000003	reproduction	biological_process	0.91959	1	77	15527	448	76974	48	29
GO:0009892	negative regulation of metabolic process	biological_process	0.000673	0.035119	91	15527	328	76974	47	44
GO:0015980	energy derivation by oxidation of organic compounds	biological_process	0.3082	1	77	15527	362	76974	47	30
GO:0031988	membrane-bounded vesicle	cellular_component	0.4891	1	72	15527	347	76974	47	25
GO:0045454	cell redox homeostasis	biological_process	0.62275	1	72	15527	387	76974	47	25
GO:0004519	endonuclease activity	molecular_function	0.65884	1	72	15527	381	76974	47	25
GO:0033692	cellular polysaccharide biosynthetic process	biological_process	0.97763	1	77	15527	468	76974	47	30
GO:0000271	polysaccharide biosynthetic process	biological_process	0.98264	1	77	15527	473	76974	47	30
GO:0016485	protein processing	biological_process	0.98273	1	73	15527	462	76974	47	26
GO:0051604	protein maturation	biological_process	0.98273	1	73	15527	462	76974	47	26
GO:0022836	gated channel activity	molecular_function	0.98402	1	63	15527	393	76974	47	16
GO:0008237	metallopeptidase activity	molecular_function	0.99524	1	82	15527	504	76974	47	35
GO:0044459	plasma membrane part	cellular_component	0.99962	1	58	15527	437	76974	47	11
GO:0035251	UDP-glucosyltransferase activity	molecular_function	0.9998	1	77	15527	536	76974	47	30
GO:0006364	rRNA processing	biological_process	0.002952	0.099021	74	15527	273	76974	46	28
GO:0016072	rRNA metabolic process	biological_process	0.002952	0.099021	74	15527	273	76974	46	28
GO:0004857	enzyme inhibitor activity	molecular_function	0.24111	1	62	15527	300	76974	46	16
GO:0016023	cytoplasmic membrane-bounded vesicle	cellular_component	0.50077	1	71	15527	343	76974	46	25
GO:0016209	antioxidant activity	molecular_function	0.55981	1	83	15527	435	76974	46	37
GO:0008017	microtubule binding	molecular_function	0.61305	1	69	15527	344	76974	46	23
GO:0004190	aspartic-type endopeptidase activity	molecular_function	0.99562	1	69	15527	469	76974	46	23
GO:0070001	aspartic-type peptidase activity	molecular_function	0.99562	1	69	15527	469	76974	46	23
GO:0000145	exocyst	cellular_component	2.04e-05	0.002233	61	15527	177	76974	45	16
GO:0010605	negative regulation of macromolecule metabolic process	biological_process	0.000301	0.018594	88	15527	306	76974	45	43
GO:0006486	protein glycosylation	biological_process	0.58048	1	68	15527	340	76974	45	23
GO:0043413	macromolecule glycosylation	biological_process	0.58048	1	68	15527	340	76974	45	23
GO:0005984	disaccharide metabolic process	biological_process	0.58971	1	61	15527	303	76974	45	16
GO:0009101	glycoprotein biosynthetic process	biological_process	0.62783	1	72	15527	364	76974	45	27
GO:0009100	glycoprotein metabolic process	biological_process	0.63807	1	72	15527	365	76974	45	27
GO:0009405	pathogenesis	biological_process	0.95827	1	72	15527	456	76974	45	27
GO:0005789	endoplasmic reticulum membrane	cellular_component	0.96138	1	73	15527	456	76974	45	28
GO:0042175	nuclear outer membrane-endoplasmic reticulum membrane network	cellular_component	0.9716	1	73	15527	462	76974	45	28
GO:0071554	cell wall organization or biogenesis	biological_process	0.023094	0.42943	68	15527	270	76974	44	24
GO:0048523	negative regulation of cellular process	biological_process	0.023152	0.42943	88	15527	358	76974	44	44
GO:0009312	oligosaccharide biosynthetic process	biological_process	0.12313	1	56	15527	241	76974	44	12
GO:0045333	cellular respiration	biological_process	0.16602	1	73	15527	327	76974	44	29
GO:0033014	tetrapyrrole biosynthetic process	biological_process	0.51621	1	74	15527	366	76974	43	31
GO:0015291	secondary active transmembrane transporter activity	molecular_function	0.99558	1	85	15527	526	76974	43	42
GO:0044433	cytoplasmic vesicle part	cellular_component	0.58955	1	64	15527	315	76974	42	22
GO:0000776	kinetochore	cellular_component	0.66464	1	63	15527	326	76974	42	21
GO:0040011	locomotion	biological_process	0.78681	1	77	15527	414	76974	42	35
GO:0005996	monosaccharide metabolic process	biological_process	0.92086	1	57	15527	330	76974	42	15
GO:0009250	glucan biosynthetic process	biological_process	0.98858	1	71	15527	447	76974	42	29
GO:0006261	DNA-dependent DNA replication	biological_process	0.99089	1	70	15527	476	76974	42	28
GO:0005618	cell wall	cellular_component	0.007383	0.20607	53	15527	193	76974	41	12
GO:0000160	phosphorelay signal transduction system	biological_process	0.33242	1	69	15527	321	76974	41	28
GO:0012506	vesicle membrane	cellular_component	0.63223	1	63	15527	314	76974	41	22
GO:0003779	actin binding	molecular_function	0.8889	1	65	15527	365	76974	41	24
GO:0016831	carboxy-lyase activity	molecular_function	0.96435	1	70	15527	426	76974	41	29
GO:0006352	DNA-templated transcription, initiation	biological_process	0.99803	1	70	15527	470	76974	41	29
GO:0005543	phospholipid binding	molecular_function	0.14579	1	51	15527	216	76974	40	11
GO:0006778	porphyrin-containing compound metabolic process	biological_process	0.31034	1	74	15527	347	76974	40	34
GO:0030133	transport vesicle	cellular_component	0.31235	1	60	15527	273	76974	40	20
GO:1901565	organonitrogen compound catabolic process	biological_process	0.47226	1	66	15527	329	76974	40	26
GO:0004540	ribonuclease activity	molecular_function	0.51473	1	69	15527	344	76974	40	29
GO:0017038	protein import	biological_process	0.53668	1	68	15527	339	76974	40	28
GO:0030659	cytoplasmic vesicle membrane	cellular_component	0.64469	1	62	15527	310	76974	40	22
GO:0030120	vesicle coat	cellular_component	0.68614	1	60	15527	304	76974	40	20
GO:0030135	coated vesicle	cellular_component	0.68614	1	60	15527	304	76974	40	20
GO:0030662	coated vesicle membrane	cellular_component	0.68614	1	60	15527	304	76974	40	20
GO:0060589	nucleoside-triphosphatase regulator activity	molecular_function	0.75364	1	61	15527	330	76974	40	21
GO:0006270	DNA replication initiation	biological_process	0.79038	1	64	15527	347	76974	40	24
GO:0043414	macromolecule methylation	biological_process	0.9148	1	61	15527	366	76974	40	21
GO:0051274	beta-glucan biosynthetic process	biological_process	0.98028	1	69	15527	427	76974	40	29
GO:0051273	beta-glucan metabolic process	biological_process	0.9943	1	69	15527	448	76974	40	29
GO:0042440	pigment metabolic process	biological_process	0.11034	1	73	15527	317	76974	39	34
GO:0008234	cysteine-type peptidase activity	molecular_function	0.77295	1	70	15527	379	76974	39	31
GO:0006357	regulation of transcription from RNA polymerase II promoter	biological_process	0.85471	1	55	15527	321	76974	39	16
GO:0007275	multicellular organismal development	biological_process	0.88045	1	57	15527	332	76974	39	18
GO:0003774	motor activity	molecular_function	0.89252	1	60	15527	331	76974	39	21
GO:0009308	amine metabolic process	biological_process	0.13583	1	73	15527	319	76974	38	35
GO:0010033	response to organic substance	biological_process	0.36071	1	58	15527	278	76974	38	20
GO:0006888	ER to Golgi vesicle-mediated transport	biological_process	0.37195	1	55	15527	255	76974	38	17
GO:0008757	S-adenosylmethionine-dependent methyltransferase activity	molecular_function	0.54967	1	68	15527	340	76974	38	30
GO:0004527	exonuclease activity	molecular_function	0.73488	1	62	15527	328	76974	38	24
GO:0044455	mitochondrial membrane part	cellular_component	0.77641	1	59	15527	332	76974	38	21
GO:0010608	posttranscriptional regulation of gene expression	biological_process	0.86918	1	71	15527	382	76974	38	33
GO:0015711	organic anion transport	biological_process	0.98965	1	61	15527	398	76974	38	23
GO:0045229	external encapsulating structure organization	biological_process	0.005438	0.16583	52	15527	184	76974	37	15
GO:0003743	translation initiation factor activity	molecular_function	0.22427	1	47	15527	215	76974	37	10
GO:0006733	oxidoreduction coenzyme metabolic process	biological_process	0.30907	1	71	15527	330	76974	37	34
GO:0042995	cell projection	cellular_component	0.604	1	61	15527	307	76974	37	24
GO:0042803	protein homodimerization activity	molecular_function	0.66706	1	62	15527	319	76974	37	25
GO:0006575	cellular modified amino acid metabolic process	biological_process	0.73331	1	51	15527	270	76974	37	14
GO:0009607	response to biotic stimulus	biological_process	0.88718	1	71	15527	442	76974	37	34
GO:0006417	regulation of translation	biological_process	0.89998	1	69	15527	378	76974	37	32
GO:0034248	regulation of cellular amide metabolic process	biological_process	0.89998	1	69	15527	378	76974	37	32
GO:0070972	protein localization to endoplasmic reticulum	biological_process	0.93391	1	49	15527	299	76974	37	12
GO:0048856	anatomical structure development	biological_process	0.97515	1	67	15527	412	76974	37	30
GO:0015849	organic acid transport	biological_process	0.99177	1	60	15527	396	76974	37	23
GO:0046942	carboxylic acid transport	biological_process	0.99177	1	60	15527	396	76974	37	23
GO:0016903	oxidoreductase activity, acting on the aldehyde or oxo group of donors	molecular_function	4.55e-07	8.9e-05	86	15527	263	76974	36	50
GO:0000105	histidine biosynthetic process	biological_process	0.002269	0.083253	48	15527	162	76974	36	12
GO:0006547	histidine metabolic process	biological_process	0.003022	0.099222	49	15527	168	76974	36	13
GO:0052803	imidazole-containing compound metabolic process	biological_process	0.003022	0.099222	49	15527	168	76974	36	13
GO:0046351	disaccharide biosynthetic process	biological_process	0.033974	0.53004	41	15527	155	76974	36	5
GO:0012507	ER to Golgi transport vesicle membrane	cellular_component	0.29614	1	53	15527	237	76974	36	17
GO:0030127	COPII vesicle coat	cellular_component	0.29614	1	53	15527	237	76974	36	17
GO:0030134	ER to Golgi transport vesicle	cellular_component	0.29614	1	53	15527	237	76974	36	17
GO:0019898	extrinsic component of membrane	cellular_component	0.31317	1	56	15527	270	76974	36	20
GO:0030658	transport vesicle membrane	cellular_component	0.45174	1	54	15527	255	76974	36	18
GO:0005743	mitochondrial inner membrane	cellular_component	0.47078	1	60	15527	308	76974	36	24
GO:0019866	organelle inner membrane	cellular_component	0.48458	1	62	15527	319	76974	36	26
GO:0048583	regulation of response to stimulus	biological_process	0.52951	1	47	15527	234	76974	36	11
GO:0098798	mitochondrial protein complex	cellular_component	0.81835	1	57	15527	327	76974	36	21
GO:0009894	regulation of catabolic process	biological_process	0.82496	1	60	15527	326	76974	36	24
GO:0004222	metalloendopeptidase activity	molecular_function	0.82656	1	61	15527	327	76974	36	25
GO:0006612	protein targeting to membrane	biological_process	0.85008	1	47	15527	271	76974	36	11
GO:0001871	pattern binding	molecular_function	0.87699	1	56	15527	311	76974	36	20
GO:0030247	polysaccharide binding	molecular_function	0.87699	1	56	15527	311	76974	36	20
GO:0015698	inorganic anion transport	biological_process	0.99814	1	52	15527	354	76974	36	16
GO:0010629	negative regulation of gene expression	biological_process	9.14e-05	0.006506	70	15527	223	76974	35	35
GO:0031324	negative regulation of cellular metabolic process	biological_process	0.000767	0.038709	69	15527	237	76974	35	34
GO:0071555	cell wall organization	biological_process	0.01426	0.33089	49	15527	180	76974	35	14
GO:0019205	nucleobase-containing compound kinase activity	molecular_function	0.12165	1	47	15527	198	76974	35	12
GO:0005991	trehalose metabolic process	biological_process	0.13951	1	45	15527	190	76974	35	10
GO:0004185	serine-type carboxypeptidase activity	molecular_function	0.39179	1	58	15527	277	76974	35	23
GO:0000228	nuclear chromosome	cellular_component	0.62972	1	58	15527	300	76974	35	23
GO:0004180	carboxypeptidase activity	molecular_function	0.6371	1	58	15527	298	76974	35	23
GO:0001076	transcription factor activity, RNA polymerase II transcription factor binding	molecular_function	0.76736	1	47	15527	269	76974	35	12
GO:0001104	RNA polymerase II transcription cofactor activity	molecular_function	0.76736	1	47	15527	269	76974	35	12
GO:0016592	mediator complex	cellular_component	0.78533	1	47	15527	271	76974	35	12
GO:0015297	antiporter activity	molecular_function	0.80845	1	73	15527	383	76974	35	38
GO:0045047	protein targeting to ER	biological_process	0.87414	1	46	15527	269	76974	35	11
GO:0072599	establishment of protein localization to endoplasmic reticulum	biological_process	0.87414	1	46	15527	269	76974	35	11
GO:0006613	cotranslational protein targeting to membrane	biological_process	0.8839	1	45	15527	265	76974	35	10
GO:0006614	SRP-dependent cotranslational protein targeting to membrane	biological_process	0.8839	1	45	15527	265	76974	35	10
GO:0004888	transmembrane signaling receptor activity	molecular_function	0.9405	1	58	15527	364	76974	35	23
GO:0009605	response to external stimulus	biological_process	0.99955	1	63	15527	482	76974	35	28
GO:0008171	O-methyltransferase activity	molecular_function	0.013767	0.32168	49	15527	188	76974	34	15
GO:0019201	nucleotide kinase activity	molecular_function	0.013769	0.32168	44	15527	156	76974	34	10
GO:0015074	DNA integration	biological_process	0.046841	0.63608	66	15527	261	76974	34	32
GO:1990204	oxidoreductase complex	cellular_component	0.048986	0.65538	50	15527	221	76974	34	16
GO:0005992	trehalose biosynthetic process	biological_process	0.049957	0.66164	37	15527	142	76974	34	3
GO:0003682	chromatin binding	molecular_function	0.10099	0.99517	48	15527	197	76974	34	14
GO:0016810	hydrolase activity, acting on carbon-nitrogen (but not peptide) bonds	molecular_function	0.52952	1	52	15527	264	76974	34	18
GO:0005615	extracellular space	cellular_component	0.64393	1	59	15527	303	76974	34	25
GO:0005794	Golgi apparatus	cellular_component	0.95618	1	54	15527	324	76974	34	20
GO:0033865	nucleoside bisphosphate metabolic process	biological_process	0.006394	0.1865	49	15527	170	76974	33	16
GO:0033875	ribonucleoside bisphosphate metabolic process	biological_process	0.006394	0.1865	49	15527	170	76974	33	16
GO:0034032	purine nucleoside bisphosphate metabolic process	biological_process	0.006394	0.1865	49	15527	170	76974	33	16
GO:0044724	single-organism carbohydrate catabolic process	biological_process	0.028458	0.47547	61	15527	239	76974	33	28
GO:0003857	3-hydroxyacyl-CoA dehydrogenase activity	molecular_function	0.11418	1	60	15527	255	76974	33	27
GO:0072524	pyridine-containing compound metabolic process	biological_process	0.25004	1	68	15527	309	76974	33	35
GO:0006576	cellular biogenic amine metabolic process	biological_process	0.26116	1	52	15527	237	76974	33	19
GO:0044106	cellular amine metabolic process	biological_process	0.26116	1	52	15527	237	76974	33	19
GO:0000793	condensed chromosome	cellular_component	0.30598	1	55	15527	253	76974	33	22
GO:0019079	viral genome replication	biological_process	0.34984	1	49	15527	224	76974	33	16
GO:0008380	RNA splicing	biological_process	0.60499	1	51	15527	262	76974	33	18
GO:0051258	protein polymerization	biological_process	0.63606	1	64	15527	325	76974	33	31
GO:0018193	peptidyl-amino acid modification	biological_process	0.87544	1	50	15527	295	76974	33	17
GO:0031329	regulation of cellular catabolic process	biological_process	0.88617	1	56	15527	315	76974	33	23
GO:0031683	G-protein beta/gamma-subunit complex binding	molecular_function	0.98267	1	41	15527	271	76974	33	8
GO:0009072	aromatic amino acid family metabolic process	biological_process	0.007999	0.21588	46	15527	161	76974	32	14
GO:0004497	monooxygenase activity	molecular_function	0.019998	0.4043	59	15527	225	76974	32	27
GO:0016645	oxidoreductase activity, acting on the CH-NH group of donors	molecular_function	0.024569	0.43212	49	15527	184	76974	32	17
GO:0016866	intramolecular transferase activity	molecular_function	0.064954	0.77458	50	15527	204	76974	32	18
GO:0019362	pyridine nucleotide metabolic process	biological_process	0.21741	1	65	15527	291	76974	32	33
GO:0046496	nicotinamide nucleotide metabolic process	biological_process	0.21741	1	65	15527	291	76974	32	33
GO:0004616	phosphogluconate dehydrogenase (decarboxylating) activity	molecular_function	0.29329	1	46	15527	211	76974	32	14
GO:0033179	proton-transporting V-type ATPase, V0 domain	cellular_component	0.32319	1	47	15527	216	76974	32	15
GO:0006313	transposition, DNA-mediated	biological_process	0.52092	1	44	15527	213	76974	32	12
GO:0032196	transposition	biological_process	0.52092	1	44	15527	213	76974	32	12
GO:0030244	cellulose biosynthetic process	biological_process	0.62699	1	58	15527	288	76974	32	26
GO:0042398	cellular modified amino acid biosynthetic process	biological_process	0.66876	1	43	15527	221	76974	32	11
GO:0030243	cellulose metabolic process	biological_process	0.81765	1	58	15527	309	76974	32	26
GO:0015103	inorganic anion transmembrane transporter activity	molecular_function	0.97707	1	46	15527	284	76974	32	14
GO:0019318	hexose metabolic process	biological_process	0.98666	1	46	15527	299	76974	32	14
GO:0070925	organelle assembly	biological_process	0.98898	1	52	15527	342	76974	32	20
GO:0006644	phospholipid metabolic process	biological_process	0.99944	1	55	15527	401	76974	32	23
GO:0036459	ubiquitinyl hydrolase activity	molecular_function	0.064988	0.77458	62	15527	249	76974	31	31
GO:0008565	protein transporter activity	molecular_function	0.76969	1	51	15527	287	76974	31	20
GO:0071103	DNA conformation change	biological_process	0.78528	1	46	15527	250	76974	31	15
GO:0065004	protein-DNA complex assembly	biological_process	0.79511	1	44	15527	247	76974	31	13
GO:0071824	protein-DNA complex subunit organization	biological_process	0.79511	1	44	15527	247	76974	31	13
GO:0003690	double-stranded DNA binding	molecular_function	0.81985	1	54	15527	291	76974	31	23
GO:0045182	translation regulator activity	molecular_function	0.88022	1	60	15527	324	76974	31	29
GO:0009893	positive regulation of metabolic process	biological_process	0.99741	1	52	15527	356	76974	31	21
GO:0043648	dicarboxylic acid metabolic process	biological_process	0.008483	0.22634	60	15527	226	76974	30	30
GO:0044454	nuclear chromosome part	cellular_component	0.73057	1	50	15527	269	76974	30	20
GO:0019899	enzyme binding	molecular_function	0.80306	1	50	15527	268	76974	30	20
GO:0034061	DNA polymerase activity	molecular_function	0.85387	1	53	15527	293	76974	30	23
GO:0046486	glycerolipid metabolic process	biological_process	0.9576	1	46	15527	289	76974	30	16
GO:0006325	chromatin organization	biological_process	0.97676	1	55	15527	351	76974	30	25
GO:0048869	cellular developmental process	biological_process	0.98479	1	54	15527	345	76974	30	24
GO:0009127	purine nucleoside monophosphate biosynthetic process	biological_process	0.99081	1	45	15527	310	76974	30	15
GO:0009168	purine ribonucleoside monophosphate biosynthetic process	biological_process	0.99081	1	45	15527	310	76974	30	15
GO:0009156	ribonucleoside monophosphate biosynthetic process	biological_process	0.99419	1	45	15527	317	76974	30	15
GO:0009124	nucleoside monophosphate biosynthetic process	biological_process	0.99462	1	45	15527	318	76974	30	15
GO:0051301	cell division	biological_process	0.99951	1	54	15527	391	76974	30	24
GO:0016628	oxidoreductase activity, acting on the CH-CH group of donors, NAD or NADP as acceptor	molecular_function	0.081517	0.8983	62	15527	262	76974	29	33
GO:0042558	pteridine-containing compound metabolic process	biological_process	0.085589	0.91974	40	15527	162	76974	29	11
GO:0030684	preribosome	cellular_component	0.30249	1	54	15527	248	76974	29	25
GO:0009719	response to endogenous stimulus	biological_process	0.34625	1	46	15527	219	76974	29	17
GO:0016765	transferase activity, transferring alkyl or aryl (other than methyl) groups	molecular_function	0.36872	1	46	15527	213	76974	29	17
GO:0048285	organelle fission	biological_process	0.48126	1	49	15527	245	76974	29	20
GO:0006913	nucleocytoplasmic transport	biological_process	0.71033	1	52	15527	273	76974	29	23
GO:0010506	regulation of autophagy	biological_process	0.73407	1	49	15527	258	76974	29	20
GO:0051169	nuclear transport	biological_process	0.7505	1	52	15527	277	76974	29	23
GO:0016759	cellulose synthase activity	molecular_function	0.76063	1	52	15527	270	76974	29	23
GO:0016760	cellulose synthase (UDP-forming) activity	molecular_function	0.76063	1	52	15527	270	76974	29	23
GO:0042157	lipoprotein metabolic process	biological_process	0.78213	1	49	15527	275	76974	29	20
GO:0031226	intrinsic component of plasma membrane	cellular_component	0.84544	1	31	15527	183	76974	29	2
GO:0031325	positive regulation of cellular metabolic process	biological_process	0.99595	1	50	15527	339	76974	29	21
GO:0016838	carbon-oxygen lyase activity, acting on phosphates	molecular_function	1.93e-05	0.002156	75	15527	232	76974	28	47
GO:0009066	aspartate family amino acid metabolic process	biological_process	0.053817	0.70201	56	15527	226	76974	28	28
GO:0015925	galactosidase activity	molecular_function	0.13005	1	32	15527	128	76974	28	4
GO:0004521	endoribonuclease activity	molecular_function	0.19282	1	46	15527	203	76974	28	18
GO:0000280	nuclear division	biological_process	0.24041	1	47	15527	211	76974	28	19
GO:0030674	protein binding, bridging	molecular_function	0.25144	1	48	15527	215	76974	28	20
GO:0060090	binding, bridging	molecular_function	0.25144	1	48	15527	215	76974	28	20
GO:0009725	response to hormone	biological_process	0.30408	1	45	15527	211	76974	28	17
GO:0005815	microtubule organizing center	cellular_component	0.36666	1	45	15527	207	76974	28	17
GO:0016597	amino acid binding	molecular_function	0.38675	1	48	15527	224	76974	28	20
GO:0031406	carboxylic acid binding	molecular_function	0.45068	1	48	15527	229	76974	28	20
GO:0043177	organic acid binding	molecular_function	0.45068	1	48	15527	229	76974	28	20
GO:0005057	receptor signaling protein activity	molecular_function	0.4733	1	51	15527	243	76974	28	23
GO:0005819	spindle	cellular_component	0.5035	1	49	15527	238	76974	28	21
GO:0004803	transposase activity	molecular_function	0.7131	1	39	15527	202	76974	28	11
GO:0070840	dynein complex binding	molecular_function	0.71975	1	49	15527	257	76974	28	21
GO:0048870	cell motility	biological_process	0.75076	1	53	15527	281	76974	28	25
GO:0051674	localization of cell	biological_process	0.75076	1	53	15527	281	76974	28	25
GO:0044431	Golgi apparatus part	cellular_component	0.97955	1	47	15527	298	76974	28	19
GO:0009890	negative regulation of biosynthetic process	biological_process	2.68e-05	0.002622	56	15527	163	76974	27	29
GO:0010558	negative regulation of macromolecule biosynthetic process	biological_process	3.73e-05	0.003114	55	15527	161	76974	27	28
GO:0031327	negative regulation of cellular biosynthetic process	biological_process	3.73e-05	0.003114	55	15527	161	76974	27	28
GO:0051172	negative regulation of nitrogen compound metabolic process	biological_process	3.73e-05	0.003114	55	15527	161	76974	27	28
GO:2000113	negative regulation of cellular macromolecule biosynthetic process	biological_process	3.73e-05	0.003114	55	15527	161	76974	27	28
GO:0006720	isoprenoid metabolic process	biological_process	0.000834	0.04165	50	15527	161	76974	27	23
GO:0051259	protein oligomerization	biological_process	0.013247	0.31261	45	15527	162	76974	27	18
GO:0016151	nickel cation binding	molecular_function	0.016702	0.35652	39	15527	140	76974	27	12
GO:0016579	protein deubiquitination	biological_process	0.04119	0.57913	56	15527	215	76974	27	29
GO:0070646	protein modification by small protein removal	biological_process	0.04119	0.57913	56	15527	215	76974	27	29
GO:0004127	cytidylate kinase activity	molecular_function	0.045814	0.63278	33	15527	120	76974	27	6
GO:0033178	proton-transporting two-sector ATPase complex, catalytic domain	cellular_component	0.27917	1	47	15527	218	76974	27	20
GO:0004673	protein histidine kinase activity	molecular_function	0.56596	1	52	15527	257	76974	27	25
GO:0016775	phosphotransferase activity, nitrogenous group as acceptor	molecular_function	0.56596	1	52	15527	257	76974	27	25
GO:0016667	oxidoreductase activity, acting on a sulfur group of donors	molecular_function	0.67401	1	36	15527	204	76974	27	9
GO:0034508	centromere complex assembly	biological_process	0.7137	1	37	15527	200	76974	27	10
GO:0000226	microtubule cytoskeleton organization	biological_process	0.79151	1	53	15527	285	76974	27	26
GO:0005507	copper ion binding	molecular_function	0.88301	1	56	15527	318	76974	27	29
GO:0072509	divalent inorganic cation transmembrane transporter activity	molecular_function	0.93105	1	38	15527	233	76974	27	11
GO:0015276	ligand-gated ion channel activity	molecular_function	0.95716	1	36	15527	229	76974	27	9
GO:0022834	ligand-gated channel activity	molecular_function	0.95716	1	36	15527	229	76974	27	9
GO:0022610	biological adhesion	biological_process	0.95769	1	52	15527	314	76974	27	25
GO:0007059	chromosome segregation	biological_process	0.97608	1	51	15527	320	76974	27	24
GO:0015936	coenzyme A metabolic process	biological_process	0.012035	0.29283	38	15527	131	76974	26	12
GO:0015947	methane metabolic process	biological_process	0.016576	0.35543	37	15527	130	76974	26	11
GO:0043446	cellular alkane metabolic process	biological_process	0.016576	0.35543	37	15527	130	76974	26	11
GO:1901681	sulfur compound binding	molecular_function	0.0222	0.42552	49	15527	183	76974	26	23
GO:0009654	photosystem II oxygen evolving complex	cellular_component	0.033599	0.52975	37	15527	154	76974	26	11
GO:0042559	pteridine-containing compound biosynthetic process	biological_process	0.06428	0.77201	37	15527	144	76974	26	11
GO:0016646	oxidoreductase activity, acting on the CH-NH group of donors, NAD or NADP as acceptor	molecular_function	0.12246	1	36	15527	146	76974	26	10
GO:0006413	translational initiation	biological_process	0.18162	1	33	15527	144	76974	26	7
GO:0042651	thylakoid membrane	cellular_component	0.24278	1	37	15527	182	76974	26	11
GO:0032040	small-subunit processome	cellular_component	0.24668	1	48	15527	214	76974	26	22
GO:0044282	small molecule catabolic process	biological_process	0.401	1	35	15527	163	76974	26	9
GO:0016796	exonuclease activity, active with either ribo- or deoxyribonucleic acids and producing 5'-phosphomonoesters	molecular_function	0.53804	1	43	15527	217	76974	26	17
GO:0000375	RNA splicing, via transesterification reactions	biological_process	0.67571	1	37	15527	197	76974	26	11
GO:0065009	regulation of molecular function	biological_process	0.84182	1	39	15527	224	76974	26	13
GO:0007005	mitochondrion organization	biological_process	0.84268	1	42	15527	239	76974	26	16
GO:0005741	mitochondrial outer membrane	cellular_component	0.87517	1	41	15527	240	76974	26	15
GO:0031968	organelle outer membrane	cellular_component	0.87517	1	41	15527	240	76974	26	15
GO:0006865	amino acid transport	biological_process	0.95388	1	41	15527	254	76974	26	15
GO:0007155	cell adhesion	biological_process	0.96761	1	49	15527	302	76974	26	23
GO:0016879	ligase activity, forming carbon-nitrogen bonds	molecular_function	0.98936	1	41	15527	269	76974	26	15
GO:0061695	transferase complex, transferring phosphorus-containing groups	cellular_component	1	1	51	15527	441	76974	26	25
GO:0003697	single-stranded DNA binding	molecular_function	0.000227	0.014783	29	15527	75	76974	25	4
GO:0009067	aspartate family amino acid biosynthetic process	biological_process	0.008882	0.23302	52	15527	189	76974	25	27
GO:0015948	methanogenesis	biological_process	0.023976	0.42943	36	15527	129	76974	25	11
GO:0015975	energy derivation by oxidation of reduced inorganic compounds	biological_process	0.023976	0.42943	36	15527	129	76974	25	11
GO:0043447	alkane biosynthetic process	biological_process	0.023976	0.42943	36	15527	129	76974	25	11
GO:0009061	anaerobic respiration	biological_process	0.026155	0.44991	36	15527	130	76974	25	11
GO:0019842	vitamin binding	molecular_function	0.070655	0.81723	42	15527	164	76974	25	17
GO:0006096	glycolytic process	biological_process	0.12302	1	51	15527	215	76974	25	26
GO:0006757	ATP generation from ADP	biological_process	0.12302	1	51	15527	215	76974	25	26
GO:0009135	purine nucleoside diphosphate metabolic process	biological_process	0.12302	1	51	15527	215	76974	25	26
GO:0009179	purine ribonucleoside diphosphate metabolic process	biological_process	0.12302	1	51	15527	215	76974	25	26
GO:0009185	ribonucleoside diphosphate metabolic process	biological_process	0.12302	1	51	15527	215	76974	25	26
GO:0046031	ADP metabolic process	biological_process	0.12302	1	51	15527	215	76974	25	26
GO:0006090	pyruvate metabolic process	biological_process	0.14546	1	51	15527	218	76974	25	26
GO:0072511	divalent inorganic cation transport	biological_process	0.22066	1	40	15527	176	76974	25	15
GO:0006855	drug transmembrane transport	biological_process	0.25707	1	43	15527	189	76974	25	18
GO:0015238	drug transmembrane transporter activity	molecular_function	0.25707	1	43	15527	189	76974	25	18
GO:0015893	drug transport	biological_process	0.25707	1	43	15527	189	76974	25	18
GO:0090484	drug transporter activity	molecular_function	0.25707	1	43	15527	189	76974	25	18
GO:0006760	folic acid-containing compound metabolic process	biological_process	0.27451	1	34	15527	151	76974	25	9
GO:0042493	response to drug	biological_process	0.28259	1	43	15527	191	76974	25	18
GO:0006165	nucleoside diphosphate phosphorylation	biological_process	0.30292	1	52	15527	241	76974	25	27
GO:0009132	nucleoside diphosphate metabolic process	biological_process	0.30292	1	52	15527	241	76974	25	27
GO:0046939	nucleotide phosphorylation	biological_process	0.30292	1	52	15527	241	76974	25	27
GO:0008219	cell death	biological_process	0.30452	1	39	15527	178	76974	25	14
GO:0016265	death	biological_process	0.30452	1	39	15527	178	76974	25	14
GO:0006606	protein import into nucleus	biological_process	0.42655	1	46	15527	219	76974	25	21
GO:0034504	protein localization to nucleus	biological_process	0.42655	1	46	15527	219	76974	25	21
GO:0044744	protein targeting to nucleus	biological_process	0.42655	1	46	15527	219	76974	25	21
GO:0051170	nuclear import	biological_process	0.42655	1	46	15527	219	76974	25	21
GO:1902593	single-organism nuclear import	biological_process	0.42655	1	46	15527	219	76974	25	21
GO:0004536	deoxyribonuclease activity	molecular_function	0.50288	1	40	15527	199	76974	25	15
GO:0016638	oxidoreductase activity, acting on the CH-NH2 group of donors	molecular_function	0.52685	1	50	15527	247	76974	25	25
GO:0034655	nucleobase-containing compound catabolic process	biological_process	0.61824	1	37	15527	190	76974	25	12
GO:0051382	kinetochore assembly	biological_process	0.6933	1	35	15527	186	76974	25	10
GO:0051383	kinetochore organization	biological_process	0.6933	1	35	15527	186	76974	25	10
GO:0005887	integral component of plasma membrane	cellular_component	0.93217	1	27	15527	174	76974	25	2
GO:0016568	chromatin modification	biological_process	0.96634	1	47	15527	298	76974	25	22
GO:0016684	oxidoreductase activity, acting on peroxide as acceptor	molecular_function	0.97175	1	38	15527	254	76974	25	13
GO:0009653	anatomical structure morphogenesis	biological_process	0.99757	1	42	15527	304	76974	25	17
GO:0016620	oxidoreductase activity, acting on the aldehyde or oxo group of donors, NAD or NADP as acceptor	molecular_function	1.25e-05	0.001436	60	15527	180	76974	24	36
GO:0045934	negative regulation of nucleobase-containing compound metabolic process	biological_process	8.32e-05	0.006103	49	15527	143	76974	24	25
GO:0008299	isoprenoid biosynthetic process	biological_process	0.000932	0.044039	47	15527	149	76974	24	23
GO:0016868	intramolecular transferase activity, phosphotransferases	molecular_function	0.014304	0.33089	33	15527	114	76974	24	9
GO:0008374	O-acyltransferase activity	molecular_function	0.015069	0.33756	39	15527	139	76974	24	15
GO:0015937	coenzyme A biosynthetic process	biological_process	0.029555	0.47858	34	15527	122	76974	24	10
GO:0033866	nucleoside bisphosphate biosynthetic process	biological_process	0.029555	0.47858	34	15527	122	76974	24	10
GO:0034030	ribonucleoside bisphosphate biosynthetic process	biological_process	0.029555	0.47858	34	15527	122	76974	24	10
GO:0034033	purine nucleoside bisphosphate biosynthetic process	biological_process	0.029555	0.47858	34	15527	122	76974	24	10
GO:0000794	condensed nuclear chromosome	cellular_component	0.072389	0.83318	40	15527	159	76974	24	16
GO:0000502	proteasome complex	cellular_component	0.16951	1	36	15527	162	76974	24	12
GO:0016877	ligase activity, forming carbon-sulfur bonds	molecular_function	0.24002	1	36	15527	155	76974	24	12
GO:0008173	RNA methyltransferase activity	molecular_function	0.29813	1	43	15527	197	76974	24	19
GO:0006915	apoptotic process	biological_process	0.3858	1	37	15527	174	76974	24	13
GO:0012501	programmed cell death	biological_process	0.3858	1	37	15527	174	76974	24	13
GO:0009110	vitamin biosynthetic process	biological_process	0.58063	1	42	15527	214	76974	24	18
GO:0042364	water-soluble vitamin biosynthetic process	biological_process	0.58063	1	42	15527	214	76974	24	18
GO:0006766	vitamin metabolic process	biological_process	0.62014	1	42	15527	217	76974	24	18
GO:0006767	water-soluble vitamin metabolic process	biological_process	0.62014	1	42	15527	217	76974	24	18
GO:0030695	GTPase regulator activity	molecular_function	0.64019	1	39	15527	198	76974	24	15
GO:0023051	regulation of signaling	biological_process	0.66675	1	32	15527	167	76974	24	8
GO:0098800	inner mitochondrial membrane protein complex	cellular_component	0.67078	1	41	15527	228	76974	24	17
GO:0015629	actin cytoskeleton	cellular_component	0.85417	1	42	15527	235	76974	24	18
GO:0004601	peroxidase activity	molecular_function	0.96743	1	37	15527	246	76974	24	13
GO:0006650	glycerophospholipid metabolic process	biological_process	0.99699	1	36	15527	268	76974	24	12
GO:0005544	calcium-dependent phospholipid binding	molecular_function	1.01e-05	0.001189	25	15527	54	76974	23	2
GO:0007166	cell surface receptor signaling pathway	biological_process	0.014739	0.336	31	15527	111	76974	23	8
GO:0008641	small protein activating enzyme activity	molecular_function	0.22393	1	35	15527	149	76974	23	12
GO:0016893	endonuclease activity, active with either ribo- or deoxyribonucleic acids and producing 5'-phosphomonoesters	molecular_function	0.47716	1	42	15527	206	76974	23	19
GO:0009966	regulation of signal transduction	biological_process	0.68005	1	31	15527	163	76974	23	8
GO:0010646	regulation of cell communication	biological_process	0.70822	1	31	15527	165	76974	23	8
GO:0043207	response to external biotic stimulus	biological_process	0.99989	1	36	15527	327	76974	23	13
GO:0051707	response to other organism	biological_process	0.99989	1	36	15527	327	76974	23	13
GO:0045892	negative regulation of transcription, DNA-templated	biological_process	0.000378	0.021898	45	15527	136	76974	22	23
GO:0051253	negative regulation of RNA metabolic process	biological_process	0.000378	0.021898	45	15527	136	76974	22	23
GO:1902679	negative regulation of RNA biosynthetic process	biological_process	0.000378	0.021898	45	15527	136	76974	22	23
GO:1903507	negative regulation of nucleic acid-templated transcription	biological_process	0.000378	0.021898	45	15527	136	76974	22	23
GO:0009073	aromatic amino acid family biosynthetic process	biological_process	0.017021	0.35909	32	15527	109	76974	22	10
GO:0030599	pectinesterase activity	molecular_function	0.017694	0.36766	30	15527	100	76974	22	8
GO:0042545	cell wall modification	biological_process	0.017694	0.36766	30	15527	100	76974	22	8
GO:0015994	chlorophyll metabolic process	biological_process	0.054235	0.70201	34	15527	132	76974	22	12
GO:0033180	proton-transporting V-type ATPase, V1 domain	cellular_component	0.20129	1	39	15527	172	76974	22	17
GO:0009396	folic acid-containing compound biosynthetic process	biological_process	0.24742	1	31	15527	134	76974	22	9
GO:0010941	regulation of cell death	biological_process	0.3574	1	33	15527	152	76974	22	11
GO:0042981	regulation of apoptotic process	biological_process	0.3574	1	33	15527	152	76974	22	11
GO:0043067	regulation of programmed cell death	biological_process	0.3574	1	33	15527	152	76974	22	11
GO:0008081	phosphoric diester hydrolase activity	molecular_function	0.45468	1	31	15527	146	76974	22	9
GO:0001775	cell activation	biological_process	0.52104	1	45	15527	222	76974	22	23
GO:0000155	phosphorelay sensor kinase activity	molecular_function	0.6397	1	44	15527	221	76974	22	22
GO:0003777	microtubule motor activity	molecular_function	0.65456	1	35	15527	176	76974	22	13
GO:0007018	microtubule-based movement	biological_process	0.66359	1	35	15527	177	76974	22	13
GO:0050790	regulation of catalytic activity	biological_process	0.91693	1	31	15527	193	76974	22	9
GO:0003887	DNA-directed DNA polymerase activity	molecular_function	0.94571	1	43	15527	259	76974	22	21
GO:0006979	response to oxidative stress	biological_process	0.97229	1	33	15527	235	76974	22	11
GO:0000902	cell morphogenesis	biological_process	0.98275	1	36	15527	239	76974	22	14
GO:0032989	cellular component morphogenesis	biological_process	0.98275	1	36	15527	239	76974	22	14
GO:0031300	intrinsic component of organelle membrane	cellular_component	0.99259	1	33	15527	245	76974	22	11
GO:0031301	integral component of organelle membrane	cellular_component	0.99259	1	33	15527	245	76974	22	11
GO:0051128	regulation of cellular component organization	biological_process	0.99262	1	37	15527	261	76974	22	15
GO:0008654	phospholipid biosynthetic process	biological_process	0.99835	1	40	15527	300	76974	22	18
GO:0006754	ATP biosynthetic process	biological_process	0.99885	1	35	15527	275	76974	22	13
GO:0009142	nucleoside triphosphate biosynthetic process	biological_process	0.99978	1	36	15527	301	76974	22	14
GO:0009145	purine nucleoside triphosphate biosynthetic process	biological_process	0.99978	1	36	15527	301	76974	22	14
GO:0009201	ribonucleoside triphosphate biosynthetic process	biological_process	0.99978	1	36	15527	301	76974	22	14
GO:0009206	purine ribonucleoside triphosphate biosynthetic process	biological_process	0.99978	1	36	15527	301	76974	22	14
GO:0005261	cation channel activity	molecular_function	0.99995	1	24	15527	234	76974	22	2
GO:0031072	heat shock protein binding	molecular_function	0.029852	0.48009	28	15527	100	76974	21	7
GO:0015996	chlorophyll catabolic process	biological_process	0.035229	0.54064	33	15527	123	76974	21	12
GO:0047746	chlorophyllase activity	molecular_function	0.035229	0.54064	33	15527	123	76974	21	12
GO:0030976	thiamine pyrophosphate binding	molecular_function	0.036407	0.55508	36	15527	130	76974	21	15
GO:0046149	pigment catabolic process	biological_process	0.042477	0.59367	33	15527	125	76974	21	12
GO:0006787	porphyrin-containing compound catabolic process	biological_process	0.075569	0.85512	33	15527	131	76974	21	12
GO:0033015	tetrapyrrole catabolic process	biological_process	0.075569	0.85512	33	15527	131	76974	21	12
GO:0051187	cofactor catabolic process	biological_process	0.082606	0.8983	33	15527	132	76974	21	12
GO:0004488	methylenetetrahydrofolate dehydrogenase (NADP+) activity	molecular_function	0.11951	1	29	15527	115	76974	21	8
GO:0005516	calmodulin binding	molecular_function	0.15858	1	34	15527	138	76974	21	13
GO:0003916	DNA topoisomerase activity	molecular_function	0.16079	1	29	15527	118	76974	21	8
GO:0005577	fibrinogen complex	cellular_component	0.41503	1	41	15527	194	76974	21	20
GO:0030168	platelet activation	biological_process	0.41503	1	41	15527	194	76974	21	20
GO:0009064	glutamine family amino acid metabolic process	biological_process	0.45324	1	42	15527	202	76974	21	21
GO:0016054	organic acid catabolic process	biological_process	0.5074	1	30	15527	145	76974	21	9
GO:0046395	carboxylic acid catabolic process	biological_process	0.5074	1	30	15527	145	76974	21	9
GO:0007596	blood coagulation	biological_process	0.51616	1	41	15527	201	76974	21	20
GO:0007599	hemostasis	biological_process	0.51616	1	41	15527	201	76974	21	20
GO:0050817	coagulation	biological_process	0.51616	1	41	15527	201	76974	21	20
GO:0050878	regulation of body fluid levels	biological_process	0.51616	1	41	15527	201	76974	21	20
GO:0042060	wound healing	biological_process	0.55666	1	43	15527	214	76974	21	22
GO:0008047	enzyme activator activity	molecular_function	0.57453	1	34	15527	168	76974	21	13
GO:0009611	response to wounding	biological_process	0.5968	1	43	15527	218	76974	21	22
GO:0061630	ubiquitin protein ligase activity	molecular_function	0.63034	1	35	15527	177	76974	21	14
GO:0061659	ubiquitin-like protein ligase activity	molecular_function	0.63034	1	35	15527	177	76974	21	14
GO:0098813	nuclear chromosome segregation	biological_process	0.71174	1	41	15527	218	76974	21	20
GO:0000377	RNA splicing, via transesterification reactions with bulged adenosine as nucleophile	biological_process	0.77765	1	28	15527	160	76974	21	7
GO:0000398	mRNA splicing, via spliceosome	biological_process	0.77765	1	28	15527	160	76974	21	7
GO:0008408	3'-5' exonuclease activity	molecular_function	0.80744	1	34	15527	189	76974	21	13
GO:0045017	glycerolipid biosynthetic process	biological_process	0.87765	1	32	15527	196	76974	21	11
GO:0002376	immune system process	biological_process	0.89271	1	38	15527	223	76974	21	17
GO:0003333	amino acid transmembrane transport	biological_process	0.9465	1	36	15527	222	76974	21	15
GO:1903825	organic acid transmembrane transport	biological_process	0.95669	1	36	15527	226	76974	21	15
GO:0098656	anion transmembrane transport	biological_process	0.95961	1	36	15527	227	76974	21	15
GO:0015079	potassium ion transmembrane transporter activity	molecular_function	0.97571	1	31	15527	204	76974	21	10
GO:0019954	asexual reproduction	biological_process	0.9913	1	36	15527	258	76974	21	15
GO:0046488	phosphatidylinositol metabolic process	biological_process	0.994	1	32	15527	237	76974	21	11
GO:0015985	energy coupled proton transport, down electrochemical gradient	biological_process	0.99796	1	34	15527	263	76974	21	13
GO:0015986	ATP synthesis coupled proton transport	biological_process	0.99796	1	34	15527	263	76974	21	13
GO:0000428	DNA-directed RNA polymerase complex	cellular_component	0.99994	1	41	15527	341	76974	21	20
GO:0030880	RNA polymerase complex	cellular_component	0.99994	1	41	15527	341	76974	21	20
GO:0055029	nuclear DNA-directed RNA polymerase complex	cellular_component	0.99994	1	41	15527	341	76974	21	20
GO:0006721	terpenoid metabolic process	biological_process	0.001835	0.07363	34	15527	102	76974	20	14
GO:0016114	terpenoid biosynthetic process	biological_process	0.001835	0.07363	34	15527	102	76974	20	14
GO:0051321	meiotic cell cycle	biological_process	0.002203	0.083248	31	15527	93	76974	20	11
GO:0070566	adenylyltransferase activity	molecular_function	0.002306	0.083934	34	15527	103	76974	20	14
GO:0051539	4 iron, 4 sulfur cluster binding	molecular_function	0.002772	0.095002	25	15527	71	76974	20	5
GO:0016042	lipid catabolic process	biological_process	0.088659	0.9461	27	15527	102	76974	20	7
GO:0006479	protein methylation	biological_process	0.541	1	33	15527	163	76974	20	13
GO:0008213	protein alkylation	biological_process	0.541	1	33	15527	163	76974	20	13
GO:0016311	dephosphorylation	biological_process	0.6229	1	34	15527	174	76974	20	14
GO:0006869	lipid transport	biological_process	0.71094	1	36	15527	196	76974	20	16
GO:0009896	positive regulation of catabolic process	biological_process	0.83696	1	37	15527	207	76974	20	17
GO:0010508	positive regulation of autophagy	biological_process	0.83696	1	37	15527	207	76974	20	17
GO:0031331	positive regulation of cellular catabolic process	biological_process	0.83696	1	37	15527	207	76974	20	17
GO:0010876	lipid localization	biological_process	0.85261	1	36	15527	210	76974	20	16
GO:0005244	voltage-gated ion channel activity	molecular_function	0.89803	1	27	15527	161	76974	20	7
GO:0022832	voltage-gated channel activity	molecular_function	0.89803	1	27	15527	161	76974	20	7
GO:1903509	liposaccharide metabolic process	biological_process	0.94002	1	31	15527	203	76974	20	11
GO:0051701	interaction with host	biological_process	1	1	32	15527	340	76974	20	12
GO:0006553	lysine metabolic process	biological_process	0.026553	0.45509	40	15527	150	76974	19	21
GO:0043631	RNA polyadenylation	biological_process	0.040533	0.57679	25	15527	86	76974	19	6
GO:0030258	lipid modification	biological_process	0.089735	0.9461	35	15527	138	76974	19	16
GO:0052646	alditol phosphate metabolic process	biological_process	0.16414	1	32	15527	132	76974	19	13
GO:0070838	divalent metal ion transport	biological_process	0.35641	1	34	15527	157	76974	19	15
GO:0016790	thiolester hydrolase activity	molecular_function	0.37999	1	29	15527	135	76974	19	10
GO:0001510	RNA methylation	biological_process	0.39632	1	27	15527	126	76974	19	8
GO:0004721	phosphoprotein phosphatase activity	molecular_function	0.41564	1	34	15527	160	76974	19	15
GO:0006470	protein dephosphorylation	biological_process	0.61035	1	32	15527	163	76974	19	13
GO:0022900	electron transport chain	biological_process	0.64183	1	34	15527	183	76974	19	15
GO:0031514	motile cilium	cellular_component	0.81128	1	35	15527	192	76974	19	16
GO:0005929	cilium	cellular_component	0.83321	1	35	15527	195	76974	19	16
GO:0010256	endomembrane system organization	biological_process	0.89315	1	30	15527	180	76974	19	11
GO:0016591	DNA-directed RNA polymerase II, holoenzyme	cellular_component	0.99834	1	38	15527	282	76974	19	19
GO:0010333	terpene synthase activity	molecular_function	0.000293	0.018316	65	15527	210	76974	18	47
GO:0016762	xyloglucan:xyloglucosyl transferase activity	molecular_function	0.005121	0.1582	19	15527	56	76974	18	1
GO:0048046	apoplast	cellular_component	0.005121	0.1582	19	15527	56	76974	18	1
GO:0016709	oxidoreductase activity, acting on paired donors, with incorporation or reduction of molecular oxygen, NAD(P)H as one donor, and incorporation of one atom of oxygen	molecular_function	0.043897	0.61169	35	15527	129	76974	18	17
GO:0006265	DNA topological change	biological_process	0.06391	0.76954	26	15527	95	76974	18	8
GO:0003993	acid phosphatase activity	molecular_function	0.35879	1	24	15527	106	76974	18	6
GO:0005839	proteasome core complex	cellular_component	0.37571	1	26	15527	129	76974	18	8
GO:0046148	pigment biosynthetic process	biological_process	0.37651	1	40	15527	186	76974	18	22
GO:0009341	beta-galactosidase complex	cellular_component	0.38669	1	21	15527	94	76974	18	3
GO:0000272	polysaccharide catabolic process	biological_process	0.39934	1	29	15527	137	76974	18	11
GO:0004565	beta-galactosidase activity	molecular_function	0.49701	1	21	15527	100	76974	18	3
GO:0022406	membrane docking	biological_process	0.59918	1	28	15527	142	76974	18	10
GO:0050661	NADP binding	molecular_function	0.6546	1	31	15527	159	76974	18	13
GO:0006779	porphyrin-containing compound biosynthetic process	biological_process	0.65686	1	40	15527	206	76974	18	22
GO:0015035	protein disulfide oxidoreductase activity	molecular_function	0.75215	1	22	15527	134	76974	18	4
GO:0015036	disulfide oxidoreductase activity	molecular_function	0.75215	1	22	15527	134	76974	18	4
GO:0071804	cellular potassium ion transport	biological_process	0.77128	1	28	15527	152	76974	18	10
GO:0071805	potassium ion transmembrane transport	biological_process	0.77128	1	28	15527	152	76974	18	10
GO:0006006	glucose metabolic process	biological_process	0.96918	1	25	15527	165	76974	18	7
GO:0006643	membrane lipid metabolic process	biological_process	0.97406	1	29	15527	204	76974	18	11
GO:0008514	organic anion transmembrane transporter activity	molecular_function	0.99686	1	30	15527	230	76974	18	12
GO:1901136	carbohydrate derivative catabolic process	biological_process	0.18245	1	37	15527	160	76974	17	20
GO:0008855	exodeoxyribonuclease VII activity	molecular_function	0.19626	1	27	15527	115	76974	17	10
GO:0019208	phosphatase regulator activity	molecular_function	0.21592	1	29	15527	122	76974	17	12
GO:0006783	heme biosynthetic process	biological_process	0.21828	1	39	15527	169	76974	17	22
GO:0000221	vacuolar proton-transporting V-type ATPase, V1 domain	cellular_component	0.25792	1	34	15527	153	76974	17	17
GO:0016471	vacuolar proton-transporting V-type ATPase complex	cellular_component	0.25792	1	34	15527	153	76974	17	17
GO:0004529	exodeoxyribonuclease activity	molecular_function	0.26343	1	27	15527	120	76974	17	10
GO:0016895	exodeoxyribonuclease activity, producing 5'-phosphomonoesters	molecular_function	0.26343	1	27	15527	120	76974	17	10
GO:0005774	vacuolar membrane	cellular_component	0.2719	1	34	15527	154	76974	17	17
GO:0044437	vacuolar part	cellular_component	0.2719	1	34	15527	154	76974	17	17
GO:0016891	endoribonuclease activity, producing 5'-phosphomonoesters	molecular_function	0.31524	1	33	15527	150	76974	17	16
GO:0042168	heme metabolic process	biological_process	0.31691	1	39	15527	177	76974	17	22
GO:0005773	vacuole	cellular_component	0.35888	1	34	15527	160	76974	17	17
GO:0048278	vesicle docking	biological_process	0.38882	1	27	15527	122	76974	17	10
GO:0016679	oxidoreductase activity, acting on diphenols and related substances as donors	molecular_function	0.43853	1	24	15527	119	76974	17	7
GO:0044272	sulfur compound biosynthetic process	biological_process	0.49366	1	28	15527	134	76974	17	11
GO:0061025	membrane fusion	biological_process	0.56656	1	28	15527	141	76974	17	11
GO:0008677	2-dehydropantoate 2-reductase activity	molecular_function	0.5892	1	26	15527	130	76974	17	9
GO:0042393	histone binding	molecular_function	0.72839	1	22	15527	117	76974	17	5
GO:0000777	condensed chromosome kinetochore	cellular_component	0.75693	1	29	15527	159	76974	17	12
GO:0000779	condensed chromosome, centromeric region	cellular_component	0.75693	1	29	15527	159	76974	17	12
GO:0006790	sulfur compound metabolic process	biological_process	0.81223	1	31	15527	172	76974	17	14
GO:1901615	organic hydroxy compound metabolic process	biological_process	0.9066	1	26	15527	160	76974	17	9
GO:0016459	myosin complex	cellular_component	0.92465	1	25	15527	153	76974	17	8
GO:0006664	glycolipid metabolic process	biological_process	0.97018	1	27	15527	190	76974	17	10
GO:0009247	glycolipid biosynthetic process	biological_process	0.97018	1	27	15527	190	76974	17	10
GO:0046467	membrane lipid biosynthetic process	biological_process	0.97018	1	27	15527	190	76974	17	10
GO:0005342	organic acid transmembrane transporter activity	molecular_function	0.99511	1	27	15527	208	76974	17	10
GO:0046943	carboxylic acid transmembrane transporter activity	molecular_function	0.99511	1	27	15527	208	76974	17	10
GO:0098797	plasma membrane protein complex	cellular_component	0.99997	1	25	15527	254	76974	17	8
GO:0070206	protein trimerization	biological_process	0.005282	0.16212	27	15527	83	76974	16	11
GO:0008121	ubiquinol-cytochrome-c reductase activity	molecular_function	0.006908	0.19714	21	15527	64	76974	16	5
GO:0016681	oxidoreductase activity, acting on diphenols and related substances as donors, cytochrome as acceptor	molecular_function	0.006908	0.19714	21	15527	64	76974	16	5
GO:0009085	lysine biosynthetic process	biological_process	0.009272	0.23793	36	15527	125	76974	16	20
GO:0009089	lysine biosynthetic process via diaminopimelate	biological_process	0.009272	0.23793	36	15527	125	76974	16	20
GO:0046451	diaminopimelate metabolic process	biological_process	0.009272	0.23793	36	15527	125	76974	16	20
GO:0004576	oligosaccharyl transferase activity	molecular_function	0.018087	0.37252	21	15527	67	76974	16	5
GO:0004764	shikimate 3-dehydrogenase (NADP+) activity	molecular_function	0.032584	0.51932	20	15527	64	76974	16	4
GO:0006072	glycerol-3-phosphate metabolic process	biological_process	0.075261	0.85512	27	15527	101	76974	16	11
GO:0046168	glycerol-3-phosphate catabolic process	biological_process	0.075261	0.85512	27	15527	101	76974	16	11
GO:0004315	3-oxoacyl-[acyl-carrier-protein] synthase activity	molecular_function	0.15644	1	22	15527	86	76974	16	6
GO:0004312	fatty acid synthase activity	molecular_function	0.17098	1	22	15527	87	76974	16	6
GO:0004427	inorganic diphosphatase activity	molecular_function	0.18543	1	29	15527	120	76974	16	13
GO:0032324	molybdopterin cofactor biosynthetic process	biological_process	0.1943	1	27	15527	111	76974	16	11
GO:0043545	molybdopterin cofactor metabolic process	biological_process	0.1943	1	27	15527	111	76974	16	11
GO:0051189	prosthetic group metabolic process	biological_process	0.1943	1	27	15527	111	76974	16	11
GO:0019080	viral gene expression	biological_process	0.25451	1	27	15527	115	76974	16	11
GO:0004725	protein tyrosine phosphatase activity	molecular_function	0.31955	1	26	15527	116	76974	16	10
GO:0006904	vesicle docking involved in exocytosis	biological_process	0.32228	1	25	15527	109	76974	16	9
GO:0044033	multi-organism metabolic process	biological_process	0.38792	1	27	15527	123	76974	16	11
GO:0046434	organophosphate catabolic process	biological_process	0.40173	1	28	15527	130	76974	16	12
GO:0005230	extracellular ligand-gated ion channel activity	molecular_function	0.40595	1	25	15527	115	76974	16	9
GO:0008378	galactosyltransferase activity	molecular_function	0.42186	1	19	15527	87	76974	16	3
GO:0006821	chloride transport	biological_process	0.45702	1	23	15527	107	76974	16	7
GO:0009522	photosystem I	cellular_component	0.49493	1	17	15527	91	76974	16	1
GO:0000413	protein peptidyl-prolyl isomerization	biological_process	0.55552	1	24	15527	130	76974	16	8
GO:0003755	peptidyl-prolyl cis-trans isomerase activity	molecular_function	0.55552	1	24	15527	130	76974	16	8
GO:0016859	cis-trans isomerase activity	molecular_function	0.55552	1	24	15527	130	76974	16	8
GO:0018208	peptidyl-proline modification	biological_process	0.55552	1	24	15527	130	76974	16	8
GO:0009063	cellular amino acid catabolic process	biological_process	0.63759	1	22	15527	113	76974	16	6
GO:0000940	condensed chromosome outer kinetochore	cellular_component	0.71969	1	28	15527	151	76974	16	12
GO:1901606	alpha-amino acid catabolic process	biological_process	0.76028	1	19	15527	105	76974	16	3
GO:0060590	ATPase regulator activity	molecular_function	0.7709	1	22	15527	132	76974	16	6
GO:0006955	immune response	biological_process	0.78534	1	25	15527	141	76974	16	9
GO:0006066	alcohol metabolic process	biological_process	0.78704	1	23	15527	131	76974	16	7
GO:0016407	acetyltransferase activity	molecular_function	0.87929	1	36	15527	218	76974	16	20
GO:0045259	proton-transporting ATP synthase complex	cellular_component	0.90802	1	27	15527	175	76974	16	11
GO:0004197	cysteine-type endopeptidase activity	molecular_function	0.93563	1	26	15527	168	76974	16	10
GO:0016410	N-acyltransferase activity	molecular_function	0.95136	1	35	15527	224	76974	16	19
GO:0000278	mitotic cell cycle	biological_process	0.95409	1	25	15527	164	76974	16	9
GO:1903047	mitotic cell cycle process	biological_process	0.95409	1	25	15527	164	76974	16	9
GO:0004930	G-protein coupled receptor activity	molecular_function	0.98306	1	25	15527	201	76974	16	9
GO:0090575	RNA polymerase II transcription factor complex	cellular_component	0.98508	1	33	15527	225	76974	16	17
GO:0043093	FtsZ-dependent cytokinesis	biological_process	0.98979	1	29	15527	206	76974	16	13
GO:0032505	reproduction of a single-celled organism	biological_process	0.99067	1	29	15527	207	76974	16	13
GO:0044798	nuclear transcription factor complex	cellular_component	0.99278	1	33	15527	238	76974	16	17
GO:0008170	N-methyltransferase activity	molecular_function	0.99488	1	29	15527	229	76974	16	13
GO:0000910	cytokinesis	biological_process	0.996	1	30	15527	222	76974	16	14
GO:0032506	cytokinetic process	biological_process	0.99629	1	29	15527	217	76974	16	13
GO:0090529	cell septum assembly	biological_process	0.99629	1	29	15527	217	76974	16	13
GO:0005667	transcription factor complex	cellular_component	0.99701	1	33	15527	248	76974	16	17
GO:0015931	nucleobase-containing compound transport	biological_process	0.99919	1	22	15527	199	76974	16	6
GO:0016840	carbon-nitrogen lyase activity	molecular_function	0.006058	0.18121	19	15527	54	76974	15	4
GO:0004652	polynucleotide adenylyltransferase activity	molecular_function	0.006927	0.19714	21	15527	59	76974	15	6
GO:0004140	dephospho-CoA kinase activity	molecular_function	0.008267	0.22184	23	15527	70	76974	15	8
GO:0015923	mannosidase activity	molecular_function	0.062789	0.76387	35	15527	131	76974	15	20
GO:0008172	S-methyltransferase activity	molecular_function	0.081702	0.8983	21	15527	77	76974	15	6
GO:0019013	viral nucleocapsid	cellular_component	0.09822	0.97928	24	15527	92	76974	15	9
GO:0016160	amylase activity	molecular_function	0.10614	1	27	15527	103	76974	15	12
GO:0016763	transferase activity, transferring pentosyl groups	molecular_function	0.31736	1	31	15527	139	76974	15	16
GO:0004970	ionotropic glutamate receptor activity	molecular_function	0.38257	1	24	15527	109	76974	15	9
GO:0008066	glutamate receptor activity	molecular_function	0.38257	1	24	15527	109	76974	15	9
GO:0051087	chaperone binding	molecular_function	0.39976	1	21	15527	99	76974	15	6
GO:0005882	intermediate filament	cellular_component	0.43463	1	35	15527	164	76974	15	20
GO:0045111	intermediate filament cytoskeleton	cellular_component	0.43463	1	35	15527	164	76974	15	20
GO:0016854	racemase and epimerase activity	molecular_function	0.43941	1	20	15527	94	76974	15	5
GO:0009236	cobalamin biosynthetic process	biological_process	0.47477	1	21	15527	102	76974	15	6
GO:0009235	cobalamin metabolic process	biological_process	0.5341	1	21	15527	105	76974	15	6
GO:0005096	GTPase activator activity	molecular_function	0.65755	1	26	15527	133	76974	15	11
GO:0005681	spliceosomal complex	cellular_component	0.8035	1	20	15527	118	76974	15	5
GO:0006402	mRNA catabolic process	biological_process	0.83177	1	24	15527	139	76974	15	9
GO:0008276	protein methyltransferase activity	molecular_function	0.83364	1	23	15527	134	76974	15	8
GO:0016651	oxidoreductase activity, acting on NAD(P)H	molecular_function	0.84074	1	24	15527	147	76974	15	9
GO:0006401	RNA catabolic process	biological_process	0.85217	1	24	15527	141	76974	15	9
GO:0015171	amino acid transmembrane transporter activity	molecular_function	0.99104	1	23	15527	172	76974	15	8
GO:0046474	glycerophospholipid biosynthetic process	biological_process	0.99239	1	22	15527	175	76974	15	7
GO:0008643	carbohydrate transport	biological_process	0.99265	1	22	15527	177	76974	15	7
GO:0006367	transcription initiation from RNA polymerase II promoter	biological_process	0.99324	1	33	15527	232	76974	15	18
GO:0055065	metal ion homeostasis	biological_process	0.99324	1	21	15527	172	76974	15	6
GO:0050801	ion homeostasis	biological_process	0.99367	1	21	15527	173	76974	15	6
GO:0055080	cation homeostasis	biological_process	0.99367	1	21	15527	173	76974	15	6
GO:0098771	inorganic ion homeostasis	biological_process	0.99367	1	21	15527	173	76974	15	6
GO:0048878	chemical homeostasis	biological_process	0.99622	1	21	15527	178	76974	15	6
GO:0006403	RNA localization	biological_process	0.99901	1	21	15527	191	76974	15	6
GO:0050657	nucleic acid transport	biological_process	0.99901	1	21	15527	191	76974	15	6
GO:0050658	RNA transport	biological_process	0.99901	1	21	15527	191	76974	15	6
GO:0051236	establishment of RNA localization	biological_process	0.99901	1	21	15527	191	76974	15	6
GO:0007127	meiosis I	biological_process	0.001027	0.047284	24	15527	64	76974	14	10
GO:0007126	meiotic nuclear division	biological_process	0.003399	0.10931	24	15527	69	76974	14	10
GO:1903046	meiotic cell cycle process	biological_process	0.003399	0.10931	24	15527	69	76974	14	10
GO:0009539	photosystem II reaction center	cellular_component	0.040938	0.57904	16	15527	52	76974	14	2
GO:0019684	photosynthesis, light reaction	biological_process	0.094527	0.96312	32	15527	126	76974	14	18
GO:0016298	lipase activity	molecular_function	0.097583	0.97499	18	15527	65	76974	14	4
GO:0019783	ubiquitin-like protein-specific protease activity	molecular_function	0.12567	1	25	15527	98	76974	14	11
GO:0003855	3-dehydroquinate dehydratase activity	molecular_function	0.12764	1	18	15527	66	76974	14	4
GO:0003995	acyl-CoA dehydrogenase activity	molecular_function	0.32645	1	20	15527	86	76974	14	6
GO:0005777	peroxisome	cellular_component	0.33256	1	24	15527	114	76974	14	10
GO:0042579	microbody	cellular_component	0.33256	1	24	15527	114	76974	14	10
GO:0009452	7-methylguanosine RNA capping	biological_process	0.37439	1	21	15527	94	76974	14	7
GO:0036260	RNA capping	biological_process	0.37439	1	21	15527	94	76974	14	7
GO:0019900	kinase binding	molecular_function	0.39439	1	23	15527	107	76974	14	9
GO:0019354	siroheme biosynthetic process	biological_process	0.42129	1	30	15527	141	76974	14	16
GO:0043115	precorrin-2 dehydrogenase activity	molecular_function	0.42129	1	30	15527	141	76974	14	16
GO:0046156	siroheme metabolic process	biological_process	0.42129	1	30	15527	141	76974	14	16
GO:0005247	voltage-gated chloride channel activity	molecular_function	0.5012	1	21	15527	99	76974	14	7
GO:0005253	anion channel activity	molecular_function	0.5012	1	21	15527	99	76974	14	7
GO:0005254	chloride channel activity	molecular_function	0.5012	1	21	15527	99	76974	14	7
GO:0008308	voltage-gated anion channel activity	molecular_function	0.5012	1	21	15527	99	76974	14	7
GO:0015108	chloride transmembrane transporter activity	molecular_function	0.5012	1	21	15527	99	76974	14	7
GO:0005852	eukaryotic translation initiation factor 3 complex	cellular_component	0.62976	1	20	15527	105	76974	14	6
GO:0004611	phosphoenolpyruvate carboxykinase activity	molecular_function	0.65666	1	25	15527	128	76974	14	11
GO:0045263	proton-transporting ATP synthase complex, coupling factor F(o)	cellular_component	0.78037	1	24	15527	144	76974	14	10
GO:0008138	protein tyrosine/serine/threonine phosphatase activity	molecular_function	0.80236	1	23	15527	129	76974	14	9
GO:0008080	N-acetyltransferase activity	molecular_function	0.87196	1	33	15527	198	76974	14	19
GO:0007067	mitotic nuclear division	biological_process	0.89869	1	23	15527	142	76974	14	9
GO:0015144	carbohydrate transmembrane transporter activity	molecular_function	0.92873	1	20	15527	138	76974	14	6
GO:1901476	carbohydrate transporter activity	molecular_function	0.92873	1	20	15527	138	76974	14	6
GO:0015932	nucleobase-containing compound transmembrane transporter activity	molecular_function	0.97493	1	17	15527	135	76974	14	3
GO:0051726	regulation of cell cycle	biological_process	0.98688	1	27	15527	196	76974	14	13
GO:0016569	covalent chromatin modification	biological_process	0.99016	1	26	15527	189	76974	14	12
GO:0016570	histone modification	biological_process	0.99016	1	26	15527	189	76974	14	12
GO:0006873	cellular ion homeostasis	biological_process	0.99215	1	20	15527	164	76974	14	6
GO:0006875	cellular metal ion homeostasis	biological_process	0.99215	1	20	15527	164	76974	14	6
GO:0030003	cellular cation homeostasis	biological_process	0.99215	1	20	15527	164	76974	14	6
GO:0055082	cellular chemical homeostasis	biological_process	0.99215	1	20	15527	164	76974	14	6
GO:0004424	imidazoleglycerol-phosphate dehydratase activity	molecular_function	0.000692	0.035725	14	15527	29	76974	13	1
GO:0019773	proteasome core complex, alpha-subunit complex	cellular_component	0.036567	0.55572	19	15527	67	76974	13	6
GO:0015095	magnesium ion transmembrane transporter activity	molecular_function	0.059097	0.74005	23	15527	81	76974	13	10
GO:0015693	magnesium ion transport	biological_process	0.059097	0.74005	23	15527	81	76974	13	10
GO:0016725	oxidoreductase activity, acting on CH or CH2 groups	molecular_function	0.090843	0.948	17	15527	60	76974	13	4
GO:0019083	viral transcription	biological_process	0.094849	0.96312	23	15527	85	76974	13	10
GO:0004089	carbonate dehydratase activity	molecular_function	0.11845	1	15	15527	57	76974	13	2
GO:0017119	Golgi transport complex	cellular_component	0.14582	1	26	15527	103	76974	13	13
GO:0016703	oxidoreductase activity, acting on single donors with incorporation of molecular oxygen, incorporation of one atom of oxygen (internal monooxygenases or internal mixed function oxidases)	molecular_function	0.15233	1	22	15527	88	76974	13	9
GO:0080134	regulation of response to stress	biological_process	0.15246	1	16	15527	62	76974	13	3
GO:0048731	system development	biological_process	0.23615	1	20	15527	88	76974	13	7
GO:0042546	cell wall biogenesis	biological_process	0.28074	1	15	15527	62	76974	13	2
GO:0009628	response to abiotic stimulus	biological_process	0.31679	1	21	15527	93	76974	13	8
GO:0019888	protein phosphatase regulator activity	molecular_function	0.34534	1	24	15527	107	76974	13	11
GO:0000075	cell cycle checkpoint	biological_process	0.35833	1	20	15527	91	76974	13	7
GO:0006777	Mo-molybdopterin cofactor biosynthetic process	biological_process	0.42786	1	19	15527	87	76974	13	6
GO:0019720	Mo-molybdopterin cofactor metabolic process	biological_process	0.42786	1	19	15527	87	76974	13	6
GO:0006298	mismatch repair	biological_process	0.45879	1	23	15527	107	76974	13	10
GO:0009084	glutamine family amino acid biosynthetic process	biological_process	0.47501	1	25	15527	120	76974	13	12
GO:0019901	protein kinase binding	molecular_function	0.52462	1	21	15527	104	76974	13	8
GO:0008175	tRNA methyltransferase activity	molecular_function	0.52971	1	24	15527	119	76974	13	11
GO:0000785	chromatin	cellular_component	0.7166	1	21	15527	118	76974	13	8
GO:0000778	condensed nuclear chromosome kinetochore	cellular_component	0.75156	1	22	15527	122	76974	13	9
GO:0000780	condensed nuclear chromosome, centromeric region	cellular_component	0.75156	1	22	15527	122	76974	13	9
GO:0000942	condensed nuclear chromosome outer kinetochore	cellular_component	0.75156	1	22	15527	122	76974	13	9
GO:0042729	DASH complex	cellular_component	0.75156	1	22	15527	122	76974	13	9
GO:0000041	transition metal ion transport	biological_process	0.76949	1	19	15527	115	76974	13	6
GO:0018205	peptidyl-lysine modification	biological_process	0.82966	1	20	15527	114	76974	13	7
GO:0000990	transcription factor activity, core RNA polymerase binding	molecular_function	0.84823	1	19	15527	113	76974	13	6
GO:0000996	core DNA-dependent RNA polymerase binding promoter specificity activity	molecular_function	0.84823	1	19	15527	113	76974	13	6
GO:0016987	sigma factor activity	molecular_function	0.84823	1	19	15527	113	76974	13	6
GO:0004177	aminopeptidase activity	molecular_function	0.85854	1	27	15527	154	76974	13	14
GO:0098542	defense response to other organism	biological_process	0.87325	1	22	15527	138	76974	13	9
GO:0022884	macromolecule transmembrane transporter activity	molecular_function	0.89747	1	15	15527	111	76974	13	2
GO:0043161	proteasome-mediated ubiquitin-dependent protein catabolic process	biological_process	0.93841	1	19	15527	124	76974	13	6
GO:0010498	proteasomal protein catabolic process	biological_process	0.94832	1	19	15527	126	76974	13	6
GO:0006323	DNA packaging	biological_process	0.99279	1	20	15527	155	76974	13	7
GO:0005262	calcium channel activity	molecular_function	0.99834	1	14	15527	133	76974	13	1
GO:0015085	calcium ion transmembrane transporter activity	molecular_function	0.99872	1	14	15527	135	76974	13	1
GO:0006814	sodium ion transport	biological_process	0.99934	1	20	15527	188	76974	13	7
GO:0000139	Golgi membrane	cellular_component	0.99948	1	19	15527	170	76974	13	6
GO:0004619	phosphoglycerate mutase activity	molecular_function	0.000343	0.020945	15	15527	32	76974	12	3
GO:0030151	molybdenum ion binding	molecular_function	0.001188	0.052611	23	15527	60	76974	12	11
GO:0007131	reciprocal meiotic recombination	biological_process	0.002247	0.083248	17	15527	42	76974	12	5
GO:0035825	reciprocal DNA recombination	biological_process	0.002247	0.083248	17	15527	42	76974	12	5
GO:0016624	oxidoreductase activity, acting on the aldehyde or oxo group of donors, disulfide as acceptor	molecular_function	0.005791	0.17431	25	15527	74	76974	12	13
GO:0004559	alpha-mannosidase activity	molecular_function	0.018372	0.37511	31	15527	103	76974	12	19
GO:0030259	lipid glycosylation	biological_process	0.024052	0.42943	24	15527	79	76974	12	12
GO:0016161	beta-amylase activity	molecular_function	0.063868	0.76954	23	15527	81	76974	12	11
GO:0006536	glutamate metabolic process	biological_process	0.094539	0.96312	22	15527	83	76974	12	10
GO:0032182	ubiquitin-like protein binding	molecular_function	0.10238	0.99517	22	15527	84	76974	12	10
GO:0070469	respiratory chain	cellular_component	0.17268	1	20	15527	88	76974	12	8
GO:0000922	spindle pole	cellular_component	0.28735	1	21	15527	88	76974	12	9
GO:0006891	intra-Golgi vesicle-mediated transport	biological_process	0.41408	1	24	15527	111	76974	12	12
GO:0004298	threonine-type endopeptidase activity	molecular_function	0.50524	1	19	15527	101	76974	12	7
GO:0070003	threonine-type peptidase activity	molecular_function	0.50524	1	19	15527	101	76974	12	7
GO:0003860	3-hydroxyisobutyryl-CoA hydrolase activity	molecular_function	0.60407	1	16	15527	83	76974	12	4
GO:0016289	CoA hydrolase activity	molecular_function	0.60407	1	16	15527	83	76974	12	4
GO:0046915	transition metal ion transmembrane transporter activity	molecular_function	0.75725	1	18	15527	107	76974	12	6
GO:0030030	cell projection organization	biological_process	0.76353	1	18	15527	107	76974	12	6
GO:0000956	nuclear-transcribed mRNA catabolic process	biological_process	0.77139	1	17	15527	97	76974	12	5
GO:0016860	intramolecular oxidoreductase activity	molecular_function	0.79713	1	17	15527	102	76974	12	5
GO:0000049	tRNA binding	molecular_function	0.82878	1	25	15527	144	76974	12	13
GO:0018995	host	cellular_component	0.83092	1	25	15527	150	76974	12	13
GO:0033643	host cell part	cellular_component	0.83092	1	25	15527	150	76974	12	13
GO:0043657	host cell	cellular_component	0.83092	1	25	15527	150	76974	12	13
GO:0044215	other organism	cellular_component	0.83092	1	25	15527	150	76974	12	13
GO:0044216	other organism cell	cellular_component	0.83092	1	25	15527	150	76974	12	13
GO:0044217	other organism part	cellular_component	0.83092	1	25	15527	150	76974	12	13
GO:0006835	dicarboxylic acid transport	biological_process	0.84772	1	20	15527	126	76974	12	8
GO:0098799	outer mitochondrial membrane protein complex	cellular_component	0.86068	1	16	15527	99	76974	12	4
GO:0008443	phosphofructokinase activity	molecular_function	0.8631	1	21	15527	126	76974	12	9
GO:0006094	gluconeogenesis	biological_process	0.88321	1	18	15527	110	76974	12	6
GO:0019319	hexose biosynthetic process	biological_process	0.88321	1	18	15527	110	76974	12	6
GO:0046364	monosaccharide biosynthetic process	biological_process	0.88321	1	18	15527	110	76974	12	6
GO:0019200	carbohydrate kinase activity	molecular_function	0.88753	1	21	15527	129	76974	12	9
GO:0008375	acetylglucosaminyltransferase activity	molecular_function	0.9405	1	24	15527	151	76974	12	12
GO:0005985	sucrose metabolic process	biological_process	0.95336	1	18	15527	118	76974	12	6
GO:0030176	integral component of endoplasmic reticulum membrane	cellular_component	0.97394	1	17	15527	131	76974	12	5
GO:0031227	intrinsic component of endoplasmic reticulum membrane	cellular_component	0.97394	1	17	15527	131	76974	12	5
GO:0033043	regulation of organelle organization	biological_process	0.97446	1	25	15527	172	76974	12	13
GO:0006497	protein lipidation	biological_process	0.98579	1	18	15527	145	76974	12	6
GO:0006505	GPI anchor metabolic process	biological_process	0.98579	1	18	15527	145	76974	12	6
GO:0006506	GPI anchor biosynthetic process	biological_process	0.98579	1	18	15527	145	76974	12	6
GO:0006661	phosphatidylinositol biosynthetic process	biological_process	0.98579	1	18	15527	145	76974	12	6
GO:0042158	lipoprotein biosynthetic process	biological_process	0.98946	1	18	15527	148	76974	12	6
GO:0006304	DNA modification	biological_process	0.99822	1	16	15527	160	76974	12	4
GO:0006874	cellular calcium ion homeostasis	biological_process	0.99915	1	13	15527	136	76974	12	1
GO:0055074	calcium ion homeostasis	biological_process	0.99915	1	13	15527	136	76974	12	1
GO:0072503	cellular divalent inorganic cation homeostasis	biological_process	0.99915	1	13	15527	136	76974	12	1
GO:0072507	divalent inorganic cation homeostasis	biological_process	0.99915	1	13	15527	136	76974	12	1
GO:0015081	sodium ion transmembrane transporter activity	molecular_function	0.99956	1	18	15527	179	76974	12	6
GO:0007219	Notch signaling pathway	biological_process	0.000222	0.014682	13	15527	24	76974	11	2
GO:0004144	diacylglycerol O-acyltransferase activity	molecular_function	0.000663	0.035004	16	15527	35	76974	11	5
GO:0016411	acylglycerol O-acyltransferase activity	molecular_function	0.000663	0.035004	16	15527	35	76974	11	5
GO:0007205	protein kinase C-activating G-protein coupled receptor signaling pathway	biological_process	0.002003	0.079024	13	15527	28	76974	11	2
GO:0004143	diacylglycerol kinase activity	molecular_function	0.002421	0.086138	14	15527	32	76974	11	3
GO:0051052	regulation of DNA metabolic process	biological_process	0.009774	0.24675	16	15527	44	76974	11	5
GO:0030955	potassium ion binding	molecular_function	0.06965	0.80806	25	15527	90	76974	11	14
GO:0031420	alkali metal ion binding	molecular_function	0.06965	0.80806	25	15527	90	76974	11	14
GO:0016717	oxidoreductase activity, acting on paired donors, with oxidation of a pair of donors resulting in the reduction of molecular oxygen to two molecules of water	molecular_function	0.10453	1	13	15527	45	76974	11	2
GO:0030904	retromer complex	cellular_component	0.1292	1	20	15527	74	76974	11	9
GO:0000723	telomere maintenance	biological_process	0.14832	1	21	15527	80	76974	11	10
GO:0032200	telomere organization	biological_process	0.14832	1	21	15527	80	76974	11	10
GO:0060249	anatomical structure homeostasis	biological_process	0.14832	1	21	15527	80	76974	11	10
GO:0010035	response to inorganic substance	biological_process	0.15983	1	14	15527	56	76974	11	3
GO:0042147	retrograde transport, endosome to Golgi	biological_process	0.22414	1	20	15527	80	76974	11	9
GO:0016197	endosomal transport	biological_process	0.29129	1	21	15527	89	76974	11	10
GO:0043900	regulation of multi-organism process	biological_process	0.33596	1	21	15527	95	76974	11	10
GO:0005801	cis-Golgi network	cellular_component	0.34048	1	18	15527	79	76974	11	7
GO:0000774	adenyl-nucleotide exchange factor activity	molecular_function	0.39967	1	16	15527	74	76974	11	5
GO:0032269	negative regulation of cellular protein metabolic process	biological_process	0.42512	1	20	15527	94	76974	11	9
GO:0051248	negative regulation of protein metabolic process	biological_process	0.42512	1	20	15527	94	76974	11	9
GO:0005231	excitatory extracellular ligand-gated ion channel activity	molecular_function	0.42824	1	17	15527	76	76974	11	6
GO:0009615	response to virus	biological_process	0.50895	1	19	15527	93	76974	11	8
GO:0030983	mismatched DNA binding	molecular_function	0.53045	1	20	15527	96	76974	11	9
GO:0006338	chromatin remodeling	biological_process	0.53908	1	22	15527	114	76974	11	11
GO:0007006	mitochondrial membrane organization	biological_process	0.56681	1	16	15527	79	76974	11	5
GO:0009288	bacterial-type flagellum	cellular_component	0.6126	1	16	15527	84	76974	11	5
GO:0008483	transaminase activity	molecular_function	0.64933	1	12	15527	63	76974	11	1
GO:0016769	transferase activity, transferring nitrogenous groups	molecular_function	0.64933	1	12	15527	63	76974	11	1
GO:0009678	hydrogen-translocating pyrophosphatase activity	molecular_function	0.6831	1	19	15527	98	76974	11	8
GO:1902531	regulation of intracellular signal transduction	biological_process	0.6982	1	14	15527	76	76974	11	3
GO:0004129	cytochrome-c oxidase activity	molecular_function	0.72782	1	17	15527	100	76974	11	6
GO:0016675	oxidoreductase activity, acting on a heme group of donors	molecular_function	0.72782	1	17	15527	100	76974	11	6
GO:0016676	oxidoreductase activity, acting on a heme group of donors, oxygen as acceptor	molecular_function	0.72782	1	17	15527	100	76974	11	6
GO:0005753	mitochondrial proton-transporting ATP synthase complex	cellular_component	0.7707	1	19	15527	114	76974	11	8
GO:0017016	Ras GTPase binding	molecular_function	0.79771	1	18	15527	100	76974	11	7
GO:0031267	small GTPase binding	molecular_function	0.79771	1	18	15527	100	76974	11	7
GO:0051020	GTPase binding	molecular_function	0.79771	1	18	15527	100	76974	11	7
GO:0016832	aldehyde-lyase activity	molecular_function	0.83775	1	15	15527	93	76974	11	4
GO:0030029	actin filament-based process	biological_process	0.85369	1	18	15527	109	76974	11	7
GO:0030036	actin cytoskeleton organization	biological_process	0.85369	1	18	15527	109	76974	11	7
GO:0015002	heme-copper terminal oxidase activity	molecular_function	0.85861	1	17	15527	110	76974	11	6
GO:0030154	cell differentiation	biological_process	0.90543	1	22	15527	144	76974	11	11
GO:0022411	cellular component disassembly	biological_process	0.92545	1	22	15527	142	76974	11	11
GO:0032984	macromolecular complex disassembly	biological_process	0.92545	1	22	15527	142	76974	11	11
GO:0006383	transcription from RNA polymerase III promoter	biological_process	0.99441	1	13	15527	121	76974	11	2
GO:0005217	intracellular ligand-gated ion channel activity	molecular_function	0.99674	1	11	15527	108	76974	11	0
GO:0005218	intracellular ligand-gated calcium channel activity	molecular_function	0.99674	1	11	15527	108	76974	11	0
GO:0005219	ryanodine-sensitive calcium-release channel activity	molecular_function	0.99674	1	11	15527	108	76974	11	0
GO:0015278	calcium-release channel activity	molecular_function	0.99674	1	11	15527	108	76974	11	0
GO:0006308	DNA catabolic process	biological_process	0.000471	0.026347	12	15527	23	76974	10	2
GO:0004579	dolichyl-diphosphooligosaccharide-protein glycotransferase activity	molecular_function	0.007589	0.20607	13	15527	33	76974	10	3
GO:0008649	rRNA methyltransferase activity	molecular_function	0.012521	0.30153	13	15527	34	76974	10	3
GO:0008839	4-hydroxy-tetrahydrodipicolinate reductase	molecular_function	0.014613	0.33566	27	15527	92	76974	10	17
GO:0030145	manganese ion binding	molecular_function	0.017047	0.35909	14	15527	40	76974	10	4
GO:0004557	alpha-galactosidase activity	molecular_function	0.018318	0.37511	11	15527	28	76974	10	1
GO:0019321	pentose metabolic process	biological_process	0.021394	0.42035	11	15527	29	76974	10	1
GO:0019566	arabinose metabolic process	biological_process	0.021394	0.42035	11	15527	29	76974	10	1
GO:0046373	L-arabinose metabolic process	biological_process	0.021394	0.42035	11	15527	29	76974	10	1
GO:0000097	sulfur amino acid biosynthetic process	biological_process	0.024031	0.42943	16	15527	47	76974	10	6
GO:0004506	squalene monooxygenase activity	molecular_function	0.02838	0.47547	18	15527	56	76974	10	8
GO:0046429	4-hydroxy-3-methylbut-2-en-1-yl diphosphate synthase activity	molecular_function	0.037168	0.55587	12	15527	34	76974	10	2
GO:0052592	oxidoreductase activity, acting on CH or CH2 groups, with an iron-sulfur protein as acceptor	molecular_function	0.037168	0.55587	12	15527	34	76974	10	2
GO:0016049	cell growth	biological_process	0.050311	0.66365	11	15527	32	76974	10	1
GO:0046556	alpha-L-arabinofuranosidase activity	molecular_function	0.053144	0.69572	11	15527	33	76974	10	1
GO:0009733	response to auxin	biological_process	0.08067	0.89135	13	15527	53	76974	10	3
GO:0000096	sulfur amino acid metabolic process	biological_process	0.08302	0.8983	19	15527	67	76974	10	9
GO:0006083	acetate metabolic process	biological_process	0.10828	1	15	15527	52	76974	10	5
GO:0031047	gene silencing by RNA	biological_process	0.10853	1	19	15527	69	76974	10	9
GO:0006537	glutamate biosynthetic process	biological_process	0.11625	1	20	15527	76	76974	10	10
GO:0043650	dicarboxylic acid biosynthetic process	biological_process	0.11625	1	20	15527	76	76974	10	10
GO:0015930	glutamate synthase activity	molecular_function	0.12926	1	20	15527	77	76974	10	10
GO:0040007	growth	biological_process	0.14651	1	13	15527	47	76974	10	3
GO:0006487	protein N-linked glycosylation	biological_process	0.15254	1	16	15527	61	76974	10	6
GO:0016458	gene silencing	biological_process	0.18116	1	19	15527	74	76974	10	9
GO:0009664	plant-type cell wall organization	biological_process	0.19588	1	14	15527	57	76974	10	4
GO:0071669	plant-type cell wall organization or biogenesis	biological_process	0.19588	1	14	15527	57	76974	10	4
GO:0016886	ligase activity, forming phosphoric ester bonds	molecular_function	0.24132	1	25	15527	106	76974	10	15
GO:0009967	positive regulation of signal transduction	biological_process	0.31933	1	13	15527	56	76974	10	3
GO:0010647	positive regulation of cell communication	biological_process	0.31933	1	13	15527	56	76974	10	3
GO:0023056	positive regulation of signaling	biological_process	0.31933	1	13	15527	56	76974	10	3
GO:0006570	tyrosine metabolic process	biological_process	0.32962	1	11	15527	46	76974	10	1
GO:1902495	transmembrane transporter complex	cellular_component	0.39615	1	16	15527	78	76974	10	6
GO:1990351	transporter complex	cellular_component	0.39615	1	16	15527	78	76974	10	6
GO:0005234	extracellular-glutamate-gated ion channel activity	molecular_function	0.44554	1	16	15527	72	76974	10	6
GO:0048584	positive regulation of response to stimulus	biological_process	0.48492	1	13	15527	63	76974	10	3
GO:0009069	serine family amino acid metabolic process	biological_process	0.56281	1	14	15527	68	76974	10	4
GO:0016423	tRNA (guanine) methyltransferase activity	molecular_function	0.57293	1	19	15527	95	76974	10	9
GO:0006359	regulation of transcription from RNA polymerase III promoter	biological_process	0.6059	1	11	15527	59	76974	10	1
GO:0030414	peptidase inhibitor activity	molecular_function	0.62006	1	16	15527	90	76974	10	6
GO:0061134	peptidase regulator activity	molecular_function	0.62006	1	16	15527	90	76974	10	6
GO:0044801	single-organism membrane fusion	biological_process	0.62119	1	17	15527	89	76974	10	7
GO:0034453	microtubule anchoring	biological_process	0.63429	1	20	15527	105	76974	10	10
GO:0008608	attachment of spindle microtubules to kinetochore	biological_process	0.6403	1	19	15527	100	76974	10	9
GO:0048284	organelle fusion	biological_process	0.66299	1	16	15527	86	76974	10	6
GO:0006414	translational elongation	biological_process	0.69611	1	16	15527	91	76974	10	6
GO:0043086	negative regulation of catalytic activity	biological_process	0.79039	1	16	15527	96	76974	10	6
GO:0044092	negative regulation of molecular function	biological_process	0.79039	1	16	15527	96	76974	10	6
GO:0033926	glycopeptide alpha-N-acetylgalactosaminidase activity	molecular_function	0.83127	1	11	15527	66	76974	10	1
GO:0044702	single organism reproductive process	biological_process	0.83828	1	16	15527	98	76974	10	6
GO:0016655	oxidoreductase activity, acting on NAD(P)H, quinone or similar compound as acceptor	molecular_function	0.85215	1	14	15527	93	76974	10	4
GO:0033218	amide binding	molecular_function	0.86487	1	13	15527	85	76974	10	3
GO:0071806	protein transmembrane transport	biological_process	0.86928	1	14	15527	91	76974	10	4
GO:0043241	protein complex disassembly	biological_process	0.88871	1	21	15527	131	76974	10	11
GO:0016278	lysine N-methyltransferase activity	molecular_function	0.91616	1	18	15527	115	76974	10	8
GO:0016279	protein-lysine N-methyltransferase activity	molecular_function	0.91616	1	18	15527	115	76974	10	8
GO:0018024	histone-lysine N-methyltransferase activity	molecular_function	0.91616	1	18	15527	115	76974	10	8
GO:0042054	histone methyltransferase activity	molecular_function	0.91616	1	18	15527	115	76974	10	8
GO:0019953	sexual reproduction	biological_process	0.92171	1	16	15527	107	76974	10	6
GO:0000746	conjugation	biological_process	0.95691	1	15	15527	106	76974	10	5
GO:0005635	nuclear envelope	cellular_component	0.97546	1	16	15527	114	76974	10	6
GO:0010604	positive regulation of macromolecule metabolic process	biological_process	0.99923	1	14	15527	137	76974	10	4
GO:0006282	regulation of DNA repair	biological_process	0.002158	0.08308	11	15527	22	76974	9	2
GO:0080135	regulation of cellular response to stress	biological_process	0.002158	0.08308	11	15527	22	76974	9	2
GO:2001020	regulation of response to DNA damage stimulus	biological_process	0.002158	0.08308	11	15527	22	76974	9	2
GO:0000077	DNA damage checkpoint	biological_process	0.025762	0.44477	13	15527	37	76974	9	4
GO:0031570	DNA integrity checkpoint	biological_process	0.025762	0.44477	13	15527	37	76974	9	4
GO:0031225	anchored component of membrane	cellular_component	0.044077	0.61238	9	15527	25	76974	9	0
GO:0016843	amine-lyase activity	molecular_function	0.092781	0.96181	11	15527	37	76974	9	2
GO:0016844	strictosidine synthase activity	molecular_function	0.092781	0.96181	11	15527	37	76974	9	2
GO:0051537	2 iron, 2 sulfur cluster binding	molecular_function	0.17259	1	15	15527	58	76974	9	6
GO:0002097	tRNA wobble base modification	biological_process	0.24995	1	17	15527	70	76974	9	8
GO:0042775	mitochondrial ATP synthesis coupled electron transport	biological_process	0.26416	1	17	15527	76	76974	9	8
GO:0008312	7S RNA binding	molecular_function	0.35338	1	12	15527	55	76974	9	3
GO:0048500	signal recognition particle	cellular_component	0.35338	1	12	15527	55	76974	9	3
GO:0016776	phosphotransferase activity, phosphate group as acceptor	molecular_function	0.38308	1	14	15527	66	76974	9	5
GO:0006119	oxidative phosphorylation	biological_process	0.41199	1	17	15527	83	76974	9	8
GO:0042773	ATP synthesis coupled electron transport	biological_process	0.41199	1	17	15527	83	76974	9	8
GO:0005746	mitochondrial respiratory chain	cellular_component	0.42617	1	14	15527	72	76974	9	5
GO:0022904	respiratory electron transport chain	biological_process	0.42692	1	18	15527	89	76974	9	9
GO:0008287	protein serine/threonine phosphatase complex	cellular_component	0.46447	1	19	15527	89	76974	9	10
GO:1903293	phosphatase complex	cellular_component	0.46447	1	19	15527	89	76974	9	10
GO:0048038	quinone binding	molecular_function	0.47307	1	22	15527	103	76974	9	13
GO:0016272	prefoldin complex	cellular_component	0.47857	1	15	15527	74	76974	9	6
GO:0003729	mRNA binding	molecular_function	0.48193	1	12	15527	57	76974	9	3
GO:0044822	poly(A) RNA binding	molecular_function	0.48193	1	12	15527	57	76974	9	3
GO:0005092	GDP-dissociation inhibitor activity	molecular_function	0.54182	1	13	15527	64	76974	9	4
GO:0004594	pantothenate kinase activity	molecular_function	0.55788	1	11	15527	53	76974	9	2
GO:0006541	glutamine metabolic process	biological_process	0.57394	1	20	15527	100	76974	9	11
GO:0004866	endopeptidase inhibitor activity	molecular_function	0.60839	1	14	15527	79	76974	9	5
GO:0061135	endopeptidase regulator activity	molecular_function	0.60839	1	14	15527	79	76974	9	5
GO:0000276	mitochondrial proton-transporting ATP synthase complex, coupling factor F(o)	cellular_component	0.61347	1	17	15527	94	76974	9	8
GO:0004535	poly(A)-specific ribonuclease activity	molecular_function	0.67563	1	15	15527	82	76974	9	6
GO:0016814	hydrolase activity, acting on carbon-nitrogen (but not peptide) bonds, in cyclic amidines	molecular_function	0.6829	1	13	15527	71	76974	9	4
GO:0004612	phosphoenolpyruvate carboxykinase (ATP) activity	molecular_function	0.72712	1	14	15527	76	76974	9	5
GO:0072686	mitotic spindle	cellular_component	0.73219	1	14	15527	79	76974	9	5
GO:0051130	positive regulation of cellular component organization	biological_process	0.79036	1	14	15527	87	76974	9	5
GO:1901505	carbohydrate derivative transporter activity	molecular_function	0.80106	1	13	15527	79	76974	9	4
GO:0010181	FMN binding	molecular_function	0.80393	1	17	15527	101	76974	9	8
GO:0043624	cellular protein complex disassembly	biological_process	0.8131	1	19	15527	113	76974	9	10
GO:0006839	mitochondrial transport	biological_process	0.8168	1	15	15527	91	76974	9	6
GO:0043015	gamma-tubulin binding	molecular_function	0.8343	1	15	15527	87	76974	9	6
GO:0000175	3'-5'-exoribonuclease activity	molecular_function	0.83675	1	16	15527	97	76974	9	7
GO:0004532	exoribonuclease activity	molecular_function	0.83675	1	16	15527	97	76974	9	7
GO:0016896	exoribonuclease activity, producing 5'-phosphomonoesters	molecular_function	0.83675	1	16	15527	97	76974	9	7
GO:0019207	kinase regulator activity	molecular_function	0.8577	1	13	15527	83	76974	9	4
GO:0007034	vacuolar transport	biological_process	0.86461	1	11	15527	73	76974	9	2
GO:0072527	pyrimidine-containing compound metabolic process	biological_process	0.86781	1	19	15527	118	76974	9	10
GO:0019069	viral capsid assembly	biological_process	0.88065	1	16	15527	99	76974	9	7
GO:0005742	mitochondrial outer membrane translocase complex	cellular_component	0.90541	1	13	15527	86	76974	9	4
GO:0008026	ATP-dependent helicase activity	molecular_function	0.90854	1	21	15527	130	76974	9	12
GO:0070035	purine NTP-dependent helicase activity	molecular_function	0.90854	1	21	15527	130	76974	9	12
GO:0015740	C4-dicarboxylate transport	biological_process	0.9109	1	17	15527	116	76974	9	8
GO:0043021	ribonucleoprotein complex binding	molecular_function	0.92943	1	11	15527	80	76974	9	2
GO:0030162	regulation of proteolysis	biological_process	0.94328	1	13	15527	91	76974	9	4
GO:0008272	sulfate transport	biological_process	0.96252	1	11	15527	82	76974	9	2
GO:0015116	sulfate transmembrane transporter activity	molecular_function	0.96252	1	11	15527	82	76974	9	2
GO:1901682	sulfur compound transmembrane transporter activity	molecular_function	0.96252	1	11	15527	82	76974	9	2
GO:0072348	sulfur compound transport	biological_process	0.96527	1	11	15527	83	76974	9	2
GO:0019068	virion assembly	biological_process	0.97282	1	16	15527	116	76974	9	7
GO:0051028	mRNA transport	biological_process	0.97547	1	14	15527	105	76974	9	5
GO:0030119	AP-type membrane coat adaptor complex	cellular_component	0.97939	1	14	15527	120	76974	9	5
GO:0015298	solute:cation antiporter activity	molecular_function	0.98094	1	27	15527	180	76974	9	18
GO:0015299	solute:proton antiporter activity	molecular_function	0.98094	1	27	15527	180	76974	9	18
GO:0005643	nuclear pore	cellular_component	0.98342	1	13	15527	99	76974	9	4
GO:0070887	cellular response to chemical stimulus	biological_process	0.99203	1	10	15527	98	76974	9	1
GO:0016929	SUMO-specific protease activity	molecular_function	0.007592	0.20607	15	15527	39	76974	8	7
GO:0032183	SUMO binding	molecular_function	0.007592	0.20607	15	15527	39	76974	8	7
GO:0070122	isopeptidase activity	molecular_function	0.007592	0.20607	15	15527	39	76974	8	7
GO:0070138	ubiquitin-like protein-specific isopeptidase activity	molecular_function	0.007592	0.20607	15	15527	39	76974	8	7
GO:0070140	SUMO-specific isopeptidase activity	molecular_function	0.007592	0.20607	15	15527	39	76974	8	7
GO:0004743	pyruvate kinase activity	molecular_function	0.015507	0.34028	22	15527	67	76974	8	14
GO:0003917	DNA topoisomerase type I activity	molecular_function	0.027469	0.46568	12	15527	33	76974	8	4
GO:0009086	methionine biosynthetic process	biological_process	0.034768	0.54063	14	15527	41	76974	8	6
GO:0044450	microtubule organizing center part	cellular_component	0.039635	0.56816	11	15527	31	76974	8	3
GO:0004064	arylesterase activity	molecular_function	0.077608	0.86568	10	15527	31	76974	8	2
GO:0004176	ATP-dependent peptidase activity	molecular_function	0.14438	1	12	15527	42	76974	8	4
GO:0006555	methionine metabolic process	biological_process	0.19889	1	14	15527	53	76974	8	6
GO:0051015	actin filament binding	molecular_function	0.25624	1	8	15527	30	76974	8	0
GO:0018580	nitronate monooxygenase activity	molecular_function	0.26717	1	16	15527	68	76974	8	8
GO:0009538	photosystem I reaction center	cellular_component	0.28435	1	8	15527	38	76974	8	0
GO:0008176	tRNA (guanine-N7-)-methyltransferase activity	molecular_function	0.35731	1	15	15527	66	76974	8	7
GO:0008417	fucosyltransferase activity	molecular_function	0.39513	1	9	15527	38	76974	8	1
GO:0008094	DNA-dependent ATPase activity	molecular_function	0.42098	1	27	15527	127	76974	8	19
GO:0008083	growth factor activity	molecular_function	0.47678	1	14	15527	67	76974	8	6
GO:1901700	response to oxygen-containing compound	biological_process	0.49158	1	10	15527	51	76974	8	2
GO:0009095	aromatic amino acid family biosynthetic process, prephenate pathway	biological_process	0.49885	1	11	15527	52	76974	8	3
GO:0016892	endoribonuclease activity, producing 3'-phosphomonoesters	molecular_function	0.52269	1	9	15527	45	76974	8	1
GO:0016894	endonuclease activity, active with either ribo- or deoxyribonucleic acids and producing 3'-phosphomonoesters	molecular_function	0.52269	1	9	15527	45	76974	8	1
GO:0007276	gamete generation	biological_process	0.53096	1	12	15527	60	76974	8	4
GO:1901068	guanosine-containing compound metabolic process	biological_process	0.54397	1	14	15527	70	76974	8	6
GO:0008053	mitochondrial fusion	biological_process	0.56824	1	13	15527	67	76974	8	5
GO:0016872	intramolecular lyase activity	molecular_function	0.58867	1	19	15527	99	76974	8	11
GO:0052126	movement in host environment	biological_process	0.62166	1	12	15527	62	76974	8	4
GO:0052192	movement in environment of other organism involved in symbiotic interaction	biological_process	0.62166	1	12	15527	62	76974	8	4
GO:0006415	translational termination	biological_process	0.62494	1	16	15527	85	76974	8	8
GO:0016846	carbon-sulfur lyase activity	molecular_function	0.62604	1	12	15527	68	76974	8	4
GO:0032504	multicellular organism reproduction	biological_process	0.65017	1	13	15527	70	76974	8	5
GO:0006544	glycine metabolic process	biological_process	0.66534	1	12	15527	62	76974	8	4
GO:0048609	multicellular organismal reproductive process	biological_process	0.69735	1	12	15527	67	76974	8	4
GO:0005669	transcription factor TFIID complex	cellular_component	0.69952	1	13	15527	73	76974	8	5
GO:0005047	signal recognition particle binding	molecular_function	0.70909	1	10	15527	55	76974	8	2
GO:0042597	periplasmic space	cellular_component	0.71004	1	16	15527	92	76974	8	8
GO:0005337	nucleoside transmembrane transporter activity	molecular_function	0.71214	1	11	15527	62	76974	8	3
GO:0001522	pseudouridine synthesis	biological_process	0.72629	1	15	15527	85	76974	8	7
GO:0016571	histone methylation	biological_process	0.72702	1	14	15527	75	76974	8	6
GO:0018022	peptidyl-lysine methylation	biological_process	0.72702	1	14	15527	75	76974	8	6
GO:0034968	histone lysine methylation	biological_process	0.72702	1	14	15527	75	76974	8	6
GO:0016857	racemase and epimerase activity, acting on carbohydrates and derivatives	molecular_function	0.73671	1	9	15527	52	76974	8	1
GO:0000790	nuclear chromatin	cellular_component	0.75457	1	13	15527	76	76974	8	5
GO:0006626	protein targeting to mitochondrion	biological_process	0.76745	1	13	15527	76	76974	8	5
GO:0003873	6-phosphofructo-2-kinase activity	molecular_function	0.78348	1	12	15527	72	76974	8	4
GO:0006000	fructose metabolic process	biological_process	0.78348	1	12	15527	72	76974	8	4
GO:0033646	host intracellular part	cellular_component	0.79464	1	18	15527	106	76974	8	10
GO:0043656	intracellular region of host	cellular_component	0.79464	1	18	15527	106	76974	8	10
GO:0003746	translation elongation factor activity	molecular_function	0.79636	1	14	15527	86	76974	8	6
GO:0070585	protein localization to mitochondrion	biological_process	0.79887	1	13	15527	78	76974	8	5
GO:0072655	establishment of protein localization to mitochondrion	biological_process	0.79887	1	13	15527	78	76974	8	5
GO:0004520	endodeoxyribonuclease activity	molecular_function	0.82555	1	13	15527	79	76974	8	5
GO:0009507	chloroplast	cellular_component	0.83681	1	15	15527	103	76974	8	7
GO:0009536	plastid	cellular_component	0.83681	1	15	15527	103	76974	8	7
GO:0005730	nucleolus	cellular_component	0.84812	1	19	15527	118	76974	8	11
GO:0003684	damaged DNA binding	molecular_function	0.86424	1	13	15527	80	76974	8	5
GO:0015743	malate transport	biological_process	0.89142	1	14	15527	92	76974	8	6
GO:0003954	NADH dehydrogenase activity	molecular_function	0.90581	1	11	15527	80	76974	8	3
GO:0007030	Golgi organization	biological_process	0.91201	1	16	15527	102	76974	8	8
GO:0005085	guanyl-nucleotide exchange factor activity	molecular_function	0.91938	1	12	15527	79	76974	8	4
GO:0051336	regulation of hydrolase activity	biological_process	0.91977	1	11	15527	78	76974	8	3
GO:0065002	intracellular protein transmembrane transport	biological_process	0.92776	1	12	15527	86	76974	8	4
GO:0008948	oxaloacetate decarboxylase activity	molecular_function	0.9346	1	13	15527	101	76974	8	5
GO:0035725	sodium ion transmembrane transport	biological_process	0.9346	1	13	15527	101	76974	8	5
GO:0071436	sodium ion export	biological_process	0.9346	1	13	15527	101	76974	8	5
GO:0044743	intracellular protein transmembrane import	biological_process	0.94224	1	11	15527	82	76974	8	3
GO:0016881	acid-amino acid ligase activity	molecular_function	0.94481	1	14	15527	94	76974	8	6
GO:0016861	intramolecular oxidoreductase activity, interconverting aldoses and ketoses	molecular_function	0.9562	1	11	15527	84	76974	8	3
GO:0019751	polyol metabolic process	biological_process	0.96131	1	15	15527	105	76974	8	7
GO:0005672	transcription factor TFIIA complex	cellular_component	0.97182	1	21	15527	145	76974	8	13
GO:0031399	regulation of protein modification process	biological_process	0.97446	1	15	15527	114	76974	8	7
GO:0051302	regulation of cell division	biological_process	0.98104	1	13	15527	102	76974	8	5
GO:0003968	RNA-directed RNA polymerase activity	molecular_function	0.98857	1	18	15527	136	76974	8	10
GO:0016157	sucrose synthase activity	molecular_function	0.9933	1	12	15527	100	76974	8	4
GO:0035091	phosphatidylinositol binding	molecular_function	0.99638	1	10	15527	93	76974	8	2
GO:0035821	modification of morphology or physiology of other organism	biological_process	0.99695	1	10	15527	99	76974	8	2
GO:0010628	positive regulation of gene expression	biological_process	0.99814	1	12	15527	117	76974	8	4
GO:0000148	1,3-beta-D-glucan synthase complex	cellular_component	0.99982	1	11	15527	139	76974	8	3
GO:0003843	1,3-beta-D-glucan synthase activity	molecular_function	0.99982	1	11	15527	139	76974	8	3
GO:0006074	(1->3)-beta-D-glucan metabolic process	biological_process	0.99982	1	11	15527	139	76974	8	3
GO:0006075	(1->3)-beta-D-glucan biosynthetic process	biological_process	0.99982	1	11	15527	139	76974	8	3
GO:0046685	response to arsenic-containing substance	biological_process	5.31e-06	0.000712	23	15527	45	76974	7	16
GO:0007423	sensory organ development	biological_process	0.000231	0.014891	9	15527	13	76974	7	2
GO:0046537	2,3-bisphosphoglycerate-independent phosphoglycerate mutase activity	molecular_function	0.008531	0.22634	9	15527	21	76974	7	2
GO:0019385	methanogenesis, from acetate	biological_process	0.015595	0.34062	11	15527	27	76974	7	4
GO:0016780	phosphotransferase activity, for other substituted phosphate groups	molecular_function	0.021905	0.42507	14	15527	41	76974	7	7
GO:0004618	phosphoglycerate kinase activity	molecular_function	0.024835	0.43355	11	15527	30	76974	7	4
GO:0048513	organ development	biological_process	0.025725	0.44477	11	15527	29	76974	7	4
GO:0003856	3-dehydroquinate synthase activity	molecular_function	0.032623	0.51932	7	15527	16	76974	7	0
GO:0016774	phosphotransferase activity, carboxyl group as acceptor	molecular_function	0.040405	0.57673	11	15527	32	76974	7	4
GO:0008250	oligosaccharyltransferase complex	cellular_component	0.053187	0.69572	11	15527	33	76974	7	4
GO:0002098	tRNA wobble uridine modification	biological_process	0.077896	0.86682	15	15527	50	76974	7	8
GO:0004017	adenylate kinase activity	molecular_function	0.10172	0.99517	11	15527	37	76974	7	4
GO:0007283	spermatogenesis	biological_process	0.14409	1	10	15527	35	76974	7	3
GO:0048232	male gamete generation	biological_process	0.14409	1	10	15527	35	76974	7	3
GO:0015159	polysaccharide transmembrane transporter activity	molecular_function	0.14688	1	7	15527	25	76974	7	0
GO:0006771	riboflavin metabolic process	biological_process	0.16464	1	17	15527	67	76974	7	10
GO:0009231	riboflavin biosynthetic process	biological_process	0.16464	1	17	15527	67	76974	7	10
GO:0042726	flavin-containing compound metabolic process	biological_process	0.16464	1	17	15527	67	76974	7	10
GO:0042727	flavin-containing compound biosynthetic process	biological_process	0.16464	1	17	15527	67	76974	7	10
GO:0015774	polysaccharide transport	biological_process	0.16993	1	7	15527	26	76974	7	0
GO:0033037	polysaccharide localization	biological_process	0.16993	1	7	15527	26	76974	7	0
GO:0015969	guanosine tetraphosphate metabolic process	biological_process	0.18058	1	11	15527	39	76974	7	4
GO:0034035	purine ribonucleoside bisphosphate metabolic process	biological_process	0.18058	1	11	15527	39	76974	7	4
GO:0006188	IMP biosynthetic process	biological_process	0.2114	1	8	15527	30	76974	7	1
GO:0046040	IMP metabolic process	biological_process	0.2114	1	8	15527	30	76974	7	1
GO:0004602	glutathione peroxidase activity	molecular_function	0.21918	1	10	15527	40	76974	7	3
GO:0001101	response to acid chemical	biological_process	0.21998	1	8	15527	32	76974	7	1
GO:0016855	racemase and epimerase activity, acting on amino acids and derivatives	molecular_function	0.23046	1	11	15527	42	76974	7	4
GO:0036361	racemase activity, acting on amino acids and derivatives	molecular_function	0.23046	1	11	15527	42	76974	7	4
GO:0030269	tetrahydromethanopterin S-methyltransferase activity	molecular_function	0.24073	1	7	15527	27	76974	7	0
GO:0042086	5-methyl-5,6,7,8-tetrahydromethanopterin-dependent methyltransferase activity	molecular_function	0.24073	1	7	15527	27	76974	7	0
GO:0004620	phospholipase activity	molecular_function	0.26878	1	9	15527	35	76974	7	2
GO:0009289	pilus	cellular_component	0.27628	1	10	15527	39	76974	7	3
GO:0003950	NAD+ ADP-ribosyltransferase activity	molecular_function	0.28024	1	16	15527	66	76974	7	9
GO:0035064	methylated histone binding	molecular_function	0.2858	1	7	15527	26	76974	7	0
GO:0046912	transferase activity, transferring acyl groups, acyl groups converted into alkyl on transfer	molecular_function	0.3197	1	15	15527	65	76974	7	8
GO:0004523	RNA-DNA hybrid ribonuclease activity	molecular_function	0.32477	1	15	15527	64	76974	7	8
GO:0043066	negative regulation of apoptotic process	biological_process	0.3434	1	10	15527	43	76974	7	3
GO:0043069	negative regulation of programmed cell death	biological_process	0.3434	1	10	15527	43	76974	7	3
GO:0060548	negative regulation of cell death	biological_process	0.3434	1	10	15527	43	76974	7	3
GO:0019238	cyclohydrolase activity	molecular_function	0.34908	1	9	15527	38	76974	7	2
GO:0000159	protein phosphatase type 2A complex	cellular_component	0.35731	1	13	15527	55	76974	7	6
GO:0003747	translation release factor activity	molecular_function	0.38624	1	15	15527	67	76974	7	8
GO:0008079	translation termination factor activity	molecular_function	0.38624	1	15	15527	67	76974	7	8
GO:0004499	N,N-dimethylaniline monooxygenase activity	molecular_function	0.40554	1	16	15527	72	76974	7	9
GO:0033897	ribonuclease T2 activity	molecular_function	0.46466	1	8	15527	38	76974	7	1
GO:0019064	fusion of virus membrane with host plasma membrane	biological_process	0.49442	1	9	15527	42	76974	7	2
GO:0039663	membrane fusion involved in viral entry into host cell	biological_process	0.49442	1	9	15527	42	76974	7	2
GO:0044800	multi-organism membrane fusion	biological_process	0.49442	1	9	15527	42	76974	7	2
GO:0044803	multi-organism membrane organization	biological_process	0.49442	1	9	15527	42	76974	7	2
GO:0019887	protein kinase regulator activity	molecular_function	0.51766	1	10	15527	50	76974	7	3
GO:0000123	histone acetyltransferase complex	cellular_component	0.55595	1	13	15527	64	76974	7	6
GO:0031248	protein acetyltransferase complex	cellular_component	0.55595	1	13	15527	64	76974	7	6
GO:1902493	acetyltransferase complex	cellular_component	0.55595	1	13	15527	64	76974	7	6
GO:0098803	respiratory chain complex	cellular_component	0.57173	1	12	15527	68	76974	7	5
GO:0051205	protein insertion into membrane	biological_process	0.58532	1	9	15527	46	76974	7	2
GO:0016226	iron-sulfur cluster assembly	biological_process	0.58886	1	14	15527	75	76974	7	7
GO:0031163	metallo-sulfur cluster assembly	biological_process	0.58886	1	14	15527	75	76974	7	7
GO:0071826	ribonucleoprotein complex subunit organization	biological_process	0.60871	1	9	15527	47	76974	7	2
GO:0042180	cellular ketone metabolic process	biological_process	0.63479	1	12	15527	64	76974	7	5
GO:0009314	response to radiation	biological_process	0.64424	1	14	15527	71	76974	7	7
GO:0006935	chemotaxis	biological_process	0.65852	1	10	15527	58	76974	7	3
GO:0042330	taxis	biological_process	0.65852	1	10	15527	58	76974	7	3
GO:0030260	entry into host cell	biological_process	0.6697	1	9	15527	48	76974	7	2
GO:0044409	entry into host	biological_process	0.6697	1	9	15527	48	76974	7	2
GO:0046718	viral entry into host cell	biological_process	0.6697	1	9	15527	48	76974	7	2
GO:0051806	entry into cell of other organism involved in symbiotic interaction	biological_process	0.6697	1	9	15527	48	76974	7	2
GO:0051828	entry into other organism involved in symbiotic interaction	biological_process	0.6697	1	9	15527	48	76974	7	2
GO:0005874	microtubule	cellular_component	0.67626	1	14	15527	75	76974	7	7
GO:0005876	spindle microtubule	cellular_component	0.67626	1	14	15527	75	76974	7	7
GO:0007029	endoplasmic reticulum organization	biological_process	0.67775	1	10	15527	54	76974	7	3
GO:0000288	nuclear-transcribed mRNA catabolic process, deadenylation-dependent decay	biological_process	0.68122	1	9	15527	51	76974	7	2
GO:0042025	host cell nucleus	cellular_component	0.72457	1	16	15527	91	76974	7	9
GO:0032507	maintenance of protein location in cell	biological_process	0.73769	1	11	15527	63	76974	7	4
GO:0045185	maintenance of protein location	biological_process	0.73769	1	11	15527	63	76974	7	4
GO:0051651	maintenance of location in cell	biological_process	0.73769	1	11	15527	63	76974	7	4
GO:0016811	hydrolase activity, acting on carbon-nitrogen (but not peptide) bonds, in linear amides	molecular_function	0.77171	1	16	15527	94	76974	7	9
GO:0016307	phosphatidylinositol phosphate kinase activity	molecular_function	0.77192	1	11	15527	62	76974	7	4
GO:0045861	negative regulation of proteolysis	biological_process	0.79181	1	11	15527	66	76974	7	4
GO:0071973	bacterial-type flagellum-dependent cell motility	biological_process	0.79238	1	11	15527	66	76974	7	4
GO:0031109	microtubule polymerization or depolymerization	biological_process	0.79426	1	13	15527	74	76974	7	6
GO:1990542	mitochondrial transmembrane transport	biological_process	0.79881	1	11	15527	66	76974	7	4
GO:0051493	regulation of cytoskeleton organization	biological_process	0.80704	1	15	15527	90	76974	7	8
GO:0033647	host intracellular organelle	cellular_component	0.82768	1	16	15527	98	76974	7	9
GO:0033648	host intracellular membrane-bounded organelle	cellular_component	0.82768	1	16	15527	98	76974	7	9
GO:0001539	cilium or flagellum-dependent cell motility	biological_process	0.84044	1	11	15527	69	76974	7	4
GO:0097588	archaeal or bacterial-type flagellum-dependent cell motility	biological_process	0.84044	1	11	15527	69	76974	7	4
GO:0004356	glutamate-ammonia ligase activity	molecular_function	0.84223	1	9	15527	57	76974	7	2
GO:0007015	actin filament organization	biological_process	0.84375	1	13	15527	81	76974	7	6
GO:0071310	cellular response to organic substance	biological_process	0.85576	1	8	15527	53	76974	7	1
GO:0016211	ammonia ligase activity	molecular_function	0.85714	1	9	15527	58	76974	7	2
GO:0016880	acid-ammonia (or amide) ligase activity	molecular_function	0.85714	1	9	15527	58	76974	7	2
GO:0002682	regulation of immune system process	biological_process	0.85932	1	9	15527	61	76974	7	2
GO:0008536	Ran GTPase binding	molecular_function	0.88062	1	13	15527	80	76974	7	6
GO:0005048	signal sequence binding	molecular_function	0.88831	1	9	15527	64	76974	7	2
GO:0042277	peptide binding	molecular_function	0.88831	1	9	15527	64	76974	7	2
GO:0004813	alanine-tRNA ligase activity	molecular_function	0.8894	1	11	15527	70	76974	7	4
GO:0006419	alanyl-tRNA aminoacylation	biological_process	0.8894	1	11	15527	70	76974	7	4
GO:0043934	sporulation	biological_process	0.91383	1	12	15527	92	76974	7	5
GO:0042176	regulation of protein catabolic process	biological_process	0.9209	1	11	15527	76	76974	7	4
GO:0008137	NADH dehydrogenase (ubiquinone) activity	molecular_function	0.92447	1	10	15527	76	76974	7	3
GO:0050136	NADH dehydrogenase (quinone) activity	molecular_function	0.92447	1	10	15527	76	76974	7	3
GO:0051235	maintenance of location	biological_process	0.92528	1	11	15527	77	76974	7	4
GO:0045735	nutrient reservoir activity	molecular_function	0.94109	1	11	15527	90	76974	7	4
GO:0032879	regulation of localization	biological_process	0.9559	1	15	15527	110	76974	7	8
GO:0051338	regulation of transferase activity	biological_process	0.95983	1	12	15527	91	76974	7	5
GO:0006289	nucleotide-excision repair	biological_process	0.99111	1	11	15527	94	76974	7	4
GO:0016782	transferase activity, transferring sulfur-containing groups	molecular_function	0.99276	1	10	15527	95	76974	7	3
GO:0015294	solute:cation symporter activity	molecular_function	0.99495	1	9	15527	87	76974	7	2
GO:0015293	symporter activity	molecular_function	0.99783	1	9	15527	93	76974	7	2
GO:0009891	positive regulation of biosynthetic process	biological_process	0.9985	1	11	15527	112	76974	7	4
GO:0010557	positive regulation of macromolecule biosynthetic process	biological_process	0.9985	1	11	15527	112	76974	7	4
GO:0031328	positive regulation of cellular biosynthetic process	biological_process	0.9985	1	11	15527	112	76974	7	4
GO:0051173	positive regulation of nitrogen compound metabolic process	biological_process	0.9985	1	11	15527	112	76974	7	4
GO:0044003	modification by symbiont of host morphology or physiology	biological_process	0.99916	1	8	15527	94	76974	7	1
GO:0051817	modification of morphology or physiology of other organism involved in symbiotic interaction	biological_process	0.99916	1	8	15527	94	76974	7	1
GO:0008883	glutamyl-tRNA reductase activity	molecular_function	0.010558	0.26372	8	15527	17	76974	6	2
GO:0000156	phosphorelay response regulator activity	molecular_function	0.012111	0.29316	7	15527	14	76974	6	1
GO:0003847	1-alkyl-2-acetylglycerophosphocholine esterase activity	molecular_function	0.018571	0.37753	7	15527	15	76974	6	1
GO:0050151	oleate hydratase activity	molecular_function	0.022155	0.42552	12	15527	32	76974	6	6
GO:0005816	spindle pole body	cellular_component	0.035053	0.54064	9	15527	23	76974	6	3
GO:0005823	central plaque of spindle pole body	cellular_component	0.035053	0.54064	9	15527	23	76974	6	3
GO:0009271	phage shock	biological_process	0.038416	0.562	10	15527	28	76974	6	4
GO:0098586	cellular response to virus	biological_process	0.038416	0.562	10	15527	28	76974	6	4
GO:0005200	structural constituent of cytoskeleton	molecular_function	0.057951	0.73094	9	15527	25	76974	6	3
GO:0009415	response to water	biological_process	0.061807	0.75901	7	15527	21	76974	6	1
GO:0008661	1-deoxy-D-xylulose-5-phosphate synthase activity	molecular_function	0.076847	0.86127	16	15527	54	76974	6	10
GO:0016744	transferase activity, transferring aldehyde or ketonic groups	molecular_function	0.076847	0.86127	16	15527	54	76974	6	10
GO:0031503	protein complex localization	biological_process	0.10983	1	7	15527	21	76974	6	1
GO:0034629	cellular protein complex localization	biological_process	0.10983	1	7	15527	21	76974	6	1
GO:0044461	bacterial-type flagellum part	cellular_component	0.11247	1	9	15527	30	76974	6	3
GO:0004435	phosphatidylinositol phospholipase C activity	molecular_function	0.12463	1	8	15527	25	76974	6	2
GO:0004629	phospholipase C activity	molecular_function	0.12463	1	8	15527	25	76974	6	2
GO:0048511	rhythmic process	biological_process	0.13074	1	10	15527	35	76974	6	4
GO:0044463	cell projection part	cellular_component	0.16641	1	9	15527	33	76974	6	3
GO:0008837	diaminopimelate epimerase activity	molecular_function	0.21772	1	9	15527	33	76974	6	3
GO:0047661	amino-acid racemase activity	molecular_function	0.21772	1	9	15527	33	76974	6	3
GO:0000245	spliceosomal complex assembly	biological_process	0.2212	1	8	15527	29	76974	6	2
GO:0005685	U1 snRNP	cellular_component	0.2212	1	8	15527	29	76974	6	2
GO:0006376	mRNA splice site selection	biological_process	0.2212	1	8	15527	29	76974	6	2
GO:0030532	small nuclear ribonucleoprotein complex	cellular_component	0.2212	1	8	15527	29	76974	6	2
GO:0097525	spliceosomal snRNP complex	cellular_component	0.2212	1	8	15527	29	76974	6	2
GO:0004806	triglyceride lipase activity	molecular_function	0.22836	1	8	15527	29	76974	6	2
GO:0031124	mRNA 3'-end processing	biological_process	0.28373	1	8	15527	32	76974	6	2
GO:0005086	ARF guanyl-nucleotide exchange factor activity	molecular_function	0.32569	1	7	15527	27	76974	6	1
GO:0032011	ARF protein signal transduction	biological_process	0.32569	1	7	15527	27	76974	6	1
GO:0032012	regulation of ARF protein signal transduction	biological_process	0.32569	1	7	15527	27	76974	6	1
GO:0006558	L-phenylalanine metabolic process	biological_process	0.33225	1	8	15527	32	76974	6	2
GO:1902221	erythrose 4-phosphate/phosphoenolpyruvate family amino acid metabolic process	biological_process	0.33225	1	8	15527	32	76974	6	2
GO:0051346	negative regulation of hydrolase activity	biological_process	0.3333	1	9	15527	40	76974	6	3
GO:0033588	Elongator holoenzyme complex	cellular_component	0.33733	1	13	15527	56	76974	6	7
GO:0009074	aromatic amino acid family catabolic process	biological_process	0.36888	1	6	15527	25	76974	6	0
GO:0044781	bacterial-type flagellum organization	biological_process	0.38073	1	9	15527	39	76974	6	3
GO:0003918	DNA topoisomerase type II (ATP-hydrolyzing) activity	molecular_function	0.40202	1	9	15527	39	76974	6	3
GO:0061505	DNA topoisomerase II activity	molecular_function	0.40202	1	9	15527	39	76974	6	3
GO:0010109	regulation of photosynthesis	biological_process	0.41013	1	7	15527	31	76974	6	1
GO:0042548	regulation of photosynthesis, light reaction	biological_process	0.41013	1	7	15527	31	76974	6	1
GO:0042549	photosystem II stabilization	biological_process	0.41013	1	7	15527	31	76974	6	1
GO:0043467	regulation of generation of precursor metabolites and energy	biological_process	0.41013	1	7	15527	31	76974	6	1
GO:0031123	RNA 3'-end processing	biological_process	0.4151	1	8	15527	36	76974	6	2
GO:0022618	ribonucleoprotein complex assembly	biological_process	0.42095	1	8	15527	36	76974	6	2
GO:0004478	methionine adenosyltransferase activity	molecular_function	0.43799	1	6	15527	26	76974	6	0
GO:0006556	S-adenosylmethionine biosynthetic process	biological_process	0.43799	1	6	15527	26	76974	6	0
GO:0046500	S-adenosylmethionine metabolic process	biological_process	0.43799	1	6	15527	26	76974	6	0
GO:0030474	spindle pole body duplication	biological_process	0.44837	1	12	15527	54	76974	6	6
GO:0051300	spindle pole body organization	biological_process	0.44837	1	12	15527	54	76974	6	6
GO:0051239	regulation of multicellular organismal process	biological_process	0.4573	1	12	15527	57	76974	6	6
GO:0004470	malic enzyme activity	molecular_function	0.51324	1	13	15527	61	76974	6	7
GO:0004471	malate dehydrogenase (decarboxylating) (NAD+) activity	molecular_function	0.51324	1	13	15527	61	76974	6	7
GO:0004665	prephenate dehydrogenase (NADP+) activity	molecular_function	0.51519	1	7	15527	33	76974	6	1
GO:0006571	tyrosine biosynthetic process	biological_process	0.51519	1	7	15527	33	76974	6	1
GO:0008977	prephenate dehydrogenase activity	molecular_function	0.51519	1	7	15527	33	76974	6	1
GO:0010638	positive regulation of organelle organization	biological_process	0.53859	1	11	15527	54	76974	6	5
GO:0008107	galactoside 2-alpha-L-fucosyltransferase activity	molecular_function	0.55272	1	6	15527	28	76974	6	0
GO:0031127	alpha-(1,2)-fucosyltransferase activity	molecular_function	0.55272	1	6	15527	28	76974	6	0
GO:0044815	DNA packaging complex	cellular_component	0.55778	1	9	15527	46	76974	6	3
GO:0050776	regulation of immune response	biological_process	0.5609	1	7	15527	36	76974	6	1
GO:0007008	outer mitochondrial membrane organization	biological_process	0.5881	1	9	15527	45	76974	6	3
GO:0045040	protein import into mitochondrial outer membrane	biological_process	0.5881	1	9	15527	45	76974	6	3
GO:0090151	establishment of protein localization to mitochondrial membrane	biological_process	0.5881	1	9	15527	45	76974	6	3
GO:0070069	cytochrome complex	cellular_component	0.60009	1	11	15527	62	76974	6	5
GO:0006801	superoxide metabolic process	biological_process	0.60543	1	8	15527	48	76974	6	2
GO:0072593	reactive oxygen species metabolic process	biological_process	0.60543	1	8	15527	48	76974	6	2
GO:0031023	microtubule organizing center organization	biological_process	0.60689	1	15	15527	76	76974	6	9
GO:0050793	regulation of developmental process	biological_process	0.62636	1	14	15527	76	76974	6	8
GO:0000289	nuclear-transcribed mRNA poly(A) tail shortening	biological_process	0.63392	1	8	15527	44	76974	6	2
GO:0016615	malate dehydrogenase activity	molecular_function	0.63807	1	13	15527	66	76974	6	7
GO:0016641	oxidoreductase activity, acting on the CH-NH2 group of donors, oxygen as acceptor	molecular_function	0.64695	1	18	15527	95	76974	6	12
GO:0070009	serine-type aminopeptidase activity	molecular_function	0.64744	1	13	15527	67	76974	6	7
GO:0005126	cytokine receptor binding	molecular_function	0.65119	1	12	15527	63	76974	6	6
GO:0044769	ATPase activity, coupled to transmembrane movement of ions, rotational mechanism	molecular_function	0.67009	1	9	15527	51	76974	6	3
GO:0051260	protein homooligomerization	biological_process	0.69498	1	7	15527	38	76974	6	1
GO:0006302	double-strand break repair	biological_process	0.70285	1	13	15527	72	76974	6	7
GO:0009416	response to light stimulus	biological_process	0.7101	1	13	15527	69	76974	6	7
GO:0004843	ubiquitin-specific protease activity	molecular_function	0.71685	1	10	15527	56	76974	6	4
GO:0008239	dipeptidyl-peptidase activity	molecular_function	0.73147	1	13	15527	71	76974	6	7
GO:0006022	aminoglycan metabolic process	biological_process	0.73185	1	19	15527	108	76974	6	13
GO:0007020	microtubule nucleation	biological_process	0.73621	1	12	15527	65	76974	6	6
GO:0046785	microtubule polymerization	biological_process	0.73621	1	12	15527	65	76974	6	6
GO:0005199	structural constituent of cell wall	molecular_function	0.75577	1	10	15527	62	76974	6	4
GO:0003909	DNA ligase activity	molecular_function	0.76182	1	13	15527	73	76974	6	7
GO:0004645	phosphorylase activity	molecular_function	0.76524	1	7	15527	40	76974	6	1
GO:0008184	glycogen phosphorylase activity	molecular_function	0.76524	1	7	15527	40	76974	6	1
GO:0019843	rRNA binding	molecular_function	0.7658	1	10	15527	65	76974	6	4
GO:0051056	regulation of small GTPase mediated signal transduction	biological_process	0.76766	1	8	15527	46	76974	6	2
GO:0005759	mitochondrial matrix	cellular_component	0.77718	1	7	15527	44	76974	6	1
GO:0042600	chorion	cellular_component	0.77901	1	8	15527	49	76974	6	2
GO:0015098	molybdate ion transmembrane transporter activity	molecular_function	0.78034	1	9	15527	52	76974	6	3
GO:0015689	molybdate ion transport	biological_process	0.78034	1	9	15527	52	76974	6	3
GO:0008064	regulation of actin polymerization or depolymerization	biological_process	0.78379	1	11	15527	66	76974	6	5
GO:0008154	actin polymerization or depolymerization	biological_process	0.78379	1	11	15527	66	76974	6	5
GO:0030041	actin filament polymerization	biological_process	0.78379	1	11	15527	66	76974	6	5
GO:0030832	regulation of actin filament length	biological_process	0.78379	1	11	15527	66	76974	6	5
GO:0030833	regulation of actin filament polymerization	biological_process	0.78379	1	11	15527	66	76974	6	5
GO:0032271	regulation of protein polymerization	biological_process	0.78379	1	11	15527	66	76974	6	5
GO:0032535	regulation of cellular component size	biological_process	0.78379	1	11	15527	66	76974	6	5
GO:0032956	regulation of actin cytoskeleton organization	biological_process	0.78379	1	11	15527	66	76974	6	5
GO:0032970	regulation of actin filament-based process	biological_process	0.78379	1	11	15527	66	76974	6	5
GO:0043254	regulation of protein complex assembly	biological_process	0.78379	1	11	15527	66	76974	6	5
GO:0019829	cation-transporting ATPase activity	molecular_function	0.79775	1	9	15527	57	76974	6	3
GO:0042625	ATPase activity, coupled to transmembrane movement of ions	molecular_function	0.79775	1	9	15527	57	76974	6	3
GO:0006816	calcium ion transport	biological_process	0.79978	1	11	15527	67	76974	6	5
GO:0016888	endodeoxyribonuclease activity, producing 5'-phosphomonoesters	molecular_function	0.80205	1	9	15527	56	76974	6	3
GO:0016755	transferase activity, transferring amino-acyl groups	molecular_function	0.81072	1	10	15527	61	76974	6	4
GO:0044087	regulation of cellular component biogenesis	biological_process	0.83998	1	14	15527	86	76974	6	8
GO:0007265	Ras protein signal transduction	biological_process	0.84197	1	7	15527	44	76974	6	1
GO:0046578	regulation of Ras protein signal transduction	biological_process	0.84197	1	7	15527	44	76974	6	1
GO:0043248	proteasome assembly	biological_process	0.84695	1	14	15527	85	76974	6	8
GO:0004650	polygalacturonase activity	molecular_function	0.8532	1	9	15527	58	76974	6	3
GO:0090066	regulation of anatomical structure size	biological_process	0.85888	1	11	15527	71	76974	6	5
GO:0006099	tricarboxylic acid cycle	biological_process	0.91375	1	12	15527	79	76974	6	6
GO:0006101	citrate metabolic process	biological_process	0.91375	1	12	15527	79	76974	6	6
GO:2001070	starch binding	molecular_function	0.93008	1	11	15527	77	76974	6	5
GO:0072350	tricarboxylic acid metabolic process	biological_process	0.9472	1	12	15527	84	76974	6	6
GO:0048468	cell development	biological_process	0.95623	1	10	15527	81	76974	6	4
GO:0016247	channel regulator activity	molecular_function	0.97349	1	6	15527	55	76974	6	0
GO:0009060	aerobic respiration	biological_process	0.98038	1	12	15527	93	76974	6	6
GO:0045893	positive regulation of transcription, DNA-templated	biological_process	0.98886	1	10	15527	87	76974	6	4
GO:1903508	positive regulation of nucleic acid-templated transcription	biological_process	0.98886	1	10	15527	87	76974	6	4
GO:0033227	dsRNA transport	biological_process	0.99012	1	7	15527	80	76974	6	1
GO:0051032	nucleic acid transmembrane transporter activity	molecular_function	0.99012	1	7	15527	80	76974	6	1
GO:0051033	RNA transmembrane transporter activity	molecular_function	0.99012	1	7	15527	80	76974	6	1
GO:0000070	mitotic sister chromatid segregation	biological_process	0.99166	1	10	15527	89	76974	6	4
GO:0000819	sister chromatid segregation	biological_process	0.99166	1	10	15527	89	76974	6	4
GO:0045935	positive regulation of nucleobase-containing compound metabolic process	biological_process	0.99536	1	10	15527	94	76974	6	4
GO:0051254	positive regulation of RNA metabolic process	biological_process	0.99536	1	10	15527	94	76974	6	4
GO:1902680	positive regulation of RNA biosynthetic process	biological_process	0.99536	1	10	15527	94	76974	6	4
GO:0005179	hormone activity	molecular_function	0.99742	1	10	15527	97	76974	6	4
GO:0007129	synapsis	biological_process	0.000938	0.044039	12	15527	24	76974	5	7
GO:0007130	synaptonemal complex assembly	biological_process	0.000938	0.044039	12	15527	24	76974	5	7
GO:0045143	homologous chromosome segregation	biological_process	0.000938	0.044039	12	15527	24	76974	5	7
GO:0070192	chromosome organization involved in meiosis	biological_process	0.000938	0.044039	12	15527	24	76974	5	7
GO:0070193	synaptonemal complex organization	biological_process	0.000938	0.044039	12	15527	24	76974	5	7
GO:0010207	photosystem II assembly	biological_process	0.001598	0.066079	21	15527	55	76974	5	16
GO:0009318	exodeoxyribonuclease VII complex	cellular_component	0.002991	0.099222	6	15527	9	76974	5	1
GO:0006471	protein ADP-ribosylation	biological_process	0.003941	0.12503	13	15527	30	76974	5	8
GO:0045132	meiotic chromosome segregation	biological_process	0.007061	0.19975	12	15527	29	76974	5	7
GO:0006007	glucose catabolic process	biological_process	0.012984	0.30795	6	15527	11	76974	5	1
GO:0019320	hexose catabolic process	biological_process	0.012984	0.30795	6	15527	11	76974	5	1
GO:0046365	monosaccharide catabolic process	biological_process	0.012984	0.30795	6	15527	11	76974	5	1
GO:0004571	mannosyl-oligosaccharide 1,2-alpha-mannosidase activity	molecular_function	0.014899	0.33636	21	15527	63	76974	5	16
GO:0015924	mannosyl-oligosaccharide mannosidase activity	molecular_function	0.014899	0.33636	21	15527	63	76974	5	16
GO:0004018	N6-(1,2-dicarboxyethyl)AMP AMP-lyase (fumarate-forming) activity	molecular_function	0.023565	0.42943	6	15527	12	76974	5	1
GO:0004635	phosphoribosyl-AMP cyclohydrolase activity	molecular_function	0.024685	0.43253	7	15527	16	76974	5	2
GO:0016842	amidine-lyase activity	molecular_function	0.03347	0.52975	6	15527	13	76974	5	1
GO:0016125	sterol metabolic process	biological_process	0.038673	0.5635	5	15527	12	76974	5	0
GO:0030896	checkpoint clamp complex	cellular_component	0.050017	0.66164	5	15527	11	76974	5	0
GO:0006824	cobalt ion transport	biological_process	0.054339	0.70201	5	15527	11	76974	5	0
GO:0015087	cobalt ion transmembrane transporter activity	molecular_function	0.054339	0.70201	5	15527	11	76974	5	0
GO:0034227	tRNA thio-modification	biological_process	0.061904	0.75901	8	15527	23	76974	5	3
GO:0006480	N-terminal protein amino acid methylation	biological_process	0.066605	0.78587	9	15527	28	76974	5	4
GO:0031365	N-terminal protein amino acid modification	biological_process	0.066605	0.78587	9	15527	28	76974	5	4
GO:0004832	valine-tRNA ligase activity	molecular_function	0.09527	0.96312	7	15527	20	76974	5	2
GO:0006438	valyl-tRNA aminoacylation	biological_process	0.09527	0.96312	7	15527	20	76974	5	2
GO:0009832	plant-type cell wall biogenesis	biological_process	0.1096	1	5	15527	13	76974	5	0
GO:0010215	cellulose microfibril organization	biological_process	0.1096	1	5	15527	13	76974	5	0
GO:0030198	extracellular matrix organization	biological_process	0.1096	1	5	15527	13	76974	5	0
GO:0043062	extracellular structure organization	biological_process	0.1096	1	5	15527	13	76974	5	0
GO:0070726	cell wall assembly	biological_process	0.1096	1	5	15527	13	76974	5	0
GO:0071668	plant-type cell wall assembly	biological_process	0.1096	1	5	15527	13	76974	5	0
GO:0000062	fatty-acyl-CoA binding	molecular_function	0.11621	1	9	15527	31	76974	5	4
GO:0009070	serine family amino acid biosynthetic process	biological_process	0.12274	1	7	15527	21	76974	5	2
GO:0000394	RNA splicing, via endonucleolytic cleavage and ligation	biological_process	0.13326	1	12	15527	43	76974	5	7
GO:0006388	tRNA splicing, via endonucleolytic cleavage and ligation	biological_process	0.13326	1	12	15527	43	76974	5	7
GO:0008830	dTDP-4-dehydrorhamnose 3,5-epimerase activity	molecular_function	0.15231	1	5	15527	14	76974	5	0
GO:0009584	detection of visible light	biological_process	0.153	1	12	15527	42	76974	5	7
GO:0006432	phenylalanyl-tRNA aminoacylation	biological_process	0.15394	1	6	15527	18	76974	5	1
GO:0045300	acyl-[acyl-carrier-protein] desaturase activity	molecular_function	0.16048	1	7	15527	23	76974	5	2
GO:0005956	protein kinase CK2 complex	cellular_component	0.1726	1	7	15527	23	76974	5	2
GO:0018298	protein-chromophore linkage	biological_process	0.17404	1	12	15527	43	76974	5	7
GO:0001558	regulation of cell growth	biological_process	0.18295	1	6	15527	19	76974	5	1
GO:0005520	insulin-like growth factor binding	molecular_function	0.18295	1	6	15527	19	76974	5	1
GO:0035257	nuclear hormone receptor binding	molecular_function	0.1877	1	5	15527	15	76974	5	0
GO:0051427	hormone receptor binding	molecular_function	0.1877	1	5	15527	15	76974	5	0
GO:0009581	detection of external stimulus	biological_process	0.19639	1	12	15527	44	76974	5	7
GO:0009582	detection of abiotic stimulus	biological_process	0.19639	1	12	15527	44	76974	5	7
GO:0009583	detection of light stimulus	biological_process	0.19639	1	12	15527	44	76974	5	7
GO:0046789	host cell surface receptor binding	molecular_function	0.19856	1	6	15527	20	76974	5	1
GO:0050792	regulation of viral process	biological_process	0.20539	1	12	15527	45	76974	5	7
GO:0003997	acyl-CoA oxidase activity	molecular_function	0.21523	1	8	15527	28	76974	5	3
GO:0010277	chlorophyllide a oxygenase [overall] activity	molecular_function	0.21693	1	6	15527	20	76974	5	1
GO:0051606	detection of stimulus	biological_process	0.21996	1	12	15527	45	76974	5	7
GO:0046812	host cell surface binding	molecular_function	0.23516	1	6	15527	21	76974	5	1
GO:0006635	fatty acid beta-oxidation	biological_process	0.24216	1	8	15527	29	76974	5	3
GO:0009062	fatty acid catabolic process	biological_process	0.24216	1	8	15527	29	76974	5	3
GO:0019395	fatty acid oxidation	biological_process	0.24216	1	8	15527	29	76974	5	3
GO:0034440	lipid oxidation	biological_process	0.24216	1	8	15527	29	76974	5	3
GO:0040008	regulation of growth	biological_process	0.25019	1	6	15527	21	76974	5	1
GO:0008131	primary amine oxidase activity	molecular_function	0.25279	1	17	15527	69	76974	5	12
GO:0043903	regulation of symbiosis, encompassing mutualism through parasitism	biological_process	0.25433	1	12	15527	47	76974	5	7
GO:0019838	growth factor binding	molecular_function	0.2573	1	6	15527	21	76974	5	1
GO:0016055	Wnt signaling pathway	biological_process	0.26505	1	6	15527	22	76974	5	1
GO:0043281	regulation of cysteine-type endopeptidase activity involved in apoptotic process	biological_process	0.27944	1	6	15527	22	76974	5	1
GO:2000116	regulation of cysteine-type endopeptidase activity	biological_process	0.27944	1	6	15527	22	76974	5	1
GO:0005750	mitochondrial respiratory chain complex III	cellular_component	0.28446	1	10	15527	44	76974	5	5
GO:0006122	mitochondrial electron transport, ubiquinol to cytochrome c	biological_process	0.28446	1	10	15527	44	76974	5	5
GO:0045275	respiratory chain complex III	cellular_component	0.28446	1	10	15527	44	76974	5	5
GO:0003880	protein C-terminal carboxyl O-methyltransferase activity	molecular_function	0.29438	1	5	15527	19	76974	5	0
GO:0004671	protein C-terminal S-isoprenylcysteine carboxyl O-methyltransferase activity	molecular_function	0.29438	1	5	15527	19	76974	5	0
GO:0006481	C-terminal protein methylation	biological_process	0.29438	1	5	15527	19	76974	5	0
GO:0010340	carboxyl-O-methyltransferase activity	molecular_function	0.29438	1	5	15527	19	76974	5	0
GO:0018410	C-terminal protein amino acid modification	biological_process	0.29438	1	5	15527	19	76974	5	0
GO:0043687	post-translational protein modification	biological_process	0.29438	1	5	15527	19	76974	5	0
GO:0051998	protein carboxyl O-methyltransferase activity	molecular_function	0.29438	1	5	15527	19	76974	5	0
GO:0003964	RNA-directed DNA polymerase activity	molecular_function	0.30734	1	6	15527	22	76974	5	1
GO:0072329	monocarboxylic acid catabolic process	biological_process	0.33298	1	8	15527	32	76974	5	3
GO:0010038	response to metal ion	biological_process	0.34244	1	7	15527	29	76974	5	2
GO:0070851	growth factor receptor binding	molecular_function	0.36049	1	9	15527	37	76974	5	4
GO:0005829	cytosol	cellular_component	0.36077	1	8	15527	34	76974	5	3
GO:0031082	BLOC complex	cellular_component	0.36077	1	8	15527	34	76974	5	3
GO:0031083	BLOC-1 complex	cellular_component	0.36077	1	8	15527	34	76974	5	3
GO:0044445	cytosolic part	cellular_component	0.36077	1	8	15527	34	76974	5	3
GO:0000372	Group I intron splicing	biological_process	0.36747	1	9	15527	37	76974	5	4
GO:0000376	RNA splicing, via transesterification reactions with guanosine as nucleophile	biological_process	0.36747	1	9	15527	37	76974	5	4
GO:0044242	cellular lipid catabolic process	biological_process	0.37801	1	8	15527	33	76974	5	3
GO:0003871	5-methyltetrahydropteroyltriglutamate-homocysteine S-methyltransferase activity	molecular_function	0.38111	1	10	15527	42	76974	5	5
GO:0042085	5-methyltetrahydropteroyltri-L-glutamate-dependent methyltransferase activity	molecular_function	0.38111	1	10	15527	42	76974	5	5
GO:0030131	clathrin adaptor complex	cellular_component	0.39043	1	8	15527	33	76974	5	3
GO:0004869	cysteine-type endopeptidase inhibitor activity	molecular_function	0.39275	1	7	15527	33	76974	5	2
GO:0016634	oxidoreductase activity, acting on the CH-CH group of donors, oxygen as acceptor	molecular_function	0.41516	1	8	15527	34	76974	5	3
GO:0005885	Arp2/3 protein complex	cellular_component	0.42384	1	8	15527	36	76974	5	3
GO:0016670	oxidoreductase activity, acting on a sulfur group of donors, oxygen as acceptor	molecular_function	0.43954	1	8	15527	36	76974	5	3
GO:0052547	regulation of peptidase activity	biological_process	0.44356	1	6	15527	26	76974	5	1
GO:0052548	regulation of endopeptidase activity	biological_process	0.44356	1	6	15527	26	76974	5	1
GO:2000026	regulation of multicellular organismal development	biological_process	0.44858	1	10	15527	47	76974	5	5
GO:0042765	GPI-anchor transamidase complex	cellular_component	0.45106	1	7	15527	31	76974	5	2
GO:0006213	pyrimidine nucleoside metabolic process	biological_process	0.4518	1	10	15527	48	76974	5	5
GO:0004615	phosphomannomutase activity	molecular_function	0.47571	1	8	15527	37	76974	5	3
GO:0009226	nucleotide-sugar biosynthetic process	biological_process	0.47571	1	8	15527	37	76974	5	3
GO:0009298	GDP-mannose biosynthetic process	biological_process	0.47571	1	8	15527	37	76974	5	3
GO:0019673	GDP-mannose metabolic process	biological_process	0.47571	1	8	15527	37	76974	5	3
GO:0030838	positive regulation of actin filament polymerization	biological_process	0.49319	1	8	15527	38	76974	5	3
GO:0031334	positive regulation of protein complex assembly	biological_process	0.49319	1	8	15527	38	76974	5	3
GO:0032273	positive regulation of protein polymerization	biological_process	0.49319	1	8	15527	38	76974	5	3
GO:0034314	Arp2/3 complex-mediated actin nucleation	biological_process	0.49319	1	8	15527	38	76974	5	3
GO:0044089	positive regulation of cellular component biogenesis	biological_process	0.49319	1	8	15527	38	76974	5	3
GO:0045010	actin nucleation	biological_process	0.49319	1	8	15527	38	76974	5	3
GO:0051495	positive regulation of cytoskeleton organization	biological_process	0.49319	1	8	15527	38	76974	5	3
GO:0007007	inner mitochondrial membrane organization	biological_process	0.50173	1	7	15527	32	76974	5	2
GO:0042407	cristae formation	biological_process	0.50173	1	7	15527	32	76974	5	2
GO:0061617	MICOS complex	cellular_component	0.50173	1	7	15527	32	76974	5	2
GO:1902533	positive regulation of intracellular signal transduction	biological_process	0.51285	1	6	15527	29	76974	5	1
GO:0031304	intrinsic component of mitochondrial inner membrane	cellular_component	0.53424	1	7	15527	33	76974	5	2
GO:0031305	integral component of mitochondrial inner membrane	cellular_component	0.53424	1	7	15527	33	76974	5	2
GO:0032592	integral component of mitochondrial membrane	cellular_component	0.53424	1	7	15527	33	76974	5	2
GO:0098573	intrinsic component of mitochondrial membrane	cellular_component	0.53424	1	7	15527	33	76974	5	2
GO:0009225	nucleotide-sugar metabolic process	biological_process	0.54339	1	8	15527	39	76974	5	3
GO:0003989	acetyl-CoA carboxylase activity	molecular_function	0.54528	1	10	15527	48	76974	5	5
GO:0016421	CoA carboxylase activity	molecular_function	0.54528	1	10	15527	48	76974	5	5
GO:0016885	ligase activity, forming carbon-carbon bonds	molecular_function	0.54528	1	10	15527	48	76974	5	5
GO:0000786	nucleosome	cellular_component	0.55418	1	8	15527	41	76974	5	3
GO:0032993	protein-DNA complex	cellular_component	0.55418	1	8	15527	41	76974	5	3
GO:0002161	aminoacyl-tRNA editing activity	molecular_function	0.56611	1	8	15527	39	76974	5	3
GO:0031011	Ino80 complex	cellular_component	0.57827	1	6	15527	29	76974	5	1
GO:0097346	INO80-type complex	cellular_component	0.57827	1	6	15527	29	76974	5	1
GO:0007224	smoothened signaling pathway	biological_process	0.58742	1	7	15527	41	76974	5	2
GO:0033202	DNA helicase complex	cellular_component	0.60081	1	7	15527	35	76974	5	2
GO:0071203	WASH complex	cellular_component	0.60697	1	7	15527	36	76974	5	2
GO:0016149	translation release factor activity, codon specific	molecular_function	0.61071	1	11	15527	55	76974	5	6
GO:0006109	regulation of carbohydrate metabolic process	biological_process	0.62761	1	8	15527	41	76974	5	3
GO:0015696	ammonium transport	biological_process	0.6568	1	8	15527	43	76974	5	3
GO:0005786	signal recognition particle, endoplasmic reticulum targeting	cellular_component	0.65701	1	6	15527	34	76974	5	1
GO:0030942	endoplasmic reticulum signal peptide binding	molecular_function	0.65701	1	6	15527	34	76974	5	1
GO:0003910	DNA ligase (ATP) activity	molecular_function	0.66432	1	11	15527	57	76974	5	6
GO:1901661	quinone metabolic process	biological_process	0.67047	1	9	15527	49	76974	5	4
GO:1901663	quinone biosynthetic process	biological_process	0.67047	1	9	15527	49	76974	5	4
GO:0016972	thiol oxidase activity	molecular_function	0.68652	1	5	15527	28	76974	5	0
GO:0042181	ketone biosynthetic process	biological_process	0.69622	1	9	15527	50	76974	5	4
GO:0009617	response to bacterium	biological_process	0.70389	1	9	15527	54	76974	5	4
GO:0042742	defense response to bacterium	biological_process	0.70389	1	9	15527	54	76974	5	4
GO:0008519	ammonium transmembrane transporter activity	molecular_function	0.73417	1	8	15527	46	76974	5	3
GO:0006013	mannose metabolic process	biological_process	0.73442	1	8	15527	45	76974	5	3
GO:0030118	clathrin coat	cellular_component	0.75227	1	9	15527	51	76974	5	4
GO:0043112	receptor metabolic process	biological_process	0.75694	1	6	15527	39	76974	5	1
GO:0006334	nucleosome assembly	biological_process	0.76253	1	8	15527	50	76974	5	3
GO:0031497	chromatin assembly	biological_process	0.76253	1	8	15527	50	76974	5	3
GO:0034728	nucleosome organization	biological_process	0.76253	1	8	15527	50	76974	5	3
GO:0003713	transcription coactivator activity	molecular_function	0.76376	1	6	15527	38	76974	5	1
GO:0000184	nuclear-transcribed mRNA catabolic process, nonsense-mediated decay	biological_process	0.76812	1	8	15527	46	76974	5	3
GO:0031400	negative regulation of protein modification process	biological_process	0.77845	1	10	15527	60	76974	5	5
GO:0030436	asexual sporulation	biological_process	0.79019	1	7	15527	52	76974	5	2
GO:0006040	amino sugar metabolic process	biological_process	0.80527	1	14	15527	86	76974	5	9
GO:0070603	SWI/SNF superfamily-type complex	cellular_component	0.8087	1	6	15527	39	76974	5	1
GO:0006333	chromatin assembly or disassembly	biological_process	0.81462	1	8	15527	53	76974	5	3
GO:0006743	ubiquinone metabolic process	biological_process	0.81522	1	6	15527	39	76974	5	1
GO:0006744	ubiquinone biosynthetic process	biological_process	0.81522	1	6	15527	39	76974	5	1
GO:0019236	response to pheromone	biological_process	0.82063	1	7	15527	44	76974	5	2
GO:0016706	oxidoreductase activity, acting on paired donors, with incorporation or reduction of molecular oxygen, 2-oxoglutarate as one donor, and incorporation of one atom each of oxygen into both donors	molecular_function	0.83576	1	7	15527	45	76974	5	2
GO:0003714	transcription corepressor activity	molecular_function	0.84374	1	6	15527	40	76974	5	1
GO:0009982	pseudouridine synthase activity	molecular_function	0.84671	1	11	15527	69	76974	5	6
GO:0007600	sensory perception	biological_process	0.84689	1	8	15527	53	76974	5	3
GO:0050877	neurological system process	biological_process	0.84689	1	8	15527	53	76974	5	3
GO:0051782	negative regulation of cell division	biological_process	0.85418	1	8	15527	53	76974	5	3
GO:0072525	pyridine-containing compound biosynthetic process	biological_process	0.86451	1	8	15527	52	76974	5	3
GO:0006739	NADP metabolic process	biological_process	0.88335	1	11	15527	71	76974	5	6
GO:0004375	glycine dehydrogenase (decarboxylating) activity	molecular_function	0.88567	1	7	15527	47	76974	5	2
GO:0006546	glycine catabolic process	biological_process	0.88567	1	7	15527	47	76974	5	2
GO:0009071	serine family amino acid catabolic process	biological_process	0.88567	1	7	15527	47	76974	5	2
GO:0016642	oxidoreductase activity, acting on the CH-NH2 group of donors, disulfide as acceptor	molecular_function	0.88567	1	7	15527	47	76974	5	2
GO:0045786	negative regulation of cell cycle	biological_process	0.89252	1	12	15527	80	76974	5	7
GO:0016884	carbon-nitrogen ligase activity, with glutamine as amido-N-donor	molecular_function	0.90919	1	7	15527	49	76974	5	2
GO:0017004	cytochrome complex assembly	biological_process	0.91744	1	7	15527	53	76974	5	2
GO:0003008	system process	biological_process	0.91901	1	8	15527	59	76974	5	3
GO:0051607	defense response to virus	biological_process	0.92835	1	9	15527	65	76974	5	4
GO:0002252	immune effector process	biological_process	0.9361	1	9	15527	66	76974	5	4
GO:0000921	septin ring assembly	biological_process	0.93647	1	10	15527	72	76974	5	5
GO:0005940	septin ring	cellular_component	0.93647	1	10	15527	72	76974	5	5
GO:0031106	septin ring organization	biological_process	0.93647	1	10	15527	72	76974	5	5
GO:0032156	septin cytoskeleton	cellular_component	0.93647	1	10	15527	72	76974	5	5
GO:0032185	septin cytoskeleton organization	biological_process	0.93647	1	10	15527	72	76974	5	5
GO:0005351	sugar:proton symporter activity	molecular_function	0.94694	1	7	15527	55	76974	5	2
GO:0015295	solute:proton symporter activity	molecular_function	0.94694	1	7	15527	55	76974	5	2
GO:0019748	secondary metabolic process	biological_process	0.94934	1	12	15527	85	76974	5	7
GO:0010639	negative regulation of organelle organization	biological_process	0.94961	1	13	15527	94	76974	5	8
GO:0051129	negative regulation of cellular component organization	biological_process	0.95997	1	14	15527	102	76974	5	9
GO:0005402	cation:sugar symporter activity	molecular_function	0.96392	1	7	15527	58	76974	5	2
GO:0007031	peroxisome organization	biological_process	0.96435	1	7	15527	66	76974	5	2
GO:0051119	sugar transmembrane transporter activity	molecular_function	0.97427	1	7	15527	61	76974	5	2
GO:0022843	voltage-gated cation channel activity	molecular_function	0.98258	1	5	15527	51	76974	5	0
GO:0006368	transcription elongation from RNA polymerase II promoter	biological_process	0.98292	1	12	15527	97	76974	5	7
GO:0008146	sulfotransferase activity	molecular_function	0.98478	1	7	15527	70	76974	5	2
GO:0006354	DNA-templated transcription, elongation	biological_process	0.98811	1	12	15527	100	76974	5	7
GO:0009306	protein secretion	biological_process	0.99293	1	9	15527	89	76974	5	4
GO:0003006	developmental process involved in reproduction	biological_process	0.99927	1	7	15527	85	76974	5	2
GO:0019048	modulation by virus of host morphology or physiology	biological_process	0.99982	1	6	15527	88	76974	5	1
GO:0000981	RNA polymerase II transcription factor activity, sequence-specific DNA binding	molecular_function	1	1	6	15527	137	76974	5	1
GO:0006729	tetrahydrobiopterin biosynthetic process	biological_process	0.002631	0.090842	6	15527	10	76974	4	2
GO:0008124	4-alpha-hydroxytetrahydrobiopterin dehydratase activity	molecular_function	0.002631	0.090842	6	15527	10	76974	4	2
GO:0046146	tetrahydrobiopterin metabolic process	biological_process	0.002631	0.090842	6	15527	10	76974	4	2
GO:0008430	selenium binding	molecular_function	0.011587	0.28639	6	15527	11	76974	4	2
GO:0008452	RNA ligase activity	molecular_function	0.022396	0.42752	12	15527	33	76974	4	8
GO:0008963	phospho-N-acetylmuramoyl-pentapeptide-transferase activity	molecular_function	0.026813	0.45621	6	15527	13	76974	4	2
GO:0003830	beta-1,4-mannosylglycoprotein 4-beta-N-acetylglucosaminyltransferase activity	molecular_function	0.049852	0.66164	6	15527	14	76974	4	2
GO:0008612	peptidyl-lysine modification to peptidyl-hypusine	biological_process	0.064699	0.77458	4	15527	8	76974	4	0
GO:0003972	RNA ligase (ATP) activity	molecular_function	0.080511	0.89135	10	15527	31	76974	4	6
GO:0046658	anchored component of plasma membrane	cellular_component	0.082388	0.8983	4	15527	9	76974	4	0
GO:0003849	3-deoxy-7-phosphoheptulonate synthase activity	molecular_function	0.092653	0.96181	11	15527	35	76974	4	7
GO:0006515	misfolded or incompletely synthesized protein catabolic process	biological_process	0.10257	0.99517	5	15527	13	76974	4	1
GO:0031144	proteasome localization	biological_process	0.10257	0.99517	5	15527	13	76974	4	1
GO:0035966	response to topologically incorrect protein	biological_process	0.10257	0.99517	5	15527	13	76974	4	1
GO:0035967	cellular response to topologically incorrect protein	biological_process	0.10257	0.99517	5	15527	13	76974	4	1
GO:0051788	response to misfolded protein	biological_process	0.10257	0.99517	5	15527	13	76974	4	1
GO:0071218	cellular response to misfolded protein	biological_process	0.10257	0.99517	5	15527	13	76974	4	1
GO:0071630	nucleus-associated proteasomal ubiquitin-dependent protein catabolic process	biological_process	0.10257	0.99517	5	15527	13	76974	4	1
GO:0030515	snoRNA binding	molecular_function	0.10692	1	7	15527	22	76974	4	3
GO:0036442	hydrogen-exporting ATPase activity	molecular_function	0.12252	1	6	15527	18	76974	4	2
GO:0046961	proton-transporting ATPase activity, rotational mechanism	molecular_function	0.12252	1	6	15527	18	76974	4	2
GO:0004819	glutamine-tRNA ligase activity	molecular_function	0.14447	1	6	15527	18	76974	4	2
GO:0006425	glutaminyl-tRNA aminoacylation	biological_process	0.14447	1	6	15527	18	76974	4	2
GO:0046782	regulation of viral transcription	biological_process	0.14922	1	11	15527	38	76974	4	7
GO:1903900	regulation of viral life cycle	biological_process	0.14922	1	11	15527	38	76974	4	7
GO:0005986	sucrose biosynthetic process	biological_process	0.14974	1	6	15527	18	76974	4	2
GO:0050307	sucrose-phosphate phosphatase activity	molecular_function	0.14974	1	6	15527	18	76974	4	2
GO:0019211	phosphatase activator activity	molecular_function	0.18413	1	5	15527	15	76974	4	1
GO:0004656	procollagen-proline 4-dioxygenase activity	molecular_function	0.20581	1	5	15527	16	76974	4	1
GO:0019798	procollagen-proline dioxygenase activity	molecular_function	0.20581	1	5	15527	16	76974	4	1
GO:0031543	peptidyl-proline dioxygenase activity	molecular_function	0.20581	1	5	15527	16	76974	4	1
GO:0031545	peptidyl-proline 4-dioxygenase activity	molecular_function	0.20581	1	5	15527	16	76974	4	1
GO:0051090	regulation of sequence-specific DNA binding transcription factor activity	biological_process	0.23913	1	8	15527	29	76974	4	4
GO:0009986	cell surface	cellular_component	0.26661	1	10	15527	39	76974	4	6
GO:0004411	homogentisate 1,2-dioxygenase activity	molecular_function	0.27344	1	4	15527	13	76974	4	0
GO:0006559	L-phenylalanine catabolic process	biological_process	0.27344	1	4	15527	13	76974	4	0
GO:1902222	erythrose 4-phosphate/phosphoenolpyruvate family amino acid catabolic process	biological_process	0.27344	1	4	15527	13	76974	4	0
GO:0019203	carbohydrate phosphatase activity	molecular_function	0.29375	1	6	15527	22	76974	4	2
GO:0050308	sugar-phosphatase activity	molecular_function	0.29375	1	6	15527	22	76974	4	2
[truncated: 1,660 more rows]
