# Supplementary material for: <span aria-describedby="tippy-17">Transcriptomic and Metabolomic Profiling Provides Insights into Flavonoids Biosynthesis and Flower Coloring in <em>Loropetalum chinense</em> and <em>Loropetalum chinense</em> var. <em>rubrum</em>
Source: Preprints.org preprint supplement (doi:10.20944/preprints202304.0456.v1), 2023-04-18
Supplement: Supplementary file 22 [file supplementary table S28.xlsx]

## Sheet: Table S28 
Supplementary table S28 The GO enrichment analysis of DETs between XNXY VS LDPF group
GO_accession	Description	Term_type	Over_represented_pValue	Corrected_pValue	DEG_item	DEG_list	Bg_item	Bg_list	up	Down
GO:0005488	binding	molecular_function	0.30217	1	5543	9339	45204	76974	2754	0
GO:0008152	metabolic process	biological_process	6.13e-14	5.76e-11	4948	9339	38138	76974	2434	0
GO:0003824	catalytic activity	molecular_function	2.76e-25	1.3e-21	4979	9339	37140	76974	2428	0
GO:0009987	cellular process	biological_process	0.1664	1	4357	9339	35601	76974	2115	0
GO:0071704	organic substance metabolic process	biological_process	0.01435	0.31757	3744	9339	30055	76974	1790	0
GO:0044699	single-organism process	biological_process	1.23e-09	2.88e-07	3502	9339	26880	76974	1747	0
GO:0044238	primary metabolic process	biological_process	0.048398	0.69292	3577	9339	28867	76974	1703	0
GO:0043167	ion binding	molecular_function	1.13e-12	4.43e-10	3181	9339	23628	76974	1631	0
GO:0097159	organic cyclic compound binding	molecular_function	0.071052	0.8148	3131	9339	25105	76974	1608	0
GO:1901363	heterocyclic compound binding	molecular_function	0.071052	0.8148	3131	9339	25105	76974	1608	0
GO:0044237	cellular metabolic process	biological_process	0.17549	1	3189	9339	25988	76974	1559	0
GO:0043170	macromolecule metabolic process	biological_process	0.9958	1	2597	9339	22305	76974	1284	0
GO:0044260	cellular macromolecule metabolic process	biological_process	0.99096	1	2339	9339	20056	76974	1174	0
GO:0044763	single-organism cellular process	biological_process	0.0065601	0.17405	2376	9339	18770	76974	1145	0
GO:0005515	protein binding	molecular_function	0.62189	1	2295	9339	18804	76974	1065	1230
GO:0044710	single-organism metabolic process	biological_process	5.9e-13	2.77e-10	2034	9339	14730	76974	1047	987
GO:0036094	small molecule binding	molecular_function	1.49e-05	0.0010926	2046	9339	15382	76974	1046	1000
GO:0000166	nucleotide binding	molecular_function	2.16e-05	0.0015116	2001	9339	15049	76974	1019	982
GO:1901265	nucleoside phosphate binding	molecular_function	2.16e-05	0.0015116	2001	9339	15049	76974	1019	982
GO:0043168	anion binding	molecular_function	4.42e-05	0.0029645	1968	9339	14833	76974	996	972
GO:0016740	transferase activity	molecular_function	4.53e-06	0.00038703	1946	9339	14628	76974	923	1023
GO:0006807	nitrogen compound metabolic process	biological_process	0.95687	1	1830	9339	15693	76974	903	927
GO:0097367	carbohydrate derivative binding	molecular_function	0.0046685	0.14053	1718	9339	13219	76974	859	859
GO:0032553	ribonucleotide binding	molecular_function	0.0051041	0.14981	1702	9339	13096	76974	849	853
GO:0017076	purine nucleotide binding	molecular_function	0.0072658	0.18544	1699	9339	13106	76974	846	853
GO:0032555	purine ribonucleotide binding	molecular_function	0.0059584	0.16363	1688	9339	12997	76974	840	848
GO:0001883	purine nucleoside binding	molecular_function	0.0061411	0.16479	1687	9339	12992	76974	840	847
GO:0032549	ribonucleoside binding	molecular_function	0.0061411	0.16479	1687	9339	12992	76974	840	847
GO:0032550	purine ribonucleoside binding	molecular_function	0.0061411	0.16479	1687	9339	12992	76974	840	847
GO:0001882	nucleoside binding	molecular_function	0.006388	0.17044	1687	9339	12996	76974	840	847
GO:0034641	cellular nitrogen compound metabolic process	biological_process	0.97352	1	1689	9339	14584	76974	834	855
GO:0030554	adenyl nucleotide binding	molecular_function	0.00083908	0.036826	1609	9339	12188	76974	804	805
GO:0032559	adenyl ribonucleotide binding	molecular_function	0.00069063	0.033094	1602	9339	12116	76974	801	801
GO:0035639	purine ribonucleoside triphosphate binding	molecular_function	0.017552	0.35682	1578	9339	12238	76974	786	792
GO:0009058	biosynthetic process	biological_process	0.39297	1	1664	9339	13737	76974	786	878
GO:1901360	organic cyclic compound metabolic process	biological_process	0.87296	1	1575	9339	13346	76974	776	799
GO:0019538	protein metabolic process	biological_process	0.077233	0.84036	1561	9339	12439	76974	775	786
GO:0016020	membrane	cellular_component	0.97384	1	1703	9339	14698	76974	774	929
GO:0005524	ATP binding	molecular_function	0.0032595	0.10933	1485	9339	11323	76974	745	740
GO:1901576	organic substance biosynthetic process	biological_process	0.59486	1	1560	9339	13027	76974	733	827
GO:0016787	hydrolase activity	molecular_function	0.042205	0.61742	1630	9339	12931	76974	731	899
GO:0006725	cellular aromatic compound metabolic process	biological_process	0.98219	1	1487	9339	12874	76974	726	761
GO:0046483	heterocycle metabolic process	biological_process	0.98812	1	1477	9339	12836	76974	725	752
GO:0043169	cation binding	molecular_function	1.7e-08	2.21e-06	1329	9339	9614	76974	693	636
GO:0044249	cellular biosynthetic process	biological_process	0.84538	1	1469	9339	12484	76974	690	779
GO:0005623	cell	cellular_component	0.99947	1	1507	9339	13510	76974	687	820
GO:0044464	cell part	cellular_component	0.99947	1	1507	9339	13510	76974	687	820
GO:0046872	metal ion binding	molecular_function	1.64e-08	2.21e-06	1315	9339	9505	76974	684	631
GO:0006139	nucleobase-containing compound metabolic process	biological_process	0.99963	1	1334	9339	11932	76974	667	667
GO:0044267	cellular protein metabolic process	biological_process	0.082571	0.87884	1277	9339	10134	76974	648	629
GO:0005622	intracellular	cellular_component	0.99936	1	1379	9339	12395	76974	632	747
GO:0044424	intracellular part	cellular_component	0.99866	1	1338	9339	11984	76974	619	719
GO:0055114	oxidation-reduction process	biological_process	2.35e-17	3.67e-14	1098	9339	7221	76974	610	488
GO:0016491	oxidoreductase activity	molecular_function	1.86e-20	4.38e-17	1074	9339	6885	76974	598	476
GO:0090304	nucleic acid metabolic process	biological_process	0.99976	1	1176	9339	10608	76974	593	583
GO:0051179	localization	biological_process	0.94271	1	1219	9339	10461	76974	591	628
GO:0051234	establishment of localization	biological_process	0.94647	1	1187	9339	10203	76974	578	609
GO:0006810	transport	biological_process	0.94238	1	1183	9339	10160	76974	576	607
GO:0003676	nucleic acid binding	molecular_function	1	1	1148	9339	10810	76974	561	587
GO:0016772	transferase activity, transferring phosphorus-containing groups	molecular_function	0.077699	0.84036	1101	9339	8634	76974	550	551
GO:0065007	biological regulation	biological_process	0.79663	1	1133	9339	9595	76974	530	603
GO:0010467	gene expression	biological_process	0.99943	1	1097	9339	9927	76974	529	568
GO:0043412	macromolecule modification	biological_process	0.011603	0.27243	1034	9339	7909	76974	515	519
GO:0050789	regulation of biological process	biological_process	0.69543	1	1091	9339	9149	76974	512	579
GO:0050794	regulation of cellular process	biological_process	0.62754	1	1055	9339	8795	76974	502	553
GO:0043226	organelle	cellular_component	0.99737	1	1037	9339	9327	76974	490	547
GO:0044271	cellular nitrogen compound biosynthetic process	biological_process	0.98518	1	1027	9339	9067	76974	489	538
GO:0009059	macromolecule biosynthetic process	biological_process	0.99999	1	1016	9339	9486	76974	488	528
GO:0043229	intracellular organelle	cellular_component	0.99795	1	1017	9339	9177	76974	482	535
GO:0006464	cellular protein modification process	biological_process	0.0015179	0.059901	944	9339	7035	76974	476	468
GO:0036211	protein modification process	biological_process	0.0015179	0.059901	944	9339	7035	76974	476	468
GO:0006796	phosphate-containing compound metabolic process	biological_process	0.0019252	0.07063	949	9339	7094	76974	474	475
GO:0006793	phosphorus metabolic process	biological_process	0.001975	0.071897	949	9339	7096	76974	474	475
GO:0034645	cellular macromolecule biosynthetic process	biological_process	1	1	996	9339	9387	76974	474	522
GO:0016301	kinase activity	molecular_function	0.00055485	0.026862	917	9339	6739	76974	469	448
GO:0016773	phosphotransferase activity, alcohol group as acceptor	molecular_function	0.00010877	0.0064655	872	9339	6303	76974	453	419
GO:0044425	membrane part	cellular_component	0.99856	1	1019	9339	9233	76974	450	569
GO:1902578	single-organism localization	biological_process	0.87904	1	886	9339	7563	76974	433	453
GO:0016070	RNA metabolic process	biological_process	0.99964	1	894	9339	8141	76974	432	462
GO:0044765	single-organism transport	biological_process	0.87803	1	874	9339	7461	76974	429	445
GO:0050896	response to stimulus	biological_process	0.22003	1	833	9339	6765	76974	420	413
GO:1901362	organic cyclic compound biosynthetic process	biological_process	0.55182	1	909	9339	7560	76974	418	491
GO:0046914	transition metal ion binding	molecular_function	0.014124	0.31435	794	9339	6057	76974	402	392
GO:0016310	phosphorylation	biological_process	4.8e-06	0.00040215	784	9339	5495	76974	391	393
GO:0004672	protein kinase activity	molecular_function	0.00019196	0.010605	763	9339	5485	76974	387	376
GO:0043231	intracellular membrane-bounded organelle	cellular_component	0.98173	1	820	9339	7263	76974	385	435
GO:0043227	membrane-bounded organelle	cellular_component	0.98252	1	820	9339	7267	76974	385	435
GO:0031224	intrinsic component of membrane	cellular_component	0.98917	1	782	9339	7019	76974	367	415
GO:0006468	protein phosphorylation	biological_process	7.8e-06	0.00063131	731	9339	5102	76974	366	365
GO:0018130	heterocycle biosynthetic process	biological_process	0.96121	1	807	9339	7062	76974	366	441
GO:1901564	organonitrogen compound metabolic process	biological_process	0.024651	0.43849	745	9339	5813	76974	365	380
GO:0016021	integral component of membrane	cellular_component	0.98999	1	778	9339	6991	76974	365	413
GO:0019438	aromatic compound biosynthetic process	biological_process	0.90583	1	811	9339	6998	76974	362	449
GO:0032991	macromolecular complex	cellular_component	0.99987	1	790	9339	7430	76974	341	449
GO:0034654	nucleobase-containing compound biosynthetic process	biological_process	0.99467	1	688	9339	6217	76974	315	373
GO:0005737	cytoplasm	cellular_component	0.90797	1	646	9339	5704	76974	308	338
GO:0003677	DNA binding	molecular_function	1	1	632	9339	6205	76974	298	334
GO:0044281	small molecule metabolic process	biological_process	8.29e-06	0.00065984	617	9339	4319	76974	294	323
GO:0051716	cellular response to stimulus	biological_process	0.67242	1	578	9339	4862	76974	293	285
GO:0005215	transporter activity	molecular_function	0.84238	1	607	9339	5219	76974	291	316
GO:0019222	regulation of metabolic process	biological_process	0.85027	1	617	9339	5278	76974	287	330
GO:0032774	RNA biosynthetic process	biological_process	0.99411	1	611	9339	5539	76974	279	332
GO:0031323	regulation of cellular metabolic process	biological_process	0.78873	1	589	9339	4990	76974	277	312
GO:0005634	nucleus	cellular_component	0.88764	1	577	9339	4996	76974	274	303
GO:0060255	regulation of macromolecule metabolic process	biological_process	0.78731	1	585	9339	4965	76974	272	313
GO:0080090	regulation of primary metabolic process	biological_process	0.76287	1	570	9339	4816	76974	269	301
GO:0016817	hydrolase activity, acting on acid anhydrides	molecular_function	0.19976	1	542	9339	4281	76974	267	275
GO:0043234	protein complex	cellular_component	0.99933	1	641	9339	5977	76974	267	374
GO:0006351	transcription, DNA-templated	biological_process	0.99797	1	592	9339	5446	76974	265	327
GO:0097659	nucleic acid-templated transcription	biological_process	0.99797	1	592	9339	5446	76974	265	327
GO:1901566	organonitrogen compound biosynthetic process	biological_process	0.14171	1	537	9339	4300	76974	263	274
GO:0044711	single-organism biosynthetic process	biological_process	1.89e-05	0.0013672	581	9339	4096	76974	262	319
GO:0051171	regulation of nitrogen compound metabolic process	biological_process	0.71685	1	552	9339	4640	76974	262	290
GO:0010468	regulation of gene expression	biological_process	0.79192	1	564	9339	4792	76974	262	302
GO:0007154	cell communication	biological_process	0.039327	0.59767	496	9339	3808	76974	260	236
GO:0010556	regulation of macromolecule biosynthetic process	biological_process	0.72431	1	549	9339	4619	76974	259	290
GO:0031326	regulation of cellular biosynthetic process	biological_process	0.72431	1	549	9339	4619	76974	259	290
GO:0009889	regulation of biosynthetic process	biological_process	0.72812	1	549	9339	4621	76974	259	290
GO:0048037	cofactor binding	molecular_function	8.13e-14	6.36e-11	462	9339	2751	76974	252	210
GO:0044422	organelle part	cellular_component	0.99448	1	519	9339	4767	76974	249	270
GO:0016818	hydrolase activity, acting on acid anhydrides, in phosphorus-containing anhydrides	molecular_function	0.26596	1	507	9339	4030	76974	248	259
GO:2000112	regulation of cellular macromolecule biosynthetic process	biological_process	0.82678	1	537	9339	4581	76974	248	289
GO:0044446	intracellular organelle part	cellular_component	0.99485	1	515	9339	4736	76974	248	267
GO:0055085	transmembrane transport	biological_process	0.89873	1	506	9339	4369	76974	245	261
GO:0071840	cellular component organization or biogenesis	biological_process	0.5264	1	509	9339	4217	76974	243	266
GO:0016462	pyrophosphatase activity	molecular_function	0.23843	1	492	9339	3892	76974	240	252
GO:0022857	transmembrane transporter activity	molecular_function	0.80692	1	499	9339	4273	76974	237	262
GO:0019219	regulation of nucleobase-containing compound metabolic process	biological_process	0.76815	1	505	9339	4282	76974	236	269
GO:0017111	nucleoside-triphosphatase activity	molecular_function	0.16314	1	479	9339	3744	76974	235	244
GO:0051252	regulation of RNA metabolic process	biological_process	0.77997	1	500	9339	4247	76974	231	269
GO:2001141	regulation of RNA biosynthetic process	biological_process	0.77997	1	500	9339	4247	76974	231	269
GO:0008270	zinc ion binding	molecular_function	0.9855	1	482	9339	4305	76974	228	254
GO:0044444	cytoplasmic part	cellular_component	0.9756	1	485	9339	4434	76974	226	259
GO:0016043	cellular component organization	biological_process	0.61651	1	460	9339	3848	76974	222	238
GO:0006082	organic acid metabolic process	biological_process	2.17e-09	4.64e-07	465	9339	2963	76974	221	244
GO:0006355	regulation of transcription, DNA-templated	biological_process	0.87159	1	488	9339	4209	76974	220	268
GO:1903506	regulation of nucleic acid-templated transcription	biological_process	0.87159	1	488	9339	4209	76974	220	268
GO:0043436	oxoacid metabolic process	biological_process	5.05e-09	9.88e-07	461	9339	2954	76974	218	243
GO:0019752	carboxylic acid metabolic process	biological_process	1.65e-08	2.21e-06	450	9339	2903	76974	214	236
GO:0006259	DNA metabolic process	biological_process	0.7548	1	388	9339	3316	76974	204	184
GO:0006811	ion transport	biological_process	0.59577	1	411	9339	3449	76974	203	208
GO:0044700	single organism signaling	biological_process	0.63454	1	402	9339	3379	76974	203	199
GO:0023052	signaling	biological_process	0.63956	1	402	9339	3381	76974	203	199
GO:0050662	coenzyme binding	molecular_function	8.81e-12	2.95e-09	378	9339	2249	76974	202	176
GO:0006629	lipid metabolic process	biological_process	1.29e-16	1.51e-13	442	9339	2512	76974	201	241
GO:0007165	signal transduction	biological_process	0.6539	1	398	9339	3354	76974	201	197
GO:0005975	carbohydrate metabolic process	biological_process	0.70317	1	476	9339	3991	76974	195	281
GO:0006950	response to stress	biological_process	0.063202	0.7831	367	9339	2838	76974	194	173
GO:0071702	organic substance transport	biological_process	0.96689	1	400	9339	3599	76974	192	208
GO:0022892	substrate-specific transporter activity	molecular_function	0.92759	1	354	9339	3166	76974	173	181
GO:0033036	macromolecule localization	biological_process	0.98648	1	352	9339	3238	76974	167	185
GO:0022891	substrate-specific transmembrane transporter activity	molecular_function	0.71481	1	334	9339	2859	76974	162	172
GO:0043603	cellular amide metabolic process	biological_process	0.48319	1	304	9339	2552	76974	158	146
GO:0008233	peptidase activity	molecular_function	0.9709	1	327	9339	2992	76974	158	169
GO:0051641	cellular localization	biological_process	0.99608	1	330	9339	3091	76974	158	172
GO:0006508	proteolysis	biological_process	0.83451	1	338	9339	2926	76974	156	182
GO:0043228	non-membrane-bounded organelle	cellular_component	0.97131	1	305	9339	2836	76974	156	149
GO:0043232	intracellular non-membrane-bounded organelle	cellular_component	0.97923	1	296	9339	2777	76974	153	143
GO:0051649	establishment of localization in cell	biological_process	0.99274	1	316	9339	2936	76974	153	163
GO:0043604	amide biosynthetic process	biological_process	0.44991	1	291	9339	2431	76974	152	139
GO:0015075	ion transmembrane transporter activity	molecular_function	0.80029	1	315	9339	2732	76974	151	164
GO:0070011	peptidase activity, acting on L-amino acid peptides	molecular_function	0.89399	1	312	9339	2752	76974	149	163
GO:0016887	ATPase activity	molecular_function	0.86227	1	280	9339	2414	76974	148	132
GO:0008104	protein localization	biological_process	0.99449	1	306	9339	2877	76974	146	160
GO:0019001	guanyl nucleotide binding	molecular_function	0.50761	1	280	9339	2293	76974	145	135
GO:0003723	RNA binding	molecular_function	0.99492	1	294	9339	2765	76974	145	149
GO:0045184	establishment of protein localization	biological_process	0.99138	1	296	9339	2766	76974	143	153
GO:0032561	guanyl ribonucleotide binding	molecular_function	0.48505	1	276	9339	2253	76974	142	134
GO:0005525	GTP binding	molecular_function	0.49174	1	275	9339	2247	76974	142	133
GO:0015031	protein transport	biological_process	0.99	1	292	9339	2723	76974	141	151
GO:0006518	peptide metabolic process	biological_process	0.70061	1	267	9339	2318	76974	139	128
GO:0016788	hydrolase activity, acting on ester bonds	molecular_function	0.0046599	0.14053	361	9339	2614	76974	138	223
GO:0006812	cation transport	biological_process	0.7121	1	288	9339	2470	76974	136	152
GO:0046907	intracellular transport	biological_process	0.99289	1	283	9339	2650	76974	136	147
GO:0051704	multi-organism process	biological_process	0.3591	1	286	9339	2339	76974	135	151
GO:0006412	translation	biological_process	0.64532	1	258	9339	2223	76974	135	123
GO:0043043	peptide biosynthetic process	biological_process	0.65773	1	261	9339	2252	76974	135	126
GO:0046906	tetrapyrrole binding	molecular_function	1.26e-10	3.69e-08	215	9339	1170	76974	134	81
GO:0020037	heme binding	molecular_function	5.34e-11	1.67e-08	212	9339	1139	76974	133	79
GO:0034660	ncRNA metabolic process	biological_process	0.41947	1	232	9339	1869	76974	131	101
GO:0043531	ADP binding	molecular_function	5.57e-05	0.0036335	283	9339	1831	76974	130	153
GO:0005506	iron ion binding	molecular_function	5.23e-12	1.89e-09	230	9339	1224	76974	128	102
GO:0016614	oxidoreductase activity, acting on CH-OH group of donors	molecular_function	1.22e-08	1.79e-06	243	9339	1429	76974	123	120
GO:0008610	lipid biosynthetic process	biological_process	1.08e-12	4.43e-10	252	9339	1357	76974	120	132
GO:0016616	oxidoreductase activity, acting on the CH-OH group of donors, NAD or NADP as acceptor	molecular_function	5.07e-08	5.41e-06	220	9339	1295	76974	119	101
GO:0034613	cellular protein localization	biological_process	0.94277	1	256	9339	2293	76974	117	139
GO:0070727	cellular macromolecule localization	biological_process	0.94277	1	256	9339	2293	76974	117	139
GO:0044283	small molecule biosynthetic process	biological_process	3.07e-10	8.02e-08	257	9339	1460	76974	116	141
GO:0044255	cellular lipid metabolic process	biological_process	2.76e-08	3.11e-06	246	9339	1461	76974	116	130
GO:0016798	hydrolase activity, acting on glycosyl bonds	molecular_function	0.00073677	0.033365	280	9339	1916	76974	116	164
GO:0016829	lyase activity	molecular_function	0.008487	0.21313	205	9339	1444	76974	116	89
GO:0009056	catabolic process	biological_process	0.93496	1	262	9339	2359	76974	116	146
GO:0016705	oxidoreductase activity, acting on paired donors, with incorporation or reduction of molecular oxygen	molecular_function	6.85e-08	7e-06	187	9339	1064	76974	115	72
GO:0004553	hydrolase activity, hydrolyzing O-glycosyl compounds	molecular_function	0.00093399	0.040611	269	9339	1841	76974	115	154
GO:0006396	RNA processing	biological_process	0.98794	1	222	9339	2084	76974	115	107
GO:0006520	cellular amino acid metabolic process	biological_process	0.013146	0.29537	245	9339	1748	76974	114	131
GO:0016757	transferase activity, transferring glycosyl groups	molecular_function	0.060107	0.77337	274	9339	2057	76974	113	161
GO:0006399	tRNA metabolic process	biological_process	0.52876	1	197	9339	1611	76974	113	84
GO:0006886	intracellular protein transport	biological_process	0.90314	1	242	9339	2137	76974	112	130
GO:0044085	cellular component biogenesis	biological_process	0.70177	1	222	9339	1894	76974	110	112
GO:0044428	nuclear part	cellular_component	0.92475	1	219	9339	1993	76974	107	112
GO:0006996	organelle organization	biological_process	0.98312	1	233	9339	2182	76974	102	131
GO:0016053	organic acid biosynthetic process	biological_process	1.54e-13	9.01e-11	228	9339	1165	76974	99	129
GO:0046394	carboxylic acid biosynthetic process	biological_process	1.54e-13	9.01e-11	228	9339	1165	76974	99	129
GO:1901135	carbohydrate derivative metabolic process	biological_process	0.99207	1	207	9339	2000	76974	99	108
GO:0051186	cofactor metabolic process	biological_process	0.0012147	0.052333	180	9339	1190	76974	98	82
GO:0008324	cation transmembrane transporter activity	molecular_function	0.82784	1	225	9339	1991	76974	98	127
GO:0003924	GTPase activity	molecular_function	0.19884	1	212	9339	1638	76974	97	115
GO:0005198	structural molecule activity	molecular_function	0.9836	1	196	9339	1920	76974	97	99
GO:0016741	transferase activity, transferring one-carbon groups	molecular_function	0.0015923	0.061772	225	9339	1544	76974	95	130
GO:0019637	organophosphate metabolic process	biological_process	0.97076	1	188	9339	1762	76974	94	94
GO:0022890	inorganic cation transmembrane transporter activity	molecular_function	0.69201	1	208	9339	1794	76974	93	115
GO:0033554	cellular response to stress	biological_process	0.69566	1	183	9339	1563	76974	93	90
GO:0016758	transferase activity, transferring hexosyl groups	molecular_function	0.077657	0.84036	214	9339	1604	76974	91	123
GO:0030001	metal ion transport	biological_process	0.29947	1	168	9339	1352	76974	91	77
GO:0016192	vesicle-mediated transport	biological_process	0.99854	1	174	9339	1729	76974	91	83
GO:0008168	methyltransferase activity	molecular_function	0.0012569	0.053658	217	9339	1477	76974	90	127
GO:0043933	macromolecular complex subunit organization	biological_process	0.88053	1	172	9339	1542	76974	90	82
GO:0034470	ncRNA processing	biological_process	0.34228	1	164	9339	1302	76974	89	75
GO:0022607	cellular component assembly	biological_process	0.85423	1	169	9339	1502	76974	88	81
GO:0015672	monovalent inorganic cation transport	biological_process	0.51074	1	181	9339	1501	76974	87	94
GO:0044248	cellular catabolic process	biological_process	0.95455	1	197	9339	1820	76974	86	111
GO:0032787	monocarboxylic acid metabolic process	biological_process	2.43e-08	2.85e-06	191	9339	1073	76974	85	106
GO:1902494	catalytic complex	cellular_component	0.97914	1	201	9339	1915	76974	85	116
GO:0098796	membrane protein complex	cellular_component	0.99745	1	248	9339	2439	76974	84	164
GO:0005509	calcium ion binding	molecular_function	0.0019044	0.070418	162	9339	1082	76974	83	79
GO:0006974	cellular response to DNA damage stimulus	biological_process	0.73674	1	170	9339	1460	76974	83	87
GO:1901575	organic substance catabolic process	biological_process	0.84711	1	181	9339	1606	76974	82	99
GO:0003700	transcription factor activity, sequence-specific DNA binding	molecular_function	0.85629	1	179	9339	1587	76974	82	97
GO:0001071	nucleic acid binding transcription factor activity	molecular_function	0.87031	1	179	9339	1594	76974	82	97
GO:0030529	ribonucleoprotein complex	cellular_component	0.9618	1	160	9339	1564	76974	81	79
GO:0016746	transferase activity, transferring acyl groups	molecular_function	1.59e-06	0.00014339	177	9339	1045	76974	80	97
GO:0016874	ligase activity	molecular_function	0.76019	1	134	9339	1149	76974	80	54
GO:0051287	NAD binding	molecular_function	5.65e-05	0.0036371	132	9339	782	76974	79	53
GO:0032501	multicellular organismal process	biological_process	0.0037715	0.12473	159	9339	1065	76974	79	80
GO:0006281	DNA repair	biological_process	0.768	1	161	9339	1392	76974	79	82
GO:0004175	endopeptidase activity	molecular_function	0.95831	1	175	9339	1639	76974	79	96
GO:0044723	single-organism carbohydrate metabolic process	biological_process	0.9995	1	186	9339	1896	76974	78	108
GO:0031090	organelle membrane	cellular_component	0.97078	1	171	9339	1629	76974	77	94
GO:1902582	single-organism intracellular transport	biological_process	0.8961	1	153	9339	1385	76974	73	80
GO:0006732	coenzyme metabolic process	biological_process	0.0047229	0.14127	126	9339	826	76974	72	54
GO:0004386	helicase activity	molecular_function	0.8216	1	135	9339	1175	76974	72	63
GO:0035556	intracellular signal transduction	biological_process	0.93661	1	142	9339	1316	76974	72	70
GO:0008033	tRNA processing	biological_process	0.4626	1	129	9339	1044	76974	71	58
GO:0055086	nucleobase-containing small molecule metabolic process	biological_process	0.49943	1	153	9339	1269	76974	71	82
GO:0071822	protein complex subunit organization	biological_process	0.80321	1	135	9339	1188	76974	71	64
GO:0000287	magnesium ion binding	molecular_function	3.66e-13	1.91e-10	110	9339	451	76974	70	40
GO:0008236	serine-type peptidase activity	molecular_function	0.30976	1	152	9339	1205	76974	68	84
GO:0017171	serine hydrolase activity	molecular_function	0.30976	1	152	9339	1205	76974	68	84
GO:0071944	cell periphery	cellular_component	0.49584	1	151	9339	1257	76974	68	83
GO:0009117	nucleotide metabolic process	biological_process	0.17849	1	142	9339	1091	76974	67	75
GO:0006753	nucleoside phosphate metabolic process	biological_process	0.18389	1	142	9339	1093	76974	67	75
GO:0043233	organelle lumen	cellular_component	0.61206	1	141	9339	1207	76974	67	74
GO:0070013	intracellular organelle lumen	cellular_component	0.61206	1	141	9339	1207	76974	67	74
GO:0031974	membrane-enclosed lumen	cellular_component	0.64105	1	141	9339	1215	76974	67	74
GO:0005576	extracellular region	cellular_component	0.89819	1	152	9339	1390	76974	67	85
GO:0016835	carbon-oxygen lyase activity	molecular_function	1.51e-07	1.45e-05	107	9339	541	76974	66	41
GO:0006461	protein complex assembly	biological_process	0.69272	1	126	9339	1079	76974	66	60
GO:0070271	protein complex biogenesis	biological_process	0.69678	1	126	9339	1080	76974	66	60
GO:0065003	macromolecular complex assembly	biological_process	0.79094	1	128	9339	1125	76974	66	62
GO:0006260	DNA replication	biological_process	0.95725	1	128	9339	1228	76974	66	62
GO:0051188	cofactor biosynthetic process	biological_process	0.084524	0.88554	105	9339	756	76974	65	40
GO:0065008	regulation of biological quality	biological_process	0.45561	1	146	9339	1225	76974	65	81
GO:0031981	nuclear lumen	cellular_component	0.58926	1	135	9339	1151	76974	65	70
GO:0012505	endomembrane system	cellular_component	0.98781	1	156	9339	1520	76974	65	91
GO:0006631	fatty acid metabolic process	biological_process	2.78e-08	3.11e-06	144	9339	760	76974	64	80
GO:0050660	flavin adenine dinucleotide binding	molecular_function	0.0079125	0.20085	111	9339	724	76974	63	48
GO:0022804	active transmembrane transporter activity	molecular_function	0.86822	1	128	9339	1145	76974	63	65
GO:0016747	transferase activity, transferring acyl groups other than amino-acyl groups	molecular_function	5.46e-08	5.7e-06	137	9339	731	76974	62	75
GO:0098588	bounding membrane of organelle	cellular_component	0.9388	1	139	9339	1304	76974	62	77
GO:0006820	anion transport	biological_process	0.26029	1	103	9339	799	76974	61	42
GO:0044764	multi-organism cellular process	biological_process	0.81454	1	129	9339	1160	76974	61	68
GO:0034220	ion transmembrane transport	biological_process	0.5248	1	153	9339	1280	76974	59	94
GO:0003735	structural constituent of ribosome	molecular_function	0.78049	1	117	9339	1095	76974	59	58
GO:1901605	alpha-amino acid metabolic process	biological_process	0.001736	0.06522	137	9339	882	76974	58	79
GO:0019693	ribose phosphate metabolic process	biological_process	0.14559	1	122	9339	923	76974	58	64
GO:0015077	monovalent inorganic cation transmembrane transporter activity	molecular_function	0.7999	1	132	9339	1176	76974	58	74
GO:0004674	protein serine/threonine kinase activity	molecular_function	0.0042959	0.13442	88	9339	543	76974	57	31
GO:1901657	glycosyl compound metabolic process	biological_process	0.45275	1	122	9339	1004	76974	57	65
GO:0004842	ubiquitin-protein transferase activity	molecular_function	0.73539	1	110	9339	949	76974	57	53
GO:0019787	ubiquitin-like protein transferase activity	molecular_function	0.73539	1	110	9339	949	76974	57	53
GO:0006310	DNA recombination	biological_process	0.74808	1	114	9339	985	76974	57	57
GO:0008652	cellular amino acid biosynthetic process	biological_process	8.55e-06	0.0006693	127	9339	716	76974	56	71
GO:0006091	generation of precursor metabolites and energy	biological_process	0.0039887	0.13098	118	9339	767	76974	56	62
GO:0044877	macromolecular complex binding	molecular_function	0.41422	1	146	9339	1177	76974	56	90
GO:0009116	nucleoside metabolic process	biological_process	0.48675	1	121	9339	1003	76974	56	65
GO:1990234	transferase complex	cellular_component	0.99968	1	119	9339	1309	76974	56	63
GO:0043565	sequence-specific DNA binding	molecular_function	0.43877	1	112	9339	907	76974	55	57
GO:0007049	cell cycle	biological_process	0.55423	1	124	9339	1036	76974	55	69
GO:0034622	cellular macromolecular complex assembly	biological_process	0.90194	1	98	9339	910	76974	55	43
GO:0022414	reproductive process	biological_process	7.56e-06	0.00062318	99	9339	521	76974	54	45
GO:1901607	alpha-amino acid biosynthetic process	biological_process	1.07e-05	0.00081245	113	9339	625	76974	54	59
GO:0006163	purine nucleotide metabolic process	biological_process	0.23034	1	115	9339	892	76974	54	61
GO:0072521	purine-containing compound metabolic process	biological_process	0.27522	1	118	9339	927	76974	54	64
GO:0043623	cellular protein complex assembly	biological_process	0.78296	1	92	9339	814	76974	54	38
GO:0005840	ribosome	cellular_component	0.88827	1	112	9339	1090	76974	54	58
GO:0044703	multi-organism reproductive process	biological_process	3.07e-07	2.83e-05	98	9339	487	76974	53	45
GO:0009150	purine ribonucleotide metabolic process	biological_process	0.218	1	113	9339	873	76974	53	60
GO:0009259	ribonucleotide metabolic process	biological_process	0.24349	1	113	9339	880	76974	53	60
GO:0005694	chromosome	cellular_component	0.88595	1	97	9339	891	76974	53	44
GO:0046873	metal ion transmembrane transporter activity	molecular_function	0.9281	1	106	9339	1009	76974	53	53
GO:0044403	symbiosis, encompassing mutualism through parasitism	biological_process	0.94427	1	120	9339	1144	76974	53	67
GO:0044419	interspecies interaction between organisms	biological_process	0.94648	1	120	9339	1146	76974	53	67
GO:0006694	steroid biosynthetic process	biological_process	1.82e-09	4.06e-07	96	9339	439	76974	52	44
GO:0008202	steroid metabolic process	biological_process	2.32e-09	4.74e-07	97	9339	448	76974	52	45
GO:0003854	3-beta-hydroxy-delta5-steroid dehydrogenase activity	molecular_function	9.33e-09	1.56e-06	92	9339	428	76974	52	40
GO:0016229	steroid dehydrogenase activity	molecular_function	9.33e-09	1.56e-06	92	9339	428	76974	52	40
GO:0033764	steroid dehydrogenase activity, acting on the CH-OH group of donors, NAD or NADP as acceptor	molecular_function	9.33e-09	1.56e-06	92	9339	428	76974	52	40
GO:0042278	purine nucleoside metabolic process	biological_process	0.17341	1	112	9339	852	76974	52	60
GO:0046128	purine ribonucleoside metabolic process	biological_process	0.17341	1	112	9339	852	76974	52	60
GO:0009119	ribonucleoside metabolic process	biological_process	0.31632	1	112	9339	893	76974	52	60
GO:0004871	signal transducer activity	molecular_function	0.99469	1	100	9339	1049	76974	52	48
GO:0090407	organophosphate biosynthetic process	biological_process	0.99687	1	101	9339	1069	76974	52	49
GO:0060089	molecular transducer activity	molecular_function	0.99799	1	100	9339	1078	76974	52	48
GO:1901137	carbohydrate derivative biosynthetic process	biological_process	0.99937	1	110	9339	1205	76974	52	58
GO:0009108	coenzyme biosynthetic process	biological_process	0.023577	0.4242	78	9339	513	76974	51	27
GO:0046983	protein dimerization activity	molecular_function	0.55063	1	122	9339	1011	76974	51	71
GO:0009856	pollination	biological_process	1.13e-08	1.72e-06	86	9339	380	76974	50	36
GO:0009875	pollen-pistil interaction	biological_process	1.13e-08	1.72e-06	86	9339	380	76974	50	36
GO:0048544	recognition of pollen	biological_process	1.13e-08	1.72e-06	86	9339	380	76974	50	36
GO:0044706	multi-multicellular organism process	biological_process	1.28e-08	1.82e-06	87	9339	387	76974	50	37
GO:0008037	cell recognition	biological_process	2.85e-08	3.11e-06	86	9339	388	76974	50	36
GO:0016482	cytoplasmic transport	biological_process	0.36998	1	115	9339	922	76974	50	65
GO:0004518	nuclease activity	molecular_function	0.41111	1	101	9339	818	76974	50	51
GO:0042623	ATPase activity, coupled	molecular_function	0.53044	1	86	9339	707	76974	50	36
GO:1902589	single-organism organelle organization	biological_process	0.97639	1	117	9339	1134	76974	50	67
GO:0016779	nucleotidyltransferase activity	molecular_function	0.99999	1	122	9339	1436	76974	50	72
GO:0016032	viral process	biological_process	0.62657	1	108	9339	915	76974	49	59
GO:0016627	oxidoreductase activity, acting on the CH-CH group of donors	molecular_function	0.0029843	0.10155	85	9339	523	76974	48	37
GO:0030246	carbohydrate binding	molecular_function	0.0092562	0.22877	89	9339	567	76974	48	41
GO:0051276	chromosome organization	biological_process	0.93225	1	100	9339	945	76974	48	52
GO:0016701	oxidoreductase activity, acting on single donors with incorporation of molecular oxygen	molecular_function	0.0048793	0.14411	72	9339	437	76974	47	25
GO:0042592	homeostatic process	biological_process	0.031395	0.50318	104	9339	751	76974	47	57
GO:0008092	cytoskeletal protein binding	molecular_function	0.059392	0.77337	134	9339	962	76974	47	87
GO:0005739	mitochondrion	cellular_component	0.68149	1	88	9339	774	76974	47	41
GO:0003678	DNA helicase activity	molecular_function	0.72649	1	88	9339	755	76974	46	42
GO:0044427	chromosomal part	cellular_component	0.86288	1	84	9339	770	76974	46	38
GO:0016820	hydrolase activity, acting on acid anhydrides, catalyzing transmembrane movement of substances	molecular_function	0.072833	0.83016	90	9339	638	76974	45	45
GO:0031975	envelope	cellular_component	0.64243	1	82	9339	709	76974	45	37
GO:0098772	molecular function regulator	molecular_function	0.77255	1	111	9339	985	76974	45	66
GO:0005856	cytoskeleton	cellular_component	0.88571	1	92	9339	842	76974	45	47
GO:0010333	terpene synthase activity	molecular_function	2.2e-08	2.67e-06	55	9339	210	76974	44	11
GO:0016838	carbon-oxygen lyase activity, acting on phosphates	molecular_function	1.2e-07	1.2e-05	57	9339	232	76974	44	13
GO:0044430	cytoskeletal part	cellular_component	0.81826	1	90	9339	802	76974	44	46
GO:0006952	defense response	biological_process	0.00030103	0.015366	77	9339	439	76974	43	34
GO:0006813	potassium ion transport	biological_process	0.027761	0.46131	65	9339	421	76974	43	22
GO:0032403	protein complex binding	molecular_function	0.11731	1	122	9339	902	76974	43	79
GO:0072330	monocarboxylic acid biosynthetic process	biological_process	8.71e-10	2.15e-07	100	9339	447	76974	42	58
GO:1902580	single-organism cellular localization	biological_process	0.38589	1	82	9339	660	76974	42	40
GO:0098805	whole membrane	cellular_component	0.43335	1	95	9339	770	76974	42	53
GO:0043038	amino acid activation	biological_process	0.61654	1	68	9339	567	76974	42	26
GO:0043039	tRNA aminoacylation	biological_process	0.61654	1	68	9339	567	76974	42	26
GO:0016875	ligase activity, forming carbon-oxygen bonds	molecular_function	0.71864	1	65	9339	560	76974	42	23
GO:0016876	ligase activity, forming aminoacyl-tRNA and related compounds	molecular_function	0.71864	1	65	9339	560	76974	42	23
GO:0009057	macromolecule catabolic process	biological_process	0.89677	1	91	9339	853	76974	42	49
GO:0016903	oxidoreductase activity, acting on the aldehyde or oxo group of donors	molecular_function	3.32e-05	0.0022624	55	9339	263	76974	41	14
GO:0071705	nitrogen compound transport	biological_process	0.073305	0.83351	80	9339	571	76974	41	39
GO:0008509	anion transmembrane transporter activity	molecular_function	0.32715	1	67	9339	521	76974	41	26
GO:0042578	phosphoric ester hydrolase activity	molecular_function	0.54751	1	109	9339	895	76974	41	68
GO:0019725	cellular homeostasis	biological_process	0.00080984	0.036219	90	9339	551	76974	40	50
GO:0006605	protein targeting	biological_process	0.38745	1	80	9339	643	76974	40	40
GO:0006418	tRNA aminoacylation for protein translation	biological_process	0.44247	1	66	9339	523	76974	40	26
GO:0030234	enzyme regulator activity	molecular_function	0.538	1	101	9339	849	76974	40	61
GO:0033365	protein localization to organelle	biological_process	0.55354	1	79	9339	663	76974	40	39
GO:0004812	aminoacyl-tRNA ligase activity	molecular_function	0.64898	1	63	9339	531	76974	40	23
GO:0032502	developmental process	biological_process	0.76517	1	84	9339	751	76974	40	44
GO:0098662	inorganic cation transmembrane transport	biological_process	0.82537	1	115	9339	1040	76974	40	75
GO:0098660	inorganic ion transmembrane transport	biological_process	0.82838	1	115	9339	1041	76974	40	75
GO:0098655	cation transmembrane transport	biological_process	0.83712	1	115	9339	1044	76974	40	75
GO:0019012	virion	cellular_component	0.95736	1	95	9339	919	76974	40	55
GO:0008289	lipid binding	molecular_function	0.023777	0.42455	86	9339	571	76974	39	47
GO:0042221	response to chemical	biological_process	0.088904	0.91372	99	9339	724	76974	39	60
GO:0072594	establishment of protein localization to organelle	biological_process	0.2526	1	77	9339	593	76974	39	38
GO:0070647	protein modification by small protein conjugation or removal	biological_process	0.55034	1	73	9339	597	76974	39	34
GO:0031967	organelle envelope	cellular_component	0.76999	1	75	9339	676	76974	39	36
GO:0005216	ion channel activity	molecular_function	0.80651	1	70	9339	631	76974	39	31
GO:0022838	substrate-specific channel activity	molecular_function	0.80651	1	70	9339	631	76974	39	31
GO:0015267	channel activity	molecular_function	0.80992	1	70	9339	632	76974	39	31
GO:0022803	passive transmembrane transporter activity	molecular_function	0.80992	1	70	9339	632	76974	39	31
GO:0006633	fatty acid biosynthetic process	biological_process	5.51e-09	1.04e-06	93	9339	420	76974	38	55
GO:0016209	antioxidant activity	molecular_function	0.014514	0.3185	67	9339	435	76974	38	29
GO:0044712	single-organism catabolic process	biological_process	0.42	1	88	9339	709	76974	38	50
GO:0005654	nucleoplasm	cellular_component	0.57698	1	91	9339	780	76974	38	53
GO:0044451	nucleoplasm part	cellular_component	0.57698	1	91	9339	780	76974	38	53
GO:0016702	oxidoreductase activity, acting on single donors with incorporation of molecular oxygen, incorporation of two atoms of oxygen	molecular_function	0.054032	0.74409	52	9339	341	76974	37	15
GO:0051213	dioxygenase activity	molecular_function	0.16138	1	52	9339	371	76974	37	15
GO:0019867	outer membrane	cellular_component	0.20199	1	62	9339	461	76974	37	25
GO:0009165	nucleotide biosynthetic process	biological_process	0.48028	1	76	9339	626	76974	37	39
GO:1901293	nucleoside phosphate biosynthetic process	biological_process	0.48028	1	76	9339	626	76974	37	39
GO:0044423	virion part	cellular_component	0.97039	1	89	9339	879	76974	37	52
GO:0015078	hydrogen ion transmembrane transporter activity	molecular_function	0.53248	1	95	9339	795	76974	36	59
GO:0044767	single-organism developmental process	biological_process	0.71934	1	79	9339	698	76974	36	43
GO:0008238	exopeptidase activity	molecular_function	0.75774	1	62	9339	548	76974	36	26
GO:0007264	small GTPase mediated signal transduction	biological_process	0.97042	1	69	9339	702	76974	36	33
GO:0009055	electron carrier activity	molecular_function	2.7e-05	0.0018633	86	9339	479	76974	35	51
GO:0009308	amine metabolic process	biological_process	0.017369	0.35464	52	9339	319	76974	35	17
GO:0030170	pyridoxal phosphate binding	molecular_function	0.026378	0.44719	63	9339	404	76974	35	28
GO:0071949	FAD binding	molecular_function	0.03947	0.59791	55	9339	355	76974	35	20
GO:0016791	phosphatase activity	molecular_function	0.24782	1	89	9339	676	76974	35	54
GO:0009378	four-way junction helicase activity	molecular_function	0.5212	1	67	9339	543	76974	35	32
GO:0015399	primary active transmembrane transporter activity	molecular_function	0.58752	1	69	9339	576	76974	35	34
GO:0015405	P-P-bond-hydrolysis-driven transmembrane transporter activity	molecular_function	0.58752	1	69	9339	576	76974	35	34
GO:0044421	extracellular region part	cellular_component	0.67093	1	69	9339	603	76974	35	34
GO:0005886	plasma membrane	cellular_component	0.95869	1	70	9339	712	76974	35	35
GO:0016853	isomerase activity	molecular_function	0.99665	1	80	9339	879	76974	35	45
GO:0042626	ATPase activity, coupled to transmembrane movement of substances	molecular_function	0.16059	1	65	9339	472	76974	34	31
GO:0043492	ATPase activity, coupled to movement of substances	molecular_function	0.16059	1	65	9339	472	76974	34	31
GO:0005102	receptor binding	molecular_function	0.27146	1	72	9339	550	76974	34	38
GO:0015698	inorganic anion transport	biological_process	0.36055	1	46	9339	354	76974	34	12
GO:0051246	regulation of protein metabolic process	biological_process	0.39967	1	69	9339	544	76974	34	35
GO:0022402	cell cycle process	biological_process	0.53802	1	79	9339	654	76974	34	45
GO:0000152	nuclear ubiquitin ligase complex	cellular_component	0.69118	1	63	9339	549	76974	34	29
GO:0005680	anaphase-promoting complex	cellular_component	0.69118	1	63	9339	549	76974	34	29
GO:0031461	cullin-RING ubiquitin ligase complex	cellular_component	0.69118	1	63	9339	549	76974	34	29
GO:0000151	ubiquitin ligase complex	cellular_component	0.76525	1	63	9339	563	76974	34	29
GO:0006914	autophagy	biological_process	0.91372	1	82	9339	774	76974	34	48
GO:0032268	regulation of cellular protein metabolic process	biological_process	0.53777	1	65	9339	533	76974	33	32
GO:0031966	mitochondrial membrane	cellular_component	0.64839	1	63	9339	551	76974	33	30
GO:0005740	mitochondrial envelope	cellular_component	0.67345	1	64	9339	565	76974	33	31
GO:0044429	mitochondrial part	cellular_component	0.75385	1	67	9339	607	76974	33	34
GO:0009451	RNA modification	biological_process	0.95508	1	77	9339	748	76974	33	44
GO:0016638	oxidoreductase activity, acting on the CH-NH2 group of donors	molecular_function	5.28e-05	0.0034951	52	9339	247	76974	32	20
GO:0022836	gated channel activity	molecular_function	0.22272	1	53	9339	393	76974	32	21
GO:0004252	serine-type endopeptidase activity	molecular_function	0.67854	1	66	9339	572	76974	32	34
GO:0019058	viral life cycle	biological_process	0.88323	1	67	9339	628	76974	32	35
GO:0044262	cellular carbohydrate metabolic process	biological_process	0.99937	1	84	9339	944	76974	32	52
GO:0005507	copper ion binding	molecular_function	0.046124	0.66645	49	9339	318	76974	31	18
GO:0048856	anatomical structure development	biological_process	0.22678	1	55	9339	412	76974	31	24
GO:0000988	transcription factor activity, protein binding	molecular_function	0.37156	1	67	9339	539	76974	31	36
GO:0005783	endoplasmic reticulum	cellular_component	0.93148	1	74	9339	728	76974	31	43
GO:0019028	viral capsid	cellular_component	0.93363	1	69	9339	669	76974	31	38
GO:0016051	carbohydrate biosynthetic process	biological_process	0.99991	1	73	9339	882	76974	31	42
GO:0006928	movement of cell or subcellular component	biological_process	0.0025655	0.088586	82	9339	496	76974	30	52
GO:0015074	DNA integration	biological_process	0.030634	0.49266	43	9339	261	76974	30	13
GO:0033013	tetrapyrrole metabolic process	biological_process	0.057284	0.76422	74	9339	510	76974	30	44
GO:0009607	response to biotic stimulus	biological_process	0.26999	1	55	9339	442	76974	30	25
GO:0044265	cellular macromolecule catabolic process	biological_process	0.8714	1	67	9339	628	76974	30	37
GO:0038023	signaling receptor activity	molecular_function	0.9963	1	53	9339	613	76974	30	23
GO:0004872	receptor activity	molecular_function	0.99899	1	53	9339	642	76974	30	23
GO:0016620	oxidoreductase activity, acting on the aldehyde or oxo group of donors, NAD or NADP as acceptor	molecular_function	0.00017021	0.0097479	39	9339	180	76974	29	10
GO:0045454	cell redox homeostasis	biological_process	0.00017451	0.0097557	70	9339	387	76974	29	41
GO:0015631	tubulin binding	molecular_function	0.00054867	0.026839	84	9339	480	76974	29	55
GO:0006733	oxidoreduction coenzyme metabolic process	biological_process	0.0098932	0.24072	55	9339	330	76974	29	26
GO:0015103	inorganic anion transmembrane transporter activity	molecular_function	0.20523	1	40	9339	284	76974	29	11
GO:0006417	regulation of translation	biological_process	0.26982	1	51	9339	378	76974	29	22
GO:0034248	regulation of cellular amide metabolic process	biological_process	0.26982	1	51	9339	378	76974	29	22
GO:0010608	posttranscriptional regulation of gene expression	biological_process	0.29645	1	51	9339	382	76974	29	22
GO:0006366	transcription from RNA polymerase II promoter	biological_process	0.44551	1	71	9339	582	76974	29	42
GO:0006164	purine nucleotide biosynthetic process	biological_process	0.54251	1	58	9339	488	76974	29	29
GO:0072522	purine-containing compound biosynthetic process	biological_process	0.60864	1	61	9339	523	76974	29	32
GO:1901659	glycosyl compound biosynthetic process	biological_process	0.64027	1	57	9339	499	76974	29	28
GO:0008134	transcription factor binding	molecular_function	0.73309	1	75	9339	650	76974	29	46
GO:0007186	G-protein coupled receptor signaling pathway	biological_process	0.81191	1	61	9339	571	76974	29	32
GO:0048193	Golgi vesicle transport	biological_process	0.8692	1	60	9339	558	76974	29	31
GO:0007010	cytoskeleton organization	biological_process	0.94573	1	71	9339	689	76974	29	42
GO:0030117	membrane coat	cellular_component	0.95001	1	76	9339	736	76974	29	47
GO:0048475	coated membrane	cellular_component	0.95001	1	76	9339	736	76974	29	47
GO:0061024	membrane organization	biological_process	0.96585	1	55	9339	568	76974	29	26
GO:0042451	purine nucleoside biosynthetic process	biological_process	0.46154	1	56	9339	459	76974	28	28
GO:0046129	purine ribonucleoside biosynthetic process	biological_process	0.46154	1	56	9339	459	76974	28	28
GO:0009152	purine ribonucleotide biosynthetic process	biological_process	0.52485	1	56	9339	469	76974	28	28
GO:0009260	ribonucleotide biosynthetic process	biological_process	0.56929	1	56	9339	476	76974	28	28
GO:0046390	ribose phosphate biosynthetic process	biological_process	0.56929	1	56	9339	476	76974	28	28
GO:0009163	nucleoside biosynthetic process	biological_process	0.68553	1	56	9339	498	76974	28	28
GO:0042455	ribonucleoside biosynthetic process	biological_process	0.68553	1	56	9339	498	76974	28	28
GO:0044707	single-multicellular organism process	biological_process	0.881	1	66	9339	624	76974	28	38
GO:0006818	hydrogen transport	biological_process	0.91511	1	91	9339	858	76974	28	63
GO:0015992	proton transport	biological_process	0.91511	1	91	9339	858	76974	28	63
GO:0006400	tRNA modification	biological_process	0.94047	1	59	9339	576	76974	28	31
GO:0006261	DNA-dependent DNA replication	biological_process	0.97023	1	43	9339	476	76974	28	15
GO:0016830	carbon-carbon lyase activity	molecular_function	0.9743	1	52	9339	550	76974	28	24
GO:0015979	photosynthesis	biological_process	0.0067154	0.17523	77	9339	504	76974	27	50
GO:0046034	ATP metabolic process	biological_process	0.58788	1	73	9339	620	76974	27	46
GO:0009126	purine nucleoside monophosphate metabolic process	biological_process	0.64012	1	76	9339	655	76974	27	49
GO:0009167	purine ribonucleoside monophosphate metabolic process	biological_process	0.64012	1	76	9339	655	76974	27	49
GO:0009161	ribonucleoside monophosphate metabolic process	biological_process	0.67482	1	76	9339	662	76974	27	49
GO:0009123	nucleoside monophosphate metabolic process	biological_process	0.68912	1	76	9339	665	76974	27	49
GO:0009141	nucleoside triphosphate metabolic process	biological_process	0.72038	1	73	9339	646	76974	27	46
GO:0009144	purine nucleoside triphosphate metabolic process	biological_process	0.72038	1	73	9339	646	76974	27	46
GO:0009199	ribonucleoside triphosphate metabolic process	biological_process	0.72038	1	73	9339	646	76974	27	46
GO:0009205	purine ribonucleoside triphosphate metabolic process	biological_process	0.72038	1	73	9339	646	76974	27	46
GO:0015291	secondary active transmembrane transporter activity	molecular_function	0.88708	1	56	9339	526	76974	27	29
GO:0044802	single-organism membrane organization	biological_process	0.95126	1	50	9339	512	76974	27	23
GO:0015849	organic acid transport	biological_process	0.20996	1	53	9339	396	76974	26	27
GO:0046942	carboxylic acid transport	biological_process	0.20996	1	53	9339	396	76974	26	27
GO:0015711	organic anion transport	biological_process	0.22149	1	53	9339	398	76974	26	27
GO:0032259	methylation	biological_process	0.27937	1	58	9339	450	76974	26	32
GO:0006270	DNA replication initiation	biological_process	0.58627	1	41	9339	347	76974	26	15
GO:0003724	RNA helicase activity	molecular_function	0.85435	1	59	9339	540	76974	26	33
GO:0009605	response to external stimulus	biological_process	0.91083	1	47	9339	482	76974	26	21
GO:0033865	nucleoside bisphosphate metabolic process	biological_process	0.00071953	0.033127	36	9339	170	76974	25	11
GO:0033875	ribonucleoside bisphosphate metabolic process	biological_process	0.00071953	0.033127	36	9339	170	76974	25	11
GO:0034032	purine nucleoside bisphosphate metabolic process	biological_process	0.00071953	0.033127	36	9339	170	76974	25	11
GO:0071554	cell wall organization or biogenesis	biological_process	0.00082191	0.036412	51	9339	270	76974	25	26
GO:0043648	dicarboxylic acid metabolic process	biological_process	0.0026812	0.091906	42	9339	226	76974	25	17
GO:0042440	pigment metabolic process	biological_process	0.014404	0.31757	52	9339	317	76974	25	27
GO:0001871	pattern binding	molecular_function	0.054572	0.74714	48	9339	311	76974	25	23
GO:0030247	polysaccharide binding	molecular_function	0.054572	0.74714	48	9339	311	76974	25	23
GO:0003712	transcription cofactor activity	molecular_function	0.13196	1	58	9339	423	76974	25	33
GO:0000989	transcription factor activity, transcription factor binding	molecular_function	0.14373	1	58	9339	426	76974	25	33
GO:0031012	extracellular matrix	cellular_component	0.23598	1	41	9339	310	76974	25	16
GO:0070008	serine-type exopeptidase activity	molecular_function	0.53463	1	49	9339	404	76974	25	24
GO:1902600	hydrogen ion transmembrane transport	biological_process	0.67148	1	80	9339	696	76974	25	55
GO:0042802	identical protein binding	molecular_function	0.70012	1	59	9339	510	76974	25	34
GO:0008237	metallopeptidase activity	molecular_function	0.99038	1	46	9339	504	76974	25	21
GO:0034637	cellular carbohydrate biosynthetic process	biological_process	0.99914	1	57	9339	676	76974	25	32
GO:0034062	RNA polymerase activity	molecular_function	0.99996	1	60	9339	789	76974	25	35
GO:0019362	pyridine nucleotide metabolic process	biological_process	0.01842	0.36653	48	9339	291	76974	24	24
GO:0046496	nicotinamide nucleotide metabolic process	biological_process	0.01842	0.36653	48	9339	291	76974	24	24
GO:0051536	iron-sulfur cluster binding	molecular_function	0.038635	0.59292	50	9339	324	76974	24	26
GO:0051540	metal cluster binding	molecular_function	0.038635	0.59292	50	9339	324	76974	24	26
GO:0072524	pyridine-containing compound metabolic process	biological_process	0.046599	0.67126	48	9339	309	76974	24	24
GO:0006778	porphyrin-containing compound metabolic process	biological_process	0.062985	0.7831	52	9339	347	76974	24	28
GO:0004601	peroxidase activity	molecular_function	0.076593	0.84036	37	9339	246	76974	24	13
GO:0017038	protein import	biological_process	0.083093	0.87884	50	9339	339	76974	24	26
GO:0016684	oxidoreductase activity, acting on peroxide as acceptor	molecular_function	0.10875	1	37	9339	254	76974	24	13
GO:0005578	proteinaceous extracellular matrix	cellular_component	0.16707	1	40	9339	291	76974	24	16
GO:0048869	cellular developmental process	biological_process	0.21158	1	47	9339	345	76974	24	23
GO:0000003	reproduction	biological_process	0.43918	1	55	9339	448	76974	24	31
GO:0016469	proton-transporting two-sector ATPase complex	cellular_component	0.52241	1	73	9339	611	76974	24	49
GO:0070085	glycosylation	biological_process	0.54309	1	51	9339	421	76974	24	27
GO:0045182	translation regulator activity	molecular_function	0.54363	1	40	9339	324	76974	24	16
GO:0008234	cysteine-type peptidase activity	molecular_function	0.56094	1	45	9339	379	76974	24	21
GO:0030163	protein catabolic process	biological_process	0.77474	1	53	9339	482	76974	24	29
GO:0048518	positive regulation of biological process	biological_process	0.97774	1	46	9339	495	76974	24	22
GO:0007017	microtubule-based process	biological_process	0.0080592	0.20347	76	9339	473	76974	23	53
GO:0016628	oxidoreductase activity, acting on the CH-CH group of donors, NAD or NADP as acceptor	molecular_function	0.13326	1	38	9339	262	76974	23	15
GO:0046700	heterocycle catabolic process	biological_process	0.16162	1	48	9339	346	76974	23	25
GO:0044270	cellular nitrogen compound catabolic process	biological_process	0.17382	1	49	9339	356	76974	23	26
GO:0019439	aromatic compound catabolic process	biological_process	0.18497	1	48	9339	349	76974	23	25
GO:1901361	organic cyclic compound catabolic process	biological_process	0.2363	1	48	9339	359	76974	23	25
GO:0040011	locomotion	biological_process	0.29612	1	54	9339	414	76974	23	31
GO:0016485	protein processing	biological_process	0.73599	1	51	9339	462	76974	23	28
GO:0051604	protein maturation	biological_process	0.73599	1	51	9339	462	76974	23	28
GO:0006352	DNA-templated transcription, initiation	biological_process	0.90439	1	48	9339	470	76974	23	25
GO:0016071	mRNA metabolic process	biological_process	0.99978	1	52	9339	652	76974	23	29
GO:0015936	coenzyme A metabolic process	biological_process	8.69e-05	0.0053717	32	9339	131	76974	22	10
GO:0000902	cell morphogenesis	biological_process	0.10111	0.98428	36	9339	239	76974	22	14
GO:0032989	cellular component morphogenesis	biological_process	0.10111	0.98428	36	9339	239	76974	22	14
GO:0016410	N-acyltransferase activity	molecular_function	0.22065	1	31	9339	224	76974	22	9
GO:0008135	translation factor activity, RNA binding	molecular_function	0.23032	1	49	9339	368	76974	22	27
GO:0004519	endonuclease activity	molecular_function	0.25837	1	50	9339	381	76974	22	28
GO:0009653	anatomical structure morphogenesis	biological_process	0.42253	1	38	9339	304	76974	22	16
GO:0000228	nuclear chromosome	cellular_component	0.4679	1	37	9339	300	76974	22	15
GO:0032446	protein modification by small protein conjugation	biological_process	0.58407	1	46	9339	382	76974	22	24
GO:0048519	negative regulation of biological process	biological_process	0.66105	1	53	9339	458	76974	22	31
GO:0000775	chromosome, centromeric region	cellular_component	0.97951	1	45	9339	483	76974	22	23
GO:0098687	chromosomal region	cellular_component	0.98509	1	45	9339	491	76974	22	23
GO:0045333	cellular respiration	biological_process	0.11881	1	47	9339	327	76974	21	26
GO:0003857	3-hydroxyacyl-CoA dehydrogenase activity	molecular_function	0.14793	1	37	9339	255	76974	21	16
GO:0015980	energy derivation by oxidation of organic compounds	biological_process	0.22266	1	49	9339	362	76974	21	28
GO:0042254	ribosome biogenesis	biological_process	0.25118	1	48	9339	361	76974	21	27
GO:0022613	ribonucleoprotein complex biogenesis	biological_process	0.39823	1	49	9339	390	76974	21	28
GO:0044257	cellular protein catabolic process	biological_process	0.91129	1	47	9339	464	76974	21	26
GO:0051603	proteolysis involved in cellular protein catabolic process	biological_process	0.91129	1	47	9339	464	76974	21	26
GO:0090150	establishment of protein localization to membrane	biological_process	0.9165	1	37	9339	377	76974	21	16
GO:0072657	protein localization to membrane	biological_process	0.92435	1	37	9339	380	76974	21	16
GO:0008171	O-methyltransferase activity	molecular_function	7.39e-05	0.004692	41	9339	188	76974	20	21
GO:0006720	isoprenoid metabolic process	biological_process	0.0002115	0.011287	36	9339	161	76974	20	16
GO:0015937	coenzyme A biosynthetic process	biological_process	0.0014898	0.059901	27	9339	122	76974	20	7
GO:0033866	nucleoside bisphosphate biosynthetic process	biological_process	0.0014898	0.059901	27	9339	122	76974	20	7
GO:0034030	ribonucleoside bisphosphate biosynthetic process	biological_process	0.0014898	0.059901	27	9339	122	76974	20	7
GO:0034033	purine nucleoside bisphosphate biosynthetic process	biological_process	0.0014898	0.059901	27	9339	122	76974	20	7
GO:0052689	carboxylic ester hydrolase activity	molecular_function	0.0054618	0.15735	62	9339	372	76974	20	42
GO:0016836	hydro-lyase activity	molecular_function	0.015318	0.32951	47	9339	282	76974	20	27
GO:0098519	nucleotide phosphatase activity, acting on free nucleotides	molecular_function	0.090328	0.92376	45	9339	299	76974	20	25
GO:0072509	divalent inorganic cation transmembrane transporter activity	molecular_function	0.099539	0.9779	35	9339	233	76974	20	15
GO:0006576	cellular biogenic amine metabolic process	biological_process	0.12458	1	35	9339	237	76974	20	15
GO:0044106	cellular amine metabolic process	biological_process	0.12458	1	35	9339	237	76974	20	15
GO:0000793	condensed chromosome	cellular_component	0.13702	1	37	9339	253	76974	20	17
GO:0048523	negative regulation of cellular process	biological_process	0.30256	1	47	9339	358	76974	20	27
GO:0015630	microtubule cytoskeleton	cellular_component	0.42958	1	49	9339	390	76974	20	29
GO:0016052	carbohydrate catabolic process	biological_process	0.61885	1	46	9339	392	76974	20	26
GO:0004527	exonuclease activity	molecular_function	0.70554	1	37	9339	328	76974	20	17
GO:0015297	antiporter activity	molecular_function	0.76705	1	43	9339	383	76974	20	23
GO:0002949	tRNA threonylcarbamoyladenosine modification	biological_process	0.8697	1	39	9339	369	76974	20	19
GO:0070525	tRNA threonylcarbamoyladenosine metabolic process	biological_process	0.8697	1	39	9339	369	76974	20	19
GO:0051301	cell division	biological_process	0.95722	1	37	9339	391	76974	20	17
GO:0044432	endoplasmic reticulum part	cellular_component	0.9701	1	44	9339	479	76974	20	24
GO:0048522	positive regulation of cellular process	biological_process	0.98493	1	42	9339	467	76974	20	22
GO:0005976	polysaccharide metabolic process	biological_process	0.99962	1	55	9339	678	76974	20	35
GO:0045229	external encapsulating structure organization	biological_process	0.00017257	0.0097557	40	9339	184	76974	19	21
GO:0008299	isoprenoid biosynthetic process	biological_process	0.00022346	0.011665	34	9339	149	76974	19	15
GO:0071555	cell wall organization	biological_process	0.00022356	0.011665	39	9339	180	76974	19	20
GO:0003333	amino acid transmembrane transport	biological_process	0.044323	0.64538	36	9339	222	76974	19	17
GO:1903825	organic acid transmembrane transport	biological_process	0.053837	0.74359	36	9339	226	76974	19	17
GO:0098656	anion transmembrane transport	biological_process	0.056829	0.76031	36	9339	227	76974	19	17
GO:0006865	amino acid transport	biological_process	0.13474	1	37	9339	254	76974	19	18
GO:0006979	response to oxidative stress	biological_process	0.18668	1	32	9339	235	76974	19	13
GO:0004497	monooxygenase activity	molecular_function	0.26194	1	31	9339	225	76974	19	12
GO:0008080	N-acetyltransferase activity	molecular_function	0.33163	1	26	9339	198	76974	19	7
GO:1901565	organonitrogen compound catabolic process	biological_process	0.35786	1	42	9339	329	76974	19	23
GO:0000160	phosphorelay signal transduction system	biological_process	0.40404	1	41	9339	321	76974	19	22
GO:0016407	acetyltransferase activity	molecular_function	0.51897	1	26	9339	218	76974	19	7
GO:0016567	protein ubiquitination	biological_process	0.64437	1	42	9339	357	76974	19	23
GO:0004190	aspartic-type endopeptidase activity	molecular_function	0.924	1	46	9339	469	76974	19	27
GO:0070001	aspartic-type peptidase activity	molecular_function	0.924	1	46	9339	469	76974	19	27
GO:0016831	carboxy-lyase activity	molecular_function	0.98166	1	38	9339	426	76974	19	19
GO:0003899	DNA-directed RNA polymerase activity	molecular_function	0.99995	1	47	9339	653	76974	19	28
GO:0006606	protein import into nucleus	biological_process	0.015742	0.32951	38	9339	219	76974	18	20
GO:0034504	protein localization to nucleus	biological_process	0.015742	0.32951	38	9339	219	76974	18	20
GO:0044744	protein targeting to nucleus	biological_process	0.015742	0.32951	38	9339	219	76974	18	20
GO:0051170	nuclear import	biological_process	0.015742	0.32951	38	9339	219	76974	18	20
GO:1902593	single-organism nuclear import	biological_process	0.015742	0.32951	38	9339	219	76974	18	20
GO:0003774	motor activity	molecular_function	0.019473	0.37736	54	9339	331	76974	18	36
GO:1901681	sulfur compound binding	molecular_function	0.036803	0.57802	31	9339	183	76974	18	13
GO:0006357	regulation of transcription from RNA polymerase II promoter	biological_process	0.05259	0.73283	48	9339	321	76974	18	30
GO:0006913	nucleocytoplasmic transport	biological_process	0.064847	0.7951	42	9339	273	76974	18	24
GO:0009067	aspartate family amino acid biosynthetic process	biological_process	0.074116	0.83665	30	9339	189	76974	18	12
GO:0051169	nuclear transport	biological_process	0.077828	0.84036	42	9339	277	76974	18	24
GO:0009066	aspartate family amino acid metabolic process	biological_process	0.15135	1	33	9339	226	76974	18	15
GO:0006364	rRNA processing	biological_process	0.19923	1	38	9339	273	76974	18	20
GO:0016072	rRNA metabolic process	biological_process	0.19923	1	38	9339	273	76974	18	20
GO:0033014	tetrapyrrole biosynthetic process	biological_process	0.30609	1	48	9339	366	76974	18	30
GO:0005741	mitochondrial outer membrane	cellular_component	0.36065	1	31	9339	240	76974	18	13
GO:0031968	organelle outer membrane	cellular_component	0.36065	1	31	9339	240	76974	18	13
GO:0009892	negative regulation of metabolic process	biological_process	0.38408	1	42	9339	328	76974	18	24
GO:0044454	nuclear chromosome part	cellular_component	0.63111	1	31	9339	269	76974	18	13
GO:0036459	ubiquitinyl hydrolase activity	molecular_function	0.65964	1	29	9339	249	76974	18	11
GO:0005938	cell cortex	cellular_component	0.66007	1	32	9339	275	76974	18	14
GO:0004180	carboxypeptidase activity	molecular_function	0.67294	1	34	9339	298	76974	18	16
GO:0044448	cell cortex part	cellular_component	0.67921	1	31	9339	269	76974	18	13
GO:0032940	secretion by cell	biological_process	0.77211	1	37	9339	336	76974	18	19
GO:0046903	secretion	biological_process	0.79324	1	37	9339	340	76974	18	19
GO:0006325	chromatin organization	biological_process	0.81413	1	37	9339	351	76974	18	19
GO:0030684	preribosome	cellular_component	0.81808	1	26	9339	248	76974	18	8
GO:0061695	transferase complex, transferring phosphorus-containing groups	cellular_component	0.8961	1	45	9339	441	76974	18	27
GO:0006511	ubiquitin-dependent protein catabolic process	biological_process	0.91625	1	40	9339	400	76974	18	22
GO:0019941	modification-dependent protein catabolic process	biological_process	0.92176	1	40	9339	402	76974	18	22
GO:0043632	modification-dependent macromolecule catabolic process	biological_process	0.92176	1	40	9339	402	76974	18	22
GO:0043566	structure-specific DNA binding	molecular_function	0.94584	1	36	9339	371	76974	18	18
GO:0051258	protein polymerization	biological_process	0.96151	1	30	9339	325	76974	18	12
GO:0060589	nucleoside-triphosphatase regulator activity	molecular_function	0.9619	1	30	9339	330	76974	18	12
GO:0006644	phospholipid metabolic process	biological_process	0.99882	1	30	9339	401	76974	18	12
GO:0008194	UDP-glycosyltransferase activity	molecular_function	1	1	46	9339	732	76974	18	28
GO:0006547	histidine metabolic process	biological_process	2.22e-08	2.67e-06	47	9339	168	76974	17	30
GO:0052803	imidazole-containing compound metabolic process	biological_process	2.22e-08	2.67e-06	47	9339	168	76974	17	30
GO:0000105	histidine biosynthetic process	biological_process	1.52e-07	1.45e-05	44	9339	162	76974	17	27
GO:0019684	photosynthesis, light reaction	biological_process	0.00048939	0.024191	29	9339	126	76974	17	12
GO:0004559	alpha-mannosidase activity	molecular_function	0.0015838	0.061772	24	9339	103	76974	17	7
GO:0030312	external encapsulating structure	cellular_component	0.0019024	0.070418	51	9339	281	76974	17	34
GO:0004857	enzyme inhibitor activity	molecular_function	0.0024863	0.087131	52	9339	300	76974	17	35
GO:0008017	microtubule binding	molecular_function	0.003224	0.10892	60	9339	344	76974	17	43
GO:0016641	oxidoreductase activity, acting on the CH-NH2 group of donors, oxygen as acceptor	molecular_function	0.0042651	0.13442	21	9339	95	76974	17	4
GO:0015923	mannosidase activity	molecular_function	0.0096791	0.23798	26	9339	131	76974	17	9
GO:0019842	vitamin binding	molecular_function	0.2091	1	24	9339	164	76974	17	7
GO:0010605	negative regulation of macromolecule metabolic process	biological_process	0.28676	1	41	9339	306	76974	17	24
GO:0015988	energy coupled proton transmembrane transport, against electrochemical gradient	biological_process	0.41502	1	54	9339	433	76974	17	37
GO:0015991	ATP hydrolysis coupled proton transport	biological_process	0.41502	1	54	9339	433	76974	17	37
GO:0016579	protein deubiquitination	biological_process	0.50252	1	27	9339	215	76974	17	10
GO:0070646	protein modification by small protein removal	biological_process	0.50252	1	27	9339	215	76974	17	10
GO:0016879	ligase activity, forming carbon-nitrogen bonds	molecular_function	0.52773	1	33	9339	269	76974	17	16
GO:0004185	serine-type carboxypeptidase activity	molecular_function	0.5692	1	33	9339	277	76974	17	16
GO:0016568	chromatin modification	biological_process	0.71042	1	33	9339	298	76974	17	16
GO:0004540	ribonuclease activity	molecular_function	0.79724	1	37	9339	344	76974	17	20
GO:0009893	positive regulation of metabolic process	biological_process	0.96346	1	33	9339	356	76974	17	16
GO:0005789	endoplasmic reticulum membrane	cellular_component	0.98878	1	39	9339	456	76974	17	22
GO:0042175	nuclear outer membrane-endoplasmic reticulum membrane network	cellular_component	0.99139	1	39	9339	462	76974	17	22
GO:0010207	photosystem II assembly	biological_process	1.38e-05	0.0010284	19	9339	55	76974	16	3
GO:0019080	viral gene expression	biological_process	0.012227	0.28285	23	9339	115	76974	16	7
GO:0044033	multi-organism metabolic process	biological_process	0.025739	0.44387	23	9339	123	76974	16	7
GO:0005543	phospholipid binding	molecular_function	0.0511	0.72279	35	9339	216	76974	16	19
GO:0048870	cell motility	biological_process	0.16787	1	40	9339	281	76974	16	24
GO:0051674	localization of cell	biological_process	0.16787	1	40	9339	281	76974	16	24
GO:0005244	voltage-gated ion channel activity	molecular_function	0.17821	1	24	9339	161	76974	16	8
GO:0022832	voltage-gated channel activity	molecular_function	0.17821	1	24	9339	161	76974	16	8
GO:0016597	amino acid binding	molecular_function	0.25936	1	31	9339	224	76974	16	15
GO:0004616	phosphogluconate dehydrogenase (decarboxylating) activity	molecular_function	0.26092	1	29	9339	211	76974	16	13
GO:0031406	carboxylic acid binding	molecular_function	0.30119	1	31	9339	229	76974	16	15
GO:0043177	organic acid binding	molecular_function	0.30119	1	31	9339	229	76974	16	15
GO:0006575	cellular modified amino acid metabolic process	biological_process	0.36973	1	35	9339	270	76974	16	19
GO:0015276	ligand-gated ion channel activity	molecular_function	0.41756	1	29	9339	229	76974	16	13
GO:0022834	ligand-gated channel activity	molecular_function	0.41756	1	29	9339	229	76974	16	13
GO:0016893	endonuclease activity, active with either ribo- or deoxyribonucleic acids and producing 5'-phosphomonoesters	molecular_function	0.43787	1	26	9339	206	76974	16	10
GO:0016810	hydrolase activity, acting on carbon-nitrogen (but not peptide) bonds	molecular_function	0.4991	1	32	9339	264	76974	16	16
GO:0031683	G-protein beta/gamma-subunit complex binding	molecular_function	0.57563	1	32	9339	271	76974	16	16
GO:0043414	macromolecule methylation	biological_process	0.72771	1	40	9339	366	76974	16	24
GO:0006613	cotranslational protein targeting to membrane	biological_process	0.78448	1	28	9339	265	76974	16	12
GO:0006614	SRP-dependent cotranslational protein targeting to membrane	biological_process	0.78448	1	28	9339	265	76974	16	12
GO:0045047	protein targeting to ER	biological_process	0.80864	1	28	9339	269	76974	16	12
GO:0072599	establishment of protein localization to endoplasmic reticulum	biological_process	0.80864	1	28	9339	269	76974	16	12
GO:0006612	protein targeting to membrane	biological_process	0.81929	1	28	9339	271	76974	16	12
GO:0009311	oligosaccharide metabolic process	biological_process	0.82292	1	42	9339	389	76974	16	26
GO:0070972	protein localization to endoplasmic reticulum	biological_process	0.9326	1	28	9339	299	76974	16	12
GO:0004673	protein histidine kinase activity	molecular_function	0.94021	1	24	9339	257	76974	16	8
GO:0016775	phosphotransferase activity, nitrogenous group as acceptor	molecular_function	0.94021	1	24	9339	257	76974	16	8
GO:0003690	double-stranded DNA binding	molecular_function	0.97045	1	26	9339	291	76974	16	10
GO:0004222	metalloendopeptidase activity	molecular_function	0.97945	1	29	9339	327	76974	16	13
GO:0004888	transmembrane signaling receptor activity	molecular_function	0.97968	1	31	9339	364	76974	16	15
GO:0006457	protein folding	biological_process	0.99827	1	39	9339	489	76974	16	23
GO:0008839	4-hydroxy-tetrahydrodipicolinate reductase	molecular_function	0.0022893	0.081442	21	9339	92	76974	15	6
GO:0030258	lipid modification	biological_process	0.0045641	0.13918	28	9339	138	76974	15	13
GO:0009064	glutamine family amino acid metabolic process	biological_process	0.01974	0.37736	35	9339	202	76974	15	20
GO:0009085	lysine biosynthetic process	biological_process	0.068047	0.81065	21	9339	125	76974	15	6
GO:0009089	lysine biosynthetic process via diaminopimelate	biological_process	0.068047	0.81065	21	9339	125	76974	15	6
GO:0046451	diaminopimelate metabolic process	biological_process	0.068047	0.81065	21	9339	125	76974	15	6
GO:0016763	transferase activity, transferring pentosyl groups	molecular_function	0.12166	1	22	9339	139	76974	15	7
GO:0031324	negative regulation of cellular metabolic process	biological_process	0.13204	1	35	9339	237	76974	15	20
GO:0006553	lysine metabolic process	biological_process	0.13242	1	23	9339	150	76974	15	8
GO:0044724	single-organism carbohydrate catabolic process	biological_process	0.18884	1	34	9339	239	76974	15	19
GO:0008757	S-adenosylmethionine-dependent methyltransferase activity	molecular_function	0.34602	1	44	9339	340	76974	15	29
GO:0065009	regulation of molecular function	biological_process	0.36421	1	29	9339	224	76974	15	14
GO:0048285	organelle fission	biological_process	0.55547	1	29	9339	245	76974	15	14
GO:0019954	asexual reproduction	biological_process	0.57522	1	30	9339	258	76974	15	15
GO:0006887	exocytosis	biological_process	0.64711	1	29	9339	247	76974	15	14
GO:0042157	lipoprotein metabolic process	biological_process	0.72099	1	30	9339	275	76974	15	15
GO:0007275	multicellular organismal development	biological_process	0.75141	1	36	9339	332	76974	15	21
GO:0032040	small-subunit processome	cellular_component	0.77027	1	23	9339	214	76974	15	8
GO:0005743	mitochondrial inner membrane	cellular_component	0.80057	1	32	9339	308	76974	15	17
GO:0019866	organelle inner membrane	cellular_component	0.85806	1	32	9339	319	76974	15	17
GO:0007059	chromosome segregation	biological_process	0.8595	1	33	9339	320	76974	15	18
GO:0007155	cell adhesion	biological_process	0.90115	1	30	9339	302	76974	15	15
GO:0022610	biological adhesion	biological_process	0.9109	1	31	9339	314	76974	15	16
GO:0005794	Golgi apparatus	cellular_component	0.91414	1	32	9339	324	76974	15	17
GO:0000428	DNA-directed RNA polymerase complex	cellular_component	0.91971	1	33	9339	341	76974	15	18
GO:0030880	RNA polymerase complex	cellular_component	0.91971	1	33	9339	341	76974	15	18
GO:0055029	nuclear DNA-directed RNA polymerase complex	cellular_component	0.91971	1	33	9339	341	76974	15	18
GO:0051082	unfolded protein binding	molecular_function	0.95631	1	43	9339	446	76974	15	28
GO:0009101	glycoprotein biosynthetic process	biological_process	0.98414	1	32	9339	364	76974	15	17
GO:0044459	plasma membrane part	cellular_component	0.98481	1	38	9339	437	76974	15	23
GO:0009100	glycoprotein metabolic process	biological_process	0.98487	1	32	9339	365	76974	15	17
GO:0044264	cellular polysaccharide metabolic process	biological_process	0.99887	1	44	9339	545	76974	15	29
GO:0004594	pantothenate kinase activity	molecular_function	9.7e-06	0.00074686	19	9339	53	76974	14	5
GO:0019083	viral transcription	biological_process	0.0067168	0.17523	19	9339	85	76974	14	5
GO:0004571	mannosyl-oligosaccharide 1,2-alpha-mannosidase activity	molecular_function	0.0089473	0.22231	15	9339	63	76974	14	1
GO:0015924	mannosyl-oligosaccharide mannosidase activity	molecular_function	0.0089473	0.22231	15	9339	63	76974	14	1
GO:0048038	quinone binding	molecular_function	0.025639	0.44387	20	9339	103	76974	14	6
GO:0019898	extrinsic component of membrane	cellular_component	0.02783	0.46131	43	9339	270	76974	14	29
GO:0001076	transcription factor activity, RNA polymerase II transcription factor binding	molecular_function	0.069687	0.81405	40	9339	269	76974	14	26
GO:0001104	RNA polymerase II transcription cofactor activity	molecular_function	0.069687	0.81405	40	9339	269	76974	14	26
GO:0016592	mediator complex	cellular_component	0.076312	0.84036	40	9339	271	76974	14	26
GO:0030976	thiamine pyrophosphate binding	molecular_function	0.11974	1	21	9339	130	76974	14	7
GO:0033178	proton-transporting two-sector ATPase complex, catalytic domain	cellular_component	0.13308	1	32	9339	218	76974	14	18
GO:0006096	glycolytic process	biological_process	0.13428	1	32	9339	215	76974	14	18
GO:0006757	ATP generation from ADP	biological_process	0.13428	1	32	9339	215	76974	14	18
GO:0009135	purine nucleoside diphosphate metabolic process	biological_process	0.13428	1	32	9339	215	76974	14	18
GO:0009179	purine ribonucleoside diphosphate metabolic process	biological_process	0.13428	1	32	9339	215	76974	14	18
GO:0009185	ribonucleoside diphosphate metabolic process	biological_process	0.13428	1	32	9339	215	76974	14	18
GO:0046031	ADP metabolic process	biological_process	0.13428	1	32	9339	215	76974	14	18
GO:0006090	pyruvate metabolic process	biological_process	0.15185	1	32	9339	218	76974	14	18
GO:0004536	deoxyribonuclease activity	molecular_function	0.21712	1	28	9339	199	76974	14	14
GO:0042398	cellular modified amino acid biosynthetic process	biological_process	0.29921	1	30	9339	221	76974	14	16
GO:0006165	nucleoside diphosphate phosphorylation	biological_process	0.31431	1	32	9339	241	76974	14	18
GO:0009132	nucleoside diphosphate metabolic process	biological_process	0.31431	1	32	9339	241	76974	14	18
GO:0046939	nucleotide phosphorylation	biological_process	0.31431	1	32	9339	241	76974	14	18
GO:0043093	FtsZ-dependent cytokinesis	biological_process	0.35839	1	27	9339	206	76974	14	13
GO:0032505	reproduction of a single-celled organism	biological_process	0.36851	1	27	9339	207	76974	14	13
GO:0033176	proton-transporting V-type ATPase complex	cellular_component	0.39978	1	49	9339	388	76974	14	35
GO:0032506	cytokinetic process	biological_process	0.47033	1	27	9339	217	76974	14	13
GO:0090529	cell septum assembly	biological_process	0.47033	1	27	9339	217	76974	14	13
GO:0000910	cytokinesis	biological_process	0.52175	1	27	9339	222	76974	14	13
GO:0016591	DNA-directed RNA polymerase II, holoenzyme	cellular_component	0.84449	1	29	9339	282	76974	14	15
GO:0000776	kinetochore	cellular_component	0.88561	1	33	9339	326	76974	14	19
GO:0005057	receptor signaling protein activity	molecular_function	0.95458	1	22	9339	243	76974	14	8
GO:0031325	positive regulation of cellular metabolic process	biological_process	0.97759	1	30	9339	339	76974	14	16
GO:0070925	organelle assembly	biological_process	0.99476	1	27	9339	342	76974	14	13
GO:0006073	cellular glucan metabolic process	biological_process	0.99929	1	41	9339	524	76974	14	27
GO:0044042	glucan metabolic process	biological_process	0.99929	1	41	9339	524	76974	14	27
GO:0033692	cellular polysaccharide biosynthetic process	biological_process	0.99987	1	33	9339	468	76974	14	19
GO:0006397	mRNA processing	biological_process	0.99988	1	36	9339	498	76974	14	22
GO:0000271	polysaccharide biosynthetic process	biological_process	0.9999	1	33	9339	473	76974	14	19
GO:0046527	glucosyltransferase activity	molecular_function	0.99999	1	38	9339	563	76974	14	24
GO:0009084	glutamine family amino acid biosynthetic process	biological_process	0.00048407	0.024183	28	9339	120	76974	13	15
GO:0005199	structural constituent of cell wall	molecular_function	0.0043766	0.13442	15	9339	62	76974	13	2
GO:0009664	plant-type cell wall organization	biological_process	0.0056119	0.1578	14	9339	57	76974	13	1
GO:0071669	plant-type cell wall organization or biogenesis	biological_process	0.0056119	0.1578	14	9339	57	76974	13	1
GO:0008131	primary amine oxidase activity	molecular_function	0.019575	0.37736	15	9339	69	76974	13	2
GO:0010033	response to organic substance	biological_process	0.02371	0.42455	45	9339	278	76974	13	32
GO:0010558	negative regulation of macromolecule biosynthetic process	biological_process	0.055878	0.75404	27	9339	161	76974	13	14
GO:0031327	negative regulation of cellular biosynthetic process	biological_process	0.055878	0.75404	27	9339	161	76974	13	14
GO:0051172	negative regulation of nitrogen compound metabolic process	biological_process	0.055878	0.75404	27	9339	161	76974	13	14
GO:2000113	negative regulation of cellular macromolecule biosynthetic process	biological_process	0.055878	0.75404	27	9339	161	76974	13	14
GO:0043900	regulation of multi-organism process	biological_process	0.061099	0.77337	17	9339	95	76974	13	4
GO:0009890	negative regulation of biosynthetic process	biological_process	0.063418	0.78372	27	9339	163	76974	13	14
GO:0045934	negative regulation of nucleobase-containing compound metabolic process	biological_process	0.15286	1	22	9339	143	76974	13	9
GO:0046148	pigment biosynthetic process	biological_process	0.19404	1	27	9339	186	76974	13	14
GO:0010629	negative regulation of gene expression	biological_process	0.25575	1	31	9339	223	76974	13	18
GO:0005819	spindle	cellular_component	0.3107	1	32	9339	238	76974	13	19
GO:0005815	microtubule organizing center	cellular_component	0.32169	1	28	9339	207	76974	13	15
GO:0010876	lipid localization	biological_process	0.38033	1	27	9339	210	76974	13	14
GO:0048583	regulation of response to stimulus	biological_process	0.55696	1	28	9339	234	76974	13	15
GO:0000280	nuclear division	biological_process	0.57866	1	25	9339	211	76974	13	12
GO:0042995	cell projection	cellular_component	0.62474	1	36	9339	307	76974	13	23
GO:0005261	cation channel activity	molecular_function	0.80236	1	24	9339	234	76974	13	11
GO:0030695	GTPase regulator activity	molecular_function	0.89789	1	19	9339	198	76974	13	6
GO:0046486	glycerolipid metabolic process	biological_process	0.90362	1	28	9339	289	76974	13	15
GO:0046488	phosphatidylinositol metabolic process	biological_process	0.96478	1	20	9339	237	76974	13	7
GO:0000155	phosphorelay sensor kinase activity	molecular_function	0.96828	1	19	9339	221	76974	13	6
GO:0044431	Golgi apparatus part	cellular_component	0.97585	1	26	9339	298	76974	13	13
GO:0006486	protein glycosylation	biological_process	0.9874	1	29	9339	340	76974	13	16
GO:0043413	macromolecule glycosylation	biological_process	0.9874	1	29	9339	340	76974	13	16
GO:0006650	glycerophospholipid metabolic process	biological_process	0.98866	1	21	9339	268	76974	13	8
GO:0009250	glucan biosynthetic process	biological_process	0.99993	1	30	9339	447	76974	13	17
GO:0015996	chlorophyll catabolic process	biological_process	0.0055654	0.1578	25	9339	123	76974	12	13
GO:0047746	chlorophyllase activity	molecular_function	0.0055654	0.1578	25	9339	123	76974	12	13
GO:0006721	terpenoid metabolic process	biological_process	0.0057574	0.15998	22	9339	102	76974	12	10
GO:0016114	terpenoid biosynthetic process	biological_process	0.0057574	0.15998	22	9339	102	76974	12	10
GO:0046149	pigment catabolic process	biological_process	0.0067922	0.17622	25	9339	125	76974	12	13
GO:0015994	chlorophyll metabolic process	biological_process	0.0071495	0.18347	26	9339	132	76974	12	14
GO:0006787	porphyrin-containing compound catabolic process	biological_process	0.012348	0.28286	25	9339	131	76974	12	13
GO:0033015	tetrapyrrole catabolic process	biological_process	0.012348	0.28286	25	9339	131	76974	12	13
GO:0051187	cofactor catabolic process	biological_process	0.013571	0.30347	25	9339	132	76974	12	13
GO:0016624	oxidoreductase activity, acting on the aldehyde or oxo group of donors, disulfide as acceptor	molecular_function	0.016598	0.34187	16	9339	74	76974	12	4
GO:0016679	oxidoreductase activity, acting on diphenols and related substances as donors	molecular_function	0.021952	0.40745	22	9339	119	76974	12	10
GO:0008272	sulfate transport	biological_process	0.038584	0.59292	16	9339	82	76974	12	4
GO:0015116	sulfate transmembrane transporter activity	molecular_function	0.038584	0.59292	16	9339	82	76974	12	4
GO:1901682	sulfur compound transmembrane transporter activity	molecular_function	0.038584	0.59292	16	9339	82	76974	12	4
GO:0072348	sulfur compound transport	biological_process	0.041863	0.61591	16	9339	83	76974	12	4
GO:0034357	photosynthetic membrane	cellular_component	0.060829	0.77337	60	9339	429	76974	12	48
GO:0009579	thylakoid	cellular_component	0.071312	0.8148	61	9339	441	76974	12	49
GO:0044436	thylakoid part	cellular_component	0.071312	0.8148	61	9339	441	76974	12	49
GO:0006479	protein methylation	biological_process	0.091668	0.92376	26	9339	163	76974	12	14
GO:0008213	protein alkylation	biological_process	0.091668	0.92376	26	9339	163	76974	12	14
GO:0019783	ubiquitin-like protein-specific protease activity	molecular_function	0.13669	1	16	9339	98	76974	12	4
GO:0005247	voltage-gated chloride channel activity	molecular_function	0.15893	1	16	9339	99	76974	12	4
GO:0005253	anion channel activity	molecular_function	0.15893	1	16	9339	99	76974	12	4
GO:0005254	chloride channel activity	molecular_function	0.15893	1	16	9339	99	76974	12	4
GO:0008308	voltage-gated anion channel activity	molecular_function	0.15893	1	16	9339	99	76974	12	4
GO:0015108	chloride transmembrane transporter activity	molecular_function	0.15893	1	16	9339	99	76974	12	4
GO:0006821	chloride transport	biological_process	0.2412	1	16	9339	107	76974	12	4
GO:0006783	heme biosynthetic process	biological_process	0.24535	1	24	9339	169	76974	12	12
GO:0016645	oxidoreductase activity, acting on the CH-NH group of donors	molecular_function	0.31498	1	25	9339	184	76974	12	13
GO:0006869	lipid transport	biological_process	0.31956	1	26	9339	196	76974	12	14
GO:0042168	heme metabolic process	biological_process	0.32189	1	24	9339	177	76974	12	12
GO:0006779	porphyrin-containing compound biosynthetic process	biological_process	0.4572	1	26	9339	206	76974	12	14
GO:0016023	cytoplasmic membrane-bounded vesicle	cellular_component	0.53256	1	42	9339	343	76974	12	30
GO:0009312	oligosaccharide biosynthetic process	biological_process	0.53906	1	29	9339	241	76974	12	17
GO:0005516	calmodulin binding	molecular_function	0.54514	1	17	9339	138	76974	12	5
GO:0031988	membrane-bounded vesicle	cellular_component	0.56343	1	42	9339	347	76974	12	30
GO:0098813	nuclear chromosome segregation	biological_process	0.56516	1	26	9339	218	76974	12	14
GO:0008514	organic anion transmembrane transporter activity	molecular_function	0.57049	1	27	9339	230	76974	12	15
GO:0031410	cytoplasmic vesicle	cellular_component	0.57141	1	42	9339	348	76974	12	30
GO:0000226	microtubule cytoskeleton organization	biological_process	0.58283	1	34	9339	285	76974	12	22
GO:0005342	organic acid transmembrane transporter activity	molecular_function	0.59688	1	24	9339	208	76974	12	12
GO:0046943	carboxylic acid transmembrane transporter activity	molecular_function	0.59688	1	24	9339	208	76974	12	12
GO:0031982	vesicle	cellular_component	0.60147	1	42	9339	352	76974	12	30
GO:0015171	amino acid transmembrane transporter activity	molecular_function	0.60583	1	20	9339	172	76974	12	8
GO:0007005	mitochondrion organization	biological_process	0.74068	1	26	9339	239	76974	12	14
GO:0090575	RNA polymerase II transcription factor complex	cellular_component	0.77279	1	24	9339	225	76974	12	12
GO:0004177	aminopeptidase activity	molecular_function	0.80068	1	16	9339	154	76974	12	4
GO:0042803	protein homodimerization activity	molecular_function	0.81848	1	34	9339	319	76974	12	22
GO:0044798	nuclear transcription factor complex	cellular_component	0.84157	1	24	9339	238	76974	12	12
GO:0008408	3'-5' exonuclease activity	molecular_function	0.84219	1	19	9339	189	76974	12	7
GO:0003779	actin binding	molecular_function	0.86522	1	38	9339	365	76974	12	26
GO:0005667	transcription factor complex	cellular_component	0.89111	1	24	9339	248	76974	12	12
GO:0009894	regulation of catabolic process	biological_process	0.89264	1	33	9339	326	76974	12	21
GO:0008565	protein transporter activity	molecular_function	0.9859	1	23	9339	287	76974	12	11
GO:0098798	mitochondrial protein complex	cellular_component	0.99086	1	26	9339	327	76974	12	14
GO:0044455	mitochondrial membrane part	cellular_component	0.99297	1	26	9339	332	76974	12	14
GO:0009405	pathogenesis	biological_process	0.99963	1	32	9339	456	76974	12	20
GO:0004315	3-oxoacyl-[acyl-carrier-protein] synthase activity	molecular_function	2.52e-06	0.00022346	27	9339	86	76974	11	16
GO:0004312	fatty acid synthase activity	molecular_function	3.24e-06	0.0002817	27	9339	87	76974	11	16
GO:0003777	microtubule motor activity	molecular_function	9.56e-05	0.0058277	40	9339	176	76974	11	29
GO:0007018	microtubule-based movement	biological_process	0.00010608	0.0063868	40	9339	177	76974	11	29
GO:0030259	lipid glycosylation	biological_process	0.00014589	0.0084578	22	9339	79	76974	11	11
GO:0046782	regulation of viral transcription	biological_process	0.0015156	0.059901	12	9339	38	76974	11	1
GO:1903900	regulation of viral life cycle	biological_process	0.0015156	0.059901	12	9339	38	76974	11	1
GO:0050792	regulation of viral process	biological_process	0.0068941	0.17788	12	9339	45	76974	11	1
GO:0043903	regulation of symbiosis, encompassing mutualism through parasitism	biological_process	0.0099624	0.24115	12	9339	47	76974	11	1
GO:0016790	thiolester hydrolase activity	molecular_function	0.03464	0.54866	24	9339	135	76974	11	13
GO:0009725	response to hormone	biological_process	0.044391	0.64538	34	9339	211	76974	11	23
GO:0009521	photosystem	cellular_component	0.050186	0.71416	57	9339	401	76974	11	46
GO:0009719	response to endogenous stimulus	biological_process	0.069081	0.81232	34	9339	219	76974	11	23
GO:0035091	phosphatidylinositol binding	molecular_function	0.1052	1	16	9339	93	76974	11	5
GO:0000794	condensed nuclear chromosome	cellular_component	0.15215	1	24	9339	159	76974	11	13
GO:0005262	calcium channel activity	molecular_function	0.16398	1	20	9339	133	76974	11	9
GO:0015085	calcium ion transmembrane transporter activity	molecular_function	0.18175	1	20	9339	135	76974	11	9
GO:0045892	negative regulation of transcription, DNA-templated	biological_process	0.22147	1	20	9339	136	76974	11	9
GO:0051253	negative regulation of RNA metabolic process	biological_process	0.22147	1	20	9339	136	76974	11	9
GO:1902679	negative regulation of RNA biosynthetic process	biological_process	0.22147	1	20	9339	136	76974	11	9
GO:1903507	negative regulation of nucleic acid-templated transcription	biological_process	0.22147	1	20	9339	136	76974	11	9
GO:0030133	transport vesicle	cellular_component	0.23025	1	38	9339	273	76974	11	27
GO:0051259	protein oligomerization	biological_process	0.32377	1	22	9339	162	76974	11	11
GO:0006888	ER to Golgi vesicle-mediated transport	biological_process	0.33054	1	34	9339	255	76974	11	23
GO:0031226	intrinsic component of plasma membrane	cellular_component	0.34529	1	24	9339	183	76974	11	13
GO:0016651	oxidoreductase activity, acting on NAD(P)H	molecular_function	0.37241	1	19	9339	147	76974	11	8
GO:0006873	cellular ion homeostasis	biological_process	0.45709	1	20	9339	164	76974	11	9
GO:0006875	cellular metal ion homeostasis	biological_process	0.45709	1	20	9339	164	76974	11	9
GO:0030003	cellular cation homeostasis	biological_process	0.45709	1	20	9339	164	76974	11	9
GO:0055082	cellular chemical homeostasis	biological_process	0.45709	1	20	9339	164	76974	11	9
GO:0000145	exocyst	cellular_component	0.52871	1	22	9339	177	76974	11	11
GO:0055065	metal ion homeostasis	biological_process	0.54758	1	20	9339	172	76974	11	9
GO:0050801	ion homeostasis	biological_process	0.55671	1	20	9339	173	76974	11	9
GO:0055080	cation homeostasis	biological_process	0.55671	1	20	9339	173	76974	11	9
GO:0098771	inorganic ion homeostasis	biological_process	0.55671	1	20	9339	173	76974	11	9
GO:0008643	carbohydrate transport	biological_process	0.6048	1	20	9339	177	76974	11	9
GO:0048878	chemical homeostasis	biological_process	0.61211	1	20	9339	178	76974	11	9
GO:0016796	exonuclease activity, active with either ribo- or deoxyribonucleic acids and producing 5'-phosphomonoesters	molecular_function	0.70079	1	24	9339	217	76974	11	13
GO:0016877	ligase activity, forming carbon-sulfur bonds	molecular_function	0.80667	1	16	9339	155	76974	11	5
GO:0008641	small protein activating enzyme activity	molecular_function	0.83071	1	15	9339	149	76974	11	4
GO:0019079	viral genome replication	biological_process	0.84908	1	23	9339	224	76974	11	12
GO:0009110	vitamin biosynthetic process	biological_process	0.87038	1	21	9339	214	76974	11	10
GO:0042364	water-soluble vitamin biosynthetic process	biological_process	0.87038	1	21	9339	214	76974	11	10
GO:0005984	disaccharide metabolic process	biological_process	0.87995	1	31	9339	303	76974	11	20
GO:0006766	vitamin metabolic process	biological_process	0.88513	1	21	9339	217	76974	11	10
GO:0006767	water-soluble vitamin metabolic process	biological_process	0.88513	1	21	9339	217	76974	11	10
GO:0006367	transcription initiation from RNA polymerase II promoter	biological_process	0.91622	1	22	9339	232	76974	11	11
GO:0015298	solute:cation antiporter activity	molecular_function	0.9422	1	16	9339	180	76974	11	5
GO:0015299	solute:proton antiporter activity	molecular_function	0.9422	1	16	9339	180	76974	11	5
GO:0008380	RNA splicing	biological_process	0.94262	1	24	9339	262	76974	11	13
GO:0031329	regulation of cellular catabolic process	biological_process	0.96049	1	29	9339	315	76974	11	18
GO:0018193	peptidyl-amino acid modification	biological_process	0.97528	1	25	9339	295	76974	11	14
GO:0019031	viral envelope	cellular_component	0.97703	1	33	9339	367	76974	11	22
GO:0036338	viral membrane	cellular_component	0.97703	1	33	9339	367	76974	11	22
GO:0006537	glutamate biosynthetic process	biological_process	0.00020063	0.010829	21	9339	76	76974	10	11
GO:0043650	dicarboxylic acid biosynthetic process	biological_process	0.00020063	0.010829	21	9339	76	76974	10	11
GO:0015930	glutamate synthase activity	molecular_function	0.00024584	0.012686	21	9339	77	76974	10	11
GO:0006536	glutamate metabolic process	biological_process	0.00071368	0.033127	21	9339	83	76974	10	11
GO:0044462	external encapsulating structure part	cellular_component	0.0054119	0.15688	11	9339	39	76974	10	1
GO:0030313	cell envelope	cellular_component	0.0066931	0.17523	11	9339	40	76974	10	1
GO:0004488	methylenetetrahydrofolate dehydrogenase (NADP+) activity	molecular_function	0.064119	0.78823	20	9339	115	76974	10	10
GO:0042597	periplasmic space	cellular_component	0.12088	1	15	9339	92	76974	10	5
GO:0009396	folic acid-containing compound biosynthetic process	biological_process	0.13914	1	21	9339	134	76974	10	11
GO:0006760	folic acid-containing compound metabolic process	biological_process	0.1519	1	23	9339	151	76974	10	13
GO:0042559	pteridine-containing compound biosynthetic process	biological_process	0.21619	1	21	9339	144	76974	10	11
GO:0042558	pteridine-containing compound metabolic process	biological_process	0.23551	1	23	9339	162	76974	10	13
GO:0016646	oxidoreductase activity, acting on the CH-NH group of donors, NAD or NADP as acceptor	molecular_function	0.24516	1	21	9339	146	76974	10	11
GO:0033180	proton-transporting V-type ATPase, V1 domain	cellular_component	0.24855	1	24	9339	172	76974	10	14
GO:0022900	electron transport chain	biological_process	0.25632	1	25	9339	183	76974	10	15
GO:0003743	translation initiation factor activity	molecular_function	0.26851	1	29	9339	215	76974	10	19
GO:0000221	vacuolar proton-transporting V-type ATPase, V1 domain	cellular_component	0.29144	1	21	9339	153	76974	10	11
GO:0016471	vacuolar proton-transporting V-type ATPase complex	cellular_component	0.29144	1	21	9339	153	76974	10	11
GO:0005774	vacuolar membrane	cellular_component	0.30225	1	21	9339	154	76974	10	11
GO:0044437	vacuolar part	cellular_component	0.30225	1	21	9339	154	76974	10	11
GO:0005773	vacuole	cellular_component	0.36837	1	21	9339	160	76974	10	11
GO:0006855	drug transmembrane transport	biological_process	0.37834	1	25	9339	189	76974	10	15
GO:0015238	drug transmembrane transporter activity	molecular_function	0.37834	1	25	9339	189	76974	10	15
GO:0015893	drug transport	biological_process	0.37834	1	25	9339	189	76974	10	15
GO:0090484	drug transporter activity	molecular_function	0.37834	1	25	9339	189	76974	10	15
GO:0042493	response to drug	biological_process	0.3997	1	25	9339	191	76974	10	15
GO:0015144	carbohydrate transmembrane transporter activity	molecular_function	0.44812	1	17	9339	138	76974	10	7
GO:1901476	carbohydrate transporter activity	molecular_function	0.44812	1	17	9339	138	76974	10	7
GO:0004521	endoribonuclease activity	molecular_function	0.65885	1	23	9339	203	76974	10	13
GO:0008219	cell death	biological_process	0.675	1	20	9339	178	76974	10	10
GO:0016265	death	biological_process	0.675	1	20	9339	178	76974	10	10
GO:0034655	nucleobase-containing compound catabolic process	biological_process	0.70627	1	21	9339	190	76974	10	11
GO:0005882	intermediate filament	cellular_component	0.72859	1	18	9339	164	76974	10	8
GO:0045111	intermediate filament cytoskeleton	cellular_component	0.72859	1	18	9339	164	76974	10	8
GO:0030659	cytoplasmic vesicle membrane	cellular_component	0.7356	1	35	9339	310	76974	10	25
GO:0012506	vesicle membrane	cellular_component	0.76121	1	35	9339	314	76974	10	25
GO:0044433	cytoplasmic vesicle part	cellular_component	0.76765	1	35	9339	315	76974	10	25
GO:0033177	proton-transporting two-sector ATPase complex, proton-transporting domain	cellular_component	0.84194	1	41	9339	393	76974	10	31
GO:0071103	DNA conformation change	biological_process	0.87445	1	25	9339	250	76974	10	15
GO:0016709	oxidoreductase activity, acting on paired donors, with incorporation or reduction of molecular oxygen, NAD(P)H as one donor, and incorporation of one atom of oxygen	molecular_function	0.88027	1	12	9339	129	76974	10	2
GO:0006814	sodium ion transport	biological_process	0.89819	1	17	9339	188	76974	10	7
GO:0010506	regulation of autophagy	biological_process	0.91229	1	25	9339	258	76974	10	15
GO:0008047	enzyme activator activity	molecular_function	0.93069	1	15	9339	168	76974	10	5
GO:0001775	cell activation	biological_process	0.94307	1	20	9339	222	76974	10	10
GO:0005615	extracellular space	cellular_component	0.95332	1	28	9339	303	76974	10	18
GO:0015629	actin cytoskeleton	cellular_component	0.972	1	20	9339	235	76974	10	10
GO:0008654	phospholipid biosynthetic process	biological_process	0.99958	1	19	9339	300	76974	10	9
GO:0009279	cell outer membrane	cellular_component	0.00073891	0.033365	9	9339	22	76974	9	0
GO:0004470	malic enzyme activity	molecular_function	0.015272	0.32951	14	9339	61	76974	9	5
GO:0004471	malate dehydrogenase (decarboxylating) (NAD+) activity	molecular_function	0.015272	0.32951	14	9339	61	76974	9	5
GO:0008374	O-acyltransferase activity	molecular_function	0.015788	0.32951	26	9339	139	76974	9	17
GO:0016703	oxidoreductase activity, acting on single donors with incorporation of molecular oxygen, incorporation of one atom of oxygen (internal monooxygenases or internal mixed function oxidases)	molecular_function	0.017116	0.35098	18	9339	88	76974	9	9
GO:0008661	1-deoxy-D-xylulose-5-phosphate synthase activity	molecular_function	0.029121	0.47484	12	9339	54	76974	9	3
GO:0016744	transferase activity, transferring aldehyde or ketonic groups	molecular_function	0.029121	0.47484	12	9339	54	76974	9	3
GO:0016615	malate dehydrogenase activity	molecular_function	0.029302	0.47613	14	9339	66	76974	9	5
GO:0016682	oxidoreductase activity, acting on diphenols and related substances as donors, oxygen as acceptor	molecular_function	0.052485	0.73283	10	9339	48	76974	9	1
GO:0042180	cellular ketone metabolic process	biological_process	0.077096	0.84036	12	9339	64	76974	9	3
GO:0003746	translation elongation factor activity	molecular_function	0.07842	0.84078	15	9339	86	76974	9	6
GO:0000502	proteasome complex	cellular_component	0.091661	0.92376	25	9339	162	76974	9	16
GO:0006414	translational elongation	biological_process	0.11364	1	15	9339	91	76974	9	6
GO:0043015	gamma-tubulin binding	molecular_function	0.11565	1	15	9339	87	76974	9	6
GO:0003995	acyl-CoA dehydrogenase activity	molecular_function	0.17131	1	14	9339	86	76974	9	5
GO:0005217	intracellular ligand-gated ion channel activity	molecular_function	0.20619	1	16	9339	108	76974	9	7
GO:0005218	intracellular ligand-gated calcium channel activity	molecular_function	0.20619	1	16	9339	108	76974	9	7
GO:0005219	ryanodine-sensitive calcium-release channel activity	molecular_function	0.20619	1	16	9339	108	76974	9	7
GO:0015278	calcium-release channel activity	molecular_function	0.20619	1	16	9339	108	76974	9	7
GO:0072350	tricarboxylic acid metabolic process	biological_process	0.22851	1	13	9339	84	76974	9	4
GO:0006099	tricarboxylic acid cycle	biological_process	0.26179	1	12	9339	79	76974	9	3
GO:0006101	citrate metabolic process	biological_process	0.26179	1	12	9339	79	76974	9	3
GO:0005777	peroxisome	cellular_component	0.26282	1	16	9339	114	76974	9	7
GO:0042579	microbody	cellular_component	0.26282	1	16	9339	114	76974	9	7
GO:0006338	chromatin remodeling	biological_process	0.27129	1	16	9339	114	76974	9	7
GO:0098542	defense response to other organism	biological_process	0.27906	1	19	9339	138	76974	9	10
GO:0012507	ER to Golgi transport vesicle membrane	cellular_component	0.32177	1	32	9339	237	76974	9	23
GO:0030127	COPII vesicle coat	cellular_component	0.32177	1	32	9339	237	76974	9	23
GO:0030134	ER to Golgi transport vesicle	cellular_component	0.32177	1	32	9339	237	76974	9	23
GO:0010181	FMN binding	molecular_function	0.32288	1	14	9339	101	76974	9	5
GO:0010256	endomembrane system organization	biological_process	0.33718	1	24	9339	180	76974	9	15
GO:0031514	motile cilium	cellular_component	0.40708	1	25	9339	192	76974	9	16
GO:0000746	conjugation	biological_process	0.40982	1	14	9339	106	76974	9	5
GO:0006874	cellular calcium ion homeostasis	biological_process	0.42526	1	17	9339	136	76974	9	8
GO:0055074	calcium ion homeostasis	biological_process	0.42526	1	17	9339	136	76974	9	8
GO:0072503	cellular divalent inorganic cation homeostasis	biological_process	0.42526	1	17	9339	136	76974	9	8
GO:0072507	divalent inorganic cation homeostasis	biological_process	0.42526	1	17	9339	136	76974	9	8
GO:0005929	cilium	cellular_component	0.43508	1	25	9339	195	76974	9	16
GO:0009628	response to abiotic stimulus	biological_process	0.45549	1	12	9339	93	76974	9	3
GO:0009060	aerobic respiration	biological_process	0.47547	1	12	9339	93	76974	9	3
GO:0006403	RNA localization	biological_process	0.47699	1	23	9339	191	76974	9	14
GO:0050657	nucleic acid transport	biological_process	0.47699	1	23	9339	191	76974	9	14
GO:0050658	RNA transport	biological_process	0.47699	1	23	9339	191	76974	9	14
GO:0051236	establishment of RNA localization	biological_process	0.47699	1	23	9339	191	76974	9	14
GO:0030658	transport vesicle membrane	cellular_component	0.48485	1	32	9339	255	76974	9	23
GO:0015931	nucleobase-containing compound transport	biological_process	0.56436	1	23	9339	199	76974	9	14
GO:0005887	integral component of plasma membrane	cellular_component	0.60765	1	20	9339	174	76974	9	11
GO:0005730	nucleolus	cellular_component	0.65425	1	13	9339	118	76974	9	4
GO:0022406	membrane docking	biological_process	0.66698	1	16	9339	142	76974	9	7
GO:0005991	trehalose metabolic process	biological_process	0.71279	1	21	9339	190	76974	9	12
GO:0006915	apoptotic process	biological_process	0.72058	1	19	9339	174	76974	9	10
GO:0012501	programmed cell death	biological_process	0.72058	1	19	9339	174	76974	9	10
GO:0010646	regulation of cell communication	biological_process	0.72271	1	18	9339	165	76974	9	9
GO:0023051	regulation of signaling	biological_process	0.74167	1	18	9339	167	76974	9	9
GO:0016891	endoribonuclease activity, producing 5'-phosphomonoesters	molecular_function	0.7436	1	16	9339	150	76974	9	7
GO:0030120	vesicle coat	cellular_component	0.75295	1	34	9339	304	76974	9	25
GO:0030135	coated vesicle	cellular_component	0.75295	1	34	9339	304	76974	9	25
GO:0030662	coated vesicle membrane	cellular_component	0.75295	1	34	9339	304	76974	9	25
GO:0010941	regulation of cell death	biological_process	0.76632	1	16	9339	152	76974	9	7
GO:0042981	regulation of apoptotic process	biological_process	0.76632	1	16	9339	152	76974	9	7
GO:0043067	regulation of programmed cell death	biological_process	0.76632	1	16	9339	152	76974	9	7
GO:0070838	divalent metal ion transport	biological_process	0.80693	1	16	9339	157	76974	9	7
GO:0070840	dynein complex binding	molecular_function	0.82197	1	27	9339	257	76974	9	18
GO:0050661	NADP binding	molecular_function	0.8321	1	16	9339	159	76974	9	7
GO:0005096	GTPase activator activity	molecular_function	0.84722	1	13	9339	133	76974	9	4
GO:0071804	cellular potassium ion transport	biological_process	0.84843	1	15	9339	152	76974	9	6
GO:0071805	potassium ion transmembrane transport	biological_process	0.84843	1	15	9339	152	76974	9	6
GO:0072511	divalent inorganic cation transport	biological_process	0.87021	1	17	9339	176	76974	9	8
GO:0061630	ubiquitin protein ligase activity	molecular_function	0.88706	1	17	9339	177	76974	9	8
GO:0061659	ubiquitin-like protein ligase activity	molecular_function	0.88706	1	17	9339	177	76974	9	8
GO:0000049	tRNA binding	molecular_function	0.90271	1	13	9339	144	76974	9	4
GO:0005577	fibrinogen complex	cellular_component	0.91534	1	18	9339	194	76974	9	9
GO:0030168	platelet activation	biological_process	0.91534	1	18	9339	194	76974	9	9
GO:0065004	protein-DNA complex assembly	biological_process	0.92124	1	23	9339	247	76974	9	14
GO:0071824	protein-DNA complex subunit organization	biological_process	0.92124	1	23	9339	247	76974	9	14
GO:1901136	carbohydrate derivative catabolic process	biological_process	0.92581	1	14	9339	160	76974	9	5
GO:0007596	blood coagulation	biological_process	0.93947	1	18	9339	201	76974	9	9
GO:0007599	hemostasis	biological_process	0.93947	1	18	9339	201	76974	9	9
GO:0050817	coagulation	biological_process	0.93947	1	18	9339	201	76974	9	9
GO:0050878	regulation of body fluid levels	biological_process	0.93947	1	18	9339	201	76974	9	9
GO:0019899	enzyme binding	molecular_function	0.94597	1	25	9339	268	76974	9	16
GO:0030674	protein binding, bridging	molecular_function	0.95068	1	19	9339	215	76974	9	10
GO:0060090	binding, bridging	molecular_function	0.95068	1	19	9339	215	76974	9	10
GO:0006313	transposition, DNA-mediated	biological_process	0.9509	1	19	9339	213	76974	9	10
GO:0032196	transposition	biological_process	0.9509	1	19	9339	213	76974	9	10
GO:0042060	wound healing	biological_process	0.9687	1	18	9339	214	76974	9	9
GO:0015079	potassium ion transmembrane transporter activity	molecular_function	0.96915	1	17	9339	204	76974	9	8
GO:0034061	DNA polymerase activity	molecular_function	0.97124	1	26	9339	293	76974	9	17
GO:0009611	response to wounding	biological_process	0.97393	1	18	9339	218	76974	9	9
GO:0015081	sodium ion transmembrane transporter activity	molecular_function	0.98007	1	13	9339	179	76974	9	4
GO:0051128	regulation of cellular component organization	biological_process	0.9912	1	20	9339	261	76974	9	11
GO:0043207	response to external biotic stimulus	biological_process	0.99125	1	25	9339	327	76974	9	16
GO:0051707	response to other organism	biological_process	0.99125	1	25	9339	327	76974	9	16
GO:0030244	cellulose biosynthetic process	biological_process	0.99316	1	23	9339	288	76974	9	14
GO:0030243	cellulose metabolic process	biological_process	0.99621	1	24	9339	309	76974	9	15
GO:0051274	beta-glucan biosynthetic process	biological_process	1	1	24	9339	427	76974	9	15
GO:0051273	beta-glucan metabolic process	biological_process	1	1	25	9339	448	76974	9	16
GO:0035251	UDP-glucosyltransferase activity	molecular_function	1	1	29	9339	536	76974	9	20
GO:0018580	nitronate monooxygenase activity	molecular_function	0.030061	0.48678	14	9339	68	76974	8	6
GO:0007127	meiosis I	biological_process	0.041795	0.61591	13	9339	64	76974	8	5
GO:0006739	NADP metabolic process	biological_process	0.046789	0.67193	14	9339	71	76974	8	6
GO:0004402	histone acetyltransferase activity	molecular_function	0.063191	0.7831	10	9339	48	76974	8	2
GO:0034212	peptide N-acetyltransferase activity	molecular_function	0.063191	0.7831	10	9339	48	76974	8	2
GO:0061733	peptide-lysine-N-acetyltransferase activity	molecular_function	0.063191	0.7831	10	9339	48	76974	8	2
GO:0007126	meiotic nuclear division	biological_process	0.070425	0.81457	13	9339	69	76974	8	5
GO:1903046	meiotic cell cycle process	biological_process	0.070425	0.81457	13	9339	69	76974	8	5
GO:0016811	hydrolase activity, acting on carbon-nitrogen (but not peptide) bonds, in linear amides	molecular_function	0.090222	0.92376	16	9339	94	76974	8	8
GO:0004520	endodeoxyribonuclease activity	molecular_function	0.090955	0.92376	14	9339	79	76974	8	6
GO:0051321	meiotic cell cycle	biological_process	0.096192	0.95838	16	9339	93	76974	8	8
GO:0009991	response to extracellular stimulus	biological_process	0.096736	0.95838	10	9339	55	76974	8	2
GO:0031668	cellular response to extracellular stimulus	biological_process	0.096736	0.95838	10	9339	55	76974	8	2
GO:0071496	cellular response to external stimulus	biological_process	0.096736	0.95838	10	9339	55	76974	8	2
GO:0016151	nickel cation binding	molecular_function	0.12038	1	22	9339	140	76974	8	14
GO:0032182	ubiquitin-like protein binding	molecular_function	0.13168	1	14	9339	84	76974	8	6
GO:0004843	ubiquitin-specific protease activity	molecular_function	0.13502	1	10	9339	56	76974	8	2
GO:0004764	shikimate 3-dehydrogenase (NADP+) activity	molecular_function	0.16118	1	11	9339	64	76974	8	3
GO:0003855	3-dehydroquinate dehydratase activity	molecular_function	0.18672	1	11	9339	66	76974	8	3
GO:0016667	oxidoreductase activity, acting on a sulfur group of donors	molecular_function	0.19868	1	28	9339	204	76974	8	20
GO:0006304	DNA modification	biological_process	0.27362	1	21	9339	160	76974	8	13
GO:0017119	Golgi transport complex	cellular_component	0.27902	1	15	9339	103	76974	8	7
GO:0004129	cytochrome-c oxidase activity	molecular_function	0.38719	1	13	9339	100	76974	8	5
GO:0016675	oxidoreductase activity, acting on a heme group of donors	molecular_function	0.38719	1	13	9339	100	76974	8	5
GO:0016676	oxidoreductase activity, acting on a heme group of donors, oxygen as acceptor	molecular_function	0.38719	1	13	9339	100	76974	8	5
GO:0015002	heme-copper terminal oxidase activity	molecular_function	0.41393	1	14	9339	110	76974	8	6
GO:0000790	nuclear chromatin	cellular_component	0.42396	1	10	9339	76	76974	8	2
GO:0008173	RNA methyltransferase activity	molecular_function	0.43294	1	25	9339	197	76974	8	17
GO:0004197	cysteine-type endopeptidase activity	molecular_function	0.45357	1	21	9339	168	76974	8	13
GO:0006904	vesicle docking involved in exocytosis	biological_process	0.47964	1	14	9339	109	76974	8	6
GO:0016886	ligase activity, forming phosphoric ester bonds	molecular_function	0.53857	1	13	9339	106	76974	8	5
GO:0016160	amylase activity	molecular_function	0.62693	1	12	9339	103	76974	8	4
GO:0048278	vesicle docking	biological_process	0.6553	1	14	9339	122	76974	8	6
GO:0000785	chromatin	cellular_component	0.65887	1	13	9339	118	76974	8	5
GO:0006402	mRNA catabolic process	biological_process	0.724	1	15	9339	139	76974	8	7
GO:0016881	acid-amino acid ligase activity	molecular_function	0.74137	1	10	9339	94	76974	8	2
GO:0006401	RNA catabolic process	biological_process	0.74445	1	15	9339	141	76974	8	7
GO:0009966	regulation of signal transduction	biological_process	0.78323	1	17	9339	163	76974	8	9
GO:0008375	acetylglucosaminyltransferase activity	molecular_function	0.84254	1	15	9339	151	76974	8	7
GO:0005672	transcription factor TFIIA complex	cellular_component	0.8563	1	14	9339	145	76974	8	6
GO:0008094	DNA-dependent ATPase activity	molecular_function	0.85925	1	12	9339	127	76974	8	4
GO:0015985	energy coupled proton transport, down electrochemical gradient	biological_process	0.86381	1	26	9339	263	76974	8	18
GO:0015986	ATP synthesis coupled proton transport	biological_process	0.86381	1	26	9339	263	76974	8	18
GO:0051382	kinetochore assembly	biological_process	0.87189	1	18	9339	186	76974	8	10
GO:0051383	kinetochore organization	biological_process	0.87189	1	18	9339	186	76974	8	10
GO:0034508	centromere complex assembly	biological_process	0.88964	1	19	9339	200	76974	8	11
GO:0006754	ATP biosynthetic process	biological_process	0.91384	1	26	9339	275	76974	8	18
GO:0016569	covalent chromatin modification	biological_process	0.92616	1	17	9339	189	76974	8	9
GO:0016570	histone modification	biological_process	0.92616	1	17	9339	189	76974	8	9
GO:0022411	cellular component disassembly	biological_process	0.93131	1	12	9339	142	76974	8	4
GO:0032984	macromolecular complex disassembly	biological_process	0.93131	1	12	9339	142	76974	8	4
GO:0009127	purine nucleoside monophosphate biosynthetic process	biological_process	0.93324	1	29	9339	310	76974	8	21
GO:0009168	purine ribonucleoside monophosphate biosynthetic process	biological_process	0.93324	1	29	9339	310	76974	8	21
GO:0009156	ribonucleoside monophosphate biosynthetic process	biological_process	0.94863	1	29	9339	317	76974	8	21
GO:0009124	nucleoside monophosphate biosynthetic process	biological_process	0.95071	1	29	9339	318	76974	8	21
GO:0009896	positive regulation of catabolic process	biological_process	0.95607	1	18	9339	207	76974	8	10
GO:0010508	positive regulation of autophagy	biological_process	0.95607	1	18	9339	207	76974	8	10
GO:0031331	positive regulation of cellular catabolic process	biological_process	0.95607	1	18	9339	207	76974	8	10
GO:0004803	transposase activity	molecular_function	0.96925	1	17	9339	202	76974	8	9
GO:0009142	nucleoside triphosphate biosynthetic process	biological_process	0.96979	1	26	9339	301	76974	8	18
GO:0009145	purine nucleoside triphosphate biosynthetic process	biological_process	0.96979	1	26	9339	301	76974	8	18
GO:0009201	ribonucleoside triphosphate biosynthetic process	biological_process	0.96979	1	26	9339	301	76974	8	18
GO:0009206	purine ribonucleoside triphosphate biosynthetic process	biological_process	0.96979	1	26	9339	301	76974	8	18
GO:0098800	inner mitochondrial membrane protein complex	cellular_component	0.97594	1	18	9339	228	76974	8	10
GO:0003682	chromatin binding	molecular_function	0.98613	1	15	9339	197	76974	8	7
GO:0016759	cellulose synthase activity	molecular_function	0.99844	1	19	9339	270	76974	8	11
GO:0016760	cellulose synthase (UDP-forming) activity	molecular_function	0.99844	1	19	9339	270	76974	8	11
GO:0003879	ATP phosphoribosyltransferase activity	molecular_function	1.77e-07	1.66e-05	11	9339	16	76974	7	4
GO:0051090	regulation of sequence-specific DNA binding transcription factor activity	biological_process	0.00173	0.06522	10	9339	29	76974	7	3
GO:0033202	DNA helicase complex	cellular_component	0.022601	0.41784	9	9339	35	76974	7	2
GO:0009523	photosystem II	cellular_component	0.11245	1	40	9339	290	76974	7	33
GO:0016888	endodeoxyribonuclease activity, producing 5'-phosphomonoesters	molecular_function	0.12734	1	10	9339	56	76974	7	3
GO:1901661	quinone metabolic process	biological_process	0.1309	1	9	9339	49	76974	7	2
GO:1901663	quinone biosynthetic process	biological_process	0.1309	1	9	9339	49	76974	7	2
GO:0042181	ketone biosynthetic process	biological_process	0.14389	1	9	9339	50	76974	7	2
GO:0015095	magnesium ion transmembrane transporter activity	molecular_function	0.19081	1	13	9339	81	76974	7	6
GO:0015693	magnesium ion transport	biological_process	0.19081	1	13	9339	81	76974	7	6
GO:0016872	intramolecular lyase activity	molecular_function	0.20098	1	15	9339	99	76974	7	8
GO:0051028	mRNA transport	biological_process	0.20402	1	16	9339	105	76974	7	9
GO:0016655	oxidoreductase activity, acting on NAD(P)H, quinone or similar compound as acceptor	molecular_function	0.28245	1	13	9339	93	76974	7	6
GO:0016814	hydrolase activity, acting on carbon-nitrogen (but not peptide) bonds, in cyclic amidines	molecular_function	0.35137	1	10	9339	71	76974	7	3
GO:0008276	protein methyltransferase activity	molecular_function	0.35882	1	18	9339	134	76974	7	11
GO:0022884	macromolecule transmembrane transporter activity	molecular_function	0.47907	1	13	9339	111	76974	7	6
GO:0030983	mismatched DNA binding	molecular_function	0.52619	1	12	9339	96	76974	7	5
GO:0019201	nucleotide kinase activity	molecular_function	0.54945	1	19	9339	156	76974	7	12
GO:0004970	ionotropic glutamate receptor activity	molecular_function	0.58406	1	13	9339	109	76974	7	6
GO:0008066	glutamate receptor activity	molecular_function	0.58406	1	13	9339	109	76974	7	6
GO:0046351	disaccharide biosynthetic process	biological_process	0.61265	1	18	9339	155	76974	7	11
GO:0006022	aminoglycan metabolic process	biological_process	0.64546	1	12	9339	108	76974	7	5
GO:0019354	siroheme biosynthetic process	biological_process	0.65755	1	16	9339	141	76974	7	9
GO:0043115	precorrin-2 dehydrogenase activity	molecular_function	0.65755	1	16	9339	141	76974	7	9
GO:0046156	siroheme metabolic process	biological_process	0.65755	1	16	9339	141	76974	7	9
GO:0005230	extracellular ligand-gated ion channel activity	molecular_function	0.66314	1	13	9339	115	76974	7	6
GO:0000940	condensed chromosome outer kinetochore	cellular_component	0.66498	1	17	9339	151	76974	7	10
GO:0006298	mismatch repair	biological_process	0.68007	1	12	9339	107	76974	7	5
GO:0006470	protein dephosphorylation	biological_process	0.70447	1	18	9339	163	76974	7	11
GO:0061025	membrane fusion	biological_process	0.74234	1	15	9339	141	76974	7	8
GO:0000777	condensed chromosome kinetochore	cellular_component	0.74588	1	17	9339	159	76974	7	10
GO:0000779	condensed chromosome, centromeric region	cellular_component	0.74588	1	17	9339	159	76974	7	10
GO:0045259	proton-transporting ATP synthase complex	cellular_component	0.75723	1	18	9339	175	76974	7	11
GO:0016311	dephosphorylation	biological_process	0.80036	1	18	9339	174	76974	7	11
GO:0006891	intra-Golgi vesicle-mediated transport	biological_process	0.81127	1	11	9339	111	76974	7	4
GO:0019205	nucleobase-containing compound kinase activity	molecular_function	0.83701	1	20	9339	198	76974	7	13
GO:0010628	positive regulation of gene expression	biological_process	0.84293	1	11	9339	117	76974	7	4
GO:0010604	positive regulation of macromolecule metabolic process	biological_process	0.85375	1	13	9339	137	76974	7	6
GO:0050790	regulation of catalytic activity	biological_process	0.89662	1	18	9339	193	76974	7	11
GO:0008170	N-methyltransferase activity	molecular_function	0.95933	1	19	9339	229	76974	7	12
GO:0006643	membrane lipid metabolic process	biological_process	0.98562	1	15	9339	204	76974	7	8
GO:0008026	ATP-dependent helicase activity	molecular_function	0.99721	1	7	9339	130	76974	7	0
GO:0070035	purine NTP-dependent helicase activity	molecular_function	0.99721	1	7	9339	130	76974	7	0
GO:0004930	G-protein coupled receptor activity	molecular_function	0.99847	1	11	9339	201	76974	7	4
GO:0051701	interaction with host	biological_process	0.99995	1	19	9339	340	76974	7	12
GO:0005618	cell wall	cellular_component	0.0051735	0.1509	36	9339	193	76974	6	30
GO:0004367	glycerol-3-phosphate dehydrogenase [NAD+] activity	molecular_function	0.0098666	0.24072	8	9339	26	76974	6	2
GO:0042262	DNA protection	biological_process	0.011907	0.27719	7	9339	22	76974	6	1
GO:0031072	heat shock protein binding	molecular_function	0.027932	0.46131	19	9339	100	76974	6	13
GO:0009307	DNA restriction-modification system	biological_process	0.027997	0.46131	11	9339	49	76974	6	5
GO:0044355	clearance of foreign intracellular DNA	biological_process	0.027997	0.46131	11	9339	49	76974	6	5
GO:0009916	alternative oxidase activity	molecular_function	0.030532	0.49266	6	9339	21	76974	6	0
GO:0015696	ammonium transport	biological_process	0.069193	0.81232	9	9339	43	76974	6	3
GO:0030955	potassium ion binding	molecular_function	0.084632	0.88554	16	9339	90	76974	6	10
GO:0031420	alkali metal ion binding	molecular_function	0.084632	0.88554	16	9339	90	76974	6	10
GO:0046685	response to arsenic-containing substance	biological_process	0.093318	0.93837	9	9339	45	76974	6	3
GO:0008519	ammonium transmembrane transporter activity	molecular_function	0.098119	0.968	9	9339	46	76974	6	3
GO:0000922	spindle pole	cellular_component	0.1251	1	15	9339	88	76974	6	9
GO:1990204	oxidoreductase complex	cellular_component	0.13012	1	31	9339	221	76974	6	25
GO:0008218	bioluminescence	biological_process	0.13942	1	6	9339	29	76974	6	0
GO:0022904	respiratory electron transport chain	biological_process	0.1556	1	14	9339	89	76974	6	8
GO:0008137	NADH dehydrogenase (ubiquinone) activity	molecular_function	0.16913	1	12	9339	76	76974	6	6
GO:0050136	NADH dehydrogenase (quinone) activity	molecular_function	0.16913	1	12	9339	76	76974	6	6
GO:0010035	response to inorganic substance	biological_process	0.20255	1	9	9339	56	76974	6	3
GO:0003954	NADH dehydrogenase activity	molecular_function	0.21641	1	12	9339	80	76974	6	6
GO:0016860	intramolecular oxidoreductase activity	molecular_function	0.22744	1	15	9339	102	76974	6	9
GO:0009584	detection of visible light	biological_process	0.26111	1	7	9339	42	76974	6	1
GO:0016042	lipid catabolic process	biological_process	0.26503	1	15	9339	102	76974	6	9
GO:0005852	eukaryotic translation initiation factor 3 complex	cellular_component	0.28123	1	15	9339	105	76974	6	9
GO:0018298	protein-chromophore linkage	biological_process	0.28133	1	7	9339	43	76974	6	1
GO:0009581	detection of external stimulus	biological_process	0.30192	1	7	9339	44	76974	6	1
GO:0009582	detection of abiotic stimulus	biological_process	0.30192	1	7	9339	44	76974	6	1
GO:0009583	detection of light stimulus	biological_process	0.30192	1	7	9339	44	76974	6	1
GO:0030915	Smc5-Smc6 complex	cellular_component	0.30657	1	8	9339	52	76974	6	2
GO:0051606	detection of stimulus	biological_process	0.3228	1	7	9339	45	76974	6	1
GO:0016307	phosphatidylinositol phosphate kinase activity	molecular_function	0.35828	1	9	9339	62	76974	6	3
GO:0051087	chaperone binding	molecular_function	0.40879	1	13	9339	99	76974	6	7
GO:0004866	endopeptidase inhibitor activity	molecular_function	0.42588	1	10	9339	79	76974	6	4
GO:0061135	endopeptidase regulator activity	molecular_function	0.42588	1	10	9339	79	76974	6	4
GO:0005839	proteasome core complex	cellular_component	0.43247	1	16	9339	129	76974	6	10
GO:0031109	microtubule polymerization or depolymerization	biological_process	0.4328	1	10	9339	74	76974	6	4
GO:0006081	cellular aldehyde metabolic process	biological_process	0.45828	1	10	9339	77	76974	6	4
GO:0043021	ribonucleoprotein complex binding	molecular_function	0.48329	1	10	9339	80	76974	6	4
GO:0008855	exodeoxyribonuclease VII activity	molecular_function	0.52406	1	14	9339	115	76974	6	8
GO:0007020	microtubule nucleation	biological_process	0.56685	1	8	9339	65	76974	6	2
GO:0046785	microtubule polymerization	biological_process	0.56685	1	8	9339	65	76974	6	2
GO:0004529	exodeoxyribonuclease activity	molecular_function	0.58833	1	14	9339	120	76974	6	8
GO:0016895	exodeoxyribonuclease activity, producing 5'-phosphomonoesters	molecular_function	0.58833	1	14	9339	120	76974	6	8
GO:0030414	peptidase inhibitor activity	molecular_function	0.60346	1	10	9339	90	76974	6	4
GO:0061134	peptidase regulator activity	molecular_function	0.60346	1	10	9339	90	76974	6	4
GO:0004140	dephospho-CoA kinase activity	molecular_function	0.62336	1	8	9339	70	76974	6	2
GO:0008138	protein tyrosine/serine/threonine phosphatase activity	molecular_function	0.62434	1	15	9339	129	76974	6	9
GO:0006368	transcription elongation from RNA polymerase II promoter	biological_process	0.63618	1	11	9339	97	76974	6	5
GO:0006839	mitochondrial transport	biological_process	0.66153	1	10	9339	91	76974	6	4
GO:0009314	response to radiation	biological_process	0.66726	1	8	9339	71	76974	6	2
GO:0004725	protein tyrosine phosphatase activity	molecular_function	0.66752	1	13	9339	116	76974	6	7
GO:0006354	DNA-templated transcription, elongation	biological_process	0.67764	1	11	9339	100	76974	6	5
GO:0004523	RNA-DNA hybrid ribonuclease activity	molecular_function	0.68171	1	7	9339	64	76974	6	1
GO:0005643	nuclear pore	cellular_component	0.69692	1	11	9339	99	76974	6	5
GO:0004506	squalene monooxygenase activity	molecular_function	0.69915	1	6	9339	56	76974	6	0
GO:0006040	amino sugar metabolic process	biological_process	0.70422	1	9	9339	86	76974	6	3
GO:0000956	nuclear-transcribed mRNA catabolic process	biological_process	0.75044	1	10	9339	97	76974	6	4
GO:0004721	phosphoprotein phosphatase activity	molecular_function	0.76121	1	17	9339	160	76974	6	11
GO:0009416	response to light stimulus	biological_process	0.76757	1	7	9339	69	76974	6	1
GO:0002376	immune system process	biological_process	0.82236	1	23	9339	223	76974	6	17
GO:0005635	nuclear envelope	cellular_component	0.84723	1	11	9339	114	76974	6	5
GO:0003968	RNA-directed RNA polymerase activity	molecular_function	0.86063	1	13	9339	136	76974	6	7
GO:0009891	positive regulation of biosynthetic process	biological_process	0.87536	1	10	9339	112	76974	6	4
GO:0010557	positive regulation of macromolecule biosynthetic process	biological_process	0.87536	1	10	9339	112	76974	6	4
GO:0031328	positive regulation of cellular biosynthetic process	biological_process	0.87536	1	10	9339	112	76974	6	4
GO:0051173	positive regulation of nitrogen compound metabolic process	biological_process	0.87536	1	10	9339	112	76974	6	4
GO:0043624	cellular protein complex disassembly	biological_process	0.88214	1	10	9339	113	76974	6	4
GO:1901615	organic hydroxy compound metabolic process	biological_process	0.88339	1	15	9339	160	76974	6	9
GO:0051130	positive regulation of cellular component organization	biological_process	0.89574	1	7	9339	87	76974	6	1
GO:0051726	regulation of cell cycle	biological_process	0.90661	1	18	9339	196	76974	6	12
GO:0016459	myosin complex	cellular_component	0.90939	1	14	9339	153	76974	6	8
GO:0000375	RNA splicing, via transesterification reactions	biological_process	0.91694	1	18	9339	197	76974	6	12
GO:0008677	2-dehydropantoate 2-reductase activity	molecular_function	0.93285	1	11	9339	130	76974	6	5
GO:0019013	viral nucleocapsid	cellular_component	0.939	1	7	9339	92	76974	6	1
GO:0000990	transcription factor activity, core RNA polymerase binding	molecular_function	0.94173	1	9	9339	113	76974	6	3
GO:0000996	core DNA-dependent RNA polymerase binding promoter specificity activity	molecular_function	0.94173	1	9	9339	113	76974	6	3
GO:0016987	sigma factor activity	molecular_function	0.94173	1	9	9339	113	76974	6	3
GO:0043241	protein complex disassembly	biological_process	0.9607	1	10	9339	131	76974	6	4
GO:0016866	intramolecular transferase activity	molecular_function	0.96505	1	17	9339	204	76974	6	11
GO:0018995	host	cellular_component	0.97409	1	11	9339	150	76974	6	5
GO:0033643	host cell part	cellular_component	0.97409	1	11	9339	150	76974	6	5
GO:0043657	host cell	cellular_component	0.97409	1	11	9339	150	76974	6	5
GO:0044215	other organism	cellular_component	0.97409	1	11	9339	150	76974	6	5
GO:0044216	other organism cell	cellular_component	0.97409	1	11	9339	150	76974	6	5
GO:0044217	other organism part	cellular_component	0.97409	1	11	9339	150	76974	6	5
GO:0033043	regulation of organelle organization	biological_process	0.98966	1	12	9339	172	76974	6	6
GO:0003887	DNA-directed DNA polymerase activity	molecular_function	0.99237	1	20	9339	259	76974	6	14
GO:1903509	liposaccharide metabolic process	biological_process	0.9964	1	13	9339	203	76974	6	7
GO:0005996	monosaccharide metabolic process	biological_process	0.99856	1	24	9339	330	76974	6	18
GO:0019318	hexose metabolic process	biological_process	0.99969	1	19	9339	299	76974	6	13
GO:0004826	phenylalanine-tRNA ligase activity	molecular_function	8.39e-05	0.0052548	8	9339	14	76974	5	3
GO:0006432	phenylalanyl-tRNA aminoacylation	biological_process	0.000114	0.0066917	9	9339	18	76974	5	4
GO:0015925	galactosidase activity	molecular_function	0.0016048	0.061772	28	9339	128	76974	5	23
GO:0030599	pectinesterase activity	molecular_function	0.0021156	0.075839	23	9339	100	76974	5	18
GO:0042545	cell wall modification	biological_process	0.0021156	0.075839	23	9339	100	76974	5	18
GO:0009341	beta-galactosidase complex	cellular_component	0.019742	0.37736	19	9339	94	76974	5	14
GO:0007129	synapsis	biological_process	0.019768	0.37736	7	9339	24	76974	5	2
GO:0007130	synaptonemal complex assembly	biological_process	0.019768	0.37736	7	9339	24	76974	5	2
GO:0045143	homologous chromosome segregation	biological_process	0.019768	0.37736	7	9339	24	76974	5	2
GO:0070192	chromosome organization involved in meiosis	biological_process	0.019768	0.37736	7	9339	24	76974	5	2
GO:0070193	synaptonemal complex organization	biological_process	0.019768	0.37736	7	9339	24	76974	5	2
GO:0030155	regulation of cell adhesion	biological_process	0.033576	0.5363	10	9339	44	76974	5	5
GO:0004565	beta-galactosidase activity	molecular_function	0.03438	0.54728	19	9339	100	76974	5	14
GO:0042651	thylakoid membrane	cellular_component	0.039941	0.6031	29	9339	182	76974	5	24
GO:0045132	meiotic chromosome segregation	biological_process	0.053317	0.73857	7	9339	29	76974	5	2
GO:0004576	oligosaccharyl transferase activity	molecular_function	0.054964	0.75032	13	9339	67	76974	5	8
GO:0031011	Ino80 complex	cellular_component	0.058753	0.77284	7	9339	29	76974	5	2
GO:0097346	INO80-type complex	cellular_component	0.058753	0.77284	7	9339	29	76974	5	2
GO:0004743	pyruvate kinase activity	molecular_function	0.066186	0.79749	13	9339	67	76974	5	8
GO:0006098	pentose-phosphate shunt	biological_process	0.070157	0.81457	9	9339	43	76974	5	4
GO:0051156	glucose 6-phosphate metabolic process	biological_process	0.070157	0.81457	9	9339	43	76974	5	4
GO:0045735	nutrient reservoir activity	molecular_function	0.079351	0.84882	15	9339	90	76974	5	10
GO:0019682	glyceraldehyde-3-phosphate metabolic process	biological_process	0.098585	0.97055	9	9339	46	76974	5	4
GO:0019359	nicotinamide nucleotide biosynthetic process	biological_process	0.1049	1	7	9339	33	76974	5	2
GO:0030151	molybdenum ion binding	molecular_function	0.11156	1	11	9339	60	76974	5	6
GO:0019363	pyridine nucleotide biosynthetic process	biological_process	0.11863	1	7	9339	34	76974	5	2
GO:0007131	reciprocal meiotic recombination	biological_process	0.13205	1	8	9339	42	76974	5	3
GO:0035825	reciprocal DNA recombination	biological_process	0.13205	1	8	9339	42	76974	5	3
GO:0009036	Type II site-specific deoxyribonuclease activity	molecular_function	0.14949	1	8	9339	44	76974	5	3
GO:0015666	restriction endodeoxyribonuclease activity	molecular_function	0.14949	1	8	9339	44	76974	5	3
GO:0003972	RNA ligase (ATP) activity	molecular_function	0.16818	1	6	9339	31	76974	5	1
GO:0019238	cyclohydrolase activity	molecular_function	0.16914	1	7	9339	38	76974	5	2
GO:0070603	SWI/SNF superfamily-type complex	cellular_component	0.17926	1	7	9339	39	76974	5	2
GO:0006743	ubiquinone metabolic process	biological_process	0.18228	1	7	9339	39	76974	5	2
GO:0006744	ubiquinone biosynthetic process	biological_process	0.18228	1	7	9339	39	76974	5	2
GO:0005874	microtubule	cellular_component	0.19549	1	12	9339	75	76974	5	7
GO:0005876	spindle microtubule	cellular_component	0.19549	1	12	9339	75	76974	5	7
GO:0008452	RNA ligase activity	molecular_function	0.20347	1	6	9339	33	76974	5	1
GO:0016742	hydroxymethyl-, formyl- and related transferase activity	molecular_function	0.22429	1	7	9339	41	76974	5	2
GO:0003993	acid phosphatase activity	molecular_function	0.23407	1	16	9339	106	76974	5	11
GO:0007030	Golgi organization	biological_process	0.26478	1	15	9339	102	76974	5	10
GO:0051052	regulation of DNA metabolic process	biological_process	0.28371	1	7	9339	44	76974	5	2
GO:0004298	threonine-type endopeptidase activity	molecular_function	0.38141	1	13	9339	101	76974	5	8
GO:0070003	threonine-type peptidase activity	molecular_function	0.38141	1	13	9339	101	76974	5	8
GO:0046912	transferase activity, transferring acyl groups, acyl groups converted into alkyl on transfer	molecular_function	0.38787	1	9	9339	65	76974	5	4
GO:0016226	iron-sulfur cluster assembly	biological_process	0.38852	1	10	9339	75	76974	5	5
GO:0031163	metallo-sulfur cluster assembly	biological_process	0.38852	1	10	9339	75	76974	5	5
GO:0004176	ATP-dependent peptidase activity	molecular_function	0.41739	1	6	9339	42	76974	5	1
GO:0000394	RNA splicing, via endonucleolytic cleavage and ligation	biological_process	0.41778	1	6	9339	43	76974	5	1
GO:0006388	tRNA splicing, via endonucleolytic cleavage and ligation	biological_process	0.41778	1	6	9339	43	76974	5	1
GO:0008608	attachment of spindle microtubules to kinetochore	biological_process	0.43369	1	13	9339	100	76974	5	8
GO:0006541	glutamine metabolic process	biological_process	0.44759	1	13	9339	100	76974	5	8
GO:0006413	translational initiation	biological_process	0.45325	1	18	9339	144	76974	5	13
GO:0072525	pyridine-containing compound biosynthetic process	biological_process	0.45771	1	7	9339	52	76974	5	2
GO:0044036	cell wall macromolecule metabolic process	biological_process	0.46782	1	8	9339	63	76974	5	3
GO:0019843	rRNA binding	molecular_function	0.46831	1	8	9339	65	76974	5	3
GO:0034453	microtubule anchoring	biological_process	0.50551	1	13	9339	105	76974	5	8
GO:0004535	poly(A)-specific ribonuclease activity	molecular_function	0.52831	1	10	9339	82	76974	5	5
GO:0000723	telomere maintenance	biological_process	0.53811	1	10	9339	80	76974	5	5
GO:0032200	telomere organization	biological_process	0.53811	1	10	9339	80	76974	5	5
GO:0060249	anatomical structure homeostasis	biological_process	0.53811	1	10	9339	80	76974	5	5
GO:0048284	organelle fusion	biological_process	0.59701	1	10	9339	86	76974	5	5
GO:0043248	proteasome assembly	biological_process	0.59741	1	10	9339	85	76974	5	5
GO:0000778	condensed nuclear chromosome kinetochore	cellular_component	0.62748	1	14	9339	122	76974	5	9
GO:0000780	condensed nuclear chromosome, centromeric region	cellular_component	0.62748	1	14	9339	122	76974	5	9
GO:0000942	condensed nuclear chromosome outer kinetochore	cellular_component	0.62748	1	14	9339	122	76974	5	9
GO:0042729	DASH complex	cellular_component	0.62748	1	14	9339	122	76974	5	9
GO:0044801	single-organism membrane fusion	biological_process	0.6421	1	10	9339	89	76974	5	5
GO:0005992	trehalose biosynthetic process	biological_process	0.65724	1	16	9339	142	76974	5	11
GO:0008061	chitin binding	molecular_function	0.6595	1	5	9339	47	76974	5	0
GO:0006323	DNA packaging	biological_process	0.70382	1	17	9339	155	76974	5	12
GO:0051336	regulation of hydrolase activity	biological_process	0.72768	1	8	9339	78	76974	5	3
GO:0000175	3'-5'-exoribonuclease activity	molecular_function	0.7465	1	10	9339	97	76974	5	5
GO:0004532	exoribonuclease activity	molecular_function	0.7465	1	10	9339	97	76974	5	5
GO:0016896	exoribonuclease activity, producing 5'-phosphomonoesters	molecular_function	0.7465	1	10	9339	97	76974	5	5
GO:0018205	peptidyl-lysine modification	biological_process	0.76159	1	12	9339	114	76974	5	7
GO:0009072	aromatic amino acid family metabolic process	biological_process	0.77156	1	17	9339	161	76974	5	12
GO:0016161	beta-amylase activity	molecular_function	0.79773	1	8	9339	81	76974	5	3
GO:0045263	proton-transporting ATP synthase complex, coupling factor F(o)	cellular_component	0.80273	1	14	9339	144	76974	5	9
GO:0006066	alcohol metabolic process	biological_process	0.81082	1	13	9339	131	76974	5	8
GO:0006415	translational termination	biological_process	0.81249	1	8	9339	85	76974	5	3
GO:0030154	cell differentiation	biological_process	0.81353	1	14	9339	144	76974	5	9
GO:0048731	system development	biological_process	0.82863	1	8	9339	88	76974	5	3
GO:0032879	regulation of localization	biological_process	0.85402	1	10	9339	110	76974	5	5
GO:0000276	mitochondrial proton-transporting ATP synthase complex, coupling factor F(o)	cellular_component	0.86985	1	8	9339	94	76974	5	3
GO:0000921	septin ring assembly	biological_process	0.88391	1	6	9339	72	76974	5	1
GO:0005940	septin ring	cellular_component	0.88391	1	6	9339	72	76974	5	1
GO:0031106	septin ring organization	biological_process	0.88391	1	6	9339	72	76974	5	1
GO:0032156	septin cytoskeleton	cellular_component	0.88391	1	6	9339	72	76974	5	1
GO:0032185	septin cytoskeleton organization	biological_process	0.88391	1	6	9339	72	76974	5	1
GO:0008948	oxaloacetate decarboxylase activity	molecular_function	0.89962	1	8	9339	101	76974	5	3
GO:0035725	sodium ion transmembrane transport	biological_process	0.89962	1	8	9339	101	76974	5	3
GO:0071436	sodium ion export	biological_process	0.89962	1	8	9339	101	76974	5	3
GO:0033646	host intracellular part	cellular_component	0.90023	1	9	9339	106	76974	5	4
GO:0043656	intracellular region of host	cellular_component	0.90023	1	9	9339	106	76974	5	4
GO:0006265	DNA topological change	biological_process	0.90708	1	8	9339	95	76974	5	3
GO:0008443	phosphofructokinase activity	molecular_function	0.90933	1	11	9339	126	76974	5	6
GO:0000272	polysaccharide catabolic process	biological_process	0.91206	1	12	9339	137	76974	5	7
GO:0060590	ATPase regulator activity	molecular_function	0.91354	1	11	9339	132	76974	5	6
GO:0019200	carbohydrate kinase activity	molecular_function	0.92297	1	11	9339	129	76974	5	6
GO:0005753	mitochondrial proton-transporting ATP synthase complex	cellular_component	0.92828	1	9	9339	114	76974	5	4
GO:0007067	mitotic nuclear division	biological_process	0.93437	1	12	9339	142	76974	5	7
GO:0045017	glycerolipid biosynthetic process	biological_process	0.93614	1	17	9339	196	76974	5	12
GO:0006777	Mo-molybdopterin cofactor biosynthetic process	biological_process	0.96399	1	6	9339	87	76974	5	1
GO:0019720	Mo-molybdopterin cofactor metabolic process	biological_process	0.96399	1	6	9339	87	76974	5	1
GO:0000278	mitotic cell cycle	biological_process	0.96714	1	13	9339	164	76974	5	8
GO:1903047	mitotic cell cycle process	biological_process	0.96714	1	13	9339	164	76974	5	8
GO:0003916	DNA topoisomerase activity	molecular_function	0.98146	1	8	9339	118	76974	5	3
GO:0006497	protein lipidation	biological_process	0.99061	1	9	9339	145	76974	5	4
GO:0006505	GPI anchor metabolic process	biological_process	0.99061	1	9	9339	145	76974	5	4
GO:0006506	GPI anchor biosynthetic process	biological_process	0.99061	1	9	9339	145	76974	5	4
GO:0006661	phosphatidylinositol biosynthetic process	biological_process	0.99061	1	9	9339	145	76974	5	4
GO:0046434	organophosphate catabolic process	biological_process	0.99239	1	8	9339	130	76974	5	3
GO:0042158	lipoprotein biosynthetic process	biological_process	0.99251	1	9	9339	148	76974	5	4
GO:0032324	molybdopterin cofactor biosynthetic process	biological_process	0.99523	1	6	9339	111	76974	5	1
GO:0043545	molybdopterin cofactor metabolic process	biological_process	0.99523	1	6	9339	111	76974	5	1
GO:0051189	prosthetic group metabolic process	biological_process	0.99523	1	6	9339	111	76974	5	1
GO:0031300	intrinsic component of organelle membrane	cellular_component	0.9955	1	17	9339	245	76974	5	12
GO:0031301	integral component of organelle membrane	cellular_component	0.9955	1	17	9339	245	76974	5	12
GO:0046474	glycerophospholipid biosynthetic process	biological_process	0.99781	1	10	9339	175	76974	5	5
GO:0006664	glycolipid metabolic process	biological_process	0.99824	1	11	9339	190	76974	5	6
GO:0009247	glycolipid biosynthetic process	biological_process	0.99824	1	11	9339	190	76974	5	6
GO:0046467	membrane lipid biosynthetic process	biological_process	0.99824	1	11	9339	190	76974	5	6
GO:0098797	plasma membrane protein complex	cellular_component	0.99854	1	16	9339	254	76974	5	11
GO:0004325	ferrochelatase activity	molecular_function	0.017849	0.35989	6	9339	18	76974	4	2
GO:0009654	photosystem II oxygen evolving complex	cellular_component	0.024927	0.44047	26	9339	154	76974	4	22
GO:0071203	WASH complex	cellular_component	0.02495	0.44047	9	9339	36	76974	4	5
GO:0004568	chitinase activity	molecular_function	0.049236	0.70278	6	9339	24	76974	4	2
GO:0045995	regulation of embryonic development	biological_process	0.052474	0.73283	8	9339	35	76974	4	4
GO:0009522	photosystem I	cellular_component	0.052894	0.73488	16	9339	91	76974	4	12
GO:0015939	pantothenate metabolic process	biological_process	0.058088	0.77028	5	9339	18	76974	4	1
GO:0015940	pantothenate biosynthetic process	biological_process	0.058088	0.77028	5	9339	18	76974	4	1
GO:0030058	amine dehydrogenase activity	molecular_function	0.059573	0.77337	5	9339	18	76974	4	1
GO:0004733	pyridoxamine-phosphate oxidase activity	molecular_function	0.05991	0.77337	6	9339	25	76974	4	2
GO:0016477	cell migration	biological_process	0.068336	0.81065	8	9339	37	76974	4	4
GO:0030334	regulation of cell migration	biological_process	0.068336	0.81065	8	9339	37	76974	4	4
GO:0015035	protein disulfide oxidoreductase activity	molecular_function	0.087648	0.90659	21	9339	134	76974	4	17
GO:0015036	disulfide oxidoreductase activity	molecular_function	0.087648	0.90659	21	9339	134	76974	4	17
GO:0051270	regulation of cellular component movement	biological_process	0.08892	0.91372	8	9339	39	76974	4	4
GO:2000145	regulation of cell motility	biological_process	0.08892	0.91372	8	9339	39	76974	4	4
GO:0006032	chitin catabolic process	biological_process	0.094539	0.94459	6	9339	28	76974	4	2
GO:0046348	amino sugar catabolic process	biological_process	0.094539	0.94459	6	9339	28	76974	4	2
GO:1901072	glucosamine-containing compound catabolic process	biological_process	0.094539	0.94459	6	9339	28	76974	4	2
GO:0002682	regulation of immune system process	biological_process	0.10126	0.98428	11	9339	61	76974	4	7
GO:0009790	embryo development	biological_process	0.11282	1	8	9339	41	76974	4	4
GO:0040012	regulation of locomotion	biological_process	0.13959	1	8	9339	43	76974	4	4
GO:0044769	ATPase activity, coupled to transmembrane movement of ions, rotational mechanism	molecular_function	0.14188	1	9	9339	51	76974	4	5
GO:0015159	polysaccharide transmembrane transporter activity	molecular_function	0.14662	1	5	9339	25	76974	4	1
GO:0004356	glutamate-ammonia ligase activity	molecular_function	0.1487	1	10	9339	57	76974	4	6
GO:0016998	cell wall macromolecule catabolic process	biological_process	0.15224	1	6	9339	32	76974	4	2
GO:0043130	ubiquitin binding	molecular_function	0.16143	1	8	9339	45	76974	4	4
GO:0016211	ammonia ligase activity	molecular_function	0.16152	1	10	9339	58	76974	4	6
GO:0016880	acid-ammonia (or amide) ligase activity	molecular_function	0.16152	1	10	9339	58	76974	4	6
GO:0015774	polysaccharide transport	biological_process	0.16489	1	5	9339	26	76974	4	1
GO:0033037	polysaccharide localization	biological_process	0.16489	1	5	9339	26	76974	4	1
GO:0051260	protein homooligomerization	biological_process	0.17963	1	7	9339	38	76974	4	3
GO:2000026	regulation of multicellular organismal development	biological_process	0.19387	1	8	9339	47	76974	4	4
GO:0007029	endoplasmic reticulum organization	biological_process	0.20494	1	9	9339	54	76974	4	5
GO:0080134	regulation of response to stress	biological_process	0.20529	1	10	9339	62	76974	4	6
GO:0006026	aminoglycan catabolic process	biological_process	0.22627	1	6	9339	36	76974	4	2
GO:0019829	cation-transporting ATPase activity	molecular_function	0.22787	1	9	9339	57	76974	4	5
GO:0042625	ATPase activity, coupled to transmembrane movement of ions	molecular_function	0.22787	1	9	9339	57	76974	4	5
GO:0003989	acetyl-CoA carboxylase activity	molecular_function	0.23303	1	8	9339	48	76974	4	4
GO:0016421	CoA carboxylase activity	molecular_function	0.23303	1	8	9339	48	76974	4	4
GO:0016885	ligase activity, forming carbon-carbon bonds	molecular_function	0.23303	1	8	9339	48	76974	4	4
GO:0051239	regulation of multicellular organismal process	biological_process	0.24007	1	9	9339	57	76974	4	5
GO:0005801	cis-Golgi network	cellular_component	0.25371	1	12	9339	79	76974	4	8
GO:0042775	mitochondrial ATP synthesis coupled electron transport	biological_process	0.27328	1	11	9339	76	76974	4	7
GO:0001101	response to acid chemical	biological_process	0.30327	1	5	9339	32	76974	4	1
GO:0004827	proline-tRNA ligase activity	molecular_function	0.30916	1	4	9339	23	76974	4	0
GO:0006433	prolyl-tRNA aminoacylation	biological_process	0.30916	1	4	9339	23	76974	4	0
GO:0006383	transcription from RNA polymerase III promoter	biological_process	0.33452	1	16	9339	121	76974	4	12
GO:0016929	SUMO-specific protease activity	molecular_function	0.34169	1	6	9339	39	76974	4	2
GO:0032183	SUMO binding	molecular_function	0.34169	1	6	9339	39	76974	4	2
GO:0070122	isopeptidase activity	molecular_function	0.34169	1	6	9339	39	76974	4	2
GO:0070138	ubiquitin-like protein-specific isopeptidase activity	molecular_function	0.34169	1	6	9339	39	76974	4	2
GO:0070140	SUMO-specific isopeptidase activity	molecular_function	0.34169	1	6	9339	39	76974	4	2
GO:0048584	positive regulation of response to stimulus	biological_process	0.34257	1	9	9339	63	76974	4	5
GO:0008483	transaminase activity	molecular_function	0.35963	1	9	9339	63	76974	4	5
GO:0016769	transferase activity, transferring nitrogenous groups	molecular_function	0.35963	1	9	9339	63	76974	4	5
GO:0009877	nodulation	biological_process	0.36404	1	9	9339	65	76974	4	5
GO:0009309	amine biosynthetic process	biological_process	0.36762	1	6	9339	40	76974	4	2
GO:0042401	cellular biogenic amine biosynthetic process	biological_process	0.36762	1	6	9339	40	76974	4	2
GO:0005669	transcription factor TFIID complex	cellular_component	0.37367	1	10	9339	73	76974	4	6
GO:0006119	oxidative phosphorylation	biological_process	0.38206	1	11	9339	83	76974	4	7
GO:0042773	ATP synthesis coupled electron transport	biological_process	0.38206	1	11	9339	83	76974	4	7
GO:0005234	extracellular-glutamate-gated ion channel activity	molecular_function	0.40511	1	10	9339	72	76974	4	6
GO:0016861	intramolecular oxidoreductase activity, interconverting aldoses and ketoses	molecular_function	0.42124	1	11	9339	84	76974	4	7
GO:0009617	response to bacterium	biological_process	0.44058	1	7	9339	54	76974	4	3
GO:0042742	defense response to bacterium	biological_process	0.44058	1	7	9339	54	76974	4	3
GO:0006595	polyamine metabolic process	biological_process	0.46005	1	5	9339	36	76974	4	1
GO:0006596	polyamine biosynthetic process	biological_process	0.46005	1	5	9339	36	76974	4	1
GO:0097164	ammonium ion metabolic process	biological_process	0.46005	1	5	9339	36	76974	4	1
GO:0015098	molybdate ion transmembrane transporter activity	molecular_function	0.46505	1	7	9339	52	76974	4	3
GO:0015689	molybdate ion transport	biological_process	0.46505	1	7	9339	52	76974	4	3
GO:0008312	7S RNA binding	molecular_function	0.47187	1	7	9339	55	76974	4	3
GO:0048500	signal recognition particle	cellular_component	0.47187	1	7	9339	55	76974	4	3
GO:0005231	excitatory extracellular ligand-gated ion channel activity	molecular_function	0.47438	1	10	9339	76	76974	4	6
GO:0015948	methanogenesis	biological_process	0.50978	1	16	9339	129	76974	4	12
GO:0015975	energy derivation by oxidation of reduced inorganic compounds	biological_process	0.50978	1	16	9339	129	76974	4	12
GO:0043447	alkane biosynthetic process	biological_process	0.50978	1	16	9339	129	76974	4	12
GO:0006030	chitin metabolic process	biological_process	0.51044	1	7	9339	57	76974	4	3
GO:1901071	glucosamine-containing compound metabolic process	biological_process	0.51044	1	7	9339	57	76974	4	3
GO:0005047	signal recognition particle binding	molecular_function	0.51436	1	7	9339	55	76974	4	3
GO:0009061	anaerobic respiration	biological_process	0.52096	1	16	9339	130	76974	4	12
GO:0015947	methane metabolic process	biological_process	0.5231	1	16	9339	130	76974	4	12
GO:0043446	cellular alkane metabolic process	biological_process	0.5231	1	16	9339	130	76974	4	12
GO:0004096	catalase activity	molecular_function	0.52497	1	6	9339	47	76974	4	2
GO:0008081	phosphoric diester hydrolase activity	molecular_function	0.52995	1	18	9339	146	76974	4	14
GO:0019900	kinase binding	molecular_function	0.53785	1	13	9339	107	76974	4	9
GO:1901700	response to oxygen-containing compound	biological_process	0.55192	1	6	9339	51	76974	4	2
GO:0016884	carbon-nitrogen ligase activity, with glutamine as amido-N-donor	molecular_function	0.57507	1	6	9339	49	76974	4	2
GO:1902531	regulation of intracellular signal transduction	biological_process	0.58631	1	9	9339	76	76974	4	5
GO:0004112	cyclic-nucleotide phosphodiesterase activity	molecular_function	0.59658	1	5	9339	42	76974	4	1
GO:0016765	transferase activity, transferring alkyl or aryl (other than methyl) groups	molecular_function	0.62	1	25	9339	213	76974	4	21
GO:0033179	proton-transporting V-type ATPase, V0 domain	cellular_component	0.63858	1	25	9339	216	76974	4	21
GO:0006955	immune response	biological_process	0.64565	1	16	9339	141	76974	4	12
GO:0006020	inositol metabolic process	biological_process	0.64766	1	7	9339	62	76974	4	3
GO:0005179	hormone activity	molecular_function	0.65084	1	11	9339	97	76974	4	7
GO:0005085	guanyl-nucleotide exchange factor activity	molecular_function	0.65423	1	9	9339	79	76974	4	5
GO:0003872	6-phosphofructokinase activity	molecular_function	0.67018	1	6	9339	54	76974	4	2
GO:1901677	phosphate transmembrane transporter activity	molecular_function	0.67625	1	8	9339	73	76974	4	4
GO:0000123	histone acetyltransferase complex	cellular_component	0.67881	1	7	9339	64	76974	4	3
GO:0031248	protein acetyltransferase complex	cellular_component	0.67881	1	7	9339	64	76974	4	3
GO:1902493	acetyltransferase complex	cellular_component	0.67881	1	7	9339	64	76974	4	3
GO:0050793	regulation of developmental process	biological_process	0.69093	1	8	9339	76	76974	4	4
GO:1902495	transmembrane transporter complex	cellular_component	0.70223	1	8	9339	78	76974	4	4
GO:1990351	transporter complex	cellular_component	0.70223	1	8	9339	78	76974	4	4
GO:0015932	nucleobase-containing compound transmembrane transporter activity	molecular_function	0.70562	1	14	9339	135	76974	4	10
GO:0006626	protein targeting to mitochondrion	biological_process	0.70728	1	8	9339	76	76974	4	4
GO:0034457	Mpp10 complex	cellular_component	0.71053	1	4	9339	39	76974	4	0
GO:0006790	sulfur compound metabolic process	biological_process	0.71708	1	19	9339	172	76974	4	15
GO:0004555	alpha,alpha-trehalase activity	molecular_function	0.72366	1	5	9339	48	76974	4	1
GO:0015927	trehalase activity	molecular_function	0.72366	1	5	9339	48	76974	4	1
GO:0030119	AP-type membrane coat adaptor complex	cellular_component	0.72782	1	12	9339	120	76974	4	8
GO:0004127	cytidylate kinase activity	molecular_function	0.73072	1	13	9339	120	76974	4	9
GO:0070585	protein localization to mitochondrion	biological_process	0.73436	1	8	9339	78	76974	4	4
GO:0072655	establishment of protein localization to mitochondrion	biological_process	0.73436	1	8	9339	78	76974	4	4
GO:0006476	protein deacetylation	biological_process	0.74759	1	5	9339	52	76974	4	1
GO:0035601	protein deacylation	biological_process	0.74759	1	5	9339	52	76974	4	1
GO:0098732	macromolecule deacylation	biological_process	0.74759	1	5	9339	52	76974	4	1
GO:0030686	90S preribosome	cellular_component	0.7635	1	4	9339	42	76974	4	0
GO:0035821	modification of morphology or physiology of other organism	biological_process	0.76395	1	10	9339	99	76974	4	6
GO:0005681	spliceosomal complex	cellular_component	0.76545	1	12	9339	118	76974	4	8
GO:0002097	tRNA wobble base modification	biological_process	0.76665	1	7	9339	70	76974	4	3
GO:0001510	RNA methylation	biological_process	0.77212	1	13	9339	126	76974	4	9
GO:0030182	neuron differentiation	biological_process	0.77626	1	5	9339	55	76974	4	1
GO:0048699	generation of neurons	biological_process	0.77626	1	5	9339	55	76974	4	1
GO:0005732	small nucleolar ribonucleoprotein complex	cellular_component	0.77736	1	4	9339	43	76974	4	0
GO:0051539	4 iron, 4 sulfur cluster binding	molecular_function	0.78065	1	7	9339	71	76974	4	3
GO:0005315	inorganic phosphate transmembrane transporter activity	molecular_function	0.78149	1	5	9339	53	76974	4	1
GO:0015743	malate transport	biological_process	0.7866	1	9	9339	92	76974	4	5
GO:0022008	neurogenesis	biological_process	0.79071	1	5	9339	56	76974	4	1
GO:0016832	aldehyde-lyase activity	molecular_function	0.79486	1	9	9339	93	76974	4	5
GO:0007399	nervous system development	biological_process	0.80432	1	5	9339	57	76974	4	1
GO:0005092	GDP-dissociation inhibitor activity	molecular_function	0.80503	1	6	9339	64	76974	4	2
GO:0015740	C4-dicarboxylate transport	biological_process	0.81406	1	11	9339	116	76974	4	7
GO:0019748	secondary metabolic process	biological_process	0.83162	1	8	9339	85	76974	4	4
GO:0031175	neuron projection development	biological_process	0.8411	1	4	9339	50	76974	4	0
GO:0048666	neuron development	biological_process	0.8411	1	4	9339	50	76974	4	0
GO:0016278	lysine N-methyltransferase activity	molecular_function	0.84189	1	11	9339	115	76974	4	7
GO:0016279	protein-lysine N-methyltransferase activity	molecular_function	0.84189	1	11	9339	115	76974	4	7
GO:0018024	histone-lysine N-methyltransferase activity	molecular_function	0.84189	1	11	9339	115	76974	4	7
GO:0042054	histone methyltransferase activity	molecular_function	0.84189	1	11	9339	115	76974	4	7
GO:0019751	polyol metabolic process	biological_process	0.8434	1	10	9339	105	76974	4	6
GO:0006817	phosphate ion transport	biological_process	0.84349	1	5	9339	58	76974	4	1
GO:0008378	galactosyltransferase activity	molecular_function	0.85095	1	8	9339	87	76974	4	4
GO:0019888	protein phosphatase regulator activity	molecular_function	0.85785	1	10	9339	107	76974	4	6
GO:1901617	organic hydroxy compound biosynthetic process	biological_process	0.86313	1	7	9339	79	76974	4	3
GO:0042025	host cell nucleus	cellular_component	0.86346	1	8	9339	91	76974	4	4
GO:0044452	nucleolar part	cellular_component	0.86596	1	4	9339	52	76974	4	0
GO:0044743	intracellular protein transmembrane import	biological_process	0.8694	1	7	9339	82	76974	4	3
GO:0006835	dicarboxylic acid transport	biological_process	0.88648	1	11	9339	126	76974	4	7
GO:0004499	N,N-dimethylaniline monooxygenase activity	molecular_function	0.88924	1	6	9339	72	76974	4	2
GO:0065002	intracellular protein transmembrane transport	biological_process	0.8978	1	7	9339	86	76974	4	3
GO:0010638	positive regulation of organelle organization	biological_process	0.90633	1	4	9339	54	76974	4	0
GO:0044282	small molecule catabolic process	biological_process	0.90729	1	15	9339	163	76974	4	11
GO:0033647	host intracellular organelle	cellular_component	0.91074	1	8	9339	98	76974	4	4
GO:0033648	host intracellular membrane-bounded organelle	cellular_component	0.91074	1	8	9339	98	76974	4	4
GO:0045893	positive regulation of transcription, DNA-templated	biological_process	0.91583	1	7	9339	87	76974	4	3
GO:1903508	positive regulation of nucleic acid-templated transcription	biological_process	0.91583	1	7	9339	87	76974	4	3
GO:0006771	riboflavin metabolic process	biological_process	0.91774	1	5	9339	67	76974	4	1
GO:0009231	riboflavin biosynthetic process	biological_process	0.91774	1	5	9339	67	76974	4	1
GO:0042726	flavin-containing compound metabolic process	biological_process	0.91774	1	5	9339	67	76974	4	1
GO:0042727	flavin-containing compound biosynthetic process	biological_process	0.91774	1	5	9339	67	76974	4	1
GO:0000377	RNA splicing, via transesterification reactions with bulged adenosine as nucleophile	biological_process	0.91903	1	14	9339	160	76974	4	10
GO:0000398	mRNA splicing, via spliceosome	biological_process	0.91903	1	14	9339	160	76974	4	10
GO:0008083	growth factor activity	molecular_function	0.91936	1	5	9339	67	76974	4	1
GO:0098799	outer mitochondrial membrane protein complex	cellular_component	0.92186	1	8	9339	99	76974	4	4
GO:0048468	cell development	biological_process	0.92255	1	6	9339	81	76974	4	2
GO:0042393	histone binding	molecular_function	0.92292	1	10	9339	117	76974	4	6
GO:0071806	protein transmembrane transport	biological_process	0.92641	1	7	9339	91	76974	4	3
GO:0019208	phosphatase regulator activity	molecular_function	0.94093	1	10	9339	122	76974	4	6
GO:0033218	amide binding	molecular_function	0.947	1	6	9339	85	76974	4	2
GO:0045935	positive regulation of nucleobase-containing compound metabolic process	biological_process	0.94774	1	7	9339	94	76974	4	3
GO:0051254	positive regulation of RNA metabolic process	biological_process	0.94774	1	7	9339	94	76974	4	3
GO:1902680	positive regulation of RNA biosynthetic process	biological_process	0.94774	1	7	9339	94	76974	4	3
GO:0006289	nucleotide-excision repair	biological_process	0.95097	1	7	9339	94	76974	4	3
GO:0004003	ATP-dependent DNA helicase activity	molecular_function	0.95759	1	4	9339	64	76974	4	0
GO:0006072	glycerol-3-phosphate metabolic process	biological_process	0.97019	1	7	9339	101	76974	4	3
GO:0046168	glycerol-3-phosphate catabolic process	biological_process	0.97019	1	7	9339	101	76974	4	3
GO:0000413	protein peptidyl-prolyl isomerization	biological_process	0.97153	1	9	9339	130	76974	4	5
GO:0003755	peptidyl-prolyl cis-trans isomerase activity	molecular_function	0.97153	1	9	9339	130	76974	4	5
GO:0016859	cis-trans isomerase activity	molecular_function	0.97153	1	9	9339	130	76974	4	5
GO:0018208	peptidyl-proline modification	biological_process	0.97153	1	9	9339	130	76974	4	5
GO:0016868	intramolecular transferase activity, phosphotransferases	molecular_function	0.97201	1	8	9339	114	76974	4	4
GO:0043161	proteasome-mediated ubiquitin-dependent protein catabolic process	biological_process	0.97291	1	9	9339	124	76974	4	5
GO:0010498	proteasomal protein catabolic process	biological_process	0.97653	1	9	9339	126	76974	4	5
GO:0009507	chloroplast	cellular_component	0.98017	1	6	9339	103	76974	4	2
GO:0009536	plastid	cellular_component	0.98017	1	6	9339	103	76974	4	2
GO:0030029	actin filament-based process	biological_process	0.9826	1	7	9339	109	76974	4	3
GO:0030036	actin cytoskeleton organization	biological_process	0.9826	1	7	9339	109	76974	4	3
GO:0030030	cell projection organization	biological_process	0.98981	1	6	9339	107	76974	4	2
GO:0052646	alditol phosphate metabolic process	biological_process	0.9937	1	8	9339	132	76974	4	4
GO:0000139	Golgi membrane	cellular_component	0.998	1	10	9339	170	76974	4	6
GO:0006006	glucose metabolic process	biological_process	0.99895	1	9	9339	165	76974	4	5
GO:0008649	rRNA methyltransferase activity	molecular_function	0.0017091	0.06522	11	9339	34	76974	3	8
GO:0008418	protein-N-terminal asparagine amidohydrolase activity	molecular_function	0.0025306	0.088027	6	9339	13	76974	3	3
GO:0009733	response to auxin	biological_process	0.0034926	0.11632	13	9339	53	76974	3	10
GO:0003880	protein C-terminal carboxyl O-methyltransferase activity	molecular_function	0.0043796	0.13442	7	9339	19	76974	3	4
GO:0004671	protein C-terminal S-isoprenylcysteine carboxyl O-methyltransferase activity	molecular_function	0.0043796	0.13442	7	9339	19	76974	3	4
GO:0006481	C-terminal protein methylation	biological_process	0.0043796	0.13442	7	9339	19	76974	3	4
GO:0010340	carboxyl-O-methyltransferase activity	molecular_function	0.0043796	0.13442	7	9339	19	76974	3	4
GO:0018410	C-terminal protein amino acid modification	biological_process	0.0043796	0.13442	7	9339	19	76974	3	4
GO:0043687	post-translational protein modification	biological_process	0.0043796	0.13442	7	9339	19	76974	3	4
GO:0051998	protein carboxyl O-methyltransferase activity	molecular_function	0.0043796	0.13442	7	9339	19	76974	3	4
GO:0017110	nucleoside-diphosphatase activity	molecular_function	0.005892	0.16276	4	9339	7	76974	3	1
GO:0009538	photosystem I reaction center	cellular_component	0.006105	0.16479	10	9339	38	76974	3	7
GO:0006359	regulation of transcription from RNA polymerase III promoter	biological_process	0.018917	0.37482	13	9339	59	76974	3	10
GO:0004864	protein phosphatase inhibitor activity	molecular_function	0.020924	0.39462	7	9339	24	76974	3	4
GO:0019212	phosphatase inhibitor activity	molecular_function	0.020924	0.39462	7	9339	24	76974	3	4
GO:0050776	regulation of immune response	biological_process	0.021779	0.40745	9	9339	36	76974	3	6
GO:0003689	DNA clamp loader activity	molecular_function	0.022973	0.41814	7	9339	24	76974	3	4
GO:0005657	replication fork	cellular_component	0.022973	0.41814	7	9339	24	76974	3	4
GO:0005663	DNA replication factor C complex	cellular_component	0.022973	0.41814	7	9339	24	76974	3	4
GO:0033170	protein-DNA loading ATPase activity	molecular_function	0.022973	0.41814	7	9339	24	76974	3	4
GO:0000279	M phase	biological_process	0.025402	0.44345	5	9339	15	76974	3	2
GO:0022403	cell cycle phase	biological_process	0.025402	0.44345	5	9339	15	76974	3	2
GO:0044848	biological phase	biological_process	0.025402	0.44345	5	9339	15	76974	3	2
GO:0004579	dolichyl-diphosphooligosaccharide-protein glycotransferase activity	molecular_function	0.038011	0.59292	8	9339	33	76974	3	5
GO:0004592	pantoate-beta-alanine ligase activity	molecular_function	0.038194	0.59292	4	9339	11	76974	3	1
GO:0016717	oxidoreductase activity, acting on paired donors, with oxidation of a pair of donors resulting in the reduction of molecular oxygen to two molecules of water	molecular_function	0.040376	0.60772	10	9339	45	76974	3	7
GO:0046429	4-hydroxy-3-methylbut-2-en-1-yl diphosphate synthase activity	molecular_function	0.051986	0.73092	8	9339	34	76974	3	5
GO:0052592	oxidoreductase activity, acting on CH or CH2 groups, with an iron-sulfur protein as acceptor	molecular_function	0.051986	0.73092	8	9339	34	76974	3	5
GO:0007128	meiotic prophase I	biological_process	0.060843	0.77337	4	9339	13	76974	3	1
GO:0051324	prophase	biological_process	0.060843	0.77337	4	9339	13	76974	3	1
GO:0098762	meiotic cell cycle phase	biological_process	0.060843	0.77337	4	9339	13	76974	3	1
GO:0098764	meiosis I cell cycle phase	biological_process	0.060843	0.77337	4	9339	13	76974	3	1
GO:0006542	glutamine biosynthetic process	biological_process	0.066122	0.79749	7	9339	30	76974	3	4
GO:0000795	synaptonemal complex	cellular_component	0.077972	0.84036	4	9339	14	76974	3	1
GO:0004421	hydroxymethylglutaryl-CoA synthase activity	molecular_function	0.097301	0.96194	4	9339	15	76974	3	1
GO:0001514	selenocysteine incorporation	biological_process	0.10012	0.9795	4	9339	15	76974	3	1
GO:0006451	translational readthrough	biological_process	0.10012	0.9795	4	9339	15	76974	3	1
GO:0034219	carbohydrate transmembrane transport	biological_process	0.10225	0.99	3	9339	10	76974	3	0
GO:0008097	5S rRNA binding	molecular_function	0.1199	1	4	9339	17	76974	3	1
GO:0007283	spermatogenesis	biological_process	0.12118	1	7	9339	35	76974	3	4
GO:0048232	male gamete generation	biological_process	0.12118	1	7	9339	35	76974	3	4
GO:0006282	regulation of DNA repair	biological_process	0.12578	1	5	9339	22	76974	3	2
GO:0080135	regulation of cellular response to stress	biological_process	0.12578	1	5	9339	22	76974	3	2
GO:2001020	regulation of response to DNA damage stimulus	biological_process	0.12578	1	5	9339	22	76974	3	2
GO:0008121	ubiquinol-cytochrome-c reductase activity	molecular_function	0.12826	1	11	9339	64	76974	3	8
GO:0016681	oxidoreductase activity, acting on diphenols and related substances as donors, cytochrome as acceptor	molecular_function	0.12826	1	11	9339	64	76974	3	8
GO:0017025	TBP-class protein binding	molecular_function	0.13421	1	8	9339	42	76974	3	5
GO:0048309	endoplasmic reticulum inheritance	biological_process	0.14454	1	7	9339	36	76974	3	4
GO:0009620	response to fungus	biological_process	0.16116	1	4	9339	19	76974	3	1
GO:0050832	defense response to fungus	biological_process	0.16116	1	4	9339	19	76974	3	1
GO:0004379	glycylpeptide N-tetradecanoyltransferase activity	molecular_function	0.1674	1	4	9339	18	76974	3	1
GO:0019107	myristoyltransferase activity	molecular_function	0.1674	1	4	9339	18	76974	3	1
GO:0004869	cysteine-type endopeptidase inhibitor activity	molecular_function	0.16895	1	6	9339	33	76974	3	3
GO:0048308	organelle inheritance	biological_process	0.17785	1	7	9339	38	76974	3	4
GO:0015718	monocarboxylic acid transport	biological_process	0.19321	1	5	9339	27	76974	3	2
GO:0050151	oleate hydratase activity	molecular_function	0.19575	1	6	9339	32	76974	3	3
GO:0003860	3-hydroxyisobutyryl-CoA hydrolase activity	molecular_function	0.19609	1	13	9339	83	76974	3	10
GO:0016289	CoA hydrolase activity	molecular_function	0.19609	1	13	9339	83	76974	3	10
GO:0009415	response to water	biological_process	0.20429	1	4	9339	21	76974	3	1
GO:0006480	N-terminal protein amino acid methylation	biological_process	0.22313	1	5	9339	28	76974	3	2
GO:0031365	N-terminal protein amino acid modification	biological_process	0.22313	1	5	9339	28	76974	3	2
GO:0003951	NAD+ kinase activity	molecular_function	0.23468	1	5	9339	27	76974	3	2
GO:0006741	NADP biosynthetic process	biological_process	0.23468	1	5	9339	27	76974	3	2
GO:0005086	ARF guanyl-nucleotide exchange factor activity	molecular_function	0.23604	1	5	9339	27	76974	3	2
GO:0032011	ARF protein signal transduction	biological_process	0.23604	1	5	9339	27	76974	3	2
GO:0032012	regulation of ARF protein signal transduction	biological_process	0.23604	1	5	9339	27	76974	3	2
GO:0004451	isocitrate lyase activity	molecular_function	0.26843	1	3	9339	15	76974	3	0
GO:0046915	transition metal ion transmembrane transporter activity	molecular_function	0.27141	1	15	9339	107	76974	3	12
GO:0004556	alpha-amylase activity	molecular_function	0.27892	1	4	9339	22	76974	3	1
GO:0048609	multicellular organismal reproductive process	biological_process	0.28001	1	10	9339	67	76974	3	7
GO:0004017	adenylate kinase activity	molecular_function	0.28272	1	6	9339	37	76974	3	3
GO:0007276	gamete generation	biological_process	0.28819	1	9	9339	60	76974	3	6
GO:0016833	oxo-acid-lyase activity	molecular_function	0.30416	1	3	9339	16	76974	3	0
GO:0016725	oxidoreductase activity, acting on CH or CH2 groups	molecular_function	0.30944	1	9	9339	60	76974	3	6
GO:0009317	acetyl-CoA carboxylase complex	cellular_component	0.32758	1	5	9339	31	76974	3	2
GO:0032504	multicellular organism reproduction	biological_process	0.32947	1	10	9339	70	76974	3	7
GO:0009967	positive regulation of signal transduction	biological_process	0.36163	1	8	9339	56	76974	3	5
GO:0010647	positive regulation of cell communication	biological_process	0.36163	1	8	9339	56	76974	3	5
GO:0023056	positive regulation of signaling	biological_process	0.36163	1	8	9339	56	76974	3	5
GO:0000041	transition metal ion transport	biological_process	0.36224	1	15	9339	115	76974	3	12
GO:0045116	protein neddylation	biological_process	0.37147	1	4	9339	25	76974	3	1
GO:0019773	proteasome core complex, alpha-subunit complex	cellular_component	0.37721	1	9	9339	67	76974	3	6
GO:0017176	phosphatidylinositol N-acetylglucosaminyltransferase activity	molecular_function	0.44638	1	5	9339	36	76974	3	2
GO:0008192	RNA guanylyltransferase activity	molecular_function	0.46146	1	5	9339	36	76974	3	2
GO:0070568	guanylyltransferase activity	molecular_function	0.46146	1	5	9339	36	76974	3	2
GO:0005337	nucleoside transmembrane transporter activity	molecular_function	0.47363	1	8	9339	62	76974	3	5
GO:0007031	peroxisome organization	biological_process	0.47845	1	8	9339	66	76974	3	5
GO:0044272	sulfur compound biosynthetic process	biological_process	0.47969	1	17	9339	134	76974	3	14
GO:0004066	asparagine synthase (glutamine-hydrolyzing) activity	molecular_function	0.52525	1	3	9339	22	76974	3	0
GO:0004097	catechol oxidase activity	molecular_function	0.55472	1	3	9339	24	76974	3	0
GO:0006528	asparagine metabolic process	biological_process	0.55635	1	3	9339	23	76974	3	0
GO:0006529	asparagine biosynthetic process	biological_process	0.55635	1	3	9339	23	76974	3	0
GO:0008053	mitochondrial fusion	biological_process	0.55645	1	8	9339	67	76974	3	5
GO:0009288	bacterial-type flagellum	cellular_component	0.56115	1	10	9339	84	76974	3	7
GO:0001503	ossification	biological_process	0.56626	1	3	9339	24	76974	3	0
GO:0006597	spermine biosynthetic process	biological_process	0.56778	1	4	9339	32	76974	3	1
GO:0008215	spermine metabolic process	biological_process	0.56778	1	4	9339	32	76974	3	1
GO:0009615	response to virus	biological_process	0.5801	1	11	9339	93	76974	3	8
GO:0044093	positive regulation of molecular function	biological_process	0.58362	1	3	9339	24	76974	3	0
GO:0004014	adenosylmethionine decarboxylase activity	molecular_function	0.59318	1	4	9339	33	76974	3	1
GO:0008216	spermidine metabolic process	biological_process	0.59318	1	4	9339	33	76974	3	1
GO:0008295	spermidine biosynthetic process	biological_process	0.59318	1	4	9339	33	76974	3	1
GO:0000289	nuclear-transcribed mRNA poly(A) tail shortening	biological_process	0.60697	1	5	9339	44	76974	3	2
GO:1901505	carbohydrate derivative transporter activity	molecular_function	0.61163	1	9	9339	79	76974	3	6
GO:0051119	sugar transmembrane transporter activity	molecular_function	0.61927	1	7	9339	61	76974	3	4
GO:0016755	transferase activity, transferring amino-acyl groups	molecular_function	0.61951	1	7	9339	61	76974	3	4
GO:0044702	single organism reproductive process	biological_process	0.63923	1	11	9339	98	76974	3	8
GO:0019953	sexual reproduction	biological_process	0.64462	1	12	9339	107	76974	3	9
GO:0008964	phosphoenolpyruvate carboxylase activity	molecular_function	0.645	1	5	9339	44	76974	3	2
GO:0004813	alanine-tRNA ligase activity	molecular_function	0.64926	1	8	9339	70	76974	3	5
GO:0006419	alanyl-tRNA aminoacylation	biological_process	0.64926	1	8	9339	70	76974	3	5
GO:0007034	vacuolar transport	biological_process	0.64945	1	8	9339	73	76974	3	5
GO:0007265	Ras protein signal transduction	biological_process	0.65048	1	5	9339	44	76974	3	2
GO:0046578	regulation of Ras protein signal transduction	biological_process	0.65048	1	5	9339	44	76974	3	2
GO:0051205	protein insertion into membrane	biological_process	0.66511	1	5	9339	46	76974	3	2
GO:0015977	carbon fixation	biological_process	0.66524	1	5	9339	45	76974	3	2
GO:0072527	pyrimidine-containing compound metabolic process	biological_process	0.66826	1	13	9339	118	76974	3	10
GO:0008023	transcription elongation factor complex	cellular_component	0.67746	1	6	9339	56	76974	3	3
GO:0032786	positive regulation of DNA-templated transcription, elongation	biological_process	0.67823	1	5	9339	46	76974	3	2
GO:0032968	positive regulation of transcription elongation from RNA polymerase II promoter	biological_process	0.67823	1	5	9339	46	76974	3	2
GO:0034243	regulation of transcription elongation from RNA polymerase II promoter	biological_process	0.67823	1	5	9339	46	76974	3	2
GO:0000774	adenyl-nucleotide exchange factor activity	molecular_function	0.67975	1	8	9339	74	76974	3	5
GO:0005451	monovalent cation:proton antiporter activity	molecular_function	0.68176	1	5	9339	46	76974	3	2
GO:0015491	cation:cation antiporter activity	molecular_function	0.68176	1	5	9339	46	76974	3	2
GO:0051056	regulation of small GTPase mediated signal transduction	biological_process	0.6863	1	5	9339	46	76974	3	2
GO:0000184	nuclear-transcribed mRNA catabolic process, nonsense-mediated decay	biological_process	0.68653	1	5	9339	46	76974	3	2
GO:0051607	defense response to virus	biological_process	0.68757	1	7	9339	65	76974	3	4
GO:0019904	protein domain specific binding	molecular_function	0.68958	1	3	9339	28	76974	3	0
GO:0009073	aromatic amino acid family biosynthetic process	biological_process	0.69406	1	12	9339	109	76974	3	9
GO:0071973	bacterial-type flagellum-dependent cell motility	biological_process	0.69735	1	7	9339	66	76974	3	4
GO:0002252	immune effector process	biological_process	0.70349	1	7	9339	66	76974	3	4
GO:0016458	gene silencing	biological_process	0.70682	1	8	9339	74	76974	3	5
GO:0031625	ubiquitin protein ligase binding	molecular_function	0.71177	1	6	9339	56	76974	3	3
GO:0044389	ubiquitin-like protein ligase binding	molecular_function	0.71177	1	6	9339	56	76974	3	3
GO:0009986	cell surface	cellular_component	0.71992	1	4	9339	39	76974	3	1
GO:0031399	regulation of protein modification process	biological_process	0.72425	1	12	9339	114	76974	3	9
GO:0019901	protein kinase binding	molecular_function	0.72574	1	11	9339	104	76974	3	8
GO:0015969	guanosine tetraphosphate metabolic process	biological_process	0.73147	1	4	9339	39	76974	3	1
GO:0034035	purine ribonucleoside bisphosphate metabolic process	biological_process	0.73147	1	4	9339	39	76974	3	1
GO:0032784	regulation of DNA-templated transcription, elongation	biological_process	0.73271	1	5	9339	49	76974	3	2
GO:0000288	nuclear-transcribed mRNA catabolic process, deadenylation-dependent decay	biological_process	0.73934	1	5	9339	51	76974	3	2
GO:0001539	cilium or flagellum-dependent cell motility	biological_process	0.74237	1	7	9339	69	76974	3	4
GO:0097588	archaeal or bacterial-type flagellum-dependent cell motility	biological_process	0.74237	1	7	9339	69	76974	3	4
GO:0045944	positive regulation of transcription from RNA polymerase II promoter	biological_process	0.74927	1	5	9339	50	76974	3	2
GO:0002098	tRNA wobble uridine modification	biological_process	0.75388	1	5	9339	50	76974	3	2
GO:0030203	glycosaminoglycan metabolic process	biological_process	0.75485	1	5	9339	51	76974	3	2
GO:0007409	axonogenesis	biological_process	0.78054	1	3	9339	36	76974	3	0
GO:0007411	axon guidance	biological_process	0.78054	1	3	9339	36	76974	3	0
GO:0048667	cell morphogenesis involved in neuron differentiation	biological_process	0.78054	1	3	9339	36	76974	3	0
GO:0048812	neuron projection morphogenesis	biological_process	0.78054	1	3	9339	36	76974	3	0
GO:0061564	axon development	biological_process	0.78054	1	3	9339	36	76974	3	0
GO:0097485	neuron projection guidance	biological_process	0.78054	1	3	9339	36	76974	3	0
GO:0005787	signal peptidase complex	cellular_component	0.79107	1	5	9339	54	76974	3	2
GO:0006465	signal peptide processing	biological_process	0.79107	1	5	9339	54	76974	3	2
GO:0004345	glucose-6-phosphate dehydrogenase activity	molecular_function	0.79692	1	4	9339	43	76974	3	1
GO:0070206	protein trimerization	biological_process	0.80192	1	8	9339	83	76974	3	5
GO:0016776	phosphotransferase activity, phosphate group as acceptor	molecular_function	0.80417	1	6	9339	66	76974	3	3
GO:0003909	DNA ligase activity	molecular_function	0.80707	1	7	9339	73	76974	3	4
GO:0004512	inositol-3-phosphate synthase activity	molecular_function	0.8088	1	5	9339	54	76974	3	2
GO:0006021	inositol biosynthetic process	biological_process	0.8088	1	5	9339	54	76974	3	2
GO:0046173	polyol biosynthetic process	biological_process	0.8088	1	5	9339	54	76974	3	2
GO:0000904	cell morphogenesis involved in differentiation	biological_process	0.81446	1	3	9339	38	76974	3	0
GO:0006935	chemotaxis	biological_process	0.81694	1	5	9339	58	76974	3	2
GO:0042330	taxis	biological_process	0.81694	1	5	9339	58	76974	3	2
GO:0043086	negative regulation of catalytic activity	biological_process	0.81863	1	9	9339	96	76974	3	6
GO:0044092	negative regulation of molecular function	biological_process	0.81863	1	9	9339	96	76974	3	6
GO:0009306	protein secretion	biological_process	0.83525	1	8	9339	89	76974	3	5
GO:0015294	solute:cation symporter activity	molecular_function	0.84023	1	8	9339	87	76974	3	5
GO:0046165	alcohol biosynthetic process	biological_process	0.84255	1	5	9339	57	76974	3	2
GO:0009847	spore germination	biological_process	0.84759	1	4	9339	48	76974	3	1
GO:0070009	serine-type aminopeptidase activity	molecular_function	0.84762	1	6	9339	67	76974	3	3
GO:0003910	DNA ligase (ATP) activity	molecular_function	0.8494	1	5	9339	57	76974	3	2
GO:0032990	cell part morphogenesis	biological_process	0.86264	1	3	9339	42	76974	3	0
GO:0048858	cell projection morphogenesis	biological_process	0.86264	1	3	9339	42	76974	3	0
GO:0007006	mitochondrial membrane organization	biological_process	0.86519	1	7	9339	79	76974	3	4
GO:0008239	dipeptidyl-peptidase activity	molecular_function	0.88366	1	6	9339	71	76974	3	3
GO:0016272	prefoldin complex	cellular_component	0.88713	1	6	9339	74	76974	3	3
GO:0052126	movement in host environment	biological_process	0.88721	1	5	9339	62	76974	3	2
GO:0052192	movement in environment of other organism involved in symbiotic interaction	biological_process	0.88721	1	5	9339	62	76974	3	2
GO:0015293	symporter activity	molecular_function	0.88832	1	8	9339	93	76974	3	5
GO:0044003	modification by symbiont of host morphology or physiology	biological_process	0.88849	1	8	9339	94	76974	3	5
GO:0051817	modification of morphology or physiology of other organism involved in symbiotic interaction	biological_process	0.88849	1	8	9339	94	76974	3	5
GO:0043244	regulation of protein complex disassembly	biological_process	0.88867	1	5	9339	64	76974	3	2
GO:0019239	deaminase activity	molecular_function	0.90241	1	5	9339	64	76974	3	2
GO:1990542	mitochondrial transmembrane transport	biological_process	0.91387	1	5	9339	66	76974	3	2
GO:0019048	modulation by virus of host morphology or physiology	biological_process	0.91426	1	7	9339	88	76974	3	4
GO:0003747	translation release factor activity	molecular_function	0.92352	1	5	9339	67	76974	3	2
GO:0008079	translation termination factor activity	molecular_function	0.92352	1	5	9339	67	76974	3	2
GO:0000118	histone deacetylase complex	cellular_component	0.92452	1	3	9339	47	76974	3	0
GO:0016575	histone deacetylation	biological_process	0.92452	1	3	9339	47	76974	3	0
GO:0070823	HDA1 complex	cellular_component	0.92452	1	3	9339	47	76974	3	0
GO:0090066	regulation of anatomical structure size	biological_process	0.9391	1	5	9339	71	76974	3	2
GO:0006302	double-strand break repair	biological_process	0.94486	1	5	9339	72	76974	3	2
GO:0016054	organic acid catabolic process	biological_process	0.95	1	12	9339	145	76974	3	9
GO:0046395	carboxylic acid catabolic process	biological_process	0.95	1	12	9339	145	76974	3	9
GO:0005742	mitochondrial outer membrane translocase complex	cellular_component	0.95717	1	6	9339	86	76974	3	3
GO:0008064	regulation of actin polymerization or depolymerization	biological_process	0.96423	1	4	9339	66	76974	3	1
GO:0008154	actin polymerization or depolymerization	biological_process	0.96423	1	4	9339	66	76974	3	1
GO:0030041	actin filament polymerization	biological_process	0.96423	1	4	9339	66	76974	3	1
GO:0030832	regulation of actin filament length	biological_process	0.96423	1	4	9339	66	76974	3	1
GO:0030833	regulation of actin filament polymerization	biological_process	0.96423	1	4	9339	66	76974	3	1
GO:0032271	regulation of protein polymerization	biological_process	0.96423	1	4	9339	66	76974	3	1
GO:0032535	regulation of cellular component size	biological_process	0.96423	1	4	9339	66	76974	3	1
GO:0032956	regulation of actin cytoskeleton organization	biological_process	0.96423	1	4	9339	66	76974	3	1
GO:0032970	regulation of actin filament-based process	biological_process	0.96423	1	4	9339	66	76974	3	1
GO:0043254	regulation of protein complex assembly	biological_process	0.96423	1	4	9339	66	76974	3	1
GO:0051493	regulation of cytoskeleton organization	biological_process	0.96624	1	6	9339	90	76974	3	3
GO:0003950	NAD+ ADP-ribosyltransferase activity	molecular_function	0.96936	1	4	9339	66	76974	3	1
GO:0051302	regulation of cell division	biological_process	0.97065	1	7	9339	102	76974	3	4
GO:0003684	damaged DNA binding	molecular_function	0.97447	1	5	9339	80	76974	3	2
GO:1901068	guanosine-containing compound metabolic process	biological_process	0.97556	1	4	9339	70	76974	3	1
GO:0007015	actin filament organization	biological_process	0.99106	1	4	9339	81	76974	3	1
GO:0044087	regulation of cellular component biogenesis	biological_process	0.99456	1	4	9339	86	76974	3	1
GO:0004611	phosphoenolpyruvate carboxykinase activity	molecular_function	0.99902	1	6	9339	128	76974	3	3
GO:0004420	hydroxymethylglutaryl-CoA reductase (NADPH) activity	molecular_function	0.0023141	0.081707	5	9339	9	76974	2	3
GO:0042126	nitrate metabolic process	biological_process	0.011314	0.26698	8	9339	27	76974	2	6
GO:0042128	nitrate assimilation	biological_process	0.011314	0.26698	8	9339	27	76974	2	6
GO:2001057	reactive nitrogen species metabolic process	biological_process	0.011314	0.26698	8	9339	27	76974	2	6
GO:0009439	cyanate metabolic process	biological_process	0.011924	0.27719	3	9339	5	76974	2	1
GO:0010024	phytochromobilin biosynthetic process	biological_process	0.013026	0.29409	5	9339	13	76974	2	3
GO:0016636	oxidoreductase activity, acting on the CH-CH group of donors, iron-sulfur protein as acceptor	molecular_function	0.013026	0.29409	5	9339	13	76974	2	3
GO:0051202	phytochromobilin metabolic process	biological_process	0.013026	0.29409	5	9339	13	76974	2	3
GO:0046658	anchored component of plasma membrane	cellular_component	0.015771	0.32951	4	9339	9	76974	2	2
GO:0000062	fatty-acyl-CoA binding	molecular_function	0.023141	0.41958	8	9339	31	76974	2	6
GO:0016298	lipase activity	molecular_function	0.023374	0.42217	14	9339	65	76974	2	12
GO:0050897	cobalt ion binding	molecular_function	0.025564	0.44387	5	9339	15	76974	2	3
GO:0009976	tocopherol cyclase activity	molecular_function	0.038984	0.59632	5	9339	16	76974	2	3
GO:0008283	cell proliferation	biological_process	0.039141	0.59677	5	9339	17	76974	2	3
GO:0008883	glutamyl-tRNA reductase activity	molecular_function	0.045017	0.65247	5	9339	17	76974	2	3
GO:0004806	triglyceride lipase activity	molecular_function	0.056253	0.75476	7	9339	29	76974	2	5
GO:0043189	H4/H2A histone acetyltransferase complex	cellular_component	0.05989	0.77337	3	9339	8	76974	2	1
GO:1902562	H4 histone acetyltransferase complex	cellular_component	0.05989	0.77337	3	9339	8	76974	2	1
GO:0008612	peptidyl-lysine modification to peptidyl-hypusine	biological_process	0.065786	0.79749	3	9339	8	76974	2	1
GO:0071941	nitrogen cycle metabolic process	biological_process	0.070919	0.8148	9	9339	44	76974	2	7
GO:0009555	pollen development	biological_process	0.07404	0.83665	3	9339	9	76974	2	1
GO:0048229	gametophyte development	biological_process	0.07404	0.83665	3	9339	9	76974	2	1
GO:0043547	positive regulation of GTPase activity	biological_process	0.078202	0.84036	2	9339	4	76974	2	0
GO:0006120	mitochondrial electron transport, NADH to ubiquinone	biological_process	0.080139	0.85531	7	9339	32	76974	2	5
GO:0009291	unidirectional conjugation	biological_process	0.08273	0.87884	3	9339	9	76974	2	1
GO:0046789	host cell surface receptor binding	molecular_function	0.085119	0.88827	5	9339	20	76974	2	3
GO:0006665	sphingolipid metabolic process	biological_process	0.086723	0.90099	4	9339	15	76974	2	2
GO:0006672	ceramide metabolic process	biological_process	0.086723	0.90099	4	9339	15	76974	2	2
GO:1902554	serine/threonine protein kinase complex	cellular_component	0.091489	0.92376	5	9339	20	76974	2	3
GO:1902911	protein kinase complex	cellular_component	0.091489	0.92376	5	9339	20	76974	2	3
GO:1990316	ATG1/UKL1 kinase complex	cellular_component	0.091489	0.92376	5	9339	20	76974	2	3
GO:0046812	host cell surface binding	molecular_function	0.10145	0.98428	5	9339	21	76974	2	3
GO:0005829	cytosol	cellular_component	0.10662	1	7	9339	34	76974	2	5
GO:0031082	BLOC complex	cellular_component	0.10662	1	7	9339	34	76974	2	5
GO:0031083	BLOC-1 complex	cellular_component	0.10662	1	7	9339	34	76974	2	5
GO:0044445	cytosolic part	cellular_component	0.10662	1	7	9339	34	76974	2	5
GO:0022624	proteasome accessory complex	cellular_component	0.11328	1	5	9339	22	76974	2	3
GO:0004635	phosphoribosyl-AMP cyclohydrolase activity	molecular_function	0.11534	1	4	9339	16	76974	2	2
GO:0003756	protein disulfide isomerase activity	molecular_function	0.11639	1	3	9339	10	76974	2	1
GO:0016864	intramolecular oxidoreductase activity, transposing S-S bonds	molecular_function	0.11639	1	3	9339	10	76974	2	1
GO:0008987	quinolinate synthetase A activity	molecular_function	0.11977	1	2	9339	5	76974	2	0
GO:0008193	tRNA guanylyltransferase activity	molecular_function	0.14182	1	3	9339	11	76974	2	1
GO:0009379	Holliday junction helicase complex	cellular_component	0.15421	1	2	9339	6	76974	2	0
GO:0048476	Holliday junction resolvase complex	cellular_component	0.15421	1	2	9339	6	76974	2	0
GO:0004650	polygalacturonase activity	molecular_function	0.15952	1	10	9339	58	76974	2	8
GO:0009435	NAD biosynthetic process	biological_process	0.16498	1	2	9339	6	76974	2	0
GO:0019674	NAD metabolic process	biological_process	0.16498	1	2	9339	6	76974	2	0
GO:0009081	branched-chain amino acid metabolic process	biological_process	0.17989	1	5	9339	25	76974	2	3
GO:0009082	branched-chain amino acid biosynthetic process	biological_process	0.17989	1	5	9339	25	76974	2	3
GO:0050750	low-density lipoprotein particle receptor binding	molecular_function	0.20414	1	2	9339	7	76974	2	0
GO:0070325	lipoprotein particle receptor binding	molecular_function	0.20414	1	2	9339	7	76974	2	0
GO:0008156	negative regulation of DNA replication	biological_process	0.21039	1	2	9339	7	76974	2	0
GO:0048478	replication fork protection	biological_process	0.21039	1	2	9339	7	76974	2	0
GO:0051053	negative regulation of DNA metabolic process	biological_process	0.21039	1	2	9339	7	76974	2	0
GO:0090329	regulation of DNA-dependent DNA replication	biological_process	0.21039	1	2	9339	7	76974	2	0
GO:2000104	negative regulation of DNA-dependent DNA replication	biological_process	0.21039	1	2	9339	7	76974	2	0
GO:0030261	chromosome condensation	biological_process	0.21234	1	6	9339	33	76974	2	4
GO:0000149	SNARE binding	molecular_function	0.21294	1	5	9339	26	76974	2	3
GO:0019905	syntaxin binding	molecular_function	0.21294	1	5	9339	26	76974	2	3
GO:0004089	carbonate dehydratase activity	molecular_function	0.22504	1	9	9339	57	76974	2	7
GO:0045121	membrane raft	cellular_component	0.23755	1	4	9339	21	76974	2	2
GO:0019385	methanogenesis, from acetate	biological_process	0.23852	1	5	9339	27	76974	2	3
GO:0005788	endoplasmic reticulum lumen	cellular_component	0.24128	1	3	9339	14	76974	2	1
GO:0005539	glycosaminoglycan binding	molecular_function	0.24558	1	4	9339	21	76974	2	2
GO:0051262	protein tetramerization	biological_process	0.25106	1	4	9339	21	76974	2	2
GO:0018759	methenyltetrahydromethanopterin cyclohydrolase activity	molecular_function	0.25667	1	2	9339	8	76974	2	0
GO:0006826	iron ion transport	biological_process	0.25933	1	6	9339	37	76974	2	4
GO:0019825	oxygen binding	molecular_function	0.26316	1	3	9339	15	76974	2	1
GO:0009292	genetic transfer	biological_process	0.26853	1	3	9339	15	76974	2	1
GO:0005201	extracellular matrix structural constituent	molecular_function	0.2758	1	2	9339	9	76974	2	0
GO:0005381	iron ion transmembrane transporter activity	molecular_function	0.28131	1	6	9339	38	76974	2	4
GO:0035257	nuclear hormone receptor binding	molecular_function	0.28183	1	3	9339	15	76974	2	1
GO:0051427	hormone receptor binding	molecular_function	0.28183	1	3	9339	15	76974	2	1
GO:0034227	tRNA thio-modification	biological_process	0.2884	1	4	9339	23	76974	2	2
GO:0015093	ferrous iron transmembrane transporter activity	molecular_function	0.29395	1	2	9339	9	76974	2	0
GO:0015684	ferrous iron transport	biological_process	0.29395	1	2	9339	9	76974	2	0
GO:0008990	rRNA (guanine-N2-)-methyltransferase activity	molecular_function	0.30026	1	2	9339	9	76974	2	0
GO:0016435	rRNA (guanine) methyltransferase activity	molecular_function	0.30026	1	2	9339	9	76974	2	0
GO:0008201	heparin binding	molecular_function	0.3016	1	2	9339	9	76974	2	0
GO:0009233	menaquinone metabolic process	biological_process	0.3055	1	2	9339	9	76974	2	0
GO:0009234	menaquinone biosynthetic process	biological_process	0.3055	1	2	9339	9	76974	2	0
GO:0045005	DNA-dependent DNA replication maintenance of fidelity	biological_process	0.30698	1	2	9339	9	76974	2	0
GO:0008537	proteasome activator complex	cellular_component	0.31611	1	3	9339	16	76974	2	1
GO:0006449	regulation of translational termination	biological_process	0.32368	1	3	9339	18	76974	2	1
GO:0006452	translational frameshifting	biological_process	0.32368	1	3	9339	18	76974	2	1
GO:0034250	positive regulation of cellular amide metabolic process	biological_process	0.32368	1	3	9339	18	76974	2	1
GO:0043243	positive regulation of protein complex disassembly	biological_process	0.32368	1	3	9339	18	76974	2	1
GO:0045727	positive regulation of translation	biological_process	0.32368	1	3	9339	18	76974	2	1
GO:0045901	positive regulation of translational elongation	biological_process	0.32368	1	3	9339	18	76974	2	1
GO:0045905	positive regulation of translational termination	biological_process	0.32368	1	3	9339	18	76974	2	1
GO:0009975	cyclase activity	molecular_function	0.32985	1	5	9339	31	76974	2	3
GO:0006848	pyruvate transport	biological_process	0.33229	1	2	9339	10	76974	2	0
GO:0006850	mitochondrial pyruvate transport	biological_process	0.33229	1	2	9339	10	76974	2	0
GO:0046933	proton-transporting ATP synthase activity, rotational mechanism	molecular_function	0.33603	1	6	9339	40	76974	2	4
GO:0017108	5'-flap endonuclease activity	molecular_function	0.34643	1	2	9339	10	76974	2	0
GO:0033557	Slx1-Slx4 complex	cellular_component	0.34643	1	2	9339	10	76974	2	0
GO:0048256	flap endonuclease activity	molecular_function	0.34643	1	2	9339	10	76974	2	0
GO:0032269	negative regulation of cellular protein metabolic process	biological_process	0.34747	1	13	9339	94	76974	2	11
GO:0051248	negative regulation of protein metabolic process	biological_process	0.34747	1	13	9339	94	76974	2	11
GO:0000154	rRNA modification	biological_process	0.34854	1	2	9339	10	76974	2	0
GO:0031167	rRNA methylation	biological_process	0.34854	1	2	9339	10	76974	2	0
GO:0016671	oxidoreductase activity, acting on a sulfur group of donors, disulfide as acceptor	molecular_function	0.35207	1	5	9339	34	76974	2	3
GO:0031225	anchored component of membrane	cellular_component	0.3524	1	4	9339	25	76974	2	2
GO:0006730	one-carbon metabolic process	biological_process	0.35343	1	2	9339	10	76974	2	0
GO:0036442	hydrogen-exporting ATPase activity	molecular_function	0.36485	1	3	9339	18	76974	2	1
GO:0046961	proton-transporting ATPase activity, rotational mechanism	molecular_function	0.36485	1	3	9339	18	76974	2	1
GO:0004819	glutamine-tRNA ligase activity	molecular_function	0.38125	1	3	9339	18	76974	2	1
GO:0006425	glutaminyl-tRNA aminoacylation	biological_process	0.38125	1	3	9339	18	76974	2	1
GO:0043087	regulation of GTPase activity	biological_process	0.3816	1	3	9339	18	76974	2	1
GO:0003917	DNA topoisomerase type I activity	molecular_function	0.38379	1	5	9339	33	76974	2	3
GO:0005986	sucrose biosynthetic process	biological_process	0.38499	1	3	9339	18	76974	2	1
GO:0050307	sucrose-phosphate phosphatase activity	molecular_function	0.38499	1	3	9339	18	76974	2	1
GO:0000390	spliceosomal complex disassembly	biological_process	0.39401	1	2	9339	11	76974	2	0
GO:0005684	U2-type spliceosomal complex	cellular_component	0.39401	1	2	9339	11	76974	2	0
GO:0032988	ribonucleoprotein complex disassembly	biological_process	0.39401	1	2	9339	11	76974	2	0
GO:0071008	U2-type post-mRNA release spliceosomal complex	cellular_component	0.39401	1	2	9339	11	76974	2	0
GO:0071014	post-mRNA release spliceosomal complex	cellular_component	0.39401	1	2	9339	11	76974	2	0
GO:0007267	cell-cell signaling	biological_process	0.39468	1	4	9339	26	76974	2	2
GO:0016593	Cdc73/Paf1 complex	cellular_component	0.42492	1	5	9339	36	76974	2	3
GO:0003697	single-stranded DNA binding	molecular_function	0.43703	1	10	9339	75	76974	2	8
GO:0052855	ADP-dependent NAD(P)H-hydrate dehydratase activity	molecular_function	0.43846	1	2	9339	12	76974	2	0
GO:0004832	valine-tRNA ligase activity	molecular_function	0.44956	1	3	9339	20	76974	2	1
GO:0006438	valyl-tRNA aminoacylation	biological_process	0.44956	1	3	9339	20	76974	2	1
GO:0007205	protein kinase C-activating G-protein coupled receptor signaling pathway	biological_process	0.45848	1	4	9339	28	76974	2	2
GO:0003997	acyl-CoA oxidase activity	molecular_function	0.4629	1	4	9339	28	76974	2	2
GO:0010038	response to metal ion	biological_process	0.46369	1	4	9339	29	76974	2	2
GO:0032270	positive regulation of cellular protein metabolic process	biological_process	0.46607	1	5	9339	38	76974	2	3
GO:0051247	positive regulation of protein metabolic process	biological_process	0.46607	1	5	9339	38	76974	2	3
GO:0006083	acetate metabolic process	biological_process	0.46746	1	7	9339	52	76974	2	5
GO:0006448	regulation of translational elongation	biological_process	0.48707	1	3	9339	23	76974	2	1
GO:0006635	fatty acid beta-oxidation	biological_process	0.48882	1	4	9339	29	76974	2	2
GO:0009062	fatty acid catabolic process	biological_process	0.48882	1	4	9339	29	76974	2	2
GO:0019395	fatty acid oxidation	biological_process	0.48882	1	4	9339	29	76974	2	2
GO:0034440	lipid oxidation	biological_process	0.48882	1	4	9339	29	76974	2	2
GO:0004618	phosphoglycerate kinase activity	molecular_function	0.49575	1	4	9339	30	76974	2	2
GO:0017150	tRNA dihydrouridine synthase activity	molecular_function	0.5054	1	4	9339	30	76974	2	2
GO:0019082	viral protein processing	biological_process	0.50954	1	4	9339	30	76974	2	2
GO:0004609	phosphatidylserine decarboxylase activity	molecular_function	0.5185	1	2	9339	14	76974	2	0
GO:0019203	carbohydrate phosphatase activity	molecular_function	0.51925	1	3	9339	22	76974	2	1
GO:0050308	sugar-phosphatase activity	molecular_function	0.51925	1	3	9339	22	76974	2	1
GO:0045261	proton-transporting ATP synthase complex, catalytic core F(1)	cellular_component	0.51955	1	4	9339	31	76974	2	2
GO:0006568	tryptophan metabolic process	biological_process	0.52303	1	4	9339	31	76974	2	2
GO:0006586	indolalkylamine metabolic process	biological_process	0.52303	1	4	9339	31	76974	2	2
GO:0042430	indole-containing compound metabolic process	biological_process	0.52303	1	4	9339	31	76974	2	2
GO:0003964	RNA-directed DNA polymerase activity	molecular_function	0.52592	1	3	9339	22	76974	2	1
GO:0016559	peroxisome fission	biological_process	0.52961	1	4	9339	34	76974	2	2
GO:0051345	positive regulation of hydrolase activity	biological_process	0.53477	1	2	9339	14	76974	2	0
GO:0098609	cell-cell adhesion	biological_process	0.53523	1	4	9339	31	76974	2	2
GO:0043022	ribosome binding	molecular_function	0.53957	1	3	9339	25	76974	2	1
GO:0031124	mRNA 3'-end processing	biological_process	0.54186	1	4	9339	32	76974	2	2
GO:0007268	synaptic transmission	biological_process	0.54406	1	3	9339	23	76974	2	1
GO:0007166	cell surface receptor signaling pathway	biological_process	0.54752	1	13	9339	111	76974	2	11
GO:0016774	phosphotransferase activity, carboxyl group as acceptor	molecular_function	0.54941	1	4	9339	32	76974	2	2
GO:0005785	signal recognition particle receptor complex	cellular_component	0.55055	1	4	9339	32	76974	2	2
GO:0019220	regulation of phosphate metabolic process	biological_process	0.55477	1	8	9339	67	76974	2	6
GO:0051174	regulation of phosphorus metabolic process	biological_process	0.55477	1	8	9339	67	76974	2	6
GO:0004143	diacylglycerol kinase activity	molecular_function	0.56137	1	4	9339	32	76974	2	2
GO:0004332	fructose-bisphosphate aldolase activity	molecular_function	0.56289	1	5	9339	42	76974	2	3
GO:0005778	peroxisomal membrane	cellular_component	0.56419	1	5	9339	44	76974	2	3
GO:0005779	integral component of peroxisomal membrane	cellular_component	0.56419	1	5	9339	44	76974	2	3
GO:0031231	intrinsic component of peroxisomal membrane	cellular_component	0.56419	1	5	9339	44	76974	2	3
GO:0031903	microbody membrane	cellular_component	0.56419	1	5	9339	44	76974	2	3
GO:0044438	microbody part	cellular_component	0.56419	1	5	9339	44	76974	2	3
GO:0044439	peroxisomal part	cellular_component	0.56419	1	5	9339	44	76974	2	3
GO:0072329	monocarboxylic acid catabolic process	biological_process	0.56531	1	4	9339	32	76974	2	2
GO:0050664	oxidoreductase activity, acting on NAD(P)H, oxygen as acceptor	molecular_function	0.56914	1	2	9339	15	76974	2	0
GO:0008686	3,4-dihydroxy-2-butanone-4-phosphate synthase activity	molecular_function	0.57033	1	2	9339	15	76974	2	0
GO:0008146	sulfotransferase activity	molecular_function	0.5762	1	8	9339	70	76974	2	6
GO:0005786	signal recognition particle, endoplasmic reticulum targeting	cellular_component	0.57978	1	4	9339	34	76974	2	2
GO:0030942	endoplasmic reticulum signal peptide binding	molecular_function	0.57978	1	4	9339	34	76974	2	2
GO:0006029	proteoglycan metabolic process	biological_process	0.58322	1	3	9339	24	76974	2	1
GO:0015012	heparan sulfate proteoglycan biosynthetic process	biological_process	0.58322	1	3	9339	24	76974	2	1
GO:0030166	proteoglycan biosynthetic process	biological_process	0.58322	1	3	9339	24	76974	2	1
GO:0030201	heparan sulfate proteoglycan metabolic process	biological_process	0.58322	1	3	9339	24	76974	2	1
GO:0044242	cellular lipid catabolic process	biological_process	0.59531	1	4	9339	33	76974	2	2
GO:0005834	heterotrimeric G-protein complex	cellular_component	0.59851	1	3	9339	26	76974	2	1
GO:0019897	extrinsic component of plasma membrane	cellular_component	0.59851	1	3	9339	26	76974	2	1
GO:0031234	extrinsic component of cytoplasmic side of plasma membrane	cellular_component	0.59851	1	3	9339	26	76974	2	1
GO:0010821	regulation of mitochondrion organization	biological_process	0.60503	1	2	9339	16	76974	2	0
GO:0010822	positive regulation of mitochondrion organization	biological_process	0.60503	1	2	9339	16	76974	2	0
GO:0090199	regulation of release of cytochrome c from mitochondria	biological_process	0.60503	1	2	9339	16	76974	2	0
GO:0090200	positive regulation of release of cytochrome c from mitochondria	biological_process	0.60503	1	2	9339	16	76974	2	0
GO:0097193	intrinsic apoptotic signaling pathway	biological_process	0.60503	1	2	9339	16	76974	2	0
GO:2001233	regulation of apoptotic signaling pathway	biological_process	0.60503	1	2	9339	16	76974	2	0
GO:2001235	positive regulation of apoptotic signaling pathway	biological_process	0.60503	1	2	9339	16	76974	2	0
GO:0016634	oxidoreductase activity, acting on the CH-CH group of donors, oxygen as acceptor	molecular_function	0.62061	1	4	9339	34	76974	2	2
GO:0019087	transformation of host cell by virus	biological_process	0.62318	1	5	9339	44	76974	2	3
GO:0015833	peptide transport	biological_process	0.6251	1	2	9339	17	76974	2	0
GO:0031123	RNA 3'-end processing	biological_process	0.63894	1	4	9339	36	76974	2	2
GO:0005791	rough endoplasmic reticulum	cellular_component	0.64328	1	4	9339	36	76974	2	2
GO:0030867	rough endoplasmic reticulum membrane	cellular_component	0.64328	1	4	9339	36	76974	2	2
GO:0006879	cellular iron ion homeostasis	biological_process	0.64962	1	3	9339	28	76974	2	1
GO:0046916	cellular transition metal ion homeostasis	biological_process	0.64962	1	3	9339	28	76974	2	1
GO:0055072	iron ion homeostasis	biological_process	0.64962	1	3	9339	28	76974	2	1
GO:0042886	amide transport	biological_process	0.65144	1	2	9339	18	76974	2	0
GO:0006275	regulation of DNA replication	biological_process	0.65843	1	2	9339	18	76974	2	0
GO:0005542	folic acid binding	molecular_function	0.66095	1	2	9339	18	76974	2	0
GO:0072341	modified amino acid binding	molecular_function	0.66095	1	2	9339	18	76974	2	0
GO:0046806	viral scaffold	cellular_component	0.66153	1	6	9339	54	76974	2	4
GO:0004000	adenosine deaminase activity	molecular_function	0.67211	1	3	9339	28	76974	2	1
GO:0004526	ribonuclease P activity	molecular_function	0.67346	1	3	9339	29	76974	2	1
GO:0019207	kinase regulator activity	molecular_function	0.67394	1	9	9339	83	76974	2	7
GO:0006023	aminoglycan biosynthetic process	biological_process	0.67947	1	4	9339	37	76974	2	2
GO:0000372	Group I intron splicing	biological_process	0.69008	1	4	9339	37	76974	2	2
GO:0000376	RNA splicing, via transesterification reactions with guanosine as nucleophile	biological_process	0.69008	1	4	9339	37	76974	2	2
GO:0051346	negative regulation of hydrolase activity	biological_process	0.70056	1	4	9339	40	76974	2	2
GO:0006906	vesicle fusion	biological_process	0.70226	1	2	9339	19	76974	2	0
GO:0048280	vesicle fusion with Golgi apparatus	biological_process	0.70226	1	2	9339	19	76974	2	0
GO:0090174	organelle membrane fusion	biological_process	0.70226	1	2	9339	19	76974	2	0
GO:0098589	membrane region	cellular_component	0.70383	1	4	9339	39	76974	2	2
GO:0046834	lipid phosphorylation	biological_process	0.70463	1	2	9339	20	76974	2	0
GO:0046854	phosphatidylinositol phosphorylation	biological_process	0.70463	1	2	9339	20	76974	2	0
GO:0042176	regulation of protein catabolic process	biological_process	0.71709	1	8	9339	76	76974	2	6
GO:0072528	pyrimidine-containing compound biosynthetic process	biological_process	0.71986	1	10	9339	96	76974	2	8
GO:0005402	cation:sugar symporter activity	molecular_function	0.72281	1	6	9339	58	76974	2	4
GO:0001836	release of cytochrome c from mitochondria	biological_process	0.72735	1	2	9339	20	76974	2	0
GO:0008637	apoptotic mitochondrial changes	biological_process	0.72735	1	2	9339	20	76974	2	0
[truncated: 1,838 more rows]
