# Supplementary material for: <span aria-describedby="tippy-17">Transcriptomic and Metabolomic Profiling Provides Insights into Flavonoids Biosynthesis and Flower Coloring in <em>Loropetalum chinense</em> and <em>Loropetalum chinense</em> var. <em>rubrum</em>
Source: Preprints.org preprint supplement (doi:10.20944/preprints202304.0456.v1), 2023-04-18
Supplement: Supplementary file 23 [file supplementary table S29.xlsx]

## Sheet: Table S29 
Supplementary table S30 The KEGG enrichment analysis of DETs between XNNC VS LDPF group
pathway_term	rich_factor	qvalue	gene_number	ID	P-Value	Corrected P-Value	Input	Hyperlink
Plant hormone signal transduction	0.277989	0.000215387	365	ko04075	1.75112e-06	0.000215387	i3_HQ_LCRFT_c11613/f2p0/2260|i2_LQ_LCRFT_c40359/f1p7/2276|i0_LQ_LCRFT_c146976/f1p0/831|i3_LQ_LCRFT_c36268/f1p0/2403|i5_HQ_LCRFT_c1169/f3p0/4948|i2_LQ_LCRFT_c64565/f1p0/2031|i1_LQ_LCRFT_c169159/f1p4/1949|i1_HQ_LCRFT_c205227/f4p1/1105|i1_HQ_LCRFT_c158324/f21p7/1179|i4_LQ_LCRFT_c28524/f1p1/3285|i1_LQ_LCRFT_c118681/f1p4/1978|i1_HQ_LCRFT_c196557/f4p1/1037|i3_LQ_LCRFT_c95298/f1p0/2372|i3_LQ_LCRFT_c9599…	http://www.genome.jp/kegg-bin/show_pathway?ko04075/K14486%09red/K14487%09red/K14484%09red/K14485%09red/K14488%09red/K14489%09red/K13449%09red/K13946%09red/K13415%09red/K13416%09red/K14432%09red/K14431%09red/K14510%09red/K14512%09red/K14514%09red/K14515%09red/K14516%09red/K14495%09red/K14494%09red/K14497%09red/K14496%09red/K14491%09red/K14490%09red/K14493%09red/K14492%09red/K16189%09red/K14498%09r…
Tyrosine metabolism	0.359551	0.0005901	96	ko00350	9.59512e-06	0.0005901	i3_LQ_LCRFT_c71717/f1p0/2261|i2_HQ_LCRFT_c109284/f3p0/2827|i4_LQ_LCRFT_c10941/f1p0/3116|i1_LQ_LCRFT_c135369/f1p4/1377|i0_LQ_LCRFT_c201452/f1p0/507|i2_LQ_LCRFT_c21640/f1p0/2250|i2_LQ_LCRFT_c30236/f1p0/2036|i1_HQ_LCRFT_c13792/f3p1/1644|i1_HQ_LCRFT_c59092/f3p11/1953|i5_LQ_LCRFT_c18606/f1p0/4134|i2_LQ_LCRFT_c10943/f1p0/2533|i3_LQ_LCRFT_c54276/f1p0/2929|i1_LQ_LCRFT_c219666/f1p3/1028|i1_HQ_LCRFT_c4700/…	http://www.genome.jp/kegg-bin/show_pathway?ko00350/K00276%09red/K14455%09red/K14454%09red/K00001%09red/K00451%09red/K01800%09red/K00817%09red/K15849%09red/K18857%09red/K00811%09red/K01592%09red/K00815%09red/K01555%09red/K07253%09red/K00121%09red/K00457%09red/K00422%09red/K01557%09red
Photosynthesis - antenna proteins	0.407692	0.00300515	53	ko00196	7.32963e-05	0.00300515	i0_LQ_LCRFT_c254371/f2p0/1013|i1_LQ_LCRFT_c94518/f1p13/1916|i1_HQ_LCRFT_c32662/f40p8/1027|i1_LQ_LCRFT_c126858/f1p13/1082|i1_LQ_LCRFT_c60462/f1p8/1223|i1_LQ_LCRFT_c194108/f1p10/1248|i0_HQ_LCRFT_c243752/f2p0/746|i2_LQ_LCRFT_c22903/f1p0/2216|i0_LQ_LCRFT_c13337/f1p1/804|i2_LQ_LCRFT_c72214/f1p0/2604|i0_LQ_LCRFT_c199134/f1p6/790|i1_LQ_LCRFT_c171149/f1p7/1207|i0_HQ_LCRFT_c67209/f3p0/1011|i1_LQ_LCRFT_c16…	http://www.genome.jp/kegg-bin/show_pathway?ko00196/K08907%09red/K08908%09red/K08909%09red/K08915%09red/K08914%09red/K08917%09red/K08916%09red/K08911%09red/K08910%09red/K08913%09red/K08912%09red
Plant-pathogen interaction	0.264167	0.00790613	303	ko04626	0.00025711	0.00790613	i3_HQ_LCRFT_c123546/f4p0/2497|i5_LQ_LCRFT_c15901/f1p5/4054|i4_HQ_LCRFT_c71746/f2p0/3374|i4_LQ_LCRFT_c58588/f1p1/3129|i2_LQ_LCRFT_c6875/f1p0/2405|i3_LQ_LCRFT_c84667/f1p8/2074|i2_LQ_LCRFT_c53289/f1p0/2928|i3_LQ_LCRFT_c56774/f1p1/2437|i3_LQ_LCRFT_c28424/f1p20/2320|i1_LQ_LCRFT_c96720/f1p1/1697|i2_LQ_LCRFT_c40350/f1p0/2507|i1_LQ_LCRFT_c222111/f1p3/1066|i4_HQ_LCRFT_c68659/f4p0/3475|i5_LQ_LCRFT_c3496/f1…	http://www.genome.jp/kegg-bin/show_pathway?ko04626/K18835%09red/K18834%09red/K12795%09red/K13414%09red/K13416%09red/K09487%09red/K13412%09red/K13413%09red/K13456%09red/K13457%09red/K13459%09red/K13430%09red/K13436%09red/K02183%09red/K13449%09red/K13448%09red/K05391%09red/K00864%09red/K13429%09red/K04368%09red/K18875%09red/K04079%09red/K13447%09red/K13420%09red/K13425%09red/K13424%09red/K13427%09r…
Sesquiterpenoid and triterpenoid biosynthesis	0.364238	0.011449	55	ko00909	0.000531666	0.011449	i4_LQ_LCRFT_c39167/f1p49/3326|i2_LQ_LCRFT_c70938/f1p0/2223|i1_LQ_LCRFT_c98606/f1p0/1684|i2_LQ_LCRFT_c111118/f1p0/2413|i4_LQ_LCRFT_c43854/f1p0/3718|i3_LQ_LCRFT_c110726/f1p0/2386|i4_LQ_LCRFT_c73158/f1p0/3683|i3_LQ_LCRFT_c38917/f1p0/2273|i5_LQ_LCRFT_c5196/f1p0/4551|i1_LQ_LCRFT_c96955/f1p0/1938|i1_LQ_LCRFT_c98043/f1p0/1703|i2_LQ_LCRFT_c38206/f1p1/2177|i2_LQ_LCRFT_c44301/f1p1/2185|i7_LQ_LCRFT_c128/f1p…	http://www.genome.jp/kegg-bin/show_pathway?ko00909/K00511%09red/K15813%09red/K15803%09red/K00801%09red
Phenylpropanoid biosynthesis	0.278997	0.011449	178	ko00940	0.00060479	0.011449	i1_LQ_LCRFT_c70583/f1p0/1175|i1_HQ_LCRFT_c6525/f6p3/1743|i4_LQ_LCRFT_c57529/f1p0/3394|i3_LQ_LCRFT_c96505/f1p2/2353|i0_LQ_LCRFT_c3727/f1p0/681|i1_LQ_LCRFT_c119687/f1p4/1722|i4_LQ_LCRFT_c48143/f1p1/3051|i1_LQ_LCRFT_c137709/f1p0/1748|i3_LQ_LCRFT_c73281/f1p0/2793|i1_HQ_LCRFT_c66261/f2p6/1588|i3_LQ_LCRFT_c10565/f1p0/2609|i1_LQ_LCRFT_c3961/f1p3/1691|i1_LQ_LCRFT_c94170/f1p6/1857|i2_LQ_LCRFT_c12598/f1p0/…	http://www.genome.jp/kegg-bin/show_pathway?ko00940/K00588%09red/K13065%09red/K10775%09red/K13066%09red/K01188%09red/K00083%09red/K12355%09red/K12356%09red/K05350%09red/K01904%09red/K09754%09red/K09755%09red/K00430%09red/K00487%09red/K05349%09red/K09753%09red
Fatty acid biosynthesis	0.302452	0.011449	111	ko00061	0.000651572	0.011449	i1_LQ_LCRFT_c162588/f1p7/1798|i2_LQ_LCRFT_c12853/f1p0/2653|i1_LQ_LCRFT_c116353/f1p3/1644|i2_LQ_LCRFT_c72138/f1p1/2626|i2_HQ_LCRFT_c118551/f35p0/2607|i4_LQ_LCRFT_c20227/f1p6/3895|i5_LQ_LCRFT_c4107/f1p1/4275|i2_LQ_LCRFT_c94983/f1p0/2974|i3_LQ_LCRFT_c96282/f1p1/2806|i2_LQ_LCRFT_c99467/f1p3/2544|i4_LQ_LCRFT_c3823/f1p5/3225|i1_HQ_LCRFT_c89121/f2p3/1934|i5_LQ_LCRFT_c4878/f1p0/4241|i1_LQ_LCRFT_c72990/f1…	http://www.genome.jp/kegg-bin/show_pathway?ko00061/K10781%09red/K02372%09red/K10782%09red/K00648%09red/K01961%09red/K00665%09red/K01963%09red/K01962%09red/K02160%09red/K01897%09red/K11262%09red/K03921%09red/K00208%09red/K09458%09red
Cutin, suberine and wax biosynthesis	0.29863	0.0159127	109	ko00073	0.00103497	0.0159127	i3_LQ_LCRFT_c25157/f1p0/2621|i2_HQ_LCRFT_c25231/f3p0/2805|i3_LQ_LCRFT_c8642/f1p10/2556|i1_LQ_LCRFT_c42813/f1p0/1868|i3_LQ_LCRFT_c79814/f1p0/2603|i1_LQ_LCRFT_c41275/f1p0/1447|i1_LQ_LCRFT_c94220/f1p1/1834|i1_LQ_LCRFT_c96482/f1p5/1604|i1_LQ_LCRFT_c38778/f1p8/1869|i3_LQ_LCRFT_c84113/f1p0/2047|i1_LQ_LCRFT_c181094/f1p0/1929|i4_LQ_LCRFT_c32409/f1p0/3034|i2_HQ_LCRFT_c7774/f2p0/2208|i2_HQ_LCRFT_c11177/f2p…	http://www.genome.jp/kegg-bin/show_pathway?ko00073/K13356%09red/K15404%09red/K15401%09red/K15400%09red/K15403%09red/K15398%09red
Isoquinoline alkaloid biosynthesis	0.346405	0.0207013	53	ko00950	0.0016375	0.0207013	i1_HQ_LCRFT_c14934/f8p2/1591|i3_LQ_LCRFT_c71717/f1p0/2261|i2_LQ_LCRFT_c21640/f1p0/2250|i2_HQ_LCRFT_c109284/f3p0/2827|i4_LQ_LCRFT_c10941/f1p0/3116|i2_LQ_LCRFT_c77849/f1p3/2291|i1_LQ_LCRFT_c3840/f1p0/1344|i2_LQ_LCRFT_c18054/f6p0/2152|i3_HQ_LCRFT_c26239/f5p4/2836|i1_LQ_LCRFT_c12763/f1p1/1491|i2_LQ_LCRFT_c30236/f1p0/2036|i1_LQ_LCRFT_c36907/f1p5/1793|i3_LQ_LCRFT_c26951/f1p41/2979|i1_HQ_LCRFT_c59092/f3…	http://www.genome.jp/kegg-bin/show_pathway?ko00950/K00276%09red/K14455%09red/K14454%09red/K15849%09red/K00811%09red/K13397%09red/K00815%09red/K01592%09red/K00422%09red
Monoterpenoid biosynthesis	0.426471	0.0207013	29	ko00902	0.00168303	0.0207013	i1_HQ_LCRFT_c80537/f4p3/1057|i4_LQ_LCRFT_c77571/f1p2/3729|i4_LQ_LCRFT_c72996/f1p1/3939|i1_LQ_LCRFT_c76640/f1p1/1138|i5_LQ_LCRFT_c5291/f1p0/4313|i1_LQ_LCRFT_c163126/f1p0/1177|i1_LQ_LCRFT_c170706/f1p2/1946|i1_HQ_LCRFT_c131456/f2p5/1236|i1_LQ_LCRFT_c98359/f1p0/1807|i5_LQ_LCRFT_c1855/f2p0/4520|i4_LQ_LCRFT_c45680/f1p0/3289|i2_HQ_LCRFT_c11745/f3p0/2145|i1_LQ_LCRFT_c115956/f1p4/1148|i4_HQ_LCRFT_c26281/f…	http://www.genome.jp/kegg-bin/show_pathway?ko00902/K15086%09red/K18108%09red/K15095%09red
Cyanoamino acid metabolism	0.29003	0.0443492	96	ko00460	0.00396619	0.0443492	i1_LQ_LCRFT_c77926/f1p0/1430|i1_LQ_LCRFT_c70583/f1p0/1175|i1_HQ_LCRFT_c6525/f6p3/1743|i1_LQ_LCRFT_c24381/f1p5/1757|i4_HQ_LCRFT_c68824/f7p0/3189|i3_LQ_LCRFT_c73281/f1p0/2793|i3_LQ_LCRFT_c10565/f1p0/2609|i4_HQ_LCRFT_c2258/f2p0/3255|i1_LQ_LCRFT_c3961/f1p3/1691|i4_LQ_LCRFT_c80969/f1p0/3409|i4_LQ_LCRFT_c22586/f1p0/3793|i1_HQ_LCRFT_c183219/f4p1/1802|i2_LQ_LCRFT_c75755/f1p0/2349|i3_LQ_LCRFT_c18563/f1p0/…	http://www.genome.jp/kegg-bin/show_pathway?ko00460/K12153%09red/K01188%09red/K18592%09red/K00600%09red/K05350%09red/K13034%09red/K13029%09red/K05349%09red/K13035%09red/K01455%09red
Carotenoid biosynthesis	0.307692	0.0760625	60	ko00906	0.00742073	0.0760625	i1_HQ_LCRFT_c57254/f2p1/1302|i2_LQ_LCRFT_c8691/f1p0/2562|i3_LQ_LCRFT_c24908/f1p0/2211|i2_LQ_LCRFT_c44512/f1p0/2482|i3_LQ_LCRFT_c13506/f1p0/2391|i1_HQ_LCRFT_c1849/f14p3/1732|i1_HQ_LCRFT_c93503/f2p8/1256|i1_LQ_LCRFT_c138414/f1p4/1745|i1_LQ_LCRFT_c120250/f1p0/1597|i1_HQ_LCRFT_c18440/f12p2/1630|i2_LQ_LCRFT_c80059/f1p0/2103|i3_HQ_LCRFT_c108390/f5p0/2434|i1_LQ_LCRFT_c50642/f3p1/1320|i1_LQ_LCRFT_c137917…	http://www.genome.jp/kegg-bin/show_pathway?ko00906/K09841%09red/K09840%09red/K14595%09red/K09842%09red/K09843%09red/K02291%09red/K02293%09red/K06444%09red/K09835%09red/K15744%09red/K15747%09red/K15746%09red/K06443%09red/K09839%09red/K09838%09red/K00514%09red
Glycosaminoglycan degradation	0.309524	0.103594	52	ko00531	0.010949	0.103594	i2_LQ_LCRFT_c111220/f1p2/2897|i3_LQ_LCRFT_c112147/f1p0/2115|i1_LQ_LCRFT_c57615/f1p8/1749|i2_LQ_LCRFT_c63811/f1p0/2066|i1_LQ_LCRFT_c190203/f1p0/1821|i2_HQ_LCRFT_c9115/f2p0/2705|i4_LQ_LCRFT_c27711/f1p0/3853|i1_LQ_LCRFT_c168595/f1p6/2007|i1_LQ_LCRFT_c38933/f1p3/1979|i4_LQ_LCRFT_c80431/f1p0/3290|i2_LQ_LCRFT_c71401/f1p0/2130|i1_LQ_LCRFT_c168617/f1p1/1507|i2_LQ_LCRFT_c94577/f1p0/2552|i2_LQ_LCRFT_c56579…	http://www.genome.jp/kegg-bin/show_pathway?ko00531/K10532%09red/K07964%09red/K12309%09red/K12373%09red/K01205%09red
Starch and sucrose metabolism	0.240141	0.127539	341	ko00500	0.0145167	0.127539	i4_HQ_LCRFT_c68963/f9p0/3371|i1_LQ_LCRFT_c189056/f1p14/1458|i1_LQ_LCRFT_c70583/f1p0/1175|i3_LQ_LCRFT_c54349/f1p0/2179|i1_HQ_LCRFT_c6525/f6p3/1743|i1_HQ_LCRFT_c1965/f5p3/1847|i4_LQ_LCRFT_c40425/f1p0/3612|i1_HQ_LCRFT_c96211/f4p1/1810|i1_HQ_LCRFT_c207586/f57p8/1473|i4_LQ_LCRFT_c86756/f2p0/3052|i4_LQ_LCRFT_c31781/f1p0/3013|i2_LQ_LCRFT_c80325/f1p0/2568|i1_HQ_LCRFT_c148676/f2p0/1063|i0_LQ_LCRFT_c55216/…	http://www.genome.jp/kegg-bin/show_pathway?ko00500/K00703%09red/K01176%09red/K01177%09red/K01179%09red/K16055%09red/K01810%09red/K00847%09red/K18447%09red/K00975%09red/K01187%09red/K08678%09red/K01188%09red/K00844%09red/K00705%09red/K00688%09red/K01213%09red/K05350%09red/K00963%09red/K00012%09red/K01087%09red/K19892%09red/K19893%09red/K15920%09red/K19891%09red/K01835%09red/K01184%09red/K01193%09r…
Flavonoid biosynthesis	0.280899	0.141297	75	ko00941	0.0174505	0.141297	i1_LQ_LCRFT_c163150/f1p5/1292|i1_HQ_LCRFT_c39681/f3p11/1361|i1_LQ_LCRFT_c58152/f1p1/1755|i1_HQ_LCRFT_c196599/f2p2/1364|i3_LQ_LCRFT_c55538/f1p0/2363|i1_HQ_LCRFT_c156486/f35p5/1294|i2_LQ_LCRFT_c79439/f1p0/2132|i3_LQ_LCRFT_c40215/f1p0/2125|i3_LQ_LCRFT_c27842/f1p1/2118|i2_HQ_LCRFT_c43940/f2p2/2555|i4_HQ_LCRFT_c21070/f3p2/3976|i4_HQ_LCRFT_c17984/f3p1/3355|i2_LQ_LCRFT_c42043/f1p0/2426|i1_LQ_LCRFT_c1959…	http://www.genome.jp/kegg-bin/show_pathway?ko00941/K13065%09red/K08695%09red/K13083%09red/K13082%09red/K13081%09red/K01859%09red/K00475%09red/K05277%09red/K00660%09red/K09754%09red/K00588%09red/K05278%09red/K00487%09red/K05280%09red
Synthesis and degradation of ketone bodies	0.372881	0.141297	22	ko00072	0.0184942	0.141297	i2_LQ_LCRFT_c14881/f1p0/2218|i1_LQ_LCRFT_c120448/f1p4/1862|i2_LQ_LCRFT_c9075/f1p2/2339|i1_LQ_LCRFT_c4370/f1p1/1841|i1_HQ_LCRFT_c71373/f2p3/1917|i1_HQ_LCRFT_c204622/f3p7/1588|i1_HQ_LCRFT_c207536/f21p4/1857|i1_LQ_LCRFT_c70267/f1p3/1883|i1_HQ_LCRFT_c27645/f2p5/1594|i5_LQ_LCRFT_c3162/f1p4/4713|i1_LQ_LCRFT_c166265/f1p4/1854|i3_LQ_LCRFT_c76314/f1p0/2869|i1_HQ_LCRFT_c9314/f15p9/1785|i4_LQ_LCRFT_c56737/f…	http://www.genome.jp/kegg-bin/show_pathway?ko00072/K01640%09red/K01641%09red/K00626%09red
Phenylalanine, tyrosine and tryptophan biosynthesis	0.266839	0.141297	103	ko00400	0.0195289	0.141297	i2_LQ_LCRFT_c26406/f1p0/2318|i4_LQ_LCRFT_c10941/f1p0/3116|i2_LQ_LCRFT_c52246/f1p0/2826|i4_HQ_LCRFT_c50821/f19p0/3153|i1_HQ_LCRFT_c58461/f2p1/1371|i3_HQ_LCRFT_c32611/f42p0/2099|i2_HQ_LCRFT_c43173/f2p0/2581|i3_HQ_LCRFT_c120272/f11p0/2163|i1_LQ_LCRFT_c36907/f1p5/1793|i1_HQ_LCRFT_c13792/f3p1/1644|i5_LQ_LCRFT_c5354/f1p1/4213|i2_LQ_LCRFT_c66009/f1p0/2039|i2_LQ_LCRFT_c76228/f1p7/2835|i4_LQ_LCRFT_c4499/f…	http://www.genome.jp/kegg-bin/show_pathway?ko00400/K06001%09red/K14455%09red/K14454%09red/K00811%09red/K01695%09red/K00891%09red/K01696%09red/K15849%09red/K01626%09red/K01736%09red/K01658%09red/K01735%09red/K13832%09red/K00815%09red/K01657%09red/K00817%09red/K01817%09red/K01850%09red/K05359%09red/K15227%09red/K00800%09red
Linoleic acid metabolism	0.278481	0.189899	66	ko00591	0.02779	0.189899	i2_LQ_LCRFT_c22070/f1p0/2931|i4_LQ_LCRFT_c48927/f1p0/3038|i4_HQ_LCRFT_c88200/f142p0/3386|i4_LQ_LCRFT_c84361/f1p0/3019|i2_LQ_LCRFT_c74794/f1p13/2364|i3_LQ_LCRFT_c8545/f1p0/2854|i3_LQ_LCRFT_c6214/f1p0/2986|i5_LQ_LCRFT_c2173/f1p0/4601|i2_LQ_LCRFT_c117209/f1p0/2029|i5_LQ_LCRFT_c6236/f1p0/4116|i4_LQ_LCRFT_c66090/f1p0/3024|i3_HQ_LCRFT_c111892/f2p0/2759|i4_HQ_LCRFT_c87341/f62p0/3226|i2_LQ_LCRFT_c35399/f…	http://www.genome.jp/kegg-bin/show_pathway?ko00591/K14674%09red/K00454%09red/K15718%09red/K07418%09red
Galactose metabolism	0.249153	0.240541	147	ko00052	0.0371567	0.240541	i1_LQ_LCRFT_c28490/f1p2/1852|i1_LQ_LCRFT_c79312/f1p22/1472|i4_LQ_LCRFT_c43313/f1p0/3219|i4_LQ_LCRFT_c27711/f1p0/3853|i4_LQ_LCRFT_c37865/f1p1/3122|i1_LQ_LCRFT_c79328/f1p1/1455|i1_HQ_LCRFT_c184390/f6p2/1697|i4_HQ_LCRFT_c22069/f2p0/3223|i2_LQ_LCRFT_c103926/f1p0/3007|i4_LQ_LCRFT_c7718/f1p5/3897|i3_LQ_LCRFT_c71398/f1p7/2241|i4_LQ_LCRFT_c76098/f1p5/3427|i2_HQ_LCRFT_c33982/f2p5/2250|i1_LQ_LCRFT_c23496/f…	http://www.genome.jp/kegg-bin/show_pathway?ko00052/K01193%09red/K01190%09red/K00850%09red/K01187%09red/K00844%09red/K01835%09red/K12447%09red/K18819%09red/K01785%09red/K12309%09red/K01784%09red/K00963%09red/K06611%09red/K07407%09red/K00965%09red/K06617%09red
Glutathione metabolism	0.248696	0.241121	143	ko00480	0.0409172	0.241121	i0_LQ_LCRFT_c10338/f1p0/997|i1_HQ_LCRFT_c13901/f3p3/1546|i2_LQ_LCRFT_c26964/f1p4/2765|i0_HQ_LCRFT_c157175/f2p0/960|i1_LQ_LCRFT_c205505/f84p11/1227|i1_LQ_LCRFT_c161726/f1p14/1339|i3_LQ_LCRFT_c61687/f1p0/2764|i0_LQ_LCRFT_c317851/f3p0/904|i1_LQ_LCRFT_c117129/f1p0/1131|i0_LQ_LCRFT_c341074/f1p0/889|i1_LQ_LCRFT_c76480/f1p1/1930|i1_LQ_LCRFT_c41892/f1p4/1525|i1_LQ_LCRFT_c98367/f1p0/1745|i4_HQ_LCRFT_c1421…	http://www.genome.jp/kegg-bin/show_pathway?ko00480/K10808%09red/K01255%09red/K01256%09red/K18592%09red/K00797%09red/K00036%09red/K00799%09red/K00383%09red/K00432%09red/K01469%09red/K00033%09red/K00434%09red/K00031%09red
