# Supplementary material for: <span aria-describedby="tippy-17">Transcriptomic and Metabolomic Profiling Provides Insights into Flavonoids Biosynthesis and Flower Coloring in <em>Loropetalum chinense</em> and <em>Loropetalum chinense</em> var. <em>rubrum</em>
Source: Preprints.org preprint supplement (doi:10.20944/preprints202304.0456.v1), 2023-04-18
Supplement: Supplementary file 24 [file supplementary table S3.xlsx]

## Sheet: Table S3 
Supplementary Table S3 The differential accumulated metabolites in group of LDPF VS XNFJ
Index	Compounds	Class	LDPF1	LDPF2	LDPF3	XNFJ1	XNFJ2	XNFJ3	VIP	Fold_Change	LogFC
pmb0600	Chrysoeriol 7-O-rutinoside	Flavone	9	9	9	4310000	5010000	4780000	3.1058	522222	18.9943
pmb0579	Chrysoeriol O-sinapoylhexoside	Flavone	9	9	9	50200	35900	53200	2.50003	5159.26	12.3329
pme0367	Apigenin 7-rutinoside (Isorhoifolin)	Flavone	9	9	9	52500	33700	50900	2.49674	5077.78	12.31
pmf0616	Malvidin 3-acetyl-5-diglucoside	Anthocyanins	9	9	9	10800	15100	14500	2.31245	1496.3	10.5472
pma6515	C-hexosyl-chrysin O-feruloylhexoside	Flavone	9	9	9	8500	11100	7650	2.24884	1009.26	9.97908
pme3285	Afzelechin (3,5,7,4'-Tetrahydroxyflavan)	Flavanone	9	9	9	8290	7120	6820	2.21713	823.333	9.68533
pma0779	Tricin O-rhamnosyl-O-malonylhexoside	Flavone	9	9	9	4080	7910	5130	2.16618	634.074	9.30851
pmf0472	Apiin	Flavonoid	9	9	9	5160	4290	7270	2.16488	619.259	9.2744
pmb0653	di-C,C-hexosyl-apigenin	Flavone	9	9	5990	505000	452000	494000	2.39216	241.511	7.91595
pmf0550	Diosmin	Flavonoid	73700	67100	8520	5220000	6220000	5530000	1.89574	113.649	6.82844
pmb0563	Peonidin	Anthocyanins	164000	92000	99700	2310000	3620000	3100000	1.53648	25.3866	4.66599
pma1116	Kaempferide	Flavonol	163000	68100	95700	2370000	2880000	2170000	1.51605	22.705	4.50494
pmb2979	Hesperetin O-malonylhexoside	Flavanone	111000	104000	85100	2010000	1570000	2060000	1.46335	18.7937	4.23218
pmf0617	Peonidin 3-sophoroside-5-glucoside.	Anthocyanins	5010	3380	3800	79800	63300	59100	1.43184	16.5874	4.05201
pme3392	Pelargonidin 3-O-beta-D-glucoside（Callistephin chloride)	Anthocyanins	5370000	4710000	5960000	81700000	79400000	82200000	1.41175	15.1683	3.92299
pmb0713	Tricin 7-O-hexosyl-O-hexoside	Flavone	158000	111000	134000	1820000	1920000	1750000	1.38365	13.6228	3.76795
pme1793	Pelargonin	Anthocyanins	1660000	1400000	1890000	17700000	17800000	18700000	1.32437	10.9495	3.45279
pmb2992	Acacetin O-glucuronic acid	Flavone	4440	1700	2420	27500	23300	32400	1.29041	9.71963	3.2809
pme1588	Isorhamnetin	Flavonol	5240000	5770000	3210000	24100000	47900000	50900000	1.22775	8.64276	3.11149
pmb0696	8-C-hexosyl chrysoeriol O-hexoside	Flavone	7190000	4340000	6020000	35800000	66200000	47500000	1.23589	8.51852	3.0906
pmb0629	Chrysoeriol 6-C-hexoside	Flavone	11400	11000	15500	112000	99200	108000	1.24905	8.42216	3.07419
pme3401	Syringetin	Flavonol	447000	448000	306000	2010000	3950000	4040000	1.21834	8.32639	3.05769
pme2319	Hesperetin	Flavanone	27400	17100	21900	211000	143000	166000	1.22034	7.83133	2.96926
pma0760	Selgin O-malonylhexoside	Flavone	19900	14800	17500	119000	129000	125000	1.19999	7.14559	2.83705
pme1599	7-O-Methyleriodictyol	Flavanone	359000	149000	186000	1530000	1440000	1780000	1.18648	6.84438	2.77492
pmb3013	Isorhamnetin O-acetyl-hexoside	Flavonol	32700	16900	24900	152000	133000	150000	1.13436	5.83893	2.5457
pme3461	Homoeriodictyol	Flavanone	264000	269000	105000	919000	1440000	1310000	1.11706	5.75078	2.52376
pma1108	Apigenin C-glucoside	Flavone	2040	9	9	2720	3380	4290	1.5068	5.04859	2.33588
pmf0265	5,7-Dihydroxychromone	Flavonoid	17300	6170	8830	53300	45700	58900	1.07221	4.88854	2.28941
pmb0711	Quercetin 7-O-rutinoside	Flavonol	1110000	1380000	1410000	5810000	6370000	5720000	1.05528	4.58974	2.19841
pme0369	Kaempferol 3-O-rutinoside (Nicotiflorin)	Flavonol	391000	358000	378000	1690000	1490000	1830000	1.04237	4.44543	2.15232
pme1580	Eriodictyol	Flavanone	1980000	1120000	1610000	6260000	7130000	7410000	1.03806	4.41614	2.14278
pme1605	Kaempferol 3-O-robinobioside (Biorobin)	Flavonol	367000	402000	375000	1570000	1300000	1760000	1.00502	4.0472	2.01693
pmb0665	Luteolin 8-C-hexosyl-O-hexoside	Flavone	48400	61500	53200	189000	220000	182000	0.967363	3.62354	1.8574
pme3502	Formononetin 7-O-glucoside (Ononin)	Isoflavone	14800	14100	10600	52200	35300	49800	0.938065	3.47595	1.79741
pme3288	3,7-Di-O-methylquercetin	Flavonol	8850	7920	9990	23100	42100	26500	0.916115	3.42676	1.77684
pmb0565	Syringetin 3-O-hexoside	Flavonol	265000	215000	251000	800000	779000	736000	0.91717	3.16689	1.66307
pmf0362	Hydroxygenkwanin	Flavonoid	5660	4240	2310	9090	17400	11700	0.866142	3.12776	1.64513
pmb0663	8-C-hexosyl-luteolin O-hexoside	Flavone	52100	41800	34500	139000	142000	119000	0.905343	3.11526	1.63935
pmf0179	Narcissoside	Flavonoid	2750000	2740000	3100000	9090000	7040000	8990000	0.877756	2.92433	1.54811
pmf0238	Theaflavin-3-gallate	Polyphenol	55000	68500	55700	153000	183000	184000	0.877799	2.90179	1.53694
pmf0240	Theaflavin	Polyphenol	57200	65800	55200	147000	181000	177000	0.867645	2.83389	1.50279
pmb2999	Chrysoeriol 5-O-hexoside	Flavone	51200	79600	79000	199000	191000	198000	0.861211	2.80267	1.4868
pme3369	Rhamnetin (7-O-methxyl quercetin)	Flavonol	40000	53400	40300	83400	175000	116000	0.81205	2.8003	1.48558
pme1568	Orobol (5,7,3',4'-tetrahydroxyisoflavone)	Isoflavone	15900	10700	10700	35000	38500	30700	0.856787	2.79357	1.48211
pma0249	Selgin 5-O-hexoside	Flavone	458000	488000	595000	2110000	1050000	1120000	0.801383	2.77742	1.47374
pme1550	Tangeretin	Flavone	18500	10500	8060	44400	24500	30100	0.798452	2.67134	1.41757
pme3473	Butin	Flavone	1220000	1290000	1230000	3210000	3710000	3070000	0.844286	2.67112	1.41745
pme1624	Isovitexin	Flavone	2950	1560	9	3520	4000	4480	0.996375	2.65545	1.40896
pme1518	Nobiletin	Flavone	28100	19800	16700	73500	43300	54300	0.807069	2.64861	1.40523
pmb3046	Tricin 7-O-hexoside	Flavone	29900	24300	26500	73800	67100	71800	0.839839	2.63569	1.39818
pme2957	Naringenin chalcone	Flavanone	1380000	1230000	1200000	2960000	3790000	3140000	0.827938	2.5958	1.37618
pme0197	Quercetin 3-O-rutinoside (Rutin)	Flavonol	593000	650000	625000	1630000	1460000	1690000	0.826633	2.55889	1.35552
pme0376	Naringenin	Flavanone	819000	742000	750000	1820000	2220000	1820000	0.819316	2.5357	1.34238
pma6496	Luteolin 6-C-glucoside	Flavone	5000	9	9	6090	3480	3010	1.41464	2.50697	1.32595
pme3464	Isosakuranetin (4'-Methylnaringenin)	Flavanone	146000	29400	41900	67100	224000	252000	0.679244	2.49931	1.32153
pmf0458	6-Gingerol	Polyphenol	856000	637000	675000	2320000	1700000	1380000	0.782343	2.49077	1.31659
pmf0027	Cyanidin 3-O-galactoside	Anthocyanins	9470000	7880000	10400000	22300000	22500000	24200000	0.812479	2.48649	1.31411
pmf0392	Persicogenin	Flavonoid	3950	9	1530	1880	5720	6010	0.94923	2.4795	1.31005
pme3276	2'-Hydroxygenistein	Isoflavone	7630	11300	6300	13800	30100	18300	0.736324	2.46532	1.30177
pme0200	Kaempferol	Flavonol	7920000	9710000	5200000	7960000	22800000	24700000	0.644866	2.42926	1.28052
pmb3014	Luteolin O-eudesmic acid-O-hexoside	Flavone	13100	9980	9950	21900	32900	20700	0.741179	2.2858	1.1927
pme0205	Catechin	Polyphenol	935000	639000	610000	1620000	1560000	1770000	0.76176	2.26648	1.18046
pmb2975	Hesperetin O-Glucuronic acid	Flavanone	41600	28300	44500	85900	56500	105000	0.688151	2.16259	1.11276
pme0088	Luteolin	Flavone	98500	79400	64300	140000	213000	169000	0.716956	2.15524	1.10785
pme2954	Quercetin	Flavonol	7470000	8960000	5690000	7120000	17200000	22100000	0.564929	2.09855	1.0694
pme1500	Kumatakenin	Flavonol	31700	40400	25800	73100	83800	47500	0.676718	2.08784	1.06201
pmb2831	Protocatechuic acid O-glucoside	Polyphenol	3820000	3770000	3670000	7920000	8000000	7370000	0.728423	2.06838	1.0485
pmb0660	C-hexosyl-luteolin O-p-coumaroylhexoside	Flavone	8760	5850	7970	16000	17300	13400	0.708476	2.0682	1.04838
pme2949	Hesperetin 7-rutinoside (Hesperidin)	Flavanone	243000	273000	170000	269000	339000	763000	0.541075	1.99854	0.998948
pmb0595	Isorhamnetin 5-O-hexoside	Flavonol	4740000	3760000	4250000	7590000	9440000	8280000	0.696956	1.9851	0.98921
pmf0374	Isorhamnetin 3-O-glucoside	Flavonoid	48500000	35100000	50900000	90500000	82500000	93600000	0.693104	1.98216	0.987071
pmb0647	8-C-hexosyl-luteolin O-pentoside	Flavone	13200	7900	13400	20200	18000	29400	0.641511	1.95942	0.970427
pme1521	Dihydroquercetin (Taxifolin)	Flavonol	441000	400000	418000	829000	787000	821000	0.694162	1.93566	0.952828
pma6639	Isorhamnetin O-hexoside	Flavonol	26000000	21300000	23600000	46000000	47000000	44200000	0.691377	1.93512	0.952423
pmb2850	Tricin	Flavone	93400	74000	63100	111000	159000	169000	0.642881	1.90456	0.929454
pmf0344	(-)-Epiafzelechin	Polyphenol	4010	3790	2540	8000	5390	5840	0.626341	1.85977	0.895123
pmb0732	Tricin 5-O-feruloylhexoside	Flavone	17500	22000	16200	37900	36300	27200	0.630161	1.82047	0.864308
pme1662	sakuranetin	Flavone	6810	6930	4220	13700	6020	12400	0.514748	1.78842	0.838685
pma0253	O-methylChrysoeriol 5-O-hexoside	Flavone	19900	21400	8610	38000	29300	21800	0.563173	1.78521	0.836097
pmf0567	Tectorigenin	Flavonoid	1410	1040	2070	2640	3650	1650	0.521427	1.75664	0.812816
pmf0057	4,2',4',6'-Tetrahydroxychalcone	Flavone	867000	792000	842000	1380000	1570000	1410000	0.633108	1.7433	0.801823
pmb0566	Luteolin O-hexosyl-O-pentoside	Flavone	59400	57600	49600	92800	86200	109000	0.616365	1.72869	0.78968
pmf0058	4',5,7-Trihydroxyflavanone	Flavanone	981000	891000	965000	1530000	1790000	1550000	0.621262	1.7166	0.779556
pme1773	Cyanidin 3-O-rutinoside (Keracyanin)	Anthocyanins	91100	100000	76700	146000	144000	169000	0.612986	1.71397	0.777338
pme3514	Morin	Flavonol	667000	827000	453000	556000	1320000	1360000	0.436077	1.66204	0.732959
pme0001	Hesperetin 7-O-neohesperidoside (Neohesperidin)	Flavanone	226000	450000	176000	278000	307000	816000	0.388658	1.64437	0.717532
pmf0274	Herbacetin	Flavonoid	651000	858000	492000	535000	1290000	1430000	0.403741	1.62669	0.701936
pma6218	O-methylnaringenin C-pentoside	Flavone	17300	20600	15000	28000	39500	18300	0.470312	1.62193	0.69771
pma6638	O-methylChrysoeriol 7-O-hexoside	Flavone	27100	22400	12700	40400	32700	26600	0.509333	1.60289	0.680679
pmb3894	Di-O-methylquercetin	Flavonol	108000	104000	70600	138000	151000	160000	0.549205	1.58882	0.667954
pma6558	Velutin	Flavone	27200	33600	27100	63000	46800	29100	0.447409	1.5802	0.660112
pmf0011	Apigenin 6,8-C-diglucoside	Flavone	2260	1970	1790	3320	2670	3520	0.548384	1.57973	0.659682
pme2898	Dihydromyricetin	Flavonol	872000	1130000	807000	1510000	1260000	1510000	0.523928	1.52367	0.607554
pme2478	Protocatechuic aldehyde	Polyphenol	42800	40700	40100	54500	69200	61100	0.524072	1.49515	0.580286
pme1539	Isorhamnetin 3-O-neohesperidoside	Flavonol	743000	864000	951000	1110000	1140000	1290000	0.461563	1.38389	0.468733
pmf0260	Sinensetin	Flavonoid	934	1490	1080	1540	1710	1460	0.41042	1.34418	0.426724
pmb0602	Syringetin 7-O-hexoside	Flavone	12000000	10500000	11300000	14800000	16300000	14200000	0.447534	1.34024	0.422488
pmb3026	Quercetin O-acetylhexoside	Flavonol	404000	419000	334000	625000	451000	444000	0.370529	1.31374	0.393682
pme0208	Amentoflavone	Flavone	82300	71900	47600	68800	105000	83800	0.314904	1.27651	0.352206
pme0333	Apigenin 7-O-neohesperidoside (Rhoifolin)	Flavone	67700	67500	48700	85100	82100	66600	0.349578	1.27134	0.346353
pmb2983	Chrysoeriol C-pentosyl-O-rhamnosyl-rhamnoside	Flavone	1250	1160	1090	1040	2130	1270	0.239878	1.26857	0.343205
pmb3023	Eriodictyol C-hexoside	Flavone	4540000	4330000	4690000	6070000	4670000	5960000	0.333552	1.23156	0.300491
pme3215	Isoliquiritigenin	Flavanone	3970	4350	3520	4380	5490	4600	0.328512	1.22213	0.289396
pmf0216	Catechin gallate，CG	Polyphenol	419000	353000	302000	424000	440000	432000	0.321909	1.2067	0.271072
pme2493	Kaempferol 3,7-dirhamnoside (Kaempferitrin)	Flavonol	129000	140000	126000	166000	128000	162000	0.248457	1.15443	0.207181
pme2982	Pinocembrin (Dihydrochrysin)	Flavanone	32800	22400	56600	40000	52600	36000	0.21789	1.15027	0.20197
pmb0550	Cyanidin 3-O-glucoside (Kuromanin)	Anthocyanins	179000000	174000000	177000000	196000000	199000000	211000000	0.303484	1.1434	0.193325
pme1824	Protocatechuic acid	Polyphenol	568000	535000	468000	520000	656000	618000	0.238357	1.14195	0.191497
pmf0330	Spinosin	Flavonoid	5460	3450	5580	4400	5850	6150	0.184612	1.13182	0.178638
pma6576	Spinacetin	Flavone	207000	189000	188000	315000	174000	163000	0.0838771	1.11644	0.158904
pmb0645	6-C-hexosyl-hesperetin O-hexoside	Flavone	7210000	7100000	7750000	8920000	8330000	6900000	0.170558	1.09474	0.13059
pmb0576	Apigenin O-malonylhexoside	Flavone	18000	15400	15100	11900	9130	31000	0.0721359	1.07278	0.101359
pmb0592	Chrysoeriol O-hexosyl-O-rutinoside	Flavone	27600	28100	27000	32500	29700	22800	0.0306324	1.02781	0.0395755
pmf0371	Pedalitin	Flavonoid	2480000	2520000	2420000	2100000	2750000	2730000	0.0286276	1.02156	0.0307787
pme0431	Procyanidin A1	Proanthocyanidins	25200	21500	27200	29200	22300	23900	0.0328365	1.0203	0.0289902
pme1510	Baicalein (5,6,7-Trihydroxyflavone)	Flavone	20500	9760	6480	12500	12000	12600	0.129568	1.0098	0.0140676
pme3391	Petunidin 3-O-glucoside	Anthocyanins	4440000	4120000	6800000	5470000	5140000	4850000	0.0459384	1.00651	0.0093621
pmf0233	Tiliroside	Flavonoid	36000000	33900000	34800000	35300000	36400000	33400000	0.0121628	1.00382	0.00550123
pme1562	Epicatechin gallate (ECG)	Polyphenol	14600000	13500000	11600000	13200000	12700000	13200000	0.0252134	0.984887	-0.0219704
pmf0382	5,7-Dihydroxy-3',4',5'-trimethoxyflavone	Flavonoid	6700	4880	9680	9140	4850	6200	0.0558954	0.949671	-0.0745007
pme1478	Myricetin	Flavonol	12400000	14300000	11000000	8680000	15300000	11400000	0.11758	0.938462	-0.0916305
pme2963	Aromadedrin (Dihydrokaempferol)	Flavonol	746000	662000	832000	674000	736000	683000	0.138981	0.934375	-0.0979264
pme2984	Isosakuranetin-7-neohesperidoside (Poncirin)	Flavanone	6410000	6520000	6900000	6140000	6660000	5580000	0.18074	0.926878	-0.109548
pme1201	Phloretin	Flavanone	295000	349000	342000	283000	334000	296000	0.161386	0.925963	-0.110973
pmf0208	Isoquercitroside	Flavonoid	5430000	5430000	5260000	4920000	5030000	4690000	0.25246	0.908189	-0.138936
pme3442	Quercetin 7-O-β-D-Glucuronide	Flavonol	236000	245000	228000	243000	181000	213000	0.213797	0.898449	-0.154492
pme3130	Quercetin 4'-O-glucoside (Spiraeoside)	Flavonol	4770000	4390000	4570000	4260000	4030000	3940000	0.271169	0.89075	-0.166907
pmb0689	Chrysoeriol C-hexoside	Flavone	13800	12800	12200	8910	10300	15300	0.203555	0.889433	-0.169042
pmf0369	Persicoside	Flavonoid	452000	254000	405000	393000	303000	289000	0.134257	0.886589	-0.173663
pmc1990	4'-Hydroxy-5,7-dimethoxyflavanone	Flavanone	2140000	2060000	2100000	1930000	1690000	1880000	0.293329	0.873016	-0.19592
pme2247	Ellagic acid	Polyphenol	261000	248000	288000	284000	165000	233000	0.250529	0.855709	-0.224808
pmf0279	Gossypitrin	Flavonoid	40200000	40000000	40700000	35000000	35100000	32700000	0.338253	0.850289	-0.233974
pmf0204	Hyperoside	Flavonoid	5320000	5280000	5750000	4790000	4680000	4210000	0.34	0.836697	-0.257222
pme3399	Sissotrin	Isoflavone	165000	147000	106000	96600	117000	131000	0.25914	0.824402	-0.27858
pme3407	Laricitrin	Flavonol	567000	536000	451000	359000	476000	446000	0.30838	0.824324	-0.278716
pme1777	Cyanidin 3,5-O-diglucoside (Cyanin)	Anthocyanins	22700000	16900000	25600000	17900000	16400000	19300000	0.277383	0.822086	-0.282639
pme0379	Apigenin	Flavone	49300	41500	29900	30900	38200	29300	0.26169	0.815244	-0.294695
pme2457	Luteolin 7-O-glucoside (Cynaroside)	Flavone	113000	132000	143000	124000	113000	78200	0.306526	0.812371	-0.299789
pme1541	Acacetin	Flavone	101000	43000	57900	44300	47200	71800	0.18897	0.808816	-0.306116
pme3268	Kaempferol 3-O-galactoside (Trifolin)	Flavonol	6840000	7170000	6790000	5210000	6250000	5090000	0.383695	0.795673	-0.329752
pme3292	Prunetin	Isoflavone	92600	41800	57100	44500	38400	69100	0.228269	0.793734	-0.333273
pme0436	Procyanidin B3	Proanthocyanidins	5330000	4650000	4910000	4000000	3590000	4010000	0.409961	0.779046	-0.360219
pmf0302	Engeletin	Flavonoid	1000000	1130000	1050000	825000	787000	845000	0.423581	0.772642	-0.372129
pme1398	Delphinidin 3-O-glucoside (Mirtillin)	Anthocyanins	56000000	45600000	51000000	37400000	37100000	42800000	0.407964	0.768676	-0.379552
pme0363	Chrysoeriol	Flavone	152000	22700	29400	34100	60400	59800	0.0493904	0.756002	-0.403538
pme0434	Procyanidin B2	Proanthocyanidins	5150000	4230000	4820000	3660000	3220000	3840000	0.424253	0.75493	-0.405586
pmb0835	Gallocatechin-gallocatechin	Polyphenol	22000000	16700000	27000000	15300000	14500000	16800000	0.422749	0.709285	-0.495563
pme1598	Hesperetin 5-O-glucoside	Flavanone	3140000	2960000	2720000	2100000	2030000	1980000	0.510105	0.692744	-0.529606
pma6389	Ayanin	Flavonol	11200	11300	11100	6440	9110	7650	0.495947	0.690476	-0.534336
pmb0604	Kaempferol 3-O-glucoside (Astragalin)	Flavonol	11500000	11400000	11200000	7800000	8290000	7450000	0.517821	0.690323	-0.534657
pme3211	Quercetin 3-O-glucoside (Isotrifoliin)	Flavonol	2920000	2850000	2810000	2090000	1830000	1990000	0.517932	0.688811	-0.53782
pme1506	Kaempferol 7-O-rhamnoside	Flavonol	5780000	4950000	5580000	3440000	4050000	3660000	0.512686	0.68363	-0.548713
pme0450	L-Epicatechin	Polyphenol	14700000	13300000	13200000	9250000	8500000	9630000	0.539437	0.664563	-0.589522
pmb0580	Chrysin 5-O-glucoside (Toringin)	Flavone	517000	472000	574000	355000	312000	318000	0.568467	0.630198	-0.666122
pmf0615	Petunidin 3, 5-diglucoside	Anthocyanins	11300000	9970000	10800000	7380000	6460000	6300000	0.57514	0.628001	-0.671161
pmb3006	Apigenin 7-O-glucoside (Cosmosiin)	Flavone	67400	66100	51200	40500	31300	39100	0.581136	0.600433	-0.735925
pmf0583	Phloridzin	Flavonoid	2780000	2800000	2770000	1580000	1630000	1630000	0.631905	0.579641	-0.786769
pme3296	Kaempferol 3-O-rhamnoside (Kaempferin)	Flavonol	27800000	27700000	27800000	16800000	14500000	15100000	0.652471	0.557023	-0.844192
pmb2987	Acacetin O-acetyl hexoside	Flavone	35600	34300	39600	15700	21000	23500	0.642111	0.549772	-0.863095
pmf0115	Galangin	Flavonoid	7790	7150	14000	2120	6890	6840	0.552378	0.547685	-0.868582
pmb3041	Tricin O-saccharic acid	Flavone	1250000	1320000	1090000	682000	582000	649000	0.680448	0.522678	-0.936007
pmb0746	Tricin 4'-O-β-guaiacylglycerol	Flavone	5090	5240	5580	3200	2560	2090	0.706304	0.4934	-1.01917
pmb0724	Tricin O-rhamnoside	Flavone	388000	389000	342000	187000	173000	184000	0.723151	0.486148	-1.04053
pmb0725	Tricin 7-O-feruloylhexoside	Flavone	10900	11200	10300	5900	5770	4030	0.715523	0.484568	-1.04523
pme1535	(+)-Gallocatechin (GC)	Polyphenol	5660000	4870000	4900000	2530000	2290000	2340000	0.745311	0.464031	-1.10771
pmf0109	3-O-Acetylpinobanksin	Flavonoid	124000	40300	124000	26700	74400	24800	0.625211	0.436698	-1.19529
pme0361	Quercetin 3-alpha-L-arabinofuranoside (Avicularin)	Flavonol	25900000	24600000	25300000	9680000	12000000	11300000	0.777707	0.435092	-1.20061
pme1486	Epigallate catechin gallate (EGCG)	Polyphenol	50600000	44500000	44500000	19100000	19400000	21800000	0.780381	0.431948	-1.21107
pma0787	Quercetin-3-(6''-malonyl)-Glucoside	Flavonol	16200	25300	15800	6960	6680	10700	0.74839	0.424782	-1.23521
pmb2947	Catechin-catechin-catechin	Polyphenol	650000	638000	553000	233000	211000	244000	0.845188	0.37371	-1.42001
pmf0379	Gallocatechin gallate	Polyphenol	2620000	2240000	1850000	972000	764000	716000	0.843339	0.365425	-1.45235
pmb3114	Epicatechin-epiafzelechin	Polyphenol	46900	42900	45300	16600	15600	17000	0.859331	0.364175	-1.4573
pmb0588	Luteolin 3',7-di-O-glucoside	Flavone	799000	724000	737000	290000	240000	271000	0.869752	0.354425	-1.49645
pme0324	Chrysin	Flavone	11500	3590	8950	2730	4310	1310	0.752572	0.347338	-1.52559
pme1514	Epigallocatechin (EGC)	Polyphenol	9540000	7760000	7530000	2880000	2470000	2730000	0.900358	0.325413	-1.61966
pmb3047	Tricin 4'-O-(syringyl alcohol) ether 5-O-hexoside	Flavone	97900	93400	88900	27300	27100	34500	0.914688	0.317273	-1.6562
pmf0012	6,8-di-C-glucoside Apigenine	Flavone	27600	25100	20900	7870	7360	7520	0.920427	0.309103	-1.69384
pme1611	Isohemiphloin	Flavone	439000	335000	384000	141000	88000	117000	0.931028	0.298791	-1.74279
pmb3037	Tricin O-malonyl shikimic acid	Flavone	4560	5350	6380	1050	1830	1780	0.941629	0.286065	-1.80558
pmf0246	Orientin	Flavonoid	71900	60800	71000	17700	18500	21500	0.957924	0.28326	-1.8198
pme1552	Myricetin 3-O-rhamnoside (Myricitrin)	Flavonol	6660000	7730000	6970000	1470000	1760000	2230000	0.995695	0.255618	-1.96794
pmb0624	6-C-hexosyl-luteolin O-hexoside	Flavone	60700	59800	76200	17100	15100	14800	1.01875	0.238943	-2.06526
pme3509	7,4'-Dihydroxyflavone	Flavone	42200	50700	60200	16100	6040	14100	1.01093	0.236708	-2.07882
pme0355	Daidzein	Isoflavone	76300	97400	89200	16700	20100	19800	1.0562	0.215291	-2.21564
pmf0361	Astilbin	Flavonoid	1180000	1180000	1070000	186000	260000	268000	1.06998	0.208163	-2.26421
pme3484	Myricetin 3-O-galactoside	Flavonol	28500000	29100000	32400000	5550000	4620000	4420000	1.15362	0.162111	-2.62495
pmb0628	Eriodictiol C-hexosyl-O-hexoside	Flavone	1830000	1780000	1890000	315000	295000	251000	1.1654	0.156545	-2.67535
pmb0618	8-C-hexosyl-hesperetin O-hexoside	Flavone	30500000	33200000	27800000	3940000	4110000	3430000	1.23168	0.125464	-2.99465
pme3303	Tricetin	Flavone	2620000	3470000	2990000	306000	330000	349000	1.27209	0.10848	-3.2045
pmb0739	Tricin O-hexosyl-O-syringin alcohol	Flavone	135000	136000	205000	13600	8020	7980	1.42125	0.0621849	-4.00729
pma6647	C-hexosyl-chrysoeriol O-hexoside	Flavone	15400	16700	11500	9	9	9	2.32401	0.000619266	-10.6572
pme3609	Cyanidin	Anthocyanins	146000	111000	97100	9	9	9	2.63339	7.62496e-05	-13.6789
pme0442	Delphinidin	Anthocyanins	282000	189000	290000	9	9	9	2.73725	3.54796e-05	-14.7826
pme0372	Naringenin 7-O-glucoside (Prunin)	Flavanone	3790000	167000	9	9	9	9	1.96939	6.82334e-06	-17.1611
pmb2957	Cyanidin O-syringic acid	Anthocyanins	23900000	17700000	26200000	9	9	9	3.28437	3.9823e-07	-21.2599
