# Supplementary material for: <span aria-describedby="tippy-17">Transcriptomic and Metabolomic Profiling Provides Insights into Flavonoids Biosynthesis and Flower Coloring in <em>Loropetalum chinense</em> and <em>Loropetalum chinense</em> var. <em>rubrum</em>
Source: Preprints.org preprint supplement (doi:10.20944/preprints202304.0456.v1), 2023-04-18
Supplement: Supplementary file 25 [file supplementary table S30.xlsx]

## Sheet: Table S30  
Supplementary table S30 The KEGG enrichment analysis of DETs between XNNC VS XNXY group
pathway_term	rich_factor	qvalue	gene_number	ID	P-Value	Corrected P-Value	Input	Hyperlink
Plant hormone signal transduction	0.29703	4.57066e-05	390	ko04075	3.71598e-07	4.57066e-05	i3_HQ_LCRFT_c11613/f2p0/2260|i2_LQ_LCRFT_c40359/f1p7/2276|i3_LQ_LCRFT_c56278/f1p0/2150|i3_LQ_LCRFT_c36268/f1p0/2403|i5_HQ_LCRFT_c1169/f3p0/4948|i2_LQ_LCRFT_c95507/f1p7/2810|i0_LQ_LCRFT_c106732/f1p7/785|i2_LQ_LCRFT_c64565/f1p0/2031|i1_LQ_LCRFT_c169159/f1p4/1949|i1_HQ_LCRFT_c205227/f4p1/1105|i4_LQ_LCRFT_c28524/f1p1/3285|i0_LQ_LCRFT_c146976/f1p0/831|i3_LQ_LCRFT_c70481/f1p0/2705|i4_LQ_LCRFT_c12919/f1…	http://www.genome.jp/kegg-bin/show_pathway?ko04075/K14486%09red/K14487%09red/K14484%09red/K14485%09red/K14488%09red/K14489%09red/K13449%09red/K13946%09red/K13416%09red/K14432%09red/K14431%09red/K14510%09red/K14512%09red/K14513%09red/K14514%09red/K14515%09red/K14516%09red/K14495%09red/K14494%09red/K14497%09red/K14496%09red/K14491%09red/K14490%09red/K14493%09red/K14492%09red/K16189%09red/K14498%09r…
Sesquiterpenoid and triterpenoid biosynthesis	0.430464	0.000863127	65	ko00909	1.40346e-05	0.000863127	i2_LQ_LCRFT_c70938/f1p0/2223|i4_LQ_LCRFT_c43854/f1p0/3718|i3_LQ_LCRFT_c110726/f1p0/2386|i1_LQ_LCRFT_c40206/f1p1/1870|i3_LQ_LCRFT_c38917/f1p0/2273|i5_LQ_LCRFT_c5196/f1p0/4551|i1_LQ_LCRFT_c98043/f1p0/1703|i2_LQ_LCRFT_c77153/f1p0/2136|i2_LQ_LCRFT_c38206/f1p1/2177|i5_LQ_LCRFT_c20274/f1p49/4052|i2_LQ_LCRFT_c44301/f1p1/2185|i1_HQ_LCRFT_c60789/f2p8/1873|i1_LQ_LCRFT_c34912/f1p0/1939|i3_LQ_LCRFT_c28501/f1…	http://www.genome.jp/kegg-bin/show_pathway?ko00909/K00511%09red/K14182%09red/K15803%09red/K00801%09red/K15813%09red
Cutin, suberine and wax biosynthesis	0.320548	0.0191945	117	ko00073	0.000468159	0.0191945	i2_LQ_LCRFT_c3188/f1p6/2208|i3_LQ_LCRFT_c25157/f1p0/2621|i3_LQ_LCRFT_c8642/f1p10/2556|i1_LQ_LCRFT_c42813/f1p0/1868|i3_LQ_LCRFT_c79814/f1p0/2603|i2_LQ_LCRFT_c98053/f1p0/2404|i1_LQ_LCRFT_c41275/f1p0/1447|i1_LQ_LCRFT_c94220/f1p1/1834|i1_LQ_LCRFT_c96482/f1p5/1604|i2_LQ_LCRFT_c35461/f1p3/2870|i1_LQ_LCRFT_c194887/f1p2/1350|i1_LQ_LCRFT_c38778/f1p8/1869|i1_LQ_LCRFT_c193917/f1p5/1930|i2_LQ_LCRFT_c12248/f1…	http://www.genome.jp/kegg-bin/show_pathway?ko00073/K17991%09red/K13356%09red/K13407%09red/K15404%09red/K15400%09red/K15398%09red
Pyruvate metabolism	0.275696	0.0227318	287	ko00620	0.000739245	0.0227318	i1_HQ_LCRFT_c208974/f3p5/1769|i1_HQ_LCRFT_c21003/f3p3/1644|i3_LQ_LCRFT_c23732/f1p0/2154|i5_LQ_LCRFT_c19900/f1p0/4086|i3_LQ_LCRFT_c24819/f1p0/2322|i1_LQ_LCRFT_c52996/f1p0/1600|i4_LQ_LCRFT_c72881/f1p0/3080|i2_LQ_LCRFT_c103533/f1p0/2080|i1_HQ_LCRFT_c116186/f2p0/1240|i5_LQ_LCRFT_c4107/f1p1/4275|i2_HQ_LCRFT_c67057/f5p0/2213|i2_LQ_LCRFT_c27937/f1p0/2219|i1_LQ_LCRFT_c50569/f2p4/1835|i2_LQ_LCRFT_c23723/f…	http://www.genome.jp/kegg-bin/show_pathway?ko00620/K01961%09red/K01649%09red/K14085%09red/K00873%09red/K11262%09red/K00627%09red/K00626%09red/K00051%09red/K01895%09red/K00016%09red/K01069%09red/K01006%09red/K01679%09red/K01512%09red/K01759%09red/K01595%09red/K01963%09red/K01610%09red/K02160%09red/K01638%09red/K00161%09red/K00162%09red/K00128%09red/K00029%09red/K00028%09red/K00382%09red/K00025%09r…
Tyrosine metabolism	0.318352	0.0725341	85	ko00350	0.00294854	0.0725341	i1_LQ_LCRFT_c165098/f1p9/1889|i3_LQ_LCRFT_c78110/f1p0/2489|i1_HQ_LCRFT_c21072/f3p4/1719|i4_LQ_LCRFT_c38159/f1p0/3438|i3_LQ_LCRFT_c36243/f1p0/2784|i1_HQ_LCRFT_c27533/f4p1/1456|i4_LQ_LCRFT_c10941/f1p0/3116|i2_HQ_LCRFT_c109284/f3p0/2827|i1_LQ_LCRFT_c57504/f1p7/1669|i2_LQ_LCRFT_c77849/f1p3/2291|i0_LQ_LCRFT_c201452/f1p0/507|i2_LQ_LCRFT_c59216/f1p0/2110|i2_LQ_LCRFT_c21640/f1p0/2250|i4_HQ_LCRFT_c34707/f…	http://www.genome.jp/kegg-bin/show_pathway?ko00350/K00276%09red/K14455%09red/K14454%09red/K00001%09red/K00451%09red/K01800%09red/K00817%09red/K15849%09red/K18857%09red/K00811%09red/K01592%09red/K00815%09red/K01555%09red/K07253%09red/K00121%09red/K00457%09red/K00422%09red/K01557%09red
Circadian rhythm - plant	0.289641	0.0850922	137	ko04712	0.00415084	0.0850922	i4_HQ_LCRFT_c18368/f5p1/3390|i2_LQ_LCRFT_c78535/f1p0/2744|i1_LQ_LCRFT_c12738/f1p0/1429|i1_LQ_LCRFT_c19587/f1p2/1363|i5_LQ_LCRFT_c20131/f1p0/4401|i2_LQ_LCRFT_c78492/f1p26/2894|i5_LQ_LCRFT_c13366/f1p0/4891|i2_HQ_LCRFT_c4980/f2p0/2804|i3_LQ_LCRFT_c55506/f1p0/2461|i3_LQ_LCRFT_c73935/f4p0/2562|i2_LQ_LCRFT_c28639/f1p21/2607|i1_LQ_LCRFT_c8520/f1p6/1569|i2_HQ_LCRFT_c39325/f2p8/2594|i4_HQ_LCRFT_c50222/f8p…	http://www.genome.jp/kegg-bin/show_pathway?ko04712/K10143%09red/K16241%09red/K12118%09red/K12119%09red/K12133%09red/K03097%09red/K00660%09red/K12116%09red/K16166%09red/K12115%09red/K12120%09red/K12130%09red/K12126%09red/K12125%09red/K12124%09red/K12127%09red/K12129%09red/K16240%09red/K03115%09red
Synthesis and degradation of ketone bodies	0.423729	0.115992	25	ko00072	0.00660115	0.115992	i2_LQ_LCRFT_c14881/f1p0/2218|i1_LQ_LCRFT_c120448/f1p4/1862|i2_LQ_LCRFT_c9075/f1p2/2339|i1_HQ_LCRFT_c71373/f2p3/1917|i5_LQ_LCRFT_c14497/f1p1/4530|i1_HQ_LCRFT_c204622/f3p7/1588|i3_LQ_LCRFT_c97629/f1p15/2896|i4_LQ_LCRFT_c14768/f1p0/3763|i1_LQ_LCRFT_c70267/f1p3/1883|i2_LQ_LCRFT_c54193/f1p0/2180|i1_HQ_LCRFT_c27645/f2p5/1594|i5_LQ_LCRFT_c3162/f1p4/4713|i1_LQ_LCRFT_c169503/f1p5/1449|i1_LQ_LCRFT_c166265/…	http://www.genome.jp/kegg-bin/show_pathway?ko00072/K01640%09red/K01641%09red/K00626%09red
Plant-pathogen interaction	0.259808	0.125255	298	ko04626	0.00885936	0.125255	i3_HQ_LCRFT_c123546/f4p0/2497|i2_LQ_LCRFT_c110157/f1p0/2644|i4_HQ_LCRFT_c71746/f2p0/3374|i2_LQ_LCRFT_c6875/f1p0/2405|i3_LQ_LCRFT_c84667/f1p8/2074|i4_HQ_LCRFT_c86183/f6p0/3225|i1_LQ_LCRFT_c98353/f1p2/1364|i3_LQ_LCRFT_c56774/f1p1/2437|i1_LQ_LCRFT_c98308/f1p12/1591|i2_LQ_LCRFT_c40350/f1p0/2507|i1_LQ_LCRFT_c222111/f1p3/1066|i0_LQ_LCRFT_c24068/f1p21/553|i6_LQ_LCRFT_c2658/f1p0/5948|i2_LQ_LCRFT_c110175/…	http://www.genome.jp/kegg-bin/show_pathway?ko04626/K18835%09red/K18834%09red/K12795%09red/K13414%09red/K13416%09red/K09487%09red/K13412%09red/K13413%09red/K13456%09red/K13457%09red/K13459%09red/K13430%09red/K13436%09red/K02183%09red/K13449%09red/K13448%09red/K05391%09red/K13429%09red/K04368%09red/K18875%09red/K04079%09red/K13447%09red/K13420%09red/K13425%09red/K13424%09red/K13427%09red
Isoquinoline alkaloid biosynthesis	0.333333	0.125255	51	ko00950	0.00916496	0.125255	i1_HQ_LCRFT_c14934/f8p2/1591|i1_HQ_LCRFT_c19627/f2p0/1948|i4_LQ_LCRFT_c38159/f1p0/3438|i2_LQ_LCRFT_c21640/f1p0/2250|i3_LQ_LCRFT_c36243/f1p0/2784|i4_LQ_LCRFT_c10941/f1p0/3116|i2_HQ_LCRFT_c109284/f3p0/2827|i2_LQ_LCRFT_c77849/f1p3/2291|i1_LQ_LCRFT_c3840/f1p0/1344|i1_HQ_LCRFT_c22586/f3p0/1645|i2_LQ_LCRFT_c18054/f6p0/2152|i1_LQ_LCRFT_c12763/f1p1/1491|i3_LQ_LCRFT_c38657/f1p0/2926|i3_LQ_LCRFT_c26951/f1p…	http://www.genome.jp/kegg-bin/show_pathway?ko00950/K00276%09red/K14455%09red/K14454%09red/K15849%09red/K13384%09red/K00811%09red/K13397%09red/K00815%09red/K01592%09red/K00422%09red
Fatty acid biosynthesis	0.288828	0.134923	106	ko00061	0.0111495	0.134923	i2_LQ_LCRFT_c96421/f1p0/2866|i7_LQ_LCRFT_c521/f1p0/6286|i4_LQ_LCRFT_c20227/f1p6/3895|i5_LQ_LCRFT_c4107/f1p1/4275|i2_LQ_LCRFT_c80163/f1p0/2244|i2_HQ_LCRFT_c119630/f5p0/2507|i3_LQ_LCRFT_c103647/f1p0/2062|i3_LQ_LCRFT_c37064/f1p0/2234|i4_LQ_LCRFT_c3823/f1p5/3225|i1_HQ_LCRFT_c89121/f2p3/1934|i5_LQ_LCRFT_c4878/f1p0/4241|i4_LQ_LCRFT_c20559/f1p3/3088|i1_LQ_LCRFT_c72990/f1p0/1574|i1_HQ_LCRFT_c22544/f5p5/1…	http://www.genome.jp/kegg-bin/show_pathway?ko00061/K10781%09red/K02372%09red/K10782%09red/K00648%09red/K00665%09red/K00059%09red/K01961%09red/K01963%09red/K01962%09red/K02160%09red/K01897%09red/K11262%09red/K03921%09red/K00208%09red/K09458%09red
Glutathione metabolism	0.273043	0.134923	157	ko00480	0.0131742	0.134923	i1_LQ_LCRFT_c3428/f1p3/1333|i3_LQ_LCRFT_c41364/f1p3/2336|i2_LQ_LCRFT_c26964/f1p4/2765|i0_HQ_LCRFT_c157175/f2p0/960|i1_LQ_LCRFT_c205505/f84p11/1227|i2_LQ_LCRFT_c109948/f1p0/2425|i1_LQ_LCRFT_c54195/f1p3/1320|i1_LQ_LCRFT_c161726/f1p14/1339|i0_LQ_LCRFT_c317851/f3p0/904|i1_LQ_LCRFT_c117129/f1p0/1131|i0_LQ_LCRFT_c356851/f1p0/623|i1_LQ_LCRFT_c16672/f1p10/1061|i1_LQ_LCRFT_c76480/f1p1/1930|i0_HQ_LCRFT_c39…	http://www.genome.jp/kegg-bin/show_pathway?ko00480/K01919%09red/K01255%09red/K01256%09red/K18592%09red/K00797%09red/K00432%09red/K00799%09red/K00383%09red/K00036%09red/K01469%09red/K00033%09red/K00434%09red/K00031%09red
Carotenoid biosynthesis	0.312821	0.134923	61	ko00906	0.0136998	0.134923	i1_HQ_LCRFT_c57254/f2p1/1302|i3_LQ_LCRFT_c98363/f1p1/2798|i2_LQ_LCRFT_c44512/f1p0/2482|i3_LQ_LCRFT_c13506/f1p0/2391|i1_HQ_LCRFT_c20294/f3p1/1475|i1_HQ_LCRFT_c148733/f2p1/1099|i5_LQ_LCRFT_c3172/f1p19/4620|i1_LQ_LCRFT_c120250/f1p0/1597|i4_LQ_LCRFT_c38568/f1p0/3199|i1_HQ_LCRFT_c18440/f12p2/1630|i5_LQ_LCRFT_c21637/f1p9/4433|i3_LQ_LCRFT_c15920/f1p2/2061|i3_HQ_LCRFT_c108390/f5p0/2434|i1_LQ_LCRFT_c13791…	http://www.genome.jp/kegg-bin/show_pathway?ko00906/K09840%09red/K14595%09red/K09842%09red/K09843%09red/K02291%09red/K02293%09red/K00514%09red/K09835%09red/K09837%09red/K15746%09red/K06443%09red/K09839%09red/K09838%09red
Fatty acid elongation	0.319527	0.134923	54	ko00062	0.0142602	0.134923	i2_HQ_LCRFT_c63474/f2p0/2163|i3_LQ_LCRFT_c126624/f1p0/2010|i5_LQ_LCRFT_c14956/f1p2/4798|i2_LQ_LCRFT_c6503/f1p1/2687|i1_HQ_LCRFT_c19733/f5p0/1962|i1_LQ_LCRFT_c94807/f1p12/1670|i3_HQ_LCRFT_c67587/f5p0/2663|i1_LQ_LCRFT_c142453/f1p13/1997|i3_LQ_LCRFT_c37432/f1p2/2769|i1_LQ_LCRFT_c203778/f1p1/1062|i2_HQ_LCRFT_c4818/f4p0/2917|i1_LQ_LCRFT_c118235/f1p6/1461|i3_LQ_LCRFT_c42479/f1p0/2194|i1_LQ_LCRFT_c20322…	http://www.genome.jp/kegg-bin/show_pathway?ko00062/K01068%09red/K10703%09red/K01074%09red/K15397%09red/K10258%09red/K10251%09red
Monoterpenoid biosynthesis	0.382353	0.135465	26	ko00902	0.0154187	0.135465	i4_LQ_LCRFT_c80937/f1p0/3424|i4_LQ_LCRFT_c77571/f1p2/3729|i4_LQ_LCRFT_c72996/f1p1/3939|i5_LQ_LCRFT_c5291/f1p0/4313|i1_LQ_LCRFT_c98359/f1p0/1807|i1_LQ_LCRFT_c170706/f1p2/1946|i1_HQ_LCRFT_c131456/f2p5/1236|i4_LQ_LCRFT_c45680/f1p0/3289|i2_HQ_LCRFT_c11745/f3p0/2145|i1_LQ_LCRFT_c115956/f1p4/1148|i4_HQ_LCRFT_c26281/f3p0/3291|i5_LQ_LCRFT_c12367/f1p5/4070|i4_HQ_LCRFT_c71629/f2p0/3099|i1_HQ_LCRFT_c183160/…	http://www.genome.jp/kegg-bin/show_pathway?ko00902/K15086%09red/K18108%09red/K15095%09red
beta-Alanine metabolism	0.274262	0.163734	130	ko00410	0.0199676	0.163734	i4_LQ_LCRFT_c4215/f1p2/3846|i2_HQ_LCRFT_c109284/f3p0/2827|i4_LQ_LCRFT_c58482/f1p0/3060|i3_LQ_LCRFT_c24819/f1p0/2322|i1_HQ_LCRFT_c157759/f9p1/2004|i1_HQ_LCRFT_c156354/f16p1/1588|i1_LQ_LCRFT_c52996/f1p0/1600|i4_LQ_LCRFT_c90205/f1p0/3055|i2_LQ_LCRFT_c103533/f1p0/2080|i2_LQ_LCRFT_c27937/f1p0/2219|i3_LQ_LCRFT_c56561/f1p3/2549|i3_LQ_LCRFT_c53746/f1p1/2935|i1_HQ_LCRFT_c59092/f3p11/1953|i4_LQ_LCRFT_c5735…	http://www.genome.jp/kegg-bin/show_pathway?ko00410/K00249%09red/K00140%09red/K17839%09red/K12259%09red/K05605%09red/K00207%09red/K00276%09red/K00128%09red/K00797%09red/K01464%09red/K01578%09red/K01580%09red/K14085%09red/K13366%09red/K01431%09red/K01918%09red
Histidine metabolism	0.285714	0.169611	90	ko00340	0.0220632	0.169611	i4_LQ_LCRFT_c7428/f1p0/3212|i4_LQ_LCRFT_c4215/f1p2/3846|i3_LQ_LCRFT_c24819/f1p0/2322|i1_LQ_LCRFT_c52996/f1p0/1600|i4_LQ_LCRFT_c72881/f1p0/3080|i2_LQ_LCRFT_c103533/f1p0/2080|i1_HQ_LCRFT_c87128/f23p1/1785|i2_LQ_LCRFT_c27937/f1p0/2219|i1_LQ_LCRFT_c142275/f1p1/1166|i3_HQ_LCRFT_c44512/f2p0/2585|i2_LQ_LCRFT_c92904/f1p33/2940|i5_LQ_LCRFT_c19431/f1p0/4714|i4_LQ_LCRFT_c61219/f1p0/3816|i1_HQ_LCRFT_c41608/f…	http://www.genome.jp/kegg-bin/show_pathway?ko00340/K00817%09red/K11755%09red/K14085%09red/K01693%09red/K00128%09red/K01590%09red/K00765%09red/K00013%09red
Butanoate metabolism	0.327586	0.192608	38	ko00650	0.0266207	0.192608	i1_HQ_LCRFT_c205633/f5p1/1575|i2_LQ_LCRFT_c14881/f1p0/2218|i1_LQ_LCRFT_c120448/f1p4/1862|i2_LQ_LCRFT_c9075/f1p2/2339|i1_LQ_LCRFT_c167180/f1p8/1961|i1_LQ_LCRFT_c89478/f1p5/1610|i1_HQ_LCRFT_c71373/f2p3/1917|i1_HQ_LCRFT_c2439/f3p0/1653|i5_LQ_LCRFT_c14497/f1p1/4530|i1_HQ_LCRFT_c204622/f3p7/1588|i1_LQ_LCRFT_c89260/f1p4/2374|i3_LQ_LCRFT_c97629/f1p15/2896|i4_LQ_LCRFT_c14768/f1p0/3763|i1_LQ_LCRFT_c3953/f…	http://www.genome.jp/kegg-bin/show_pathway?ko00650/K17761%09red/K16871%09red/K18121%09red/K01580%09red/K01640%09red/K01641%09red/K01653%09red/K00626%09red
Valine, leucine and isoleucine degradation	0.265957	0.197356	150	ko00280	0.0288814	0.197356	i4_LQ_LCRFT_c4215/f1p2/3846|i2_LQ_LCRFT_c14881/f1p0/2218|i4_LQ_LCRFT_c58482/f1p0/3060|i3_LQ_LCRFT_c24819/f1p0/2322|i1_LQ_LCRFT_c52996/f1p0/1600|i3_HQ_LCRFT_c2327/f9p0/2613|i4_LQ_LCRFT_c90205/f1p0/3055|i2_LQ_LCRFT_c103533/f1p0/2080|i5_LQ_LCRFT_c14497/f1p1/4530|i2_LQ_LCRFT_c27937/f1p0/2219|i2_LQ_LCRFT_c59843/f1p0/2643|i3_LQ_LCRFT_c56561/f1p3/2549|i2_LQ_LCRFT_c42247/f1p0/2380|i3_LQ_LCRFT_c23154/f1p0…	http://www.genome.jp/kegg-bin/show_pathway?ko00280/K00249%09red/K00140%09red/K07513%09red/K05607%09red/K05605%09red/K00166%09red/K18660%09red/K00128%09red/K00827%09red/K00826%09red/K00382%09red/K14085%09red/K00253%09red/K01640%09red/K01641%09red/K09699%09red/K00626%09red/K01969%09red/K01968%09red
Glycolysis / Gluconeogenesis	0.251989	0.198705	285	ko00010	0.0306942	0.198705	i1_HQ_LCRFT_c208974/f3p5/1769|i3_LQ_LCRFT_c30156/f1p0/2026|i3_LQ_LCRFT_c23732/f1p0/2154|i1_LQ_LCRFT_c168271/f1p2/1901|i3_HQ_LCRFT_c63499/f2p0/2047|i3_LQ_LCRFT_c106751/f1p0/2021|i1_LQ_LCRFT_c179427/f1p3/1096|i3_LQ_LCRFT_c24819/f1p0/2322|i1_LQ_LCRFT_c52996/f1p0/1600|i3_LQ_LCRFT_c90840/f1p0/2655|i3_LQ_LCRFT_c75046/f1p0/2572|i2_LQ_LCRFT_c103533/f1p0/2080|i1_HQ_LCRFT_c116186/f2p0/1240|i4_LQ_LCRFT_c115…	http://www.genome.jp/kegg-bin/show_pathway?ko00010/K00850%09red/K01689%09red/K14085%09red/K00895%09red/K18857%09red/K01623%09red/K01810%09red/K00873%09red/K00627%09red/K00134%09red/K00131%09red/K01835%09red/K01834%09red/K01895%09red/K00016%09red/K00844%09red/K01792%09red/K03841%09red/K01610%09red/K00927%09red/K00001%09red/K01803%09red/K00161%09red/K00162%09red/K00128%09red/K01785%09red/K01568%09r…
Tryptophan metabolism	0.272727	0.246606	99	ko00380	0.041545	0.246606	i4_LQ_LCRFT_c4215/f1p2/3846|i3_LQ_LCRFT_c24819/f1p0/2322|i1_LQ_LCRFT_c52996/f1p0/1600|i4_LQ_LCRFT_c72881/f1p0/3080|i2_LQ_LCRFT_c103533/f1p0/2080|i2_LQ_LCRFT_c27937/f1p0/2219|i3_LQ_LCRFT_c78930/f1p10/2461|i4_LQ_LCRFT_c57359/f1p3/3647|i2_LQ_LCRFT_c92904/f1p33/2940|i2_LQ_LCRFT_c5044/f1p0/2609|i1_HQ_LCRFT_c206736/f6p3/1308|i1_LQ_LCRFT_c38737/f1p6/1899|i4_LQ_LCRFT_c61219/f1p0/3816|i1_LQ_LCRFT_c89478/f…	http://www.genome.jp/kegg-bin/show_pathway?ko00380/K03781%09red/K00128%09red/K16903%09red/K00164%09red/K11816%09red/K14085%09red/K01426%09red/K00626%09red/K11820%09red
