# Supplementary material for: <span aria-describedby="tippy-17">Transcriptomic and Metabolomic Profiling Provides Insights into Flavonoids Biosynthesis and Flower Coloring in <em>Loropetalum chinense</em> and <em>Loropetalum chinense</em> var. <em>rubrum</em>
Source: Preprints.org preprint supplement (doi:10.20944/preprints202304.0456.v1), 2023-04-18
Supplement: Supplementary file 26 [file supplementary table S31.xlsx]

## Sheet: Table S31 
Supplementary table S31 The KEGG enrichment analysis of DETs between XNFJ VS LDPF group
pathway_term	rich_factor	qvalue	gene_number	ID	P-Value	Corrected P-Value	Input	Hyperlink
Plant-pathogen interaction	0.253705	0.000534683	291	ko04626	4.34702e-06	0.000534683	i3_HQ_LCRFT_c123546/f4p0/2497|i4_LQ_LCRFT_c15069/f1p0/3441|i4_HQ_LCRFT_c71746/f2p0/3374|i4_LQ_LCRFT_c22263/f1p0/3585|i5_LQ_LCRFT_c10484/f1p0/4120|i3_LQ_LCRFT_c28424/f1p20/2320|i3_LQ_LCRFT_c60768/f1p0/2837|i2_LQ_LCRFT_c40350/f1p0/2507|i1_LQ_LCRFT_c222111/f1p3/1066|i5_LQ_LCRFT_c3496/f1p1/4960|i4_LQ_LCRFT_c74615/f1p1/3522|i4_LQ_LCRFT_c54267/f1p8/3576|i4_LQ_LCRFT_c82635/f1p0/3055|i3_LQ_LCRFT_c113235/…	http://www.genome.jp/kegg-bin/show_pathway?ko04626/K18835%09red/K18834%09red/K12795%09red/K13414%09red/K13416%09red/K09487%09red/K13412%09red/K13413%09red/K13456%09red/K13457%09red/K13459%09red/K13430%09red/K13434%09red/K02183%09red/K13448%09red/K05391%09red/K00864%09red/K13429%09red/K13428%09red/K04368%09red/K04079%09red/K13447%09red/K13420%09red/K13425%09red/K13424%09red/K13427%09red
Phenylalanine, tyrosine and tryptophan biosynthesis	0.266839	0.0590551	103	ko00400	0.00130316	0.0590551	i5_LQ_LCRFT_c11595/f1p0/4237|i4_LQ_LCRFT_c10941/f1p0/3116|i4_HQ_LCRFT_c50821/f19p0/3153|i4_HQ_LCRFT_c24055/f2p4/3492|i2_HQ_LCRFT_c38897/f2p0/2176|i1_HQ_LCRFT_c58461/f2p1/1371|i1_LQ_LCRFT_c171518/f1p1/1469|i2_HQ_LCRFT_c43173/f2p0/2581|i1_LQ_LCRFT_c36907/f1p5/1793|i4_HQ_LCRFT_c82740/f3p0/3035|i4_HQ_LCRFT_c45434/f4p0/3326|i3_LQ_LCRFT_c54276/f1p0/2929|i2_HQ_LCRFT_c7771/f2p12/2895|i4_LQ_LCRFT_c4499/f1…	http://www.genome.jp/kegg-bin/show_pathway?ko00400/K01817%09red/K14455%09red/K14454%09red/K01658%09red/K00891%09red/K01696%09red/K15849%09red/K15227%09red/K01736%09red/K00811%09red/K13832%09red/K00815%09red/K01626%09red/K00817%09red/K00766%09red/K01850%09red/K05359%09red/K01657%09red/K00800%09red
Tropane, piperidine and pyridine alkaloid biosynthesis	0.3	0.0590551	60	ko00960	0.00144037	0.0590551	i1_HQ_LCRFT_c171682/f3p5/1824|i1_HQ_LCRFT_c14934/f8p2/1591|i2_LQ_LCRFT_c74414/f1p3/2186|i3_LQ_LCRFT_c71717/f1p0/2261|i1_LQ_LCRFT_c171518/f1p1/1469|i2_HQ_LCRFT_c109284/f3p0/2827|i2_HQ_LCRFT_c2266/f7p0/2905|i4_LQ_LCRFT_c10941/f1p0/3116|i2_LQ_LCRFT_c21640/f1p0/2250|i3_LQ_LCRFT_c86151/f1p6/2023|i2_LQ_LCRFT_c24610/f1p0/2497|i3_HQ_LCRFT_c26239/f5p4/2836|i5_LQ_LCRFT_c3584/f1p5/4137|i3_HQ_LCRFT_c45772/f2…	http://www.genome.jp/kegg-bin/show_pathway?ko00960/K00276%09red/K14455%09red/K14454%09red/K15849%09red/K00811%09red/K00815%09red/K08081%09red/K00817%09red
Carotenoid biosynthesis	0.292308	0.0915081	57	ko00906	0.00297587	0.0915081	i1_HQ_LCRFT_c57254/f2p1/1302|i2_LQ_LCRFT_c8691/f1p0/2562|i2_LQ_LCRFT_c40467/f1p0/2622|i2_LQ_LCRFT_c64134/f1p0/2037|i0_LQ_LCRFT_c202968/f1p0/990|i2_LQ_LCRFT_c44512/f1p0/2482|i3_LQ_LCRFT_c71163/f1p0/2661|i3_LQ_LCRFT_c13506/f1p0/2391|i5_LQ_LCRFT_c12648/f1p10/4102|i1_HQ_LCRFT_c1849/f14p3/1732|i1_HQ_LCRFT_c93503/f2p8/1256|i4_LQ_LCRFT_c59568/f1p0/3748|i2_LQ_LCRFT_c95574/f1p0/2296|i3_HQ_LCRFT_c120121/f1…	http://www.genome.jp/kegg-bin/show_pathway?ko00906/K09842%09red/K09840%09red/K15747%09red/K15744%09red/K09843%09red/K17911%09red/K02291%09red/K02293%09red/K06444%09red/K09838%09red/K15746%09red/K09839%09red/K00514%09red/K09841%09red
Monoterpenoid biosynthesis	0.367647	0.110651	25	ko00902	0.004498	0.110651	i4_LQ_LCRFT_c77571/f1p2/3729|i4_LQ_LCRFT_c72996/f1p1/3939|i5_LQ_LCRFT_c5291/f1p0/4313|i4_LQ_LCRFT_c45843/f1p0/3726|i1_LQ_LCRFT_c170706/f1p2/1946|i1_LQ_LCRFT_c179246/f1p3/1061|i1_LQ_LCRFT_c163126/f1p0/1177|i2_HQ_LCRFT_c11745/f3p0/2145|i4_HQ_LCRFT_c26281/f3p0/3291|i4_HQ_LCRFT_c71629/f2p0/3099|i1_HQ_LCRFT_c183160/f3p5/1225|i1_HQ_LCRFT_c131456/f2p5/1236|i3_LQ_LCRFT_c78004/f1p3/2430|i2_HQ_LCRFT_c12969…	http://www.genome.jp/kegg-bin/show_pathway?ko00902/K15086%09red/K18108%09red/K15095%09red
Plant hormone signal transduction	0.220868	0.152717	290	ko04075	0.00744963	0.152717	i1_LQ_LCRFT_c117630/f1p41/1920|i5_LQ_LCRFT_c9967/f1p0/4369|i2_LQ_LCRFT_c40359/f1p7/2276|i2_LQ_LCRFT_c39976/f1p0/2794|i1_LQ_LCRFT_c161827/f1p2/1662|i1_LQ_LCRFT_c75114/f1p5/1732|i2_HQ_LCRFT_c18109/f7p19/2156|i1_LQ_LCRFT_c142866/f1p0/1869|i0_LQ_LCRFT_c336593/f1p0/958|i4_LQ_LCRFT_c40179/f1p0/3262|i2_HQ_LCRFT_c69952/f2p0/2344|i0_LQ_LCRFT_c321542/f1p0/798|i2_LQ_LCRFT_c39958/f1p2/2511|i4_LQ_LCRFT_c20729…	http://www.genome.jp/kegg-bin/show_pathway?ko04075/K14486%09red/K14487%09red/K14484%09red/K14485%09red/K14488%09red/K14489%09red/K13946%09red/K13415%09red/K13416%09red/K14432%09red/K14431%09red/K14510%09red/K14512%09red/K14514%09red/K14515%09red/K14516%09red/K14495%09red/K14494%09red/K14497%09red/K14496%09red/K14491%09red/K14490%09red/K14493%09red/K14492%09red/K14499%09red/K16189%09red/K14498%09r…
Photosynthesis - antenna proteins	0.3	0.154263	39	ko00196	0.00877917	0.154263	i0_LQ_LCRFT_c254371/f2p0/1013|i1_LQ_LCRFT_c166226/f1p111/1284|i1_LQ_LCRFT_c164810/f1p10/1588|i1_LQ_LCRFT_c60462/f1p8/1223|i1_LQ_LCRFT_c113922/f1p12/1403|i1_LQ_LCRFT_c94057/f1p0/1145|i2_LQ_LCRFT_c22903/f1p0/2216|i0_HQ_LCRFT_c243752/f2p0/746|i0_LQ_LCRFT_c13337/f1p1/804|i1_HQ_LCRFT_c158171/f59p8/1259|i1_HQ_LCRFT_c184795/f91p12/1172|i1_LQ_LCRFT_c171149/f1p7/1207|i0_HQ_LCRFT_c67209/f3p0/1011|i1_LQ_LCR…	http://www.genome.jp/kegg-bin/show_pathway?ko00196/K08908%09red/K08907%09red/K08915%09red/K08914%09red/K08917%09red/K08916%09red/K08911%09red/K08910%09red/K08912%09red
Glutathione metabolism	0.231304	0.293401	133	ko00480	0.019083	0.293401	i1_LQ_LCRFT_c3428/f1p3/1333|i0_LQ_LCRFT_c183007/f1p1/766|i1_HQ_LCRFT_c13901/f3p3/1546|i3_LQ_LCRFT_c41364/f1p3/2336|i1_LQ_LCRFT_c59702/f1p1/2008|i0_HQ_LCRFT_c157175/f2p0/960|i3_LQ_LCRFT_c19169/f1p8/2591|i1_LQ_LCRFT_c205505/f84p11/1227|i2_LQ_LCRFT_c27302/f1p0/2130|i1_LQ_LCRFT_c76480/f1p1/1930|i2_LQ_LCRFT_c77060/f1p19/2112|i1_LQ_LCRFT_c144418/f1p8/1742|i1_LQ_LCRFT_c27662/f1p3/1792|i1_LQ_LCRFT_c15875…	http://www.genome.jp/kegg-bin/show_pathway?ko00480/K01255%09red/K01256%09red/K00797%09red/K00036%09red/K00799%09red/K00383%09red/K00432%09red/K00033%09red/K00434%09red/K00031%09red
Tyrosine metabolism	0.250936	0.313245	67	ko00350	0.0229204	0.313245	i1_HQ_LCRFT_c171682/f3p5/1824|i1_HQ_LCRFT_c14934/f8p2/1591|i2_LQ_LCRFT_c74414/f1p3/2186|i3_LQ_LCRFT_c71717/f1p0/2261|i1_LQ_LCRFT_c165098/f1p9/1889|i2_LQ_LCRFT_c21640/f1p0/2250|i1_HQ_LCRFT_c185066/f70p13/1870|i4_LQ_LCRFT_c10941/f1p0/3116|i2_HQ_LCRFT_c109284/f3p0/2827|i1_LQ_LCRFT_c140681/f1p9/1371|i4_LQ_LCRFT_c84889/f1p0/3022|i2_LQ_LCRFT_c24610/f1p0/2497|i3_HQ_LCRFT_c26239/f5p4/2836|i1_LQ_LCRFT_c17…	http://www.genome.jp/kegg-bin/show_pathway?ko00350/K01555%09red/K00276%09red/K14455%09red/K14454%09red/K00451%09red/K01800%09red/K00817%09red/K15849%09red/K18857%09red/K00811%09red/K01557%09red/K00457%09red/K07253%09red/K00121%09red/K00815%09red
Pentose and glucuronate interconversions	0.230461	0.363711	115	ko00040	0.02957	0.363711	i1_HQ_LCRFT_c1965/f5p3/1847|i2_HQ_LCRFT_c107147/f5p0/2239|i1_HQ_LCRFT_c206799/f3p0/1894|i2_LQ_LCRFT_c103533/f1p0/2080|i4_LQ_LCRFT_c57359/f1p3/3647|i6_LQ_LCRFT_c4398/f1p0/5262|i2_LQ_LCRFT_c98791/f1p0/2279|i1_HQ_LCRFT_c196654/f6p1/1911|i1_LQ_LCRFT_c26530/f1p7/1847|i5_LQ_LCRFT_c7542/f1p0/4950|i2_LQ_LCRFT_c58963/f1p8/2470|i2_LQ_LCRFT_c91681/f1p2/2813|i1_LQ_LCRFT_c74526/f1p1/1841|i4_LQ_LCRFT_c36250/f1…	http://www.genome.jp/kegg-bin/show_pathway?ko00040/K00854%09red/K00963%09red/K01805%09red/K00008%09red/K00128%09red/K01051%09red/K01783%09red/K12447%09red/K00012%09red/K01728%09red
Phenylpropanoid biosynthesis	0.222571	0.401122	142	ko00940	0.0398921	0.401122	i1_LQ_LCRFT_c71035/f1p1/1914|i1_LQ_LCRFT_c90298/f1p0/1168|i1_LQ_LCRFT_c117053/f1p2/1772|i1_HQ_LCRFT_c107211/f58p7/1360|i1_LQ_LCRFT_c120629/f1p4/1850|i1_LQ_LCRFT_c40565/f1p5/1445|i4_HQ_LCRFT_c68824/f7p0/3189|i3_LQ_LCRFT_c73281/f1p0/2793|i1_HQ_LCRFT_c66261/f2p6/1588|i3_LQ_LCRFT_c10565/f1p0/2609|i2_LQ_LCRFT_c12598/f1p0/2160|i3_LQ_LCRFT_c42353/f1p0/2432|i0_LQ_LCRFT_c190205/f1p1/845|i0_LQ_LCRFT_c13918…	http://www.genome.jp/kegg-bin/show_pathway?ko00940/K00588%09red/K13065%09red/K10775%09red/K13066%09red/K01188%09red/K00083%09red/K12355%09red/K12356%09red/K05350%09red/K01904%09red/K09754%09red/K05349%09red/K00487%09red/K00430%09red/K09753%09red
Isoflavonoid biosynthesis	0.8	0.401122	4	ko00943	0.0406189	0.401122	i1_LQ_LCRFT_c99572/f1p6/1479|i1_LQ_LCRFT_c115558/f1p5/1381|i1_HQ_LCRFT_c66192/f20p5/1269|i1_LQ_LCRFT_c167746/f1p5/1186	http://www.genome.jp/kegg-bin/show_pathway?ko00943/K13262%09red
Isoquinoline alkaloid biosynthesis	0.261438	0.401122	40	ko00950	0.042395	0.401122	i1_HQ_LCRFT_c14934/f8p2/1591|i2_LQ_LCRFT_c74414/f1p3/2186|i3_LQ_LCRFT_c71717/f1p0/2261|i2_LQ_LCRFT_c21640/f1p0/2250|i2_HQ_LCRFT_c109284/f3p0/2827|i4_LQ_LCRFT_c10941/f1p0/3116|i1_LQ_LCRFT_c3840/f1p0/1344|i1_HQ_LCRFT_c22586/f3p0/1645|i2_LQ_LCRFT_c24610/f1p0/2497|i3_HQ_LCRFT_c26239/f5p4/2836|i1_LQ_LCRFT_c12763/f1p1/1491|i1_LQ_LCRFT_c36907/f1p5/1793|i1_LQ_LCRFT_c162269/f1p5/1769|i1_HQ_LCRFT_c59092/f3…	http://www.genome.jp/kegg-bin/show_pathway?ko00950/K00276%09red/K14455%09red/K14454%09red/K15849%09red/K13384%09red/K00811%09red/K13397%09red/K00815%09red
Stilbenoid, diarylheptanoid and gingerol biosynthesis	0.277778	0.418676	25	ko00945	0.0583013	0.418676	i1_LQ_LCRFT_c120746/f1p2/1301|i4_LQ_LCRFT_c55440/f1p0/3969|i1_LQ_LCRFT_c38477/f1p17/2033|i2_HQ_LCRFT_c77286/f2p0/2942|i1_LQ_LCRFT_c41360/f1p2/1349|i1_HQ_LCRFT_c205948/f2p1/1912|i2_LQ_LCRFT_c12598/f1p0/2160|i1_LQ_LCRFT_c13917/f1p2/1819|i0_LQ_LCRFT_c84773/f1p1/917|i1_HQ_LCRFT_c19569/f2p3/1235|i4_HQ_LCRFT_c1895/f8p21/3916|i1_HQ_LCRFT_c85739/f17p3/1338|i4_HQ_LCRFT_c21070/f3p2/3976|i1_HQ_LCRFT_c18373/…	http://www.genome.jp/kegg-bin/show_pathway?ko00945/K16040%09red/K13065%09red/K09754%09red/K00588%09red/K00487%09red/K00517%09red
Linoleic acid metabolism	0.240506	0.418676	57	ko00591	0.0585784	0.418676	i4_LQ_LCRFT_c48927/f1p0/3038|i4_LQ_LCRFT_c14719/f1p7/3265|i4_HQ_LCRFT_c88200/f142p0/3386|i5_LQ_LCRFT_c2244/f1p0/4733|i4_LQ_LCRFT_c84361/f1p0/3019|i3_LQ_LCRFT_c8545/f1p0/2854|i4_HQ_LCRFT_c10271/f5p0/3426|i1_LQ_LCRFT_c171757/f1p16/1157|i5_LQ_LCRFT_c6236/f1p0/4116|i4_HQ_LCRFT_c87341/f62p0/3226|i3_HQ_LCRFT_c111892/f2p0/2759|i2_LQ_LCRFT_c37622/f1p0/2803|i2_LQ_LCRFT_c75315/f1p0/2948|i1_LQ_LCRFT_c54417/…	http://www.genome.jp/kegg-bin/show_pathway?ko00591/K14674%09red/K00454%09red/K15718%09red/K07418%09red
Ubiquitin mediated proteolysis	0.210974	0.418676	223	ko04120	0.0642485	0.418676	i3_LQ_LCRFT_c26639/f1p0/2744|i3_LQ_LCRFT_c113936/f1p0/2812|i2_LQ_LCRFT_c92956/f1p0/2813|i5_LQ_LCRFT_c15782/f1p0/4058|i3_LQ_LCRFT_c23156/f1p1/2890|i4_LQ_LCRFT_c44214/f1p0/3883|i6_LQ_LCRFT_c2126/f1p0/5421|i1_LQ_LCRFT_c168628/f1p2/1169|i4_LQ_LCRFT_c66627/f1p9/3020|i5_LQ_LCRFT_c16955/f1p0/4016|i4_HQ_LCRFT_c12172/f2p0/3273|i2_LQ_LCRFT_c13071/f1p42/2685|i5_HQ_LCRFT_c22527/f15p0/4394|i2_LQ_LCRFT_c72607/…	http://www.genome.jp/kegg-bin/show_pathway?ko04120/K10601%09red/K10597%09red/K10590%09red/K10591%09red/K06689%09red/K10579%09red/K10576%09red/K10577%09red/K10575%09red/K10598%09red/K10599%09red/K10570%09red/K10571%09red/K10140%09red/K10592%09red/K04649%09red/K06688%09red/K03350%09red/K20217%09red/K04706%09red/K03354%09red/K10609%09red/K03358%09red/K04506%09red/K10581%09red/K10580%09red/K10578%09r…
Valine, leucine and isoleucine degradation	0.219858	0.418676	124	ko00280	0.065202	0.418676	i1_LQ_LCRFT_c114231/f1p4/1366|i5_LQ_LCRFT_c12260/f1p0/4586|i5_LQ_LCRFT_c12865/f1p1/4643|i4_LQ_LCRFT_c35824/f1p0/3436|i4_LQ_LCRFT_c56737/f1p16/3640|i1_HQ_LCRFT_c206799/f3p0/1894|i3_LQ_LCRFT_c59559/f1p107/3007|i2_LQ_LCRFT_c105533/f1p0/2074|i2_LQ_LCRFT_c103533/f1p0/2080|i4_LQ_LCRFT_c43207/f1p0/3195|i4_LQ_LCRFT_c8076/f1p0/3178|i2_LQ_LCRFT_c59843/f1p0/2643|i0_LQ_LCRFT_c59265/f1p0/801|i1_LQ_LCRFT_c7026…	http://www.genome.jp/kegg-bin/show_pathway?ko00280/K00249%09red/K18660%09red/K07513%09red/K05607%09red/K05605%09red/K00166%09red/K00167%09red/K00140%09red/K00128%09red/K00827%09red/K00826%09red/K00382%09red/K00253%09red/K01640%09red/K01641%09red/K09699%09red/K00626%09red/K01969%09red/K01968%09red
RNA polymerase	0.233577	0.418676	64	ko03020	0.0706317	0.418676	i4_LQ_LCRFT_c9858/f1p0/3146|i1_LQ_LCRFT_c141602/f1p8/1967|i0_LQ_LCRFT_c184916/f1p0/566|i5_LQ_LCRFT_c19398/f1p1/4330|i3_LQ_LCRFT_c73538/f1p1/2407|i4_LQ_LCRFT_c71832/f1p0/3421|i3_LQ_LCRFT_c39989/f1p17/2348|i0_LQ_LCRFT_c327898/f1p0/764|i1_LQ_LCRFT_c52253/f1p0/1320|i2_LQ_LCRFT_c58586/f1p0/2456|i2_LQ_LCRFT_c25597/f1p11/2700|i5_LQ_LCRFT_c18628/f1p4/4631|i4_LQ_LCRFT_c79722/f1p0/3401|i5_LQ_LCRFT_c11470/f…	http://www.genome.jp/kegg-bin/show_pathway?ko03020/K03020%09red/K03026%09red/K03016%09red/K03006%09red/K03007%09red/K03005%09red/K03011%09red/K03010%09red/K03013%09red/K03012%09red/K03002%09red/K02999%09red/K03046%09red/K03018%09red/K14721%09red/K03009%09red
Zeatin biosynthesis	0.287879	0.418676	19	ko00908	0.071598	0.418676	i2_LQ_LCRFT_c28881/f1p1/2242|i4_LQ_LCRFT_c21768/f1p2/3996|i2_LQ_LCRFT_c51568/f1p0/2169|i2_HQ_LCRFT_c107117/f4p0/2134|i6_LQ_LCRFT_c1508/f1p0/5304|i5_LQ_LCRFT_c6123/f1p0/4073|i3_HQ_LCRFT_c43140/f2p0/2294|i4_LQ_LCRFT_c19862/f1p12/3668|i1_LQ_LCRFT_c120568/f1p0/1600|i3_LQ_LCRFT_c13573/f1p0/2821|i1_LQ_LCRFT_c135812/f1p2/1426|i6_HQ_LCRFT_c317/f2p0/5210|i2_HQ_LCRFT_c67349/f2p0/2258|i3_LQ_LCRFT_c3211/f1p0…	http://www.genome.jp/kegg-bin/show_pathway?ko00908/K13495%09red/K00279%09red/K00791%09red
Glycolysis / Gluconeogenesis	0.208665	0.418676	236	ko00010	0.0783774	0.418676	i1_HQ_LCRFT_c208974/f3p5/1769|i1_LQ_LCRFT_c35377/f1p1/1998|i4_LQ_LCRFT_c25913/f1p0/3958|i1_HQ_LCRFT_c7492/f2p5/1418|i1_LQ_LCRFT_c84498/f1p7/1012|i3_LQ_LCRFT_c90840/f1p0/2655|i2_LQ_LCRFT_c103533/f1p0/2080|i4_LQ_LCRFT_c11573/f1p1/3177|i2_LQ_LCRFT_c3528/f1p0/2169|i5_LQ_LCRFT_c20014/f1p0/4515|i1_LQ_LCRFT_c165098/f1p9/1889|i2_LQ_LCRFT_c23723/f1p9/2219|i4_HQ_LCRFT_c8876/f2p0/3298|i4_LQ_LCRFT_c62364/f1p…	http://www.genome.jp/kegg-bin/show_pathway?ko00010/K00850%09red/K01689%09red/K00895%09red/K18857%09red/K01623%09red/K01810%09red/K00873%09red/K00627%09red/K00134%09red/K00131%09red/K01835%09red/K01834%09red/K01895%09red/K00016%09red/K03103%09red/K00844%09red/K01792%09red/K03841%09red/K01610%09red/K00927%09red/K01803%09red/K00161%09red/K00162%09red/K00128%09red/K01568%09red/K00382%09red/K00121%09r…
