# Supplementary material for: <span aria-describedby="tippy-17">Transcriptomic and Metabolomic Profiling Provides Insights into Flavonoids Biosynthesis and Flower Coloring in <em>Loropetalum chinense</em> and <em>Loropetalum chinense</em> var. <em>rubrum</em>
Source: Preprints.org preprint supplement (doi:10.20944/preprints202304.0456.v1), 2023-04-18
Supplement: Supplementary file 27 [file supplementary table S32.xlsx]

## Sheet: Table S32  
Supplementary table S32 The KEGG enrichment analysis of DETs between XNFJ VS XNNC group
pathway_term	rich_factor	qvalue	gene_number	ID	P-Value	Corrected P-Value	Input	Hyperlink
Plant hormone signal transduction	0.274943	0.00232564	361	ko04075	1.89077e-05	0.00232564	i1_HQ_LCRFT_c158324/f21p7/1179|i0_LQ_LCRFT_c146976/f1p0/831|i3_LQ_LCRFT_c36268/f1p0/2403|i5_HQ_LCRFT_c1169/f3p0/4948|i4_LQ_LCRFT_c40179/f1p0/3262|i2_LQ_LCRFT_c64565/f1p0/2031|i1_LQ_LCRFT_c169159/f1p4/1949|i1_HQ_LCRFT_c205227/f4p1/1105|i4_LQ_LCRFT_c28524/f1p1/3285|i3_LQ_LCRFT_c27778/f1p15/2201|i3_LQ_LCRFT_c70481/f1p0/2705|i1_LQ_LCRFT_c118681/f1p4/1978|i1_LQ_LCRFT_c114901/f1p4/1618|i3_LQ_LCRFT_c959…	http://www.genome.jp/kegg-bin/show_pathway?ko04075/K14486%09red/K14487%09red/K14484%09red/K14485%09red/K14488%09red/K14489%09red/K13449%09red/K13946%09red/K13415%09red/K13416%09red/K14432%09red/K14431%09red/K14510%09red/K14512%09red/K14514%09red/K14515%09red/K14516%09red/K14494%09red/K14497%09red/K14496%09red/K14491%09red/K14490%09red/K14493%09red/K14492%09red/K14499%09red/K14498%09red/K14506%09r…
Glutathione metabolism	0.295652	0.00774204	170	ko00480	0.000186228	0.00774204	i1_HQ_LCRFT_c100556/f3p3/1371|i1_LQ_LCRFT_c3428/f1p3/1333|i0_LQ_LCRFT_c10338/f1p0/997|i3_LQ_LCRFT_c41364/f1p3/2336|i1_LQ_LCRFT_c59702/f1p1/2008|i0_HQ_LCRFT_c157175/f2p0/960|i3_LQ_LCRFT_c19169/f1p8/2591|i4_LQ_LCRFT_c14673/f1p5/3084|i0_LQ_LCRFT_c50861/f2p0/749|i1_LQ_LCRFT_c54195/f1p3/1320|i1_HQ_LCRFT_c204774/f3p2/1943|i1_LQ_LCRFT_c56405/f1p3/1529|i3_LQ_LCRFT_c61687/f1p0/2764|i0_LQ_LCRFT_c317851/f3p…	http://www.genome.jp/kegg-bin/show_pathway?ko00480/K01469%09red/K10808%09red/K01255%09red/K01256%09red/K18592%09red/K00797%09red/K00036%09red/K00799%09red/K00383%09red/K00432%09red/K01919%09red/K00033%09red/K00434%09red/K00031%09red
Photosynthesis - antenna proteins	0.4	0.00774204	52	ko00196	0.00018883	0.00774204	i0_LQ_LCRFT_c254371/f2p0/1013|i1_LQ_LCRFT_c94518/f1p13/1916|i1_HQ_LCRFT_c32662/f40p8/1027|i1_LQ_LCRFT_c126858/f1p13/1082|i0_HQ_LCRFT_c243653/f40p0/978|i1_LQ_LCRFT_c113922/f1p12/1403|i0_HQ_LCRFT_c243752/f2p0/746|i1_LQ_LCRFT_c16328/f1p12/1186|i2_LQ_LCRFT_c22903/f1p0/2216|i2_LQ_LCRFT_c72214/f1p0/2604|i0_LQ_LCRFT_c199134/f1p6/790|i1_LQ_LCRFT_c171149/f1p7/1207|i0_HQ_LCRFT_c67209/f3p0/1011|i1_HQ_LCRFT_…	http://www.genome.jp/kegg-bin/show_pathway?ko00196/K08907%09red/K08908%09red/K08909%09red/K08915%09red/K08914%09red/K08917%09red/K08916%09red/K08911%09red/K08910%09red/K08913%09red/K08912%09red
Flavonoid biosynthesis	0.333333	0.008865	89	ko00941	0.000303556	0.008865	i1_HQ_LCRFT_c39681/f3p11/1361|i1_HQ_LCRFT_c156486/f35p5/1294|i2_LQ_LCRFT_c79439/f1p0/2132|i1_LQ_LCRFT_c12738/f1p0/1429|i1_LQ_LCRFT_c145468/f1p2/1300|i1_LQ_LCRFT_c137709/f1p0/1748|i3_HQ_LCRFT_c2455/f9p0/2222|i1_LQ_LCRFT_c206544/f1p3/1802|i1_HQ_LCRFT_c131605/f11p3/1398|i1_LQ_LCRFT_c98539/f1p1/1386|i1_LQ_LCRFT_c76496/f1p15/1557|i1_LQ_LCRFT_c94170/f1p6/1857|i1_LQ_LCRFT_c2662/f1p2/1534|i5_LQ_LCRFT_c13…	http://www.genome.jp/kegg-bin/show_pathway?ko00941/K13065%09red/K08695%09red/K13083%09red/K13082%09red/K13081%09red/K00475%09red/K05277%09red/K00660%09red/K09754%09red/K00588%09red/K05278%09red/K00487%09red/K05280%09red
Monoterpenoid biosynthesis	0.470588	0.008865	32	ko00902	0.000360366	0.008865	i2_HQ_LCRFT_c12969/f2p26/2629|i1_HQ_LCRFT_c80537/f4p3/1057|i4_LQ_LCRFT_c77571/f1p2/3729|i3_LQ_LCRFT_c78004/f1p3/2430|i1_LQ_LCRFT_c76640/f1p1/1138|i1_LQ_LCRFT_c81557/f1p1/1049|i5_LQ_LCRFT_c5291/f1p0/4313|i1_LQ_LCRFT_c163126/f1p0/1177|i1_LQ_LCRFT_c115956/f1p4/1148|i1_LQ_LCRFT_c103362/f1p4/1111|i1_LQ_LCRFT_c98359/f1p0/1807|i5_LQ_LCRFT_c1855/f2p0/4520|i4_HQ_LCRFT_c26281/f3p0/3291|i5_LQ_LCRFT_c13258/f…	http://www.genome.jp/kegg-bin/show_pathway?ko00902/K15086%09red/K15095%09red
Circadian rhythm - plant	0.287526	0.0371962	136	ko04712	0.00181445	0.0371962	i7_LQ_LCRFT_c1037/f1p0/6098|i4_HQ_LCRFT_c68995/f8p0/3073|i4_HQ_LCRFT_c1864/f6p2/3865|i1_LQ_LCRFT_c12738/f1p0/1429|i1_LQ_LCRFT_c19587/f1p2/1363|i2_LQ_LCRFT_c89924/f1p1/3005|i1_HQ_LCRFT_c40974/f3p6/1894|i2_LQ_LCRFT_c78492/f1p26/2894|i2_HQ_LCRFT_c4980/f2p0/2804|i2_LQ_LCRFT_c12885/f1p1/2779|i3_LQ_LCRFT_c55506/f1p0/2461|i3_LQ_LCRFT_c111241/f1p0/2911|i2_LQ_LCRFT_c28639/f1p21/2607|i5_LQ_LCRFT_c1313/f1p0…	http://www.genome.jp/kegg-bin/show_pathway?ko04712/K10143%09red/K12118%09red/K16241%09red/K12133%09red/K03097%09red/K00660%09red/K12119%09red/K16166%09red/K12115%09red/K12120%09red/K12127%09red/K03115%09red/K12125%09red/K12124%09red/K12130%09red/K12129%09red/K16240%09red/K12126%09red
Lysine degradation	0.284464	0.0536292	130	ko00310	0.00305207	0.0536292	i0_LQ_LCRFT_c282303/f1p0/584|i4_LQ_LCRFT_c4690/f1p0/3803|i3_LQ_LCRFT_c24819/f1p0/2322|i1_HQ_LCRFT_c206799/f3p0/1894|i2_LQ_LCRFT_c103533/f1p0/2080|i4_HQ_LCRFT_c2297/f4p0/3685|i4_LQ_LCRFT_c44641/f1p0/3586|i4_LQ_LCRFT_c57359/f1p3/3647|i5_LQ_LCRFT_c20459/f1p3/4749|i2_LQ_LCRFT_c92904/f1p33/2940|i1_LQ_LCRFT_c26530/f1p7/1847|i3_LQ_LCRFT_c44418/f1p0/2254|i4_HQ_LCRFT_c5457/f2p1/3354|i2_LQ_LCRFT_c56173/f1p…	http://www.genome.jp/kegg-bin/show_pathway?ko00310/K11423%09red/K18826%09red/K00658%09red/K00164%09red/K00306%09red/K14157%09red/K00128%09red/K11420%09red/K14085%09red/K00626%09red
Sphingolipid metabolism	0.295385	0.0600308	96	ko00600	0.00415729	0.0600308	i1_LQ_LCRFT_c60610/f1p2/1365|i4_LQ_LCRFT_c27711/f1p0/3853|i2_LQ_LCRFT_c55349/f1p0/2156|i1_HQ_LCRFT_c184390/f6p2/1697|i1_LQ_LCRFT_c6062/f2p1/1786|i3_LQ_LCRFT_c77780/f1p0/2514|i4_HQ_LCRFT_c26565/f2p0/3610|i2_HQ_LCRFT_c60542/f2p2/2623|i3_LQ_LCRFT_c71036/f1p1/2394|i5_LQ_LCRFT_c16301/f1p0/4021|i2_LQ_LCRFT_c39653/f1p0/2793|i2_LQ_LCRFT_c10782/f1p0/2605|i3_LQ_LCRFT_c73530/f1p0/2137|i3_HQ_LCRFT_c88279/f3p…	http://www.genome.jp/kegg-bin/show_pathway?ko00600/K01190%09red/K17108%09red/K12309%09red/K04713%09red/K04712%09red/K04711%09red/K04710%09red/K04715%09red/K07407%09red/K01634%09red/K04708%09red/K00654%09red/K12349%09red
Glycolysis / Gluconeogenesis	0.255526	0.0600308	289	ko00010	0.0043925	0.0600308	i1_HQ_LCRFT_c208974/f3p5/1769|i2_HQ_LCRFT_c107368/f11p0/2514|i3_LQ_LCRFT_c61292/f1p0/2578|i3_LQ_LCRFT_c23732/f1p0/2154|i1_LQ_LCRFT_c194722/f1p9/1319|i1_HQ_LCRFT_c3671/f2p4/1703|i1_HQ_LCRFT_c25352/f2p1/1297|i3_HQ_LCRFT_c63499/f2p0/2047|i1_LQ_LCRFT_c25931/f1p9/1919|i3_LQ_LCRFT_c78965/f1p0/2654|i3_LQ_LCRFT_c90840/f1p0/2655|i2_LQ_LCRFT_c103533/f1p0/2080|i0_LQ_LCRFT_c282303/f1p0/584|i2_LQ_LCRFT_c3528/…	http://www.genome.jp/kegg-bin/show_pathway?ko00010/K00850%09red/K01689%09red/K14085%09red/K18857%09red/K01623%09red/K01810%09red/K00873%09red/K00627%09red/K00134%09red/K00131%09red/K01835%09red/K01834%09red/K01895%09red/K00016%09red/K03103%09red/K00844%09red/K01792%09red/K03841%09red/K01610%09red/K00927%09red/K01803%09red/K00161%09red/K00162%09red/K00128%09red/K01785%09red/K01568%09red/K00382%09r…
Pentose and glucuronate interconversions	0.276553	0.0649297	138	ko00040	0.00527884	0.0649297	i1_LQ_LCRFT_c25054/f1p15/1999|i0_LQ_LCRFT_c282303/f1p0/584|i6_LQ_LCRFT_c4398/f1p0/5262|i2_HQ_LCRFT_c107147/f5p0/2239|i3_LQ_LCRFT_c24819/f1p0/2322|i1_HQ_LCRFT_c2139/f26p4/1829|i1_HQ_LCRFT_c206799/f3p0/1894|i2_LQ_LCRFT_c103533/f1p0/2080|i2_LQ_LCRFT_c27937/f1p0/2219|i2_LQ_LCRFT_c27592/f1p0/2757|i4_LQ_LCRFT_c14372/f1p12/3330|i4_LQ_LCRFT_c5334/f1p5/3681|i2_LQ_LCRFT_c92904/f1p33/2940|i1_LQ_LCRFT_c26530…	http://www.genome.jp/kegg-bin/show_pathway?ko00040/K01213%09red/K01184%09red/K16190%09red/K00963%09red/K01805%09red/K00128%09red/K01051%09red/K01783%09red/K12447%09red/K00012%09red/K01728%09red
Pyruvate metabolism	0.255524	0.0676807	266	ko00620	0.00605275	0.0676807	i1_HQ_LCRFT_c208974/f3p5/1769|i2_HQ_LCRFT_c107368/f11p0/2514|i0_LQ_LCRFT_c282303/f1p0/584|i3_LQ_LCRFT_c23732/f1p0/2154|i2_LQ_LCRFT_c9898/f1p0/2315|i3_LQ_LCRFT_c24819/f1p0/2322|i2_LQ_LCRFT_c72138/f1p1/2626|i2_LQ_LCRFT_c61765/f1p0/2505|i2_LQ_LCRFT_c103533/f1p0/2080|i1_LQ_LCRFT_c194289/f1p7/1667|i5_LQ_LCRFT_c4107/f1p1/4275|i1_LQ_LCRFT_c145221/f1p3/1709|i2_LQ_LCRFT_c27937/f1p0/2219|i3_LQ_LCRFT_c73369…	http://www.genome.jp/kegg-bin/show_pathway?ko00620/K01649%09red/K14085%09red/K00873%09red/K11262%09red/K00627%09red/K00626%09red/K01958%09red/K01895%09red/K00016%09red/K18881%09red/K01069%09red/K01006%09red/K01679%09red/K01512%09red/K01759%09red/K01595%09red/K01962%09red/K02160%09red/K01638%09red/K00161%09red/K00162%09red/K00128%09red/K00029%09red/K00028%09red/K00382%09red/K00025%09red/K00026%09r…
Tyrosine metabolism	0.29588	0.0851522	79	ko00350	0.00830754	0.0851522	i0_LQ_LCRFT_c84050/f1p0/958|i1_HQ_LCRFT_c14934/f8p2/1591|i2_LQ_LCRFT_c74414/f1p3/2186|i3_LQ_LCRFT_c71717/f1p0/2261|i1_LQ_LCRFT_c135369/f1p4/1377|i1_LQ_LCRFT_c119229/f1p3/1822|i1_HQ_LCRFT_c3671/f2p4/1703|i4_LQ_LCRFT_c10941/f1p0/3116|i1_HQ_LCRFT_c25352/f2p1/1297|i1_LQ_LCRFT_c140681/f1p9/1371|i4_LQ_LCRFT_c13295/f1p1/3149|i0_LQ_LCRFT_c201452/f1p0/507|i2_LQ_LCRFT_c18054/f6p0/2152|i1_HQ_LCRFT_c69542/f3…	http://www.genome.jp/kegg-bin/show_pathway?ko00350/K00276%09red/K14455%09red/K14454%09red/K00451%09red/K01800%09red/K01555%09red/K15849%09red/K18857%09red/K00811%09red/K00815%09red/K00817%09red/K07253%09red/K00121%09red/K00457%09red/K00422%09red
Sesquiterpenoid and triterpenoid biosynthesis	0.317881	0.115394	48	ko00909	0.0128812	0.115394	i2_LQ_LCRFT_c70938/f1p0/2223|i1_LQ_LCRFT_c98606/f1p0/1684|i4_LQ_LCRFT_c43854/f1p0/3718|i3_LQ_LCRFT_c54813/f1p0/2776|i1_LQ_LCRFT_c40206/f1p1/1870|i5_LQ_LCRFT_c13331/f1p0/4135|i5_LQ_LCRFT_c5196/f1p0/4551|i1_LQ_LCRFT_c96955/f1p0/1938|i1_LQ_LCRFT_c98043/f1p0/1703|i1_LQ_LCRFT_c13069/f1p9/1710|i2_LQ_LCRFT_c38206/f1p1/2177|i2_LQ_LCRFT_c44301/f1p1/2185|i7_LQ_LCRFT_c128/f1p0/6601|i1_HQ_LCRFT_c60789/f2p8/1…	http://www.genome.jp/kegg-bin/show_pathway?ko00909/K00511%09red/K14182%09red/K15803%09red/K00801%09red
Tryptophan metabolism	0.278237	0.115394	101	ko00380	0.0131342	0.115394	i0_LQ_LCRFT_c282303/f1p0/584|i3_LQ_LCRFT_c24819/f1p0/2322|i1_HQ_LCRFT_c206799/f3p0/1894|i2_LQ_LCRFT_c103533/f1p0/2080|i2_LQ_LCRFT_c27937/f1p0/2219|i3_LQ_LCRFT_c78930/f1p10/2461|i4_LQ_LCRFT_c57359/f1p3/3647|i1_HQ_LCRFT_c204779/f3p2/1975|i3_LQ_LCRFT_c79629/f1p0/2309|i2_LQ_LCRFT_c92904/f1p33/2940|i1_LQ_LCRFT_c26530/f1p7/1847|i2_LQ_LCRFT_c5044/f1p0/2609|i1_HQ_LCRFT_c206736/f6p3/1308|i4_LQ_LCRFT_c2104…	http://www.genome.jp/kegg-bin/show_pathway?ko00380/K03781%09red/K00128%09red/K00164%09red/K11816%09red/K14085%09red/K01426%09red/K00626%09red/K11820%09red
Limonene and pinene degradation	0.30102	0.126677	59	ko00903	0.0154484	0.126677	i1_LQ_LCRFT_c11270/f1p2/1209|i0_LQ_LCRFT_c282303/f1p0/584|i1_HQ_LCRFT_c207690/f153p8/1843|i1_HQ_LCRFT_c18373/f3p1/1651|i3_LQ_LCRFT_c22391/f1p0/2303|i3_LQ_LCRFT_c94103/f1p1/2230|i4_HQ_LCRFT_c87351/f10p0/3070|i2_LQ_LCRFT_c24240/f1p0/2732|i1_HQ_LCRFT_c206799/f3p0/1894|i3_LQ_LCRFT_c79680/f1p0/2128|i2_LQ_LCRFT_c103533/f1p0/2080|i1_LQ_LCRFT_c71065/f1p0/1716|i3_LQ_LCRFT_c14478/f1p0/2922|i1_LQ_LCRFT_c265…	http://www.genome.jp/kegg-bin/show_pathway?ko00903/K00128%09red/K00517%09red
Carotenoid biosynthesis	0.292308	0.197272	57	ko00906	0.0260555	0.197272	i2_LQ_LCRFT_c64134/f1p0/2037|i0_LQ_LCRFT_c202968/f1p0/990|i2_LQ_LCRFT_c44512/f1p0/2482|i3_LQ_LCRFT_c71163/f1p0/2661|i2_HQ_LCRFT_c25821/f2p5/2281|i3_HQ_LCRFT_c120121/f10p1/2635|i5_LQ_LCRFT_c3172/f1p19/4620|i4_LQ_LCRFT_c59568/f1p0/3748|i4_LQ_LCRFT_c28011/f1p0/3977|i1_LQ_LCRFT_c120250/f1p0/1597|i3_HQ_LCRFT_c21976/f2p3/2162|i2_LQ_LCRFT_c14480/f1p0/2178|i3_LQ_LCRFT_c92844/f1p1/2444|i3_LQ_LCRFT_c78078/…	http://www.genome.jp/kegg-bin/show_pathway?ko00906/K09840%09red/K09841%09red/K09842%09red/K09843%09red/K02291%09red/K02293%09red/K00514%09red/K09835%09red/K14595%09red/K15746%09red/K06443%09red/K09838%09red/K06444%09red/K15747%09red
Inositol phosphate metabolism	0.262156	0.197272	124	ko00562	0.0272652	0.197272	i4_LQ_LCRFT_c25055/f1p0/3350|i1_LQ_LCRFT_c113850/f1p5/1730|i3_HQ_LCRFT_c1617/f4p1/2202|i4_LQ_LCRFT_c58482/f1p0/3060|i1_LQ_LCRFT_c163620/f1p2/1769|i3_LQ_LCRFT_c60490/f1p0/2653|i1_LQ_LCRFT_c222445/f1p7/850|i5_LQ_LCRFT_c3248/f1p4/4325|i4_LQ_LCRFT_c20204/f1p2/3966|i3_LQ_LCRFT_c24012/f1p10/2447|i2_LQ_LCRFT_c23315/f1p1/2272|i2_LQ_LCRFT_c73427/f1p6/2138|i4_LQ_LCRFT_c76335/f1p3/3737|i2_LQ_LCRFT_c39552/f1…	http://www.genome.jp/kegg-bin/show_pathway?ko00562/K01092%09red/K00140%09red/K19801%09red/K00921%09red/K03103%09red/K01110%09red/K01803%09red/K10572%09red/K01114%09red/K05857%09red/K00914%09red/K01858%09red/K00913%09red/K18081%09red/K00469%09red/K00889%09red/K00888%09red
Phenylalanine, tyrosine and tryptophan biosynthesis	0.266839	0.199057	103	ko00400	0.0291303	0.199057	i1_LQ_LCRFT_c112704/f1p0/1849|i4_LQ_LCRFT_c10941/f1p0/3116|i2_LQ_LCRFT_c52246/f1p0/2826|i4_HQ_LCRFT_c24055/f2p4/3492|i2_HQ_LCRFT_c38897/f2p0/2176|i1_LQ_LCRFT_c171518/f1p1/1469|i3_HQ_LCRFT_c120272/f11p0/2163|i2_LQ_LCRFT_c30236/f1p0/2036|i4_HQ_LCRFT_c82740/f3p0/3035|i1_LQ_LCRFT_c209377/f1p6/1949|i3_LQ_LCRFT_c54276/f1p0/2929|i2_HQ_LCRFT_c7771/f2p12/2895|i4_LQ_LCRFT_c4499/f1p0/3523|i1_HQ_LCRFT_c20480…	http://www.genome.jp/kegg-bin/show_pathway?ko00400/K01736%09red/K14455%09red/K14454%09red/K01658%09red/K00891%09red/K15849%09red/K06001%09red/K01817%09red/K00811%09red/K13832%09red/K00815%09red/K01626%09red/K00817%09red/K01657%09red/K00766%09red/K01850%09red/K05359%09red/K15227%09red/K00800%09red
Phenylalanine metabolism	0.268072	0.233418	89	ko00360	0.0368041	0.233418	i3_LQ_LCRFT_c71717/f1p0/2261|i4_LQ_LCRFT_c10941/f1p0/3116|i4_LQ_LCRFT_c57529/f1p0/3394|i2_LQ_LCRFT_c24610/f1p0/2497|i1_LQ_LCRFT_c171518/f1p1/1469|i2_LQ_LCRFT_c30236/f1p0/2036|i1_LQ_LCRFT_c119687/f1p4/1722|i1_HQ_LCRFT_c17819/f15p4/1986|i1_HQ_LCRFT_c204779/f3p2/1975|i1_LQ_LCRFT_c94170/f1p6/1857|i3_LQ_LCRFT_c54276/f1p0/2929|i4_LQ_LCRFT_c4499/f1p0/3523|i3_LQ_LCRFT_c42353/f1p0/2432|i2_LQ_LCRFT_c94869/…	http://www.genome.jp/kegg-bin/show_pathway?ko00360/K00276%09red/K14455%09red/K14454%09red/K00074%09red/K00487%09red/K00457%09red/K15849%09red/K00811%09red/K01904%09red/K00817%09red/K07253%09red/K00588%09red/K01426%09red/K10775%09red/K00815%09red
Glycerolipid metabolism	0.254417	0.233418	144	ko00561	0.0379542	0.233418	i0_LQ_LCRFT_c282303/f1p0/584|i3_LQ_LCRFT_c25276/f1p0/2589|i4_LQ_LCRFT_c88672/f4p0/3375|i3_LQ_LCRFT_c24819/f1p0/2322|i1_HQ_LCRFT_c206799/f3p0/1894|i2_LQ_LCRFT_c103533/f1p0/2080|i3_LQ_LCRFT_c52835/f1p2/2210|i4_LQ_LCRFT_c19336/f1p2/3537|i2_LQ_LCRFT_c27937/f1p0/2219|i3_LQ_LCRFT_c54617/f1p5/2143|i4_LQ_LCRFT_c21511/f1p3/3514|i1_HQ_LCRFT_c184390/f6p2/1697|i2_HQ_LCRFT_c70653/f2p8/2224|i1_LQ_LCRFT_c145677…	http://www.genome.jp/kegg-bin/show_pathway?ko00561/K15728%09red/K13506%09red/K01054%09red/K09480%09red/K13519%09red/K15918%09red/K11155%09red/K13523%09red/K00901%09red/K03715%09red/K00128%09red/K13508%09red/K00679%09red/K14085%09red/K14674%09red/K07407%09red/K13513%09red/K00630%09red/K00863%09red/K06119%09red/K06118%09red
