# Supplementary material for: <span aria-describedby="tippy-17">Transcriptomic and Metabolomic Profiling Provides Insights into Flavonoids Biosynthesis and Flower Coloring in <em>Loropetalum chinense</em> and <em>Loropetalum chinense</em> var. <em>rubrum</em>
Source: Preprints.org preprint supplement (doi:10.20944/preprints202304.0456.v1), 2023-04-18
Supplement: Supplementary file 28 [file supplementary table S33.xlsx]

## Sheet: Table S33  
Supplementary table S33 The KEGG enrichment analysis of DETs between XNFJ VS XNXY group
pathway_term	rich_factor	qvalue	gene_number	ID	P-Value	Corrected P-Value	Input	Hyperlink
Plant-pathogen interaction	0.249346	0.092308	286	ko04626	0.000756623	0.092308	i3_HQ_LCRFT_c123546/f4p0/2497|i4_HQ_LCRFT_c71746/f2p0/3374|i4_LQ_LCRFT_c22263/f1p0/3585|i4_LQ_LCRFT_c58553/f1p0/3538|i1_LQ_LCRFT_c98353/f1p2/1364|i1_LQ_LCRFT_c22104/f1p0/1361|i4_HQ_LCRFT_c4675/f2p0/3136|i2_LQ_LCRFT_c7989/f1p0/2551|i6_LQ_LCRFT_c2482/f1p8/5417|i2_LQ_LCRFT_c40350/f1p0/2507|i1_LQ_LCRFT_c222111/f1p3/1066|i1_LQ_LCRFT_c171380/f1p2/1272|i6_LQ_LCRFT_c2658/f1p0/5948|i4_LQ_LCRFT_c54267/f1p8…	http://www.genome.jp/kegg-bin/show_pathway?ko04626/K18835%09red/K12795%09red/K13414%09red/K13416%09red/K09487%09red/K13412%09red/K13413%09red/K13456%09red/K13457%09red/K13458%09red/K05391%09red/K13430%09red/K13436%09red/K13434%09red/K02183%09red/K13449%09red/K13448%09red/K13459%09red/K00864%09red/K13429%09red/K13428%09red/K04368%09red/K18875%09red/K04079%09red/K13447%09red/K13420%09red/K13425%09r…
Terpenoid backbone biosynthesis	0.288961	0.102059	89	ko00900	0.00212825	0.102059	i3_HQ_LCRFT_c67007/f10p0/2611|i1_HQ_LCRFT_c207536/f21p4/1857|i4_LQ_LCRFT_c56737/f1p16/3640|i2_LQ_LCRFT_c34869/f1p4/2723|i0_HQ_LCRFT_c11980/f2p2/902|i1_LQ_LCRFT_c22624/f1p3/1405|i2_LQ_LCRFT_c35426/f1p0/2219|i3_LQ_LCRFT_c24493/f1p0/2582|i3_HQ_LCRFT_c66982/f30p0/2597|i1_HQ_LCRFT_c19828/f3p8/1601|i3_LQ_LCRFT_c16391/f1p0/2060|i1_LQ_LCRFT_c170116/f1p0/1218|i3_LQ_LCRFT_c61796/f1p0/2713|i1_HQ_LCRFT_c8122…	http://www.genome.jp/kegg-bin/show_pathway?ko00900/K10960%09red/K05906%09red/K01662%09red/K01597%09red/K15889%09red/K00099%09red/K00938%09red/K05954%09red/K00869%09red/K06013%09red/K05356%09red/K00587%09red/K03526%09red/K13789%09red/K01770%09red/K01641%09red/K00021%09red/K00626%09red/K11778%09red
Glutathione metabolism	0.262609	0.102059	151	ko00480	0.00250966	0.102059	i0_LQ_LCRFT_c183007/f1p1/766|i3_LQ_LCRFT_c41364/f1p3/2336|i1_LQ_LCRFT_c59702/f1p1/2008|i0_HQ_LCRFT_c157175/f2p0/960|i3_LQ_LCRFT_c19169/f1p8/2591|i1_LQ_LCRFT_c205505/f84p11/1227|i1_LQ_LCRFT_c161726/f1p14/1339|i3_LQ_LCRFT_c94386/f1p8/2270|i1_LQ_LCRFT_c15336/f1p4/1104|i0_LQ_LCRFT_c341074/f1p0/889|i4_LQ_LCRFT_c66301/f1p0/3035|i1_LQ_LCRFT_c76480/f1p1/1930|i0_HQ_LCRFT_c395098/f42p0/863|i1_LQ_LCRFT_c144…	http://www.genome.jp/kegg-bin/show_pathway?ko00480/K01255%09red/K01256%09red/K00797%09red/K00432%09red/K00799%09red/K00383%09red/K00036%09red/K01469%09red/K00033%09red/K00434%09red/K00031%09red
Monoterpenoid biosynthesis	0.382353	0.145352	26	ko00902	0.00547554	0.145352	i2_HQ_LCRFT_c12969/f2p26/2629|i1_HQ_LCRFT_c80537/f4p3/1057|i4_LQ_LCRFT_c77571/f1p2/3729|i3_LQ_LCRFT_c78004/f1p3/2430|i1_LQ_LCRFT_c81557/f1p1/1049|i1_LQ_LCRFT_c163126/f1p0/1177|i1_LQ_LCRFT_c170706/f1p2/1946|i1_LQ_LCRFT_c179246/f1p3/1061|i4_LQ_LCRFT_c45680/f1p0/3289|i2_HQ_LCRFT_c11745/f3p0/2145|i1_LQ_LCRFT_c71575/f1p7/1839|i4_HQ_LCRFT_c71629/f2p0/3099|i1_HQ_LCRFT_c183160/f3p5/1225|i4_LQ_LCRFT_c7299…	http://www.genome.jp/kegg-bin/show_pathway?ko00902/K18108%09red/K15095%09red
Cutin, suberine and wax biosynthesis	0.271233	0.145352	99	ko00073	0.00595706	0.145352	i2_LQ_LCRFT_c3188/f1p6/2208|i3_LQ_LCRFT_c25157/f1p0/2621|i1_LQ_LCRFT_c119975/f1p7/1831|i1_LQ_LCRFT_c12288/f1p3/1529|i1_LQ_LCRFT_c42813/f1p0/1868|i1_LQ_LCRFT_c41275/f1p0/1447|i2_LQ_LCRFT_c117324/f1p212/2032|i1_LQ_LCRFT_c96482/f1p5/1604|i1_LQ_LCRFT_c194887/f1p2/1350|i1_LQ_LCRFT_c38778/f1p8/1869|i1_LQ_LCRFT_c193917/f1p5/1930|i2_LQ_LCRFT_c12248/f1p2/2516|i1_LQ_LCRFT_c181094/f1p0/1929|i2_HQ_LCRFT_c777…	http://www.genome.jp/kegg-bin/show_pathway?ko00073/K17991%09red/K13356%09red/K15400%09red/K15403%09red/K15404%09red
Sesquiterpenoid and triterpenoid biosynthesis	0.311258	0.149441	47	ko00909	0.00734954	0.149441	i1_LQ_LCRFT_c34912/f1p0/1939|i1_LQ_LCRFT_c98606/f1p0/1684|i4_LQ_LCRFT_c43854/f1p0/3718|i2_LQ_LCRFT_c111118/f1p0/2413|i1_LQ_LCRFT_c40206/f1p1/1870|i7_LQ_LCRFT_c128/f1p0/6601|i5_LQ_LCRFT_c5196/f1p0/4551|i1_HQ_LCRFT_c28214/f2p4/2000|i1_LQ_LCRFT_c98043/f1p0/1703|i2_LQ_LCRFT_c77153/f1p0/2136|i2_LQ_LCRFT_c38206/f1p1/2177|i2_LQ_LCRFT_c93347/f1p0/2121|i2_LQ_LCRFT_c73448/f1p22/2435|i2_LQ_LCRFT_c3470/f1p0/…	http://www.genome.jp/kegg-bin/show_pathway?ko00909/K00511%09red/K15813%09red/K15803%09red/K00801%09red
Carotenoid biosynthesis	0.282051	0.32219	55	ko00906	0.0188772	0.32219	i1_HQ_LCRFT_c57254/f2p1/1302|i3_LQ_LCRFT_c98363/f1p1/2798|i2_LQ_LCRFT_c64134/f1p0/2037|i0_LQ_LCRFT_c202968/f1p0/990|i1_LQ_LCRFT_c137917/f1p1/1204|i2_LQ_LCRFT_c60517/f1p0/2833|i3_LQ_LCRFT_c13506/f1p0/2391|i1_HQ_LCRFT_c93503/f2p8/1256|i5_LQ_LCRFT_c12435/f1p0/4541|i4_LQ_LCRFT_c28011/f1p0/3977|i3_LQ_LCRFT_c15920/f1p2/2061|i2_LQ_LCRFT_c14480/f1p0/2178|i2_LQ_LCRFT_c34951/f1p0/2892|i4_LQ_LCRFT_c4253/f1p…	http://www.genome.jp/kegg-bin/show_pathway?ko00906/K15746%09red/K09841%09red/K09842%09red/K09843%09red/K02291%09red/K02293%09red/K00514%09red/K09837%09red/K09840%09red/K06443%09red/K09838%09red/K09839%09red/K06444%09red/K15747%09red
Photosynthesis - antenna proteins	0.3	0.32219	39	ko00196	0.0211272	0.32219	i0_LQ_LCRFT_c254371/f2p0/1013|i1_HQ_LCRFT_c156821/f3p13/1179|i1_LQ_LCRFT_c166226/f1p111/1284|i1_LQ_LCRFT_c164810/f1p10/1588|i0_HQ_LCRFT_c243653/f40p0/978|i1_LQ_LCRFT_c113922/f1p12/1403|i0_HQ_LCRFT_c243752/f2p0/746|i1_LQ_LCRFT_c16328/f1p12/1186|i1_HQ_LCRFT_c158171/f59p8/1259|i1_LQ_LCRFT_c171149/f1p7/1207|i0_HQ_LCRFT_c67209/f3p0/1011|i1_LQ_LCRFT_c16612/f1p10/1118|i1_LQ_LCRFT_c198630/f1p3/1011|i1_LQ…	http://www.genome.jp/kegg-bin/show_pathway?ko00196/K08907%09red/K08908%09red/K08909%09red/K08915%09red/K08914%09red/K08917%09red/K08916%09red/K08910%09red/K08913%09red/K08912%09red
Glycolysis / Gluconeogenesis	0.229885	0.361293	260	ko00010	0.0294196	0.361293	i1_HQ_LCRFT_c208974/f3p5/1769|i2_HQ_LCRFT_c107368/f11p0/2514|i0_LQ_LCRFT_c282303/f1p0/584|i3_LQ_LCRFT_c23732/f1p0/2154|i1_LQ_LCRFT_c168271/f1p2/1901|i1_HQ_LCRFT_c3671/f2p4/1703|i3_LQ_LCRFT_c24819/f1p0/2322|i4_LQ_LCRFT_c25913/f1p0/3958|i1_HQ_LCRFT_c7492/f2p5/1418|i1_LQ_LCRFT_c25931/f1p9/1919|i3_LQ_LCRFT_c78965/f1p0/2654|i2_LQ_LCRFT_c103533/f1p0/2080|i4_LQ_LCRFT_c11573/f1p1/3177|i2_LQ_LCRFT_c63692/…	http://www.genome.jp/kegg-bin/show_pathway?ko00010/K00850%09red/K01689%09red/K01810%09red/K00895%09red/K18857%09red/K01623%09red/K14085%09red/K00873%09red/K00627%09red/K00134%09red/K00131%09red/K01835%09red/K01834%09red/K01895%09red/K03103%09red/K00844%09red/K01792%09red/K03841%09red/K01610%09red/K00927%09red/K01803%09red/K00161%09red/K00162%09red/K00128%09red/K01785%09red/K01568%09red/K00382%09r…
Tyrosine metabolism	0.262172	0.361293	70	ko00350	0.0312025	0.361293	i0_LQ_LCRFT_c84050/f1p0/958|i3_LQ_LCRFT_c78110/f1p0/2489|i2_LQ_LCRFT_c74414/f1p3/2186|i3_LQ_LCRFT_c71717/f1p0/2261|i1_LQ_LCRFT_c165098/f1p9/1889|i1_HQ_LCRFT_c185066/f70p13/1870|i1_HQ_LCRFT_c3671/f2p4/1703|i5_LQ_LCRFT_c4625/f1p0/4317|i2_HQ_LCRFT_c109284/f3p0/2827|i1_LQ_LCRFT_c140681/f1p9/1371|i1_LQ_LCRFT_c18802/f1p5/2002|i0_LQ_LCRFT_c201452/f1p0/507|i2_LQ_LCRFT_c59216/f1p0/2110|i1_LQ_LCRFT_c171518…	http://www.genome.jp/kegg-bin/show_pathway?ko00350/K00276%09red/K00817%09red/K14454%09red/K14455%09red/K01800%09red/K00457%09red/K15849%09red/K18857%09red/K00811%09red/K01592%09red/K01557%09red/K01555%09red/K07253%09red/K00121%09red/K00815%09red
Stilbenoid, diarylheptanoid and gingerol biosynthesis	0.311111	0.361293	28	ko00945	0.0325756	0.361293	i4_HQ_LCRFT_c21070/f3p2/3976|i1_LQ_LCRFT_c51148/f1p6/1817|i2_LQ_LCRFT_c79723/f1p0/2513|i4_LQ_LCRFT_c15806/f1p0/3049|i1_LQ_LCRFT_c38477/f1p17/2033|i2_HQ_LCRFT_c77286/f2p0/2942|i1_LQ_LCRFT_c41360/f1p2/1349|i1_HQ_LCRFT_c205948/f2p1/1912|i2_LQ_LCRFT_c12598/f1p0/2160|i1_LQ_LCRFT_c13917/f1p2/1819|i0_LQ_LCRFT_c84773/f1p1/917|i1_LQ_LCRFT_c25623/f1p0/1962|i4_HQ_LCRFT_c1895/f8p21/3916|i1_HQ_LCRFT_c85739/f1…	http://www.genome.jp/kegg-bin/show_pathway?ko00945/K16040%09red/K13065%09red/K09754%09red/K00588%09red/K00487%09red/K00517%09red
Phenylalanine metabolism	0.253012	0.380299	84	ko00360	0.0374065	0.380299	i3_LQ_LCRFT_c110530/f1p0/2491|i2_LQ_LCRFT_c44152/f1p0/2809|i2_LQ_LCRFT_c74414/f1p3/2186|i3_LQ_LCRFT_c71717/f1p0/2261|i3_LQ_LCRFT_c85388/f1p0/2036|i1_HQ_LCRFT_c185066/f70p13/1870|i3_LQ_LCRFT_c53147/f2p0/2610|i5_LQ_LCRFT_c4625/f1p0/4317|i2_HQ_LCRFT_c109284/f3p0/2827|i3_LQ_LCRFT_c47005/f1p0/2033|i1_LQ_LCRFT_c18802/f1p5/2002|i4_LQ_LCRFT_c57529/f1p0/3394|i4_LQ_LCRFT_c22838/f1p3/3392|i3_LQ_LCRFT_c99516…	http://www.genome.jp/kegg-bin/show_pathway?ko00360/K00276%09red/K14455%09red/K14454%09red/K00074%09red/K00815%09red/K00487%09red/K00817%09red/K15849%09red/K00811%09red/K01904%09red/K00457%09red/K07253%09red/K00588%09red/K01426%09red/K10775%09red
Plant hormone signal transduction	0.224676	0.426543	295	ko04075	0.0472227	0.426543	i2_LQ_LCRFT_c79715/f1p0/2669|i0_HQ_LCRFT_c32004/f2p0/594|i2_LQ_LCRFT_c40359/f1p7/2276|i2_LQ_LCRFT_c39976/f1p0/2794|i1_HQ_LCRFT_c6253/f2p4/1755|i1_LQ_LCRFT_c161827/f1p2/1662|i1_LQ_LCRFT_c27775/f1p16/1614|i2_LQ_LCRFT_c90496/f1p0/2842|i1_LQ_LCRFT_c75114/f1p5/1732|i2_HQ_LCRFT_c18109/f7p19/2156|i0_LQ_LCRFT_c336593/f1p0/958|i2_HQ_LCRFT_c119248/f10p13/2829|i2_LQ_LCRFT_c23305/f1p2/2200|i2_LQ_LCRFT_c39958…	http://www.genome.jp/kegg-bin/show_pathway?ko04075/K14486%09red/K14487%09red/K14484%09red/K14485%09red/K14488%09red/K14489%09red/K13946%09red/K13415%09red/K13416%09red/K14432%09red/K14431%09red/K14510%09red/K14513%09red/K14514%09red/K14515%09red/K14516%09red/K14494%09red/K14497%09red/K14496%09red/K14491%09red/K14490%09red/K14493%09red/K14492%09red/K14499%09red/K16189%09red/K14498%09red/K14506%09r…
Isoflavonoid biosynthesis	0.8	0.426543	4	ko00943	0.0489475	0.426543	i1_LQ_LCRFT_c99572/f1p6/1479|i1_LQ_LCRFT_c115558/f1p5/1381|i1_HQ_LCRFT_c66192/f20p5/1269|i1_LQ_LCRFT_c167746/f1p5/1186	http://www.genome.jp/kegg-bin/show_pathway?ko00943/K13262%09red
Phenylalanine, tyrosine and tryptophan biosynthesis	0.243523	0.458938	94	ko00400	0.0572221	0.458938	i2_HQ_LCRFT_c7771/f2p12/2895|i1_LQ_LCRFT_c18802/f1p5/2002|i4_HQ_LCRFT_c50821/f19p0/3153|i4_HQ_LCRFT_c24055/f2p4/3492|i2_HQ_LCRFT_c38897/f2p0/2176|i1_HQ_LCRFT_c58461/f2p1/1371|i1_LQ_LCRFT_c171518/f1p1/1469|i2_HQ_LCRFT_c43173/f2p0/2581|i4_HQ_LCRFT_c82740/f3p0/3035|i2_LQ_LCRFT_c66009/f1p0/2039|i4_LQ_LCRFT_c4499/f1p0/3523|i4_LQ_LCRFT_c24097/f1p2/3262|i3_LQ_LCRFT_c73580/f1p0/2943|i3_LQ_LCRFT_c86391/f1…	http://www.genome.jp/kegg-bin/show_pathway?ko00400/K01817%09red/K14455%09red/K14454%09red/K00800%09red/K01658%09red/K00891%09red/K01696%09red/K15849%09red/K01736%09red/K00811%09red/K13832%09red/K15227%09red/K01626%09red/K00817%09red/K01850%09red/K05359%09red/K01657%09red/K00815%09red
Non-homologous end-joining	0.321429	0.458938	18	ko03450	0.0612784	0.458938	i3_LQ_LCRFT_c40588/f1p0/2218|i5_LQ_LCRFT_c10446/f1p0/4769|i4_LQ_LCRFT_c18726/f1p0/3362|i4_LQ_LCRFT_c79221/f1p5/3820|i3_HQ_LCRFT_c86823/f8p0/2477|i1_LQ_LCRFT_c137965/f1p3/1742|i4_LQ_LCRFT_c62968/f1p1/3731|i4_LQ_LCRFT_c3744/f1p0/3898|i5_LQ_LCRFT_c3519/f1p0/4604|i1_LQ_LCRFT_c18927/f1p3/1450|i5_LQ_LCRFT_c7572/f1p0/4465|i2_LQ_LCRFT_c64819/f1p0/2062|i2_LQ_LCRFT_c66719/f1p0/2065|i3_LQ_LCRFT_c13938/f1p0/…	http://www.genome.jp/kegg-bin/show_pathway?ko03450/K10886%09red/K04799%09red/K10884%09red/K10866%09red/K10777%09red
Lysine degradation	0.238512	0.458938	109	ko00310	0.0639504	0.458938	i0_LQ_LCRFT_c282303/f1p0/584|i4_LQ_LCRFT_c4215/f1p2/3846|i4_LQ_LCRFT_c62478/f1p0/3569|i4_LQ_LCRFT_c45288/f1p0/3899|i3_LQ_LCRFT_c24819/f1p0/2322|i1_HQ_LCRFT_c206799/f3p0/1894|i2_LQ_LCRFT_c103533/f1p0/2080|i4_HQ_LCRFT_c2297/f4p0/3685|i4_LQ_LCRFT_c44641/f1p0/3586|i3_LQ_LCRFT_c5631/f1p2/2310|i5_LQ_LCRFT_c20459/f1p3/4749|i5_LQ_LCRFT_c15806/f1p0/4047|i2_LQ_LCRFT_c92904/f1p33/2940|i1_LQ_LCRFT_c26530/f1p…	http://www.genome.jp/kegg-bin/show_pathway?ko00310/K11423%09red/K00658%09red/K18826%09red/K00164%09red/K00306%09red/K14157%09red/K00128%09red/K11420%09red/K14085%09red/K00626%09red
Linoleic acid metabolism	0.253165	0.460256	60	ko00591	0.0679066	0.460256	i2_LQ_LCRFT_c22070/f1p0/2931|i4_LQ_LCRFT_c48927/f1p0/3038|i1_LQ_LCRFT_c142306/f1p49/2007|i5_LQ_LCRFT_c2244/f1p0/4733|i2_LQ_LCRFT_c39482/f1p0/2348|i4_LQ_LCRFT_c45192/f1p0/3401|i2_LQ_LCRFT_c74794/f1p13/2364|i3_LQ_LCRFT_c8545/f1p0/2854|i4_HQ_LCRFT_c10271/f5p0/3426|i2_LQ_LCRFT_c97973/f1p8/2775|i1_LQ_LCRFT_c171757/f1p16/1157|i0_LQ_LCRFT_c86849/f1p0/546|i4_HQ_LCRFT_c87341/f62p0/3226|i4_LQ_LCRFT_c53822/…	http://www.genome.jp/kegg-bin/show_pathway?ko00591/K14674%09red/K00454%09red/K15718%09red/K07418%09red
Mismatch repair	0.253456	0.472467	55	ko03430	0.0763793	0.472467	i1_LQ_LCRFT_c94402/f1p8/1896|i4_LQ_LCRFT_c29458/f1p0/3455|i5_LQ_LCRFT_c8214/f1p12/4133|i4_LQ_LCRFT_c42006/f1p0/3419|i4_LQ_LCRFT_c73269/f1p17/3324|i3_LQ_LCRFT_c53454/f1p6/2631|i4_LQ_LCRFT_c80071/f1p0/3123|i2_LQ_LCRFT_c65394/f1p0/2068|i4_LQ_LCRFT_c37499/f1p0/3114|i4_LQ_LCRFT_c38112/f1p0/3129|i4_LQ_LCRFT_c10032/f1p0/3367|i2_LQ_LCRFT_c74661/f1p5/2321|i4_LQ_LCRFT_c77013/f1p0/3581|i2_LQ_LCRFT_c8258/f1p…	http://www.genome.jp/kegg-bin/show_pathway?ko03430/K10756%09red/K08735%09red/K10747%09red/K10746%09red/K07456%09red/K10858%09red/K07466%09red/K08739%09red/K10754%09red/K03111%09red/K08736%09red/K08737%09red/K04802%09red/K10755%09red
Fatty acid elongation	0.260355	0.472467	44	ko00062	0.078899	0.472467	i4_LQ_LCRFT_c22099/f1p1/3097|i3_LQ_LCRFT_c126624/f1p0/2010|i1_HQ_LCRFT_c185952/f4p3/1062|i0_LQ_LCRFT_c53595/f1p0/593|i1_HQ_LCRFT_c80458/f8p7/1622|i3_LQ_LCRFT_c37432/f1p2/2769|i2_HQ_LCRFT_c48901/f3p0/2142|i2_HQ_LCRFT_c4818/f4p0/2917|i1_HQ_LCRFT_c2625/f18p1/1459|i1_LQ_LCRFT_c194177/f1p6/1205|i1_LQ_LCRFT_c203226/f1p2/1093|i0_LQ_LCRFT_c3784/f1p1/1008|i1_LQ_LCRFT_c151561/f1p1/1025|i3_HQ_LCRFT_c55215/f…	http://www.genome.jp/kegg-bin/show_pathway?ko00062/K01068%09red/K10703%09red/K01074%09red/K15397%09red/K10258%09red/K07512%09red/K10251%09red
