# Supplementary material for: <span aria-describedby="tippy-17">Transcriptomic and Metabolomic Profiling Provides Insights into Flavonoids Biosynthesis and Flower Coloring in <em>Loropetalum chinense</em> and <em>Loropetalum chinense</em> var. <em>rubrum</em>
Source: Preprints.org preprint supplement (doi:10.20944/preprints202304.0456.v1), 2023-04-18
Supplement: Supplementary file 29 [file supplementary table S34.xlsx]

## Sheet: Table S34 
Supplementary table S34 The KEGG enrichment analysis of DETs between XNXY VS LDPF group
pathway_term	rich_factor	qvalue	gene_number	ID	P-Value	Corrected P-Value	Input	Hyperlink
Fatty acid elongation	0.284024	0.000206964	48	ko00062	1.71045e-06	0.000206964	i3_LQ_LCRFT_c126624/f1p0/2010|i5_LQ_LCRFT_c14956/f1p2/4798|i2_LQ_LCRFT_c6503/f1p1/2687|i1_HQ_LCRFT_c19733/f5p0/1962|i1_HQ_LCRFT_c185952/f4p3/1062|i3_LQ_LCRFT_c58522/f1p3/2161|i3_LQ_LCRFT_c37432/f1p2/2769|i1_LQ_LCRFT_c203778/f1p1/1062|i2_HQ_LCRFT_c4818/f4p0/2917|i1_LQ_LCRFT_c118235/f1p6/1461|i1_HQ_LCRFT_c35189/f4p2/1264|i1_LQ_LCRFT_c203226/f1p2/1093|i1_HQ_LCRFT_c14702/f5p5/1890|i1_LQ_LCRFT_c151561…	http://www.genome.jp/kegg-bin/show_pathway?ko00062/K01068%09red/K10703%09red/K01074%09red/K15397%09red/K10258%09red/K10251%09red
Pentose and glucuronate interconversions	0.204409	0.000358571	102	ko00040	5.92679e-06	0.000358571	i4_LQ_LCRFT_c4215/f1p2/3846|i1_HQ_LCRFT_c1965/f5p3/1847|i2_HQ_LCRFT_c107147/f5p0/2239|i4_LQ_LCRFT_c57359/f1p3/3647|i4_HQ_LCRFT_c11020/f4p0/3962|i2_LQ_LCRFT_c98791/f1p0/2279|i4_LQ_LCRFT_c14372/f1p12/3330|i2_LQ_LCRFT_c92904/f1p33/2940|i2_LQ_LCRFT_c91681/f1p2/2813|i3_LQ_LCRFT_c84333/f1p0/2084|i1_LQ_LCRFT_c41153/f1p0/1713|i6_LQ_LCRFT_c1035/f1p0/5401|i1_HQ_LCRFT_c147813/f4p0/1097|i1_LQ_LCRFT_c163918/f…	http://www.genome.jp/kegg-bin/show_pathway?ko00040/K00854%09red/K01184%09red/K16190%09red/K00963%09red/K01213%09red/K01805%09red/K00008%09red/K00128%09red/K01051%09red/K01783%09red/K12447%09red/K00012%09red/K01728%09red
Phenylpropanoid biosynthesis	0.18652	0.00162365	119	ko00940	4.02557e-05	0.00162365	i1_HQ_LCRFT_c6525/f6p3/1743|i3_LQ_LCRFT_c53039/f1p0/2617|i4_LQ_LCRFT_c57529/f1p0/3394|i4_LQ_LCRFT_c22838/f1p3/3392|i0_LQ_LCRFT_c3727/f1p0/681|i1_LQ_LCRFT_c120629/f1p4/1850|i1_HQ_LCRFT_c17819/f15p4/1986|i1_LQ_LCRFT_c116498/f1p0/1704|i1_HQ_LCRFT_c66261/f2p6/1588|i3_LQ_LCRFT_c10565/f1p0/2609|i1_LQ_LCRFT_c3961/f1p3/1691|i3_LQ_LCRFT_c42353/f1p0/2432|i1_LQ_LCRFT_c34999/f1p8/1399|i0_LQ_LCRFT_c190205/f1p…	http://www.genome.jp/kegg-bin/show_pathway?ko00940/K00588%09red/K13065%09red/K10775%09red/K13066%09red/K01188%09red/K00083%09red/K12355%09red/K12356%09red/K05350%09red/K01904%09red/K09754%09red/K00430%09red/K05349%09red/K09753%09red
Histidine metabolism	0.212698	0.00239	67	ko00340	7.90083e-05	0.00239	i4_LQ_LCRFT_c7428/f1p0/3212|i4_LQ_LCRFT_c37197/f1p0/3072|i1_LQ_LCRFT_c40160/f1p11/2411|i1_HQ_LCRFT_c207690/f153p8/1843|i1_HQ_LCRFT_c148935/f3p2/1640|i3_LQ_LCRFT_c22391/f1p0/2303|i3_LQ_LCRFT_c94103/f1p1/2230|i4_LQ_LCRFT_c76085/f1p1/3162|i2_LQ_LCRFT_c24240/f1p0/2732|i2_HQ_LCRFT_c38180/f2p0/2606|i1_HQ_LCRFT_c41608/f2p5/1296|i1_LQ_LCRFT_c108806/f1p0/1628|i1_HQ_LCRFT_c87128/f23p1/1785|i2_LQ_LCRFT_c643…	http://www.genome.jp/kegg-bin/show_pathway?ko00340/K11755%09red/K14085%09red/K01693%09red/K00128%09red/K01590%09red/K00765%09red/K00013%09red
Photosynthesis - antenna proteins	0.261538	0.00475624	34	ko00196	0.000196539	0.00475624	i0_LQ_LCRFT_c254371/f2p0/1013|i1_HQ_LCRFT_c156821/f3p13/1179|i1_LQ_LCRFT_c164810/f1p10/1588|i1_LQ_LCRFT_c60462/f1p8/1223|i1_LQ_LCRFT_c194108/f1p10/1248|i1_LQ_LCRFT_c94057/f1p0/1145|i0_LQ_LCRFT_c13337/f1p1/804|i0_HQ_LCRFT_c243752/f2p0/746|i2_LQ_LCRFT_c22903/f1p0/2216|i1_HQ_LCRFT_c158171/f59p8/1259|i0_LQ_LCRFT_c199134/f1p6/790|i0_HQ_LCRFT_c67209/f3p0/1011|i1_LQ_LCRFT_c16612/f1p10/1118|i1_LQ_LCRFT_c…	http://www.genome.jp/kegg-bin/show_pathway?ko00196/K08909%09red/K08908%09red/K08914%09red/K08915%09red/K08907%09red/K08917%09red/K08916%09red/K08911%09red/K08910%09red/K08913%09red/K08912%09red
Tyrosine metabolism	0.213483	0.00476776	57	ko00350	0.000236418	0.00476776	i0_LQ_LCRFT_c84050/f1p0/958|i3_LQ_LCRFT_c78110/f1p0/2489|i3_LQ_LCRFT_c95737/f1p0/2777|i3_LQ_LCRFT_c36243/f1p0/2784|i1_HQ_LCRFT_c3671/f2p4/1703|i4_LQ_LCRFT_c10941/f1p0/3116|i0_LQ_LCRFT_c201452/f1p0/507|i2_LQ_LCRFT_c18054/f6p0/2152|i3_HQ_LCRFT_c26239/f5p4/2836|i2_LQ_LCRFT_c21640/f1p0/2250|i4_HQ_LCRFT_c34707/f3p0/3973|i2_LQ_LCRFT_c30236/f1p0/2036|i2_LQ_LCRFT_c96269/f1p12/2517|i1_LQ_LCRFT_c140135/f1p…	http://www.genome.jp/kegg-bin/show_pathway?ko00350/K00276%09red/K14455%09red/K14454%09red/K01800%09red/K00457%09red/K15849%09red/K18857%09red/K01592%09red/K00815%09red/K01555%09red/K07253%09red/K00121%09red/K00422%09red/K01557%09red
Isoquinoline alkaloid biosynthesis	0.24183	0.0067539	37	ko00950	0.000390722	0.0067539	i3_LQ_LCRFT_c71717/f1p0/2261|i1_LQ_LCRFT_c12763/f1p1/1491|i3_LQ_LCRFT_c36243/f1p0/2784|i4_LQ_LCRFT_c10941/f1p0/3116|i1_LQ_LCRFT_c3840/f1p0/1344|i1_HQ_LCRFT_c22586/f3p0/1645|i2_LQ_LCRFT_c18054/f6p0/2152|i3_HQ_LCRFT_c26239/f5p4/2836|i2_LQ_LCRFT_c21640/f1p0/2250|i1_LQ_LCRFT_c36907/f1p5/1793|i2_LQ_LCRFT_c30236/f1p0/2036|i2_HQ_LCRFT_c23644/f2p4/2955|i2_LQ_LCRFT_c16388/f1p0/2080|i3_LQ_LCRFT_c38106/f1p0…	http://www.genome.jp/kegg-bin/show_pathway?ko00950/K00276%09red/K14455%09red/K14454%09red/K15849%09red/K13384%09red/K13397%09red/K00815%09red/K01592%09red/K00422%09red
Fatty acid degradation	0.173267	0.0160586	105	ko00071	0.00106172	0.0160586	i4_LQ_LCRFT_c4215/f1p2/3846|i1_HQ_LCRFT_c3671/f2p4/1703|i2_LQ_LCRFT_c96421/f1p0/2866|i2_HQ_LCRFT_c118551/f35p0/2607|i3_HQ_LCRFT_c2085/f7p6/2600|i3_HQ_LCRFT_c9355/f3p0/2695|i5_LQ_LCRFT_c4878/f1p0/4241|i2_LQ_LCRFT_c6063/f1p4/2616|i2_LQ_LCRFT_c92904/f1p33/2940|i4_LQ_LCRFT_c77795/f1p0/3489|i1_LQ_LCRFT_c21088/f1p13/1680|i2_LQ_LCRFT_c91681/f1p2/2813|i3_LQ_LCRFT_c1159/f1p2/2611|i3_LQ_LCRFT_c43521/f1p17/…	http://www.genome.jp/kegg-bin/show_pathway?ko00071/K00249%09red/K18857%09red/K00128%09red/K00232%09red/K10527%09red/K14085%09red/K01897%09red/K00121%09red/K00626%09red
Sesquiterpenoid and triterpenoid biosynthesis	0.218543	0.0428692	33	ko00909	0.00318862	0.0428692	i1_LQ_LCRFT_c98606/f1p0/1684|i4_LQ_LCRFT_c43854/f1p0/3718|i2_LQ_LCRFT_c111118/f1p0/2413|i4_LQ_LCRFT_c73158/f1p0/3683|i6_LQ_LCRFT_c761/f1p0/5493|i1_LQ_LCRFT_c98043/f1p0/1703|i7_LQ_LCRFT_c128/f1p0/6601|i1_HQ_LCRFT_c60789/f2p8/1873|i3_LQ_LCRFT_c28501/f1p0/2170|i1_LQ_LCRFT_c96631/f1p77/2005|i1_LQ_LCRFT_c219266/f2p4/2105|i4_LQ_LCRFT_c14213/f1p1/3668|i3_LQ_LCRFT_c77366/f1p0/2158|i3_LQ_LCRFT_c11085/f1p0…	http://www.genome.jp/kegg-bin/show_pathway?ko00909/K00511%09red/K15813%09red/K15803%09red/K00801%09red/K14182%09red
Pyruvate metabolism	0.154659	0.0551809	161	ko00620	0.00465805	0.0551809	i1_HQ_LCRFT_c208974/f3p5/1769|i1_HQ_LCRFT_c21003/f3p3/1644|i4_LQ_LCRFT_c4215/f1p2/3846|i2_LQ_LCRFT_c72138/f1p1/2626|i1_HQ_LCRFT_c116186/f2p0/1240|i2_LQ_LCRFT_c63692/f1p0/2085|i5_LQ_LCRFT_c20014/f1p0/4515|i3_LQ_LCRFT_c23732/f1p0/2154|i2_LQ_LCRFT_c23723/f1p9/2219|i2_HQ_LCRFT_c118325/f3p0/2099|i2_LQ_LCRFT_c55327/f1p0/2940|i4_LQ_LCRFT_c57359/f1p3/3647|i4_LQ_LCRFT_c58154/f1p5/3828|i4_LQ_LCRFT_c78352/f…	http://www.genome.jp/kegg-bin/show_pathway?ko00620/K01649%09red/K14085%09red/K00873%09red/K11262%09red/K00627%09red/K00626%09red/K00051%09red/K00016%09red/K01069%09red/K01006%09red/K01679%09red/K01759%09red/K01595%09red/K01962%09red/K01961%09red/K01638%09red/K00161%09red/K00162%09red/K00128%09red/K00029%09red/K00028%09red/K00382%09red/K00025%09red/K00026%09red/K00102%09red/K01610%09red
Cutin, suberine and wax biosynthesis	0.178082	0.0551809	65	ko00073	0.00501645	0.0551809	i1_LQ_LCRFT_c194887/f1p2/1350|i0_LQ_LCRFT_c59981/f1p0/654|i3_LQ_LCRFT_c14230/f1p0/2261|i2_HQ_LCRFT_c5317/f2p0/2899|i2_LQ_LCRFT_c3188/f1p6/2208|i3_HQ_LCRFT_c120273/f2p1/2239|i2_LQ_LCRFT_c12978/f1p0/2221|i2_LQ_LCRFT_c40807/f1p8/2480|i2_HQ_LCRFT_c25231/f3p0/2805|i1_LQ_LCRFT_c95091/f1p29/1882|i3_LQ_LCRFT_c57204/f1p1/2309|i3_LQ_LCRFT_c55330/f1p1/2566|i1_HQ_LCRFT_c40522/f3p43/2054|i5_LQ_LCRFT_c21881/f1…	http://www.genome.jp/kegg-bin/show_pathway?ko00073/K13356%09red/K15398%09red/K15400%09red/K15403%09red/K15404%09red
Tryptophan metabolism	0.176309	0.0560342	64	ko00380	0.00643062	0.0560342	i3_LQ_LCRFT_c110530/f1p0/2491|i1_LQ_LCRFT_c40160/f1p11/2411|i1_HQ_LCRFT_c207690/f153p8/1843|i4_LQ_LCRFT_c62565/f1p0/3806|i3_LQ_LCRFT_c22103/f1p1/2434|i3_LQ_LCRFT_c99277/f1p18/2840|i3_LQ_LCRFT_c22391/f1p0/2303|i3_LQ_LCRFT_c94103/f1p1/2230|i3_LQ_LCRFT_c47005/f1p0/2033|i2_LQ_LCRFT_c24240/f1p0/2732|i1_LQ_LCRFT_c89478/f1p5/1610|i3_LQ_LCRFT_c66010/f1p18/2026|i2_LQ_LCRFT_c92904/f1p33/2940|i4_LQ_LCRFT_c1…	http://www.genome.jp/kegg-bin/show_pathway?ko00380/K03781%09red/K11816%09red/K00164%09red/K00128%09red/K14085%09red/K01426%09red/K00626%09red/K11820%09red
Synthesis and degradation of ketone bodies	0.271186	0.0560342	16	ko00072	0.00670241	0.0560342	i1_LQ_LCRFT_c89478/f1p5/1610|i4_LQ_LCRFT_c14768/f1p0/3763|i2_LQ_LCRFT_c14881/f1p0/2218|i1_HQ_LCRFT_c27645/f2p5/1594|i3_LQ_LCRFT_c76314/f1p0/2869|i1_HQ_LCRFT_c9314/f15p9/1785|i2_LQ_LCRFT_c102820/f1p0/2110|i1_HQ_LCRFT_c207536/f21p4/1857|i1_LQ_LCRFT_c70267/f1p3/1883|i1_LQ_LCRFT_c4370/f1p1/1841|i5_LQ_LCRFT_c14497/f1p1/4530|i2_LQ_LCRFT_c80409/f1p0/2167|i1_LQ_LCRFT_c139277/f1p10/1897|i1_HQ_LCRFT_c20462…	http://www.genome.jp/kegg-bin/show_pathway?ko00072/K01640%09red/K01641%09red/K00626%09red
Biosynthesis of unsaturated fatty acids	0.194313	0.0560342	41	ko01040	0.00674492	0.0560342	i4_LQ_LCRFT_c73968/f1p17/3240|i4_LQ_LCRFT_c22897/f1p16/3102|i0_HQ_LCRFT_c25544/f3p0/936|i1_HQ_LCRFT_c87141/f3p0/1516|i1_LQ_LCRFT_c116353/f1p3/1644|i3_LQ_LCRFT_c91747/f1p7/2196|i1_LQ_LCRFT_c203778/f1p1/1062|i2_HQ_LCRFT_c4818/f4p0/2917|i3_LQ_LCRFT_c56647/f1p1/2529|i1_HQ_LCRFT_c35189/f4p2/1264|i1_LQ_LCRFT_c203226/f1p2/1093|i0_LQ_LCRFT_c279167/f1p0/974|i1_LQ_LCRFT_c70596/f1p0/1264|i1_HQ_LCRFT_c118631…	http://www.genome.jp/kegg-bin/show_pathway?ko01040/K01068%09red/K00059%09red/K10703%09red/K00232%09red/K10258%09red/K10256%09red/K03921%09red/K10251%09red
Cyanoamino acid metabolism	0.178248	0.0560342	59	ko00460	0.00708565	0.0560342	i1_LQ_LCRFT_c161227/f1p5/1867|i1_HQ_LCRFT_c204760/f50p6/1728|i1_HQ_LCRFT_c6525/f6p3/1743|i3_LQ_LCRFT_c25491/f1p0/2657|i1_HQ_LCRFT_c40921/f2p4/1829|i1_LQ_LCRFT_c37963/f1p2/1971|i2_LQ_LCRFT_c77705/f1p0/2427|i3_LQ_LCRFT_c60626/f1p0/2127|i2_LQ_LCRFT_c90216/f1p1/2617|i1_LQ_LCRFT_c73314/f1p4/1701|i3_LQ_LCRFT_c126764/f1p9/2004|i1_LQ_LCRFT_c8697/f1p2/1889|i1_HQ_LCRFT_c108394/f4p3/1798|i5_LQ_LCRFT_c16117/…	http://www.genome.jp/kegg-bin/show_pathway?ko00460/K12153%09red/K01188%09red/K18592%09red/K00600%09red/K13029%09red/K05350%09red/K05349%09red
Glycosaminoglycan degradation	0.202381	0.0560342	34	ko00531	0.0076714	0.0560342	i3_LQ_LCRFT_c112147/f1p0/2115|i1_LQ_LCRFT_c21286/f1p5/1947|i2_LQ_LCRFT_c28426/f1p3/2933|i4_LQ_LCRFT_c45977/f1p0/3063|i3_LQ_LCRFT_c26658/f1p0/2125|i4_LQ_LCRFT_c27711/f1p0/3853|i2_HQ_LCRFT_c25624/f2p0/2180|i1_LQ_LCRFT_c38933/f1p3/1979|i4_LQ_LCRFT_c80431/f1p0/3290|i4_LQ_LCRFT_c74433/f1p4/3189|i1_LQ_LCRFT_c168617/f1p1/1507|i2_LQ_LCRFT_c94577/f1p0/2552|i3_LQ_LCRFT_c116538/f1p3/2066|i2_LQ_LCRFT_c3986/f…	http://www.genome.jp/kegg-bin/show_pathway?ko00531/K10532%09red/K07964%09red/K12309%09red/K12373%09red/K01205%09red
Fatty acid biosynthesis	0.174387	0.0560342	64	ko00061	0.00787258	0.0560342	i3_HQ_LCRFT_c2085/f7p6/2600|i2_HQ_LCRFT_c82305/f2p0/2087|i0_HQ_LCRFT_c25544/f3p0/936|i2_LQ_LCRFT_c96421/f1p0/2866|i1_LQ_LCRFT_c74760/f1p3/1812|i3_LQ_LCRFT_c54054/f1p0/2637|i2_LQ_LCRFT_c72138/f1p1/2626|i2_HQ_LCRFT_c118551/f35p0/2607|i4_LQ_LCRFT_c11914/f1p0/3650|i4_LQ_LCRFT_c47855/f1p0/3061|i1_LQ_LCRFT_c69297/f1p3/1727|i2_HQ_LCRFT_c119630/f5p0/2507|i2_LQ_LCRFT_c92928/f1p0/2541|i2_LQ_LCRFT_c21393/f1…	http://www.genome.jp/kegg-bin/show_pathway?ko00061/K10781%09red/K02372%09red/K10782%09red/K00648%09red/K00059%09red/K01962%09red/K01961%09red/K01897%09red/K11262%09red/K03921%09red/K09458%09red
Limonene and pinene degradation	0.193878	0.0610999	38	ko00903	0.00908924	0.0610999	i1_LQ_LCRFT_c40160/f1p11/2411|i1_HQ_LCRFT_c207690/f153p8/1843|i3_LQ_LCRFT_c22391/f1p0/2303|i3_LQ_LCRFT_c94103/f1p1/2230|i4_LQ_LCRFT_c76085/f1p1/3162|i2_LQ_LCRFT_c24240/f1p0/2732|i2_LQ_LCRFT_c64362/f1p0/2082|i3_LQ_LCRFT_c79680/f1p0/2128|i4_LQ_LCRFT_c4215/f1p2/3846|i1_LQ_LCRFT_c21088/f1p13/1680|i3_LQ_LCRFT_c94804/f1p59/2389|i1_LQ_LCRFT_c78390/f1p1/1843|i1_LQ_LCRFT_c162563/f1p12/1881|i4_LQ_LCRFT_c57…	http://www.genome.jp/kegg-bin/show_pathway?ko00903/K00128%09red/K00517%09red
Sphingolipid metabolism	0.175385	0.0669382	57	ko00600	0.0105109	0.0669382	i1_HQ_LCRFT_c54271/f5p3/1642|i4_LQ_LCRFT_c7052/f1p1/3487|i1_HQ_LCRFT_c43195/f5p1/1556|i1_LQ_LCRFT_c21286/f1p5/1947|i2_HQ_LCRFT_c119481/f13p0/2854|i1_LQ_LCRFT_c138832/f1p5/1913|i2_LQ_LCRFT_c89960/f2p0/2626|i4_LQ_LCRFT_c19803/f1p0/3557|i1_LQ_LCRFT_c36415/f1p0/1535|i1_LQ_LCRFT_c20162/f1p5/1946|i1_LQ_LCRFT_c164771/f1p2/1764|i1_LQ_LCRFT_c27102/f1p2/1769|i4_LQ_LCRFT_c19138/f1p1/3643|i1_HQ_LCRFT_c56179/…	http://www.genome.jp/kegg-bin/show_pathway?ko00600/K00654%09red/K04711%09red/K04713%09red/K12309%09red/K04710%09red/K07407%09red/K04708%09red/K17108%09red/K12349%09red
beta-Alanine metabolism	0.162447	0.0990312	77	ko00410	0.0163688	0.0990312	i1_LQ_LCRFT_c40160/f1p11/2411|i1_HQ_LCRFT_c207690/f153p8/1843|i3_HQ_LCRFT_c2154/f6p0/2916|i3_LQ_LCRFT_c36186/f1p0/2482|i1_LQ_LCRFT_c167180/f1p8/1961|i3_LQ_LCRFT_c27933/f1p0/2339|i3_LQ_LCRFT_c94103/f1p1/2230|i4_LQ_LCRFT_c76085/f1p1/3162|i2_LQ_LCRFT_c24240/f1p0/2732|i1_LQ_LCRFT_c59313/f1p8/1996|i2_LQ_LCRFT_c37692/f1p17/2910|i2_LQ_LCRFT_c18054/f6p0/2152|i3_HQ_LCRFT_c26239/f5p4/2836|i2_HQ_LCRFT_c1065…	http://www.genome.jp/kegg-bin/show_pathway?ko00410/K00249%09red/K00276%09red/K17839%09red/K05605%09red/K00140%09red/K00128%09red/K00207%09red/K01580%09red/K14085%09red/K13366%09red/K01918%09red
