# Supplementary material for: <span aria-describedby="tippy-17">Transcriptomic and Metabolomic Profiling Provides Insights into Flavonoids Biosynthesis and Flower Coloring in <em>Loropetalum chinense</em> and <em>Loropetalum chinense</em> var. <em>rubrum</em>
Source: Preprints.org preprint supplement (doi:10.20944/preprints202304.0456.v1), 2023-04-18
Supplement: Supplementary file 30 [file supplementary table S4.xlsx]

## Sheet: Table S4 
Supplementary table S4 The differential accumulated metabolites in group of LDPF VS XNFJ
Index	Compounds	Class	LDPF1	LDPF2	LDPF3	XNXY1	XNXY2	XNXY3	VIP	Fold_Change	LogFC
pma0249	Selgin 5-O-hexoside	Flavone	458000	488000	595000	1250000	970000	1510000	0.714186	2.42051	1.27531
pma0253	O-methylChrysoeriol 5-O-hexoside	Flavone	19900	21400	8610	396000	226000	248000	1.32063	17.4314	4.12361
pma0760	Selgin O-malonylhexoside	Flavone	19900	14800	17500	5640	4530	5340	0.857768	0.297126	-1.75085
pma0787	Quercetin-3-(6''-malonyl)-Glucoside	Flavonol	16200	25300	15800	46900	46400	46400	0.731764	2.43805	1.28572
pma1108	Apigenin C-glucoside	Flavone	2040	9	9	5660	6800	2040	1.4349	7.04568	2.81674
pma1116	Kaempferide	Flavonol	163000	68100	95700	9	9	9	2.39902	8.26193e-05	-13.5632
pma6218	O-methylnaringenin C-pentoside	Flavone	17300	20600	15000	11100	13400	21600	0.194725	0.871456	-0.198501
pma6389	Ayanin	Flavonol	11200	11300	11100	9020	9050	9850	0.330979	0.830952	-0.267162
pma6496	Luteolin 6-C-glucoside	Flavone	5000	9	9	7170	9	4550	0.681128	2.33739	1.2249
pma6558	Velutin	Flavone	27200	33600	27100	100000	50200	45500	0.611556	2.22639	1.15471
pma6576	Spinacetin	Flavone	207000	189000	188000	11700	12700	10100	1.32156	0.0590753	-4.0813
pma6638	O-methylChrysoeriol 7-O-hexoside	Flavone	27100	22400	12700	412000	233000	255000	1.27358	14.4695	3.85494
pma6639	Isorhamnetin O-hexoside	Flavonol	26000000	21300000	23600000	2450000	2110000	2330000	1.19828	0.0971791	-3.36321
pma6647	C-hexosyl-chrysoeriol O-hexoside	Flavone	15400	16700	11500	35200	46000	39100	0.780479	2.75917	1.46424
pmb0550	Cyanidin 3-O-glucoside (Kuromanin)	Anthocyanins	179000000	174000000	177000000	5330000	4190000	9470000	1.43951	0.0358302	-4.80268
pmb0563	Peonidin	Anthocyanins	164000	92000	99700	9	9	9	2.41489	7.59067e-05	-13.6854
pmb0565	Syringetin 3-O-hexoside	Flavonol	265000	215000	251000	12300	12500	9540	1.37322	0.0469767	-4.41191
pmb0566	Luteolin O-hexosyl-O-pentoside	Flavone	59400	57600	49600	80700	77600	64900	0.392587	1.33974	0.421949
pmb0576	Apigenin O-malonylhexoside	Flavone	18000	15400	15100	17200	15900	3910	0.34576	0.763093	-0.39007
pmb0580	Chrysin 5-O-glucoside (Toringin)	Flavone	517000	472000	574000	144000	139000	81300	0.942087	0.233077	-2.10112
pmb0588	Luteolin 3',7-di-O-glucoside	Flavone	799000	724000	737000	1660000	1660000	1660000	0.697991	2.20354	1.13982
pmb0592	Chrysoeriol O-hexosyl-O-rutinoside	Flavone	27600	28100	27000	33400	32600	31700	0.316556	1.18138	0.240471
pmb0595	Isorhamnetin 5-O-hexoside	Flavonol	4740000	3760000	4250000	527000	412000	479000	1.16245	0.111216	-3.16857
pmb0602	Syringetin 7-O-hexoside	Flavone	12000000	10500000	11300000	687000	600000	757000	1.31594	0.0604734	-4.04756
pmb0604	Kaempferol 3-O-glucoside (Astragalin)	Flavonol	11500000	11400000	11200000	10400000	10700000	10600000	0.207278	0.929619	-0.105289
pmb0618	8-C-hexosyl-hesperetin O-hexoside	Flavone	30500000	33200000	27800000	25900000	29000000	32000000	0.100922	0.949727	-0.0744156
pmb0622	C-hexosyl-luteolin O-hexoside	Flavone	9	9	9	1760	1290	2970	1.81327	222.963	7.80066
pmb0624	6-C-hexosyl-luteolin O-hexoside	Flavone	60700	59800	76200	106000	93600	97800	0.488527	1.51195	0.596408
pmb0628	Eriodictiol C-hexosyl-O-hexoside	Flavone	1830000	1780000	1890000	2480000	2620000	2240000	0.409476	1.33455	0.416348
pmb0629	Chrysoeriol 6-C-hexoside	Flavone	11400	11000	15500	9	9	9	2.11317	0.000712401	-10.455
pmb0645	6-C-hexosyl-hesperetin O-hexoside	Flavone	7210000	7100000	7750000	8360000	7430000	7400000	0.116871	1.05122	0.07207
pmb0647	8-C-hexosyl-luteolin O-pentoside	Flavone	13200	7900	13400	20200	18000	14000	0.439795	1.51304	0.597453
pmb0653	di-C,C-hexosyl-apigenin	Flavone	9	9	5990	9	9	9	0.773025	0.00449401	-7.79778
pmb0660	C-hexosyl-luteolin O-p-coumaroylhexoside	Flavone	8760	5850	7970	10100	11900	8920	0.38334	1.36935	0.453495
pmb0663	8-C-hexosyl-luteolin O-hexoside	Flavone	52100	41800	34500	45600	52300	34600	0.0424189	1.03193	0.0453472
pmb0665	Luteolin 8-C-hexosyl-O-hexoside	Flavone	48400	61500	53200	2180000	1930000	2090000	1.49871	38.0135	5.24844
pmb0689	Chrysoeriol C-hexoside	Flavone	13800	12800	12200	8090	7700	16200	0.268365	0.824485	-0.278436
pmb0696	8-C-hexosyl chrysoeriol O-hexoside	Flavone	7190000	4340000	6020000	9	9	9	2.87221	1.53846e-06	-19.3101
pmb0711	Quercetin 7-O-rutinoside	Flavonol	1110000	1380000	1410000	42500000	41100000	43500000	1.46708	32.5897	5.02635
pmb0713	Tricin 7-O-hexosyl-O-hexoside	Flavone	158000	111000	134000	9	9	9	2.43449	6.69975e-05	-13.8655
pmb0724	Tricin O-rhamnoside	Flavone	388000	389000	342000	297000	242000	272000	0.427231	0.724754	-0.464436
pmb0725	Tricin 7-O-feruloylhexoside	Flavone	10900	11200	10300	16400	12700	16400	0.425648	1.40432	0.489873
pmb0732	Tricin 5-O-feruloylhexoside	Flavone	17500	22000	16200	26200	31700	35500	0.535464	1.67684	0.745745
pmb0739	Tricin O-hexosyl-O-syringin alcohol	Flavone	135000	136000	205000	221000	232000	222000	0.426746	1.41807	0.503926
pmb0746	Tricin 4'-O-β-guaiacylglycerol	Flavone	5090	5240	5580	4430	4060	5450	0.228282	0.876179	-0.190703
pmb0835	Gallocatechin-gallocatechin	Polyphenol	22000000	16700000	27000000	597000	489000	445000	1.51835	0.0233029	-5.42335
pmb2831	Protocatechuic acid O-glucoside	Polyphenol	3820000	3770000	3670000	3750000	4300000	5020000	0.237578	1.16075	0.215052
pmb2850	Tricin	Flavone	93400	74000	63100	805000	916000	734000	1.20749	10.6508	3.41288
pmb2947	Catechin-catechin-catechin	Polyphenol	650000	638000	553000	721000	702000	640000	0.21929	1.12059	0.164254
pmb2957	Cyanidin O-syringic acid	Anthocyanins	23900000	17700000	26200000	149000	122000	307000	1.72081	0.00852507	-6.87407
pmb2975	Hesperetin O-Glucuronic acid	Flavanone	41600	28300	44500	9	9	9	2.26762	0.000236014	-12.0488
pmb2979	Hesperetin O-malonylhexoside	Flavanone	111000	104000	85100	470000	473000	415000	0.96354	4.52516	2.17797
pmb2983	Chrysoeriol C-pentosyl-O-rhamnosyl-rhamnoside	Flavone	1250	1160	1090	4970	5000	4760	0.941722	4.20857	2.07333
pmb2987	Acacetin O-acetyl hexoside	Flavone	35600	34300	39600	48100	40100	44900	0.313012	1.21553	0.28158
pmb2992	Acacetin O-glucuronic acid	Flavone	4440	1700	2420	9	9	9	1.86773	0.00315421	-8.30851
pmb2999	Chrysoeriol 5-O-hexoside	Flavone	51200	79600	79000	130000	149000	114000	0.593295	1.87321	0.905515
pmb3006	Apigenin 7-O-glucoside (Cosmosiin)	Flavone	67400	66100	51200	52600	38700	49000	0.353608	0.75961	-0.396669
pmb3013	Isorhamnetin O-acetyl-hexoside	Flavonol	32700	16900	24900	5950	7850	9560	0.806692	0.313557	-1.6732
pmb3014	Luteolin O-eudesmic acid-O-hexoside	Flavone	13100	9980	9950	72500	65800	74200	1.07143	6.43355	2.68561
pmb3023	Eriodictyol C-hexoside	Flavone	4540000	4330000	4690000	5300000	5170000	4350000	0.16932	1.09292	0.128188
pmb3026	Quercetin O-acetylhexoside	Flavonol	404000	419000	334000	305000	292000	209000	0.428211	0.696629	-0.521537
pmb3037	Tricin O-malonyl shikimic acid	Flavone	4560	5350	6380	908	1510	1310	0.944501	0.228852	-2.12751
pmb3041	Tricin O-saccharic acid	Flavone	1250000	1320000	1090000	2580000	3180000	2560000	0.702862	2.27322	1.18474
pmb3046	Tricin 7-O-hexoside	Flavone	29900	24300	26500	50800	56100	62800	0.669101	2.10285	1.07235
pmb3047	Tricin 4'-O-(syringyl alcohol) ether 5-O-hexoside	Flavone	97900	93400	88900	41400	41200	36900	0.723526	0.426481	-1.22945
pmb3114	Epicatechin-epiafzelechin	Polyphenol	46900	42900	45300	94500	88600	76000	0.625351	1.91784	0.939481
pmb3894	Di-O-methylquercetin	Flavonol	108000	104000	70600	337000	298000	308000	0.857111	3.33687	1.7385
pmc1990	4'-Hydroxy-5,7-dimethoxyflavanone	Flavanone	2140000	2060000	2100000	1590000	1320000	1660000	0.429542	0.725397	-0.463158
pme0001	Hesperetin 7-O-neohesperidoside (Neohesperidin)	Flavanone	226000	450000	176000	1040000	835000	711000	0.804654	3.03521	1.6018
pme0088	Luteolin	Flavone	98500	79400	64300	213000	204000	224000	0.768878	2.64657	1.40413
pme0197	Quercetin 3-O-rutinoside (Rutin)	Flavonol	593000	650000	625000	14100000	12900000	12600000	1.37279	21.1991	4.40593
pme0200	Kaempferol	Flavonol	7920000	9710000	5200000	60000000	63800000	57100000	1.13012	7.92378	2.98619
pme0205	Catechin	Polyphenol	935000	639000	610000	5750000	4520000	5110000	1.09546	7.04212	2.81601
pme0208	Amentoflavone	Flavone	82300	71900	47600	164000	150000	147000	0.698983	2.28444	1.19184
pme0324	Chrysin	Flavone	11500	3590	8950	6660	6500	4140	0.209428	0.719634	-0.474665
pme0333	Apigenin 7-O-neohesperidoside (Rhoifolin)	Flavone	67700	67500	48700	272000	277000	253000	0.951621	4.36107	2.12468
pme0355	Daidzein	Isoflavone	76300	97400	89200	28800	16700	20000	0.920225	0.249144	-2.00495
pme0361	Quercetin 3-alpha-L-arabinofuranoside (Avicularin)	Flavonol	25900000	24600000	25300000	23300000	21700000	20900000	0.278924	0.869393	-0.201919
pme0363	Chrysoeriol	Flavone	152000	22700	29400	88100	73100	109000	0.433814	1.32386	0.404751
pme0369	Kaempferol 3-O-rutinoside (Nicotiflorin)	Flavonol	391000	358000	378000	5790000	5750000	5170000	1.28993	14.827	3.89015
pme0372	Naringenin 7-O-glucoside (Prunin)	Flavanone	3790000	167000	9	14100000	8520000	15800000	1.61056	9.70935	3.27938
pme0376	Naringenin	Flavanone	819000	742000	750000	665000	610000	663000	0.312849	0.838598	-0.253949
pme0379	Apigenin	Flavone	49300	41500	29900	150000	180000	144000	0.912458	3.92709	1.97346
pme0431	Procyanidin A1	Proanthocyanidins	25200	21500	27200	65000	86600	75600	0.824936	3.07442	1.62032
pme0434	Procyanidin B2	Proanthocyanidins	5150000	4230000	4820000	10100000	8490000	8180000	0.613983	1.88521	0.914726
pme0436	Procyanidin B3	Proanthocyanidins	5330000	4650000	4910000	10200000	9220000	8920000	0.625642	1.90329	0.928496
pme0442	Delphinidin	Anthocyanins	282000	189000	290000	201000	318000	191000	0.0925486	0.932983	-0.100077
pme0450	L-Epicatechin	Polyphenol	14700000	13300000	13200000	40800000	38300000	36000000	0.794608	2.79369	1.48217
pme1201	Phloretin	Flavanone	295000	349000	342000	445000	432000	401000	0.381684	1.29615	0.374228
pme1398	Delphinidin 3-O-glucoside (Mirtillin)	Anthocyanins	56000000	45600000	51000000	231000	153000	301000	1.83032	0.00448886	-7.79944
pme1478	Myricetin	Flavonol	12400000	14300000	11000000	15400000	17600000	11200000	0.198036	1.17241	0.229482
pme1486	Epigallate catechin gallate (EGCG)	Polyphenol	50600000	44500000	44500000	40000000	38000000	47600000	0.193317	0.899713	-0.152462
pme1500	Kumatakenin	Flavonol	31700	40400	25800	75200	58100	39300	0.509693	1.76302	0.818052
pme1506	Kaempferol 7-O-rhamnoside	Flavonol	5780000	4950000	5580000	7950000	8000000	8040000	0.482854	1.47088	0.556676
pme1510	Baicalein (5,6,7-Trihydroxyflavone)	Flavone	20500	9760	6480	15600	12700	14800	0.249457	1.17311	0.230336
pme1514	Epigallocatechin (EGC)	Polyphenol	9540000	7760000	7530000	8240000	6710000	7620000	0.159125	0.908981	-0.137678
pme1518	Nobiletin	Flavone	28100	19800	16700	94200	106000	60200	0.902839	4.03096	2.01112
pme1521	Dihydroquercetin (Taxifolin)	Flavonol	441000	400000	418000	2170000	1480000	1580000	0.926228	4.15409	2.05453
pme1535	(+)-Gallocatechin (GC)	Polyphenol	5660000	4870000	4900000	4410000	4410000	4630000	0.257052	0.871679	-0.198132
pme1539	Isorhamnetin 3-O-neohesperidoside	Flavonol	743000	864000	951000	363000	336000	447000	0.692435	0.448006	-1.15841
pme1541	Acacetin	Flavone	101000	43000	57900	165000	132000	140000	0.660961	2.16444	1.11399
pme1550	Tangeretin	Flavone	18500	10500	8060	72700	73300	42500	0.980728	5.08635	2.34663
pme1552	Myricetin 3-O-rhamnoside (Myricitrin)	Flavonol	6660000	7730000	6970000	1720000	1680000	1710000	0.93844	0.239232	-2.06352
pme1562	Epicatechin gallate (ECG)	Polyphenol	14600000	13500000	11600000	46200000	47000000	47100000	0.882053	3.53401	1.8213
pme1568	Orobol (5,7,3',4'-tetrahydroxyisoflavone)	Isoflavone	15900	10700	10700	56700	47100	59900	0.950496	4.38874	2.13381
pme1580	Eriodictyol	Flavanone	1980000	1120000	1610000	14700000	9800000	11400000	1.11261	7.62208	2.93018
pme1588	Isorhamnetin	Flavonol	5240000	5770000	3210000	11000000	12700000	9970000	0.70855	2.36779	1.24354
pme1598	Hesperetin 5-O-glucoside	Flavanone	3140000	2960000	2720000	2280000	2070000	2690000	0.336098	0.798186	-0.325203
pme1599	7-O-Methyleriodictyol	Flavanone	359000	149000	186000	645000	602000	638000	0.770958	2.71614	1.44156
pme1605	Kaempferol 3-O-robinobioside (Biorobin)	Flavonol	367000	402000	375000	6060000	5830000	5380000	1.29415	15.0962	3.91611
pme1611	Isohemiphloin	Flavone	439000	335000	384000	276000	321000	252000	0.396754	0.733161	-0.447799
pme1624	Isovitexin	Flavone	2950	1560	9	4110	3520	6250	0.950522	3.07148	1.61893
pme1662	sakuranetin	Flavone	6810	6930	4220	6560	6200	7750	0.194031	1.14198	0.19154
pme1773	Cyanidin 3-O-rutinoside (Keracyanin)	Anthocyanins	91100	100000	76700	313000	260000	259000	0.830748	3.1068	1.63543
pme1777	Cyanidin 3,5-O-diglucoside (Cyanin)	Anthocyanins	22700000	16900000	25600000	444000	381000	345000	1.57176	0.0179448	-5.80029
pme1793	Pelargonin	Anthocyanins	1660000	1400000	1890000	93500	122000	97100	1.30321	0.0631515	-3.98504
pme1824	Protocatechuic acid	Polyphenol	568000	535000	468000	1490000	1340000	1800000	0.807959	2.94717	1.55933
pme2247	Ellagic acid	Polyphenol	261000	248000	288000	193000	137000	162000	0.526611	0.617315	-0.695921
pme2319	Hesperetin	Flavanone	27400	17100	21900	77000	72600	67900	0.851066	3.2756	1.71176
pme2457	Luteolin 7-O-glucoside (Cynaroside)	Flavone	113000	132000	143000	47500	59000	39400	0.76661	0.376031	-1.41108
pme2478	Protocatechuic aldehyde	Polyphenol	42800	40700	40100	48000	57500	54000	0.377813	1.29045	0.367878
pme2493	Kaempferol 3,7-dirhamnoside (Kaempferitrin)	Flavonol	129000	140000	126000	589000	531000	550000	0.942535	4.22785	2.07992
pme2898	Dihydromyricetin	Flavonol	872000	1130000	807000	1010000	969000	895000	0.0534514	1.02314	0.0330034
pme2949	Hesperetin 7-rutinoside (Hesperidin)	Flavanone	243000	273000	170000	1230000	948000	649000	0.905775	4.12099	2.04299
pme2954	Quercetin	Flavonol	7470000	8960000	5690000	47200000	51600000	41400000	1.06491	6.33816	2.66406
pme2957	Naringenin chalcone	Flavanone	1380000	1230000	1200000	1130000	952000	1140000	0.281458	0.845669	-0.241835
pme2963	Aromadedrin (Dihydrokaempferol)	Flavonol	746000	662000	832000	1590000	1570000	1440000	0.661681	2.05357	1.03814
pme2982	Pinocembrin (Dihydrochrysin)	Flavanone	32800	22400	56600	18500	17400	15300	0.589023	0.457961	-1.1267
pme2984	Isosakuranetin-7-neohesperidoside (Poncirin)	Flavanone	6410000	6520000	6900000	4080000	3980000	3870000	0.558512	0.601614	-0.733091
pme3130	Quercetin 4'-O-glucoside (Spiraeoside)	Flavonol	4770000	4390000	4570000	4500000	4340000	4310000	0.127227	0.957757	-0.0622688
pme3208	Glycitin	Isoflavone	9	9	9	10200	8180	7900	2.05998	973.333	9.92679
pme3211	Quercetin 3-O-glucoside (Isotrifoliin)	Flavonol	2920000	2850000	2810000	2270000	2070000	2250000	0.398844	0.768065	-0.380699
pme3215	Isoliquiritigenin	Flavanone	3970	4350	3520	4590	4230	3650	0.0919104	1.05321	0.0747924
pme3268	Kaempferol 3-O-galactoside (Trifolin)	Flavonol	6840000	7170000	6790000	6600000	6610000	6400000	0.173307	0.942788	-0.084994
pme3276	2'-Hydroxygenistein	Isoflavone	7630	11300	6300	10600	10100	18800	0.414284	1.5656	0.646712
pme3285	Afzelechin (3,5,7,4'-Tetrahydroxyflavan)	Flavanone	9	9	9	9540	10600	6820	2.06186	998.519	9.96365
pme3288	3,7-Di-O-methylquercetin	Flavonol	8850	7920	9990	3680	6230	7890	0.438182	0.665172	-0.588201
pme3292	Prunetin	Isoflavone	92600	41800	57100	156000	126000	133000	0.663413	2.1671	1.11577
pme3296	Kaempferol 3-O-rhamnoside (Kaempferin)	Flavonol	27800000	27700000	27800000	31900000	30000000	31100000	0.253808	1.11645	0.158914
pme3303	Tricetin	Flavone	2620000	3470000	2990000	5870000	5910000	4630000	0.583692	1.80727	0.853811
pme3369	Rhamnetin (7-O-methxyl quercetin)	Flavonol	40000	53400	40300	90300	92700	170000	0.720424	2.64024	1.40067
pme3391	Petunidin 3-O-glucoside	Anthocyanins	4440000	4120000	6800000	9	9	9	2.85746	1.75781e-06	-19.1178
pme3392	Pelargonidin 3-O-beta-D-glucoside（Callistephin chloride)	Anthocyanins	5370000	4710000	5960000	92300	82400	113000	1.57523	0.0179364	-5.80097
pme3399	Sissotrin	Isoflavone	165000	147000	106000	235000	196000	341000	0.552862	1.84689	0.885098
pme3401	Syringetin	Flavonol	447000	448000	306000	348000	431000	340000	0.0874523	0.931724	-0.102026
pme3407	Laricitrin	Flavonol	567000	536000	451000	147000	135000	116000	0.912617	0.256113	-1.96515
pme3442	Quercetin 7-O-β-D-Glucuronide	Flavonol	236000	245000	228000	228000	263000	226000	0.0223321	1.01128	0.0161875
pme3461	Homoeriodictyol	Flavanone	264000	269000	105000	4720000	4020000	2450000	1.32027	17.5392	4.13251
pme3464	Isosakuranetin (4'-Methylnaringenin)	Flavanone	146000	29400	41900	81300	57900	104000	0.253418	1.11919	0.162455
pme3473	Butin	Flavone	1220000	1290000	1230000	1100000	1110000	1100000	0.26898	0.885027	-0.176207
pme3484	Myricetin 3-O-galactoside	Flavonol	28500000	29100000	32400000	8230000	8430000	8520000	0.885436	0.279778	-1.83765
pme3502	Formononetin 7-O-glucoside (Ononin)	Isoflavone	14800	14100	10600	53400	78000	64200	0.985098	4.9519	2.30798
pme3509	7,4'-Dihydroxyflavone	Flavone	42200	50700	60200	10700	8360	12300	0.981475	0.204833	-2.28748
pme3514	Morin	Flavonol	667000	827000	453000	3080000	3320000	2510000	0.961251	4.57627	2.19417
pme3609	Cyanidin	Anthocyanins	146000	111000	97100	9	9	9	2.41741	7.62496e-05	-13.6789
pmf0011	Apigenin 6,8-C-diglucoside	Flavone	2260	1970	1790	9	9	9	1.82619	0.00448505	-7.80066
pmf0012	6,8-di-C-glucoside Apigenine	Flavone	27600	25100	20900	18900	17400	16100	0.425183	0.711957	-0.490139
pmf0027	Cyanidin 3-O-galactoside	Anthocyanins	9470000	7880000	10400000	146000	140000	283000	1.55296	0.0205045	-5.60792
pmf0057	4,2',4',6'-Tetrahydroxychalcone	Flavone	867000	792000	842000	2040000	1900000	1740000	0.708142	2.27109	1.18339
pmf0058	4',5,7-Trihydroxyflavanone	Flavanone	981000	891000	965000	2360000	2100000	1990000	0.707842	2.27353	1.18493
pmf0109	3-O-Acetylpinobanksin	Flavonoid	124000	40300	124000	104000	113000	64200	0.0579686	0.975373	-0.0359742
pmf0115	Galangin	Flavonoid	7790	7150	14000	33100	39100	27200	0.857713	3.43469	1.78018
pmf0179	Narcissoside	Flavonoid	2750000	2740000	3100000	2140000	2680000	2720000	0.224428	0.877765	-0.188094
pmf0204	Hyperoside	Flavonoid	5320000	5280000	5750000	5000000	4930000	5040000	0.213245	0.915596	-0.127216
pmf0208	Isoquercitroside	Flavonoid	5430000	5430000	5260000	5480000	5130000	5440000	0.0172366	0.995658	-0.00627845
pmf0216	Catechin gallate，CG	Polyphenol	419000	353000	302000	2000000	1860000	1820000	1.01317	5.28864	2.4029
pmf0233	Tiliroside	Flavonoid	36000000	33900000	34800000	19300000	21600000	22900000	0.547873	0.60936	-0.714633
pmf0238	Theaflavin-3-gallate	Polyphenol	55000	68500	55700	67000	55200	71700	0.128182	1.08203	0.113742
pmf0240	Theaflavin	Polyphenol	57200	65800	55200	67900	57900	66900	0.150227	1.08137	0.112859
pmf0246	Orientin	Flavonoid	71900	60800	71000	23200	24200	27200	0.783133	0.366225	-1.4492
pmf0260	Sinensetin	Flavonoid	934	1490	1080	2440	2050	4480	0.688718	2.55993	1.35611
pmf0265	5,7-Dihydroxychromone	Flavonoid	17300	6170	8830	38200	33500	31400	0.833314	3.19195	1.67444
pmf0274	Herbacetin	Flavonoid	651000	858000	492000	2770000	3130000	2770000	0.94757	4.33283	2.11531
pmf0279	Gossypitrin	Flavonoid	40200000	40000000	40700000	38800000	39100000	37100000	0.160097	0.951199	-0.0721804
pmf0302	Engeletin	Flavonoid	1000000	1130000	1050000	1680000	1570000	1650000	0.512424	1.54088	0.623755
pmf0330	Spinosin	Flavonoid	5460	3450	5580	20400	21600	28700	0.980056	4.87923	2.28665
pmf0344	(-)-Epiafzelechin	Polyphenol	4010	3790	2540	40900	35000	33500	1.20573	10.5803	3.4033
pmf0361	Astilbin	Flavonoid	1180000	1180000	1070000	2070000	2210000	1970000	0.605107	1.82216	0.865648
pmf0362	Hydroxygenkwanin	Flavonoid	5660	4240	2310	50600	42500	46900	1.22907	11.466	3.51929
pmf0369	Persicoside	Flavonoid	452000	254000	405000	13500	9500	13400	1.4437	0.0327633	-4.93178
pmf0371	Pedalitin	Flavonoid	2480000	2520000	2420000	5320000	6490000	4900000	0.697656	2.25202	1.17122
pmf0374	Isorhamnetin 3-O-glucoside	Flavonoid	48500000	35100000	50900000	1910000	1780000	2010000	1.39229	0.0423792	-4.5605
pmf0379	Gallocatechin gallate	Polyphenol	2620000	2240000	1850000	1920000	1750000	2010000	0.239848	0.846498	-0.240422
pmf0382	5,7-Dihydroxy-3',4',5'-trimethoxyflavone	Flavonoid	6700	4880	9680	7000	6020	6160	0.0804715	0.902164	-0.148539
pmf0392	Persicogenin	Flavonoid	3950	9	1530	4270	3630	5220	0.905069	2.39024	1.25715
pmf0458	6-Gingerol	Polyphenol	856000	637000	675000	884000	1240000	1130000	0.456494	1.50092	0.585849
pmf0550	Diosmin	Flavonoid	73700	67100	8520	53900	53800	9	0.762462	0.72133	-0.471269
pmf0567	Tectorigenin	Flavonoid	1410	1040	2070	2160	9	9	1.15667	0.481858	-1.05332
pmf0583	Phloridzin	Flavonoid	2780000	2800000	2770000	2790000	2810000	2710000	0.025212	0.99521	-0.00692772
pmf0615	Petunidin 3, 5-diglucoside	Anthocyanins	11300000	9970000	10800000	122000	72600	102000	1.70274	0.00924852	-6.75656
pmf0617	Peonidin 3-sophoroside-5-glucoside.	Anthocyanins	5010	3380	3800	9	9	9	1.93978	0.00221493	-8.81852
