# Supplementary material for: <span aria-describedby="tippy-17">Transcriptomic and Metabolomic Profiling Provides Insights into Flavonoids Biosynthesis and Flower Coloring in <em>Loropetalum chinense</em> and <em>Loropetalum chinense</em> var. <em>rubrum</em>
Source: Preprints.org preprint supplement (doi:10.20944/preprints202304.0456.v1), 2023-04-18
Supplement: Supplementary file 31 [file supplementary table S5.xlsx]

## Sheet: Table S5 
Supplementary table S5 The differential accumulated metabolites in group of XNNC VS XNFJ
Index	Compounds	Class	XNNC1	XNNC2	XNNC3	XNFJ1	XNFJ2	XNFJ3	VIP	Fold_Change	LogFC
pma0249	Selgin 5-O-hexoside	Flavone	3450000	3640000	5400000	2110000	1050000	1120000	0.901427	0.342674	-1.54509
pma0253	O-methylChrysoeriol 5-O-hexoside	Flavone	88900	60800	63700	38000	29300	21800	0.81042	0.417526	-1.26006
pma0760	Selgin O-malonylhexoside	Flavone	38100	35900	30000	119000	129000	125000	1.01929	3.58654	1.84259
pma0779	Tricin O-rhamnosyl-O-malonylhexoside	Flavone	1790	9890	3630	4080	7910	5130	0.26973	1.11822	0.161208
pma0787	Quercetin-3-(6''-malonyl)-Glucoside	Flavonol	4340	11300	9060	6960	6680	10700	0.0413105	0.985425	-0.0211819
pma1108	Apigenin C-glucoside	Flavone	13100	26400	8850	2720	3380	4290	1.0333	0.214891	-2.21832
pma1116	Kaempferide	Flavonol	403000	642000	229000	2370000	2880000	2170000	1.19332	5.82418	2.54205
pma6218	O-methylnaringenin C-pentoside	Flavone	59900	55000	38700	28000	39500	18300	0.617777	0.558594	-0.840129
pma6389	Ayanin	Flavonol	15600	23100	16100	6440	9110	7650	0.807007	0.423358	-1.24005
pma6496	Luteolin 6-C-glucoside	Flavone	9780	9520	6440	6090	3480	3010	0.709802	0.488733	-1.03288
pma6515	C-hexosyl-chrysin O-feruloylhexoside	Flavone	6480	9000	5660	8500	11100	7650	0.355542	1.28903	0.366281
pma6558	Velutin	Flavone	43800	30500	50200	63000	46800	29100	0.100063	1.11566	0.157901
pma6576	Spinacetin	Flavone	33900	14800	21000	315000	174000	163000	1.32843	9.35438	3.22564
pma6638	O-methylChrysoeriol 7-O-hexoside	Flavone	84900	56300	64000	40400	32700	26600	0.728996	0.485867	-1.04137
pma6639	Isorhamnetin O-hexoside	Flavonol	23600000	22100000	24800000	46000000	47000000	44200000	0.735071	1.9461	0.960585
pmb0550	Cyanidin 3-O-glucoside (Kuromanin)	Anthocyanins	112000000	124000000	126000000	196000000	199000000	211000000	0.644298	1.67403	0.743328
pmb0563	Peonidin	Anthocyanins	407000	866000	272000	2310000	3620000	3100000	1.19142	5.84466	2.54712
pmb0565	Syringetin 3-O-hexoside	Flavonol	60700	88800	93600	800000	779000	736000	1.35586	9.52283	3.25139
pmb0566	Luteolin O-hexosyl-O-pentoside	Flavone	78500	123000	78800	92800	86200	109000	0.071186	1.02747	0.0390971
pmb0576	Apigenin O-malonylhexoside	Flavone	10500	15800	12900	11900	9130	31000	0.153235	1.3273	0.40849
pmb0579	Chrysoeriol O-sinapoylhexoside	Flavone	12200	20100	16200	50200	35900	53200	0.902693	2.87216	1.52214
pmb0580	Chrysin 5-O-glucoside (Toringin)	Flavone	223000	261000	268000	355000	312000	318000	0.443283	1.30984	0.389391
pmb0588	Luteolin 3',7-di-O-glucoside	Flavone	108000	114000	108000	290000	240000	271000	0.845612	2.42727	1.27934
pmb0592	Chrysoeriol O-hexosyl-O-rutinoside	Flavone	79900	96200	114000	32500	29700	22800	0.987363	0.293002	-1.77102
pmb0595	Isorhamnetin 5-O-hexoside	Flavonol	5110000	4270000	4340000	7590000	9440000	8280000	0.693516	1.84475	0.883427
pmb0600	Chrysoeriol 7-O-rutinoside	Flavone	9	9	9	4310000	5010000	4780000	3.27723	522222	18.9943
pmb0602	Syringetin 7-O-hexoside	Flavone	1870000	1670000	1710000	14800000	16300000	14200000	1.32512	8.62857	3.10912
pmb0604	Kaempferol 3-O-glucoside (Astragalin)	Flavonol	3800000	3130000	3660000	7800000	8290000	7450000	0.803066	2.22285	1.15241
pmb0618	8-C-hexosyl-hesperetin O-hexoside	Flavone	12900000	12500000	14600000	3940000	4110000	3430000	1.00622	0.287	-1.80088
pmb0624	6-C-hexosyl-luteolin O-hexoside	Flavone	15000	13400	14600	17100	15100	14800	0.210008	1.09302	0.128324
pmb0628	Eriodictiol C-hexosyl-O-hexoside	Flavone	138000	112000	148000	315000	295000	251000	0.779936	2.16332	1.11324
pmb0629	Chrysoeriol 6-C-hexoside	Flavone	20300	23900	22700	112000	99200	108000	1.12773	4.7713	2.25438
pmb0645	6-C-hexosyl-hesperetin O-hexoside	Flavone	4670000	4640000	4800000	8920000	8330000	6900000	0.645264	1.71155	0.775305
pmb0647	8-C-hexosyl-luteolin O-pentoside	Flavone	9	9	9	20200	18000	29400	2.52229	2503.7	11.2898
pmb0653	di-C,C-hexosyl-apigenin	Flavone	47900	36200	41700	505000	452000	494000	1.41233	11.5342	3.52784
pmb0660	C-hexosyl-luteolin O-p-coumaroylhexoside	Flavone	24500	31600	17900	16000	17300	13400	0.525766	0.631081	-0.664103
pmb0663	8-C-hexosyl-luteolin O-hexoside	Flavone	86100	98000	95800	139000	142000	119000	0.520065	1.42908	0.515089
pmb0665	Luteolin 8-C-hexosyl-O-hexoside	Flavone	154000	172000	155000	189000	220000	182000	0.371818	1.22869	0.297121
pmb0689	Chrysoeriol C-hexoside	Flavone	8490	15500	17700	8910	10300	15300	0.200688	0.827776	-0.272687
pmb0696	8-C-hexosyl chrysoeriol O-hexoside	Flavone	26400000	22500000	23500000	35800000	66200000	47500000	0.708711	2.06492	1.04608
pmb0711	Quercetin 7-O-rutinoside	Flavonol	4970000	5820000	4650000	5810000	6370000	5720000	0.296463	1.15933	0.213287
pmb0713	Tricin 7-O-hexosyl-O-hexoside	Flavone	980000	709000	1060000	1820000	1920000	1750000	0.736243	1.99709	0.997899
pmb0724	Tricin O-rhamnoside	Flavone	394000	425000	451000	187000	173000	184000	0.828973	0.428346	-1.22315
pmb0725	Tricin 7-O-feruloylhexoside	Flavone	2560	2400	2110	5900	5770	4030	0.77881	2.22065	1.15098
pmb0732	Tricin 5-O-feruloylhexoside	Flavone	28800	33900	29000	37900	36300	27200	0.167177	1.10578	0.145064
pmb0739	Tricin O-hexosyl-O-syringin alcohol	Flavone	8130	7500	7870	13600	8020	7980	0.280345	1.25957	0.332936
pmb0746	Tricin 4'-O-β-guaiacylglycerol	Flavone	4120	4670	5570	3200	2560	2090	0.669239	0.546657	-0.871291
pmb0835	Gallocatechin-gallocatechin	Polyphenol	59400000	77400000	75600000	15300000	14500000	16800000	1.10646	0.219397	-2.18838
pmb2831	Protocatechuic acid O-glucoside	Polyphenol	6460000	5440000	5940000	7920000	8000000	7370000	0.449707	1.30549	0.384595
pmb2850	Tricin	Flavone	661000	799000	431000	111000	159000	169000	1.06062	0.232152	-2.10686
pmb2947	Catechin-catechin-catechin	Polyphenol	597000	639000	640000	233000	211000	244000	0.903217	0.366738	-1.44718
pmb2957	Cyanidin O-syringic acid	Anthocyanins	11900000	23000000	24100000	9	9	9	3.44478	4.57627e-07	-21.0593
pmb2975	Hesperetin O-Glucuronic acid	Flavanone	6070	19500	14700	85900	56500	105000	1.19313	6.14353	2.61907
pmb2979	Hesperetin O-malonylhexoside	Flavanone	1230000	1570000	1320000	2010000	1570000	2060000	0.453908	1.36893	0.453051
pmb2983	Chrysoeriol C-pentosyl-O-rhamnosyl-rhamnoside	Flavone	2680	3810	3620	1040	2130	1270	0.782043	0.439169	-1.18715
pmb2987	Acacetin O-acetyl hexoside	Flavone	47300	68800	44800	15700	21000	23500	0.865166	0.374145	-1.41833
pmb2992	Acacetin O-glucuronic acid	Flavone	23400	40000	25200	27500	23300	32400	0.0618582	0.939052	-0.0907232
pmb2999	Chrysoeriol 5-O-hexoside	Flavone	104000	97500	134000	199000	191000	198000	0.663304	1.75261	0.809503
pmb3006	Apigenin 7-O-glucoside (Cosmosiin)	Flavone	17900	28500	26900	40500	31300	39100	0.524102	1.51296	0.597374
pmb3013	Isorhamnetin O-acetyl-hexoside	Flavonol	19000	23100	17700	152000	133000	150000	1.27131	7.27425	2.8628
pmb3014	Luteolin O-eudesmic acid-O-hexoside	Flavone	44600	61400	54200	21900	32900	20700	0.754805	0.471286	-1.08533
pmb3023	Eriodictyol C-hexoside	Flavone	2250000	2300000	2700000	6070000	4670000	5960000	0.811125	2.30345	1.2038
pmb3024	Luteolin C-hexoside	Flavone	9	1480	9	9	9	9	0.788056	0.018024	-5.79393
pmb3026	Quercetin O-acetylhexoside	Flavonol	90200	110000	123000	625000	451000	444000	1.11235	4.70297	2.23357
pmb3037	Tricin O-malonyl shikimic acid	Flavone	1480	3400	1600	1050	1830	1780	0.307526	0.719136	-0.475664
pmb3041	Tricin O-saccharic acid	Flavone	1440000	1520000	1400000	682000	582000	649000	0.817329	0.438761	-1.18849
pmb3046	Tricin 7-O-hexoside	Flavone	21500	24300	16100	73800	67100	71800	0.999365	3.43619	1.78081
pmb3047	Tricin 4'-O-(syringyl alcohol) ether 5-O-hexoside	Flavone	22600	27400	30900	27300	27100	34500	0.169704	1.09889	0.136044
pmb3114	Epicatechin-epiafzelechin	Polyphenol	26100	35800	28500	16600	15600	17000	0.682412	0.544248	-0.877664
pmb3894	Di-O-methylquercetin	Flavonol	826000	756000	644000	138000	151000	160000	1.13829	0.201707	-2.30967
pmc1990	4'-Hydroxy-5,7-dimethoxyflavanone	Flavanone	1590000	1640000	1730000	1930000	1690000	1880000	0.247104	1.10887	0.149091
pme0001	Hesperetin 7-O-neohesperidoside (Neohesperidin)	Flavanone	950000	1390000	1100000	278000	307000	816000	0.820074	0.407267	-1.29595
pme0088	Luteolin	Flavone	311000	289000	273000	140000	213000	169000	0.622501	0.597938	-0.741932
pme0197	Quercetin 3-O-rutinoside (Rutin)	Flavonol	1060000	1050000	929000	1630000	1460000	1690000	0.597353	1.57289	0.653414
pme0200	Kaempferol	Flavonol	23200000	29600000	25600000	7960000	22800000	24700000	0.44041	0.707398	-0.499406
pme0205	Catechin	Polyphenol	20900000	22100000	20100000	1620000	1560000	1770000	1.44077	0.0784469	-3.67214
pme0208	Amentoflavone	Flavone	69300	45700	54300	68800	105000	83800	0.515057	1.52156	0.605551
pme0324	Chrysin	Flavone	127000	131000	128000	2730	4310	1310	1.78062	0.0216321	-5.53068
pme0333	Apigenin 7-O-neohesperidoside (Rhoifolin)	Flavone	218000	177000	192000	85100	82100	66600	0.85808	0.398296	-1.32809
pme0355	Daidzein	Isoflavone	20800	38500	26700	16700	20100	19800	0.478201	0.65814	-0.603535
pme0361	Quercetin 3-alpha-L-arabinofuranoside (Avicularin)	Flavonol	13300000	13900000	14700000	9680000	12000000	11300000	0.413913	0.787112	-0.345359
pme0363	Chrysoeriol	Flavone	176000	183000	136000	34100	60400	59800	0.956543	0.311717	-1.68169
pme0367	Apigenin 7-rutinoside (Isorhoifolin)	Flavone	7110	11400	6100	52500	33700	50900	1.16869	5.57091	2.47791
pme0369	Kaempferol 3-O-rutinoside (Nicotiflorin)	Flavonol	249000	316000	289000	1690000	1490000	1830000	1.19858	5.86651	2.5525
pme0372	Naringenin 7-O-glucoside (Prunin)	Flavanone	239000	182000	3740000	9	9	9	2.97567	6.48882e-06	-17.2336
pme0376	Naringenin	Flavanone	1140000	1210000	1370000	1820000	2220000	1820000	0.587747	1.57527	0.655598
pme0379	Apigenin	Flavone	65100	79600	61700	30900	38200	29300	0.760851	0.476744	-1.06871
pme0431	Procyanidin A1	Proanthocyanidins	59600	93300	98200	29200	22300	23900	0.963166	0.300279	-1.73563
pme0434	Procyanidin B2	Proanthocyanidins	7270000	7180000	7280000	3660000	3220000	3840000	0.756582	0.493327	-1.01938
pme0436	Procyanidin B3	Proanthocyanidins	7510000	7600000	7350000	4000000	3590000	4010000	0.732523	0.516474	-0.953233
pme0442	Delphinidin	Anthocyanins	44000	27600	53200	9	9	9	2.61696	0.000216346	-12.1744
pme0450	L-Epicatechin	Polyphenol	26300000	26500000	25000000	9250000	8500000	9630000	0.922059	0.351928	-1.50665
pme1201	Phloretin	Flavanone	1330000	1500000	996000	283000	334000	296000	1.06754	0.23863	-2.06715
pme1398	Delphinidin 3-O-glucoside (Mirtillin)	Anthocyanins	10700000	12400000	10700000	37400000	37100000	42800000	1.00475	3.47041	1.79511
pme1478	Myricetin	Flavonol	16700000	22600000	15000000	8680000	15300000	11400000	0.512209	0.651565	-0.618018
pme1486	Epigallate catechin gallate (EGCG)	Polyphenol	47500000	50800000	49100000	19100000	19400000	21800000	0.852395	0.409091	-1.28951
pme1500	Kumatakenin	Flavonol	56400	44700	55100	73100	83800	47500	0.332981	1.30858	0.388001
pme1506	Kaempferol 7-O-rhamnoside	Flavonol	1510000	1690000	1720000	3440000	4050000	3660000	0.811866	2.26626	1.18031
pme1510	Baicalein (5,6,7-Trihydroxyflavone)	Flavone	19700	21900	17000	12500	12000	12600	0.591464	0.633106	-0.659481
pme1514	Epigallocatechin (EGC)	Polyphenol	11300000	10100000	9590000	2880000	2470000	2730000	1.04451	0.260729	-1.93938
pme1518	Nobiletin	Flavone	44300	19000	19600	73500	43300	54300	0.705416	2.06393	1.0454
pme1521	Dihydroquercetin (Taxifolin)	Flavonol	1820000	1830000	2000000	829000	787000	821000	0.826667	0.431327	-1.21314
pme1535	(+)-Gallocatechin (GC)	Polyphenol	16000000	16800000	15700000	2530000	2290000	2340000	1.24907	0.147629	-2.75995
pme1539	Isorhamnetin 3-O-neohesperidoside	Flavonol	1080000	1170000	1030000	1110000	1140000	1290000	0.181977	1.07927	0.110054
pme1541	Acacetin	Flavone	92400	117000	75600	44300	47200	71800	0.614386	0.572982	-0.803437
pme1550	Tangeretin	Flavone	30100	12900	13100	44400	24500	30100	0.589818	1.76471	0.819428
pme1552	Myricetin 3-O-rhamnoside (Myricitrin)	Flavonol	824000	890000	711000	1470000	1760000	2230000	0.786601	2.25155	1.17092
pme1562	Epicatechin gallate (ECG)	Polyphenol	53800000	55100000	51600000	13200000	12700000	13200000	1.07301	0.243614	-2.03733
pme1568	Orobol (5,7,3',4'-tetrahydroxyisoflavone)	Isoflavone	117000	111000	109000	35000	38500	30700	0.976828	0.309199	-1.69339
pme1580	Eriodictyol	Flavanone	39700000	34700000	39600000	6260000	7130000	7410000	1.17646	0.182456	-2.45438
pme1588	Isorhamnetin	Flavonol	53000000	58500000	53500000	24100000	47900000	50900000	0.404961	0.744848	-0.424981
pme1598	Hesperetin 5-O-glucoside	Flavanone	1160000	1240000	1330000	2100000	2030000	1980000	0.630463	1.63807	0.711997
pme1599	7-O-Methyleriodictyol	Flavanone	12100000	9110000	9030000	1530000	1440000	1780000	1.22216	0.157077	-2.67046
pme1605	Kaempferol 3-O-robinobioside (Biorobin)	Flavonol	264000	299000	298000	1570000	1300000	1760000	1.16545	5.37747	2.42693
pme1611	Isohemiphloin	Flavone	192000	261000	279000	141000	88000	117000	0.746535	0.472678	-1.08107
pme1624	Isovitexin	Flavone	15800	19400	9220	3520	4000	4480	0.984869	0.270149	-1.88817
pme1662	sakuranetin	Flavone	34100	15600	18000	13700	6020	12400	0.663906	0.474446	-1.07568
pme1773	Cyanidin 3-O-rutinoside (Keracyanin)	Anthocyanins	191000	149000	153000	146000	144000	169000	0.136452	0.931034	-0.103093
pme1777	Cyanidin 3,5-O-diglucoside (Cyanin)	Anthocyanins	59500000	92400000	71300000	17900000	16400000	19300000	1.06385	0.240143	-2.05803
pme1793	Pelargonin	Anthocyanins	5940000	5400000	5130000	17700000	17800000	18700000	0.985116	3.29083	1.71845
pme1824	Protocatechuic acid	Polyphenol	828000	969000	801000	520000	656000	618000	0.521594	0.690531	-0.534222
pme2247	Ellagic acid	Polyphenol	189000	222000	195000	284000	165000	233000	0.147475	1.12541	0.170454
pme2319	Hesperetin	Flavanone	2290000	1770000	2050000	211000	143000	166000	1.41572	0.0851064	-3.55459
pme2457	Luteolin 7-O-glucoside (Cynaroside)	Flavone	75200	92900	81800	124000	113000	78200	0.319276	1.2613	0.334917
pme2478	Protocatechuic aldehyde	Polyphenol	42200	42200	39800	54500	69200	61100	0.549006	1.48792	0.5733
pme2493	Kaempferol 3,7-dirhamnoside (Kaempferitrin)	Flavonol	419000	401000	429000	166000	128000	162000	0.903255	0.365092	-1.45367
pme2898	Dihydromyricetin	Flavonol	501000	462000	527000	1510000	1260000	1510000	0.92266	2.87248	1.5223
pme2949	Hesperetin 7-rutinoside (Hesperidin)	Flavanone	685000	1260000	1150000	269000	339000	763000	0.745604	0.442973	-1.17471
pme2954	Quercetin	Flavonol	44700000	54900000	51500000	7120000	17200000	22100000	0.958001	0.307214	-1.70269
pme2957	Naringenin chalcone	Flavanone	1940000	2090000	2330000	2960000	3790000	3140000	0.574535	1.55503	0.636944
pme2963	Aromadedrin (Dihydrokaempferol)	Flavonol	728000	813000	723000	674000	736000	683000	0.20141	0.92447	-0.113302
pme2982	Pinocembrin (Dihydrochrysin)	Flavanone	259000	254000	264000	40000	52600	36000	1.21107	0.165508	-2.59502
pme2984	Isosakuranetin-7-neohesperidoside (Poncirin)	Flavanone	5460000	5120000	5730000	6140000	6660000	5580000	0.258888	1.12692	0.17238
pme3130	Quercetin 4'-O-glucoside (Spiraeoside)	Flavonol	3610000	3340000	3290000	4260000	4030000	3940000	0.366246	1.19434	0.256209
pme3211	Quercetin 3-O-glucoside (Isotrifoliin)	Flavonol	1390000	1280000	1260000	2090000	1830000	1990000	0.56853	1.50382	0.588629
pme3215	Isoliquiritigenin	Flavanone	7830	8170	6900	4380	5490	4600	0.593947	0.631878	-0.662283
pme3268	Kaempferol 3-O-galactoside (Trifolin)	Flavonol	2590000	2250000	2520000	5210000	6250000	5090000	0.804549	2.24864	1.16905
pme3276	2'-Hydroxygenistein	Isoflavone	6260	2200	5060	13800	30100	18300	1.06836	4.60059	2.20182
pme3285	Afzelechin (3,5,7,4'-Tetrahydroxyflavan)	Flavanone	230000	170000	137000	8290	7120	6820	1.60266	0.0413966	-4.59434
pme3288	3,7-Di-O-methylquercetin	Flavonol	34000	33600	42100	23100	42100	26500	0.282254	0.835916	-0.25857
pme3292	Prunetin	Isoflavone	99400	108000	73000	44500	38400	69100	0.652781	0.542083	-0.883415
pme3296	Kaempferol 3-O-rhamnoside (Kaempferin)	Flavonol	3740000	3990000	4350000	16800000	14500000	15100000	1.04548	3.84106	1.9415
pme3303	Tricetin	Flavone	1820000	2200000	2310000	306000	330000	349000	1.22854	0.155608	-2.68401
pme3369	Rhamnetin (7-O-methxyl quercetin)	Flavonol	19400	12800	25300	83400	175000	116000	1.20519	6.5113	2.70295
pme3391	Petunidin 3-O-glucoside	Anthocyanins	1590000	1990000	1450000	5470000	5140000	4850000	0.953077	3.07356	1.61991
pme3392	Pelargonidin 3-O-beta-D-glucoside（Callistephin chloride)	Anthocyanins	3490000	3230000	3210000	81700000	79400000	82200000	1.61557	24.5015	4.6148
pme3399	Sissotrin	Isoflavone	290000	353000	327000	96600	117000	131000	0.911665	0.355258	-1.49306
pme3401	Syringetin	Flavonol	1760000	2120000	1360000	2010000	3950000	4040000	0.617854	1.9084	0.932361
pme3407	Laricitrin	Flavonol	438000	412000	317000	359000	476000	446000	0.164368	1.09769	0.134466
pme3442	Quercetin 7-O-β-D-Glucuronide	Flavonol	88400	107000	94800	243000	181000	213000	0.78569	2.19504	1.13425
pme3461	Homoeriodictyol	Flavanone	8920000	7320000	8710000	919000	1440000	1310000	1.24761	0.147054	-2.76558
pme3464	Isosakuranetin (4'-Methylnaringenin)	Flavanone	481000	603000	432000	67100	224000	252000	0.873293	0.358245	-1.48098
pme3473	Butin	Flavone	2040000	2210000	2260000	3210000	3710000	3070000	0.576334	1.53456	0.617827
pme3484	Myricetin 3-O-galactoside	Flavonol	772000	716000	1030000	5550000	4620000	4420000	1.19313	5.79428	2.53463
pme3502	Formononetin 7-O-glucoside (Ononin)	Isoflavone	29300	23400	23700	52200	35300	49800	0.649584	1.79712	0.845687
pme3509	7,4'-Dihydroxyflavone	Flavone	19300	24500	21900	16100	6040	14100	0.63419	0.551598	-0.85831
pme3514	Morin	Flavonol	2570000	3120000	2860000	556000	1320000	1360000	0.860123	0.37848	-1.40171
pmf0011	Apigenin 6,8-C-diglucoside	Flavone	2430	4040	3400	3320	2670	3520	0.0352228	0.963526	-0.0536047
pmf0012	6,8-di-C-glucoside Apigenine	Flavone	26300	35400	37700	7870	7360	7520	1.08647	0.228873	-2.12738
pmf0027	Cyanidin 3-O-galactoside	Anthocyanins	4460000	5690000	5670000	22300000	22500000	24200000	1.09457	4.36157	2.12485
pmf0057	4,2',4',6'-Tetrahydroxychalcone	Flavone	3810000	4040000	3630000	1380000	1570000	1410000	0.886612	0.379791	-1.39672
pmf0058	4',5,7-Trihydroxyflavanone	Flavanone	4330000	4320000	4070000	1530000	1790000	1550000	0.883193	0.382862	-1.3851
pmf0109	3-O-Acetylpinobanksin	Flavonoid	1630000	1930000	1760000	26700	74400	24800	1.76361	0.0236654	-5.40108
pmf0115	Galangin	Flavonoid	53500	52300	44000	2120	6890	6840	1.35451	0.105808	-3.24048
pmf0179	Narcissoside	Flavonoid	2350000	2850000	2330000	9090000	7040000	8990000	0.98287	3.33599	1.73811
pmf0204	Hyperoside	Flavonoid	3880000	3740000	3740000	4790000	4680000	4210000	0.370389	1.20423	0.268105
pmf0208	Isoquercitroside	Flavonoid	4290000	4020000	4280000	4920000	5030000	4690000	0.338474	1.16283	0.217637
pmf0216	Catechin gallate，CG	Polyphenol	3110000	3420000	2710000	424000	440000	432000	1.26291	0.14026	-2.83383
pmf0233	Tiliroside	Flavonoid	32500000	33400000	31300000	35300000	36400000	33400000	0.222397	1.08128	0.112734
pmf0238	Theaflavin-3-gallate	Polyphenol	760000	754000	740000	153000	183000	184000	1.09327	0.230701	-2.1159
pmf0240	Theaflavin	Polyphenol	782000	723000	753000	147000	181000	177000	1.10434	0.223649	-2.16069
pmf0246	Orientin	Flavonoid	26200	29600	29700	17700	18500	21500	0.550503	0.674854	-0.567353
pmf0260	Sinensetin	Flavonoid	9	9	9	1540	1710	1460	2.05156	174.444	7.44662
pmf0265	5,7-Dihydroxychromone	Flavonoid	130000	169000	135000	53300	45700	58900	0.897143	0.363825	-1.45868
pmf0274	Herbacetin	Flavonoid	2500000	2970000	2640000	535000	1290000	1430000	0.828237	0.401356	-1.31704
pmf0279	Gossypitrin	Flavonoid	27600000	25100000	29600000	35000000	35100000	32700000	0.406415	1.24909	0.320876
pmf0302	Engeletin	Flavonoid	314000	348000	314000	825000	787000	845000	0.866623	2.51742	1.33194
pmf0330	Spinosin	Flavonoid	9	9	9	4400	5850	6150	2.28432	607.407	9.24652
pmf0344	(-)-Epiafzelechin	Polyphenol	5490	9400	7400	8000	5390	5840	0.194722	0.862719	-0.213038
pmf0361	Astilbin	Flavonoid	814000	946000	784000	186000	260000	268000	1.01166	0.28066	-1.8331
pmf0362	Hydroxygenkwanin	Flavonoid	37600	27700	32000	9090	17400	11700	0.849156	0.392497	-1.34924
pmf0369	Persicoside	Flavonoid	81300	72200	87500	393000	303000	289000	1.06267	4.08714	2.03109
pmf0371	Pedalitin	Flavonoid	4650000	5700000	4280000	2100000	2750000	2730000	0.708885	0.518113	-0.94866
pmf0374	Isorhamnetin 3-O-glucoside	Flavonoid	24600000	20200000	26200000	90500000	82500000	93600000	1.03634	3.75493	1.90879
pmf0379	Gallocatechin gallate	Polyphenol	2940000	2270000	2600000	972000	764000	716000	0.963568	0.313956	-1.67136
pmf0382	5,7-Dihydroxy-3',4',5'-trimethoxyflavone	Flavonoid	57900	63900	76200	9140	4850	6200	1.36321	0.10197	-3.29379
pmf0392	Persicogenin	Flavonoid	14300	13400	10600	1880	5720	6010	0.880233	0.355352	-1.49268
pmf0458	6-Gingerol	Polyphenol	974000	829000	697000	2320000	1700000	1380000	0.746951	2.16	1.11103
pmf0472	Apiin	Flavonoid	7840	9020	6140	5160	4290	7270	0.419978	0.726957	-0.460059
pmf0550	Diosmin	Flavonoid	69800	43400	22900	5220000	6220000	5530000	1.99571	124.688	6.96218
pmf0567	Tectorigenin	Flavonoid	5040	3810	5400	2640	3650	1650	0.629232	0.557193	-0.843751
pmf0583	Phloridzin	Flavonoid	3450000	4400000	4000000	1580000	1630000	1630000	0.847152	0.408439	-1.29181
pmf0615	Petunidin 3, 5-diglucoside	Anthocyanins	25400000	33400000	27100000	7380000	6460000	6300000	1.08153	0.234459	-2.09259
pmf0616	Malvidin 3-acetyl-5-diglucoside	Anthocyanins	28900	45400	45000	10800	15100	14500	0.91043	0.338642	-1.56217
pmf0617	Peonidin 3-sophoroside-5-glucoside.	Anthocyanins	78800	105000	67900	79800	63300	59100	0.30962	0.803337	-0.315922
