# Supplementary material for: <span aria-describedby="tippy-17">Transcriptomic and Metabolomic Profiling Provides Insights into Flavonoids Biosynthesis and Flower Coloring in <em>Loropetalum chinense</em> and <em>Loropetalum chinense</em> var. <em>rubrum</em>
Source: Preprints.org preprint supplement (doi:10.20944/preprints202304.0456.v1), 2023-04-18
Supplement: Supplementary file 32 [file supplementary table S6.xlsx]

## Sheet: Table S6 
Supplementary table S6 The differential accumulated metabolites in group of XNNC VS XNXY
Index	Compounds	Class	XNNC1	XNNC2	XNNC3	XNXY1	XNXY2	XNXY3	VIP	Fold_Change	LogFC
pma0249	Selgin 5-O-hexoside	Flavone	3450000	3640000	5400000	1250000	970000	1510000	0.762181	0.298639	-1.74353
pma0253	O-methylChrysoeriol 5-O-hexoside	Flavone	88900	60800	63700	396000	226000	248000	0.820193	4.07685	2.02746
pma0760	Selgin O-malonylhexoside	Flavone	38100	35900	30000	5640	4530	5340	0.979305	0.149135	-2.74531
pma0779	Tricin O-rhamnosyl-O-malonylhexoside	Flavone	1790	9890	3630	9	9	9	1.74607	0.00176355	-9.1473
pma0787	Quercetin-3-(6''-malonyl)-Glucoside	Flavonol	4340	11300	9060	46900	46400	46400	0.934791	5.65587	2.49975
pma1108	Apigenin C-glucoside	Flavone	13100	26400	8850	5660	6800	2040	0.694497	0.299897	-1.73746
pma1116	Kaempferide	Flavonol	403000	642000	229000	9	9	9	2.32417	2.11931e-05	-15.526
pma6218	O-methylnaringenin C-pentoside	Flavone	59900	55000	38700	11100	13400	21600	0.761199	0.30013	-1.73634
pma6389	Ayanin	Flavonol	15600	23100	16100	9020	9050	9850	0.557305	0.509489	-0.972877
pma6496	Luteolin 6-C-glucoside	Flavone	9780	9520	6440	7170	9	4550	0.807755	0.455672	-1.13393
pma6515	C-hexosyl-chrysin O-feruloylhexoside	Flavone	6480	9000	5660	9	9	9	1.83399	0.0012772	-9.6128
pma6558	Velutin	Flavone	43800	30500	50200	100000	50200	45500	0.345452	1.57189	0.652498
pma6576	Spinacetin	Flavone	33900	14800	21000	11700	12700	10100	0.511577	0.494978	-1.01456
pma6638	O-methylChrysoeriol 7-O-hexoside	Flavone	84900	56300	64000	412000	233000	255000	0.84239	4.38596	2.13289
pma6639	Isorhamnetin O-hexoside	Flavonol	23600000	22100000	24800000	2450000	2110000	2330000	1.08508	0.0977305	-3.35505
pma6647	C-hexosyl-chrysoeriol O-hexoside	Flavone	9	9	9	35200	46000	39100	2.06238	4455.56	12.1214
pmb0550	Cyanidin 3-O-glucoside (Kuromanin)	Anthocyanins	112000000	124000000	126000000	5330000	4190000	9470000	1.22609	0.0524586	-4.25268
pmb0563	Peonidin	Anthocyanins	407000	866000	272000	9	9	9	2.34105	1.74757e-05	-15.8043
pmb0565	Syringetin 3-O-hexoside	Flavonol	60700	88800	93600	12300	12500	9540	0.986243	0.141259	-2.82359
pmb0566	Luteolin O-hexosyl-O-pentoside	Flavone	78500	123000	78800	80700	77600	64900	0.238886	0.79629	-0.328635
pmb0576	Apigenin O-malonylhexoside	Flavone	10500	15800	12900	17200	15900	3910	0.163604	0.944133	-0.0829385
pmb0579	Chrysoeriol O-sinapoylhexoside	Flavone	12200	20100	16200	9	9	9	1.94506	0.000556701	-10.8108
pmb0580	Chrysin 5-O-glucoside (Toringin)	Flavone	223000	261000	268000	144000	139000	81300	0.582767	0.484441	-1.04561
pmb0588	Luteolin 3',7-di-O-glucoside	Flavone	108000	114000	108000	1660000	1660000	1660000	1.17272	15.0909	3.91561
pmb0592	Chrysoeriol O-hexosyl-O-rutinoside	Flavone	79900	96200	114000	33400	32600	31700	0.732134	0.33678	-1.57012
pmb0595	Isorhamnetin 5-O-hexoside	Flavonol	5110000	4270000	4340000	527000	412000	479000	1.07115	0.103353	-3.27435
pmb0602	Syringetin 7-O-hexoside	Flavone	1870000	1670000	1710000	687000	600000	757000	0.68824	0.389333	-1.36092
pmb0604	Kaempferol 3-O-glucoside (Astragalin)	Flavonol	3800000	3130000	3660000	10400000	10700000	10600000	0.744251	2.99339	1.58178
pmb0618	8-C-hexosyl-hesperetin O-hexoside	Flavone	12900000	12500000	14600000	25900000	29000000	32000000	0.620514	2.1725	1.11936
pmb0622	C-hexosyl-luteolin O-hexoside	Flavone	9	9	9	1760	1290	2970	1.64268	222.963	7.80066
pmb0624	6-C-hexosyl-luteolin O-hexoside	Flavone	15000	13400	14600	106000	93600	97800	0.989152	6.91628	2.79
pmb0628	Eriodictiol C-hexosyl-O-hexoside	Flavone	138000	112000	148000	2480000	2620000	2240000	1.21494	18.4422	4.20494
pmb0629	Chrysoeriol 6-C-hexoside	Flavone	20300	23900	22700	9	9	9	1.98954	0.000403587	-11.2748
pmb0645	6-C-hexosyl-hesperetin O-hexoside	Flavone	4670000	4640000	4800000	8360000	7430000	7400000	0.497529	1.64352	0.716785
pmb0647	8-C-hexosyl-luteolin O-pentoside	Flavone	9	9	9	20200	18000	14000	1.95618	1933.33	10.9169
pmb0653	di-C,C-hexosyl-apigenin	Flavone	47900	36200	41700	9	9	9	2.06785	0.000214626	-12.1859
pmb0660	C-hexosyl-luteolin O-p-coumaroylhexoside	Flavone	24500	31600	17900	10100	11900	8920	0.630203	0.417838	-1.25898
pmb0663	8-C-hexosyl-luteolin O-hexoside	Flavone	86100	98000	95800	45600	52300	34600	0.604463	0.473383	-1.07892
pmb0665	Luteolin 8-C-hexosyl-O-hexoside	Flavone	154000	172000	155000	2180000	1930000	2090000	1.1377	12.8898	3.68816
pmb0689	Chrysoeriol C-hexoside	Flavone	8490	15500	17700	8090	7700	16200	0.233408	0.76733	-0.38208
pmb0696	8-C-hexosyl chrysoeriol O-hexoside	Flavone	26400000	22500000	23500000	9	9	9	2.73842	3.72928e-07	-21.3546
pmb0711	Quercetin 7-O-rutinoside	Flavonol	4970000	5820000	4650000	42500000	41100000	43500000	1.03344	8.23187	3.04122
pmb0713	Tricin 7-O-hexosyl-O-hexoside	Flavone	980000	709000	1060000	9	9	9	2.41536	9.82175e-06	-16.6356
pmb0724	Tricin O-rhamnoside	Flavone	394000	425000	451000	297000	242000	272000	0.466414	0.638583	-0.647055
pmb0725	Tricin 7-O-feruloylhexoside	Flavone	2560	2400	2110	16400	12700	16400	0.967264	6.43564	2.68608
pmb0732	Tricin 5-O-feruloylhexoside	Flavone	28800	33900	29000	26200	31700	35500	0.0214094	1.01854	0.0265008
pmb0739	Tricin O-hexosyl-O-syringin alcohol	Flavone	8130	7500	7870	221000	232000	222000	1.3043	28.7234	4.84415
pmb0746	Tricin 4'-O-β-guaiacylglycerol	Flavone	4120	4670	5570	4430	4060	5450	0.0417197	0.970752	-0.0428252
pmb0835	Gallocatechin-gallocatechin	Polyphenol	59400000	77400000	75600000	597000	489000	445000	1.58002	0.0072081	-7.11617
pmb2831	Protocatechuic acid O-glucoside	Polyphenol	6460000	5440000	5940000	3750000	4300000	5020000	0.368795	0.732623	-0.448856
pmb2850	Tricin	Flavone	661000	799000	431000	805000	916000	734000	0.295233	1.29825	0.376574
pmb2947	Catechin-catechin-catechin	Polyphenol	597000	639000	640000	721000	702000	640000	0.188098	1.09968	0.137084
pmb2957	Cyanidin O-syringic acid	Anthocyanins	11900000	23000000	24100000	149000	122000	307000	1.52723	0.00979661	-6.6735
pmb2975	Hesperetin O-Glucuronic acid	Flavanone	6070	19500	14700	9	9	9	1.90489	0.000670474	-10.5425
pmb2979	Hesperetin O-malonylhexoside	Flavanone	1230000	1570000	1320000	470000	473000	415000	0.744407	0.329612	-1.60116
pmb2983	Chrysoeriol C-pentosyl-O-rhamnosyl-rhamnoside	Flavone	2680	3810	3620	4970	5000	4760	0.413378	1.45697	0.542974
pmb2987	Acacetin O-acetyl hexoside	Flavone	47300	68800	44800	48100	40100	44900	0.212603	0.827222	-0.273654
pmb2992	Acacetin O-glucuronic acid	Flavone	23400	40000	25200	9	9	9	2.02081	0.00030474	-11.6801
pmb2999	Chrysoeriol 5-O-hexoside	Flavone	104000	97500	134000	130000	149000	114000	0.211894	1.17139	0.228217
pmb3006	Apigenin 7-O-glucoside (Cosmosiin)	Flavone	17900	28500	26900	52600	38700	49000	0.545182	1.91405	0.93663
pmb3013	Isorhamnetin O-acetyl-hexoside	Flavonol	19000	23100	17700	5950	7850	9560	0.676334	0.390635	-1.35611
pmb3014	Luteolin O-eudesmic acid-O-hexoside	Flavone	44600	61400	54200	72500	65800	74200	0.347922	1.32647	0.407589
pmb3023	Eriodictyol C-hexoside	Flavone	2250000	2300000	2700000	5300000	5170000	4350000	0.593637	2.04414	1.03149
pmb3024	Luteolin C-hexoside	Flavone	9	1480	9	9	9	9	0.620461	0.018024	-5.79393
pmb3026	Quercetin O-acetylhexoside	Flavonol	90200	110000	123000	305000	292000	209000	0.661174	2.49381	1.31835
pmb3037	Tricin O-malonyl shikimic acid	Flavone	1480	3400	1600	908	1510	1310	0.400331	0.575309	-0.797592
pmb3041	Tricin O-saccharic acid	Flavone	1440000	1520000	1400000	2580000	3180000	2560000	0.562586	1.90826	0.932255
pmb3046	Tricin 7-O-hexoside	Flavone	21500	24300	16100	50800	56100	62800	0.706155	2.74152	1.45498
pmb3047	Tricin 4'-O-(syringyl alcohol) ether 5-O-hexoside	Flavone	22600	27400	30900	41400	41200	36900	0.424736	1.47713	0.562799
pmb3114	Epicatechin-epiafzelechin	Polyphenol	26100	35800	28500	94500	88600	76000	0.723877	2.86615	1.51911
pmb3894	Di-O-methylquercetin	Flavonol	826000	756000	644000	337000	298000	308000	0.65259	0.42363	-1.23912
pmc1990	4'-Hydroxy-5,7-dimethoxyflavanone	Flavanone	1590000	1640000	1730000	1590000	1320000	1660000	0.14749	0.921371	-0.118146
pme0001	Hesperetin 7-O-neohesperidoside (Neohesperidin)	Flavanone	950000	1390000	1100000	1040000	835000	711000	0.312004	0.751744	-0.411686
pme0088	Luteolin	Flavone	311000	289000	273000	213000	204000	224000	0.38685	0.73425	-0.445657
pme0197	Quercetin 3-O-rutinoside (Rutin)	Flavonol	1060000	1050000	929000	14100000	12900000	12600000	1.14008	13.0306	3.70383
pme0200	Kaempferol	Flavonol	23200000	29600000	25600000	60000000	63800000	57100000	0.647074	2.3074	1.20627
pme0205	Catechin	Polyphenol	20900000	22100000	20100000	5750000	4520000	5110000	0.844648	0.24374	-2.03658
pme0208	Amentoflavone	Flavone	69300	45700	54300	164000	150000	147000	0.706436	2.72298	1.44518
pme0324	Chrysin	Flavone	127000	131000	128000	6660	6500	4140	1.25591	0.0448187	-4.47976
pme0333	Apigenin 7-O-neohesperidoside (Rhoifolin)	Flavone	218000	177000	192000	272000	277000	253000	0.383138	1.36627	0.450242
pme0355	Daidzein	Isoflavone	20800	38500	26700	28800	16700	20000	0.255496	0.761628	-0.392842
pme0361	Quercetin 3-alpha-L-arabinofuranoside (Avicularin)	Flavonol	13300000	13900000	14700000	23300000	21700000	20900000	0.474754	1.57279	0.653328
pme0363	Chrysoeriol	Flavone	176000	183000	136000	88100	73100	109000	0.527491	0.545859	-0.873401
pme0367	Apigenin 7-rutinoside (Isorhoifolin)	Flavone	7110	11400	6100	9	9	9	1.85185	0.00109711	-9.83207
pme0369	Kaempferol 3-O-rutinoside (Nicotiflorin)	Flavonol	249000	316000	289000	5790000	5750000	5170000	1.22745	19.5667	4.29033
pme0372	Naringenin 7-O-glucoside (Prunin)	Flavanone	239000	182000	3740000	14100000	8520000	15800000	1.15787	9.23336	3.20686
pme0376	Naringenin	Flavanone	1140000	1210000	1370000	665000	610000	663000	0.568692	0.520968	-0.940734
pme0379	Apigenin	Flavone	65100	79600	61700	150000	180000	144000	0.639842	2.29651	1.19944
pme0431	Procyanidin A1	Proanthocyanidins	59600	93300	98200	65000	86600	75600	0.0968204	0.904819	-0.144299
pme0434	Procyanidin B2	Proanthocyanidins	7270000	7180000	7280000	10100000	8490000	8180000	0.29532	1.23194	0.300929
pme0436	Procyanidin B3	Proanthocyanidins	7510000	7600000	7350000	10200000	9220000	8920000	0.331768	1.2618	0.335482
pme0442	Delphinidin	Anthocyanins	44000	27600	53200	201000	318000	191000	0.922069	5.6891	2.5082
pme0450	L-Epicatechin	Polyphenol	26300000	26500000	25000000	40800000	38300000	36000000	0.44014	1.47943	0.565046
pme1201	Phloretin	Flavanone	1330000	1500000	996000	445000	432000	401000	0.731456	0.33403	-1.58195
pme1398	Delphinidin 3-O-glucoside (Mirtillin)	Anthocyanins	10700000	12400000	10700000	231000	153000	301000	1.408	0.0202663	-5.62478
pme1478	Myricetin	Flavonol	16700000	22600000	15000000	15400000	17600000	11200000	0.228841	0.813996	-0.296906
pme1486	Epigallate catechin gallate (EGCG)	Polyphenol	47500000	50800000	49100000	40000000	38000000	47600000	0.250928	0.852103	-0.2309
pme1500	Kumatakenin	Flavonol	56400	44700	55100	75200	58100	39300	0.0779617	1.10499	0.144038
pme1506	Kaempferol 7-O-rhamnoside	Flavonol	1510000	1690000	1720000	7950000	8000000	8040000	0.895939	4.87602	2.2857
pme1510	Baicalein (5,6,7-Trihydroxyflavone)	Flavone	19700	21900	17000	15600	12700	14800	0.362311	0.735495	-0.443213
pme1514	Epigallocatechin (EGC)	Polyphenol	11300000	10100000	9590000	8240000	6710000	7620000	0.38123	0.728299	-0.457396
pme1518	Nobiletin	Flavone	44300	19000	19600	94200	106000	60200	0.729479	3.14113	1.65129
pme1521	Dihydroquercetin (Taxifolin)	Flavonol	1820000	1830000	2000000	2170000	1480000	1580000	0.12653	0.925664	-0.11144
pme1535	(+)-Gallocatechin (GC)	Polyphenol	16000000	16800000	15700000	4410000	4410000	4630000	0.805769	0.27732	-1.85038
pme1539	Isorhamnetin 3-O-neohesperidoside	Flavonol	1080000	1170000	1030000	363000	336000	447000	0.726407	0.34939	-1.51709
pme1541	Acacetin	Flavone	92400	117000	75600	165000	132000	140000	0.43151	1.53333	0.616671
pme1550	Tangeretin	Flavone	30100	12900	13100	72700	73300	42500	0.752413	3.36007	1.74849
pme1552	Myricetin 3-O-rhamnoside (Myricitrin)	Flavonol	824000	890000	711000	1720000	1680000	1710000	0.611457	2.10722	1.07534
pme1562	Epicatechin gallate (ECG)	Polyphenol	53800000	55100000	51600000	46200000	47000000	47100000	0.255253	0.874143	-0.194058
pme1568	Orobol (5,7,3',4'-tetrahydroxyisoflavone)	Isoflavone	117000	111000	109000	56700	47100	59900	0.600435	0.485757	-1.04169
pme1580	Eriodictyol	Flavanone	39700000	34700000	39600000	14700000	9800000	11400000	0.760511	0.314912	-1.66698
pme1588	Isorhamnetin	Flavonol	53000000	58500000	53500000	11000000	12700000	9970000	0.896459	0.204061	-2.29293
pme1598	Hesperetin 5-O-glucoside	Flavanone	1160000	1240000	1330000	2280000	2070000	2690000	0.55556	1.8874	0.9164
pme1599	7-O-Methyleriodictyol	Flavanone	12100000	9110000	9030000	645000	602000	638000	1.18256	0.0623347	-4.00382
pme1605	Kaempferol 3-O-robinobioside (Biorobin)	Flavonol	264000	299000	298000	6060000	5830000	5380000	1.23237	20.0581	4.32611
pme1611	Isohemiphloin	Flavone	192000	261000	279000	276000	321000	252000	0.199364	1.15984	0.213921
pme1624	Isovitexin	Flavone	15800	19400	9220	4110	3520	6250	0.722902	0.312472	-1.6782
pme1662	sakuranetin	Flavone	34100	15600	18000	6560	6200	7750	0.727115	0.302954	-1.72283
pme1773	Cyanidin 3-O-rutinoside (Keracyanin)	Anthocyanins	191000	149000	153000	313000	260000	259000	0.498441	1.68763	0.754996
pme1777	Cyanidin 3,5-O-diglucoside (Cyanin)	Anthocyanins	59500000	92400000	71300000	444000	381000	345000	1.62812	0.00524194	-7.57568
pme1793	Pelargonin	Anthocyanins	5940000	5400000	5130000	93500	122000	97100	1.41752	0.01898	-5.71938
pme1824	Protocatechuic acid	Polyphenol	828000	969000	801000	1490000	1340000	1800000	0.522813	1.78214	0.833611
pme2247	Ellagic acid	Polyphenol	189000	222000	195000	193000	137000	162000	0.276263	0.811881	-0.300659
pme2319	Hesperetin	Flavanone	2290000	1770000	2050000	77000	72600	67900	1.2985	0.0355974	-4.81209
pme2457	Luteolin 7-O-glucoside (Cynaroside)	Flavone	75200	92900	81800	47500	59000	39400	0.500212	0.583834	-0.776371
pme2478	Protocatechuic aldehyde	Polyphenol	42200	42200	39800	48000	57500	54000	0.337967	1.28422	0.360891
pme2493	Kaempferol 3,7-dirhamnoside (Kaempferitrin)	Flavonol	419000	401000	429000	589000	531000	550000	0.377503	1.33707	0.419075
pme2898	Dihydromyricetin	Flavonol	501000	462000	527000	1010000	969000	895000	0.573428	1.92886	0.947748
pme2949	Hesperetin 7-rutinoside (Hesperidin)	Flavanone	685000	1260000	1150000	1230000	948000	649000	0.0873615	0.913409	-0.130668
pme2954	Quercetin	Flavonol	44700000	54900000	51500000	47200000	51600000	41400000	0.122216	0.927862	-0.108017
pme2957	Naringenin chalcone	Flavanone	1940000	2090000	2330000	1130000	952000	1140000	0.579322	0.506604	-0.98107
pme2963	Aromadedrin (Dihydrokaempferol)	Flavonol	728000	813000	723000	1590000	1570000	1440000	0.596676	2.0318	1.02276
pme2982	Pinocembrin (Dihydrochrysin)	Flavanone	259000	254000	264000	18500	17400	15300	1.17407	0.0658945	-3.9237
pme2984	Isosakuranetin-7-neohesperidoside (Poncirin)	Flavanone	5460000	5120000	5730000	4080000	3980000	3870000	0.392395	0.731453	-0.451163
pme3130	Quercetin 4'-O-glucoside (Spiraeoside)	Flavonol	3610000	3340000	3290000	4500000	4340000	4310000	0.350792	1.28418	0.360847
pme3208	Glycitin	Isoflavone	9	9	9	10200	8180	7900	1.86603	973.333	9.92679
pme3211	Quercetin 3-O-glucoside (Isotrifoliin)	Flavonol	1390000	1280000	1260000	2270000	2070000	2250000	0.50834	1.67684	0.745749
pme3215	Isoliquiritigenin	Flavanone	7830	8170	6900	4590	4230	3650	0.545954	0.544541	-0.876886
pme3268	Kaempferol 3-O-galactoside (Trifolin)	Flavonol	2590000	2250000	2520000	6600000	6610000	6400000	0.703799	2.6644	1.41381
pme3276	2'-Hydroxygenistein	Isoflavone	6260	2200	5060	10600	10100	18800	0.686695	2.9216	1.54676
pme3285	Afzelechin (3,5,7,4'-Tetrahydroxyflavan)	Flavanone	230000	170000	137000	9540	10600	6820	1.22487	0.0502048	-4.31603
pme3288	3,7-Di-O-methylquercetin	Flavonol	34000	33600	42100	3680	6230	7890	0.955625	0.162261	-2.62361
pme3292	Prunetin	Isoflavone	99400	108000	73000	156000	126000	133000	0.410399	1.48003	0.565625
pme3296	Kaempferol 3-O-rhamnoside (Kaempferin)	Flavonol	3740000	3990000	4350000	31900000	30000000	31100000	1.0169	7.69868	2.94461
pme3303	Tricetin	Flavone	1820000	2200000	2310000	5870000	5910000	4630000	0.685749	2.59242	1.3743
pme3369	Rhamnetin (7-O-methxyl quercetin)	Flavonol	19400	12800	25300	90300	92700	170000	0.934708	6.13913	2.61803
pme3391	Petunidin 3-O-glucoside	Anthocyanins	1590000	1990000	1450000	9	9	9	2.47863	5.36779e-06	-17.5072
pme3392	Pelargonidin 3-O-beta-D-glucoside（Callistephin chloride)	Anthocyanins	3490000	3230000	3210000	92300	82400	113000	1.34006	0.0289728	-5.10916
pme3399	Sissotrin	Isoflavone	290000	353000	327000	235000	196000	341000	0.274066	0.795876	-0.329384
pme3401	Syringetin	Flavonol	1760000	2120000	1360000	348000	431000	340000	0.873479	0.21355	-2.22736
pme3407	Laricitrin	Flavonol	438000	412000	317000	147000	135000	116000	0.727871	0.341045	-1.55196
pme3442	Quercetin 7-O-β-D-Glucuronide	Flavonol	88400	107000	94800	228000	263000	226000	0.67281	2.47071	1.30493
pme3461	Homoeriodictyol	Flavanone	8920000	7320000	8710000	4720000	4020000	2450000	0.615891	0.448497	-1.15683
pme3464	Isosakuranetin (4'-Methylnaringenin)	Flavanone	481000	603000	432000	81300	57900	104000	0.957074	0.160422	-2.64005
pme3473	Butin	Flavone	2040000	2210000	2260000	1100000	1110000	1100000	0.583665	0.508449	-0.975826
pme3484	Myricetin 3-O-galactoside	Flavonol	772000	716000	1030000	8230000	8430000	8520000	1.08074	10	3.32193
pme3502	Formononetin 7-O-glucoside (Ononin)	Isoflavone	29300	23400	23700	53400	78000	64200	0.674607	2.56021	1.35626
pme3509	7,4'-Dihydroxyflavone	Flavone	19300	24500	21900	10700	8360	12300	0.597212	0.477321	-1.06697
pme3514	Morin	Flavonol	2570000	3120000	2860000	3080000	3320000	2510000	0.0590782	1.04211	0.059501
pmf0011	Apigenin 6,8-C-diglucoside	Flavone	2430	4040	3400	9	9	9	1.72482	0.00273556	-8.51395
pmf0012	6,8-di-C-glucoside Apigenine	Flavone	26300	35400	37700	18900	17400	16100	0.54601	0.527163	-0.923679
pmf0027	Cyanidin 3-O-galactoside	Anthocyanins	4460000	5690000	5670000	146000	140000	283000	1.30059	0.0359671	-4.79718
pmf0057	4,2',4',6'-Tetrahydroxychalcone	Flavone	3810000	4040000	3630000	2040000	1900000	1740000	0.594061	0.494774	-1.01516
pmf0058	4',5,7-Trihydroxyflavanone	Flavanone	4330000	4320000	4070000	2360000	2100000	1990000	0.583982	0.507075	-0.979728
pmf0109	3-O-Acetylpinobanksin	Flavonoid	1630000	1930000	1760000	104000	113000	64200	1.22158	0.0528571	-4.24176
pmf0115	Galangin	Flavonoid	53500	52300	44000	33100	39100	27200	0.427768	0.663551	-0.59172
pmf0179	Narcissoside	Flavonoid	2350000	2850000	2330000	2140000	2680000	2720000	1.88386e-05	1.00133	0.00191466
pmf0204	Hyperoside	Flavonoid	3880000	3740000	3740000	5000000	4930000	5040000	0.373015	1.31778	0.398111
pmf0208	Isoquercitroside	Flavonoid	4290000	4020000	4280000	5480000	5130000	5440000	0.345657	1.27482	0.350295
pmf0216	Catechin gallate，CG	Polyphenol	3110000	3420000	2710000	2000000	1860000	1820000	0.484034	0.614719	-0.702002
pmf0233	Tiliroside	Flavonoid	32500000	33400000	31300000	19300000	21600000	22900000	0.455855	0.656379	-0.6074
pmf0238	Theaflavin-3-gallate	Polyphenol	760000	754000	740000	67000	55200	71700	1.11508	0.0860248	-3.5391
pmf0240	Theaflavin	Polyphenol	782000	723000	753000	67900	57900	66900	1.11661	0.085341	-3.55062
pmf0246	Orientin	Flavonoid	26200	29600	29700	23200	24200	27200	0.225645	0.872515	-0.196749
pmf0260	Sinensetin	Flavonoid	9	9	9	2440	2050	4480	1.70369	332.222	8.376
pmf0265	5,7-Dihydroxychromone	Flavonoid	130000	169000	135000	38200	33500	31400	0.848255	0.237558	-2.07365
pmf0274	Herbacetin	Flavonoid	2500000	2970000	2640000	2770000	3130000	2770000	0.125895	1.06905	0.0963301
pmf0279	Gossypitrin	Flavonoid	27600000	25100000	29600000	38800000	39100000	37100000	0.404187	1.39733	0.48267
pmf0302	Engeletin	Flavonoid	314000	348000	314000	1680000	1570000	1650000	0.903879	5.02049	2.32783
pmf0330	Spinosin	Flavonoid	9	9	9	20400	21600	28700	1.99521	2618.52	11.3545
pmf0344	(-)-Epiafzelechin	Polyphenol	5490	9400	7400	40900	35000	33500	0.894219	4.90803	2.29514
pmf0361	Astilbin	Flavonoid	814000	946000	784000	2070000	2210000	1970000	0.672048	2.45676	1.29676
pmf0362	Hydroxygenkwanin	Flavonoid	37600	27700	32000	50600	42500	46900	0.404458	1.43885	0.524915
pmf0369	Persicoside	Flavonoid	81300	72200	87500	13500	9500	13400	0.976671	0.151037	-2.72702
pmf0371	Pedalitin	Flavonoid	4650000	5700000	4280000	5320000	6490000	4900000	0.181295	1.14217	0.191782
pmf0374	Isorhamnetin 3-O-glucoside	Flavonoid	24600000	20200000	26200000	1910000	1780000	2010000	1.12807	0.0802817	-3.63879
pmf0379	Gallocatechin gallate	Polyphenol	2940000	2270000	2600000	1920000	1750000	2010000	0.374571	0.727273	-0.459432
pmf0382	5,7-Dihydroxy-3',4',5'-trimethoxyflavone	Flavonoid	57900	63900	76200	7000	6020	6160	1.08473	0.0968687	-3.36783
pmf0392	Persicogenin	Flavonoid	14300	13400	10600	4270	3630	5220	0.72609	0.342559	-1.54558
pmf0458	6-Gingerol	Polyphenol	974000	829000	697000	884000	1240000	1130000	0.301808	1.3016	0.380286
pmf0472	Apiin	Flavonoid	7840	9020	6140	9	9	9	1.84688	0.00117391	-9.73446
pmf0550	Diosmin	Flavonoid	69800	43400	22900	53900	53800	9	0.741496	0.791396	-0.337528
pmf0567	Tectorigenin	Flavonoid	5040	3810	5400	2160	9	9	1.3163	0.152842	-2.70989
pmf0583	Phloridzin	Flavonoid	3450000	4400000	4000000	2790000	2810000	2710000	0.404932	0.701266	-0.511967
pmf0615	Petunidin 3, 5-diglucoside	Anthocyanins	25400000	33400000	27100000	122000	72600	102000	1.69548	0.00345285	-8.178
pmf0616	Malvidin 3-acetyl-5-diglucoside	Anthocyanins	28900	45400	45000	9	9	9	2.0589	0.00022632	-12.1093
pmf0617	Peonidin 3-sophoroside-5-glucoside.	Anthocyanins	78800	105000	67900	9	9	9	2.14969	0.000107271	-13.1865
