# Supplementary material for: <span aria-describedby="tippy-17">Transcriptomic and Metabolomic Profiling Provides Insights into Flavonoids Biosynthesis and Flower Coloring in <em>Loropetalum chinense</em> and <em>Loropetalum chinense</em> var. <em>rubrum</em>
Source: Preprints.org preprint supplement (doi:10.20944/preprints202304.0456.v1), 2023-04-18
Supplement: Supplementary file 33 [file supplementary table S7.xlsx]

## Sheet: Table S7 
Supplementary table S7 The differential accumulated metabolites in group of XNFJ VS XNXY
Index	Compounds	Class	XNFJ1	XNFJ2	XNFJ3	XNXY1	XNXY2	XNXY3	VIP	Fold_Change	LogFC
pma0249	Selgin 5-O-hexoside	Flavone	2110000	1050000	1120000	1250000	970000	1510000	0.0955044	0.871495	-0.198435
pma0253	O-methylChrysoeriol 5-O-hexoside	Flavone	38000	29300	21800	396000	226000	248000	1.01777	9.76431	3.28752
pma0760	Selgin O-malonylhexoside	Flavone	119000	129000	125000	5640	4530	5340	1.21687	0.0415818	-4.58791
pma0779	Tricin O-rhamnosyl-O-malonylhexoside	Flavone	4080	7910	5130	9	9	9	1.72639	0.0015771	-9.30851
pma0787	Quercetin-3-(6''-malonyl)-Glucoside	Flavonol	6960	6680	10700	46900	46400	46400	0.90158	5.73952	2.52093
pma1108	Apigenin C-glucoside	Flavone	2720	3380	4290	5660	6800	2040	0.172234	1.39557	0.480857
pma1116	Kaempferide	Flavonol	2370000	2880000	2170000	9	9	9	2.41383	3.63881e-06	-18.0681
pma6218	O-methylnaringenin C-pentoside	Flavone	28000	39500	18300	11100	13400	21600	0.452682	0.537296	-0.896211
pma6389	Ayanin	Flavonol	6440	9110	7650	9020	9050	9850	0.248395	1.20345	0.267174
pma6496	Luteolin 6-C-glucoside	Flavone	6090	3480	3010	7170	9	4550	0.565236	0.932353	-0.101052
pma6515	C-hexosyl-chrysin O-feruloylhexoside	Flavone	8500	11100	7650	9	9	9	1.7924	0.000990826	-9.97908
pma6558	Velutin	Flavone	63000	46800	29100	100000	50200	45500	0.258021	1.40893	0.494597
pma6576	Spinacetin	Flavone	315000	174000	163000	11700	12700	10100	1.15476	0.0529141	-4.2402
pma6638	O-methylChrysoeriol 7-O-hexoside	Flavone	40400	32700	26600	412000	233000	255000	0.9984	9.02708	3.17426
pma6639	Isorhamnetin O-hexoside	Flavonol	46000000	47000000	44200000	2450000	2110000	2330000	1.18011	0.0502187	-4.31563
pma6647	C-hexosyl-chrysoeriol O-hexoside	Flavone	9	9	9	35200	46000	39100	1.97685	4455.56	12.1214
pmb0550	Cyanidin 3-O-glucoside (Kuromanin)	Anthocyanins	196000000	199000000	211000000	5330000	4190000	9470000	1.27464	0.0313366	-4.99601
pmb0563	Peonidin	Anthocyanins	2310000	3620000	3100000	9	9	9	2.4316	2.99003e-06	-18.3514
pmb0565	Syringetin 3-O-hexoside	Flavonol	800000	779000	736000	12300	12500	9540	1.40061	0.0148337	-6.07498
pmb0566	Luteolin O-hexosyl-O-pentoside	Flavone	92800	86200	109000	80700	77600	64900	0.307224	0.775	-0.367732
pmb0576	Apigenin O-malonylhexoside	Flavone	11900	9130	31000	17200	15900	3910	0.231108	0.71132	-0.491429
pmb0579	Chrysoeriol O-sinapoylhexoside	Flavone	50200	35900	53200	9	9	9	1.99282	0.000193826	-12.3329
pmb0580	Chrysin 5-O-glucoside (Toringin)	Flavone	355000	312000	318000	144000	139000	81300	0.669031	0.369848	-1.435
pmb0588	Luteolin 3',7-di-O-glucoside	Flavone	290000	240000	271000	1660000	1660000	1660000	0.922266	6.21723	2.63627
pmb0592	Chrysoeriol O-hexosyl-O-rutinoside	Flavone	32500	29700	22800	33400	32600	31700	0.199907	1.14941	0.200896
pmb0595	Isorhamnetin 5-O-hexoside	Flavonol	7590000	9440000	8280000	527000	412000	479000	1.15725	0.0560253	-4.15778
pmb0600	Chrysoeriol 7-O-rutinoside	Flavone	4310000	5010000	4780000	9	9	9	2.47553	1.91489e-06	-18.9943
pmb0602	Syringetin 7-O-hexoside	Flavone	14800000	16300000	14200000	687000	600000	757000	1.20079	0.0451214	-4.47004
pmb0604	Kaempferol 3-O-glucoside (Astragalin)	Flavonol	7800000	8290000	7450000	10400000	10700000	10600000	0.368589	1.34664	0.429369
pmb0618	8-C-hexosyl-hesperetin O-hexoside	Flavone	3940000	4110000	3430000	25900000	29000000	32000000	0.968957	7.56969	2.92023
pmb0622	C-hexosyl-luteolin O-hexoside	Flavone	9	9	9	1760	1290	2970	1.57445	222.963	7.80066
pmb0624	6-C-hexosyl-luteolin O-hexoside	Flavone	17100	15100	14800	106000	93600	97800	0.926035	6.32766	2.66167
pmb0628	Eriodictiol C-hexosyl-O-hexoside	Flavone	315000	295000	251000	2480000	2620000	2240000	0.997935	8.52497	3.09169
pmb0629	Chrysoeriol 6-C-hexoside	Flavone	112000	99200	108000	9	9	9	2.08926	8.45865e-05	-13.5292
pmb0645	6-C-hexosyl-hesperetin O-hexoside	Flavone	8920000	8330000	6900000	8360000	7430000	7400000	0.0590912	0.960248	-0.0585204
pmb0647	8-C-hexosyl-luteolin O-pentoside	Flavone	20200	18000	29400	20200	18000	14000	0.25364	0.772189	-0.372973
pmb0653	di-C,C-hexosyl-apigenin	Flavone	505000	452000	494000	9	9	9	2.25167	1.86079e-05	-15.7137
pmb0660	C-hexosyl-luteolin O-p-coumaroylhexoside	Flavone	16000	17300	13400	10100	11900	8920	0.411337	0.662099	-0.594882
pmb0663	8-C-hexosyl-luteolin O-hexoside	Flavone	139000	142000	119000	45600	52300	34600	0.710908	0.33125	-1.59401
pmb0665	Luteolin 8-C-hexosyl-O-hexoside	Flavone	189000	220000	182000	2180000	1930000	2090000	1.04566	10.4907	3.39104
pmb0689	Chrysoeriol C-hexoside	Flavone	8910	10300	15300	8090	7700	16200	0.0978092	0.926978	-0.109393
pmb0696	8-C-hexosyl chrysoeriol O-hexoside	Flavone	35800000	66200000	47500000	9	9	9	2.6855	1.80602e-07	-22.4007
pmb0711	Quercetin 7-O-rutinoside	Flavonol	5810000	6370000	5720000	42500000	41100000	43500000	0.95513	7.10056	2.82793
pmb0713	Tricin 7-O-hexosyl-O-hexoside	Flavone	1820000	1920000	1750000	9	9	9	2.38532	4.91803e-06	-17.6335
pmb0724	Tricin O-rhamnoside	Flavone	187000	173000	184000	297000	242000	272000	0.419094	1.49081	0.576095
pmb0725	Tricin 7-O-feruloylhexoside	Flavone	5900	5770	4030	16400	12700	16400	0.693075	2.89809	1.5351
pmb0732	Tricin 5-O-feruloylhexoside	Flavone	37900	36300	27200	26200	31700	35500	0.101611	0.921105	-0.118563
pmb0739	Tricin O-hexosyl-O-syringin alcohol	Flavone	13600	8020	7980	221000	232000	222000	1.20901	22.8041	4.51122
pmb0746	Tricin 4'-O-β-guaiacylglycerol	Flavone	3200	2560	2090	4430	4060	5450	0.490257	1.7758	0.828466
pmb0835	Gallocatechin-gallocatechin	Polyphenol	15300000	14500000	16800000	597000	489000	445000	1.26106	0.0328541	-4.92778
pmb2831	Protocatechuic acid O-glucoside	Polyphenol	7920000	8000000	7370000	3750000	4300000	5020000	0.510247	0.561185	-0.833451
pmb2850	Tricin	Flavone	111000	159000	169000	805000	916000	734000	0.89212	5.59226	2.48343
pmb2947	Catechin-catechin-catechin	Polyphenol	233000	211000	244000	721000	702000	640000	0.713333	2.99855	1.58426
pmb2957	Cyanidin O-syringic acid	Anthocyanins	9	9	9	149000	122000	307000	2.1439	21407.4	14.3858
pmb2975	Hesperetin O-Glucuronic acid	Flavanone	85900	56500	105000	9	9	9	2.0564	0.000109135	-13.1616
pmb2979	Hesperetin O-malonylhexoside	Flavanone	2010000	1570000	2060000	470000	473000	415000	0.808847	0.24078	-2.05421
pmb2983	Chrysoeriol C-pentosyl-O-rhamnosyl-rhamnoside	Flavone	1040	2130	1270	4970	5000	4760	0.740683	3.31757	1.73013
pmb2987	Acacetin O-acetyl hexoside	Flavone	15700	21000	23500	48100	40100	44900	0.596738	2.21096	1.14468
pmb2992	Acacetin O-glucuronic acid	Flavone	27500	23300	32400	9	9	9	1.93248	0.000324519	-11.5894
pmb2999	Chrysoeriol 5-O-hexoside	Flavone	199000	191000	198000	130000	149000	114000	0.421501	0.668367	-0.581287
pmb3006	Apigenin 7-O-glucoside (Cosmosiin)	Flavone	40500	31300	39100	52600	38700	49000	0.273287	1.2651	0.339256
pmb3013	Isorhamnetin O-acetyl-hexoside	Flavonol	152000	133000	150000	5950	7850	9560	1.16734	0.0537011	-4.2189
pmb3014	Luteolin O-eudesmic acid-O-hexoside	Flavone	21900	32900	20700	72500	65800	74200	0.687416	2.81457	1.49291
pmb3023	Eriodictyol C-hexoside	Flavone	6070000	4670000	5960000	5300000	5170000	4350000	0.161961	0.887425	-0.172303
pmb3026	Quercetin O-acetylhexoside	Flavonol	625000	451000	444000	305000	292000	209000	0.512823	0.530263	-0.91522
pmb3037	Tricin O-malonyl shikimic acid	Flavone	1050	1830	1780	908	1510	1310	0.203494	0.8	-0.321928
pmb3041	Tricin O-saccharic acid	Flavone	682000	582000	649000	2580000	3180000	2560000	0.823662	4.34919	2.12075
pmb3046	Tricin 7-O-hexoside	Flavone	73800	67100	71800	50800	56100	62800	0.302886	0.797837	-0.325833
pmb3047	Tricin 4'-O-(syringyl alcohol) ether 5-O-hexoside	Flavone	27300	27100	34500	41400	41200	36900	0.347854	1.34421	0.426755
pmb3114	Epicatechin-epiafzelechin	Polyphenol	16600	15600	17000	94500	88600	76000	0.876988	5.26626	2.39678
pmb3894	Di-O-methylquercetin	Flavonol	138000	151000	160000	337000	298000	308000	0.584576	2.10022	1.07054
pmc1990	4'-Hydroxy-5,7-dimethoxyflavanone	Flavanone	1930000	1690000	1880000	1590000	1320000	1660000	0.257765	0.830909	-0.267237
pme0001	Hesperetin 7-O-neohesperidoside (Neohesperidin)	Flavanone	278000	307000	816000	1040000	835000	711000	0.490359	1.84582	0.884265
pme0088	Luteolin	Flavone	140000	213000	169000	213000	204000	224000	0.259923	1.22797	0.296275
pme0197	Quercetin 3-O-rutinoside (Rutin)	Flavonol	1630000	1460000	1690000	14100000	12900000	12600000	0.991628	8.28452	3.05042
pme0200	Kaempferol	Flavonol	7960000	22800000	24700000	60000000	63800000	57100000	0.7246	3.26181	1.70567
pme0205	Catechin	Polyphenol	1620000	1560000	1770000	5750000	4520000	5110000	0.721902	3.10707	1.63556
pme0208	Amentoflavone	Flavone	68800	105000	83800	164000	150000	147000	0.50518	1.7896	0.839634
pme0324	Chrysin	Flavone	2730	4310	1310	6660	6500	4140	0.528059	2.07186	1.05092
pme0333	Apigenin 7-O-neohesperidoside (Rhoifolin)	Flavone	85100	82100	66600	272000	277000	253000	0.755789	3.43028	1.77833
pme0355	Daidzein	Isoflavone	16700	20100	19800	28800	16700	20000	0.139454	1.15724	0.210693
pme0361	Quercetin 3-alpha-L-arabinofuranoside (Avicularin)	Flavonol	9680000	12000000	11300000	23300000	21700000	20900000	0.563042	1.99818	0.998687
pme0363	Chrysoeriol	Flavone	34100	60400	59800	88100	73100	109000	0.463332	1.75113	0.80829
pme0367	Apigenin 7-rutinoside (Isorhoifolin)	Flavone	52500	33700	50900	9	9	9	1.99023	0.000196937	-12.31
pme0369	Kaempferol 3-O-rutinoside (Nicotiflorin)	Flavonol	1690000	1490000	1830000	5790000	5750000	5170000	0.747043	3.33533	1.73783
pme0372	Naringenin 7-O-glucoside (Prunin)	Flavanone	9	9	9	14100000	8520000	15800000	2.56473	1.42296e+06	20.4405
pme0376	Naringenin	Flavanone	1820000	2220000	1820000	665000	610000	663000	0.713517	0.330717	-1.59633
pme0379	Apigenin	Flavone	30900	38200	29300	150000	180000	144000	0.852167	4.81707	2.26816
pme0431	Procyanidin A1	Proanthocyanidins	29200	22300	23900	65000	86600	75600	0.708862	3.01326	1.59133
pme0434	Procyanidin B2	Proanthocyanidins	3660000	3220000	3840000	10100000	8490000	8180000	0.64683	2.4972	1.32031
pme0436	Procyanidin B3	Proanthocyanidins	4000000	3590000	4010000	10200000	9220000	8920000	0.642388	2.4431	1.28871
pme0442	Delphinidin	Anthocyanins	9	9	9	201000	318000	191000	2.17318	26296.3	14.6826
pme0450	L-Epicatechin	Polyphenol	9250000	8500000	9630000	40800000	38300000	36000000	0.816593	4.2038	2.07169
pme1201	Phloretin	Flavanone	283000	334000	296000	445000	432000	401000	0.385531	1.39978	0.485201
pme1398	Delphinidin 3-O-glucoside (Mirtillin)	Anthocyanins	37400000	37100000	42800000	231000	153000	301000	1.55029	0.00583973	-7.41988
pme1478	Myricetin	Flavonol	8680000	15300000	11400000	15400000	17600000	11200000	0.22772	1.24929	0.321112
pme1486	Epigallate catechin gallate (EGCG)	Polyphenol	19100000	19400000	21800000	40000000	38000000	47600000	0.576528	2.08292	1.05861
pme1500	Kumatakenin	Flavonol	73100	83800	47500	75200	58100	39300	0.163511	0.844423	-0.243963
pme1506	Kaempferol 7-O-rhamnoside	Flavonol	3440000	4050000	3660000	7950000	8000000	8040000	0.595831	2.15157	1.10539
pme1510	Baicalein (5,6,7-Trihydroxyflavone)	Flavone	12500	12000	12600	15600	12700	14800	0.22689	1.16173	0.216269
pme1514	Epigallocatechin (EGC)	Polyphenol	2880000	2470000	2730000	8240000	6710000	7620000	0.687389	2.79332	1.48198
pme1518	Nobiletin	Flavone	73500	43300	54300	94200	106000	60200	0.359845	1.52192	0.60589
pme1521	Dihydroquercetin (Taxifolin)	Flavonol	829000	787000	821000	2170000	1480000	1580000	0.576618	2.14608	1.1017
pme1535	(+)-Gallocatechin (GC)	Polyphenol	2530000	2290000	2340000	4410000	4410000	4630000	0.540462	1.87849	0.909575
pme1539	Isorhamnetin 3-O-neohesperidoside	Flavonol	1110000	1140000	1290000	363000	336000	447000	0.721048	0.323729	-1.62714
pme1541	Acacetin	Flavone	44300	47200	71800	165000	132000	140000	0.666165	2.67606	1.42011
pme1550	Tangeretin	Flavone	44400	24500	30100	72700	73300	42500	0.486692	1.90404	0.929064
pme1552	Myricetin 3-O-rhamnoside (Myricitrin)	Flavonol	1470000	1760000	2230000	1720000	1680000	1710000	0.0708593	0.935897	-0.0955777
pme1562	Epicatechin gallate (ECG)	Polyphenol	13200000	12700000	13200000	46200000	47000000	47100000	0.771183	3.58824	1.84327
pme1568	Orobol (5,7,3',4'-tetrahydroxyisoflavone)	Isoflavone	35000	38500	30700	56700	47100	59900	0.438706	1.57102	0.651699
pme1580	Eriodictyol	Flavanone	6260000	7130000	7410000	14700000	9800000	11400000	0.473262	1.72596	0.7874
pme1588	Isorhamnetin	Flavonol	24100000	47900000	50900000	11000000	12700000	9970000	0.734223	0.273963	-1.86795
pme1598	Hesperetin 5-O-glucoside	Flavanone	2100000	2030000	1980000	2280000	2070000	2690000	0.203785	1.15221	0.204403
pme1599	7-O-Methyleriodictyol	Flavanone	1530000	1440000	1780000	645000	602000	638000	0.651281	0.396842	-1.33336
pme1605	Kaempferol 3-O-robinobioside (Biorobin)	Flavonol	1570000	1300000	1760000	6060000	5830000	5380000	0.780789	3.73002	1.89918
pme1611	Isohemiphloin	Flavone	141000	88000	117000	276000	321000	252000	0.633844	2.45376	1.29499
pme1624	Isovitexin	Flavone	3520	4000	4480	4110	3520	6250	0.13131	1.15667	0.209973
pme1662	sakuranetin	Flavone	13700	6020	12400	6560	6200	7750	0.328504	0.638543	-0.647144
pme1773	Cyanidin 3-O-rutinoside (Keracyanin)	Anthocyanins	146000	144000	169000	313000	260000	259000	0.51632	1.81264	0.858089
pme1777	Cyanidin 3,5-O-diglucoside (Cyanin)	Anthocyanins	17900000	16400000	19300000	444000	381000	345000	1.33422	0.0218284	-5.51765
pme1793	Pelargonin	Anthocyanins	17700000	17800000	18700000	93500	122000	97100	1.54982	0.00576753	-7.43783
pme1824	Protocatechuic acid	Polyphenol	520000	656000	618000	1490000	1340000	1800000	0.654564	2.58082	1.36783
pme2247	Ellagic acid	Polyphenol	284000	165000	233000	193000	137000	162000	0.304913	0.721408	-0.471113
pme2319	Hesperetin	Flavanone	211000	143000	166000	77000	72600	67900	0.621149	0.418269	-1.2575
pme2457	Luteolin 7-O-glucoside (Cynaroside)	Flavone	124000	113000	78200	47500	59000	39400	0.566871	0.462881	-1.11129
pme2478	Protocatechuic aldehyde	Polyphenol	54500	69200	61100	48000	57500	54000	0.208238	0.863095	-0.212408
pme2493	Kaempferol 3,7-dirhamnoside (Kaempferitrin)	Flavonol	166000	128000	162000	589000	531000	550000	0.77558	3.66228	1.87274
pme2898	Dihydromyricetin	Flavonol	1510000	1260000	1510000	1010000	969000	895000	0.416854	0.671495	-0.574551
pme2949	Hesperetin 7-rutinoside (Hesperidin)	Flavanone	269000	339000	763000	1230000	948000	649000	0.521898	2.062	1.04404
pme2954	Quercetin	Flavonol	7120000	17200000	22100000	47200000	51600000	41400000	0.696958	3.02025	1.59467
pme2957	Naringenin chalcone	Flavanone	2960000	3790000	3140000	1130000	952000	1140000	0.716766	0.325784	-1.61801
pme2963	Aromadedrin (Dihydrokaempferol)	Flavonol	674000	736000	683000	1590000	1570000	1440000	0.603713	2.1978	1.13606
pme2982	Pinocembrin (Dihydrochrysin)	Flavanone	40000	52600	36000	18500	17400	15300	0.639366	0.398134	-1.32867
pme2984	Isosakuranetin-7-neohesperidoside (Poncirin)	Flavanone	6140000	6660000	5580000	4080000	3980000	3870000	0.440716	0.649075	-0.623543
pme3130	Quercetin 4'-O-glucoside (Spiraeoside)	Flavonol	4260000	4030000	3940000	4500000	4340000	4310000	0.16536	1.07522	0.104638
pme3208	Glycitin	Isoflavone	9	9	9	10200	8180	7900	1.78867	973.333	9.92679
pme3211	Quercetin 3-O-glucoside (Isotrifoliin)	Flavonol	2090000	1830000	1990000	2270000	2070000	2250000	0.195287	1.11506	0.15712
pme3215	Isoliquiritigenin	Flavanone	4380	5490	4600	4590	4230	3650	0.205652	0.861783	-0.214603
pme3268	Kaempferol 3-O-galactoside (Trifolin)	Flavonol	5210000	6250000	5090000	6600000	6610000	6400000	0.254012	1.18489	0.244758
pme3276	2'-Hydroxygenistein	Isoflavone	13800	30100	18300	10600	10100	18800	0.348892	0.635048	-0.655062
pme3285	Afzelechin (3,5,7,4'-Tetrahydroxyflavan)	Flavanone	8290	7120	6820	9540	10600	6820	0.209375	1.21278	0.278313
pme3288	3,7-Di-O-methylquercetin	Flavonol	23100	42100	26500	3680	6230	7890	0.85226	0.194111	-2.36504
pme3292	Prunetin	Isoflavone	44500	38400	69100	156000	126000	133000	0.672131	2.73026	1.44904
pme3296	Kaempferol 3-O-rhamnoside (Kaempferin)	Flavonol	16800000	14500000	15100000	31900000	30000000	31100000	0.567009	2.00431	1.00311
pme3303	Tricetin	Flavone	306000	330000	349000	5870000	5910000	4630000	1.14224	16.6599	4.05831
pme3369	Rhamnetin (7-O-methxyl quercetin)	Flavonol	83400	175000	116000	90300	92700	170000	0.0511136	0.942842	-0.0849123
pme3391	Petunidin 3-O-glucoside	Anthocyanins	5470000	5140000	4850000	9	9	9	2.48425	1.74644e-06	-19.1271
pme3392	Pelargonidin 3-O-beta-D-glucoside（Callistephin chloride)	Anthocyanins	81700000	79400000	82200000	92300	82400	113000	1.77217	0.00118249	-9.72396
pme3399	Sissotrin	Isoflavone	96600	117000	131000	235000	196000	341000	0.575739	2.24028	1.16368
pme3401	Syringetin	Flavonol	2010000	3950000	4040000	348000	431000	340000	0.987789	0.1119	-3.15972
pme3407	Laricitrin	Flavonol	359000	476000	446000	147000	135000	116000	0.730572	0.310695	-1.68643
pme3442	Quercetin 7-O-β-D-Glucuronide	Flavonol	243000	181000	213000	228000	263000	226000	0.174354	1.12559	0.17068
pme3461	Homoeriodictyol	Flavanone	919000	1440000	1310000	4720000	4020000	2450000	0.683724	3.04988	1.60875
pme3464	Isosakuranetin (4'-Methylnaringenin)	Flavanone	67100	224000	252000	81300	57900	104000	0.436175	0.4478	-1.15907
pme3473	Butin	Flavone	3210000	3710000	3070000	1100000	1110000	1100000	0.714138	0.331331	-1.59365
pme3484	Myricetin 3-O-galactoside	Flavonol	5550000	4620000	4420000	8230000	8430000	8520000	0.498306	1.72584	0.787298
pme3502	Formononetin 7-O-glucoside (Ononin)	Isoflavone	52200	35300	49800	53400	78000	64200	0.349135	1.42462	0.510575
pme3509	7,4'-Dihydroxyflavone	Flavone	16100	6040	14100	10700	8360	12300	0.0615817	0.865342	-0.208657
pme3514	Morin	Flavonol	556000	1320000	1360000	3080000	3320000	2510000	0.662529	2.7534	1.46121
pmf0011	Apigenin 6,8-C-diglucoside	Flavone	3320	2670	3520	9	9	9	1.65097	0.00283912	-8.46034
pmf0012	6,8-di-C-glucoside Apigenine	Flavone	7870	7360	7520	18900	17400	16100	0.620324	2.3033	1.2037
pmf0027	Cyanidin 3-O-galactoside	Anthocyanins	22300000	22500000	24200000	146000	140000	283000	1.49964	0.00824638	-6.92202
pmf0057	4,2',4',6'-Tetrahydroxychalcone	Flavone	1380000	1570000	1410000	2040000	1900000	1740000	0.334024	1.30275	0.381563
pmf0058	4',5,7-Trihydroxyflavanone	Flavanone	1530000	1790000	1550000	2360000	2100000	1990000	0.341589	1.32444	0.405377
pmf0109	3-O-Acetylpinobanksin	Flavonoid	26700	74400	24800	104000	113000	64200	0.565038	2.23352	1.15932
pmf0115	Galangin	Flavonoid	2120	6890	6840	33100	39100	27200	0.916828	6.27129	2.64876
pmf0179	Narcissoside	Flavonoid	9090000	7040000	8990000	2140000	2680000	2720000	0.741629	0.300159	-1.7362
pmf0204	Hyperoside	Flavonoid	4790000	4680000	4210000	5000000	4930000	5040000	0.179006	1.0943	0.130006
pmf0208	Isoquercitroside	Flavonoid	4920000	5030000	4690000	5480000	5130000	5440000	0.189901	1.09631	0.132658
pmf0216	Catechin gallate，CG	Polyphenol	424000	440000	432000	2000000	1860000	1820000	0.828855	4.38272	2.13183
pmf0233	Tiliroside	Flavonoid	35300000	36400000	33400000	19300000	21600000	22900000	0.477079	0.607041	-0.720134
pmf0238	Theaflavin-3-gallate	Polyphenol	153000	183000	184000	67000	55200	71700	0.671869	0.372885	-1.4232
pmf0240	Theaflavin	Polyphenol	147000	181000	177000	67900	57900	66900	0.6642	0.381584	-1.38993
pmf0246	Orientin	Flavonoid	17700	18500	21500	23200	24200	27200	0.321978	1.29289	0.370604
pmf0260	Sinensetin	Flavonoid	1540	1710	1460	2440	2050	4480	0.459707	1.90446	0.929381
pmf0265	5,7-Dihydroxychromone	Flavonoid	53300	45700	58900	38200	33500	31400	0.425028	0.652945	-0.614967
pmf0274	Herbacetin	Flavonoid	535000	1290000	1430000	2770000	3130000	2770000	0.652939	2.66359	1.41337
pmf0279	Gossypitrin	Flavonoid	35000000	35100000	32700000	38800000	39100000	37100000	0.216141	1.11868	0.161794
pmf0302	Engeletin	Flavonoid	825000	787000	845000	1680000	1570000	1650000	0.565903	1.9943	0.995884
pmf0330	Spinosin	Flavonoid	4400	5850	6150	20400	21600	28700	0.816199	4.31098	2.10801
pmf0344	(-)-Epiafzelechin	Polyphenol	8000	5390	5840	40900	35000	33500	0.89727	5.68903	2.50818
pmf0361	Astilbin	Flavonoid	186000	260000	268000	2070000	2210000	1970000	1.00464	8.7535	3.12986
pmf0362	Hydroxygenkwanin	Flavonoid	9090	17400	11700	50600	42500	46900	0.77154	3.66588	1.87416
pmf0369	Persicoside	Flavonoid	393000	303000	289000	13500	9500	13400	1.23721	0.0369543	-4.75811
pmf0371	Pedalitin	Flavonoid	2100000	2750000	2730000	5320000	6490000	4900000	0.593256	2.20449	1.14044
pmf0374	Isorhamnetin 3-O-glucoside	Flavonoid	90500000	82500000	93600000	1910000	1780000	2010000	1.33768	0.0213803	-5.54757
pmf0379	Gallocatechin gallate	Polyphenol	972000	764000	716000	1920000	1750000	2010000	0.619332	2.31648	1.21193
pmf0382	5,7-Dihydroxy-3',4',5'-trimethoxyflavone	Flavonoid	9140	4850	6200	7000	6020	6160	0.0209954	0.949975	-0.0740382
pmf0392	Persicogenin	Flavonoid	1880	5720	6010	4270	3630	5220	0.0574426	0.963997	-0.0528993
pmf0458	6-Gingerol	Polyphenol	2320000	1700000	1380000	884000	1240000	1130000	0.43012	0.602593	-0.730745
pmf0472	Apiin	Flavonoid	5160	4290	7270	9	9	9	1.72566	0.00161483	-9.2744
pmf0550	Diosmin	Flavonoid	5220000	6220000	5530000	53900	53800	9	1.66977	0.00634702	-7.2997
pmf0567	Tectorigenin	Flavonoid	2640	3650	1650	2160	9	9	1.12846	0.274307	-1.86614
pmf0583	Phloridzin	Flavonoid	1580000	1630000	1630000	2790000	2810000	2710000	0.50124	1.71694	0.779841
pmf0615	Petunidin 3, 5-diglucoside	Anthocyanins	7380000	6460000	6300000	122000	72600	102000	1.40265	0.0147269	-6.0854
pmf0616	Malvidin 3-acetyl-5-diglucoside	Anthocyanins	10800	15100	14500	9	9	9	1.84311	0.000668317	-10.5472
pmf0617	Peonidin 3-sophoroside-5-glucoside.	Anthocyanins	79800	63300	59100	9	9	9	2.03676	0.000133531	-12.8705
