# Supplementary material for: <span aria-describedby="tippy-17">Transcriptomic and Metabolomic Profiling Provides Insights into Flavonoids Biosynthesis and Flower Coloring in <em>Loropetalum chinense</em> and <em>Loropetalum chinense</em> var. <em>rubrum</em>
Source: Preprints.org preprint supplement (doi:10.20944/preprints202304.0456.v1), 2023-04-18
Supplement: Supplementary file 34 [file supplementary table S8.xlsx]

## Sheet: Table S8
Supplementary table S8 The differential accumulated flavonoid metabolites in all groups of L. chinense and L. chinense var. rubrum
Index	Compounds	Class	MLRRF	MLPF	MLWF	MLDPF
pma0249	Selgin 5-O-hexoside	Flavone	TRUE	TRUE	TRUE	TRUE
pma0253	O-methylChrysoeriol 5-O-hexoside	Flavone	TRUE	TRUE	TRUE	TRUE
pma0760	Selgin O-malonylhexoside	Flavone	TRUE	TRUE	TRUE	TRUE
pma0787	Quercetin-3-(6''-malonyl)-Glucoside	Flavonol	TRUE	TRUE	TRUE	TRUE
pma1108	Apigenin C-glucoside	Flavone	TRUE	TRUE	TRUE	TRUE
pma1116	Kaempferide	Flavonol	TRUE	TRUE	FALSE	TRUE
pma6218	O-methylnaringenin C-pentoside	Flavone	TRUE	TRUE	TRUE	TRUE
pma6389	Ayanin	Flavonol	TRUE	TRUE	FALSE	TRUE
pma6496	Luteolin 6-C-glucoside	Flavone	TRUE	TRUE	TRUE	TRUE
pma6558	Velutin	Flavone	TRUE	TRUE	TRUE	TRUE
pma6576	Spinacetin	Flavone	TRUE	TRUE	TRUE	TRUE
pma6638	O-methylChrysoeriol 7-O-hexoside	Flavone	TRUE	TRUE	TRUE	TRUE
pma6639	Isorhamnetin O-hexoside	Flavonol	TRUE	TRUE	TRUE	TRUE
pma6647	C-hexosyl-chrysoeriol O-hexoside	Flavone	FALSE	FALSE	TRUE	TRUE
pmb0550	Cyanidin 3-O-glucoside (Kuromanin)	Anthocyanins	TRUE	TRUE	TRUE	TRUE
pmb0563	Peonidin	Anthocyanins	TRUE	TRUE	FALSE	TRUE
pmb0565	Syringetin 3-O-hexoside	Flavonol	TRUE	TRUE	TRUE	TRUE
pmb0566	Luteolin O-hexosyl-O-pentoside	Flavone	TRUE	TRUE	TRUE	TRUE
pmb0576	Apigenin O-malonylhexoside	Flavone	TRUE	TRUE	TRUE	TRUE
pmb0580	Chrysin 5-O-glucoside (Toringin)	Flavone	TRUE	TRUE	TRUE	TRUE
pmb0588	"Luteolin 3',7-di-O-glucoside"	Flavone	TRUE	TRUE	TRUE	TRUE
pmb0592	Chrysoeriol O-hexosyl-O-rutinoside	Flavone	TRUE	TRUE	TRUE	TRUE
pmb0595	Isorhamnetin 5-O-hexoside	Flavonol	TRUE	TRUE	TRUE	TRUE
pmb0602	Syringetin 7-O-hexoside	Flavone	TRUE	TRUE	TRUE	TRUE
pmb0604	Kaempferol 3-O-glucoside (Astragalin)	Flavonol	TRUE	TRUE	TRUE	TRUE
pmb0618	8-C-hexosyl-hesperetin O-hexoside	Flavone	TRUE	TRUE	TRUE	TRUE
pmb0624	6-C-hexosyl-luteolin O-hexoside	Flavone	TRUE	TRUE	TRUE	TRUE
pmb0628	Eriodictiol C-hexosyl-O-hexoside	Flavone	TRUE	TRUE	TRUE	TRUE
pmb0629	Chrysoeriol 6-C-hexoside	Flavone	TRUE	TRUE	FALSE	TRUE
pmb0645	6-C-hexosyl-hesperetin O-hexoside	Flavone	TRUE	TRUE	TRUE	TRUE
pmb0647	8-C-hexosyl-luteolin O-pentoside	Flavone	TRUE	FALSE	TRUE	TRUE
pmb0653	"di-C,C-hexosyl-apigenin"	Flavone	TRUE	TRUE	FALSE	TRUE
pmb0660	C-hexosyl-luteolin O-p-coumaroylhexoside	Flavone	TRUE	TRUE	TRUE	TRUE
pmb0663	8-C-hexosyl-luteolin O-hexoside	Flavone	TRUE	TRUE	TRUE	TRUE
pmb0665	Luteolin 8-C-hexosyl-O-hexoside	Flavone	TRUE	TRUE	TRUE	TRUE
pmb0689	Chrysoeriol C-hexoside	Flavone	TRUE	TRUE	TRUE	TRUE
pmb0696	8-C-hexosyl chrysoeriol O-hexoside	Flavone	TRUE	TRUE	FALSE	TRUE
pmb0711	Quercetin 7-O-rutinoside	Flavonol	TRUE	TRUE	TRUE	TRUE
pmb0713	Tricin 7-O-hexosyl-O-hexoside	Flavone	TRUE	TRUE	FALSE	TRUE
pmb0724	Tricin O-rhamnoside	Flavone	TRUE	TRUE	TRUE	TRUE
pmb0725	Tricin 7-O-feruloylhexoside	Flavone	TRUE	TRUE	TRUE	TRUE
pmb0732	Tricin 5-O-feruloylhexoside	Flavone	TRUE	TRUE	TRUE	TRUE
pmb0739	Tricin O-hexosyl-O-syringin alcohol	Flavone	TRUE	TRUE	TRUE	TRUE
pmb0746	Tricin 4'-O-β-guaiacylglycerol	Flavone	TRUE	TRUE	TRUE	TRUE
pmb0835	Gallocatechin-gallocatechin	Polyphenol	TRUE	TRUE	TRUE	TRUE
pmb2831	Protocatechuic acid O-glucoside	Polyphenol	TRUE	TRUE	TRUE	TRUE
pmb2850	Tricin	Flavone	TRUE	TRUE	TRUE	TRUE
pmb2947	Catechin-catechin-catechin	Polyphenol	TRUE	TRUE	TRUE	TRUE
pmb2957	Cyanidin O-syringic acid	Anthocyanins	FALSE	TRUE	TRUE	TRUE
pmb2975	Hesperetin O-Glucuronic acid	Flavanone	TRUE	TRUE	FALSE	TRUE
pmb2979	Hesperetin O-malonylhexoside	Flavanone	TRUE	TRUE	TRUE	TRUE
pmb2983	Chrysoeriol C-pentosyl-O-rhamnosyl-rhamnoside	Flavone	TRUE	TRUE	TRUE	TRUE
pmb2987	Acacetin O-acetyl hexoside	Flavone	TRUE	TRUE	TRUE	TRUE
pmb2992	Acacetin O-glucuronic acid	Flavone	TRUE	TRUE	FALSE	TRUE
pmb2999	Chrysoeriol 5-O-hexoside	Flavone	TRUE	TRUE	TRUE	TRUE
pmb3006	Apigenin 7-O-glucoside (Cosmosiin)	Flavone	TRUE	TRUE	TRUE	TRUE
pmb3013	Isorhamnetin O-acetyl-hexoside	Flavonol	TRUE	TRUE	TRUE	TRUE
pmb3014	Luteolin O-eudesmic acid-O-hexoside	Flavone	TRUE	TRUE	TRUE	TRUE
pmb3023	Eriodictyol C-hexoside	Flavone	TRUE	TRUE	TRUE	TRUE
pmb3026	Quercetin O-acetylhexoside	Flavonol	TRUE	TRUE	TRUE	TRUE
pmb3037	Tricin O-malonyl shikimic acid	Flavone	TRUE	TRUE	TRUE	TRUE
pmb3041	Tricin O-saccharic acid	Flavone	TRUE	TRUE	TRUE	TRUE
pmb3046	Tricin 7-O-hexoside	Flavone	TRUE	TRUE	TRUE	TRUE
pmb3047	Tricin 4'-O-(syringyl alcohol) ether 5-O-hexoside	Flavone	TRUE	TRUE	TRUE	TRUE
pmb3114	Epicatechin-epiafzelechin	Polyphenol	TRUE	TRUE	TRUE	TRUE
pmb3894	Di-O-methylquercetin	Flavonol	TRUE	TRUE	TRUE	TRUE
pmc1990	"4'-Hydroxy-5,7-dimethoxyflavanone"	Flavanone	TRUE	TRUE	TRUE	TRUE
pme0001	Hesperetin 7-O-neohesperidoside (Neohesperidin)	Flavanone	TRUE	TRUE	TRUE	TRUE
pme0088	Luteolin	Flavone	TRUE	TRUE	TRUE	TRUE
pme0197	Quercetin 3-O-rutinoside (Rutin)	Flavonol	TRUE	TRUE	TRUE	TRUE
pme0200	Kaempferol	Flavonol	TRUE	TRUE	TRUE	TRUE
pme0205	Catechin	Polyphenol	TRUE	TRUE	TRUE	TRUE
pme0208	Amentoflavone	Flavone	TRUE	TRUE	TRUE	TRUE
pme0324	Chrysin	Flavone	TRUE	TRUE	TRUE	TRUE
pme0333	Apigenin 7-O-neohesperidoside (Rhoifolin)	Flavone	TRUE	TRUE	TRUE	TRUE
pme0355	Daidzein	Isoflavone	TRUE	TRUE	TRUE	TRUE
pme0361	Quercetin 3-alpha-L-arabinofuranoside (Avicularin)	Flavonol	TRUE	TRUE	TRUE	TRUE
pme0363	Chrysoeriol	Flavone	TRUE	TRUE	TRUE	TRUE
pme0369	Kaempferol 3-O-rutinoside (Nicotiflorin)	Flavonol	TRUE	TRUE	TRUE	TRUE
pme0372	Naringenin 7-O-glucoside (Prunin)	Flavanone	FALSE	TRUE	TRUE	TRUE
pme0376	Naringenin	Flavanone	TRUE	TRUE	TRUE	TRUE
pme0379	Apigenin	Flavone	TRUE	TRUE	TRUE	TRUE
pme0431	Procyanidin A1	Proanthocyanidins	TRUE	TRUE	TRUE	TRUE
pme0434	Procyanidin B2	Proanthocyanidins	TRUE	TRUE	TRUE	TRUE
pme0436	Procyanidin B3	Proanthocyanidins	TRUE	TRUE	TRUE	TRUE
pme0442	Delphinidin	Anthocyanins	FALSE	TRUE	TRUE	TRUE
pme0450	L-Epicatechin	Polyphenol	TRUE	TRUE	TRUE	TRUE
pme1201	Phloretin	Flavanone	TRUE	TRUE	TRUE	TRUE
pme1398	Delphinidin 3-O-glucoside (Mirtillin)	Anthocyanins	TRUE	TRUE	TRUE	TRUE
pme1478	Myricetin	Flavonol	TRUE	TRUE	TRUE	TRUE
pme1486	Epigallate catechin gallate (EGCG)	Polyphenol	TRUE	TRUE	TRUE	TRUE
pme1500	Kumatakenin	Flavonol	TRUE	TRUE	TRUE	TRUE
pme1506	Kaempferol 7-O-rhamnoside	Flavonol	TRUE	TRUE	TRUE	TRUE
pme1510	"Baicalein (5,6,7-Trihydroxyflavone)"	Flavone	TRUE	TRUE	TRUE	TRUE
pme1514	Epigallocatechin (EGC)	Polyphenol	TRUE	TRUE	TRUE	TRUE
pme1518	Nobiletin	Flavone	TRUE	TRUE	TRUE	TRUE
pme1521	Dihydroquercetin (Taxifolin)	Flavonol	TRUE	TRUE	TRUE	TRUE
pme1535	(+)-Gallocatechin (GC)	Polyphenol	TRUE	TRUE	TRUE	TRUE
pme1539	Isorhamnetin 3-O-neohesperidoside	Flavonol	TRUE	TRUE	TRUE	TRUE
pme1541	Acacetin	Flavone	TRUE	TRUE	TRUE	TRUE
pme1550	Tangeretin	Flavone	TRUE	TRUE	TRUE	TRUE
pme1552	Myricetin 3-O-rhamnoside (Myricitrin)	Flavonol	TRUE	TRUE	TRUE	TRUE
pme1562	Epicatechin gallate (ECG)	Polyphenol	TRUE	TRUE	TRUE	TRUE
pme1568	"Orobol (5,7,3',4'-tetrahydroxyisoflavone)"	Isoflavone	TRUE	TRUE	TRUE	TRUE
pme1580	Eriodictyol	Flavanone	TRUE	TRUE	TRUE	TRUE
pme1588	Isorhamnetin	Flavonol	TRUE	TRUE	TRUE	TRUE
pme1598	Hesperetin 5-O-glucoside	Flavanone	TRUE	TRUE	TRUE	TRUE
pme1599	7-O-Methyleriodictyol	Flavanone	TRUE	TRUE	TRUE	TRUE
pme1605	Kaempferol 3-O-robinobioside (Biorobin)	Flavonol	TRUE	TRUE	TRUE	TRUE
pme1611	Isohemiphloin	Flavone	TRUE	TRUE	TRUE	TRUE
pme1624	Isovitexin	Flavone	TRUE	TRUE	TRUE	TRUE
pme1662	sakuranetin	Flavone	TRUE	TRUE	TRUE	TRUE
pme1773	Cyanidin 3-O-rutinoside (Keracyanin)	Anthocyanins	TRUE	TRUE	TRUE	TRUE
pme1777	"Cyanidin 3,5-O-diglucoside (Cyanin)"	Anthocyanins	TRUE	TRUE	TRUE	TRUE
pme1793	Pelargonin	Anthocyanins	TRUE	TRUE	TRUE	TRUE
pme1824	Protocatechuic acid	Polyphenol	TRUE	TRUE	TRUE	TRUE
pme2247	Ellagic acid	Polyphenol	TRUE	TRUE	TRUE	TRUE
pme2319	Hesperetin	Flavanone	TRUE	TRUE	TRUE	TRUE
pme2457	Luteolin 7-O-glucoside (Cynaroside)	Flavone	TRUE	TRUE	TRUE	TRUE
pme2478	Protocatechuic aldehyde	Polyphenol	TRUE	TRUE	TRUE	TRUE
pme2493	"Kaempferol 3,7-dirhamnoside (Kaempferitrin)"	Flavonol	TRUE	TRUE	TRUE	TRUE
pme2898	Dihydromyricetin	Flavonol	TRUE	TRUE	TRUE	TRUE
pme2949	Hesperetin 7-rutinoside (Hesperidin)	Flavanone	TRUE	TRUE	TRUE	TRUE
pme2954	Quercetin	Flavonol	TRUE	TRUE	TRUE	TRUE
pme2957	Naringenin chalcone	Flavanone	TRUE	TRUE	TRUE	TRUE
pme2963	Aromadedrin (Dihydrokaempferol)	Flavonol	TRUE	TRUE	TRUE	TRUE
pme2982	Pinocembrin (Dihydrochrysin)	Flavanone	TRUE	TRUE	TRUE	TRUE
pme2984	Isosakuranetin-7-neohesperidoside (Poncirin)	Flavanone	TRUE	TRUE	TRUE	TRUE
pme3130	Quercetin 4'-O-glucoside (Spiraeoside)	Flavonol	TRUE	TRUE	TRUE	TRUE
pme3211	Quercetin 3-O-glucoside (Isotrifoliin)	Flavonol	TRUE	TRUE	TRUE	TRUE
pme3215	Isoliquiritigenin	Flavanone	TRUE	TRUE	TRUE	TRUE
pme3268	Kaempferol 3-O-galactoside (Trifolin)	Flavonol	TRUE	TRUE	TRUE	TRUE
pme3276	2'-Hydroxygenistein	Isoflavone	TRUE	TRUE	TRUE	TRUE
pme3288	"3,7-Di-O-methylquercetin"	Flavonol	TRUE	TRUE	TRUE	TRUE
pme3292	Prunetin	Isoflavone	TRUE	TRUE	TRUE	TRUE
pme3296	Kaempferol 3-O-rhamnoside (Kaempferin)	Flavonol	TRUE	TRUE	TRUE	TRUE
pme3303	Tricetin	Flavone	TRUE	TRUE	TRUE	TRUE
pme3369	Rhamnetin (7-O-methxyl quercetin)	Flavonol	TRUE	TRUE	TRUE	TRUE
pme3391	Petunidin 3-O-glucoside	Anthocyanins	TRUE	TRUE	FALSE	TRUE
pme3392	Pelargonidin 3-O-beta-D-glucoside（Callistephin chloride)	Anthocyanins	TRUE	TRUE	TRUE	TRUE
pme3399	Sissotrin	Isoflavone	TRUE	TRUE	TRUE	TRUE
pme3401	Syringetin	Flavonol	TRUE	TRUE	TRUE	TRUE
pme3407	Laricitrin	Flavonol	TRUE	TRUE	TRUE	TRUE
pme3442	Quercetin 7-O-β-D-Glucuronide	Flavonol	TRUE	TRUE	TRUE	TRUE
pme3461	Homoeriodictyol	Flavanone	TRUE	TRUE	TRUE	TRUE
pme3464	Isosakuranetin (4'-Methylnaringenin)	Flavanone	TRUE	TRUE	TRUE	TRUE
pme3473	Butin	Flavone	TRUE	TRUE	TRUE	TRUE
pme3484	Myricetin 3-O-galactoside	Flavonol	TRUE	TRUE	TRUE	TRUE
pme3502	Formononetin 7-O-glucoside (Ononin)	Isoflavone	TRUE	TRUE	TRUE	TRUE
pme3509	"7,4'-Dihydroxyflavone"	Flavone	TRUE	TRUE	TRUE	TRUE
pme3514	Morin	Flavonol	TRUE	TRUE	TRUE	TRUE
pme3609	Cyanidin	Anthocyanins	FALSE	FALSE	FALSE	TRUE
pmf0011	"Apigenin 6,8-C-diglucoside"	Flavone	TRUE	TRUE	FALSE	TRUE
pmf0012	"6,8-di-C-glucoside Apigenine"	Flavone	TRUE	TRUE	TRUE	TRUE
pmf0027	Cyanidin 3-O-galactoside	Anthocyanins	TRUE	TRUE	TRUE	TRUE
pmf0057	"4,2',4',6'-Tetrahydroxychalcone "	Flavone	TRUE	TRUE	TRUE	TRUE
pmf0058	"4',5,7-Trihydroxyflavanone"	Flavanone	TRUE	TRUE	TRUE	TRUE
pmf0109	3-O-Acetylpinobanksin	Flavonoid	TRUE	TRUE	TRUE	TRUE
pmf0115	Galangin	Flavonoid	TRUE	TRUE	TRUE	TRUE
pmf0179	Narcissoside	Flavonoid	TRUE	TRUE	TRUE	TRUE
pmf0204	Hyperoside	Flavonoid	TRUE	TRUE	TRUE	TRUE
pmf0208	Isoquercitroside	Flavonoid	TRUE	TRUE	TRUE	TRUE
pmf0216	Catechin gallate，CG	Polyphenol	TRUE	TRUE	TRUE	TRUE
pmf0233	Tiliroside	Flavonoid	TRUE	TRUE	TRUE	TRUE
pmf0238	Theaflavin-3-gallate	Polyphenol	TRUE	TRUE	TRUE	TRUE
pmf0240	Theaflavin	Polyphenol	TRUE	TRUE	TRUE	TRUE
pmf0246	Orientin	Flavonoid	TRUE	TRUE	TRUE	TRUE
pmf0260	Sinensetin	Flavonoid	TRUE	FALSE	TRUE	TRUE
pmf0265	"5,7-Dihydroxychromone"	Flavonoid	TRUE	TRUE	TRUE	TRUE
pmf0274	Herbacetin	Flavonoid	TRUE	TRUE	TRUE	TRUE
pmf0279	Gossypitrin	Flavonoid	TRUE	TRUE	TRUE	TRUE
pmf0302	Engeletin	Flavonoid	TRUE	TRUE	TRUE	TRUE
pmf0330	Spinosin	Flavonoid	TRUE	FALSE	TRUE	TRUE
pmf0344	(-)-Epiafzelechin	Polyphenol	TRUE	TRUE	TRUE	TRUE
pmf0361	Astilbin	Flavonoid	TRUE	TRUE	TRUE	TRUE
pmf0362	Hydroxygenkwanin	Flavonoid	TRUE	TRUE	TRUE	TRUE
pmf0369	Persicoside	Flavonoid	TRUE	TRUE	TRUE	TRUE
pmf0371	Pedalitin	Flavonoid	TRUE	TRUE	TRUE	TRUE
pmf0374	Isorhamnetin 3-O-glucoside	Flavonoid	TRUE	TRUE	TRUE	TRUE
pmf0379	Gallocatechin gallate	Polyphenol	TRUE	TRUE	TRUE	TRUE
pmf0382	"5,7-Dihydroxy-3',4',5'-trimethoxyflavone"	Flavonoid	TRUE	TRUE	TRUE	TRUE
pmf0392	Persicogenin	Flavonoid	TRUE	TRUE	TRUE	TRUE
pmf0458	6-Gingerol	Polyphenol	TRUE	TRUE	TRUE	TRUE
pmf0550	Diosmin	Flavonoid	TRUE	TRUE	TRUE	TRUE
pmf0567	Tectorigenin	Flavonoid	TRUE	TRUE	TRUE	TRUE
pmf0583	Phloridzin	Flavonoid	TRUE	TRUE	TRUE	TRUE
pmf0615	"Petunidin 3, 5-diglucoside"	Anthocyanins	TRUE	TRUE	TRUE	TRUE
pmf0617	Peonidin 3-sophoroside-5-glucoside.	Anthocyanins	TRUE	TRUE	FALSE	TRUE
pmb0622	C-hexosyl-luteolin O-hexoside	Flavone	FALSE	FALSE	TRUE	FALSE
pme3208	Glycitin	Isoflavone	FALSE	FALSE	TRUE	FALSE
pme3285	"Afzelechin (3,5,7,4'-Tetrahydroxyflavan)"	Flavanone	TRUE	TRUE	TRUE	FALSE
pma0779	Tricin O-rhamnosyl-O-malonylhexoside	Flavone	TRUE	TRUE	FALSE	FALSE
pma6515	C-hexosyl-chrysin O-feruloylhexoside	Flavone	TRUE	TRUE	FALSE	FALSE
pmb0579	Chrysoeriol O-sinapoylhexoside	Flavone	TRUE	TRUE	FALSE	FALSE
pmb3024	Luteolin C-hexoside	Flavone	FALSE	TRUE	FALSE	FALSE
pme0367	Apigenin 7-rutinoside (Isorhoifolin)	Flavone	TRUE	TRUE	FALSE	FALSE
pmf0472	Apiin	Flavonoid	TRUE	TRUE	FALSE	FALSE
pmf0616	Malvidin 3-acetyl-5-diglucoside	Anthocyanins	TRUE	TRUE	FALSE	FALSE
pmb0600	Chrysoeriol 7-O-rutinoside	Flavone	TRUE	FALSE	FALSE	FALSE
