# Supplementary material for: <span aria-describedby="tippy-17">Transcriptomic and Metabolomic Profiling Provides Insights into Flavonoids Biosynthesis and Flower Coloring in <em>Loropetalum chinense</em> and <em>Loropetalum chinense</em> var. <em>rubrum</em>
Source: Preprints.org preprint supplement (doi:10.20944/preprints202304.0456.v1), 2023-04-18
Supplement: Supplementary file 35 [file supplementary table S9.xlsx]

## Sheet: Table S9
Supplementary table S9 The differentially concentration of flavonoid metabolites analysis in group of LDPF VS XNNC
Index	Compounds	Class	LDPF1	LDPF2	LDPF3	XNNC1	XNNC2	XNNC3	VIP	Fold_Change	LogFC	type
pma0249	Selgin 5-O-hexoside	Flavone	458000	488000	595000	3450000	3640000	5400000	1.17207	8.10513	3.01883	up
pma0779	Tricin O-rhamnosyl-O-malonylhexoside	Flavone	9	9	9	1790	9890	3630	2.00821	567.037	9.1473	up
pma1108	Apigenin C-glucoside	Flavone	2040	9	9	13100	26400	8850	1.76601	23.4937	4.5542	up
pma6496	Luteolin 6-C-glucoside	Flavone	5000	9	9	9780	9520	6440	1.53753	5.12953	2.35883	up
pma6515	C-hexosyl-chrysin O-feruloylhexoside	Flavone	9	9	9	6480	9000	5660	2.10947	782.963	9.6128	up
pma6576	Spinacetin	Flavone	207000	189000	188000	33900	14800	21000	1.1946	0.119349	-3.06674	down
pma6647	C-hexosyl-chrysoeriol O-hexoside	Flavone	15400	16700	11500	9	9	9	2.2225	0.000619266	-10.6572	down
pmb0579	Chrysoeriol O-sinapoylhexoside	Flavone	9	9	9	12200	20100	16200	2.2369	1796.3	10.8108	up
pmb0588	Luteolin 3',7-di-O-glucoside	Flavone	799000	724000	737000	108000	114000	108000	1.135	0.146018	-2.77578	down
pmb0602	Syringetin 7-O-hexoside	Flavone	12000000	10500000	11300000	1870000	1670000	1710000	1.11618	0.155325	-2.68663	down
pmb0624	6-C-hexosyl-luteolin O-hexoside	Flavone	60700	59800	76200	15000	13400	14600	1.00468	0.218607	-2.19359	down
pmb0628	Eriodictiol C-hexosyl-O-hexoside	Flavone	1830000	1780000	1890000	138000	112000	148000	1.32718	0.0723636	-3.78859	down
pmb0647	8-C-hexosyl-luteolin O-pentoside	Flavone	13200	7900	13400	9	9	9	2.18408	0.000782609	-10.3194	down
pmb0653	di-C,C-hexosyl-apigenin	Flavone	9	9	5990	47900	36200	41700	1.85857	20.9387	4.3881	up
pmb0713	Tricin 7-O-hexosyl-O-hexoside	Flavone	158000	111000	134000	980000	709000	1060000	1.12464	6.82134	2.77006	up
pmb0725	Tricin 7-O-feruloylhexoside	Flavone	10900	11200	10300	2560	2400	2110	1.00874	0.21821	-2.19621	down
pmb0739	Tricin O-hexosyl-O-syringin alcohol	Flavone	135000	136000	205000	8130	7500	7870	1.41236	0.0493697	-4.34023	down
pmb2850	Tricin	Flavone	93400	74000	63100	661000	799000	431000	1.17107	8.2039	3.03631	up
pmb2979	Hesperetin O-malonylhexoside	Flavanone	111000	104000	85100	1230000	1570000	1320000	1.32299	13.7288	3.77913	up
pmb2992	Acacetin O-glucuronic acid	Flavone	4440	1700	2420	23400	40000	25200	1.24193	10.3505	3.37162	up
pmb3014	Luteolin O-eudesmic acid-O-hexoside	Flavone	13100	9980	9950	44600	61400	54200	1.02138	4.85014	2.27803	up
pmb3894	Di-O-methylquercetin	Flavonol	108000	104000	70600	826000	756000	644000	1.17379	7.87686	2.97762	up
pme0205	Catechin	Polyphenol	935000	639000	610000	20900000	22100000	20100000	1.50288	28.8919	4.8526	up
pme0324	Chrysin	Flavone	11500	3590	8950	127000	131000	128000	1.36983	16.0566	4.00509	up
pme0367	Apigenin 7-rutinoside (Isorhoifolin)	Flavone	9	9	9	7110	11400	6100	2.13009	911.481	9.83207	up
pme0442	Delphinidin	Anthocyanins	282000	189000	290000	44000	27600	53200	1.08919	0.163995	-2.60828	down
pme1398	Delphinidin 3-O-glucoside (Mirtillin)	Anthocyanins	56000000	45600000	51000000	10700000	12400000	10700000	1.00218	0.221494	-2.17466	down
pme1521	Dihydroquercetin (Taxifolin)	Flavonol	441000	400000	418000	1820000	1830000	2000000	1.00192	4.48769	2.16597	up
pme1552	Myricetin 3-O-rhamnoside (Myricitrin)	Flavonol	6660000	7730000	6970000	824000	890000	711000	1.20606	0.11353	-3.13885	down
pme1568	Orobol (5,7,3',4'-tetrahydroxyisoflavone)	Isoflavone	15900	10700	10700	117000	111000	109000	1.2149	9.03485	3.1755	up
pme1580	Eriodictyol	Flavanone	1980000	1120000	1610000	39700000	34700000	39600000	1.4624	24.2038	4.59716	up
pme1588	Isorhamnetin	Flavonol	5240000	5770000	3210000	53000000	58500000	53500000	1.28278	11.6034	3.53647	up
pme1599	7-O-Methyleriodictyol	Flavanone	359000	149000	186000	12100000	9110000	9030000	1.59515	43.5735	5.44538	up
pme1624	Isovitexin	Flavone	2950	1560	9	15800	19400	9220	1.32908	9.82961	3.29713	up
pme2319	Hesperetin	Flavanone	27400	17100	21900	2290000	1770000	2050000	1.74107	92.0181	6.52385	up
pme2954	Quercetin	Flavonol	7470000	8960000	5690000	44700000	54900000	51500000	1.13249	6.83092	2.77208	up
pme2982	Pinocembrin (Dihydrochrysin)	Flavanone	32800	22400	56600	259000	254000	264000	1.14056	6.94991	2.79699	up
pme3285	Afzelechin (3,5,7,4'-Tetrahydroxyflavan)	Flavanone	9	9	9	230000	170000	137000	2.5724	19888.9	14.2797	up
pme3296	Kaempferol 3-O-rhamnoside (Kaempferin)	Flavonol	27800000	27700000	27800000	3740000	3990000	4350000	1.13785	0.145018	-2.7857	down
pme3461	Homoeriodictyol	Flavanone	264000	269000	105000	8920000	7320000	8710000	1.57378	39.1066	5.28934	up
pme3464	Isosakuranetin (4'-Methylnaringenin)	Flavanone	146000	29400	41900	481000	603000	432000	1.15319	6.97653	2.80251	up
pme3484	Myricetin 3-O-galactoside	Flavonol	28500000	29100000	32400000	772000	716000	1030000	1.54942	0.0279778	-5.15957	down
pme3609	Cyanidin	Anthocyanins	146000	111000	97100	9	9	9	2.51846	7.62496e-05	-13.6789	down
pmf0057	4,2',4',6'-Tetrahydroxychalcone	Flavone	867000	792000	842000	3810000	4040000	3630000	1.00987	4.59016	2.19855	up
pmf0058	4',5,7-Trihydroxyflavanone	Flavanone	981000	891000	965000	4330000	4320000	4070000	1.00241	4.48361	2.16466	up
pmf0109	3-O-Acetylpinobanksin	Flavonoid	124000	40300	124000	1630000	1930000	1760000	1.40339	18.453	4.20578	up
pmf0115	Galangin	Flavonoid	7790	7150	14000	53500	52300	44000	1.0462	5.17623	2.3719	up
pmf0216	Catechin gallate，CG	Polyphenol	419000	353000	302000	3110000	3420000	2710000	1.19905	8.60335	3.1049	up
pmf0238	Theaflavin-3-gallate	Polyphenol	55000	68500	55700	760000	754000	740000	1.30314	12.5781	3.65284	up
pmf0240	Theaflavin	Polyphenol	57200	65800	55200	782000	723000	753000	1.30462	12.6712	3.66348	up
pmf0260	Sinensetin	Flavonoid	934	1490	1080	9	9	9	1.80047	0.00770548	-7.0199	down
pmf0265	5,7-Dihydroxychromone	Flavonoid	17300	6170	8830	130000	169000	135000	1.32314	13.4365	3.74809	up
pmf0330	Spinosin	Flavonoid	5460	3450	5580	9	9	9	2.04757	0.00186335	-9.06788	down
pmf0362	Hydroxygenkwanin	Flavonoid	5660	4240	2310	37600	27700	32000	1.17622	7.96888	2.99438	up
pmf0382	5,7-Dihydroxy-3',4',5'-trimethoxyflavone	Flavonoid	6700	4880	9680	57900	63900	76200	1.22013	9.31326	3.21929	up
pmf0392	Persicogenin	Flavonoid	3950	9	1530	14300	13400	10600	1.26155	6.97759	2.80273	up
pmf0472	Apiin	Flavonoid	9	9	9	7840	9020	6140	2.1243	851.852	9.73446	up
pmf0616	Malvidin 3-acetyl-5-diglucoside	Anthocyanins	9	9	9	28900	45400	45000	2.36767	4418.52	12.1093	up
pmf0617	Peonidin 3-sophoroside-5-glucoside.	Anthocyanins	5010	3380	3800	78800	105000	67900	1.41938	20.6481	4.36794	up
